# Supplementary material for: Integrative Proteomic and Metabolomic Analysis Reveals the Cotton Plant Defense Mechanisms Induced by Insect (<em>Adelphocoris suturalis</em> Jakovlev) Feeding
Source: Preprints.org preprint supplement (doi:10.20944/preprints201809.0058.v1), 2018-09-04
Supplement: Supplementary file 1 [file supplementary]

## Sheet: 1
Total information of protein identification of each treatment
Treatment name	Total spectra	Spectra	Unique Spetra	Peptide	Unique Peptide	Protein
P48E	371575	87127	52750	17865	12906	5520
P48C	374246	77446	48103	16116	11903	5210
P0C	373127	84359	52474	16483	12135	5313
Total	1118948	248932	153327	24718	19754	8302
					1

## Sheet: 2
Information of 8302 proteins
No.	Protein_ID	Description	Mass	Protein Coverage	Uniq_Pep_Num	Uniq_Spec_Num	Sameset	Protein_ID	Protein_Seqence	NCBInr Identity	NCBInr E-value	NCBInr Accession	NCBInr Description	Swissprot Identity	Swissprot E-value	Swissprot Accession	Swissprot Description	Tremble Identity	Tremble E-value	Tremble Accession	Tremble Description	Protein_or_Domain	COG Score	COG E-value	COG ID	COG Function-Description	COG Code	COG Function-Categories	KEGG(ko_id|rank|evalue|score|identity|ko_definition)	GO Biological_Process	GO Cellular_Component	GO Molecular_Function
1	CotAD_25115	locus=At_chr9:36418923:36421403:+ [translate_table: standard]	35885.3	0.252	-|1|-	-|1|-	-/-/-	CotAD_25115	MATAFHHHYNFTPTPILRRRRSPPSPSPITLHLNAPLSTTFNFPTKQCSSSSSSRITCKATEMSSVSEESAASGGGAGDNWVPVVPLAALPKGERRVIIQDGETILLLWYKDEVFAIENRSPAEGAYTEGLLNAKLTQVKLSIGSEVTSLLLAKAVKWGEECTAFLFSFHEQSLAAVDTHPDGCIVCPTTDSTFDLRTGVIKEWYPKNPVLRALTPALRALYVYPVKTDGENIYISMQGGVKSDAAAEIVFSGKAQPGITASDVNVDEVRMVIDEDSEGFGFTGKNELINGKAAIIGFLLLLDFELLTGKGLLKGTGFLDFIYAASNAFN	73.81	2e-111	gi|255574251|ref|XP_002528040.1|	oxidoreductase, putative [Ricinus communis]	-	-	-	-	73.81	3e-110	B9SPX1	B9SPX1_RICCO Oxidoreductase, putative OS=Ricinus communis GN=RCOM_1102050 PE=4 SV=1	-	-	-	-	-	-	-	-	-	-	-
2	CotAD_54822	locus=scaffold1924.1:187538:192458:+ [translate_table: standard]	27281.1	0.053	-|1|-	-|2|-	-/Cotton_D_gene_10005325;CotAD_74159/-	CotAD_54822	MANLIEKELQKFDRPEKVVIFFSAHGVPLAYVEEAGDPYKAEMEECVDLIIEELEKRKITNAYTLAYQSRVGPVEWLKPYTDDTIVDLGRKGVKGLLAVPISFVSEHIETLEEIDVEYKELALESGIQNWGRVPALGCEPMFISDLADAVIESLPYVGAMAVSNLEARQSLVPLGSVEELLATYDSQRRELPAPVTVWEWGWTKSAETWNGRAAMLAVLVLLLLEVTTGEGFLHQWGILPLFH	93.42	8e-155	gi|147787193|emb|CAN66837.1|	hypothetical protein VITISV_030895 [Vitis vinifera]	89.58	4e-145	sp|O04921|HEMH2_ARATH	Ferrochelatase-2, chloroplastic OS=Arabidopsis thaliana GN=At2g30390 PE=2 SV=1	93.42	1e-153	A5AKE9	A5AKE9_VITVI Ferrochelatase OS=Vitis vinifera GN=VITISV_030895 PE=3 SV=1	ZhemH	73.9	7e-15	COG0276	Protoheme ferro-lyase (ferrochelatase)	H	Coenzyme transport and metabolism ;	K01772|1|2e-155|444|tcc:TCM_003334|EC[not_get]	cellular_process metabolic_process	cell cell_part	catalytic_activity
3	CotAD_63982	locus=Dt_chr6:28058400:28060627:- [translate_table: standard]	33987.5	0.022	-|1|-	-|3|-	-/Cotton_D_gene_10017420/-	CotAD_63982	MATLSCQFHLAIHRLPCNARVRPSFSCSVQPSQSNIKVVINGAAKEIGRAAVIAVTKARGMEVAGAVDSYCVGEDIGKVCDMEEPLEIPIVNDLTMVLGSISQSKETGVVVDFTKPSAVYDNVKQATAFGLRSVVYVPRITVDTISALSAFCEKASMGCLVAPTLSIGSILLQQAAISASFHYNNVEIVESRAHATDLPSPDAIQIANNLSNLGQIYNREDLSTDVSARGQVLGEDGVRVHSMVLPGLPSSTTVYFSGPGEVYTIKHDITDVQCLMPGLLLAIRKVARLKVTDRIAEYTLCLSSSILFRALQK	84.48	0	gi|224136862|ref|XP_002322434.1|	predicted protein [Populus trichocarpa]	78.77	5e-167	sp|Q9FJ82|DAPB3_ARATH	Putative dihydrodipicolinate reductase 3, chloroplastic OS=Arabidopsis thaliana GN=DAPB3 PE=2 SV=1	84.48	0	B9ID05	B9ID05_POPTR Predicted protein OS=Populus trichocarpa GN=POPTRDRAFT_835294 PE=4 SV=1	MA4474	49.7	2e-06	COG0289	Dihydrodipicolinate reductase	E	Amino acid transport and metabolism ;	K16908|1|0.0|511|pop:POPTR_0015s13920g|EC[not_get]	cellular_process metabolic_process single-organism_process	cell cell_part	catalytic_activity
4	Cotton_D_gene_10029782	locus=scaffold63:3044148:3051837:- [translate_table: standard]	73621.9	0.014	1|-|-	1|-|-	CotAD_26775;CotAD_21373/-/-	Cotton_D_gene_10029782	MGIAVAGMDFLSDRASMMREALQKSQTITDNVVSILGSFDSRLSALETAMRPTQIRTHAIRKAHENIDKSLKSAEVILAQFDLSRQAEAKILKGPHEDLEGYLGAIDQLRSNIRFFSSNKNFKNSEGVINHSNTLLAKAISKLEDEFKQRLNSYSKPIEPDRLFDGLPNSLRPSSGSPGNQGEPGGRGPSHNHSEHQNVDLETAVYTPPTLIPPRIIPLLHDLAKQMVRAGHNQQLLKIYKETRSLVLEESLRKLGVEKLGKDDVQKMQWEVLEAKIGNWIHFMRIAVKLLFAGERKVCDEMFEGFDSLSDQCFAEVTASSVSVLLSFGEAIARSKRSPEKLFVLLDMYEIMRELHSEIETIFKGKACNEIRESALGLTKRLAQTAQETFGDFEEAVEK…	85.71	0	gi|225464400|ref|XP_002268110.1|	PREDICTED: exocyst complex component 7 [Vitis vinifera]	25.29	3e-52	sp|O54922|EXOC7_RAT	Exocyst complex component 7 OS=Rattus norvegicus GN=Exoc7 PE=2 SV=1	85.71	0	F6HBF9	F6HBF9_VITVI Putative uncharacterized protein OS=Vitis vinifera GN=VIT_13s0073g00170 PE=4 SV=1	-	-	-	-	-	-	-	K07195|1|0.0|1166|tcc:TCM_044320|EC[not_get]	-	-	-
5	Cotton_D_gene_10013726	locus=scaffold224:655912:656930:+ [translate_table: standard]	23758.4	0.039	-|-|1	-|-|2	-/-/-	Cotton_D_gene_10013726	MVCIRKATMDDLLAMQACNLLCLPENYQMKYYFYHILSWPQLLYVAEDYNGRIVGYVLAKMEDESNECHGHITSLAVLRTHRKLGLATKLMNAAQAAMEQVFGAEYVSLHVRKSNRAAFNLYTQTLGYKIHDVEAKYYADGEDAYDMRKQLKEKTNHHHGHHHHHHHHHHHGGGCCSGDARSGEAAHTRGDSKSESKASTKSDSKTG	89.37	1e-118	gi|255553426|ref|XP_002517754.1|	acetyltransferase complex ard1 subunit, putative [Ricinus communis]	67.53	4e-73	sp|Q3UX61|NAA11_MOUSE	N-alpha-acetyltransferase 11 OS=Mus musculus GN=Naa11 PE=2 SV=1	89.37	2e-117	B9RVI5	B9RVI5_RICCO Acetyltransferase complex ard1 subunit, putative OS=Ricinus communis GN=RCOM_0962820 PE=4 SV=1	PAE2246	52	5e-08	COG0456	Acetyltransferases	R	General function prediction only ;	K00670|1|8e-125|353|tcc:TCM_005836|EC[not_get]			catalytic_activity
6	Cotton_D_gene_10006333	locus=scaffold370:395412:396071:+ [translate_table: standard]	24449.7	0.041	-|1|-	-|1|-	-/CotAD_61595;CotAD_67317;CotAD_64242;Cotton_D_gene_10006330;CotAD_11142;Cotton_D_gene_10002959/-	Cotton_D_gene_10006333	MVFFPLLYPDFFASYHITPPRGLLLCGPPGTGKTLIARALASAASKAGQKVSFYMRKGADVLSKWVGEAERQLKLLFEEAQRNQPSIIFFYEIDGLAPVRSSKQEQIHNSIVSTLLALMDGLDSRGQVVLIGATNRIDAIDGALRRPGRFDREFNFPLPGCEARAEILDIHTRKWKQPPSKELKMELAASCVGYCGADLKALCTEAAIHAFREIPASLY	94.98	3e-118	gi|255584650|ref|XP_002533048.1|	ATP binding protein, putative [Ricinus communis]	91.78	3e-113	sp|F4IAE9|Y1591_ARATH	ATPase family AAA domain-containing protein At1g05910 OS=Arabidopsis thaliana GN=At1g05910 PE=2 SV=1	94.98	4e-117	B9T479	B9T479_RICCO ATP binding protein, putative OS=Ricinus communis GN=RCOM_0068780 PE=3 SV=1	ECU01g1230	189	3e-55	COG0464	ATPases of the AAA+ class	O	Posttranslational modification, protein turnover, chaperones ;	K13525|1|1e-43|155|egr:104425084|EC[not_get]			binding catalytic_activity
7	CotAD_58319	locus=At_chr9:74372739:74373355:+ [translate_table: standard]	15234.1	0.068	-|-|1	-|-|1	-/-/-	CotAD_58319	MVRKRGSVKKATKPVEEHSSTVTTVHESESSMPTEKKKLVSRKYFEVIFPPRIGHSPFAIARLGQASLILWDAKKINELYNTKVDVDEHFKFIEDITDEKKELLVKDLCVKGALWTGYYPLLISPQLASLECV	-	-	-	-	-	-	-	-	-	-	-	-	-	-	-	-	-	-	-	-	-	-	-
8	CotAD_72767	locus=At_chr8:65903003:65906519:+ [translate_table: standard]	30955.6	0.025	1|-|-	1|-|-	Cotton_D_gene_10018919;CotAD_41892/-/-	CotAD_72767	MHYWVRAFASDFSGTPPQPRSGHTAVPIGKSKIVVFGGLLDKKFLSDITVYDIENKLWFQPECTGNGSDGQVGPNPRAFHVAVAIDCHMFIFGGRSGNRRLGDFWVLDTDIWQWSELTSFGDLPSSRDFSAASAIENRKIVMYGGWDGKKWLSDVYILDTISLEWMELSVTGSLPPPRCGHTATMVEKRLLVFGGRGGGGPIMSDLWALKGLIEEGRERNTWMDPIEASRSIAFSPLWTYGHIRRALCNVISKSLTDLAVHLNLAELKTAEDAKLAC	85.59	3e-133	gi|225449698|ref|XP_002267817.1|	PREDICTED: rab9 effector protein with kelch motifs-like [Vitis vinifera]	29.46	2e-21	sp|Q7M3S9|RNGB_DICDI	RING finger protein B OS=Dictyostelium discoideum GN=rngB PE=2 SV=2	85.14	3e-130	B9SAM3	B9SAM3_RICCO Putative uncharacterized protein OS=Ricinus communis GN=RCOM_1104670 PE=4 SV=1	-	-	-	-	-	-	-	K15450|1|1e-23|103|ppp:PHYPADRAFT_149655|EC[not_get]	-	-	-
9	CotAD_19999	locus=At_chr6:49915471:49920962:+ [translate_table: standard]	47218.5	0.043	-|2|1	-|5|1	-/CotAD_13561;Cotton_D_gene_10036022/CotAD_13561;Cotton_D_gene_10036022	CotAD_19999	MGVSNIFNPASLCLLKSNVRQTQRRIRSFEGNQKGLIMATFSSSPSTVPVEHVNQKLSGDSFIRPHLRKLSPYQPILPFEVLSAKLGRKPEDIIKLDANENPYGPPPEVLEALGSLKFPYIYPDPESRQLRAALAEDSGIESDYILVGCGCDELIDLIMRCVLDPGDKIVDCPPTFTMYEFDAGVNGAQVIKVPRKPDFSLNIEAIAEAVEHEKPKCIFLTSPNNPDGSIISDEVLLKILDMPILVVLDEAYIEFSGNESRMQWVKKHDNLIVLRTFSKRAGLAGLRVGYGSFPLSIIEYLWRAKQPYNVSVAAEVAACAALQNPKYLELVKDALIQERDRLFKLLKEIPFLNPYPSYSNFILCEVTSGMDAKKLKDDLSKMGVMVRHYNNKELKGYIR…	78.87	0	gi|255564464|ref|XP_002523228.1|	histidinol-phosphate aminotransferase, putative [Ricinus communis]	76.08	0	sp|Q9FEW2|HIS8_NICPL	Histidinol-phosphate aminotransferase, chloroplastic OS=Nicotiana plumbaginifolia GN=HPA PE=1 SV=1	78.87	0	B9SB59	B9SB59_RICCO Histidinol-phosphate aminotransferase, putative OS=Ricinus communis GN=RCOM_0785090 PE=3 SV=1	CAC3031	161	2e-45	COG0079	Histidinol-phosphate/aromatic aminotransferase and cobyric acid decarboxylase	E	Amino acid transport and metabolism ;	K00817|1|0.0|723|tcc:TCM_036337|EC[not_get]	cellular_process metabolic_process single-organism_process		binding catalytic_activity
10	Cotton_D_gene_10007359	locus=scaffold185:628379:628766:- [translate_table: standard]	7183.42	0.097	1|-|-	2|-|-	-/-/-	Cotton_D_gene_10007359	MSKSCKGLAMELVKCLSESDCVKVEKRSVRECAGEKSPCIPSECVGLRETYFNCKRGQGLGF	94.83	6e-33	gi|255545096|ref|XP_002513609.1|	conserved hypothetical protein [Ricinus communis]	46.43	1e-07	sp|O42921|PT191_SCHPO	Mitochondrial protein pet191 homolog OS=Schizosaccharomyces pombe (strain 972 / ATCC 24843) GN=SPBC16A3.16 PE=2 SV=1	94.83	7e-32	B9RIP0	B9RIP0_RICCO Putative uncharacterized protein OS=Ricinus communis GN=RCOM_1581380 PE=4 SV=1	-	-	-	-	-	-	-	K18178|1|6e-35|115|cic:CICLE_v10017354mg|EC[not_get]	-	-	-
11	CotAD_74960	locus=Dt_chr10:53807676:53817795:+ [translate_table: standard]	124358	0.04	2|4|-	3|5|-	Cotton_D_gene_10039650;Cotton_D_gene_10039922;CotAD_55834;CotAD_61522/Cotton_D_gene_10039650;CotAD_61522/-	CotAD_74960	MDQQSQLALILGPDPIPFETLVSHLMSSSNEQRSHAEALFNLCKQSDPDALCLRLAHLLQVCTQPEIRAMAAILLRKLLTRDDSYIWPRLNISTQSSLKSVLLSQIQVETTKNLSKKLCDTVAELASSILPENGWPELLPFMFQCVSSDSPKLQESAFLIFAQLSQYIGDVLTPFIKDLHTVFLRCLSESSNADVKIAALNAVINFIQCLTSSSDRDRFQDLLPAMMRTLTEALNNGNEATAQEALELLIELAGTEPRFLRRQLVDVVGSMLQIAEAESLEEGTRHLAIEFVVTLAEARERAPGMMRKLPQFISRLFAILMRMLLDIEDDAAWHTAESEDEDAGETSNYSVGQECLDRLAISLGGNTIVPVASEQLPAYLAASEWQKHLAALIALAQIA…	89.18	0	gi|462400598|gb|EMJ06155.1|	hypothetical protein PRUPE_ppa000523mg [Prunus persica]	36.41	0	sp|Q8BKC5|IPO5_MOUSE	Importin-5 OS=Mus musculus GN=Ipo5 PE=1 SV=3	89.46	0	F6GUN0	F6GUN0_VITVI Putative uncharacterized protein OS=Vitis vinifera GN=VIT_06s0004g00500 PE=4 SV=1	YLR347c	61.2	1e-08	COG5215	Karyopherin (importin) beta	U	Intracellular trafficking, secretion, and vesicular transport ;	K11498|1|2e-23|105|zma:103655235|EC[not_get]!K18752|2|7e-10|67.0|brp:103837787|EC[not_get]	localization		transporter_activity
12	CotAD_38968	locus=At_chr2:28931186:28933939:- [translate_table: standard]	75029.9	0.511	11|9|10	106|104|107	Cotton_D_gene_10013863/Cotton_D_gene_10013863/Cotton_D_gene_10013863	CotAD_38968	MANSLLSSNFFGTQLLLSPPTPKTTRKLQVTQSILNKKPNSSHSVKTLQSHATIAALLFSSVAPQALAVDNAPPTPPPVIEAQPTKPSPSNQSPFSQNLLLTAPKPQSQSSDLPEGSQWRYSEFLNAVKKGKVERVRFSKDGSALQLTAVDGRRATVIVPNDPDLIDILAMNGVDISVSEGDSGNGLFNFIGNLLFPFLAFAGLFFLFRRAQGGPGGPGGLGGPMDFGRSKSKFQEVPETGVTFSDVAGADQAKLELQEVVDFLKNPDKYTALGAKIPKGCLLVGPPGTGKTLLARAVAGEAGVPFFSCAASEFVELFVGVGASRVRDLFDKAKSKAPCIVFIDEIDAVGRQRGAGLGGGNDEREQTINQLLTEMDGFSGNSGVIVLAATNRPDVLDAA…	90.7	0	gi|449455581|ref|XP_004145531.1|	PREDICTED: ATP-dependent zinc metalloprotease FTSH, chloroplastic-like [Cucumis sativus]	86.18	0	sp|O82150|FTSH_TOBAC	ATP-dependent zinc metalloprotease FTSH, chloroplastic OS=Nicotiana tabacum GN=FTSH PE=2 SV=2	90.52	0	B9GQ31	B9GQ31_POPTR Precursor of protein cell division protease ftsh-like protein OS=Populus trichocarpa GN=POPTRDRAFT_550790 PE=3 SV=1	SMc04459	544	0	COG0465	ATP-dependent Zn proteases	O	Posttranslational modification, protein turnover, chaperones ;	K03798|1|0.0|1248|tcc:TCM_034357|EC[not_get]	cellular_process metabolic_process	cell cell_part	binding catalytic_activity
13	Cotton_D_gene_10009672	locus=scaffold259:530438:530730:- [translate_table: standard]	7657.77	0.261	-|1|-	-|1|-	-/-/-	Cotton_D_gene_10009672	MSGCPGKNSWPELVGKDGESAKTTIERENSNVDAIVLLDGTPVTRDFRCDRVWVWVDSNGHVVRPPTIG	98.55	4e-44	gi|399240828|gb|AFP43221.1|	proteinase inhibitor [Gossypium arboreum]	61.76	2e-25	sp|P19873|ITH5_CUCMA	Inhibitor of trypsin and hageman factor OS=Cucurbita maxima PE=1 SV=1	69.57	3e-28	B9S4U9	B9S4U9_RICCO Proteinase inhibitor, putative OS=Ricinus communis GN=RCOM_0992990 PE=4 SV=1	-	-	-	-	-	-	-	-	-	-	-
14	Cotton_D_gene_10033280	locus=scaffold104:1857915:1859494:+ [translate_table: standard]	38920.1	0.042	-|2|1	-|10|7	-/CotAD_15100;CotAD_39012/CotAD_15100;CotAD_39012	Cotton_D_gene_10033280	MGFSKLFVIILGLLLALTLDHCTAQEFRCSSPSSCRALVGYITVNNTNLGAIQSLFNVSSFQSLLGANDLPLSTPRNRTIAARQLIRVPINCACYNGTGTSSGGPTYTIQPGDGLYHIAAEVFSQLVLFPQIAAANNISNPDLIAAGDTLQIPLPCSCDDIDGQKVVHYAHVVEPNSTLPEIAQEFGTNEATLARINGITAQNQLKAEQPIDVPLKACNSSVRSDSLDFPLLAANGTYVFTANGCVRCTCEAANNWTLQCEPSQNRPSRWERCPSMQCEDSQGLSLGNVTTSGCSRTTCSYAGFNNSTIFTTLVQDSSCTTSTPSNDVSRINLKWDIVIISVLLSLHLVMLETI	57.05	2e-111	gi|224078525|ref|XP_002305553.1|	predicted protein [Populus trichocarpa]	50.69	4e-89	sp|O23006|LYM2_ARATH	LysM domain-containing GPI-anchored protein 2 OS=Arabidopsis thaliana GN=At2g17120 PE=1 SV=1	57.05	2e-110	B9H1Q9	B9H1Q9_POPTR Predicted protein (Fragment) OS=Populus trichocarpa GN=POPTRDRAFT_196402 PE=4 SV=1	DR0888	52.4	3e-07	COG1652	Uncharacterized protein containing LysM domain	S	Function unknown ;	K13473|1|2e-65|213|zma:100384051|EC[not_get]!K04733|5|7e-35|137|obr:102714327|EC[not_get]	-	-	-
15	CotAD_04300	locus=At_chr8:78534174:78536691:- [translate_table: standard]	36661.6	0.056	1|-|-	1|-|-	-/-/-	CotAD_04300	MEVEVDEKDLKSAGAELLKDGRRGLRIHGWEIESRKRSILNSSALQQWEQKLHTSHFPEMIFGESCLVLKHLGSGTKIHFNTFDALAAWKQEGLPPVEVPAAAKWKFRSKPFQQVILDYDYTFTTPYCGSETVELELDSDKHGSGGISEGDSGLHWEDCKEQLDMAALTLREPILFYDEVVLYEDELADSGVSLLTVKVRVMPSSWFLLLRFWLRVDGVLMRLRDTRMHCVFDESANPVILRERCWREGTFQALSAKGYPTDSASYSDPSSISQRLPVIMHQTQKLVVPGNGNCLARQIRLTVTIAKSGKKSSKVDKLEGVV	79.17	3e-166	gi|359475460|ref|XP_002270710.2|	PREDICTED: TIP41-like protein-like [Vitis vinifera]	33.21	7e-41	sp|Q54MI6|TIPRL_DICDI	TIP41-like protein OS=Dictyostelium discoideum GN=tiprl PE=3 SV=1	79.17	4e-165	D7SXV6	D7SXV6_VITVI Putative uncharacterized protein OS=Vitis vinifera GN=VIT_03s0091g00270 PE=4 SV=1	-	-	-	-	-	-	-	K17607|1|1e-179|500|tcc:TCM_046718|EC[not_get]	-	-	-
16	CotAD_32268	locus=At_chr9:44189388:44194915:- [translate_table: standard]	116314	0.015	1|-|1	2|-|6	CotAD_27353/-/CotAD_27353	CotAD_32268	MDFDKRKASTLASLSSNEADNSPKGSLDTPIIPLINVLNNHLSYFTTSSCSGRISILSQPKPNPSSNNPTKKKARGGTWLFITHDTADPDSVISLLFSDSTKLIQDSELVFRFEPLIIAVECRDLISAQSLVSLAIACGFRESGITSVSKRVIVGIRCSIRLEVPLGDTQKIMVSEDYLRFLVGVANEKMEANWKRTEGFLRSFRKSQDGTLENATGSKCSVSGGDCNEDQDGLERSFVDSQNIVPSEKARFSRESLVETEGIPGCSLSISQMVIAGEPIERLFLWGHSTCTLESTNKAEVLIFGGFGGSGKHARRDDSFLLDPLHGTLREINVAGRPSPRLGHTASLIGDCMYVIGGRADPTNKLSEVWILNTLKNEWRLLDRTGSAFPPRHRHAAAA…	64.26	0	gi|302144138|emb|CBI23243.3|	unnamed protein product [Vitis vinifera]	58.77	0	sp|Q8W4K1|TYW23_ARATH	tRNA wybutosine-synthesizing protein 2/3/4 OS=Arabidopsis thaliana GN=At4g04670 PE=2 SV=1	64.43	0	F6H7M2	F6H7M2_VITVI Putative uncharacterized protein OS=Vitis vinifera GN=VIT_10s0116g01770 PE=4 SV=1	PAB0505	83.6	1e-16	COG2520	Predicted methyltransferase	R	General function prediction only ;	K15450|1|0.0|1645|tcc:TCM_030223|EC[not_get]	-	-	-
17	Cotton_D_gene_10000479	locus=scaffold511:53721:56035:+ [translate_table: standard]	24222.2	0.362	1|-|1	1|-|1	CotAD_05657/-/CotAD_05657	Cotton_D_gene_10000479	MAGYRAEDDYDYLFKVVLIGDSGVGKSNLLSRFTRNEFSLESKSTIGVEFATRSLNVDGKVIKAQIWDTAGQERYRAITSAYYRGAVGALLVYDVTRHSTFENVERWLRELRDHTDPNIVVMLIGNKSDLRHLVAVPTEDGKSFAEKESLYFMETSALEATNVENAFAEVLTQIYHIVSKKAMETADEGTASTVPSKGEKIDVGKDISAMKKGGCCSS	95.87	4e-155	gi|49333370|gb|AAT64010.1|	putative GTP-binding protein [Gossypium hirsutum]	89.45	3e-145	sp|Q9FK68|RAA1C_ARATH	Ras-related protein RABA1c OS=Arabidopsis thaliana GN=RABA1C PE=1 SV=1	95.87	5e-154	Q6DXU0	Q6DXU0_GOSHI Putative GTP-binding protein OS=Gossypium hirsutum PE=3 SV=1	YDL137w	49.7	5e-07	COG1100	GTPase SAR1 and related small G proteins	R	General function prediction only ;	K07904|1|6e-158|438|tcc:TCM_029653|EC[not_get]	biological_regulation cellular_process localization regulation_of_biological_process response_to_stimulus signaling single-organism_process		binding catalytic_activity
18	CotAD_11511	locus=scaffold189.1:338293:338646:+ [translate_table: standard]	13177.4	0.137	-|-|1	-|-|1	-/-/Cotton_D_gene_10011214;CotAD_30483	CotAD_11511	MSENQKPQSHQNLPSSPNKSIPEIESNAASDFSGHQRVRFPNPPDLTNPDPSTLRDQWRYAIRQYSRWYSHAWGTAILAGVSFFALGWVIKGSNPLPSFNSDKNKNDSDTNKNDNSK	67.02	2e-40	gi|449433784|ref|XP_004134677.1|	PREDICTED: uncharacterized protein LOC101219058 [Cucumis sativus]	-	-	-	-	74.67	2e-35	B9S942	B9S942_RICCO Putative uncharacterized protein OS=Ricinus communis GN=RCOM_1012240 PE=4 SV=1	-	-	-	-	-	-	-	-	-	-	-
19	CotAD_69802	locus=At_chr11:91957049:91957528:+ [translate_table: standard]	18201.9	0.063	1|-|-	2|-|-	CotAD_41672;Cotton_D_gene_10015499;CotAD_11431;Cotton_D_gene_10031615/-/-	CotAD_69802	MVEKDELVEYAVVYGDYKGIPKKQIREFMAKGCDIVLRVDIQGAETLRKTLGDSGVFIFLVAESELALVERLIERKTESKEELLVRIATARQEVKFVKRFDYVVVNAHGKLEEAVNLVGDLSLMLRRLRLGRGRHSFEILTSSLWFLLLLVEFCVIGNG	79.83	3e-60	gi|224107255|ref|XP_002314423.1|	predicted protein [Populus trichocarpa]	42.61	3e-27	sp|Q3ZWD8|KGUA_DEHSC	Guanylate kinase OS=Dehalococcoides sp. (strain CBDB1) GN=gmk PE=3 SV=1	79.83	4e-59	B9HY82	B9HY82_POPTR Predicted protein (Fragment) OS=Populus trichocarpa GN=POPTRDRAFT_229479 PE=4 SV=1	RC1194	70.9	5e-15	COG0194	Guanylate kinase	F	Nucleotide transport and metabolism ;	K00942|1|2e-73|224|tcc:TCM_020482|EC[not_get]	cellular_process metabolic_process single-organism_process	cell cell_part organelle	catalytic_activity
20	CotAD_26207	locus=At_chr6:6256188:6257885:+ [translate_table: standard]	34266.2	0.033	-|-|1	-|-|1	-/-/Cotton_D_gene_10026967	CotAD_26207	MKSVRYFPEDQVLGEIKKKRSKATEDAAAASHNNSKDESHYLREEEEEDRTEIPQVTHGYDLVKGKMDHGMEDYVVLESRRINGHDIRLYAIFDGHLGRDVAKYLHSHLFDKMLSQSDFWRNPEGAIKRAYKEMDDEILEDVAGSRGGSTAVSAILIDRKKLMVANVGDSRAILCGGDGVKQVTIDHEPNKEKQVVESRGGFVSKKPGNVPRVDGQLAMTRAFGDGKLKEHITSEPDVRIEIIEPNTVEFIILASDGLWKVMSNEEAFDEIREYDDAQEASQVLIKEALARGSRDDISCIVVAFG	62.46	7e-124	gi|255564365|ref|XP_002523179.1|	protein phosphatase 2c, putative [Ricinus communis]	66.53	1e-118	sp|O64583|P2C28_ARATH	Probable protein phosphatase 2C 28 OS=Arabidopsis thaliana GN=At2g34740 PE=2 SV=2	62.46	9e-123	B9SB19	B9SB19_RICCO Protein phosphatase 2c, putative OS=Ricinus communis GN=RCOM_1336580 PE=4 SV=1	BS_yloO	48.5	5e-06	COG0631	Serine/threonine protein phosphatase	T	Signal transduction mechanisms ;	K14803|1|2e-124|361|rcu:RCOM_1336580|EC[not_get]			catalytic_activity
21	Cotton_D_gene_10036395	locus=scaffold47:4813234:4816337:- [translate_table: standard]	75757.3	0.381	-|3|-	-|27|-	-/-/-	Cotton_D_gene_10036395	MASSTAQIHVLGGIGFASSRKPNHHSPRTVFLGQRLNKTSPLNAAFLRLAKTNNNGKRYSVGPVRVVNEKVVGIDLGTTNSAVAAMEGGKPTIVTNAEGQRTTPSVVAYTKTGDRLVGQIAKRQAVVNPENTFFSVKRFIGRKMSEVDEESKQVSYKVIRDDNGNVKLDCPAIGKQFAAEEISAQVLRKLVDDASKFLNDKVTKAVVTVPAYFNDSQRTATKDAGRIAGLEVLRIINEPTAASLAYGFEKKNNETILVFDLGGGTFDVSVLEVGDGVFEVLSTSGDTHLGGDDFDKRIVDWLAENFKRDEGIDLLKDKQALQRLTETAEKAKMELSSLTQANISLPFITATADGPKHIETTITRVKFEELCSDLLDRLKTPVENSLRDAKLSFKDIDEV…	90.83	0	gi|255570990|ref|XP_002526446.1|	heat shock protein, putative [Ricinus communis]	83.01	0	sp|Q9LTX9|HSP7G_ARATH	Heat shock 70 kDa protein 7, chloroplastic OS=Arabidopsis thaliana GN=HSP70-7 PE=1 SV=1	90.83	0	B9SKC7	B9SKC7_RICCO Heat shock protein, putative OS=Ricinus communis GN=RCOM_0759010 PE=3 SV=1	dnaK	666	0	COG0443	Molecular chaperone	O	Posttranslational modification, protein turnover, chaperones ;	K03283|1|0.0|1183|aly:ARALYDRAFT_495046|EC[not_get]	cellular_process metabolic_process response_to_stimulus		binding catalytic_activity
22	CotAD_58121	locus=Dt_chr2:23804477:23807319:- [translate_table: standard]	23634.9	0.165	-|3|1	-|14|9	-/Cotton_D_gene_10036169;CotAD_23080;Cotton_D_gene_10001734/Cotton_D_gene_10036169;CotAD_23080;Cotton_D_gene_10001734	CotAD_58121	MGSSSGKSSGSYDLSFKILLIGDSGVGKSSLLVSFISASAEDLAPTIGVDFKIKFLTVGGKRLKLTIWDTAGQERFRTLTSSYYRGAQGIILVYDVTRRETFTNLSTVWAKEVELYSTNQDCVKMLVGNKVDRDSERAVSREEGMELAKELGCMFLECSAKTRKNVEQCFEGLSLKIMEVPSFLEEGSAIGKRNMLKHKPEYRGHQGGGCCS	86.07	1e-124	gi|225441147|ref|XP_002267276.1|	PREDICTED: ras-related protein RABC2a [Vitis vinifera]	84.58	6e-124	sp|O49841|RAC2A_ARATH	Ras-related protein RABC2a OS=Arabidopsis thaliana GN=RABC2A PE=1 SV=1	86.07	2e-123	D7TIU1	D7TIU1_VITVI Putative uncharacterized protein OS=Vitis vinifera GN=VIT_08s0007g04740 PE=3 SV=1	alr0124_2	47.8	5e-06	COG1100	GTPase SAR1 and related small G proteins	R	General function prediction only ;	K07910|1|5e-132|372|tcc:TCM_022301|EC[not_get]	biological_regulation cellular_process localization metabolic_process regulation_of_biological_process response_to_stimulus signaling single-organism_process	cell cell_part organelle	binding
23	CotAD_18612	locus=scaffold71.1:1043837:1044795:- [translate_table: standard]	34212.5	0.091	-|2|1	-|4|1	-/CotAD_30889;Cotton_D_gene_10019113/CotAD_30889;Cotton_D_gene_10019113	CotAD_18612	MISLEGVSSIRKTHDMLPIHSKPKLWNPSIAPNPPTFKKILPLKISNTWNENKEANESKAGRIKRLVLSNEGRTKLNTFPDREFYAYPRFVTHVDDGFIATLTDLYRERLKPGSEILDLMSSWISHLPNEVVYKRVVGHGLNAQELARNSRMDYFFVKDLNQDQKLEIEDSSFDAVLCTVSVQYLQQPEKAFAEVFRVLRPGGVFIVSFSNRLFYEKAINAWRDGTAYSRVQLVLQYFQCIEGFTQPEVIRELPSAGNSQDDKSPCSWFMKWLGLFSGSDPFYAVIAYKNFKPVYD	73.94	4e-157	gi|296087574|emb|CBI34830.3|	unnamed protein product [Vitis vinifera]	-	-	-	-	73.94	5e-156	D7TWF5	D7TWF5_VITVI Putative uncharacterized protein OS=Vitis vinifera GN=VIT_14s0066g00160 PE=4 SV=1	L196904	50.4	7e-07	COG0500	SAM-dependent methyltransferases	QR	Secondary metabolites biosynthesis, transport and catabolism ; General function prediction only ;	-	cellular_process metabolic_process single-organism_process		catalytic_activity
24	CotAD_11762	locus=Dt_chr8:23720101:23722982:- [translate_table: standard]	26093.2	0.065	2|-|-	2|-|-	Cotton_D_gene_10014912;CotAD_59178/-/-	CotAD_11762	MGDLISIHPSELKFPFELRRQSSCSMQLTNKTEKYVAFKVKTTNPKKYCVRPNSGIVLPGSSCNVTVTMQAQKEAPPEPCRDKFLVQSVVTPDGTTSKDITPEMFNKEDGRVVNEFKMRVIYIPANPPSPVPEGSEEGTPPRASSQENGNQNFEEVSRSLEYTKEKSSEAWSAISKLTDEKSSALQQNQRLRQELEQIRKDISKSRAGGFSLMFVMLVGLLGVLVGYFVKRG	75.23	2e-97	gi|462414755|gb|EMJ19492.1|	hypothetical protein PRUPE_ppa010720mg [Prunus persica]	69.77	2e-84	sp|Q84WW5|VAP13_ARATH	Vesicle-associated protein 1-3 OS=Arabidopsis thaliana GN=PVA13 PE=2 SV=1	72.9	6e-92	B9RD79	B9RD79_RICCO Vesicle-associated membrane protein, putative OS=Ricinus communis GN=RCOM_1610730 PE=4 SV=1	YER120w	70.1	7e-14	COG5066	VAMP-associated protein involved in inositol metabolism	U	Intracellular trafficking, secretion, and vesicular transport ;	K17302|1|5e-23|100|sita:101779298|EC[not_get]!K04730|2|5e-18|85.1|sbi:SORBI_09g000636|EC[not_get]	-	-	-
25	CotAD_04865	locus=scaffold56.1:580052:580735:+ [translate_table: standard]	15704.9	0.448	3|2|2	97|59|80	Cotton_D_gene_10013268/Cotton_D_gene_10013268/Cotton_D_gene_10013268	CotAD_04865	MASCCNMASAASGFLPTPTVSAGTSKTNNNNMVFFPSKTNNTSRLVVRAADEASPPPPSPTPATTTAPPEGGEAPKPKPPPIGPKRGTKVKILRRESYWYNSYGSVVTVDQDPKTRYPVVVRFNKVNYANVSTNNYALDEIEEVK	65.93	4e-40	gi|255560287|ref|XP_002521161.1|	photosystem I reaction center subunit IV A, chloroplast precursor [Ricinus communis]	55.07	7e-32	sp|Q9S714|PSAE2_ARATH	Photosystem I reaction center subunit IV B, chloroplastic OS=Arabidopsis thaliana GN=PSAE2 PE=1 SV=1	65.93	5e-39	B9S592	B9S592_RICCO Photosystem I reaction center subunit IV A, chloroplast OS=Ricinus communis GN=RCOM_1723530 PE=4 SV=1	-	-	-	-	-	-	-	K02693|1|1e-46|150|tcc:TCM_003771|EC[not_get]	-	-	-
26	CotAD_71679	locus=scaffold4719.1:15137:18440:- [translate_table: standard]	46941.5	0.036	1|-|-	1|-|-	Cotton_D_gene_10000588;CotAD_28065/-/-	CotAD_71679	MYLKSKKGKPPPPPGPLGLPLVGNLPFLRTDLHSYFSELAHIYGPVVKLQLGGKLAILITSPSTAREVLKDQDIAFANRDVPVVAKVVTGGRDIVWNPYGPEWRMLRKVCVIKMLSNATLDKVYSLRRQEVRETIGYLYSKAGSPVNVGEQMFLTILNVVTNMLWGGSMEGEARASLGAEFRQVISEVTELLGLPNVSDFFPALAPLDLQGAVKRDMVVGGSDTSSNSIEFTMAEIINKPEVMRKAQQELDEVVGKDNFVEESHIHKLPYLLAVMKESLRLHPVLPLLVPHCPSEPNTVGGYAIPKGSRVFVNAWAIHRDPSIWENPLEFNPDRFLNSQWDFSGSDFRYFPFGSGRRICAGIAMAERMVLYSVASLLHSFDWQVPGGEKLDLSEKFGIV…	63.36	0	gi|462404841|gb|EMJ10305.1|	hypothetical protein PRUPE_ppa005322mg [Prunus persica]	36.12	1e-81	sp|D1MI46|C76BA_SWEMU	-	61.81	0	B9RBQ8	B9RBQ8_RICCO Cytochrome P450, putative OS=Ricinus communis GN=RCOM_1679920 PE=3 SV=1	BS_yetO_1	70.5	1e-12	COG2124	Cytochrome P450	Q	Secondary metabolites biosynthesis, transport and catabolism ;	K13083|1|5e-87|276|mus:103993499|EC[not_get]!K05280|2|4e-86|273|mdm:103421965|EC[not_get]			binding catalytic_activity
27	Cotton_D_gene_10023404	locus=scaffold117:1578108:1579717:+ [translate_table: standard]	47155	0.455	2|-|-	14|-|-	-/-/-	Cotton_D_gene_10023404	MAGLAPEGSQFDARQYDQKMTELLQTDGDDFFTSYDEVYDSFDAMGLQENLLRGIYAYGFEKPSAIQQRGIVPFCKGLDVIQQAQSGTGKTATFCSGILQQLDYAVVQCQALVLAPTRELAQQIEKVMRALGDYLGVKVHACVGGTSVREDQRILQSGVHVVVGTPGRVFDMLRRQSLRPDYIKMFVLDEADEMLSRGFKDQIYDIFQLLPAKIQVGVFSATMPPEALEITRKFMNKPVRILVKRDELTLEGIKQFYVNVEKEEWKLETLCDLYETLAITQSVIFVNTRRKVDWLTDKMRSRDHTVSATHGDMDQNTRDVIMREFRSGSSRVLITTDLLARGIDVQQVSLVINYDLPTQPENYLHRIGRSGRFGRKGVAINFVTTDDERMLFDIQKFYN…	95.88	0	gi|283049400|gb|ADB07168.1|	DEAD-box RNA helicase-like protein [Prunus persica]	95.4	0	sp|Q40467|IF414_TOBAC	Eukaryotic initiation factor 4A-14 OS=Nicotiana tabacum PE=2 SV=1	95.88	0	D2X5K2	D2X5K2_PRUPE DEAD-box RNA helicase-like protein OS=Prunus persica PE=2 SV=1	AF2254	251	8e-80	COG0513	Superfamily II DNA and RNA helicases	LKJ	Replication, recombination and repair ; Transcription ; Translation, ribosomal structure and biogenesis ;	K03257|1|0.0|839|tcc:TCM_029076|EC[not_get]			binding catalytic_activity
28	CotAD_16852	locus=At_chr2:7384492:7387522:- [translate_table: standard]	64056.2	0.059	-|1|1	-|2|2	-/-/-	CotAD_16852	MTAKHYLFLFLFIFCFSSFPSHARFITGRPSPTGLLSDGISTVKNLPYLLLKPPVSAEESCEQSYGFLPCTTTVLGNMFLIIVYGYLMYLAATYLSYGSELLLEILGPGIVGGLFLPMLGALPDAMLILVSGLSGTAETAQSQVSVGMGLLAGSTVMLLTVIWGSCIIVGRCDLHDSVAIDGTNTKGFNLKESGVSTDIWTCYAARIMAISVIPFLIVQLPQALSSTSGRHLAVLIALIISLLMLVSYCVYQVFQPWIQRRRLAFAKHKHVISGILRHLKKHALGRLLTDDGEPDTEIIRKLFETIDENHDGGLSPSELRALIIGIRFEEIDLDQDDAVSKVIADFDTSRDNLVQEDEFVEGITKWINEAKQTGGAYLESNTGTFKFIDHFHQQTKREH…	73.7	0	gi|225461603|ref|XP_002282948.1|	PREDICTED: uncharacterized protein LOC100252144 [Vitis vinifera]	31.43	4e-09	sp|Q99385|VCX1_YEAST	Vacuolar calcium ion transporter OS=Saccharomyces cerevisiae (strain ATCC 204508 / S288c) GN=VCX1 PE=1 SV=1	72.79	0	Q8L636	Q8L636_ARATH Calcium-binding EF-hand domain-containing protein OS=Arabidopsis thaliana GN=At1g53210 PE=2 SV=1	YDL128w	62.4	1e-09	COG0387	Ca2+/H+ antiporter	P	Inorganic ion transport and metabolism ;	K07300|1|3e-06|53.5|mdm:103405254|EC[not_get]	localization	cell cell_part membrane organelle organelle_part	binding
29	CotAD_12114	locus=Dt_chr13:50762356:50766596:- [translate_table: standard]	41730.5	0.11	1|1|1	3|2|1	-/-/-	CotAD_12114	MESDSAMVAFPLLTTPIESNYRACTIPYRFPSDNPRKATPTEIAWIDLFRNSIPSFKKRAESDTTVVDAPTKAEKFAQRYADILDDIKKDPESHGGPPDCTLLCRLREQVLRELGFRDIFKKVKDEENTKAISLFPEVVRLNDDIEDGGKRLENLVRGIFAGNIFDLGSAQLAEVFSRDGMSFLASCQNLVPRPWVIDDLDTFKAKWNKKSWKKASPSYAVIFVDNSGADVILGILPFARELLKRGTQVVLAANDLPSINDVTYPELIEIISKLKDESGKLIGVDTSNLLIANSGNDLPVIDLTRVSQELAYLASDADLVILEGMGRGIETNLYAQFKCDSLKIGMVKHPEVAQFLGGRLYDCVFKYNEVLG	87.87	0	gi|255546706|ref|XP_002514412.1|	pantothenate kinase, putative [Ricinus communis]	84.05	0	sp|Q949P3|Y2734_ARATH	Uncharacterized protein At2g17340 OS=Arabidopsis thaliana GN=At2g17340 PE=1 SV=1	87.87	0	B9RKZ3	B9RKZ3_RICCO Pantothenate kinase, putative OS=Ricinus communis GN=RCOM_1566320 PE=4 SV=1	-	-	-	-	-	-	-	K09680|1|0.0|550|cam:101494363|EC[not_get]	cellular_process metabolic_process		catalytic_activity
30	Cotton_D_gene_10022237	locus=scaffold215:2207038:2209729:- [translate_table: standard]	40658.7	0.063	2|-|2	4|-|2	CotAD_11784/-/CotAD_11784	Cotton_D_gene_10022237	MPILKSYGACLRESSFQFPRSHRIDNYKRRNVKWRSPQAAIIPDFHLPMRSFEVKNRTSAEDIKALRLITAIKTPYLPDGRFDLEAYDDLVNMQIENGAEGVIVGGTTGEGQLMSWDEHIMLIGHTVNCFGGSVKVIGNTGSNSTREAIHATEQGFAVGMHAALHINPYYGKTSLEGLVSHFNSVLPMGPTIIYNVPSRTGQDIPPRVVNTVAQSPNLAGIKECVGNDRIEQYTGNGIVVWSGNDDQCHDARWSHEATGVISVTSNLVPGLMHELMFNGKNASLNAKLLPLIQWLFEEPNPIGLNTALAQLGVVRPVFRLPYVPLPLEKRVKFVELVNEIGRENFVGEKDVQVLDDDDFILVGRY	85.21	0	gi|224063919|ref|XP_002301301.1|	predicted protein [Populus trichocarpa]	79.73	0	sp|Q9FVC8|DAPA2_ARATH	Dihydrodipicolinate synthase 2, chloroplastic OS=Arabidopsis thaliana GN=DHDPS2 PE=2 SV=2	85.21	0	B9GPI1	B9GPI1_POPTR Predicted protein OS=Populus trichocarpa GN=POPTRDRAFT_816566 PE=4 SV=1	RSc1145	140	2e-38	COG0329	Dihydrodipicolinate synthase/N-acetylneuraminate lyase	EM	Amino acid transport and metabolism ; Cell wall/membrane/envelope biogenesis ;	K01714|1|0.0|654|tcc:TCM_005490|EC[not_get]	cellular_process metabolic_process single-organism_process		catalytic_activity
31	CotAD_32749	locus=At_chr4:85663629:85681760:+ [translate_table: standard]	136003	0.03	3|-|-	3|-|-	-/-/-	CotAD_32749	MGDPLERLGSEAAMGLESTIKEELSMEIDPPLKENLATAEDWRKALNKVVPAVVVLRTTACRAFDTEPAGASYATGFVVDKRRGIILTNRHVVKPGPVVAEAMFVNREEITVHPIYRDPVHDFGFFRYNPDAIQFLDYEEIPLSPEAACVGLEIRVVGNDSGEKVSILAGTLARLDRDAPHYKKDGYNDFNTFYMQAASGTKGGSSGSPVIDWQGRAVALNAGSKSSSASAFFLPLERVVRALKFLQKGGDLYMSKWEAISIPRGTLQATFVHKGFDEIRRLGLQSETEQIARHASALGETGMLVVDSVVPGGPAHSHLEPGDVLVRVNGEVITQFLKLETLLDDSVEQKIELEIERGGTPLSVQLVVQDLHSITPAHFLEVSGAVIHPLSYQQARNFR…	80.75	0	gi|359488197|ref|XP_002271823.2|	PREDICTED: protease Do-like 7-like [Vitis vinifera]	74.36	0	sp|Q8RY22|DEGP7_ARATH	Protease Do-like 7 OS=Arabidopsis thaliana GN=DEGP7 PE=2 SV=1	80.75	0	F6HSL4	F6HSL4_VITVI Putative uncharacterized protein OS=Vitis vinifera GN=VIT_14s0006g01570 PE=4 SV=1	DR1756	53.5	2e-06	COG0265	Trypsin-like serine proteases, typically periplasmic, contain C-terminal PDZ domain	O	Posttranslational modification, protein turnover, chaperones ;	K01259|1|2e-71|243|mdm:103428105|EC[not_get]!K14289|2|2e-17|92.0|tcc:TCM_026445|EC[not_get]	metabolic_process		catalytic_activity
32	Cotton_D_gene_10007182	locus=scaffold223:26059:27460:+ [translate_table: standard]	31010.1	0.107	3|1|1	6|8|5	CotAD_14021/CotAD_14021/CotAD_14021	Cotton_D_gene_10007182	MALSSASVFTHPLAISTLTRRPLGVSLRYHRLHHHRSPTFATLSSSSQPPSSTAVTPPPTSASENTLLSQTHQHPNPGSFNYALANPKGDSLLGIARSTESNIEKVIFDFRFLALFAVGGSLAGSLLCFLNGCVYIFEAYKVYWTGCVKGIHTGNMVLRLVEAIDVYLAGTVMLIFGMGLYGLFISNLNPELPADVDRALKGSSLFGMFAMKERPKWMKISSLDELKTKVGHVIVMILLVKMFERSKMVAINTGMDLLSYAICIFLSSASLYILHHLHKPE	81.34	2e-122	gi|356557188|ref|XP_003546900.1|	PREDICTED: uncharacterized protein LOC100799451 [Glycine max]	-	-	-	-	80.84	2e-120	B9RVJ9	B9RVJ9_RICCO Putative uncharacterized protein OS=Ricinus communis GN=RCOM_0963860 PE=4 SV=1	aq_286	55.1	1e-08	COG2862	Predicted membrane protein	S	Function unknown ;	K14457|1|2e-13|71.6|zma:103649057|EC[not_get]	-	-	-
33	Cotton_D_gene_10022945	locus=scaffold25:1141222:1144758:- [translate_table: standard]	34759.3	0.036	-|-|1	-|-|1	-/-/CotAD_73286	Cotton_D_gene_10022945	MAETLMHALQYDSYGGGAAALKHVEVPIPTPNKDEMLLKLDAISLNPVDWKIQEGVLRPFLPRKFPCIPASDVAGEVVKVGPGVTNFKAGDKVVAALHHFTGGGLAEYAVAKENLTVARSPEVSAAEGAGLPVAGLTAHQALTQAAGVKLDGSGQQVNLLITAASGGVGHYAVQLAKLGNTHVTATCGARNLDFVKSLGADEVLDYKTPDGAALKSPSGRKYDAVIHCAAGIPWSTFEPNLSSNGKVIDITPGPSAFLTFAMKKLTFSKKKLEPLFVSLKKENLNYLVNLVKDGKLKTVIDSKYPLSKAEEAWAKSIDGHATGKIIVEP	81.46	0	gi|462397211|gb|EMJ03010.1|	hypothetical protein PRUPE_ppa008401mg [Prunus persica]	76.9	0	sp|Q9SV68|QORH_ARATH	Putative quinone-oxidoreductase homolog, chloroplastic OS=Arabidopsis thaliana GN=At4g13010 PE=2 SV=1	80	0	B9GIK0	B9GIK0_POPTR Predicted protein OS=Populus trichocarpa GN=POPTRDRAFT_549573 PE=4 SV=1	DR1061	92.4	2e-20	COG0604	NADPH:quinone reductase and related Zn-dependent oxidoreductases	CR	Energy production and conversion ; General function prediction only ;	K18980|1|2e-41|150|ppp:PHYPADRAFT_153994|EC[not_get]	-	-	-
34	Cotton_D_gene_10018618	locus=scaffold88:208276:219968:- [translate_table: standard]	165581	0.016	1|-|-	1|-|-	-/-/-	Cotton_D_gene_10018618	MMAQQDGSDEMESVRIQLSNIGRSVSTEEVQTLRTLTSFDDDGDYDDDDDDDDDYCYDDDDDEYESQWAAVERLPLFERITTALFDDKVGRKRLVNVTKLGPDERHCFIDKLIKHVQNDNLSLLEKLRHRIDRAGVQLPSVEVRYKNLSVQAECQVVHGKPLPTLWNATKGVFSGISNLLGSKQEAKISILKDVNGIIKPGRMTLLLGPPGCGKTTFLLALAGKLSQTLEVSGEITYNGYGLDEFNPRKTSTYVSQYDLHTPEMTVRETLAFSARFQGVGSRAEIIKEVSQREKQAGIVPDPDVDAYMKAISVEGTESTLQTDYILKILGLDNCADTMVGDAIRRGISGGEKKRLTTGEMIVGPTKVLFMDEISNGLDSSTSFQVVSCIQHLVHHTDAT…	67.91	0	gi|470124511|ref|XP_004298256.1|	PREDICTED: pleiotropic drug resistance protein 3-like [Fragaria vesca subsp. vesca]	63.51	0	sp|Q5W274|PDR3_TOBAC	Pleiotropic drug resistance protein 3 OS=Nicotiana tabacum GN=PDR3 PE=2 SV=1	67.37	0	B9RFG3	B9RFG3_RICCO ATP-binding cassette transporter, putative OS=Ricinus communis GN=RCOM_1434460 PE=4 SV=1	DRA0007	80.9	1e-15	COG1131	ABC-type multidrug transport system, ATPase component	V	Defense mechanisms ;	K05681|1|9e-53|197|ppp:PHYPADRAFT_41350|EC[not_get]	cellular_process metabolic_process single-organism_process	membrane	binding catalytic_activity transporter_activity
35	CotAD_49163	locus=scaffold1852.1:26703:28397:+ [translate_table: standard]	65136.8	0.016	-|-|1	-|-|1	-/-/-	CotAD_49163	MLQEISDHKSKGAFEKVAEDPPAASVVVRPVEQPVGLESTIQKVWNCIGETDVGIIGLWGMGGVGKTTFLTQLKNMFSTPPNDFKVVIWALVSQYYDVGKIQNRIGENIGFPRSWENKSVEQKARDIYGILSNKRFVVLLDDLWEKVDLNEFGIPEPSQENGSKLILTSRSFTVCNIMGAQKIIRVNCLDSEKAWELFQDKVGYEALNSHPDIPNLAKHVAERCCGLPLALITVGRAMACKTTLEEWNYAIEMMNRPLALSTIIYEVVFPLLKFSYDNLPNATMKYCFLYCCLYPKDYCIPKKRLVEYWFCEGLLNEFDRVSDAQMQSDDIISSLLNACLLENGGEIHGEECVKMHDMMHDMALWITSESEATENNFFVKAGARLCKEPNVVAWESVKR…	50.09	3e-164	gi|462413206|gb|EMJ18255.1|	hypothetical protein PRUPE_ppa001182mg [Prunus persica]	46.68	2e-132	sp|P60839|DRL2_ARATH	Probable disease resistance protein At1g12290 OS=Arabidopsis thaliana GN=At1g12290 PE=2 SV=1	49.1	1e-161	B9GGA8	B9GGA8_POPTR Cc-nbs-lrr resistance protein OS=Populus trichocarpa GN=POPTRDRAFT_798001 PE=4 SV=1	-	-	-	-	-	-	-	K13459|1|0.0|569|tcc:TCM_027187|EC[not_get]	-	-	-
36	CotAD_21304	locus=At_chr11:440017:443401:- [translate_table: standard]	65469.4	0.351	1|1|1	7|6|6	-/-/-	CotAD_21304	MASTFTAMSSVGSFVAPNGLVMDKKLPSSSNRLSSLASISSSSFVSRRNVVLRRSRLPKISAAKELHFNKDGSAIKKLQTGVNKLADLVGVTLGPKGRNVVLESKYGSPKIVELEDPVENIGAKLVRGGAAKTNDLAGDGTTTSVVLAQGLIAAGVKVVAAGANPVLITRGIEKTTRALVSELKAISKEVEDSELADVAAVSAGNNNEVEDSELADVAAVSAGNNYEVGNMIAEAMSKVGRKGVVTLEEGKSAENSLYVVEGMQFDRGYISPYFVTDSEKMAVEYENCKLLLVDKKITNARDLINILEEAIRSGYPILIIAEDIEQEALATLVVNKLRGALKIAALKAPGFGERKSQYLDDIAILTGGTVIRDEVGLSLDKASKEVLGHASKVVLTKDT…	87.7	0	gi|224073124|ref|XP_002303983.1|	predicted protein [Populus trichocarpa]	88.03	0	sp|P08927|RUBB_PEA	RuBisCO large subunit-binding protein subunit beta, chloroplastic OS=Pisum sativum PE=1 SV=2	87.7	0	B9GXY0	B9GXY0_POPTR Predicted protein OS=Populus trichocarpa GN=POPTRDRAFT_712747 PE=3 SV=1	ECs5124	513	1e-176	COG0459	Chaperonin GroEL (HSP60 family)	O	Posttranslational modification, protein turnover, chaperones ;	K04077|1|0.0|1006|tcc:TCM_039855|EC[not_get]	cellular_process metabolic_process	cell cell_part	binding
37	Cotton_D_gene_10023154	locus=scaffold217:813332:825942:+ [translate_table: standard]	82799.8	0.081	2|-|2	4|-|2	-/-/-	Cotton_D_gene_10023154	GWKSRWVLSDWKRSEGKAGTFKHTAGKWSGDPDDKGIQTYNDAKHYAISAKIPEFSNKNRTLVVQYSIKIEQDIECGGGYIKLLSGYVNQKKFGGDTPYSFMFGPDICGTQTKKLHVILSYQGQNYPIRKDLQCETDKLTHFYTFILRPDASYSVLIDNRERETGSMYTDWDILPPRKIKDVKAKKPADWDDREYIEDPNDVKPEGYDKIPAQIPDPKAKEPDDWDDEEDGIWKPPKIPNPAYKGPWKRKKIKNPNYKGKWKTPWIDNPEFEDDPDLYVLRPIKYVGIEVWQVKAGSVFDNILICDDPQYAREVVEDIWARNREAEKEAFEEAEKERRAREEEEAKRAREEGEKRRRERDHRHRDRRHRRRHDPRDYLDDYHVRSGLCVWPGLRQFCIR…	91.22	0	gi|462419484|gb|EMJ23747.1|	hypothetical protein PRUPE_ppa006217mg [Prunus persica]	87.38	0	sp|O04153|CALR3_ARATH	Calreticulin-3 OS=Arabidopsis thaliana GN=CRT3 PE=2 SV=2	91.25	0	B9HGZ3	B9HGZ3_POPTR Predicted protein OS=Populus trichocarpa GN=POPTRDRAFT_562210 PE=3 SV=1	SPAC824.07	118	3e-29	COG0491	Zn-dependent hydrolases, including glyoxylases	R	General function prediction only ;	K08057|1|0.0|623|pper:PRUPE_ppa006217mg|EC[not_get]	-	-	-
38	CotAD_15106	locus=scaffold413.1:98065:99921:+ [translate_table: standard]	19152.4	0.081	-|2|2	-|2|5	-/Cotton_D_gene_10000318/Cotton_D_gene_10000318	CotAD_15106	MASIPCIFQIPFTAKPINPSFPSLPTFSSKFLGTQNSLSCLRPSNIGPSNGSRTQCWFKFGKNGVDAEGAGIYGSQKRDDFDKDDVEQYFNYMGMLAVEGSYDKMEALLNQNIHPVDILLMLAASEGDQPKIEELLRAGAVYDVKDADGRTAVDRAVNEEIKDFILGFSVQKA	73.99	7e-93	gi|462408021|gb|EMJ13355.1|	hypothetical protein PRUPE_ppa012342mg [Prunus persica]	80.42	2e-83	sp|Q8VY88|LTD_ARATH	Protein LHCP TRANSLOCATION DEFECT OS=Arabidopsis thaliana GN=LTD PE=1 SV=1	74.71	6e-91	D7T0C7	D7T0C7_VITVI Putative uncharacterized protein OS=Vitis vinifera GN=VIT_19s0177g00340 PE=4 SV=1	-	-	-	-	-	-	-	K01802|1|1e-10|60.8|fve:101303016|EC[not_get]	-	-	-
39	CotAD_02155	locus=Dt_chr5:18840333:18845082:+ [translate_table: standard]	17414.8	0.134	1|1|-	1|1|-	Cotton_D_gene_10002311;CotAD_68752/-/-	CotAD_02155	MALLDVSTNSLIVGDHCVGQGSAALDITSGGNMTEYFQTSYKFLELSPHTLIPMHGRVNLWPKNMLCGYLKNRRSREESILQAIENGAETLFDIVANVYSGVDRNLWTAAASNVRLHVDHLDQQKKLPKGFSMENFIGSLVAFESLVVAFEPNSGKL	77.86	5e-76	gi|462418740|gb|EMJ23003.1|	hypothetical protein PRUPE_ppa004908mg [Prunus persica]	32.81	2e-13	sp|Q9VLS9|LACB2_DROME	Beta-lactamase-like protein 2 homolog OS=Drosophila melanogaster GN=CG12375 PE=1 SV=1	71.71	5e-73	D7T920	D7T920_VITVI Putative uncharacterized protein OS=Vitis vinifera GN=VIT_01s0011g03830 PE=4 SV=1	SMc00087	48.5	1e-06	COG0491	Zn-dependent hydrolases, including glyoxylases	R	General function prediction only ;	-			catalytic_activity
40	CotAD_20258	locus=Dt_chr6:18251364:18254484:+ [translate_table: standard]	44276.4	0.059	1|1|1	4|1|2	Cotton_D_gene_10020642;CotAD_31989/Cotton_D_gene_10020642;CotAD_31989/Cotton_D_gene_10020642;CotAD_31989	CotAD_20258	MESRLLSRASTIAGLPQIRPKLSRDCLSVSFASAKPIGAVGEGGNVIWGRQLRPSLLLESSLANKREILKTVLASASSAAGGGSDSAGDAEIAPVGFFQKYPALVTGFFFFMWYFLNVIFNILNKKIYNYFPYPYFVSVIHLFVGVVYCLISWAVGLPKRAPIDSNLLKLLIPVAVCHALGHVTSNVSFAAVAVSFTHTIKALEPFFNAAASQFILEQSIPLTLWLSLAPVVIGVSMASLTELSFNWTGFISAMISNISFTYRSIYSKKAMTDMDSTNVYAYISIIALLVCIPPAIIFEGPQLMKHGFTDAIAKVGMTKFISDLFWVGMFYHLYNQLATNTLERVAPLTHAVGNVLKRVFVIGFSILAFGNKISTQTGIGTAIAIAGVAMYSFIKARME…	85.43	0	gi|255536723|ref|XP_002509428.1|	Triose phosphate/phosphate translocator, chloroplast precursor, putative [Ricinus communis]	78.59	0	sp|P11869|TPT_SPIOL	Triose phosphate/phosphate translocator, chloroplastic OS=Spinacia oleracea PE=1 SV=1	85.43	0	B9RB94	B9RB94_RICCO Triose phosphate/phosphate translocator, chloroplast, putative OS=Ricinus communis GN=RCOM_1673220 PE=4 SV=1	-	-	-	-	-	-	-	K15283|1|0.0|698|tcc:TCM_029804|EC[not_get]	localization	membrane membrane_part
41	Cotton_D_gene_10031287	locus=scaffold70:1434347:1439786:- [translate_table: standard]	96660.8	0.009	-|-|1	-|-|2	-/-/CotAD_00770;CotAD_60705	Cotton_D_gene_10031287	MESMGTLTTIHHFCFFFTVLFIFFPKISVSVDTLSGTQFITQNQTIVSQGDVFELGFFNLDNPGEWYVGIWYKNIPDRTYVWVANRDNPVSNSSGVFKVEDRNLVLLDEGNNLVWSSNITKGDADKYNPVAQLLDSGNLVLREANSNGETDYYLWRSFDYPTDTLLPDMKLGWDLNTGFNRFLTSWKTRNDPSSGDFTFKLDYKGFPEIFLRNKQDIEYRSGPWNGLRFSGVPEMKPLDYMNFSFVTNQDEVYYSFYITNNNLFSRLIVTPTGTLERLTWIPDTKQWNPFWYAPKDQCDEYSECGPYGICDTNASPVCKCPKGFTPKNEQAWDLRDGSNGCVRKNDLDCGKDKFLHLVNMKLPESTNTVVYRSVNFKDCQAFCARNCSCTAFSNWDIRN…	71.81	0	gi|255555127|ref|XP_002518601.1|	S-locus-specific glycoprotein S6 precursor, putative [Ricinus communis]	61.72	0	sp|O81905|SD18_ARATH	Receptor-like serine/threonine-protein kinase SD1-8 OS=Arabidopsis thaliana GN=SD18 PE=1 SV=1	71.81	0	B9RXY2	B9RXY2_RICCO S-locus-specific glycoprotein S6, putative OS=Ricinus communis GN=RCOM_0907020 PE=3 SV=1	MT0018	80.5	3e-15	COG0515	Serine/threonine protein kinase	RTKL	General function prediction only ; Signal transduction mechanisms ; Transcription ; Replication, recombination and repair ;	K04733|1|0.0|617|pper:PRUPE_ppa018740mg|EC[not_get]	cellular_process metabolic_process single-organism_process		binding catalytic_activity
42	CotAD_71971	locus=scaffold4644.1:37127:40958:- [translate_table: standard]	30935.1	0.033	1|-|-	1|-|-	CotAD_49206;Cotton_D_gene_10007826;CotAD_73336;Cotton_D_gene_10030772/-/-	CotAD_71971	MEAGVACKLNYPTWIESERFGRNSTGSLRFGRIAKEEHKARLAVLPHFPVLTSSNRFRSVSFEISCSSSKNFSASTIETGSVHAPYDEALVLKKWYFFVDVYQLPIDALIEQEVNGMSVAEIFKLHGERFFRKKETEVLQRLSSKKQLVVSTGGGAVVCDVNWDYMQKKGIVVWLDVPLEALAQRIAAVGTHSRPLLHYEHGDPYTKALKRLSYLLELRGKNYAKANARVSLEEIAGKLGYRDVSDLTPTEIAIEALQQIEGYLKEEGGMIVAGL	53.62	3e-96	gi|462401264|gb|EMJ06821.1|	hypothetical protein PRUPE_ppa009120mg [Prunus persica]	46.23	2e-79	sp|Q9SJ05|SK1_ARATH	-	51.67	1e-89	Q30CZ9	Q30CZ9_FAGSY Putative shikimate kinase OS=Fagus sylvatica PE=2 SV=1	BS_aroI	56.2	4e-09	COG0703	Shikimate kinase	E	Amino acid transport and metabolism ;	K00891|1|3e-151|427|tcc:TCM_001246|EC[not_get]	-	-	-
43	CotAD_49033	locus=Dt_chr2:8103730:8104844:+ [translate_table: standard]	19300.5	0.047	1|-|-	4|-|-	CotAD_13034/-/-	CotAD_49033	MVASNFSLALTLAAIISVWLAADAAHHHHTASAPSPSPSPSSSSSSVDCSSLILNMADCLSFVSSGSEVSKPEGTCCSGLKTVLKTDAECLCEAYKSSASLGVTLNVTKAMSLPALCKVSAPPTNCAISLTPAGAPGMQPSTSARAPTALSEGANEVAPAPAPGSSGSSLLSVSAGSLVVGLMIVLVSGWR	70.27	3e-45	gi|255578847|ref|XP_002530278.1|	lipid binding protein, putative [Ricinus communis]	67.26	2e-43	sp|Q9ZQI8|NLTL2_ARATH	Non-specific lipid-transfer protein-like protein At2g13820 OS=Arabidopsis thaliana GN=At2g13820 PE=1 SV=1	70.27	4e-44	B9SWA9	B9SWA9_RICCO Lipid binding protein, putative OS=Ricinus communis GN=RCOM_0266100 PE=4 SV=1	-	-	-	-	-	-	-	-	localization	membrane membrane_part	binding catalytic_activity
44	CotAD_40870	locus=At_chr9:50541054:50542320:+ [translate_table: standard]	23775.6	0.095	1|1|1	1|1|3	-/-/-	CotAD_40870	MAMVLWLLFSPFLFLSVSVNTQTKVTDNPADELVAALNANRTAHKSSALTDNPGLACIALQYIKAYQGDCKAVGEAKKPADSEFSETFAPNCGVEASTLSPITGRLLGCQSKYVEPSEAFSMLMKNEKSLEILYNKNHTEVGAGVTGSDGGGPYFWCVLFSNGKHNSSFVAQGGVAKISRPGCFSGANDECSGANDLSRLHHMWLYAVTAFVAAGYAFGI	75	1e-102	gi|255550177|ref|XP_002516139.1|	conserved hypothetical protein [Ricinus communis]	-	-	-	-	75	2e-101	B9RQX0	B9RQX0_RICCO Putative uncharacterized protein OS=Ricinus communis GN=RCOM_0707330 PE=4 SV=1	-	-	-	-	-	-	-	K15082|1|1e-85|271|cic:CICLE_v10010155mg|EC[not_get]	-	-	-
45	Cotton_D_gene_10039578	locus=scaffold26:3322477:3324697:+ [translate_table: standard]	46066.3	0.063	2|1|2	5|3|4	CotAD_32056/CotAD_32056/CotAD_32056	Cotton_D_gene_10039578	MVPISGLDKKSSLQVIHKHGPCSQPHEEKANIPTHAQILLLDEVRVKSIHSKLAKNLGSVNVMKKDAAANLPAKDGSVVGSGNYIITMGLGTPKKNLRLIFDTGSDITWTQCQPCLRSCYKQQDPIFSPSSSSTYSNVSCSSAACTSLNSATGNSPGCSSSTCVYGIQYGDSSFSIGLFAKEKLTLTSNVVFDNFLFGCGQNNQGLFGGAAGLLGLGRNKLSFPSQTAIKFKKIFSYCLPSSPSSTGFLKFGNDGLSKSVKFTTLSTISGGESFYGITIIAMSVGGKKLSISASILAAGGAIIDSGTVITRLPPTAYSALRSAFRKQMNQYPMAKPLSILDTCYDFSKYSTVSIPKISLFFEKGVEVPIDARGILYVNSISQVCLAFAGNTNDFDVLIY…	67.14	3e-164	gi|224142001|ref|XP_002324349.1|	predicted protein [Populus trichocarpa]	34.59	2e-46	sp|Q9LHE3|ASPG2_ARATH	Protein ASPARTIC PROTEASE IN GUARD CELL 2 OS=Arabidopsis thaliana GN=ASPG2 PE=2 SV=1	67.14	4e-163	B9IL97	B9IL97_POPTR Predicted protein OS=Populus trichocarpa GN=POPTRDRAFT_1106310 PE=4 SV=1	-	-	-	-	-	-	-	K01381|1|1e-20|95.9|smo:SELMODRAFT_13348|EC[not_get]!K11450|3|9e-10|64.7|gmx:100810687|EC[not_get]!K19025|4|2e-06|53.5|tcc:TCM_030990|EC[not_get]			catalytic_activity
46	CotAD_63765	locus=At_chr9:69117882:69119312:+ [translate_table: standard]	49198	0.016	1|-|-	1|-|-	CotAD_41954;CotAD_70254;CotAD_70256;Cotton_D_gene_10005900;Cotton_D_gene_10034112;Cotton_D_gene_10034111;CotAD_13546;CotAD_54552/-/-	CotAD_63765	MIRIGVHPALVVNSSDVAKEIFTVNDMHVSSRSEFAAAEHLGYNYAMFGFSPYGQFWREMRKITMLEVLSNHRIDQLKKVFVSEVEGSMKLLYNTWADKKNGSGKVLVEMKKHFSDLTLNVIMRTVAGKRYSVGAEEDQKEVLRYRTALRDFFHLTGMFVLGDAVPFLRWLDFGGYEKKMKKTAKELDEISGGWLDDHRKGGHWDENKKEKDFMDVMISVLKGASLAGYDADTINKATSLNMILAGSDTTTVTLIWGAQEELDTHIGRDRFVNETDIGKLVYIQAIVKETLRMYPPAPLSAPRELSESCSIGGYDIPKGTRLIINLHKIQRDPKKWPEPSEFKPERFLTTHKDIDVKGQHFELMPFGSGRRSCPGTSFALHMLYLTMSNFLHAFDFSTP…	60.22	0	gi|462419558|gb|EMJ23821.1|	hypothetical protein PRUPE_ppa004175mg [Prunus persica]	51.34	2e-163	sp|O49858|C82A3_SOYBN	Cytochrome P450 82A3 OS=Glycine max GN=CYP82A3 PE=2 SV=1	58.04	0	F6H1G0	F6H1G0_VITVI Putative uncharacterized protein OS=Vitis vinifera GN=VIT_18s0001g11500 PE=3 SV=1	VNG0422G	69.3	3e-12	COG2124	Cytochrome P450	Q	Secondary metabolites biosynthesis, transport and catabolism ;	K00517|1|2e-172|496|mdm:103414808|EC[not_get]	-	-	-
47	CotAD_03942	locus=Dt_chr7:7723517:7727324:- [translate_table: standard]	40737.5	0.229	1|1|1	3|4|6	-/-/-	CotAD_03942	MAELVKDKESGVAAAGGGKMDIEHSRTFLEARSEEGMEEFYRNYKNAVFQSEDPAAAETVLSNMAVALDLMLLDVEDPFVFQPYHKALREPFDYYMFGQNYIRPLIDFRNSYVGNLSLFYEIEEKLKQGHNVVLFSNHQTEADPAVIALLLEKTNPHIAENLIYVAGDRVITDPLCKPFSMGRNLICVYSKKHMFDVPELADMKRKANIRSLKEMALLLRTGSKLVWIAPSGGRDRPDPVTGEWNPAPFDSSSVDNMRRLIESSGAPGHMYPLALLCYDIMPPPSKVEKEIGERRIISFHGAGLSVAPEVAANCEKSEEVKDVFTQALYKSVTEQYNVLKSAIHGKQGLEASTAGIALSQPWN	74.04	0	gi|255555915|ref|XP_002518993.1|	plastidial glycerol-phosphate acyltransferase [Ricinus communis]	69.49	0	sp|Q39639|PLSB_CUCSA	Glycerol-3-phosphate acyltransferase, chloroplastic OS=Cucumis sativus PE=2 SV=1	74.04	0	B9RZ24	B9RZ24_RICCO Plastidial glycerol-phosphate acyltransferase OS=Ricinus communis GN=RCOM_1316770 PE=4 SV=1	-	-	-	-	-	-	-	K00630|1|0.0|651|tcc:TCM_016600|EC[not_get]	cellular_process metabolic_process single-organism_process	cell cell_part organelle organelle_part	catalytic_activity
48	Cotton_D_gene_10029949	locus=scaffold11:3384255:3386588:+ [translate_table: standard]	33464.9	0.066	2|2|2	12|4|12	CotAD_25848;CotAD_31696/CotAD_25848;CotAD_31696/CotAD_25848;CotAD_31696	Cotton_D_gene_10029949	MGWAIAVHGGAGDIPLSLPPEKRLPREAGLRRCLDVGIAALKAHNHPLDVVELVVRELEKQSHFNAGKGSVLTTSGTVEMEACIMDGKTMKCGAVSGVSTVVNAISLARLVMDKTPHIYLAFDGAEAFAREQGLETVEMSHFITPENIERLKQAQEALDYTQPIQKEVPKDAALADGDSQIGTVGCVAVDNEGNLATATSTGGIVNKMVGRIGDTPIIGAGTYANHLCAVSATGRGEAIIRGTIARDVAAVMEFKGLSLKEAAAYVIDQVPRGNAGLVAVSSTGEVAMPFNTTGMFRACATEDGYSEIAIWDSPTK	81.33	2e-179	gi|255547103|ref|XP_002514609.1|	l-asparaginase, putative [Ricinus communis]	76.58	3e-163	sp|P50287|ASPGA_ARATH	Isoaspartyl peptidase/L-asparaginase 1 OS=Arabidopsis thaliana GN=At5g08100 PE=1 SV=2	81.33	3e-178	B9RLJ0	B9RLJ0_RICCO L-asparaginase, putative OS=Ricinus communis GN=RCOM_1467530 PE=4 SV=1	VNG1872C	75.5	5e-15	COG1446	Asparaginase	E	Amino acid transport and metabolism ;	K13051|1|0.0|556|tcc:TCM_014361|EC[not_get]			catalytic_activity
49	Cotton_D_gene_10038147	locus=scaffold57:2679018:2682980:+ [translate_table: standard]	33198.3	0.219	3|3|4	58|73|64	-/-/-	Cotton_D_gene_10038147	MANPSCLLYAFLLLVAFQSTMMNANTVIQPPQCRPVAASSREKIIFSVNLLLYQAEFLLHASVDAGINDISPGLVQGPDPIGATIANFSNPVRRVVEELGLATVGHLRALVQAGILDAPITRPQMDVSAEAYAGFVNVAFNVSTLTPPFNIYANTPSFVAAAKGFSAFIQQYYAGIIPSIVGNVQQQLVTGIGLSQSAGLGVLRTLLNDVINSTVQPYTFTAAELSNRTSEVVNRLGGCGVKAEGLIVPLQLGAENRTTSNVVPGDVNSLAFVRFEREILSMVFGTGNATMPGGLFPRGFIGSLYRRNRDS	39.29	2e-59	gi|224061357|ref|XP_002300440.1|	predicted protein [Populus trichocarpa]	35.45	5e-41	sp|P22242|DRPE_CRAPL	Desiccation-related protein PCC13-62 OS=Craterostigma plantagineum PE=2 SV=1	39.29	2e-58	B9GGY2	B9GGY2_POPTR Predicted protein OS=Populus trichocarpa GN=POPTRDRAFT_642406 PE=4 SV=1	-	-	-	-	-	-	-	-	-	-	-
50	CotAD_04637	locus=At_chr4:36817700:36821121:- [translate_table: standard]	54435.5	0.07	2|3|3	7|11|18	CotAD_69758;Cotton_D_gene_10025276/CotAD_69758;Cotton_D_gene_10025276/CotAD_69758;Cotton_D_gene_10025276	CotAD_04637	MAVLSATKLLIFFFFSCHLSIFSSTATAVYTIGVNYGTIADNLPTPAQVANFLKTKTNIDRIKIFDTNPDILKAFAGTGISVTVTVGNGDIPSLAKLPGAKAWIEKNILPYHPKTIIRYIAVGNEILATSDKTLIAHLLPAMKALRSALDSANATSVKVSTPHSLGILSTSEPPSAGKFRKGYDKLIFAPILEFHKQTKSPFMVNPYPYFGFKPQTLDYSLFKPNGGVFDAGTGINYTNMFDAQLDAVYTAMKRVGYEDVDLVVAETGWPSVGDPGQPGVSLENALSYNGNLIKHVDSGKGTPLMPNRTFETYIFALFNENLKESVPERNFGLFKPDLNPVYDVGILRTPTRATAPSAATAPSAGKAPSSGSGKWCVAKSNASDAALQANIDYVCSSGV…	70.32	0	gi|255584220|ref|XP_002532848.1|	Glucan endo-1,3-beta-glucosidase precursor, putative [Ricinus communis]	54.02	3e-162	sp|P52409|E13B_WHEAT	Glucan endo-1,3-beta-glucosidase OS=Triticum aestivum GN=GLC1 PE=2 SV=1	70.32	0	B9T3M9	B9T3M9_RICCO Glucan endo-1,3-beta-glucosidase, putative OS=Ricinus communis GN=RCOM_1165880 PE=3 SV=1	-	-	-	-	-	-	-	K19619|1|3e-88|291|crb:CARUB_v10012467mg|EC[not_get]!K15429|3|2e-59|214|pvu:PHAVU_003G176600g|EC[not_get]!K13098|5|5e-45|172|eus:EUTSA_v10012621mg|EC[not_get]	metabolic_process		binding catalytic_activity
51	Cotton_D_gene_10032020	locus=scaffold8:778104:780647:+ [translate_table: standard]	69609.5	0.09	-|-|3	-|-|12	-/-/CotAD_12400	Cotton_D_gene_10032020	MGKTSVLLVGFLFSFLVATVQAGDKYKKYNDPSLPINKRIRDLMRRMSLDEKIGQMVQIDRKVATPEVMRDYKIGSILSGGGSVPHLQATPQEWLNMVNGFQNGSLSTRLGIPMIYGIDAVHGHNNVYKATIFPHNIGLGATRDPELVKRIGSATAREVRATGINYVFAPCIAVCRDPRWGRCFESYSEDPDIVKEMTEIINGLQGEIPKDSRKGVPYVGGKDKVVACAKHFVGDGGTTRGINENNTVIDKHGLLSIHMPGYNAAIIKGVGTVMVSYSSWNGVKMHANHDLVTNFLKGALRFRGFVISDWQAIDRMTYPVHANYTYSVLTGVQAGLDMIMVPYNYTEFIDTLTGLVKNKFIPMSRIDDAVRRILRVKFQLGLFENPLSDESFIDQLGHQ…	75.29	0	gi|462400740|gb|EMJ06297.1|	hypothetical protein PRUPE_ppa014607mg [Prunus persica]	33.08	6e-85	sp|Q23892|GLUA_DICDI	Lysosomal beta glucosidase OS=Dictyostelium discoideum GN=gluA PE=1 SV=2	76.95	0	F6H5Z0	F6H5Z0_VITVI Putative uncharacterized protein OS=Vitis vinifera GN=VIT_14s0036g01040 PE=4 SV=1	BH1908	137	4e-33	COG1472	Beta-glucosidase-related glycosidases	G	Carbohydrate transport and metabolism ;	K01188|1|0.0|1004|tcc:TCM_041165|EC[not_get]!K05349|2|0.0|953|pmum:103343343|EC[not_get]	-	-	-
52	Cotton_D_gene_10033427	locus=scaffold104:4025320:4028185:+ [translate_table: standard]	55827.2	0.354	1|1|-	1|1|-	-/-/-	Cotton_D_gene_10033427	MARSVCVWFALAAIVCSLSAISAEESSEAKEFVLTLDHSNFTDTVSKHDFIVVEFYAPWCGHCKHLAPEYEKAASILSKHDPPIFLAKVDADDEANKDLASQYDVKGYPTLQILRNGGKNVQEYKGPREADGIVEYLKKQSGPASVEIKLTEDASNLIDDKKIVIVGVFPKFSGEEFESYMALAEKLRSDYDFGHTLDAKHLPRGESSVVGPLVRLFKPFDELVVDFKDFKPEALEKFIEESSIPLVTLFNKDPSNHPFVAKFYNSPNAKAMLFADLSTEGFDSLQSKYREVAEQYKGKGISFLLGDVEASQAAFQYFGVEESQVPLIIIQSDDGKKYFKPNLKADDIAPWVKDFKEGKVAPYVKSEPIPKENNEPVKVVVADTLEDMVFKSGKNVLLE…	100	0	gi|133902301|gb|ABO41832.1|	putative protein disulfide isomerase [Gossypium raimondii]	73.73	0	sp|Q43116|PDI_RICCO	Protein disulfide-isomerase OS=Ricinus communis PE=2 SV=1	100	0	A4L9G4	A4L9G4_GOSRA Putative uncharacterized protein OS=Gossypium raimondii PE=3 SV=1	VNG6073G	62	3e-11	COG0526	Thiol-disulfide isomerase and thioredoxins	OC	Posttranslational modification, protein turnover, chaperones ; Energy production and conversion ;	K09580|1|0.0|877|tcc:TCM_035146|EC[not_get]	biological_regulation cellular_process metabolic_process single-organism_process	cell cell_part organelle organelle_part	catalytic_activity
53	CotAD_50829	locus=At_chr11:29773083:29777220:+ [translate_table: standard]	56723.4	0.069	1|1|1	1|1|1	CotAD_29411;Cotton_D_gene_10026434/CotAD_29411;Cotton_D_gene_10026434/CotAD_29411;Cotton_D_gene_10026434	CotAD_50829	MDGNRQPGSPSSEMWLHNTMSKKKELFKPKVEDKVGMYVCGVTAYDLSHIGHARVYVTFDVLYRYLKHLGYEVCYVRNFTDVDDKIIARANELAEDPISLSRRYCDEFIQDMVHLQCLPPSVEPRVSDHMPHIIDMIKQIVDNGYAYRVEGDVFFSVENFPEYGQLSGRKLEDNRAGERVASAKEGEPFWESPWGPGRPGWHIECSAMSAAYLGYSFDIHGGGMDLVFPHHENEIAQSCAACKQSNVSYWIHNGFVTVDSEKMSKSLGNFFTIREVINLYHPLALRLFLMGTHYRSPINYSDVLLESASERIFYIYQTLHDCENVLSQHDKGLQESIPPETLNVINKFHNDFSTSMSDDLHTPVVLAALSDPLKTINDLLHTRKGKKQATRIESVAALE…	81.34	0	gi|224141927|ref|XP_002324312.1|	predicted protein [Populus trichocarpa]	47.31	5e-155	sp|B3E1P0|SYC_GEOLS	Cysteine--tRNA ligase OS=Geobacter lovleyi (strain ATCC BAA-1151 / DSM 17278 / SZ) GN=cysS PE=3 SV=1	81.34	0	B9IL05	B9IL05_POPTR Predicted protein OS=Populus trichocarpa GN=POPTRDRAFT_809135 PE=3 SV=1	SA0488	347	1e-114	COG0215	Cysteinyl-tRNA synthetase	J	Translation, ribosomal structure and biogenesis ;	K01883|1|0.0|944|tcc:TCM_019993|EC[not_get]	cellular_process metabolic_process single-organism_process	cell cell_part	binding catalytic_activity
54	Cotton_D_gene_10010589	locus=scaffold275:802268:804125:- [translate_table: standard]	23337.5	0.208	3|4|4	18|14|21	CotAD_04014;CotAD_55779/CotAD_04014;CotAD_55779/CotAD_04014;CotAD_55779	Cotton_D_gene_10010589	MAMSMAIATDCGSSRWSMASLKSALPRLTSTASSIKLPCRRRAPPPVKSPQLVRSFTALSPVNPLHSLGFSGLTSFEQNFTIIDNGGRFYAMRHGRRVPKLNRPPDQRRALLRGLTTQLLKYGRIKTTRARASAVRKYVDKMITLAKDGSLHKRRQALGFIYEKQIVHALFAEVPERYGERNGGYTRIIRTLPRRGDNAPMAYIELV	75.36	2e-103	gi|15232448|ref|NP_190989.1|	50S ribosomal protein L17 [Arabidopsis thaliana]	75.36	7e-104	sp|Q9M385|RK17_ARATH	50S ribosomal protein L17, chloroplastic OS=Arabidopsis thaliana GN=RPL17 PE=2 SV=1	70.67	9e-102	A9PC28	A9PC28_POPTR Putative uncharacterized protein OS=Populus trichocarpa PE=2 SV=1	ZrplQ	95.9	6e-25	COG0203	Ribosomal protein L17	J	Translation, ribosomal structure and biogenesis ;	K02879|1|1e-131|370|tcc:TCM_025624|EC[not_get]	metabolic_process	cell cell_part macromolecular_complex organelle	structural_molecule_activity
55	Cotton_D_gene_10001946	locus=scaffold415:171846:173810:- [translate_table: standard]	74243.2	0.038	1|-|-	1|-|-	CotAD_40133/-/-	Cotton_D_gene_10001946	MASFGIWVLTIFLVFQSGYGFYLPGSYPHKYKVGDPLSVKVNSLTSIDTEMPFSYYSLPFCKPAEGVKDSAENLGELLMGDRIENSPYRFKMYTNETLIFLCQSGKLSADEFKLLKERIDEMYQVNLILDNLPAIRYTVKEGFVSRWTGYPIGVKFQDMYYVFNHLKFKVLVHKYEETNVARVMGTGDAVDVFPSGGKGGSDVPGYMVVGFEVIPCSVMHNGNVVKDLKMYDKYPSEIKCDTTTVTVPIKEGEPFVFTYEVAFEESDIKWPSRWDAYLKMEGSKVHWFSILNSLMVITFLAGIVLVIFLRTVRRDLTRYEELDKEAQAQMNEELSGWKLVVGDVFRAPSHPALLCIMVGDGVQILGMGVVTILFAALGFMSPASRGTLITGMLFFYMIL…	88.21	0	gi|255565099|ref|XP_002523542.1|	Endosomal P24A protein precursor, putative [Ricinus communis]	40.9	4e-154	sp|A5D7E2|TM9S4_BOVIN	Transmembrane 9 superfamily member 4 OS=Bos taurus GN=TM9SF4 PE=2 SV=2	88.21	0	B9SC23	B9SC23_RICCO Endosomal P24A protein, putative OS=Ricinus communis GN=RCOM_0701700 PE=4 SV=1	-	-	-	-	-	-	-	K17086|1|0.0|1137|cic:CICLE_v10007695mg|EC[not_get]		cell cell_part membrane membrane_part organelle
56	CotAD_22190	locus=Dt_chr11:3834475:3836290:+ [translate_table: standard]	34543.3	0.027	1|-|-	1|-|-	CotAD_41244;Cotton_D_gene_10031310;Cotton_D_gene_10033781/-/-	CotAD_22190	MDFSHLNRGQMTLMGSAFCVVLSLHFTLQLVSQHLFYWKNPKEQKAILIIILMAPIYAAVSFVGLLDIRGSKAFFMFLESVKECYEAFVIAKFMALMYSYLNISISKNIVPDEIKGREIHHSFPMTLFQPRTVRLNHHTLKLLKYWTWQFVVIRPVCSVLMITLQLLQFYPSWLSWTFTIILNVSVSLALYSLVAFYHVFAKELEPHKPLAKFLCIKGIVFFCFWQGVVLDILVAVGIIRANHFWLDVEHLEEALQNVLVCLEMVVFAVLQQYAYHVYPYSGETEAKLKLGKKLE	86.69	0	gi|255560832|ref|XP_002521429.1|	conserved hypothetical protein [Ricinus communis]	32.48	4e-39	sp|Q17QL9|T184C_BOVIN	Transmembrane protein 184C OS=Bos taurus GN=TMEM184C PE=2 SV=1	86.69	0	B9S610	B9S610_RICCO Putative uncharacterized protein OS=Ricinus communis GN=RCOM_1062980 PE=4 SV=1	-	-	-	-	-	-	-	-	-	-	-
57	CotAD_10243	locus=scaffold251.1:492398:495952:+ [translate_table: standard]	65492.6	0.033	-|1|1	-|1|1	-/-/-	CotAD_10243	MASLSRATLRASTPLPPDHHKRALIAAPKSVYQRIFRRSRTSLTVVRAVDGDNSYLGMWRKAVEREKKEAEFQKLTQNLAKTDDDSGGGNGEKKEVIEKKSKEFQKILETPKEERDQIQRMQVIDRAAAAIAAARSLIGNKDSSRKDDSNNKNRNSIRVQEDGKQDGSIFVTRPENSGNGTPGPDFWSWTPPSSNDQISDEVDVLQAARQTSEYPISSNPVLEKERSVGILSIPFESKAYETTRNLPPFQSLLEVDKTKASEVDVDEISVKEERDLEVEFSAHAAEAADALHKAKELSSQGVNQDGTRWWIETGIEQRPDGVICRWTMIRGVSADQAVEWQEKYWEASDEFDYKELGSEKSGRDVFGNVWSERWRESMLQDSGLAHLEKTADKWGKNAN…	60.31	0	gi|225432848|ref|XP_002279944.1|	PREDICTED: uncharacterized protein LOC100256346 [Vitis vinifera]	-	-	-	-	59.76	0	F6HDV8	F6HDV8_VITVI Putative uncharacterized protein OS=Vitis vinifera GN=VIT_05s0020g04440 PE=4 SV=1	-	-	-	-	-	-	-	-	-	-	-
58	Cotton_D_gene_10036881	locus=scaffold52:2029387:2030991:+ [translate_table: standard]	28927.4	0.243	1|1|1	2|1|2	Cotton_D_gene_10038241/Cotton_D_gene_10038241/Cotton_D_gene_10038241	Cotton_D_gene_10036881	MVTLSTPLSHNSLSSPRISTKRHGCPLHQPMYLSESPVLLLLESNSHYVGKSQLSVMSSVQVMFWASKCVPKSKESSSPFKELRTVACGFLAVCTVATASPVIAANQRLPPLSTEPNRCERAFVGNTIGQENGVYDKPLDLRFCNYTNEKLNLKGKSIAAALMSDARFDGADMSEAVMSKAYAVGASFKGTDFSNAVLDRADFRKANLQGAIFKNTVLSGSTFDNAQLEDAVFEDTIIGYIDIQKLCTNTSISAEGRVELGCR	84.53	4e-111	gi|359490718|ref|XP_002275994.2|	PREDICTED: thylakoid lumenal 17.4 kDa protein, chloroplastic [Vitis vinifera]	72.93	1e-96	sp|P81760|TL17_ARATH	Thylakoid lumenal 17.4 kDa protein, chloroplastic OS=Arabidopsis thaliana GN=At5g53490 PE=1 SV=2	84.53	6e-110	E0CV77	E0CV77_VITVI Putative uncharacterized protein OS=Vitis vinifera GN=VIT_16s0098g01540 PE=4 SV=1	CC0587	47.8	8e-06	COG1357	Uncharacterized low-complexity proteins	S	Function unknown ;	-	-	-	-
59	CotAD_43747	locus=Dt_chr2:29703172:29703369:- [translate_table: standard]	7523.09	0.385	3|1|1	18|1|4	Cotton_D_gene_10020492;CotAD_14594;Cotton_D_gene_10006200;CotAD_33726;CotAD_17145;Cotton_D_gene_10002595;CotAD_58935/Cotton_D_gene_10020492;CotAD_14594;Cotton_D_gene_10006200;CotAD_33726;CotAD_17145;Cotton_D_gene_10002595;CotAD_58935/Cotton_D_gene_10020492;CotAD_14594;Cotton_D_gene_10006200;CotAD_33726;CotAD_17145;Cotton_D_gene_10002595;CotAD_58935	CotAD_43747	MDSQIKFAVVVKIMGRTGSRGQVTQVRVKFLDDQNRFIMRNVKGPVREGDILTLLESEREARRLR	96.08	3e-28	gi|224100565|ref|XP_002311925.1|	predicted protein [Populus trichocarpa]	88.24	1e-26	sp|P46302|RS28_MAIZE	40S ribosomal protein S28 OS=Zea mays GN=RPS28 PE=3 SV=1	96.08	4e-27	A9P8N1	A9P8N1_POPTR Predicted protein OS=Populus trichocarpa GN=POPTRDRAFT_725361 PE=4 SV=1	ECU09g1275	57	2e-12	COG2053	Ribosomal protein S28E/S33	J	Translation, ribosomal structure and biogenesis ;	K02979|1|6e-29|100|cit:102622872|EC[not_get]	metabolic_process	cell cell_part macromolecular_complex	structural_molecule_activity
60	CotAD_22111	locus=Dt_chr9:32205249:32205932:+ [translate_table: standard]	25498.5	0.3	2|2|2	6|5|2	Cotton_D_gene_10027681/Cotton_D_gene_10027681/Cotton_D_gene_10027681	CotAD_22111	MEIALLSFPSPKPPLSQTLTLKPTAPFLRPSKPNLPSFRPSPFPSIRAAISRTKKEETVETVKTQLENCYLLAAVEYKGFTVQQFQDLRRSLPETSKLLVAKNTLVLKAIEGTKWEALKPCMKGMNAWLFVHTEEIPDAIKPYRTFQREKKLENDFTGAVFEGKFYGPGDFKQLENMPTRAEVYAKLLGSLQSPAIGLVSTLQAPARDVVMVLKAYVKKLEEESGGN	76.33	2e-105	gi|224112933|ref|XP_002316337.1|	predicted protein [Populus trichocarpa]	74.16	2e-98	sp|O80362|RK10_TOBAC	50S ribosomal protein L10, chloroplastic OS=Nicotiana tabacum GN=RPL10 PE=2 SV=1	76.33	2e-104	B9HU05	B9HU05_POPTR Predicted protein OS=Populus trichocarpa GN=POPTRDRAFT_1092314 PE=3 SV=1	BU036	55.1	5e-09	COG0244	Ribosomal protein L10	J	Translation, ribosomal structure and biogenesis ;	K02864|1|1e-116|335|tcc:TCM_043044|EC[not_get]	cellular_component_organization_or_biogenesis metabolic_process	cell cell_part macromolecular_complex organelle	binding
61	Cotton_D_gene_10004216	locus=scaffold286:291566:295134:+ [translate_table: standard]	60174.9	0.03	-|1|-	-|1|-	-/CotAD_30545/-	Cotton_D_gene_10004216	MEKAASFLFAGTIFNKKKYADEIARFKEKKETENEVDYLSSFERVNPGSEEVTVSTKKRKRKQAASEAVEGFNVFKSSKKALVISEENKTDEGEDNLSKEKKKINLKLEADSILRKQYNIHVSGNKVASPLKSFADLSSVYGCESYLLHNFAKLGFKEPTPIQRQAIPVLLSGRECFACAPTGSGKTLAFVSPMLMKLKHASTEGVRAVILCPTRELAAQTTRECKKLAEGNKFYIKLLTKKLIRSAHLTKLRCDILISTPLRLSSAIKKRKLDLSRVEYLVLDESDKLFELGLIKQIDSVVKACSNPSIIRSLFSATLPDSVEELARTIMHDAVRVIIGRKNTASESVNQKLVFAGTEEGKLLALRQSFQERLNPPVLIFVQSKERAKELYEELKFDN…	76.28	0	gi|225439904|ref|XP_002279705.1|	PREDICTED: DEAD-box ATP-dependent RNA helicase 57 [Vitis vinifera]	70.11	0	sp|Q84TG1|RH57_ARATH	DEAD-box ATP-dependent RNA helicase 57 OS=Arabidopsis thaliana GN=RH57 PE=2 SV=1	76.28	0	F6HR01	F6HR01_VITVI Putative uncharacterized protein OS=Vitis vinifera GN=VIT_08s0040g02300 PE=4 SV=1	AGc3366	214	1e-62	COG0513	Superfamily II DNA and RNA helicases	LKJ	Replication, recombination and repair ; Transcription ; Translation, ribosomal structure and biogenesis ;	K14779|1|0.0|973|tcc:TCM_022104|EC[not_get]			binding catalytic_activity
62	CotAD_45183	locus=At_chr5:635423:638461:+ [translate_table: standard]	78223.4	0.038	-|1|2	-|3|6	-/-/-	CotAD_45183	MVAFGKKLKERQIQEWQGFYLNYKLMKKRVKQYAQQMEVGTQDRRHVLKDFSRMLDNQIEKTVLFILEQQGQLASRLTNLREQHDALEETPEISQITELREAYRAVGLDLLKLLYFVEMNAIGLRKILKKFDKRFRYRFTDYYVKTRANHPYSQLQQVFKHVGLGAVVGAISRNLHELQDRQGSYLSIYDPPALPLQDPVVDSINAAVDRLSHSTNFLNFLAQHALIMQEELPAPTDERIDDERYHFMSLLLNLANTFLYMVNTYIIVPTADDYSMSLGAAATVCGIVIGAMAVAQVFSSVYFSAWSNRSYFRPLVFSSIVLFVGNTMYALAYDMNSLTVLILGRLFCGLGSARAVNRRYISDCVPLKIRMQASAGFVSASALGMACGPALAGILQTNF…	84.1	0	gi|225426757|ref|XP_002282540.1|	PREDICTED: SPX domain-containing membrane protein At4g22990 [Vitis vinifera]	80.71	0	sp|Q93ZQ5|SPXM3_ARATH	SPX domain-containing membrane protein At4g22990 OS=Arabidopsis thaliana GN=At4g22990 PE=2 SV=2	84.1	0	D7TW83	D7TW83_VITVI Putative uncharacterized protein OS=Vitis vinifera GN=VIT_02s0025g04540 PE=4 SV=1	YFL004w_1	50.4	9e-06	COG5036	SPX domain-containing protein involved in vacuolar polyphosphate accumulation	P	Inorganic ion transport and metabolism ;	-	localization
63	Cotton_D_gene_10009188	locus=scaffold175:48947:50806:- [translate_table: standard]	70039.3	0.084	-|3|4	-|9|10	-/CotAD_13916;CotAD_72071/CotAD_13916;CotAD_72071	Cotton_D_gene_10009188	MASFFLNPLLYLLPLLFLDPLFSQANLHHSKTFKSSLFFQSSANETISPTLYFEVTKPINLPATRPCSLTVLQHDFGFTYGKPPVLADYNFPSDCPFQEFSKIVLEWNATCKGRQFDRIFGVWLSGVELLRSCTAEPRPNGIFWSVKKDITRYSSLLLSNDTQTFAVYLGNIVDKTYTGVYHVNVTLYFYPAVEKPVLSKEKWGDFGSEVDSKADLIIPFSRDMPLNDGLWYEIENATDVKVKEFVIPQNVYRAVLEVYVSFHENDEFWYGNLPNEYIAANNLTDVAGNGPFREVVVSLDGEVVGAVWPFTVVYTGGINPLLWRPVSAIGSFDLPTYDIEITPFLGNLLNGKPHKLSFSVTNALNVWYIDANLHLWIDSKSAKTEGKLLQYDIVPLSVT…	64.85	0	gi|224114784|ref|XP_002316856.1|	predicted protein [Populus trichocarpa]	66.84	0	sp|P81898|PNAA_PRUDU	Peptide-N4-(N-acetyl-beta-glucosaminyl)asparagine amidase A OS=Prunus dulcis PE=1 SV=2	64.85	0	B9I1T4	B9I1T4_POPTR Predicted protein OS=Populus trichocarpa GN=POPTRDRAFT_1094130 PE=4 SV=1	-	-	-	-	-	-	-	K01599|1|0.0|566|crb:CARUB_v10015606mg|EC[not_get]			catalytic_activity
64	CotAD_46274	locus=Dt_chr8:34422166:34423808:- [translate_table: standard]	48018.2	0.076	1|1|1	4|2|2	-/-/-	CotAD_46274	MATAFSPSKFAAQPFPLNTTSQNNPLTIPTTASPFLGSTRKLIRLSSSSNLNIRRRSGTVVAVSDVVKENKSKSTLNLLITKEEGLELYEDMVLGRALGRAFEDMCAQMYYRGKMFGFVHLYNGQEAISTGFIKLLKQQDSVVSTYRDHVHALSKGVSARAVMSELFGKTTGCCRGQGGSMHMFSREHNVLGGFAFIGEGIPVATGAAFTSKYKREVLKEADCDHVTLAFFGDGTCNNGQFFECLNMAALWKLPIVFVVENNLWAIGMSHLRATSDPQIYKKGPAFGMPGVHVNGMDVLKVREVAKEAIGRARRGEGPTLVECETYRFRGHSLADPDELRDPAEKAHYAARDPITALKKYLIENSLASEADLKAIDKKIDEVVEEAVEFADESPVPPRS…	84.05	0	gi|255548035|ref|XP_002515074.1|	pyruvate dehydrogenase, putative [Ricinus communis]	80.09	0	sp|O24457|ODPA3_ARATH	-	84.05	0	B9RNK3	B9RNK3_RICCO Pyruvate dehydrogenase, putative OS=Ricinus communis GN=RCOM_1339660 PE=4 SV=1	SSO1369	206	3e-62	COG1071	Pyruvate/2-oxoglutarate dehydrogenase complex, dehydrogenase (E1) component, eukaryotic type, alpha subunit	C	Energy production and conversion ;	K00161|1|0.0|745|tcc:TCM_005037|EC[not_get]	metabolic_process single-organism_process	organelle	catalytic_activity
65	CotAD_38787	locus=scaffold1977.1:265665:267024:- [translate_table: standard]	23440	0.044	1|-|-	1|-|-	-/-/-	CotAD_38787	MVFLCWARPSPEQQKSCINKSGALNYDTKYKGATSKPVSCIKEDKELSKDGYLINHARVLIGSGFETYEKGKTALQNWKHFGLDWAFVDPKTPIQNGVKFCVCLKEFLPWVIMPLQVVYVNENTRAKTKKSLASFGFGSGTLQGHLLAGEERFTIELDENDQVWYEVLSFSKPAHFLSIIGYPYVQLRQKYFAHQSANAVLKHL	75	2e-119	gi|462398630|gb|EMJ04298.1|	hypothetical protein PRUPE_ppa023767mg [Prunus persica]	68.14	9e-109	sp|Q8GXB1|U548_ARATH	UPF0548 protein At2g17695 OS=Arabidopsis thaliana GN=At2g17695 PE=2 SV=1	74.51	1e-113	B9MX87	B9MX87_POPTR Predicted protein OS=Populus trichocarpa GN=POPTRDRAFT_741193 PE=4 SV=1	MT2691.1	60.1	5e-11	COG4762	Uncharacterized protein conserved in bacteria	S	Function unknown ;	-	-	-	-
66	Cotton_D_gene_10023411	locus=scaffold117:1713368:1716673:+ [translate_table: standard]	65671.7	0.022	-|1|-	-|1|-	-/CotAD_64656/-	Cotton_D_gene_10023411	MAAFVGAVKLFISLVLWLNTLSSIQGARDFYEFRYPFIKRASSFSSSSSFSSSSNDEVTYDYIIVGGGTAGCPLAATLSQNFSVLLLERGGVPFSNANVSFLRNFHIALADTSPTSASQPFVSTDGVINARARVLGGGTCINAGFYTRANSDFIRRVGWDARLVNESYPWVEKQIVHQPKLAPWQDAFKDSLLDVGVSPYNGFTYDHIYGTKVGGTIFDRFGRRHTAAELLASANPKMLTVLVYATVQKVLFDKSAGKRPKAMGVMFKDENGNQHQAFLTNNRRSEVILSCGAIGTPQLLMLSGIGPKAELQRLNISMVLHNEFVGKGMADNPMNSVFVPMTRSVEQSLIQTVGITKMGVYIEASSGFGQSQDSIHCHHGLLSAEIGQLSTVPPKQRTR…	78.05	0	gi|224128496|ref|XP_002329018.1|	predicted protein [Populus trichocarpa]	70.39	0	sp|Q9S746|HTH_ARATH	Protein HOTHEAD OS=Arabidopsis thaliana GN=HTH PE=1 SV=1	78.05	0	B9N187	B9N187_POPTR Predicted protein OS=Populus trichocarpa GN=POPTRDRAFT_827575 PE=3 SV=1	AGpT129	90.1	2e-18	COG2303	Choline dehydrogenase and related flavoproteins	E	Amino acid transport and metabolism ;	K15403|1|0.0|1107|tcc:TCM_029058|EC[not_get]	metabolic_process single-organism_process		binding catalytic_activity
67	CotAD_64056	locus=scaffold3586.1:25714:29072:+ [translate_table: standard]	110192	0.016	-|1|-	-|2|-	-/Cotton_D_gene_10033718/-	CotAD_64056	MLLLFFSFLFFTFPSPSLSLNQEGLYLLQVKASLSDPDSVLSSWNPRDPTPCNWRGVSCDSATGYVTSLDLSNANVAGPFPSLLCRLQNLSFVNFFYNNINSTIPPDISTCQNLVHLDLAQNLLTGQLPHTLADLPNLKYLDFTGNNISGDFPESFGRFQKLEVLSLVYNLLDGTIPAFLGNISTLRMLNLSYNPFSPGRIPPELGNLTNLEILWLTECNLAGEIPDSLGRLKKLTDLDLALNHLVGNIPSSLTELASVVQIELYNNSLTGELPRGFSKLTNLRLLDASMNQLTGTIPDELTQLPLESLNLYQNNFEGTLPSSIADSPALYELRLFQNRLTGELPQNLGKNSPLIWLDVSSNQFTGPIPPSLCEKGSLEELLMIHNSFSGQIPSSLAEC…	77.82	0	gi|255536713|ref|XP_002509423.1|	protein with unknown function [Ricinus communis]	72.86	0	sp|Q9SGP2|HSL1_ARATH	Receptor-like protein kinase HSL1 OS=Arabidopsis thaliana GN=HSL1 PE=2 SV=1	77.82	0	B9RB89	B9RB89_RICCO Putative uncharacterized protein OS=Ricinus communis GN=RCOM_1673170 PE=3 SV=1	RSp0875	80.5	1e-14	COG4886	Leucine-rich repeat (LRR) protein	S	Function unknown ;	K00924|1|0.0|1723|tcc:TCM_029800|EC[not_get]	cellular_process metabolic_process	membrane membrane_part	binding catalytic_activity
68	Cotton_D_gene_10025420	locus=scaffold124:701785:703213:- [translate_table: standard]	24535	0.146	2|2|1	4|2|4	Cotton_D_gene_10025419;CotAD_04696;Cotton_D_gene_10021467;CotAD_64288;Cotton_D_gene_10025219/Cotton_D_gene_10025419;CotAD_04696;Cotton_D_gene_10021467;CotAD_64288;Cotton_D_gene_10025219/Cotton_D_gene_10025419;CotAD_04696;Cotton_D_gene_10021467;CotAD_64288;Cotton_D_gene_10025219	Cotton_D_gene_10025420	MYRDQFLTEEIDGSPWKSIEKAIGNFGKKQSIEDVLRQQIEKQDYYDEGSGQNPPRGGGGGSSGGGDGFGESEDEGLSGFLDETMQVILATLGFIFLYVYIITGEELARLAKDYIKYLFGGSKSVQLKRTMHKWSQFFEKLTEKKEYDKFWLEKAIITTPTWYDSPDKYRRVLNSYIEYDDEDESDTNTKSESYKCLKELNEKLFFHENVIH	64.67	8e-57	gi|462420658|gb|EMJ24921.1|	hypothetical protein PRUPE_ppa010407mg [Prunus persica]	-	-	-	-	58.39	1e-52	B9MTF6	B9MTF6_POPTR Predicted protein OS=Populus trichocarpa GN=POPTRDRAFT_809857 PE=4 SV=1	-	-	-	-	-	-	-	-		cell cell_part organelle organelle_part
69	CotAD_57377	locus=scaffold4744.1:10546:11967:- [translate_table: standard]	54111.4	0.013	-|1|-	-|1|-	-/CotAD_48319;Cotton_D_gene_10027990;Cotton_D_gene_10013745/-	CotAD_57377	MKGGPMLTLSTIQGAIEPLTDIYEFKTKETTEGERSLSFYIVKTDRNFLIFDLINGKESVVFEGERYVIDLCDKDPVGDTVEKYVEAKHQMFDRTKVFHHQEVTGALRINRCLDIALAGTGLTYTVIGEFKSRDFENYGRALAQDMLKQIKNRFGVEYRVQGTHLTIAQEIARYTDGQARHAHNIRSISESIDVADLATYIEGYGKPVEDEEGNPIPGQWRATAKYLSPNAHLYERVIHAEYVYDDRFVHDESLLEYIISRLKDVPGYYLKIEYAELVKNGLKLHDYRLGDYIYILHEVMNIKIQARIISIERYPLEPGRSPVIELGSFKKDITVMTANLQNQDKRVQAIENTVQGVNQSIGIVRTTAQEAKKLAQSGSGDISTHTANQLIHVSPDDRD…	-	-	-	-	-	-	-	-	49.55	5e-137	Q5WE58	Q5WE58_BACSK Phage-related protein OS=Bacillus clausii (strain KSM-K16) GN=ABC2818 PE=4 SV=1	-	-	-	-	-	-	-	-	-	-	-
70	CotAD_41258	locus=At_chr7:5146815:5149622:+ [translate_table: standard]	58026.1	0.078	2|3|-	5|7|-	-/-/-	CotAD_41258	MAGGGVIGVGGGGGGDGRKPYPGNLTPYVTITCIVAAMGGLIFGYDIGISGGVTTMTPFLQKFFRKVWEKKEADKSTNQYCQYDSQTLTMFTSSLYLAALLSSLVASTVTRRLGRKLSMLFGGLLFFAGALINGFAKAVWMLIVGRMLLGFGVGFANQSVPLYLSEMAPYKYRGALNIGFQLSITVGILIANVLNYFFAKIKGGWGWRLSLGGAMVPALIITVGSLVLPDTPNSMIERGQTEEARAKLKKIRGVDDVDEEFKDLVAASDASKLVHHPWTNLLQRKYRPHLTMAILIPFFQQLTGINVIMFYAPVLFNTIGFGDDASLMSAVITGIVNVGATLVSIYGVDKWGRRFLFLEGGVQMLICQAVVAACIGAKFGVSGNPGDLPKWYAITVVLF…	85.49	0	gi|215271818|emb|CAN87006.1|	hexose transporter 1 [Hevea brasiliensis]	85.1	0	sp|Q41144|STC_RICCO	Sugar carrier protein C OS=Ricinus communis GN=STC PE=2 SV=1	85.49	0	B7FCC1	B7FCC1_HEVBR Hexose transporter 1 OS=Hevea brasiliensis GN=hxt1 PE=2 SV=1	Ta0048	52.8	9e-07	COG0477	Permeases of the major facilitator superfamily	GEPR	Carbohydrate transport and metabolism ; Amino acid transport and metabolism ; Inorganic ion transport and metabolism ; General function prediction only ;	K08150|1|4e-49|179|sot:102593131|EC[not_get]	localization metabolic_process	membrane membrane_part	catalytic_activity transporter_activity
71	CotAD_69944	locus=scaffold3627.1:60719:61141:- [translate_table: standard]	16017.3	0.079	-|1|-	-|1|-	-/Cotton_D_gene_10004316;CotAD_47681/-	CotAD_69944	MAEKLFHEMGENGYTPDSYTYRVMIDGFCKTGRVDSGYDFLLEKVTKGFIPSLTTFGRVINCLCVENRVNNAVGLIHLMVKKDIVPEIVNTIFESNKKEIAAPKIVVEDLLKKGHITYYAYDLLHDGVRDKKLLKKLQSG	74.64	2e-69	gi|462407017|gb|EMJ12481.1|	hypothetical protein PRUPE_ppa002983mg [Prunus persica]	68.38	2e-57	sp|Q9CA58|PP120_ARATH	Putative pentatricopeptide repeat-containing protein At1g74580 OS=Arabidopsis thaliana GN=At1g74580 PE=3 SV=1	75	1e-67	D7SIC2	D7SIC2_VITVI Putative uncharacterized protein OS=Vitis vinifera GN=VIT_17s0000g06090 PE=4 SV=1	-	-	-	-	-	-	-	K17964|1|1e-59|201|gmx:100811379|EC[not_get]	-	-	-
72	CotAD_39551	locus=Dt_chr1:59499294:59501663:- [translate_table: standard]	24906.3	0.345	2|1|-	5|2|-	-/-/-	CotAD_39551	MPKEQANWSPYDNNGGSCVAVAGADYCVIAADTRMSTGYNILTRDYSKICKLADKCVMASSGFQADVKALQKHLAARHLIYQHQHNKQMSCPAMAQLLSNTLYYKRFFPYYSFNVLGGLDNEGKGCVFTYDAVGSYEKVGYSSQGSGSTLIMPFLDNQLKSPSPLLLPARDAVTPLAEAEAIDLVKTVFASASERDIYTGDKLEIVVINADGIRREYMDLRKD	94.62	2e-161	gi|225453909|ref|XP_002279266.1|	PREDICTED: proteasome subunit beta type-1 [Vitis vinifera]	91.03	3e-155	sp|O82531|PSB1_PETHY	Proteasome subunit beta type-1 OS=Petunia hybrida GN=PBF1 PE=2 SV=1	94.62	2e-160	D7U7S6	D7U7S6_VITVI Proteasome subunit beta type OS=Vitis vinifera GN=VIT_15s0048g00900 PE=3 SV=1	MK1228	69.3	7e-14	COG0638	20S proteasome, alpha and beta subunits	O	Posttranslational modification, protein turnover, chaperones ;	K02732|1|8e-163|451|tcc:TCM_005507|EC[not_get]	metabolic_process	cell cell_part macromolecular_complex organelle	catalytic_activity
73	CotAD_63382	locus=At_chr12:87563356:87567536:+ [translate_table: standard]	103034	0.021	-|1|-	-|1|-	-/-/-	CotAD_63382	MERRGWEKSIRGVGAMSNRSEIEVFSDAATEFQDGESGWSTDIVSQADKALASAISFKDGEDFDILQSPRNSVDGSQNENPVPRSMPILPVGTPEHHDVGLSYSKDSEDKNGSASEVVSIEMETLKGISEESRKVNAGVSVAACSVGQATDANENEGSKFNENLSSALVLPSKHAGKLSETESISETRLDETSDISSKTSISGNCEHETDGKGNPGISFEENLMDAGLKSENAEDLISETALADKIVELEENSDNLALNTVIDDLLSKAESTNDKNVSTGTFELQTDVAQGTDSSIDVDSNEVNEKKEKEKESGYVLCSPDDIPVVDDAEIKLEGFKDHTRVNLPQSETLASKEIIVDKEDKVKDHVSQEKSNTFVSNPMDEEIAIEDSYKLSGNNEAI…	42.98	8e-62	gi|224069601|ref|XP_002303009.1|	predicted protein [Populus trichocarpa]	-	-	-	-	42.98	1e-60	B9GNE3	B9GNE3_POPTR Predicted protein OS=Populus trichocarpa GN=POPTRDRAFT_553093 PE=4 SV=1	-	-	-	-	-	-	-	-	-	-	-
74	Cotton_D_gene_10010093	locus=scaffold257:944527:945256:+ [translate_table: standard]	24215.6	0.151	3|1|2	7|2|6	CotAD_03274;CotAD_45334/CotAD_03274;CotAD_45334/CotAD_03274;CotAD_45334	Cotton_D_gene_10010093	MAIQLNHFQSSLLKQEKQPKPLFFTSSKTKNFGVNTAASSSGQQLIQSGEVKPILPKDAATALNSEGFKLLDIRPQWEREKAYVKGSLHVPLFVKDMDNSPITLLKKWVHFGYIGLWTGQNFTMINPNFVQEVEATLPDKDAKLLVACGEGLRSMMATSKLYEGGYKNLGWLAGGFNRAADSDFPEIEGPEKLQYATIGGVSYYFLQLLLLLQAVGKE	74.77	2e-115	gi|255574353|ref|XP_002528090.1|	conserved hypothetical protein [Ricinus communis]	56.72	5e-81	sp|Q9SR92|STR10_ARATH	Rhodanese-like domain-containing protein 10 OS=Arabidopsis thaliana GN=STR10 PE=2 SV=1	74.77	2e-114	B9SQ21	B9SQ21_RICCO Putative uncharacterized protein OS=Ricinus communis GN=RCOM_0643410 PE=4 SV=1	-	-	-	-	-	-	-	-	-	-	-
75	CotAD_12322	locus=At_chr1:9912208:9918925:+ [translate_table: standard]	139930	0.006	-|-|1	-|-|1	-/-/-	CotAD_12322	MFLNQISLHGSSTYFFFNHFPFLKLKPHQISLKHTQKNLQKYFIRNWRILRLDCLHTNAVSHSFDDLSIEEDEGNSKEVAFLHWMENRGIKANHQTFLWLLDGCLNSGSLEEGKKLHGKILKMGFSNEHFLSEKLMDIYIALGDLDGAIKVFDGMPKRNVFSWNKVISGFASNKMNDKVLGFYSRMVAENVNPNESTFASILKACTGSNVWFQYVEQIHARIIRDGFSFSSFVCNPLIDLYMKNGFIDSAKKLFDKLYVKDTVSWLAMISGLSQNGYEEQAILLFFEMHIAGILPTPYVFSSVLSACTKIEFFKLGEQLHSLVFKLGFSSETYVCNALVTLYSRSGNLVSAELIFSNTLLRDGVTYNSLISGLAQCGYSDRALELFERMQHDCLKPDCV…	73.24	0	gi|359482115|ref|XP_003632713.1|	PREDICTED: pentatricopeptide repeat-containing protein At4g13650-like [Vitis vinifera]	61.55	0	sp|Q9SVP7|PP307_ARATH	Pentatricopeptide repeat-containing protein At4g13650 OS=Arabidopsis thaliana GN=PCMP-H42 PE=2 SV=2	73.24	0	F6HLA9	F6HLA9_VITVI Putative uncharacterized protein OS=Vitis vinifera GN=VIT_08s0007g07510 PE=4 SV=1	mll1981	55.1	3e-07	COG1028	Dehydrogenases with different specificities (related to short-chain alcohol dehydrogenases)	IQR	Lipid transport and metabolism ; Secondary metabolites biosynthesis, transport and catabolism ; General function prediction only ;	K17710|1|1e-130|421|ppp:PHYPADRAFT_140042|EC[not_get]	-	-	-
76	CotAD_25215	locus=scaffold626.1:476749:479410:- [translate_table: standard]	37329	0.024	1|-|-	2|-|-	CotAD_06735;Cotton_D_gene_10026862;CotAD_06713;CotAD_31484;Cotton_D_gene_10039191/-/-	CotAD_25215	MQNQTEPPPETNSDKDDQAIEFDLSSTTALDLTSFQLHDLDSVELPSSLTELDLTANRLSKLDPRIANLINLRKLSFQQNLIDDAAIESISSWDSLSGLEELVLRDNKLMKVPDVSLFKKLLVFDVSFNEITSLHGMSKVSSTLKELYVSKNEVTKMEEIDHLHELQILELGSNRLRVMENLQNFTKLEELWLGRNRIKAINLCGLKYIKKISLQSNRLTSMIGLEECVALEELYLSHNGISKMEGLSTLVNLRVLDVSSNKLTSVNDVQNLTRLEDLWLNDNQIESLESVAEAVSGSREKLTTVYLENNPCENGVPEACPKSGMVMEGC	80.13	5e-178	gi|255546363|ref|XP_002514241.1|	protein phosphatases pp1 regulatory subunit, putative [Ricinus communis]	43.29	2e-59	sp|Q54Q39|PP1R7_DICDI	Protein phosphatase 1 regulatory subunit pprA OS=Dictyostelium discoideum GN=pprA PE=3 SV=1	80.13	7e-177	B9RKJ7	B9RKJ7_RICCO Protein phosphatases pp1 regulatory subunit, putative OS=Ricinus communis GN=RCOM_1050340 PE=4 SV=1	CAC3279_2	48.1	1e-05	COG4886	Leucine-rich repeat (LRR) protein	S	Function unknown ;	K17550|1|2e-178|499|rcu:RCOM_1050340|EC[not_get]	-	-	-
77	Cotton_D_gene_10037655	locus=scaffold54:2577219:2578374:+ [translate_table: standard]	36868.4	0.182	4|-|1	9|-|1	CotAD_44062/-/CotAD_44062	Cotton_D_gene_10037655	MYRFPWVLLLVAAVNMAVAAEPLRPGFYSETCPPAEFIVRDVMKKAMIREPRSLASVMRLQFHDCFVNGCDGSLLLDDTADMVGEKQALSNINSLRSFEVVDEIKEALEDACPSTVSCADILVLAARDAVALSGGPDWEVRLGRTDSLTASQQDSDNIMPSPRADATSLINLFAQFNLSVKDLVALSGSHSIGKARCFSIMFRLYNQSGSGKPDPAIEPEFREKLNQLCPLGVDENVTGPLDATPRVFDNQFFKDLVGGRGFLNSDQTLFTSRRTRPYVRVFSKDQDEFFKAFVEGMLKMGELQVEQPGEIRTNCRVVNGRPVDVLMSY	99.7	0	gi|315307494|gb|ADU04153.1|	gaiacol peroxidase [Gossypium hirsutum]	78.5	0	sp|Q9SJZ2|PER17_ARATH	Peroxidase 17 OS=Arabidopsis thaliana GN=PER17 PE=2 SV=1	99.09	0	Q8RVP6	Q8RVP6_GOSHI Gaiacol peroxidase OS=Gossypium hirsutum GN=pod1 PE=2 SV=1	-	-	-	-	-	-	-	K00430|1|0.0|530|tcc:TCM_001054|EC[not_get]	metabolic_process response_to_stimulus	cell cell_part	antioxidant_activity binding catalytic_activity
78	Cotton_D_gene_10017722	locus=scaffold167:230842:232210:- [translate_table: standard]	16600.1	0.142	2|2|2	6|6|10	CotAD_02599/CotAD_02599/CotAD_02599	Cotton_D_gene_10017722	MPQGKLQVVLVSAKGLENTDFLCNMDPYVLLTCRTQEQKSSVASGKGSEPEWNEDFIFNISEGASELALKIMDSDTGSQDDFVGEVAIPLEPVFIERNIPLTAYTVVKDGEYRGEIKLGLTFTPEERESRDFEVEESFGGWKQSSYTD	75	9e-72	gi|449452360|ref|XP_004143927.1|	PREDICTED: elicitor-responsive protein 3-like [Cucumis sativus]	64.83	4e-62	sp|Q0JBH9|ERG3_ORYSJ	Elicitor-responsive protein 3 OS=Oryza sativa subsp. japonica GN=ERG3 PE=2 SV=1	71.14	3e-67	A9PD47	A9PD47_POPTR Putative uncharacterized protein OS=Populus trichocarpa PE=2 SV=1	-	-	-	-	-	-	-	K05402|1|4e-13|66.6|pop:POPTR_0009s10070g|EC[not_get]!K12486|2|1e-10|60.8|bdi:100826243|EC[not_get]	-	-	-
79	Cotton_D_gene_10027797	locus=scaffold44:944894:947495:+ [translate_table: standard]	31719.3	0.085	-|2|-	-|3|-	-/-/-	Cotton_D_gene_10027797	MSVIDILTRVDVICKRYDKYDVEKQRDQNVSGGDAFARAYAAVEADIESALEKVELASKEKSKASAVAVNAEIRRTKARLLEEVPTLQRLAVKKVKGISTEEMAARNDLVLALPDRIQAIPDGTAATKQTGGWMSSAPSASRTAIKFDSDERFDNEYFQESEQSSQFRQEYEMRKMKQASMIYLLLLLTSMQDQGLDMISEGLDTLKNMAHDMNEELDRQVPLMDEIDTKVDKAAADLKNTNVRLKDTVTQLRSSRNFCIDIILLCIVLGIAAYLYNVLKK	82.27	2e-136	gi|255557036|ref|XP_002519551.1|	syntaxin, putative [Ricinus communis]	74.73	5e-121	sp|Q9SF29|SYP71_ARATH	Syntaxin-71 OS=Arabidopsis thaliana GN=SYP71 PE=1 SV=1	82.27	3e-135	B9S0N2	B9S0N2_RICCO Syntaxin, putative OS=Ricinus communis GN=RCOM_1356980 PE=4 SV=1	-	-	-	-	-	-	-	K08506|1|4e-122|352|aly:ARALYDRAFT_897138|EC[not_get]	-	-	-
80	CotAD_15084	locus=scaffold39.1:2618057:2639791:+ [translate_table: standard]	139403	0.054	2|1|3	5|4|6	-/-/-	CotAD_15084	MQGLCAEKTDSGGFSVSYLTSGERHSEEYCAMYDICGQRSDGKVLNCPYGSPSVKPDELFSAKIQSLCPSISGNVCCTEDQFNTLRAQVQXDDAQACLRNFLNLFCELSCSPNQSLFINVTSVSEINGNLTVDGIDFFVSDAFGEGLYDSCKEVKFGTMNTRAIQFIGAGATNFKEWFDFIGQKAPPGFPGSPYAIDFKSTVPDLSGMELMNVSTYSCGDTSLGCSCGDCPSSPQCSNSEPPSPSKKDHCSITIGPIKVRCIDFALAIAYIILVLGLFGWALFHRQRERILASDREPLLKSADEDESNLSNMQYDVNLALEGRGVTEQLKNGAQLSFIQGYMSSFYRSYGKWVARNPTLVLCLSLAVVIVLCFGLIRIEVETRPEKLWVGHGSKAAEEK…	79.51	0	gi|297744484|emb|CBI37746.3|	unnamed protein product [Vitis vinifera]	35.66	0	sp|P56941|NPC1_PIG	Niemann-Pick C1 protein OS=Sus scrofa GN=NPC1 PE=2 SV=1	79.51	0	F6I0S6	F6I0S6_VITVI Putative uncharacterized protein OS=Vitis vinifera GN=VIT_03s0038g03730 PE=4 SV=1	-	-	-	-	-	-	-	K12385|1|0.0|2050|tcc:TCM_006451|EC[not_get]	-	-	-
81	CotAD_66902	locus=scaffold4914.1:23298:25922:- [translate_table: standard]	95697.2	0.008	1|-|-	1|-|-	-/-/-	CotAD_66902	MQLVIVESPAKAKTIESYLGKDYRVLASYGHVRDLPPRDGSVDPDAGFAMEWEAYADKARQLKAITDEAKKADRLILATDPDREGEAISWHVQEVLRQKKALPKEVERVTFNAITKAAVTGAMARPRQLDEDLIDAYRARRALDYLVGFTLSPVLWRKLPGAKSAGRVQSVALRLVVEREREIEGFTAREYWSVTADMEHDGQPFQARLVRFEGEKIERLSIGDGGTAERARAAVEAGRFAVSSVETRPATRNPAPPFTTSTLQQEAARKLGFSASHTMRVAQSLYEAGAITYMRTDGVQMDESAISAARGAIAARYDAGYVPDKPRHYQTRAKNAQEAHEAIRPTDFGREKAGSGDEARLYDLVWRRALASQMASARLERTVVELVDGSGRHALRATG…	45.07	0	gi|384252302|gb|EIE25778.1|	DNA topoisomerase I [Coccomyxa subellipsoidea C-169]	72.29	0	sp|Q9X3X7|TOP1_ZYMMO	DNA topoisomerase 1 OS=Zymomonas mobilis (strain ATCC 31821 / ZM4 / CP4) GN=topA PE=3 SV=3	80.32	0	F3WU64	F3WU64_9SPHN DNA topoisomerase OS=Sphingomonas sp. S17 GN=topA PE=3 SV=1	CT643_1	430	1e-140	COG0550	Topoisomerase IA	L	Replication, recombination and repair ;	K03168|1|0.0|549|olu:OSTLU_41359|EC[not_get]	-	-	-
82	CotAD_44522	locus=At_chr9:43821241:43824117:+ [translate_table: standard]	57211.4	0.112	2|3|1	4|6|2	Cotton_D_gene_10033999;CotAD_13427/Cotton_D_gene_10033999;CotAD_13427/-	CotAD_44522	MGKESKSGGCLGWLLAIVILALVVGAIVYAVKQKMDHANDNKPSPVPGPPGAIDKKYADALKIAMQFFDIQKSGKLVNNKISWRGDSGLKDGNEANLDLSKGMYDAGDHMKFGFPMAFTATVLSWAILEYGDQMAAVNQLEPAQQSLKWITDFLINAHPKDNVLYIQVGDPDLDHKCWERPENMKEKRPLTQVNITVPGTEVAAETAAAMASASLVFKTSNSAYSSTLLKHAKQLFNFADKYPASYSENIPEVATYYNSTGYGDELLWAASWLYHATGDRSYLDYATGENGKLFASWGSPTWFSWDNKNAGTQVLLSRLSLFGAKGVSGNSGLGNYRSSAEGVMCGLLPKSPSATSSRTDGGLVWISEWNALQHPVASAFLAALYSDYMLTSQTAKITC…	99.43	0	gi|315419011|gb|ADU15552.1|	EG [Gossypium hirsutum]	76.26	0	sp|Q8LCP6|GUN10_ARATH	Endoglucanase 10 OS=Arabidopsis thaliana GN=At1g75680 PE=2 SV=2	99.43	0	E7CQZ8	E7CQZ8_GOSHI EG OS=Gossypium hirsutum PE=2 SV=1	-	-	-	-	-	-	-	K01179|1|4e-118|360|mtr:MTR_3g117500|EC[not_get]	metabolic_process		catalytic_activity
83	CotAD_37620	locus=At_chr6:11796725:11802801:+ [translate_table: standard]	40023.5	0.633	2|1|1	9|7|1	-/-/-	CotAD_37620	MSTASINGWCLTSSSSSTTTSSFSARRRPTLRPSVVASLNSSPSPPTLIQDRPVFAAPVPLLTPREEMGNKSYDEAIEALKKLLSEKGELKAEAAARVDQITAELNTTSADGKPSDSSVERLKEGFVYFKKEKYEKNPALYGELAKGQSPKYMIVACSDSRVCPSHVLDMQPGEAFVVRNVANMVPPYDQIKYAGIGSAIEYAVLHLKVQEIVVIGHSACGGIKGLMSFPLDGNNSTDFIEDWVKIGIPAKAKVLAEHGGEPLGVQCTHCEKEAVNVSLGNLLSYPFVRDGLVKKTLGIKGGYYDFVKGSFELWSLQFQLSSSLSMIEITCRPPSAVVAAVALSIYKFSFEEVKDVATILHWKLY	98.38	0	gi|20502881|gb|AAM22683.1|AF482951_1	carbonic anhydrase [Gossypium hirsutum]	70.66	6e-138	sp|P17067|CAHC_PEA	Carbonic anhydrase, chloroplastic OS=Pisum sativum PE=1 SV=1	98.38	0	Q8LSC8	Q8LSC8_GOSHI Carbonic anhydrase OS=Gossypium hirsutum GN=CAH2 PE=3 SV=1	HP0004	83.6	4e-18	COG0288	Carbonic anhydrase	P	Inorganic ion transport and metabolism ;	K01673|1|1e-156|446|jcu:105641543|EC[not_get]	-	-	-
84	CotAD_14542	locus=At_chr1:106209067:106211636:- [translate_table: standard]	34114.7	0.237	4|-|-	14|-|-	Cotton_D_gene_10023107;CotAD_11260/-/-	CotAD_14542	MAFVKAQKTKAYFKRFQVPFKRRREGKTDYRARIRLTNQDKNKYNTPKYRFVVRFSNKDITAQIISANITGDMILASAYSHELPRYGLEVGLTNYAAAYCTGLLLGRRVLKLLEMDDEYQGNVEATGEDFSVEPTDTRRPFRALLDVGLIRTTTGNNVFGALKGALDAGLDIPHSDKRFAGFSKDSKQLDAEVHRNYIYGGHVAAYMRILMEDEPEKYQSHFSEYIKRGIEADNIESLYKKVHAAIRADPSAKKSEKAPPKQHKRFNLKKLTYEERKAKLIDRLHTLNAAAGADSEDED	86.85	2e-173	gi|313586429|gb|ADR71225.1|	60S ribosomal protein L5A [Hevea brasiliensis]	84.54	1e-169	sp|Q6UNT2|RL5_CUCSA	60S ribosomal protein L5 OS=Cucumis sativus GN=RPL5 PE=2 SV=1	84.28	3e-171	A9PFA8	A9PFA8_POPTR Predicted protein OS=Populus trichocarpa GN=POPTRDRAFT_827713 PE=2 SV=1	Ta1252m	65.1	3e-12	COG0256	Ribosomal protein L18	J	Translation, ribosomal structure and biogenesis ;	K02932|1|0.0|508|tcc:TCM_019840|EC[not_get]	metabolic_process	cell cell_part macromolecular_complex	binding structural_molecule_activity
85	Cotton_D_gene_10000793	locus=scaffold472:116281:116958:- [translate_table: standard]	25650.3	0.036	-|1|-	-|1|-	-/-/-	Cotton_D_gene_10000793	MGEFICRNIFLNVVNLNWYFPHHHYHHNYCEETSTIISLGQFICENVCIAKSGPRLKSGQVFIVQADSIVIRSAKPYLATPGATVDGHYGEILYEGDTLVTFIYEKSRSGDITQGLPKVEQVLEVRSIDSISMNLEKRIEGWNECITRILGIPWGFVIGAELTIVQSRLSLVNKIQKVYRSQGVQIHNRHIEIIVRQITSKVLVSEDGMSNVFLPGELIGLLRAE	99.09	2e-148	gi|326457205|gb|ADZ74467.1|	RNA polymerase beta subunit [Gossypium herbaceum]	98.64	2e-148	sp|Q2L8Z5|RPOC2_GOSHI	DNA-directed RNA polymerase subunit beta'' OS=Gossypium hirsutum GN=rpoC2 PE=3 SV=1	99.09	3e-147	H2B925	H2B925_GOSRA DNA-directed RNA polymerase subunit beta'' OS=Gossypium raimondii GN=rpoC2 PE=3 SV=1	RC0182	53.5	1e-07	COG0086	DNA-directed RNA polymerase, beta' subunit/160 kD subunit	K	Transcription ;	K03046|1|3e-141|431|tcc:ThcaC_p011|EC[not_get]	metabolic_process	cell cell_part organelle	binding catalytic_activity
86	CotAD_66134	locus=Dt_chr12:29026041:29027805:+ [translate_table: standard]	22025.4	0.13	2|1|1	3|1|2	Cotton_D_gene_10016604;CotAD_66691/Cotton_D_gene_10016604;CotAD_66691/Cotton_D_gene_10016604;CotAD_66691	CotAD_66134	MSSVLNTVSSLRLSRVYNSNNNNHLRLPIHSVLTPPSVSFTRRRLTIRAADTDTNEVKSKAPDKAPAGGGSSFNQLLGIKGAAQETDKWKIRLQLTKPVTWPPLVWGVVCGAAASGNFHWNLEDVAKSILCMIMSGPCLTGYTQTLNDWYDREIDAINEPYRPIPSGAISENEVISQIWLLLLGGLGIAGLLDVWVGNFK	79.9	3e-101	gi|470133409|ref|XP_004302558.1|	PREDICTED: chlorophyll synthase, chloroplastic-like [Fragaria vesca subsp. vesca]	70.28	2e-90	sp|Q38833|CHLG_ARATH	Chlorophyll synthase, chloroplastic OS=Arabidopsis thaliana GN=CHLG PE=2 SV=1	78.89	2e-97	F8SPG5	F8SPG5_CAMSI Chlorophyll synthase OS=Camellia sinensis PE=2 SV=1	MJ0279	48.5	2e-06	COG0382	4-hydroxybenzoate polyprenyltransferase and related prenyltransferases	H	Coenzyme transport and metabolism ;	K04040|1|6e-122|353|tcc:TCM_021660|EC[not_get]	-	-	-
87	CotAD_54086	locus=Dt_chr5:39496410:39499420:+ [translate_table: standard]	22524.9	0.069	1|-|-	1|-|-	CotAD_66828;Cotton_D_gene_10036652;CotAD_38503;CotAD_38216;Cotton_D_gene_10023623/-/-	CotAD_54086	MEDKTSQFKIILGSSSLPRRKILTEMGYEFTLMSADIDEKGIRKEKPEELVMALAEAKADAILQRLPVSDYVKEAEPTLLITSDQVVVYEGVIREKPANEEEAHQFIKGYSGGHAATVGSVLVTNLKTGFRKGEWDRVEIHFHEIPDEVIEKLIEEGNVLHVAGGLLIEHPLIKPYIKQVVGTIDSVMGLPKAPTEKLIKEAV	78.43	5e-113	gi|470111278|ref|XP_004291875.1|	PREDICTED: maf-like protein DDB_G0281937-like isoform 2 [Fragaria vesca subsp. vesca]	42.19	3e-43	sp|Q54TC5|MAFL2_DICDI	Maf-like protein DDB_G0281937 OS=Dictyostelium discoideum GN=DDB_G0281937 PE=3 SV=1	78.79	1e-111	I1MXW5	I1MXW5_SOYBN Uncharacterized protein OS=Glycine max GN=Gma.44690 PE=4 SV=1	TM1556	56.2	2e-09	COG0424	Nucleotide-binding protein implicated in inhibition of septum formation	D	Cell cycle control, cell division, chromosome partitioning ;	K06287|1|1e-123|352|tcc:TCM_034047|EC[not_get]	-	-	-
88	CotAD_53202	locus=At_chr1:7864044:7868896:- [translate_table: standard]	78471.7	0.127	1|-|1	1|-|1	-/-/-	CotAD_53202	MHSLPSHAMRPLCLNPSLCSSRFPFFSFSIPIFHKFKNNPTIYKKSQKGPPFFSIRCCGSGSVTAKPSWELRRNRAAVQEPDEKVDALRQLFTKPGIGIDAYIIPSQDAHQSEFIAECYMRRAYISGFTGSAGTAIVTKDKAALWTDGRYFLQAEKQLNTSWKLMRAGNFGVPQASEWLNDVLAPGGRVGIDPVSNLFNLLNGEQFLFSYDAAEELKEVISKKNLELVYLYDLNLVDEIWKESRPKPPNKPIRVHDLKYAGIDVVSKLSSLRAELVAAGSSAIVISMLDEVAWLLNLRGSDVPHSPVMYAYLIVEVDAAKLFVDDSKVTSEVMYHLKKAGVDLRPYDSILSEIRRLAAEGAHLWLDTSSVNAAIVETYKAACDKYLMNRGSRGKRKNKQ…	74.89	0	gi|255542640|ref|XP_002512383.1|	xaa-pro aminopeptidase, putative [Ricinus communis]	48.31	0	sp|D1ZKF3|AMPP1_SORMK	Probable Xaa-Pro aminopeptidase P OS=Sordaria macrospora (strain ATCC MYA-333 / DSM 997 / K(L3346) / K-hell) GN=AMPP PE=3 SV=1	74.89	0	B9RF64	B9RF64_RICCO Xaa-pro aminopeptidase, putative OS=Ricinus communis GN=RCOM_1431630 PE=4 SV=1	SPy1824	97.8	2e-21	COG0006	Xaa-Pro aminopeptidase	E	Amino acid transport and metabolism ;	K01262|1|0.0|1190|tcc:TCM_026550|EC[not_get]			catalytic_activity
89	CotAD_15430	locus=scaffold165.1:427546:429483:+ [translate_table: standard]	21183.1	0.071	1|1|-	2|3|-	Cotton_D_gene_10013553/Cotton_D_gene_10013553/-	CotAD_15430	MDFSQPPVENYANPKTCFFHVLFKAAALAFYILSALFFNSFVIIFVVTVLLSALDFWVVKNVSGRILVGLRWWNEINDLGESVWRFECLDQESLARMNKKDSWLFWWTLYLSAVAWIVLGIFSLIRFQADYLLVIGVCLTLNIANIVGFTKCRKDAKKQIQQFATQTIASRFSPTSQSAFSVV	91.8	3e-121	gi|462420482|gb|EMJ24745.1|	hypothetical protein PRUPE_ppa012125mg [Prunus persica]	86.59	1e-114	sp|Q8LEK2|TVP23_ARATH	-	90.71	8e-118	B9N466	B9N466_POPTR Predicted protein OS=Populus trichocarpa GN=POPTRDRAFT_744441 PE=4 SV=1	-	-	-	-	-	-	-	-		membrane membrane_part
90	CotAD_68390	locus=At_chr1:65448671:65454859:- [translate_table: standard]	115997	0.018	-|-|1	-|-|1	-/-/-	CotAD_68390	MNLPISFAFSSYLLLLLLFSGVASASGFDPSELRSLLEFKKGIKTDPFDKVLSVWDPDSRPDPTSWTGVTRDPNSDSIVSLNLDRLGLVGDLKFHTLTPLKNLQNLSLSGNAFTGRVAPALGSITSLQHLDLSNNQFIGTIPGRIMDLYELNYLNLSGNKFDGGLPAGFRNLQQLRVLDLHNNALRGDIGQLFTELRNVEHVDLSYNAFYGGLSVAVENVSSLANTARFVNLSHNQLNGGFFKEEAIGLFKKLQVLDLGDNLIAGSLPSFGSLPGLRVLRLGTNQLFGPVPVELLEGSVPLEELDLSRNGFTGSVRVINSTTLKVLNLSSNQLSGDLPSSLRSCEIVDLSGNTISGDISVMENWEASLVILDLSSNKLSGSLSNSSHFEDLNTLNLRNN…	68.64	0	gi|225438587|ref|XP_002276354.1|	PREDICTED: probable inactive receptor kinase At5g10020 [Vitis vinifera]	62.13	0	sp|Q0WR59|Y5020_ARATH	Probable inactive receptor kinase At5g10020 OS=Arabidopsis thaliana GN=At5g10020 PE=1 SV=2	68.64	0	D7SW45	D7SW45_VITVI Putative uncharacterized protein OS=Vitis vinifera GN=VIT_07s0031g01440 PE=4 SV=1	MT0017_1	60.5	9e-09	COG0515	Serine/threonine protein kinase	RTKL	General function prediction only ; Signal transduction mechanisms ; Transcription ; Replication, recombination and repair ;	K04730|1|3e-118|377|mdm:103422917|EC[not_get]!K13420|3|3e-47|187|brp:103839616|EC[not_get]		membrane	catalytic_activity
91	CotAD_39055	locus=Dt_chr2:10300639:10305135:- [translate_table: standard]	75059.5	0.071	1|2|-	1|2|-	CotAD_15011;Cotton_D_gene_10001766/CotAD_15011;Cotton_D_gene_10001766/-	CotAD_39055	MSVTYTVKVEDSRPESGKKPSAGPVYRCIYAKDGLLDLPDGMHSPWEFFSESVKRNPNNRMLGRRQTTDSKQAGPYVWITYQEAYDAALRIGSAMRNQGVSPGDRCGIYGSNCPEWIITMEACNCQAVTYVPLYDTLGANAVEFIVNHAEVAIAFVQENKLPAILSCLPACCSYLKTIVSFANVSSIQKKEAEELGVSLFSWKEFSELGSLDCELPQKQKTDICTIMYTSGTTGEPKGVILTNKAIMTEVLSIDQLIEITDKACSEEDTYFSFLPLAHVYDQIMETYFIKRGSSIGFWQGDVRYLMDDVQELKPTAFCAVPRVYDRIYTGIVNKIASGGLIRNKLFQYAYNYKLRNMENGFPQDKASPLLDKLVFDKVRQALGGKVRLMLSGAAPLPRH…	76.71	0	gi|470147744|ref|XP_004309440.1|	PREDICTED: long chain acyl-CoA synthetase 2-like [Fragaria vesca subsp. vesca]	71.17	0	sp|Q9XIA9|LACS2_ARATH	Long chain acyl-CoA synthetase 2 OS=Arabidopsis thaliana GN=LACS2 PE=2 SV=1	76.9	0	D7TPV8	D7TPV8_VITVI Putative uncharacterized protein OS=Vitis vinifera GN=VIT_03s0063g01880 PE=4 SV=1	slr1609	193	2e-52	COG1022	Long-chain acyl-CoA synthetases (AMP-forming)	I	Lipid transport and metabolism ;	K01897|1|0.0|1269|tcc:TCM_006299|EC[not_get]	-	-	-
92	CotAD_16105	locus=scaffold154.1:1615204:1618262:- [translate_table: standard]	32240.5	0.378	10|7|7	67|68|77	Cotton_D_gene_10012135/Cotton_D_gene_10012135/Cotton_D_gene_10012135	CotAD_16105	MAEEKKAQSAGVWPTVKPFVNGGASGMLATCVIQPIDMVKVRIQLGQGSAATVTKNMLREEGVGAFYKGLSAGLLRQATYTTARLGSFKMLTNKAIEANDGKPLPLYQKALCGLTAGAIGACFGSPADLALIRMQADATLPVAQRRNYTNAFHALYRIVADEGVLALWKGAGPTVVRAMALNMGMLASYDQSVEFCKDSLGLGEAATVLGASTVSGFFAAACSLPFDYVKTQIQKMQPDASGKYPYSGSLDCAMKTLKAGGPFKFYTGFPVYCVRIAPHVMMTWIFLNQIQKAEKKIGL	90.57	0	gi|19913109|emb|CAC84547.1|	dicarboxylate/tricarboxylate carrier [Nicotiana tabacum]	86.29	0	sp|Q9C5M0|DTC_ARATH	-	90.57	0	Q8SF02	Q8SF02_TOBAC Dicarboxylate/tricarboxylate carrier OS=Nicotiana tabacum GN=dtc3 PE=2 SV=1	-	-	-	-	-	-	-	K15104|1|0.0|591|tcc:TCM_039990|EC[not_get]	localization	membrane membrane_part
93	Cotton_D_gene_10022541	locus=scaffold110:706003:707445:+ [translate_table: standard]	53363.4	0.204	-|2|4	-|11|20	-/CotAD_13189/CotAD_13189	Cotton_D_gene_10022541	MVKICCIGAGYVGGPTMAVIALKCPEIEVAVVDISVSRITAWNSDALPIYEPGLDEVVKKCRGKNLFFSTDVEKHVSEADIVFVSVNTPTKTQGLGAGKAADLTYWESAARMIADVSKSNKIVVEKSTVPVKTAEAIEKILTHNSKGIDFQILSNPEFLAEGTAIQDLFNPDRVLIGGRETPEGQKAIAALRDVYAHWVPVDRIICSNLWSAELSKLAANAFLAQRISSVNAMSALCEATGADVSQVAHAVGKDTRIGPKFLNASVGFGGSCFQKDILNLVYICECNGLPEVANYWKQVIKINDYQKTRFVNRIVSSMFNTVSGKKIAILGFAFKKDTGDTRETPAIDVCKGLLGDKALLSIYDPQVNEEQIQRDLAMKKFDWDHPVHLQPMSPTSIKQ…	99.79	0	gi|283488491|gb|ADB24767.1|	UDP-D-glucose dehydrogenase [Gossypium hirsutum]	88.54	0	sp|Q96558|UGDH_SOYBN	UDP-glucose 6-dehydrogenase OS=Glycine max PE=2 SV=1	99.79	0	D2WK26	D2WK26_GOSHI UDP-glucose 6-dehydrogenase OS=Gossypium hirsutum GN=UGD4 PE=2 SV=1	PA3559	231	5e-70	COG1004	Predicted UDP-glucose 6-dehydrogenase	M	Cell wall/membrane/envelope biogenesis ;	K00012|1|0.0|951|tcc:TCM_011574|EC[not_get]	metabolic_process		binding catalytic_activity
94	CotAD_29425	locus=scaffold743.1:145924:152345:- [translate_table: standard]	109296	0.273	2|2|4	4|5|10	-/-/-	CotAD_29425	MYCRARFASRLASTTAVASFSPSVCSRVSSPIASPSSASSVSFWNKRYRSLSFLSSLRSLRCSAPRLHWRSPESLRILARTSVPVVERFHRRIATTASEHPFKGVMASIPKPGGGEFGKFYSLPALNDPRIDRLPYSIRILLESAIRNCDNFQVTKDDVEKIIDWENTSPKQVEIPFKPARVLLQDFTGVPAVVDLASMRDAMKNLGNDPKKINPLVPVDLVIDHSVQVDVARSENAVQENMELEFKRNKERFAFLKWGSSAFHNMLVVPPGSGIVHQVNLEYLGRVVFNSDGMLYPDSVVGTDSHTTMIDGLGVAGWGVGGIEAEAAMLGQPMSMVLPGVVGFKLSGKLRDGVTATDLVLTVTQMLRKHGVVGKFVEFYGEGMGELSLSDRATIANMS…	89.18	0	gi|255566397|ref|XP_002524184.1|	aconitase, putative [Ricinus communis]	89.41	0	sp|P49608|ACOC_CUCMA	Aconitate hydratase, cytoplasmic OS=Cucurbita maxima PE=2 SV=1	89.18	0	B9SDW5	B9SDW5_RICCO Aconitase, putative OS=Ricinus communis GN=RCOM_0487910 PE=4 SV=1	Rv1475c	927	0	COG1048	Aconitase A	C	Energy production and conversion ;	K01681|1|0.0|1743|cic:CICLE_v10007338mg|EC[not_get]			binding catalytic_activity
95	CotAD_28924	locus=Dt_chr1:50511322:50513774:+ [translate_table: standard]	32233.8	0.054	1|-|-	1|-|-	Cotton_D_gene_10003477;Cotton_D_gene_10034295;Cotton_D_gene_10021565;CotAD_34612;CotAD_70854;CotAD_37558;Cotton_D_gene_10007217;CotAD_29706;CotAD_37506;CotAD_59946/-/-	CotAD_28924	MEGEIRQLCTVAREIFLQQPNLLELEAPIKICGDIHGQYADLLRLFEYGGFPPKANYLFLGDYVDRGKQSLETICLLLAYKIKYPENFFLLRGNHECASINRIYGFYDECKRRFNVRLWKTFTDCFNCLPVAALIDDKILCMHGGLSPDLTNLDQIRSITRPTDVPDSGLLCDLLWSDPGRDIKGWGMNDRGVSFTYGPDRVSDFLMKNDMDLVCRAHQVVEDGYEFFADRQLVTIFSAPNYCGEFDNAGAMMSVDESLMCSFQILKPADKRSRFI	91.64	0	gi|224054593|ref|XP_002298335.1|	predicted protein [Populus trichocarpa]	89.82	0	sp|P48482|PP12_ARATH	Serine/threonine-protein phosphatase PP1 isozyme 2 OS=Arabidopsis thaliana GN=TOPP2 PE=2 SV=1	91.64	0	B9GJ75	B9GJ75_POPTR Serine/threonine-protein phosphatase OS=Populus trichocarpa GN=POPTRDRAFT_641133 PE=3 SV=1	MA3259	135	4e-37	COG0639	Diadenosine tetraphosphatase and related serine/threonine protein phosphatases	T	Signal transduction mechanisms ;	K06269|1|0.0|557|tcc:TCM_041749|EC[not_get]			catalytic_activity
96	CotAD_19274	locus=At_chr10:30817338:30820089:- [translate_table: standard]	60090.3	0.08	1|1|-	1|2|-	-/-/-	CotAD_19274	MVLSTKLHRFDLRSTFFTSPCPSFTPNSSSLVSRKTFKFKPTKITAQVFTLSVETSVKDPESDIESLISSNTEEINRKRSSKQSITGASGISSGVKLENISKSYKGVTVSKDVSWEVKKGEKVGLVGVNAAGKTTGLRIITGQEEPDSGNVIKAKSNMKNAFLNQEFEVSMSRTVREELMSAFKEEMEISERLERVQKTIEGATEDLELMGRLLDEFDLLQRRAQAVDLDEVDAKVSKLMPELGFSPEDSDSSGFHFLSTTRRKQNLFAPTISNKLIHPPPLHAPPLLPSISRINGKMKACCRAISTTYPMSITSRFNPCFITKVAEPNAGLIGDEDDVLQDPNTLSHLKTELLQQLKGINRGIFGVPSSKKSDVEAMVKLLESHNPTPDPILNLEKVG…	68.2	2e-109	gi|470141759|ref|XP_004306596.1|	PREDICTED: probable plastid-lipid-associated protein 7, chloroplastic-like [Fragaria vesca subsp. vesca]	70.93	1e-96	sp|Q9LV93|AB5F_ARATH	ABC transporter F family member 5 OS=Arabidopsis thaliana GN=ABCF5 PE=2 SV=1	66.96	1e-107	D7U428	D7U428_VITVI Putative uncharacterized protein OS=Vitis vinifera GN=VIT_04s0044g00530 PE=4 SV=1	RP508	62	4e-10	COG1137	ABC-type (unclassified) transport system, ATPase component	R	General function prediction only ;	-	-	-	-
97	CotAD_52908	locus=Dt_chr6:2490799:2494833:+ [translate_table: standard]	59940.1	0.024	-|1|-	-|1|-	-/Cotton_D_gene_10026742;CotAD_06850;CotAD_46852/-	CotAD_52908	MLKIAQYILKLVKISGITIAASRVKEKATYVQLICKNRNSSRTVTCRPGLGGAIVPRSCDHVPQPGEEPCPIDPWIVVPERSKNVDQQTLTLQENPEDVPTGELPRNMLLLVDRHLVQTIVPGTRLTIMGIYSIFQAANSSTNHKGAVTVRQPYIRIVGMEETNEASSRGPATSTQEEKAVACLLFGGARKNLPDGVKLRGDINVLLLGDPSTAKSQTAPIAVYTSGKGSSAAGLTASVIRDSSSREFYLEGAIVLFTWRVAIHEAMKQQTISIAKAGITTVLNSRTSVLAAANPPSGRYDDLKTAQDNFDLRTTILSRFDLIFIVKDVSLYDQDKIIASHIIKVHSSAQAASGDIRASKEENWLKRYIQYCRSECHPHLSEAACAKLQSDYVDIRREM…	74.66	0	gi|225462994|ref|XP_002263791.1|	PREDICTED: DNA replication licensing factor mcm5-A-like [Vitis vinifera]	46.34	2e-164	sp|P55862|MCM5A_XENLA	DNA replication licensing factor mcm5-A OS=Xenopus laevis GN=mcm5-a PE=1 SV=2	74.32	0	D7T529	D7T529_VITVI Putative uncharacterized protein OS=Vitis vinifera GN=VIT_11s0149g00130 PE=3 SV=1	SPBC25D12.03c	198	1e-54	COG1241	Predicted ATPase involved in replication control, Cdc46/Mcm family	L	Replication, recombination and repair ;	K02209|1|0.0|951|tcc:TCM_047088|EC[not_get]	-	-	-
98	Cotton_D_gene_10025918	locus=scaffold24:1770656:1773168:+ [translate_table: standard]	21798.6	0.047	-|-|1	-|-|1	-/-/CotAD_25595;CotAD_58060	Cotton_D_gene_10025918	MAFAGTTQKCMACDKTVYLVDKLTADNRVYHKACFRCHHCKGTLKLGNYNSFEGVLYCRPHFDQLFKRTGSLEKSFEGTPKIAKPEKPVDGEKPIATKVSGMFGGTRDKCFGCKNTVYPTERVTVNGTPYHKSCFKCTHGGCVISPSNYIAHEGRLYCKHHHGQLIKEKGNLSQLEGDREKDGTEVAAES	100	5e-141	gi|410109643|gb|AFV60741.1|	LIM domain protein LIM-2 [Gossypium hirsutum]	72	2e-92	sp|P29675|SF3_HELAN	Pollen-specific protein SF3 OS=Helianthus annuus GN=SF3 PE=2 SV=1	88.83	7e-128	Q8SBC9	Q8SBC9_POPKI Transcription factor LIM OS=Populus kitakamiensis GN=Pklim1 PE=2 SV=1	-	-	-	-	-	-	-	K09377|1|5e-130|365|jcu:105630840|EC[not_get]			binding
99	CotAD_39767	locus=Dt_chr13:14400437:14402130:+ [translate_table: standard]	18507.9	0.067	1|-|-	5|-|-	CotAD_48996/-/-	CotAD_39767	MGINKLLCWFAVFFFLLGFSACSSISDGVFDSFTSTGRHLLQAKKACPVNFEFLNYTIITSQCKGPKYPPESCCSAFKEFACPYAEQINDLTTECASTMFSYINLYGKYPPGLFASECREGKEGLACPALSPSASASENANGSQQLIRNPWMLVMAAIIAAAMLL	67.69	7e-56	gi|462401652|gb|EMJ07209.1|	hypothetical protein PRUPE_ppa012359mg [Prunus persica]	63.27	2e-42	sp|B3GS44|LRE_ARATH	GPI-anchored protein LORELEI OS=Arabidopsis thaliana GN=LRE PE=2 SV=1	79.41	8e-54	B9GHJ9	B9GHJ9_POPTR Predicted protein OS=Populus trichocarpa GN=POPTRDRAFT_550665 PE=4 SV=1	-	-	-	-	-	-	-	-	-	-	-
100	Cotton_D_gene_10004408	locus=scaffold276:187714:207920:- [translate_table: standard]	242305	0.004	-|-|1	-|-|1	-/-/CotAD_38865	Cotton_D_gene_10004408	MSLELNSPFLGIPLGSSSNGKISNRHCLDFSRGKLLKRAFRKRVSAEKQNDWIAQAIRFSHFCGKNIEMFRKTIGLRNGFVAKSVKEPFAGSKALVRSLSPLWNEGLLLVRCSVLASVLSAVCLMVWYGQKKAKAFVEAKLLPSVCSALSEHIQREVDFGKVRSVSPLSITLEACSIGPHTEEFSCGEVPSMKIHVQPFASLRRGKIVIDAVLSHPSLLIAQKKDYTWLGLPFSEDVLQRHLSTEEGIDYRTKSRRIAREESATRWARERDDDAKKSAEMGYSVPEGISDRSEDDTVKEIGSSAEITSSKSFSCLDDKMHQRDHHCVDTNVDYETKHAELEKSFGVKIPGSGLTLWPKVIKGSKGNKFKKKFNGRDTSSAGVAAKRRILERSASAAVAY…	72.05	0	gi|470110283|ref|XP_004291414.1|	PREDICTED: uncharacterized protein LOC101298087 [Fragaria vesca subsp. vesca]	-	-	-	-	71.43	0	B9RS87	B9RS87_RICCO Putative uncharacterized protein OS=Ricinus communis GN=RCOM_0804300 PE=4 SV=1	-	-	-	-	-	-	-	-	developmental_process reproductive_process
101	CotAD_48083	locus=At_chr4:83678448:83679803:- [translate_table: standard]	50102.4	0.024	-|-|1	-|-|1	-/-/-	CotAD_48083	MALLFYHLPFLPFLFLFLHFIASLSSPTQNLNDTLSFSFPLTSLRISPDVKVQTLSSSLVAGANKHGTRRLARPNSGSYNYKTTFKYSMALIVALPIGTPPQTQQMVLDTGSQLSWIQCHKKLAKKPPPTASFDPSLSSSFSVLPCNHPLCKPRIPDFTLPTSCDQNRLCHYSYFYADGTLAEGNLVREKITFSRSQSTPPLILGCATDSSEDKGILGMNLGRFSFAYQSKISKFSYCVPTRRTKPGVSPTGSFYLGQNPNSHGFQYINLLAFPQSRTMPNMDPLAYTLPMLGIRIGAKKLAIPMHVFRPDAGGSGQTMIDSGSEFTYLVDEAYNKVREEVVRLVGPRLKKGYVYGGVADMCIDGNPVQFGRLVGDMVLEFEKGVEITVPKDRMLADVG…	76.12	0	gi|224065128|ref|XP_002301682.1|	predicted protein [Populus trichocarpa]	37.37	5e-63	sp|Q9LZL3|PCS1L_ARATH	-	76.12	0	B9GUR2	B9GUR2_POPTR Predicted protein OS=Populus trichocarpa GN=POPTRDRAFT_552931 PE=3 SV=1	-	-	-	-	-	-	-	K01381|1|3e-17|85.9|smo:SELMODRAFT_13348|EC[not_get]!K00924|2|2e-13|75.9|tcc:TCM_041550|EC[not_get]	metabolic_process		catalytic_activity
102	Cotton_D_gene_10021026	locus=scaffold337:1597075:1600328:+ [translate_table: standard]	100195	0.018	-|1|-	-|1|-	-/CotAD_33520;CotAD_53070/-	Cotton_D_gene_10021026	MGNIDHRHFLYPFLLLSAVLCAADDGAVIVKLASSLSPLPRGWSSTSSDNYCNWSGIKCASNRVTSINLASKSLSGSLPADISTLSELRTVSLQHNSLSGSIPSFANLSNLQSIYLDGNSFTSVTPNAFFGLTSLQTLSLSENTKLSPWTFPDLSQSTSLVEVQLDNTNLYGTLPDVFQSLNSLQSIRLSYNNLNGTLPASLAGSMIQNLWINNQNVGFTGTLDVLSNMTDLLQVWVHKNMFTGQIPDLSKSMGIFDIQLRENLLTGPVPGSLTNLPSLKNISLSNNKLQGPFPKFPNTVENIAVNGTNNFCNSNGDPCDPQVTTLLEIAGGFGYPVFLSDDWPGNDACQWVFVRCDSQGNVITVNLAKKNLVGTISPAIANLTKLKNLNLNDNNLTGS…	64.78	0	gi|356538063|ref|XP_003537524.1|	PREDICTED: probable receptor protein kinase TMK1-like [Glycine max]	68.45	4e-172	sp|P43298|TMK1_ARATH	Probable receptor protein kinase TMK1 OS=Arabidopsis thaliana GN=TMK1 PE=2 SV=1	64.78	0	I1LN37	I1LN37_SOYBN Uncharacterized protein OS=Glycine max GN=Gma.28047 PE=4 SV=1	DRA0332	79	1e-14	COG0515	Serine/threonine protein kinase	RTKL	General function prediction only ; Signal transduction mechanisms ; Transcription ; Replication, recombination and repair ;	K17285|1|0.0|573|egr:104414265|EC[not_get]!K00924|3|3e-179|546|vvi:100265723|EC[not_get]	-	-	-
103	CotAD_30435	locus=Dt_chr4:11369143:11370324:- [translate_table: standard]	43452.7	0.415	-|1|1	-|5|9	-/-/-	CotAD_30435	METFLFTSESVNEGHPDKLCDQVSDAVLDACLAQDPDSKVACETCTKTNMVMVFGEITTKANVDYEKIVRDTCRSIGFVSDDVGLDADNCKVLVNIEQQSPDIAQGVHGHFTKRPEEIGAGDQGHMFGYATDETPEFMPLSHVLATKLGARLTDVRKNGTCPWLRPDGKTQVTVEYYNDSGAMVPVRVHTVLISTQHDETVTNDEIAADLKEHVIKPVIPEKYLDEKTIFHLNPSGRFVIGGPHGDAGLTGRKIIIDTYGGWGAHGGGAFSGKDPTKVDRSGAYIVRQAAKSIVANGLARRCIVQVSYAIGVPEPLSVFVDSYGTGKIPDKEILQIVKENFDFRPGMITINLDLKRGGNGRFLKTAAYGHFGRDDPDFTWEVVKPLKWDKPQS	98.73	0	gi|307948774|gb|ADN96174.1|	S-adenosylmethionine synthetase [Gossypium hirsutum]	96.69	0	sp|Q9AT56|METK1_ELAUM	S-adenosylmethionine synthase 1 OS=Elaeagnus umbellata GN=SAMS1 PE=2 SV=1	98.73	0	E2GMU6	E2GMU6_GOSHI S-adenosylmethionine synthase OS=Gossypium hirsutum GN=SAMS PE=2 SV=1	DR0640	403	5e-139	COG0192	S-adenosylmethionine synthetase	H	Coenzyme transport and metabolism ;	K00789|1|0.0|764|cmo:103499979|EC[not_get]	cellular_process metabolic_process	cell cell_part	binding catalytic_activity
104	Cotton_D_gene_10006428	locus=scaffold328:445127:451064:- [translate_table: standard]	141667	0.017	-|1|1	-|2|2	-/CotAD_18383;Cotton_D_gene_10004986;CotAD_52936;CotAD_60017/CotAD_18383;Cotton_D_gene_10004986;CotAD_52936;CotAD_60017	Cotton_D_gene_10006428	METSAASSSSETKKEGSNNGSGEKPGDVPSVGFGELFRFADGLDYVLMGIGSLGALVHGCSLPIFLRFFADLVNSFGSNANNMDKMMQEVLKYAFYFLVVGAAIWASSWAEISCWMWTGERQTTKMRIKYLEAALDQDIKYFDTEVRTSDVVFAINTDAVMVQDAISEKLGNFIHYMATFVSGFAVGFTAVWQLALVTLAVVPLIAVIGAIHTTTLAKLSAKNQEALSQGGNIVEQTVVQIRVVLAFVGESRALQAYSSALKVAQKIGYKTGFAKGMGLGATYFVVFCCYALLLWYGGYLVRHHYTNGGLAIATMFAVMIGGLGLGQSAPSMSAFVKAKVAAAKIFRIIDNKPGIDRNSESGLDLESVTGLVELKNVDFAYPSRPDVRILNNFFLTVPA…	92.25	0	gi|255556910|ref|XP_002519488.1|	multidrug resistance protein 1, 2, putative [Ricinus communis]	89.42	0	sp|Q9ZR72|AB1B_ARATH	ABC transporter B family member 1 OS=Arabidopsis thaliana GN=ABCB1 PE=1 SV=1	92.25	0	B9S0G9	B9S0G9_RICCO Multidrug resistance protein 1, 2, putative OS=Ricinus communis GN=RCOM_1354650 PE=3 SV=1	TM0288	272	2e-78	COG1132	ABC-type multidrug transport system, ATPase and permease components	V	Defense mechanisms ;	K05658|1|0.0|2264|tcc:TCM_022244|EC[not_get]	cellular_process localization metabolic_process single-organism_process	membrane membrane_part	binding catalytic_activity transporter_activity
105	CotAD_28030	locus=Dt_chr8:52249736:52251662:+ [translate_table: standard]	35486.1	0.142	1|1|1	2|1|2	-/-/-	CotAD_28030	MASKLALTLTPHRFLNGHIQKPLVSFSSSTRVLSNGKQLCCRHRLFVLPIKAAADQQGQVEEDNVVDSKILPYCSIDKKEKKSLGEMEQEFLQALQAFYYEGKAIMSNEEFDNLKEELTWEGSSVVMLSSDEQKFLEASMAYVSGKPILNDEEFDGLKLGLKMEGSEIVVEGPRCSLRSRKVYSDLSVDYLKMVLLNVPATVVALGLFFFLDDLTGFEITYALELPKPFSFIFTWFAAVPLIVWLAQSLTKLVVKDSLILKAPCPNCGTENVSFFGTILSISNGGTTNTLKCSNCGTPLEYNSKTRLITLPEGTQA	79	1e-168	gi|356514103|ref|XP_003525746.1|	PREDICTED: PGR5-like protein 1A, chloroplastic-like [Glycine max]	71.38	8e-153	sp|Q8H112|PGL1A_ARATH	PGR5-like protein 1A, chloroplastic OS=Arabidopsis thaliana GN=PGRL1A PE=1 SV=1	79	2e-167	I1K0F7	I1K0F7_SOYBN Uncharacterized protein OS=Glycine max PE=4 SV=1	-	-	-	-	-	-	-	-	-	-	-
106	CotAD_39758	locus=Dt_chr13:14300312:14302963:+ [translate_table: standard]	49745.1	0.027	1|-|-	1|-|-	Cotton_D_gene_10018952/-/-	CotAD_39758	MFQSRVVGSILKRNKAIINSLTSNLKGTCSSRCFTPSSANAVARTSFYGFRSLPKGHHVPSFRNMSTVASVGTEKQGLKMLVTAGPRAQKMVGIWLFGSAAWVFSMVVLGGVTRLTRSGLSMTDWKFAGNLPPLSDEEWQQEFEKYKQSPEYKRVNKGMSIEEFKFIYWMEYAHRMWGRALGVMFALPFSYFLRKGYITMRLGLRLSALFALGAGQGLIGWWMVKSGLEEPASEYVEPRVSPYRLAAHLTSAFVIYSGLFWTALSVVMPEPPAESLAWVQGAAKLKRLAIPVSLIVGITAVSGAFVAGNDAGRAYNTFPKMGDVWVPDNIFELKPTIRNFFENTSMVQLDHRILATTTLISICGLWWSTKKLDIHPAIRTLVGATFGMAALQVTLGVST…	78.94	0	gi|449438899|ref|XP_004137225.1|	PREDICTED: cytochrome c oxidase assembly protein COX15-like [Cucumis sativus]	76.6	0	sp|Q9FKT8|COX15_ARATH	Cytochrome c oxidase assembly protein COX15 OS=Arabidopsis thaliana GN=COX15 PE=2 SV=1	76.72	0	B9N5M1	B9N5M1_POPTR Predicted protein OS=Populus trichocarpa GN=POPTRDRAFT_582551 PE=3 SV=1	CC1374	187	4e-55	COG1612	Uncharacterized protein required for cytochrome oxidase assembly	O	Posttranslational modification, protein turnover, chaperones ;	K02259|1|0.0|790|tcc:TCM_030537|EC[not_get]	cellular_component_organization_or_biogenesis cellular_process metabolic_process single-organism_process	membrane
107	Cotton_D_gene_10002924	locus=scaffold409:341474:347392:- [translate_table: standard]	66968.4	0.019	1|-|-	1|-|-	-/-/-	Cotton_D_gene_10002924	MGKKSKKPGKGKEKTERKTAKAEEKRARRESKKLSPEDDIDAILLSIQKEEAKKKDVHVDENVPAPSPRSNCSLTVNPLKDTELILYGGEFYNGSKTFVYGDLYRFDVEKMEWKLVSSPNSPPPRSAHQAVAWKNYLYIFGGEFTSPNQERFHHYKDFWMLDLKTNQWEQLNLKGCPSPRSGHRMVLYKHKIIVFGGFYDTLREVRYYNDLHIFDLDEFKWQEIKPRLGSMWPSARSGFQFFVYQDQIYLYGGYYKEVSSDKNSSASEKGIVHADMWSLDPKTWEWNKVKKSGMPPSARAGFSMCVHKKRAMLFGGVVDMEMEGDVMMSLFLNELYGFQLDNHRWYPLELRKEKSTKVKSRKDSKQETSGSDYNDEVNIEAETSGIDDKDQIMEYDEQA…	60.11	0	gi|302811229|ref|XP_002987304.1|	hypothetical protein SELMODRAFT_235261 [Selaginella moellendorffii]	40.27	4e-78	sp|Q921I2|KLDC4_MOUSE	Kelch domain-containing protein 4 OS=Mus musculus GN=Klhdc4 PE=1 SV=2	60.11	0	D8SVH7	D8SVH7_SELML Putative uncharacterized protein OS=Selaginella moellendorffii GN=SELMODRAFT_235261 PE=4 SV=1	-	-	-	-	-	-	-	K12872|1|4e-21|99.4|smo:SELMODRAFT_425040|EC[not_get]!K15450|3|4e-19|95.1|brp:103858670|EC[not_get]	-	-	-
108	CotAD_62966	locus=At_chr2:44113714:44114085:- [translate_table: standard]	14154.4	0.073	1|-|-	1|-|-	-/-/-	CotAD_62966	MQAIRNVLWRQKFNDSQEALKMFDNILRQYAAKLECLFVRQSFFQGNQSNFIDIGGGVFGCRAYFIGEAVIQIQEIADHLQILVERASTLSTNIKRGSSDRGRELALLLDRVQTLRLPAKAYL	59.38	9e-19	gi|84688912|gb|ABC61505.1|	AGO4-2, partial [Nicotiana benthamiana]	54.69	2e-17	sp|Q9SDG8|AGO4A_ORYSJ	Protein argonaute 4A OS=Oryza sativa subsp. japonica GN=AGO4A PE=2 SV=1	59.38	1e-17	Q2LFC1	Q2LFC1_NICBE AGO4-2 (Fragment) OS=Nicotiana benthamiana PE=2 SV=1	-	-	-	-	-	-	-	K11593|1|3e-19|85.1|tcc:TCM_042027|EC[not_get]	-	-	-
109	CotAD_61327	locus=At_chr1:104336390:104336908:- [translate_table: standard]	19177	0.093	1|2|-	1|4|-	CotAD_08069;Cotton_D_gene_10008457/CotAD_08069;Cotton_D_gene_10008457/-	CotAD_61327	MCGISAKFKPPWPLEHFLFIVAKLIPTWRVVPTRGSIPDVSFKEPWKRKLAIASPRRTVARPRAATAYELIRICNDLQGRFEEVDVPLLIVHGGDDVVCDPACVEELYKRAASTDKTLRIHPGMWHQLVGEPEESVELVFGEMIDWLKSRGSRAAEAKGASGLSSAVGSTSG	79.01	4e-83	gi|470143456|ref|XP_004307391.1|	PREDICTED: monoglyceride lipase-like [Fragaria vesca subsp. vesca]	32.53	9e-08	sp|P28321|MGLL_YEAST	Monoglyceride lipase OS=Saccharomyces cerevisiae (strain ATCC 204508 / S288c) GN=YJU3 PE=1 SV=2	79.49	7e-78	I1LD14	I1LD14_SOYBN Uncharacterized protein OS=Glycine max GN=Gma.19317 PE=4 SV=1	DR1537	49.3	6e-07	COG2267	Lysophospholipase	I	Lipid transport and metabolism ;	K18368|1|4e-20|88.2|atr:18433044|EC[not_get]	-	-	-
110	CotAD_17546	locus=Dt_chr8:49346095:49347397:+ [translate_table: standard]	39808.6	0.049	-|1|-	-|1|-	-/Cotton_D_gene_10024351/-	CotAD_17546	MDTNVVSRGFAGSLPVDSVQALASKNLKNIPSRYIRPEVEFVVSIDESQQFPVIDMSKLDNDDEQKKLHQACKDWGFFQLINHGIADELIEKMKIDTQEFFKLPLEEKMAYAQLPNEIEGYGQTLVRSADQKLDWNDMLFLFPLPVPLRNMRFWPTNPPSFRETFDKYSTELHKVMIYLINRIAKNLGTDPEMLSSFFEDGAQAIRTNYYPPCAEASKVLGASPHSDATGLTLLLQVNEVEGLQIKKDEKWVPVKPILGALIVNIGDIIEIMSNGEYKSIEHRVVVNQEKERLSLAAFHSPKAGTEIGPLADLVRTNKAQYKTMSLEEFLRLRLSRKVQGKHLLNQMKL	64.66	8e-164	gi|255573431|ref|XP_002527641.1|	Flavonol synthase/flavanone 3-hydroxylase, putative [Ricinus communis]	59.49	9e-144	sp|A2A1A0|NCS1_COPJA	S-norcoclaurine synthase 1 OS=Coptis japonica GN=NCS1 PE=1 SV=1	64.66	1e-162	B9SNS2	B9SNS2_RICCO Flavonol synthase/flavanone 3-hydroxylase, putative OS=Ricinus communis GN=RCOM_1278050 PE=3 SV=1	RSp1529	61.6	4e-10	COG3491	Isopenicillin N synthase and related dioxygenases	R	General function prediction only ;	K05278|1|1e-70|226|fve:101296827|EC[not_get]	metabolic_process single-organism_process		catalytic_activity
111	Cotton_D_gene_10036056	locus=scaffold22:987981:988301:- [translate_table: standard]	12168.9	0.066	1|-|-	1|-|-	-/-/-	Cotton_D_gene_10036056	MSIVLGRLKSCFGCQLNANLFKYETIFDLQSPCKKGEDFLYFNKPKELEFCEHQPANETHAIDQAETKITRADKETGKMEPAIANRPGARIDSHITEPSSKGSHHE	-	-	-	-	-	-	-	-	-	-	-	-	-	-	-	-	-	-	-	-	-	-	-
112	CotAD_65258	locus=At_chr3:51727579:51732844:- [translate_table: standard]	74344.3	0.016	-|1|-	-|1|-	-/CotAD_70173/-	CotAD_65258	MDPKVSQFVILLPLIFLLIVQTLNALDSSSATIPMNCTDTSRLCTSFLAFKPQGNQSLAVIQSMFDVIPQDITVEGEDSHGYIFIKKNCSCLTSSKNYATNTTFTVRSNQGYVYDMILEAYDRLAMVPNVSRPARIGAVVSLRLFCGCSSSLWNYLMSYVMKDGDSVQSLASRFGVSMDSIEQVNGISNPDNVTVGALYYIPLNSVPGEPYHVENEIPPAPVPAPSADAISEIQVSPKAHVPYRWIIGALGVGLALIILSIVVCVSLRSSSCFVEARGSHAKDHDDRSSHKFHILRKPSFCCGSGRYICGKSENWTQTNGEPSNHQITIPNALGTDVLDVEKPVVFTYEDILFSTDGFSDSNLLGHGIYGSVYFGFLRDQEVAIKRMTATKTKEFMAEM…	77.34	0	gi|255549818|ref|XP_002515960.1|	Serine/threonine-protein kinase PBS1, putative [Ricinus communis]	68.58	0	sp|F4IB81|LYK3_ARATH	-	77.34	0	B9RQE1	B9RQE1_RICCO Serine/threonine-protein kinase PBS1, putative OS=Ricinus communis GN=RCOM_1489300 PE=4 SV=1	slr0152	77.4	4e-14	COG0515	Serine/threonine protein kinase	RTKL	General function prediction only ; Signal transduction mechanisms ; Transcription ; Replication, recombination and repair ;	K04733|1|1e-151|444|smo:SELMODRAFT_132357|EC[not_get]	cellular_process metabolic_process		binding catalytic_activity
113	Cotton_D_gene_10005887	locus=scaffold227:555502:556766:+ [translate_table: standard]	28616	0.309	4|3|3	14|17|22	CotAD_40319/CotAD_40319/CotAD_40319	Cotton_D_gene_10005887	MALFLCVLFLLLSSASACDRCLHQSKAAYFSKASALSAGACGYGSLALGLSGGHLAAGVSSLYKDGAGCGACFQIRCKNSTLCSSEGTRITLTDLNHNNETDFVLSSRAFMAMANKGMGRDILKLGIVDVEYKRIPCEYKNQNLAVRVEESSQKPNYLAIKLMYQGGQTEVVAMDVAQVGSANWNFMSRNHGAVWDTSRVPNGALQFRFVVTSGFDGKWIWAKSVLPAEWKTGVIYDSGVQITDIAKEGCSPCDDSHWR	82.16	2e-134	gi|255587002|ref|XP_002534094.1|	Beta-expansin 1a precursor, putative [Ricinus communis]	68.69	1e-102	sp|Q9SVE5|EXLA2_ARATH	Expansin-like A2 OS=Arabidopsis thaliana GN=EXLA2 PE=2 SV=1	82.16	2e-133	B9T775	B9T775_RICCO Beta-expansin 1a, putative OS=Ricinus communis GN=RCOM_0235100 PE=3 SV=1	-	-	-	-	-	-	-	-	reproduction
114	Cotton_D_gene_10002161	locus=scaffold383:287860:290448:+ [translate_table: standard]	59968	0.018	-|-|1	-|-|2	-/-/CotAD_36843	Cotton_D_gene_10002161	METLLNPSKTPNLFIPKTHLFKPYFLHSNFNPQPHSSFNRRPLSITITCKVKTSQGRKNDGKNISKKIVLTDSAPELSNEEIKAKPKGGGKAWGVIKKFPKRVLAILSNLPLAIGEMFTVAGLMALGTAIDQGESPEYYFQKYPEENPIFGFFTWRWVLTLGFDHMFSSPVFLGTLILLGTSLMACTYTTQIPLVKVARRWSFLQSANSIRKQEFSDTLPQASVSDLGVILMGAGYEVFLKGPSLYAFKGLAGRFAPIGVHLAMLLIMAGGTLSATGSFRGSVTVPQGLNFVMGDVLGPTGFLSTPTEAFNTEVHVNKFYMDYYDSGEVSQFHTDLSLFDMNGKEVMRKTLSVNDPLRYGGITIYQTDWSFSALQILKDGEGPFNLAMAPLTINGDKKL…	76.84	0	gi|225428564|ref|XP_002281077.1|	PREDICTED: cytochrome c biogenesis protein CCS1, chloroplastic [Vitis vinifera]	70.39	0	sp|Q9XIA4|CCS1_ARATH	Cytochrome c biogenesis protein CCS1, chloroplastic OS=Arabidopsis thaliana GN=CCS1 PE=2 SV=1	76.84	0	D7TPX3	D7TPX3_VITVI Putative uncharacterized protein OS=Vitis vinifera GN=VIT_03s0063g02040 PE=3 SV=1	NMA0659	56.6	7e-08	COG1333	ResB protein required for cytochrome c biosynthesis	O	Posttranslational modification, protein turnover, chaperones ;	K07399|1|0.0|968|tcc:TCM_007279|EC[not_get]	cellular_component_organization_or_biogenesis
115	CotAD_44955	locus=Dt_chr5:14901446:14904607:- [translate_table: standard]	54185.8	0.037	2|-|-	2|-|-	Cotton_D_gene_10014771/-/-	CotAD_44955	MASGSSGRGNTGNSKGFDFGSDDILCSYEDYGNQESSNGNHTEPNSSNKEFHKGRVARSMFPPSGYSQPEDSFSSDVAATVEKTMKRYTDNLMRFLEGISSRLSQLELYCYNLDRSIGDMRADLVHGNGDADSKLKSIEKHLQEVHRSVQILRDKQELAETQKELAKLQLAQKESSSSHSQSTEERVSPPASDPKKTDLTSEMQNQQLAXNPPPAPAQNQHPPSQYLTSDPQYRPPQIQDISRMPTQPTQAQGNQVQSFPQYQQQWPQQLSQQVQPQQQSSMQPQMRAPSTPAYSPYPPTQSTNQSQPEALPNSMAMQVSYSGLPQPVSSRADTITYGYGVPGRTAPQQPPQQIKGTFGAQPTDRYTGPGSNPTFPPGSAYMVYDSEGGRTHHPSQQPN…	59.34	8e-158	gi|462394195|gb|EMJ00099.1|	hypothetical protein PRUPE_ppa004117mg [Prunus persica]	-	-	-	-	60.57	4e-149	I1KFA1	I1KFA1_SOYBN Uncharacterized protein OS=Glycine max PE=4 SV=1	-	-	-	-	-	-	-	K16903|1|1e-23|108|sita:101785211|EC[not_get]!K10896|4|1e-14|80.9|pmum:103319367|EC[not_get]	-	-	-
116	CotAD_72038	locus=Dt_chr11:917796:925409:- [translate_table: standard]	115901	0.043	3|3|4	12|13|20	Cotton_D_gene_10002088;CotAD_73761/Cotton_D_gene_10002088;CotAD_73761/Cotton_D_gene_10002088;CotAD_73761	CotAD_72038	MALRLMMKLPLSSSKGLLFFYLVVLFSCSQSINAQTNQTNATTDPSEVKALISIFQQWDLEAPDTWNISGEPCSGTALTTSFSEFEDPSNNPAIRCDCSFNASTVCHITSLRVFGLDKRGVIPDEILELPYLDFLKIDKNFFSGSLPAFIGNLSRLGLLSIAQNNFSGPIPKEIGNLKKLYLLSLGNNDLSGTLPPELGNLVELGELYINSCGLSGEIPSSFANLKEMRIVWASDNAFTGKIPDFVGNWTKLTQLRFEGNSFEGPIPSSFSNLTSLNSLRIGDIYNGSSSSLDFVRNLKNLTDLVLRNVLLTGNFPSYITELQSLQKLDLSFNNLTGQIPSTLFNMNSLIYLFLGNNSLSGSIPSQKSETLQTIDLSYNFLSGNLPSWVNSRLQLNFVA…	68.97	0	gi|224072359|ref|XP_002303698.1|	predicted protein [Populus trichocarpa]	55.35	0	sp|C0LGH2|Y1561_ARATH	Probable LRR receptor-like serine/threonine-protein kinase At1g56130 OS=Arabidopsis thaliana GN=At1g56130 PE=1 SV=2	68.97	0	B9GY42	B9GY42_POPTR Predicted protein OS=Populus trichocarpa GN=POPTRDRAFT_1074249 PE=4 SV=1	aq_576	67	2e-11	COG0515	Serine/threonine protein kinase	RTKL	General function prediction only ; Signal transduction mechanisms ; Transcription ; Replication, recombination and repair ;	K04733|1|0.0|822|cic:CICLE_v10014641mg|EC[not_get]	metabolic_process		catalytic_activity
117	CotAD_28113	locus=At_chr13:17209468:17210537:+ [translate_table: standard]	19642.4	0.115	1|-|1	1|-|6	-/-/Cotton_D_gene_10003122	CotAD_28113	MASSTVPIGVAVSAPSSVLSNRRISVRFSEFRGLKIKPRLASLTQSTRSAIQDRRRVGRVVCEAQNTAVDVPAIKDETWQSLVLECELPVLVEFWAPWCGPCRMIHPIIDELSKQYAGKLKCYKVNTDESPNIATRYGIRSIPTVMIFKRGEKKDAVIGAVPKSTLTTCIERLL	67.82	7e-67	gi|359493854|ref|XP_002282265.2|	PREDICTED: thioredoxin M4, chloroplastic-like [Vitis vinifera]	62.5	5e-58	sp|Q9SEU6|TRXM4_ARATH	Thioredoxin M4, chloroplastic OS=Arabidopsis thaliana GN=At3g15360 PE=1 SV=2	67.82	1e-65	E0CSM0	E0CSM0_VITVI Putative uncharacterized protein OS=Vitis vinifera GN=VIT_19s0014g02890 PE=4 SV=1	DRA0164	105	8e-29	COG0526	Thiol-disulfide isomerase and thioredoxins	OC	Posttranslational modification, protein turnover, chaperones ; Energy production and conversion ;	K03671|1|3e-82|243|tcc:TCM_031439|EC[not_get]	-	-	-
118	CotAD_75244	locus=scaffold8104.1:691:1917:+ [translate_table: standard]	46992.2	0.025	-|-|1	-|-|1	-/-/-	CotAD_75244	MNKKGLCAFSPTEHAVQLDLIGKVRGFLSAESYFNKLKDQDKTEKTYGALLNCYVRQRQIDKSLSHLQKMKELGFASSTLTYNDIMCLYTNIGQHEKVPDVLREMKENNVSPDNFSYRICINSLGVRSDLEGIEEILTEMEDQPHIKMDWNTYAVVASFYIKAGLTEKAIDALKKSEQKLDNKDGTGYNHLISLYTSLGNKAEVLRLWGLEKEACKRYINKDFIIMLQSLVKLDEFEEAEKILKEWESSGNYYDFRIPNIIIVGYVKKGLHEKAETMLENLKEKGKTTIPNSWGIVAASYLDKGQAKKAFKCMKAALSLFTENKGWKPNLRVVTSILDWLGDEGSVREVEEFVESLKRTVPVDRKMYHTLLKANIRHGERVDKVLDLMKADKINEDEET…	72.79	0	gi|359483464|ref|XP_003632962.1|	PREDICTED: pentatricopeptide repeat-containing protein At4g21705, mitochondrial-like [Vitis vinifera]	60.05	0	sp|Q84JR3|PP334_ARATH	Pentatricopeptide repeat-containing protein At4g21705, mitochondrial OS=Arabidopsis thaliana GN=At4g21705 PE=2 SV=1	72.79	0	F6HRW8	F6HRW8_VITVI Putative uncharacterized protein OS=Vitis vinifera GN=VIT_10s0597g00040 PE=4 SV=1	-	-	-	-	-	-	-	K17710|1|2e-18|90.9|pvu:PHAVU_002G186700g|EC[not_get]	-	-	-
119	CotAD_57033	locus=At_chr13:15708983:15711473:+ [translate_table: standard]	41421.7	0.17	5|4|4	18|11|19	Cotton_D_gene_10039748;CotAD_47108/Cotton_D_gene_10039748;CotAD_47108/Cotton_D_gene_10039748;CotAD_47108	CotAD_57033	MATLQVTSPKELISITASSSLFSSRLRSSSKNSLKKSFLRTRHRFGGIACSFAPMETAKIKVVGVGGGGNNAVNRMIGSGLQGVDFYAINTDSQALLQSAAENPLQIGELLTRGLGTGGNPLLGEQAAEESRDAIANALKGSDLVFITAGMGGGTGSGAAPVVAQIAKEAGYLTVGVALEAIEKLQKNVDTLIVIPNDRLLGIADEQTPLQDAFLLADDVLRQGVQGISDIITIPGLVNVDFADVKAVMKDSGTAMLGVGVSSSKNRAEEAAEQATLAPLIGSSIQSATGVVYNITGGKDITLQEVNRVSQVVTSLADPSANIIFGAVVDDRYNGEIHVTIIATGFSQSFQKTLLTDPKAAKQNDKVAGGQERKGIPLPLKPSSPSTVPSGSSQRRLFF	81.09	0	gi|225460837|ref|XP_002276623.1|	PREDICTED: cell division protein ftsZ homolog 1, chloroplastic-like [Vitis vinifera]	84.88	9e-178	sp|Q42545|FTSZ1_ARATH	Cell division protein FtsZ homolog 1, chloroplastic OS=Arabidopsis thaliana GN=FTSZ1 PE=1 SV=2	86.63	0	H9AY28	H9AY28_MANES FtsZ1 protein OS=Manihot esculenta GN=ftsZ1 PE=2 SV=1	PH0003	246	7e-78	COG0206	Cell division GTPase	D	Cell cycle control, cell division, chromosome partitioning ;	K03531|1|0.0|552|tcc:TCM_030769|EC[not_get]	cellular_process	cell cell_part macromolecular_complex	binding
120	CotAD_13165	locus=Dt_chr8:44222054:44225350:+ [translate_table: standard]	65984.8	0.046	-|1|1	-|1|1	-/Cotton_D_gene_10022523/CotAD_44718;Cotton_D_gene_10022523	CotAD_13165	MASLSFPHFLSLSRWKSNSICYPALNLVRPLDFRLQNKWRLSAKKNADITQDEPSENGAVVKKKTSGTTRRTRKKAKADVLDETGSDNDESTTSVSSEDSKKTPRRTRKKVASASTTDIEPEPEKRVRRRRTMKKDGEADGQSGESEISDTEESTLMTNSGDESEEDLELNIDEGEDISYTYGWPPLVCCFGAAQHAFVPSGRPANRLIDYEIHERMKDARWAPEKLVRAPGGCAGSVALALASLGGKVAFMGKLGNDDYGQAMLLYLNVNNVQTRSVQIDSKRPTAISQMKISKRGRLRMTSLKSCAEDSLSKSEINIDVLKEAKMFYFNTHSLLDRNMRSTTLRAIKMSKKLGGVIFYDVTLPLPLWQSDEETKMFIQEAWNLVDFIEVTKQELEFL…	66.96	0	gi|462419856|gb|EMJ24119.1|	hypothetical protein PRUPE_ppa003690mg [Prunus persica]	31.82	6e-36	sp|Q42896|SCRK2_SOLLC	Fructokinase-2 OS=Solanum lycopersicum GN=FRK2 PE=2 SV=2	66.09	0	D7T9Y5	D7T9Y5_VITVI Putative uncharacterized protein OS=Vitis vinifera GN=VIT_01s0011g00240 PE=4 SV=1	BH2319	53.9	3e-07	COG0524	Sugar kinases, ribokinase family	G	Carbohydrate transport and metabolism ;	K00847|1|6e-38|147|atr:18433999|EC[not_get]			catalytic_activity
121	Cotton_D_gene_10009438	locus=scaffold141:845996:848980:+ [translate_table: standard]	40320.7	0.357	3|-|4	23|-|24	CotAD_10507/-/-	Cotton_D_gene_10009438	MQRLVLLSVLLCASCHISLSLTNGLLENGNFENAPNATNMKGTVVVGRYSIPGWVNEGFVEYIKSGQKQGDMLLVVPEGAYAVRLGNEASIKQKIKVIKGMYYSITFSAARTCAQEERLNVTVAPDSGVLPIQTVYSSSGWDNYAWAFKAIYEVAELIIHNPGVEEDPACGPLIDAVAIKALYPPRPTNKNSVKNGGFEEGPYVFPNTPWGVLIPPNIEDDHSPLPAWIVESLKAVKYIDSAHYFVPQGRRAVELVAGKESAIAQIVRTIVGKMYRLSFAVGDANNSCVGSLVVEAFAGKDTLKVPYESKGKGGFKRAELKFKAVSNRTRIMFLSTFYTMRSDDFSSLCGPVLDDVKLLSIQTSPNP	79.49	0	gi|225430200|ref|XP_002284962.1|	PREDICTED: uncharacterized protein LOC100252479 [Vitis vinifera]	-	-	-	-	79.49	0	F6H3T7	F6H3T7_VITVI Putative uncharacterized protein OS=Vitis vinifera GN=VIT_04s0008g05010 PE=4 SV=1	-	-	-	-	-	-	-	-	-	-	-
122	CotAD_44188	locus=At_chr7:28990666:28997523:+ [translate_table: standard]	98639.7	0.318	1|2|3	1|8|13	-/-/-	CotAD_44188	MLFRLGIFLSLLSLFLIRSESAVSSIDLGSEWLKVAVVNLKPGQSPITIAINEMSKRKSPALVAFQSETRLLGEEAAGIVARYPDKVFSNLRDMIGKPYQDVKRSADSMYLPFDVVEDSRGAAKIRVSSDVSYSVEELLGMILKYASNLAEFHSKMTVKDAVISVPPYFGQAERKGLLKAAEMAGINVISLINEHSGAALQYGIDKDFSNESRHVILYDMGSSSTYAALIFYSAYNAKEFGKTVSVNQFQVKDVRWDSELGGQNMELRLVEYFADEFNKQVGNGVDVRKHPKAMAKLKKQVKRTKEILSANTAAPISVESLYDDRDFRSTITREKFEELCADLWDKSLVPVKEVLKHSGLKADDIYAVELIGGATRVPKLQATLQEYFGRKDLDKHLDA…	76.7	0	gi|255559152|ref|XP_002520598.1|	Heat shock 70 kDa protein, putative [Ricinus communis]	73.29	0	sp|F4JMJ1|HSP7R_ARATH	Heat shock 70 kDa protein 17 OS=Arabidopsis thaliana GN=HSP70-17 PE=2 SV=1	76.7	0	B9S3M9	B9S3M9_RICCO Heat shock 70 kDa protein, putative OS=Ricinus communis GN=RCOM_0673570 PE=3 SV=1	RC0233	180	2e-47	COG0443	Molecular chaperone	O	Posttranslational modification, protein turnover, chaperones ;	K09486|1|0.0|1422|tcc:TCM_044595|EC[not_get]	metabolic_process response_to_stimulus		binding catalytic_activity
123	CotAD_63955	locus=At_chr5:52814108:52815335:- [translate_table: standard]	19659.8	0.141	2|2|2	13|12|4	-/-/-	CotAD_63955	MGAFTLPRSSRPSPSVPGRHRSFLCPSLRPKTSEVSIDICGVDHPSQKRRFEVVYNLLSTQYNSRIHVQTSADEVTRISPVVSIFPSAGRWEREVWDMFGVSSINHPDLRRISTNYGFEGHPLRKDLPLSGYVEVRYDDPEKRVVSEPIEMTQEFRYFDFASPWEQRSDG	94.89	4e-93	gi|323149051|ref|YP_004222820.1|	NADH dehydrogenase subunit 9 [Vigna radiata]	89.78	2e-87	sp|Q95748|NDUS3_ARATH	NADH dehydrogenase [ubiquinone] iron-sulfur protein 3 OS=Arabidopsis thaliana GN=NAD9 PE=1 SV=2	94.89	6e-92	E9KZM7	E9KZM7_VIGRA NADH dehydrogenase subunit 9 OS=Vigna radiata GN=nad9 PE=3 SV=1	STM2326_1	68.9	2e-14	COG0852	NADH:ubiquinone oxidoreductase 27 kD subunit	C	Energy production and conversion ;	K03936|1|3e-93|273|eus:EUTSA_v10022839mg|EC[not_get]	cellular_process metabolic_process single-organism_process	cell cell_part macromolecular_complex membrane membrane_part organelle organelle_part	binding catalytic_activity
124	Cotton_D_gene_10009297	locus=scaffold367:514667:518001:+ [translate_table: standard]	29903.5	0.125	2|-|-	21|-|-	CotAD_22306/-/-	Cotton_D_gene_10009297	MATTTAATVSHFFGTRIQTSNPSSGRIQARFGFGTKKAPPPPKKAAPKRPSDRLVWFPGANPPEWLDGTMIGDRGFDPFGFAKPAEYLQYDLDSLDQNLAKNVAGDIIGVISETAELKPTPFQPYTEVFGIQRFRECELIHGRWAMLGTLGAIAVEALTGVAWQDAGKVELVEGASYLGQPLPFSLTTLIWIEVLVIGYIEFQRNAELDPEKRLYPGGYFDPLGLASDPEKIDNLKLAEIKHSRLAMIAFLIFGIQAAYTGKGPISFIASFNS	80	9e-159	gi|224101127|ref|XP_002312153.1|	light-harvesting complex II protein Lhcb8 [Populus trichocarpa]	81.16	8e-158	sp|Q9S7W1|CB4C_ARATH	Chlorophyll a-b binding protein CP29.3, chloroplastic OS=Arabidopsis thaliana GN=LHCB4.3 PE=1 SV=1	80	1e-157	B9HHN0	B9HHN0_POPTR Light-harvesting complex II protein Lhcb8 OS=Populus trichocarpa GN=Lhcb8 PE=4 SV=1	-	-	-	-	-	-	-	K08915|1|3e-167|466|tcc:TCM_042535|EC[not_get]	cellular_process metabolic_process response_to_stimulus	cell cell_part macromolecular_complex organelle organelle_part	binding
125	CotAD_75528	locus=At_chr10:58764609:58765905:+ [translate_table: standard]	19843.5	0.448	-|6|6	-|91|89	-/CotAD_32005;Cotton_D_gene_10020657;CotAD_47771;Cotton_D_gene_10031470;CotAD_51648;CotAD_20242;CotAD_25723;CotAD_51354;Cotton_D_gene_10033666;CotAD_05658;Cotton_D_gene_10000480;CotAD_00572/CotAD_32005;Cotton_D_gene_10020657;CotAD_47771;Cotton_D_gene_10031470;CotAD_51648;CotAD_20242;CotAD_25723;CotAD_51354;Cotton_D_gene_10033666;CotAD_05658;Cotton_D_gene_10000480;CotAD_00572	CotAD_75528	MREIKVQKLVLNISVGESGDRLTRAAKVLEQLSGQTPVFSKARYTVRSFGIRRNEKIACYVTVRGEKAMQLLESGLKVKEYELLRRNFSDTGCFGFGIQEHIDLGIKYDPSTGIYGMDFYVVLERAGYRVGRRRRCKSRVGIQHRVTKEDAMKWFQVKYEGVILNKSQNIGA	99.42	7e-109	gi|188509981|gb|ACD56663.1|	putative ribosomal protein [Gossypium arboreum]	96.47	2e-106	sp|P42795|RL111_ARATH	60S ribosomal protein L11-1 OS=Arabidopsis thaliana GN=RPL11A PE=1 SV=2	99.42	9e-108	B2ZAU6	B2ZAU6_GOSAR Putative ribosomal protein OS=Gossypium arboreum PE=3 SV=1	RP647	68.2	3e-14	COG0094	Ribosomal protein L5	J	Translation, ribosomal structure and biogenesis ;	K02868|1|6e-109|311|tcc:TCM_001743|EC[not_get]	metabolic_process	cell cell_part macromolecular_complex	structural_molecule_activity
126	Cotton_D_gene_10009889	locus=scaffold240:730950:732848:- [translate_table: standard]	72518	0.024	2|-|-	2|-|-	-/-/-	Cotton_D_gene_10009889	MSPPSLLGPPELRHPTPPKPETTVVTTTTKVPSDPFMDLMLANFNEANNTPSMGFTENNSATYLATGNPCLDFFFHVVPNSPPDSIKEMLGRAWNFDPLMTLKLICNLRGVRGTGKSDKEGFYTAAFWLHDHHPKTLACNLDSFVNFGYFKDLPEILYRMLEGSTVRQVQKHDWLIRKQGKFRGGSRCYSKKQKVEKSKPTGATNPNLEKAKARDLRKEKKISMAKKVIERYSRDPDFRFLYECVSDLFAACLKSDMEFLKSNETRKIGLAAKWCPSIDSSFDKSTLLCESISRKIFSRENYPEYEGIDEEHYAYRVRDRLRKDVLVPLRKVLELPEVYIGANKWDSIPYNRVASIAMKFYKEKFLKHDKDRFSKYLEDVKAGKSTIAAGALLPHEIIA…	68.13	0	gi|462406755|gb|EMJ12219.1|	hypothetical protein PRUPE_ppa020333mg [Prunus persica]	32.22	2e-56	sp|Q5UNY4|YL728_MIMIV	Uncharacterized protein L728 OS=Acanthamoeba polyphaga mimivirus GN=MIMI_L728 PE=4 SV=1	67.68	0	B9GZA8	B9GZA8_POPTR Predicted protein OS=Populus trichocarpa GN=POPTRDRAFT_757838 PE=4 SV=1	-	-	-	-	-	-	-	K00640|1|5e-33|132|pop:POPTR_0015s12840g|EC[not_get]!K13126|2|2e-11|70.9|pmum:103336271|EC[not_get]	-	-	-
127	CotAD_58452	locus=scaffold2181.1:145350:148053:+ [translate_table: standard]	30516	0.136	4|-|-	13|-|-	Cotton_D_gene_10003286/-/-	CotAD_58452	MVNAILYHQTSPLLLFQCCSSSHPPHIPRGLPGKLTLNCSIKSPPNKVIASHIVSGLASLIFLSQTNQVLAADLSHDPSICQLASATDNELTLPLEEDSGEGNGKLMMMRGMTAKNFDPVRYSGRWFEVASLKRGFAGQGQEDCHCTQGVYTFDMKTPAIQVDTFCVHGGPDGYITGIRGKIYSRTPNPGHEFIEKYKSYLSNYGYDPSKIKDTPQDCQVMSNSQLAAMMSMPGMQQALTNEFPDLELKAPVAFNPFTSVFDTLKKLLELYFK	51.03	2e-103	gi|462407428|gb|EMJ12762.1|	hypothetical protein PRUPE_ppa008302mg [Prunus persica]	-	-	-	-	53.35	5e-96	B9I7M9	B9I7M9_POPTR Predicted protein OS=Populus trichocarpa GN=POPTRDRAFT_571517 PE=4 SV=1	-	-	-	-	-	-	-	-	-	-	-
128	CotAD_29356	locus=Dt_chr11:19817624:19822182:- [translate_table: standard]	45474	0.256	5|-|5	18|-|12	Cotton_D_gene_10036404/-/Cotton_D_gene_10036404	CotAD_29356	MALKFNPITFQSQKLPSFALPPMAGLRSPKFFMASTLRSGSKEVDLKKPFMPPREVHVQVTHSMPPQKIEIFKSLEDWAENNILTYLKPVEKCWQPQDFLPDPASDGFHEQVKELRERAKEIPDDYFVVLVGDMITEEALPTYQTMLNTLDGVRDETGASLTPWAIWTRAWTAEENRHGDLLNKYLYLSGRVDMRQIEKTIQYLIGSGMDPRTENNPYLGFIYTSFQERATFISHGNTARLAKEHGDIKLAQICGNIASDEKRHETAYTKIVEKLFEIDPDGTVLAFADMMRKKISMPAHLMYDDQDDNLFDNFSAVAQRLGVYTARDYADILEFLVNKWKVTELTGLSADGRKAQDYVCGLPPRIRRLEERAQGRAKEAPRVPFSWIFDREVQL	91.16	0	gi|156122762|gb|ABU50334.1|	stearoyl-ACP desaturase [Vernicia montana]	90.15	0	sp|P22337|STAD_RICCO	Acyl-[acyl-carrier-protein] desaturase, chloroplastic OS=Ricinus communis PE=1 SV=1	91.16	0	A7UHZ0	A7UHZ0_9ROSI Acyl-[acyl-carrier-protein] desaturase OS=Vernicia montana GN=SAD PE=2 SV=1	-	-	-	-	-	-	-	K03921|1|0.0|768|tcc:TCM_019858|EC[not_get]	cellular_process metabolic_process single-organism_process	cell cell_part organelle	binding catalytic_activity
129	Cotton_D_gene_10000330	locus=scaffold534:22273:27415:+ [translate_table: standard]	153367	0.041	3|2|2	3|6|6	CotAD_43305;CotAD_20559/CotAD_43305;CotAD_20559/CotAD_43305;CotAD_20559	Cotton_D_gene_10000330	MASLVSSPFTLPASKADQLSSLSQKHFFLHSFLPKKINNLPNSKSSLKVKCAAVGNGLFTQTTPEVRRIVPENKNNLPTVKIVYVVLEAQYQSSLSSAVQSLNQNSNFASFEVVGYLVEELRDENTYKTFCKDLEDANIFIGSLIFVEELALKVKTAVEKERDRLDAVLVFPSMPEVMRLNKLGSFSMSQLGQSKSPFFQLFKRKKQGAGFADSMLKLVRTLPKVLKYLPSDKAQDARLYILSLQFWLGGSPDNLQNFLKMISSSYVPALKGTKVDYSDPVLFLDSGIWHPLAPCMYDDVKEYLNWYGTRRDVNEKLRGPDAPVIGLVLQRSHIVTGDESHYVAVIMELEAKGAKVIPIFAGGLDFSGPVERFLIDPVTKKPMVNSVVSLTGFALVGGP…	92.56	0	gi|356534764|ref|XP_003535922.1|	PREDICTED: magnesium-chelatase subunit H-like [Glycine max]	87.35	0	sp|Q9FNB0|CHLH_ARATH	-	92.56	0	I1LAA1	I1LAA1_SOYBN Uncharacterized protein OS=Glycine max GN=Gma.12621 PE=4 SV=1	alr4733	365	1e-105	COG1429	Cobalamin biosynthesis protein CobN and related Mg-chelatases	H	Coenzyme transport and metabolism ;	K03403|1|0.0|2737|tcc:TCM_024638|EC[not_get]	cellular_process metabolic_process		catalytic_activity
130	CotAD_53875	locus=scaffold862.1:62031:69655:- [translate_table: standard]	106480	0.047	3|-|3	3|-|3	Cotton_D_gene_10020043;Cotton_D_gene_10013535;CotAD_15448;CotAD_08692/-/Cotton_D_gene_10020043;CotAD_08692	CotAD_53875	MLKLLSSTSSRVHCLTTPTPSLRIKQEPNSLFYALGRLIGLTQRSPKNSFFRACFCSDSSDGSGSGSGSQPAVEVDEKGAESQSGSDSKASSAIVSTYPKPEDYLTVLALPLPHRPLFPGFYMPIYVKDPKLLAALQESRKRQAPYAGAFLLKDEPGTESSTSSETEKTVYDIKGKELFNRLHEVGTLAQISSIQGDQVILIGHRRLRITEMVSEDPLTVKVDHLKEKPYNKDDDVIKATSFEVISTLRDVLKTSSLWRDHVQTYSQHIGDFNFPRLADFGAAISGANKLQCQQVLEELDVHKRLQLTLELVKKEMEISKIQESIAKAIEEKISGEQRRYLLNEQLKAIKKELGLETDDKTALSAKFKERLEPNREKCPPHVLQVIEEELTKLQLLEAS…	80.12	0	gi|462400603|gb|EMJ06160.1|	hypothetical protein PRUPE_ppa000809mg [Prunus persica]	77.46	0	sp|P93655|LONM1_ARATH	Lon protease homolog 1, mitochondrial OS=Arabidopsis thaliana GN=LON1 PE=1 SV=2	81.09	0	B9I6Z6	B9I6Z6_POPTR Lon protease homolog OS=Populus trichocarpa GN=POPTRDRAFT_894071 PE=3 SV=1	aq_242	383	7e-119	COG0466	ATP-dependent Lon protease, bacterial type	O	Posttranslational modification, protein turnover, chaperones ;	K08675|1|0.0|1630|tcc:TCM_026762|EC[not_get]	metabolic_process		binding catalytic_activity
131	CotAD_18928	locus=At_chr6:55915193:55918238:+ [translate_table: standard]	54203.4	0.021	-|-|1	-|-|1	-/-/Cotton_D_gene_10010104;CotAD_03286;CotAD_47590;Cotton_D_gene_10033256;CotAD_53524	CotAD_18928	MLPQKQAEEAIVSNFSETGHETREEENEDEQQQSMFSVTSLLWHGGSAWDAWFSCASNQVAQVLLTLPYSFSQLGMLSGILLQVFYGLMGSWTAYLISVLYIEYRSRKEKENVSFKNHVIQWFEVLDGLLGPYWKAAGRALNCTFLLFGSVIQLIACASNIYYINDKLDKRTWTYIFGACCATTVFIPSFHNYRIWSFIGLGMTTYTAWYMAIAAVLHGQAEGVTHSGPTKLVLYFTGATNILYTFGGHAVTVEIMHAMWKPQKFKCIYLLATLYVFTLTIPSASAVYWAFGDQLLNHSNAFSLLPKTGFRDAAVILMLIHQFITFGFACTPLYFVWEKVIGMHDTRSICSRALARLPVVIPIWFLAIIFPFFGPINSAVGALLVSFTVYIIPALAHML…	89.83	0	gi|365189136|emb|CCF23025.1|	auxin influx carrier protein [Mangifera indica]	87.61	0	sp|Q9FEL7|LAX2_MEDTR	Auxin transporter-like protein 2 OS=Medicago truncatula GN=LAX2 PE=2 SV=1	89.83	0	G9AYK2	G9AYK2_MANIN Auxin influx carrier component OS=Mangifera indica GN=aux1 PE=2 SV=1	-	-	-	-	-	-	-	K13946|1|0.0|851|tcc:TCM_021727|EC[not_get]		membrane membrane_part
132	CotAD_24510	locus=scaffold238.1:615637:618342:+ [translate_table: standard]	29192.8	0.102	-|1|1	-|2|1	-/CotAD_11892/CotAD_11892	CotAD_24510	MSCDSSITKRLDGKVALITGGASGLGKCTATLFVKHGAKVLIADIQDELGDSVCQELGTENISYVHCDITCESDVENAVNLAVSKYGKLDIMFNNAGTHGDNETRVTHASTEDFKKVFDINVLGGFLGAKYAARVMVPAKKGCILFTSSLASKISFGSPHAYKASKHAVAGLTKSLAVELGEHGIRVNSISPHAISTPMFQKSIGIPDKKKGEEMIAASAVLKGTVLEPEDFAHAALYLASDEAKFISGVNLPLDGGYSLSNQSWKLGFAALFG	96.7	0	gi|89258498|gb|ABD65462.1|	short chain alcohol dehydrogenase [Gossypium hirsutum]	50.76	1e-87	sp|F1SWA0|ZERSY_ZINZE	-	96.7	0	B9MST7	B9MST7_GOSHI Short chain alcohol dehydrogenase OS=Gossypium hirsutum PE=2 SV=1	BS_ycdF	124	1e-33	COG1028	Dehydrogenases with different specificities (related to short-chain alcohol dehydrogenases)	IQR	Lipid transport and metabolism ; Secondary metabolites biosynthesis, transport and catabolism ; General function prediction only ;	K09841|1|3e-86|261|pop:POPTR_0001s06170g|EC[not_get]	metabolic_process		catalytic_activity
133	CotAD_46083	locus=At_chr3:7973333:7975102:+ [translate_table: standard]	39106	0.08	-|1|1	-|3|1	-/CotAD_06577;Cotton_D_gene_10039067;CotAD_59461/-	CotAD_46083	MAETLSQGTPTLFSPYKMGKGVLVPMTRCRALNGIPRPALAEYYMQRSTPGGFLITEGTLVSDTAAGFPHVPGIYNDQQVEGWKKIVDAVHAKGSIIFCQLWHVGRASHSELYKSRKYQRFVQHYRTAALNAIRAGFDGIEIHGAHGYLIDQFLKDGINDRRDEYGGSLANRCKFLMQIVGSVAEAVRADRIAVRISPAIDHLDATDTNPLNLGLAVIERLNELQLKLGSKLAYLHVTQPRYHAYGQTESGRHGSEDEEAHLMRTLKRSYEGTFMCSGGFTRELGMQAVAEGDADLVSYGRLFISNPDLVFRLRINAPLNRYIRKTFYTQDPVVGYTDYPFLVVQSRL	69.19	0	gi|356547929|ref|XP_003542357.1|	PREDICTED: 12-oxophytodienoate reductase 3-like [Glycine max]	66.49	0	sp|Q9FEW9|OPR3_SOLLC	12-oxophytodienoate reductase 3 OS=Solanum lycopersicum GN=OPR3 PE=1 SV=1	69.19	0	I1LY51	I1LY51_SOYBN Uncharacterized protein OS=Glycine max GN=Gma.19161 PE=4 SV=1	STM1436	193	3e-58	COG1902	NADH:flavin oxidoreductases, Old Yellow Enzyme family	C	Energy production and conversion ;	K05894|1|0.0|608|tcc:TCM_037547|EC[not_get]	metabolic_process		catalytic_activity
134	CotAD_52642	locus=At_chr8:48080410:48100179:+ [translate_table: standard]	91338.6	0.061	1|-|-	1|-|-	-/-/-	CotAD_52642	MRIIRHIPNTVLFNTIFVSVNILMASTRFSLSRSVQPILKRPPFSSSPRFAPKALLKSYPCPLWSSSFSFCVQTLHHSTSPYLSSSSSSSSSSFSSCSSFSPPSMASSFTVDDSVGSNPLLQDFDFPPFDIVEAKHVRPGIRALLKKVESDLDELEKTVEPSWPKLVEPLEKIVDRLTVVWGMVNHLKAVKDSAELRAAIEEVQPEKVKFQLRLGQSKPIYNAFKAIKESPDWQSLSEARKRIVDAQIKEAVLNGVSLEDDKREQFNKIQQELERLSHKFSENVLDATKKFEKLVTDKKEIDGLPATALGLAAQTAVSKGHENATAENGPWMITLDAPIFISVMQHARNRALREEVYRAYITRASSGDLDNTPIINQILKLRLEKAKLLNYNNYAEISM…	81.63	0	gi|255572579|ref|XP_002527223.1|	oligopeptidase A, putative [Ricinus communis]	41.67	8e-175	sp|P44573|OPDA_HAEIN	Oligopeptidase A OS=Haemophilus influenzae (strain ATCC 51907 / DSM 11121 / KW20 / Rd) GN=prlC PE=3 SV=1	81.63	0	B9SMK4	B9SMK4_RICCO Oligopeptidase A, putative OS=Ricinus communis GN=RCOM_0230710 PE=3 SV=1	XF1944	309	3e-93	COG0339	Zn-dependent oligopeptidases	E	Amino acid transport and metabolism ;	K01414|1|0.0|1303|cic:CICLE_v10024919mg|EC[not_get]	metabolic_process		catalytic_activity
135	CotAD_27947	locus=Dt_chr11:17391405:17392620:- [translate_table: standard]	28991.6	0.727	2|1|2	3|1|6	-/-/-	CotAD_27947	MASTACFLHHHALAAAPRSSSTPPSTSQRQVAIVKSNQLLACTSQKQAVQENDDSGSNAVISRRLALTLLIGTAAVGSKVSPADAAYGEAANVFGKPKTNTEFIPYNGEGFKLSIPSKWNPSKEVEYPGQVLRYEDNFDSTTNVAVLVTPTDKKSITDFGSPENFLSKVDYLLGKQAYSGLTDAEGGFDSNAVATANILETSTPVIGGKQYYFLSVLTRTADGDEGGKHQLITATVNNGKLYICKAQAGDKRWFKGARKFVESAANSFSVA	77.86	4e-144	gi|356526942|ref|XP_003532074.1|	PREDICTED: oxygen-evolving enhancer protein 2, chloroplastic-like [Glycine max]	78.84	2e-139	sp|P29795|PSBP_SOLLC	Oxygen-evolving enhancer protein 2, chloroplastic OS=Solanum lycopersicum GN=PSBP PE=2 SV=1	77.86	6e-143	I1KXW9	I1KXW9_SOYBN Uncharacterized protein OS=Glycine max GN=Gma.55269 PE=4 SV=1	-	-	-	-	-	-	-	K02717|1|5e-149|420|mus:103990328|EC[not_get]	cellular_process metabolic_process	cell cell_part macromolecular_complex membrane membrane_part organelle organelle_part	binding
136	Cotton_D_gene_10038662	locus=scaffold3:2318911:2319441:+ [translate_table: standard]	20012.9	0.068	1|1|1	3|2|2	-/-/-	Cotton_D_gene_10038662	MHEALEEGYDMPEQLDKPPCDSDEMPSSTTTKTLNSEVLLNMLDMTTQMMKMFQEISEVLPPRKEVVTDVHNFDHGDPHIIINHDKIHGEIQREFGTRDHGDKLNILEAVFDPIDIEIDVIVKVEVKDEITIDIKLQLILNESVEEPIHLLAIVGEVPTEKVEEFVSVSFENGSKA	-	-	-	-	-	-	-	-	-	-	-	-	-	-	-	-	-	-	-	-	-	-	-
137	Cotton_D_gene_10018096	locus=scaffold152:1203548:1207007:- [translate_table: standard]	63859.6	0.095	4|3|4	7|6|5	CotAD_31241;CotAD_08937/CotAD_31241;CotAD_08937/CotAD_31241;CotAD_08937	Cotton_D_gene_10018096	MTALCFTSHASLSSCNLHTHPYKKKHGFNFNNFGSNLSTIINKTQSSNPRISIHFSVNRRQFPLKSSVKDEQATETEPTAHSPVAVESKEPSDETHGPNSEETEGKEDQQEMDWKTDEEFKRFMGNPSIEAAIKLEKKRADSKLKELDRESNGNPIVGLFNKVVRDNLAREKERLEQAEETFKALDLNKLKSCFGFDTFFATDVRRFGDGGIFIGNLRRPIEEVIPILEKKLTKAAGREVVLWFMEEKTNDITKQACVVQPKAEIDLQFESTKLSTPWGYVSATALCVTTFGTIALMSGFFLKPGATFDDYLADVLPLFGGFISILAVSEIATRVTAARYGVKLSPSFLVPSNWTGCLGVMNNYESLLPNKKALFDIPVARTASAYLTSLVLAIAAFIS…	83.59	0	gi|255562204|ref|XP_002522110.1|	sterol regulatory element-binding protein site 2 protease, putative [Ricinus communis]	-	-	-	-	83.59	0	B9S7Z4	B9S7Z4_RICCO Sterol regulatory element-binding protein site 2 protease, putative OS=Ricinus communis GN=RCOM_1382980 PE=4 SV=1	Ta1344m	58.9	1e-08	COG0750	Predicted membrane-associated Zn-dependent proteases 1	M	Cell wall/membrane/envelope biogenesis ;	-			catalytic_activity
138	Cotton_D_gene_10030320	locus=scaffold23:3422878:3423977:- [translate_table: standard]	23482.6	0.069	-|1|-	-|1|-	-/CotAD_19418/-	Cotton_D_gene_10030320	MELDDVGVRTIAMAEESATEAVRNKRRRFNDDDEGEAAECKVTSSTTSYIQLRSRRILVDHHPRNENQCLSLARTMMMTCHVVQALSARAEKGLSNGQIRRMGALKLNHPRISATETANSSRRETTPLSELRAEPEDMDPTSRPSGGNSRRRSMVEKMPTEAELEEFFVVAEEKLRNQFAEKYNYDILKDQPLEGRYEWARLKP	44.94	1e-19	gi|296082434|emb|CBI21439.3|	unnamed protein product [Vitis vinifera]	65.52	3e-07	sp|Q94CL9|KRP7_ARATH	Cyclin-dependent kinase inhibitor 7 OS=Arabidopsis thaliana GN=KRP7 PE=1 SV=2	44.94	1e-18	D7SVZ0	D7SVZ0_VITVI Putative uncharacterized protein OS=Vitis vinifera GN=VIT_07s0031g00800 PE=4 SV=1	-	-	-	-	-	-	-	-	-	-	-
139	Cotton_D_gene_10031847	locus=scaffold9:1544195:1547156:+ [translate_table: standard]	34557.2	0.262	1|2|1	2|2|3	CotAD_01372/CotAD_01372/CotAD_01372	Cotton_D_gene_10031847	MESIGVLMACPMNSYLEQQLENRFKLFRFWTVPDKSSFLASHKDSIQAVVGNAFAGADAKLIEALPKLEIVSSFSVGLDKIDLATCKEKGIRVTNTPDVLTEDVADLAIGLMLAVLRKLCESDRFVRSGKWKRGQYVLTTKFTGKRVGIIGLGRIGMAIATRAEAFSCPISYYSRTEKPEIKYKYYPSVVELAANCDILVVACALTTETHHIINREVIDALGPKGVLINIGRGPHVDEPELVSALVEHRLGGAGLDVFEHEPEVPEELFGLDNVVLLPHVGSGTVETRQAMADLVIGNLEAHFLKKPLLTPVV	81.79	0	gi|460379844|ref|XP_004235670.1|	PREDICTED: glyoxylate/hydroxypyruvate reductase A HPR2-like [Solanum lycopersicum]	78.27	2e-176	sp|Q9CA90|HPR2_ARATH	-	81.85	0	B9RQK9	B9RQK9_RICCO Glycerate dehydrogenase, putative OS=Ricinus communis GN=RCOM_1493920 PE=3 SV=1	PA2263	181	3e-54	COG1052	Lactate dehydrogenase and related dehydrogenases	CHR	Energy production and conversion ; Coenzyme transport and metabolism ; General function prediction only ;	K15919|1|0.0|580|tcc:TCM_028760|EC[not_get]	metabolic_process		binding catalytic_activity
140	CotAD_72620	locus=At_chr6:42911714:42916330:- [translate_table: standard]	40621.3	0.217	-|1|-	-|1|-	-/-/-	CotAD_72620	MEMITNVSEYEVIAKEKLPKMVYDYYASGAEDQWTLKENRNAFSRILFRPRILIDVSKINMMTTILGFRISMPIMVAPTAMQKMAHPEGECATARAASDAGTIMTLSTYANSSVEEVASTRSGIRFFQLYVHKDRNLVAQLVRRAERAGFKAIALTADTPRLGRREADIKNRFNLPPYLTLKNFEGLDLGKIDKTDDSGLASYAANQIDQSLSWKDVKWLQTITSLPILVKGVLTAEDTKLAIEAGAAGIIVSNHGARQLDYVPATIMALEEVVKAAQGKVPVFLDGGVRRGTDVFKALALGASGVFIGRPVVFALAVDGEAGVRKVLQMLHDELELTMALSGCRSLKEITRNHVVADWDHPRVLPRL	89.04	0	gi|366984550|gb|AEX09184.1|	glycolate oxidase [Gossypium hirsutum]	84.47	0	sp|P05414|GOX_SPIOL	Peroxisomal (S)-2-hydroxy-acid oxidase OS=Spinacia oleracea PE=1 SV=1	89.04	0	H2D5S6	H2D5S6_GOSHI Glycolate oxidase OS=Gossypium hirsutum GN=GOX PE=2 SV=1	lldD	228	4e-71	COG1304	L-lactate dehydrogenase (FMN-dependent) and related alpha-hydroxy acid dehydrogenases	C	Energy production and conversion ;	K11517|1|0.0|661|tcc:TCM_029459|EC[not_get]	metabolic_process		binding catalytic_activity
141	Cotton_D_gene_10020430	locus=scaffold106:421146:423420:+ [translate_table: standard]	40167.6	0.036	-|-|1	-|-|1	-/-/-	Cotton_D_gene_10020430	MDSSTPPSCQNQNSQPNSELLRFLSAPSSLLAPFSESLDTGLSKGGPHSDRLIYRFMNPSQDKSGTEATVDHANSRQTFPGLPPHYPRQTSSAMDTSYFLLGMDPRCGKPGTSSLLRQSSSPPGLFTNLSVQTGLGSYTNGELSPSSSNRLKNQISFSSRLPSSLGILSQISEIGDDAKLGTGYQYGSWNDSANFPENFSGSKTTQDNDPNFFSANQNSDSGSRLHVLSHHLSLPKTSNETPAMEKFLSFQDSVPCKIRAKRGCATHPRSIAERVRRTRISERMRKLQELVPNMDKQTNTADMLDLAVDYINDLQKQFKTLSDRRANCKCLNIRAPNDDPTIGMMDQYPSTTTITHLRSKSI	59.81	4e-102	gi|255583282|ref|XP_002532405.1|	DNA binding protein, putative [Ricinus communis]	53.42	1e-84	sp|Q66GR3|BH130_ARATH	Transcription factor bHLH130 OS=Arabidopsis thaliana GN=BHLH130 PE=1 SV=1	59.81	5e-101	B9T2D6	B9T2D6_RICCO DNA binding protein, putative OS=Ricinus communis GN=RCOM_0405730 PE=4 SV=1	-	-	-	-	-	-	-	K11253|1|2e-11|65.9|pop:POPTR_0002s10030g|EC[not_get]!K12126|2|4e-11|61.6|smo:SELMODRAFT_114141|EC[not_get]	-	-	-
142	CotAD_24274	locus=Dt_chr9:3117331:3117588:+ [translate_table: standard]	10163.5	0.094	-|1|1	-|1|1	-/CotAD_27716/CotAD_27716	CotAD_24274	MNEETGSSHHRYSSHYLNSCCDELENLREDCRCQGLKQALGQQLKLQGVRWESPEAEDMCEAAETALNRCGLESRRCDMHSGRWL	-	-	-	-	-	-	-	-	-	-	-	-	-	-	-	-	-	-	-	-	-	-	-
143	CotAD_19709	locus=At_chr1:85184085:85185856:+ [translate_table: standard]	41899	0.491	1|-|-	15|-|-	CotAD_19706;CotAD_19704;Cotton_D_gene_10032884;CotAD_05357;Cotton_D_gene_10032882/-/-	CotAD_19709	MADGEDIQPLVCDNGTGMVKAGFAGDDAPRAVFPSIVGRPRHTGVMVGMGQKDAYVGDEAQSKRGILTLKYPIEHGIVSNWDDMEKIWHHTFYNELRVAPEEHPVLLTEAPLNPKANREKMTQIMFETFNVPAMYVAIQAVLSLYASGRTTGIVLDSGDGVSHTVPIYEGYALPHAILRLDLAGRDLTDALMKILTERGYMFTTTAEREIVRDMKEKLAYVALDYEQELETAKSSSSVEKNYELPDGQVITIGAERFRCPEVLFQPSFIGMEAAGIHETTYNSIMKCDVDIRKDLYGNIVLSGGSTMFPGIADRMSKEITALAPSSMKIKVVAPPERKYSVWIGGSILASLSTFQQMWISKGEYDESGPSIVHRKCF	100	0	gi|32186890|gb|AAP73449.1|	actin [Gossypium hirsutum]	98.67	0	sp|P53492|ACT7_ARATH	Actin-7 OS=Arabidopsis thaliana GN=ACT7 PE=1 SV=1	100	0	Q7XZK0	Q7XZK0_GOSHI Actin OS=Gossypium hirsutum GN=ACT2 PE=2 SV=1	ECU04g1090	58.2	7e-09	COG5277	Actin and related proteins	Z	Cytoskeleton ;	K10355|1|0.0|781|jcu:105646615|EC[not_get]		cell cell_part organelle	binding
144	CotAD_37799	locus=At_chr9:55735010:55736041:+ [translate_table: standard]	11439.7	0.754	3|2|1	9|5|5	-/-/-	CotAD_37799	MKVVAAYLLAVLGGNLSPSADDLKDILGSVGAEADDDRIELLLSEVKGKDITELTASGREKLASVPSGGGAVAAAAPTTGGGGASAAPAAEARKEEKVEEKEESDDDMGFSLFD	81.58	7e-33	gi|225440938|ref|XP_002283025.1|	PREDICTED: 60S acidic ribosomal protein P2B [Vitis vinifera]	77.42	6e-26	sp|P41099|RLA2_PARAR	60S acidic ribosomal protein P2 OS=Parthenium argentatum PE=3 SV=1	81.58	9e-32	D7TJ45	D7TJ45_VITVI Putative uncharacterized protein OS=Vitis vinifera GN=VIT_08s0007g03620 PE=4 SV=1	ECU07g0110	46.2	4e-07	COG2058	Ribosomal protein L12E/L44/L45/RPP1/RPP2	J	Translation, ribosomal structure and biogenesis ;	K02943|1|2e-33|115|vvi:100254522|EC[not_get]	cellular_process metabolic_process	cell cell_part macromolecular_complex	structural_molecule_activity
145	CotAD_18316	locus=Dt_chr9:50350153:50354554:+ [translate_table: standard]	117025	0.095	1|1|-	1|3|-	Cotton_D_gene_10000780/Cotton_D_gene_10000780;CotAD_03446/-	CotAD_18316	MGKGGENYGKREFVNSKPTDPDVFPAWAKDIHECEKHYDVSQKSGLSTAEVENRRRIYGNNELEKHEGQSIWSLIMEQFNDTLVRILLLAAVVSFVLAWYDGDEGGEMEITAFVEPLVIFLILIVNAIVGVWQENNAEKALEALKEIQSEQATVIRDGIKIPSLPAKELVPGDIVELKVGDKVPADMRVLELVSSTLRVEQGSLTGESEAVNKTNKSVSEDADIQGKRSMVFAGTTVVNGNCFCLVTQIGMETEIGKVHTQIHVASQSEEDTPLKKKLNEFGEVLTMIIGVICIFVWLINVKYFLSWEYIDGWPRNFKFSFEKCTYYFEIAVALAVAAIPEGLPAVITTCLALGTRKMAQKNALVRKLPSVETLGCTTVICSDKTGTLTTNQMAVAKLL…	85.1	0	gi|225439821|ref|XP_002277306.1|	PREDICTED: calcium-transporting ATPase 4, endoplasmic reticulum-type-like [Vitis vinifera]	80.78	0	sp|P92939|ECA1_ARATH	Calcium-transporting ATPase 1, endoplasmic reticulum-type OS=Arabidopsis thaliana GN=ECA1 PE=1 SV=2	85.1	0	F6HQX1	F6HQX1_VITVI Putative uncharacterized protein OS=Vitis vinifera GN=VIT_08s0040g02830 PE=3 SV=1	Rv1997	452	1e-142	COG0474	Cation transport ATPase	P	Inorganic ion transport and metabolism ;	K01537|1|0.0|1946|tcc:TCM_022034|EC[not_get]	-	-	-
146	CotAD_25699	locus=Dt_chr9:55592729:55597037:+ [translate_table: standard]	63648.6	0.04	-|-|2	-|-|2	-/-/CotAD_52284	CotAD_25699	MENPRTRSGSPLCSSSSLDALTTTLSSSIQALGRGFDVTSDIRLLYCKGAPGSRLVQLDEDHTDDLVLSGRVIVPNVSADIKWSMGKGDIERKPVCSFHEMSGYFNEKSGIAGRVPLGSFNAMFNFTGSSRVDAAATKSLAMVGYLIPLCTVKLAKQNLILHEDVRRAVPYTWDPAALASFIENYGTHIVTSATIGGRDVVYVRQHQSSPLSLTDIENYVKDIGDQRFLDSKGQSSAAPLKYKDKDVTVIFRRRGGDDLEQSHARWAETVQSAPDVINMTFMPIVSLLEGVPGIKHLARAIELYLEYKPPIEDLQYFLDFQIARVWAPEQSNIQRKEPVCSSLQFSLMGPKLYISPDQVTVGRKPVTGLRLSLEGNKQNRLAIHLQHLVSLPKILQPHW…	85.37	0	gi|462409811|gb|EMJ15145.1|	hypothetical protein PRUPE_ppa003545mg [Prunus persica]	76.7	0	sp|Q9C7N2|CAD1_ARATH	MACPF domain-containing protein CAD1 OS=Arabidopsis thaliana GN=CAD1 PE=2 SV=1	83.49	0	B9S8G3	B9S8G3_RICCO Putative uncharacterized protein OS=Ricinus communis GN=RCOM_1252860 PE=4 SV=1	-	-	-	-	-	-	-	K07119|1|4e-41|154|egr:104455448|EC[not_get]	-	-	-
147	CotAD_09730	locus=Dt_chr9:57521935:57523085:+ [translate_table: standard]	32683.5	0.089	-|1|-	-|1|-	-/CotAD_26979;Cotton_D_gene_10031731/-	CotAD_09730	MASLRLFLCFFLFTASSVNIVCSRSLQKDHIALFVFGDSVYDPGNNNYIDTIARANYYPYGETFFKYPTGRFSDGRLIPDFIAEYANLPLIPPYLQPGNHEVTTGVNFASAGAGALSETNQGFVIDLKTQLSYFKKVAKQLRQELGDAEAMAFLSKAVYLINIGSNDYVLPFTSNSTVFQYFSKQQYVGMVIGNLTETIKEIHMEGGRKFGFRNFGSMGCIPLLKALVPGNTGSCFEQVNELAKLHNAALTEALEEMEIKLVQFKYSMHHLNIYLSELTKNPGRFGMHPAI	63.32	1e-117	gi|224074087|ref|XP_002304246.1|	predicted protein [Populus trichocarpa]	50.34	1e-94	sp|Q9FLN0|GLIP1_ARATH	GDSL esterase/lipase 1 OS=Arabidopsis thaliana GN=GLIP1 PE=1 SV=1	63.32	2e-116	B9GXR8	B9GXR8_POPTR Predicted protein OS=Populus trichocarpa GN=POPTRDRAFT_756965 PE=4 SV=1	all3634	50.4	1e-06	COG3240	Phospholipase/lecithinase/hemolysin	IR	Lipid transport and metabolism ; General function prediction only ;	K00679|1|4e-32|129|cic:CICLE_v10027727mg|EC[not_get]!K10960|2|2e-29|120|atr:18422248|EC[not_get]!K01188|3|3e-28|117|aly:ARALYDRAFT_316517|EC[not_get]!K01206|4|4e-24|103|ath:AT1G67830|EC[not_get]			catalytic_activity
148	CotAD_43825	locus=Dt_chr12:31731420:31734025:- [translate_table: standard]	31527	0.075	1|-|1	1|-|1	Cotton_D_gene_10027797/-/Cotton_D_gene_10027797	CotAD_43825	MSVIDILTRVDVICKRYDKYDVEKQRDQNVSGGDAFARAYAAVEADIESALEKVELASKEKSKASAVAVNAEIRRTKARLLEEVPTLQRLAVKKVKGISTEEMATRNDLVLALPDRIQAIPDGTAATKQTGGWMSSASSASRTAIKFDSDERFDNEYFQESEQSSQFRQEYEMRKMKQACQTCLGAILYEDQGLDMISEGLDTLKNMAHDMNEELDRQVPLMDEIDTKVDKAAADLKNTNVRLKDTVTQLRSSRNFCIDIVLLCIVLGIAAYLYNVLKK	82.5	7e-135	gi|255557036|ref|XP_002519551.1|	syntaxin, putative [Ricinus communis]	75.63	3e-121	sp|Q9SF29|SYP71_ARATH	Syntaxin-71 OS=Arabidopsis thaliana GN=SYP71 PE=1 SV=1	82.5	9e-134	B9S0N2	B9S0N2_RICCO Syntaxin, putative OS=Ricinus communis GN=RCOM_1356980 PE=4 SV=1	-	-	-	-	-	-	-	K08506|1|4e-122|352|aly:ARALYDRAFT_897138|EC[not_get]	-	-	-
149	CotAD_13753	locus=Dt_chr12:3843834:3845420:- [translate_table: standard]	59691.9	0.21	2|3|3	4|6|14	-/-/-	CotAD_13753	MKFLQFSVLPFLIVILSVSGANLARHPHRDFLRCLSLRIANSSTITYTQNNPSYSSVLNASIHNTRFSTPTTPKPYAIITPRKTSHVQSTIYRSKHHAFQLRIRSGGHDDEGVSYLSQVPFVILDLVNFRDVKVDTKNEVAWVQSGATTGELYYGIASKTQTLGFPAGICHTIGIGGHLSGGGFGILGRKYGLAADHIIDAKLVDANGRVLRRKSMGEDLFWAIRGGGGNTFGVVLAWKIKLVPVPPVVTVFTVNKNLEQNATKIFHRWQYIAHKLPRDLFTTVWVMKVNSSQVGRKTVQASFKGMFLGRIDVLIPLIQYAFPELGLARENCTEMSWVQSVLYFGALPIEPVEILLNRSALPRLSLKAKTDYIRQPMSETGIEGFMNMFLEEGTDFAIT…	55.7	0	gi|224108834|ref|XP_002333339.1|	predicted protein [Populus trichocarpa]	46.58	2e-158	sp|A6P6V9|CBDAS_CANSA	-	55.7	0	B9NDK4	B9NDK4_POPTR Predicted protein OS=Populus trichocarpa GN=POPTRDRAFT_789090 PE=4 SV=1	SSO2162_1	50.4	6e-06	COG0277	FAD/FMN-containing dehydrogenases	C	Energy production and conversion ;	-	-	-	-
150	CotAD_49097	locus=scaffold1650.1:9432:13958:+ [translate_table: standard]	85098.1	0.008	1|-|-	1|-|-	-/-/-	CotAD_49097	MNSSDSLQSTPLKSKKSLNLTSNSPVSKTPAKRASQLPSRARNRSSALSIKEVRQAAQIQPQTQTNQIKSARKQILSWTAESPPPKTSRDSSDKLPEKYEILCGFFDSLDSAIRLLKLKGSMPTFTNICPKVECLTDRRFSYGHLAQLKHILPEAIEIKRLLIFDERISCMKPDLHVCIIASAIDCGDNSKSETKNPNMRRVFRARLMDYLEAHPEVDEIPEDDLPEPFNRSKQNSQWSSSTEIVTEQQSLTSQGEVLKEEAQPQPSKHTNSNSKLDVETLPDAVNDQLPVVASHVSRSFRKSFSRKATSKAQEVVEKCSKVSLQSSQVAEKCACKSVKGIETNSAPIQSPTKFLSKPTICEPSYKLCLPATPVKEINSLETEDKSPTKSGCLQSTPAK…	53.16	5e-153	gi|255583212|ref|XP_002532371.1|	conserved hypothetical protein [Ricinus communis]	52.15	7e-51	sp|Q9SJW9|CDT1A_ARATH	CDT1-like protein a, chloroplastic OS=Arabidopsis thaliana GN=CDT1A PE=1 SV=1	53.16	7e-152	B9T2A2	B9T2A2_RICCO Putative uncharacterized protein OS=Ricinus communis GN=RCOM_0463570 PE=4 SV=1	-	-	-	-	-	-	-	K10727|1|0.0|763|tcc:TCM_004085|EC[not_get]	-	-	-
151	Cotton_D_gene_10023896	locus=scaffold97:116235:117562:+ [translate_table: standard]	17169.8	0.178	-|1|-	-|6|-	-/CotAD_51884;CotAD_59095/-	Cotton_D_gene_10023896	VQDARGNDVDLSIYKGKVLLIVNVASQCGLTNSNYTELSKLYEQYKDQGFEILAFPCNQFGGQEPGNNEQILEFACTRFKAEYPIFDKVDVNGEKAAPIYKFLKSSKGGLFGDSIKWNFSKFLVDKEGHVVDRYAPTTSPLSIEKDIKKLLA	90.13	6e-101	gi|125620186|gb|ABN46985.1|	glutathione peroxidase [Nelumbo nucifera]	86.18	3e-97	sp|O48646|GPX6_ARATH	Probable phospholipid hydroperoxide glutathione peroxidase 6, mitochondrial OS=Arabidopsis thaliana GN=GPX6 PE=2 SV=2	90.13	8e-100	A3FPF8	A3FPF8_NELNU Glutathione peroxidase OS=Nelumbo nucifera GN=GP PE=2 SV=1	PA2826	140	1e-42	COG0386	Glutathione peroxidase	O	Posttranslational modification, protein turnover, chaperones ;	K00432|1|5e-106|305|tcc:TCM_016241|EC[not_get]	metabolic_process response_to_stimulus		antioxidant_activity catalytic_activity
152	Cotton_D_gene_10033694	locus=scaffold4:878762:883056:- [translate_table: standard]	78497.8	0.023	-|-|1	-|-|1	-/-/-	Cotton_D_gene_10033694	MEAGHKIGSSAHPTSLHPPVRGDASSGTLGRHLARRLVEIGVKDVFSVPGDFNLTLLDHLIAEPELNLVGCCNELNAGYAADGYARAKGVGACVVTFTVGGLSVLNAIAGAYSENLPVICIVGGPNSNDYGTNRILHHTIGLPDFSQELRCFQTITCAQAVVNNLDDAHELLDTAISTALKESKPVYISIGCNLPGIPHPTFARDPVPFFLAPKVSNQLGLEAAVEATANFLNKAVKPVLVGGPKLRVANAKDAFVELADACGYPIAVMPSGKGLVPEHHPHFIGTYWGAVSTSFCGEIVESADAYVFAGPIFNDYSSVGYSLLIKKDKAIIVQPNRVTIGNGPSFGWVFMADFLSALARKLKKNTTAVENYQRIFVPPGMPLKHGNDEPLRVNVLFKH…	88.62	0	gi|70609688|gb|AAZ05069.1|	pyruvate decarboxylase [Citrus sinensis]	87.33	0	sp|P51850|PDC1_PEA	Pyruvate decarboxylase isozyme 1 OS=Pisum sativum GN=PDC1 PE=2 SV=1	88.62	0	Q1I1D9	Q1I1D9_CITSI Pyruvate decarboxylase OS=Citrus sinensis PE=2 SV=1	MTH1444	108	5e-24	COG0028	Thiamine pyrophosphate-requiring enzymes [acetolactate synthase, pyruvate dehydrogenase (cytochrome), glyoxylate carboligase, phosphonopyruvate decarboxylase]	EH	Amino acid transport and metabolism ; Coenzyme transport and metabolism ;	K01568|1|0.0|1131|tcc:TCM_029740|EC[not_get]			binding catalytic_activity
153	Cotton_D_gene_10012485	locus=scaffold206:120968:125724:+ [translate_table: standard]	38356.9	0.021	1|-|-	1|-|-	-/-/-	Cotton_D_gene_10012485	MGILSKALTRLRPTGALYSLPNQSLPPPKHWVPSSSFSTAAAVASSQSLHDKEKRSKWSRWFLFLPGAITFGLGTWQIFRRLDKIEMLDHRQKRLQMEPLKLNDMPPSSETLDTLEFRRVVCKGVFYYERSIYIGPRSRSISGVTENGYYVITPLMPIPGDADSVQSPVLVNRGWVPRSWRDKSFEVSQDGEKSSSTDVVPVQQNERSWWGLFRSKKQKAVEAQAPAITYVEVIGVVRGSEKPSVFVPPNDPNSGQWFYVDVPAIAVACGLPKDTLLIEDINENVNPSNPYPVPKDINALIRSSVMPQDHLNYTLTWYSLSAAVTFMAFKRLKPKNSRR	72.41	7e-153	gi|462405041|gb|EMJ10505.1|	hypothetical protein PRUPE_ppa007867mg [Prunus persica]	62.2	1e-127	sp|Q9SE51|SURF1_ARATH	Surfeit locus protein 1 OS=Arabidopsis thaliana GN=SURF1 PE=2 SV=1	69.9	8e-149	B9SXS0	B9SXS0_RICCO Surfeit locus protein, putative OS=Ricinus communis GN=RCOM_0569510 PE=4 SV=1	mlr7500	55.5	3e-08	COG3346	Uncharacterized conserved protein	S	Function unknown ;	K14998|1|0.0|531|tcc:TCM_012907|EC[not_get]	-	-	-
154	Cotton_D_gene_10035528	locus=scaffold5:376816:382845:- [translate_table: standard]	173347	0.008	1|-|-	1|-|-	-/-/-	Cotton_D_gene_10035528	MDRTREARRVSMASAAATNGLSRRRHRTSSLRDSPEEDGPVETHETARLRDRKKDRDRERERYRERERDRLSRTSKRRRGDRLMSNRGDGGDGTSEESVNDDEDDDDEDSGGTGGVGSVRTVSPNIIAGSLSMSNHHHNHHHHQLQQHQQHQHRKSFTPPVKVIRTTPSAGMTASMTTSTSTWKPADEMIGVSVPRKARSATKRSHEWASSGGGGVGVLGGEQIHCQASTSPVRTGVTGALTSPSPAPASPSSSSASMRKKMKPNANGTKQRPPKSSSKSSSSAQEEIEIEIAEVLYGMMRQPQVPSKQEIIGNDSAKFDSREVNKPNNDSKSVVSSPISNSPSTLPQSSSILPSNSSSSATPMSAIAPKRKRPRPVKYEDENTTTTTPPPPSIFPPRH…	57.03	0	gi|224099783|ref|XP_002311616.1|	predicted protein [Populus trichocarpa]	43.35	6e-108	sp|Q94KE2|TIC_ARATH	Protein TIME FOR COFFEE OS=Arabidopsis thaliana GN=TIC PE=1 SV=2	57.03	0	B9HJW4	B9HJW4_POPTR Predicted protein OS=Populus trichocarpa GN=POPTRDRAFT_564823 PE=4 SV=1	-	-	-	-	-	-	-	-	-	-	-
155	CotAD_08415	locus=scaffold190.1:1417769:1432906:- [translate_table: standard]	348988	0.003	1|-|-	1|-|-	-/-/-	CotAD_08415	MLRDFKFLRRNTSKNEEVENVPVNPRDSLASQQSNDGSSRPPLNTIQDPTTKPKLEQEGSVRSRIDRTPTKPKPKLPDSTLPLKTPDKHGFLSKTRYGWAKNEAAESDSRNAGTTNMTPRVSRGIGKATSSCYSESNSTQSTPTKSVSKPPVSGFRNKFDGNGGMRGGNFAALYRGVPSSSGGPVTVVNTVEVPHFDLKEDPSFWMDHNVQVLIRVRPLNGVEKSTNGYNRCLKQENSQTIAWIGQPETRFTFDHVACETVDQEMLFRMAGLPMVENCLSGYNSCMFAYGQTGSGKTYTMLGEIEDLEVKPSPQRGMTPRIFEFLFARIQAEEEIRRDEKLKYNCKCSFLEIYNEQITDLLDPSATNLLLREDVKKGVYVENLTEFEVQTVSDILKLLS…	68.6	0	gi|255561647|ref|XP_002521833.1|	ATP binding protein, putative [Ricinus communis]	45.19	1e-124	sp|Q9GYZ0|KIF15_STRPU	Kinesin-like protein KIF15 OS=Strongylocentrotus purpuratus GN=KIF15 PE=1 SV=1	68.6	0	B9S764	B9S764_RICCO ATP binding protein, putative OS=Ricinus communis GN=RCOM_0773970 PE=3 SV=1	YKL079w	110	2e-23	COG5059	Kinesin-like protein	Z	Cytoskeleton ;	K10400|1|0.0|2291|tcc:TCM_006991|EC[not_get]	-	-	-
156	CotAD_50414	locus=Dt_chr1:80546772:80548459:- [translate_table: standard]	47014.5	0.034	1|-|-	1|-|-	Cotton_D_gene_10001128;CotAD_41630;CotAD_29483;CotAD_54921;CotAD_32183;CotAD_69252;Cotton_D_gene_10033892;CotAD_44932;CotAD_30185;Cotton_D_gene_10022060;CotAD_50413;Cotton_D_gene_10000903;CotAD_52783;Cotton_D_gene_10023001/-/-	CotAD_50414	MKDRTTGRARGFGFIVFSDPAVAEKVIKEKHNIDGRMVEAKKAVPRDDQNIMSRSTSSIHSSPGPARTRKIFVGGLASTVTESDFKKYFDQFGNITDVVVMYDHNTQRPRGFGFITYDSEEAVDKVLLKNFHELNGKMVEVKRAVPKDLSPGPARSPLGVYNYGLNRSNSFLNGYTQGYTPSNLGGYGLRMDGRFSPVAAGRTGFPPFGSGYGMGMNFEPGLNPGFGNSTNFNNYGRGLSPYYIGNTNRFGSPIGYDGSNGGGSNTSFFSSVTRNLWGNGGLNYNANAASSSAYAGSGSGSIGTSAFGNSGINWSSSQISSQGGRNNVSGNNVNFSYGSGDNSFGLGTAGHERNTGTNVVPTSSYAASNGSYDGAFADFYGGASFYRDTTWPSSTSERD…	75	0	gi|225447606|ref|XP_002272993.1|	PREDICTED: uncharacterized protein LOC100246008 [Vitis vinifera]	53.55	1e-49	sp|Q8W034|RNP1_ARATH	-	75	0	F6HHL2	F6HHL2_VITVI Putative uncharacterized protein OS=Vitis vinifera GN=VIT_12s0057g00480 PE=4 SV=1	ECU03g0730	48.9	8e-06	COG0724	RNA-binding proteins (RRM domain)	R	General function prediction only ;	K14411|1|0.0|526|vvi:100246008|EC[not_get]	-	-	-
157	CotAD_67539	locus=scaffold4267.1:685:5919:+ [translate_table: standard]	70104.5	0.035	-|1|-	-|1|-	-/-/-	CotAD_67539	MIEEVVNVVVEGGAIPALVKHLQAPLSDEGDLSLKPFEHEVEKGSAFALGLLAVKPEHQQLIVDSGALSHLVNLLRRYKDSSTSRAVISVIRRAADAITNLAHENSSIKTRVRMEGGIPPLVELLEFTDTKVQRAAAGALRTLAFKNDENKNQIVECNALPTLISMLRSDDAAIHYEAVGVIGNLVHSSPNIKREVLAAGALQPVIGLLTSCCSESQREAALLLGQFAATDSDCKVHIVQRGAVRPLIEMLHSPDIQLKEMSAFALGRLAQDMHNQAGIAHMGGLVPLLKLLDSKNGSLQHNAAFALYGLADNEDNVSDFIRVGGVQRLQDGEFIVQATKDCVAKTLKRLEEKIHGRVLNHLLYLMRVAEKPVQRRVAFALAHLCSPDDQRTIFIDNNG…	90.53	0	gi|255552325|ref|XP_002517207.1|	protein binding protein, putative [Ricinus communis]	83.25	0	sp|B9DHT4|ARIA_ARATH	ARM REPEAT PROTEIN INTERACTING WITH ABF2 OS=Arabidopsis thaliana GN=ARIA PE=1 SV=2	90.53	0	B9RTY8	B9RTY8_RICCO Protein binding protein, putative OS=Ricinus communis GN=RCOM_0913950 PE=4 SV=1	YNL189w	50.8	6e-06	COG5064	Karyopherin (importin) alpha	U	Intracellular trafficking, secretion, and vesicular transport ;	K10523|1|1e-73|236|mdm:103408089|EC[not_get]!K08332|2|6e-26|115|vcn:VOLCADRAFT_41528|EC[not_get]	-	-	-
158	Cotton_D_gene_10019501	locus=scaffold132:460681:462125:+ [translate_table: standard]	34316.1	0.134	4|-|-	10|-|-	CotAD_17919/-/-	Cotton_D_gene_10019501	MGLASATTISSSSSSSLLSASLCPARRGFLPPCHHHFFFLSTFSKCNLNWKRSSGKKRGERVRCSAVGVGVGVEDEACELVNGVELSIGEGDDNIQAYLFKAVKNNNGAGVLLLSDIFGFQDSATRDFAYQVACHGYNVLVPDLFRGDPWEKGRPKPMFEQWLASQDPQRVANDIATSTKWMVDEFRAAGISKKLGIIGFCFGGGRVIDVLAADQGACFSTAVSFYGTRMDLAAASKIKVPVLFISGDDDLLCPIGVLSKFEKIIGNGSRVVIFEGRGHAFAHRPGSTEEDADAEQAFTLMRNWLHDGLLVNS	68.25	7e-136	gi|462421481|gb|EMJ25744.1|	hypothetical protein PRUPE_ppa024601mg [Prunus persica]	29.73	1e-24	sp|Q96DG6|CMBL_HUMAN	Carboxymethylenebutenolidase homolog OS=Homo sapiens GN=CMBL PE=1 SV=1	70.11	5e-129	D7U9D0	D7U9D0_VITVI Putative uncharacterized protein OS=Vitis vinifera GN=VIT_18s0041g00350 PE=4 SV=1	mll1495	49.3	3e-06	COG0412	Dienelactone hydrolase and related enzymes	Q	Secondary metabolites biosynthesis, transport and catabolism ;	K01061|1|8e-156|441|tcc:TCM_036508|EC[not_get]			catalytic_activity
159	Cotton_D_gene_10025203	locus=scaffold39:1540511:1540840:+ [translate_table: standard]	10959.5	0.312	2|2|2	3|7|7	-/-/-	Cotton_D_gene_10025203	MPRGSSQSQSQSSTSSSTSRPGVMAPRGSAAAAAGMRRRRIVGGSSSATASGSVGSGSGGNMLRFYTDDAPGLKISPTVVLVMSLCFIGFVTALHVFGKLYRAKAGAGP	97.92	5e-26	gi|357453827|ref|XP_003597194.1|	Protein transport protein Sec61 beta subunit [Medicago truncatula]	74.42	2e-15	sp|P38389|SC61B_ARATH	Protein transport protein Sec61 subunit beta OS=Arabidopsis thaliana GN=At2g45070 PE=2 SV=1	97.92	7e-25	Q2HSW3	Q2HSW3_MEDTR Protein transport protein Sec61 beta subunit OS=Medicago truncatula GN=MTR_2g093770 PE=4 SV=1	-	-	-	-	-	-	-	K09481|1|2e-27|101|tcc:TCM_041057|EC[not_get]	-	-	-
160	Cotton_D_gene_10010170	locus=scaffold130:455579:460332:+ [translate_table: standard]	78830.4	0.037	-|1|1	-|1|1	-/CotAD_53791;CotAD_22934/CotAD_53791;CotAD_22934;Cotton_D_gene_10037446;CotAD_63416;CotAD_00490	Cotton_D_gene_10010170	MASRVKEDERNERIIRVLLFANLSVEQGPQYVCTNFWTFVCTTCSGIHREFTHRVKSVSMAKFTSQEVTALQEGGNQRAREIYMKEWDPQRNSGPDSSNVERLRDFIKHVYEDRRYSGERNYDKPPRGKMGDKEDVYGSRRADGYRGGSRSPPYEDTYDRRYGDRSSPGGRNDDRNSRYGYDEKRSPGYDQESRQYGDYRRSPARPEVINDWRREDRFGNGRKPDDNRVSDGDPKLEGRSPERPKESSSPPVVRPVREILGENVIPLRVSEPPKANSDRTVDGPQTQRTASSSSLGHSSGNPVEAKLETTGSLIDFDADPEPPVAPMVTQTQQTTATQSIVQPTSSTNENWASFDVSPQTNVSQTSSNVNTLDSVLSQLSVPVSVPGHLSGVPSGVGGQ…	57.66	0	gi|359484370|ref|XP_002281316.2|	PREDICTED: uncharacterized protein LOC100249171 [Vitis vinifera]	46.34	4e-52	sp|Q8RXE7|AGD14_ARATH	Probable ADP-ribosylation factor GTPase-activating protein AGD14 OS=Arabidopsis thaliana GN=AGD14 PE=1 SV=2	57.66	0	D7TBR5	D7TBR5_VITVI Putative uncharacterized protein OS=Vitis vinifera GN=VIT_11s0016g04210 PE=4 SV=1	SPAC824.09c	57	4e-08	COG5347	GTPase-activating protein that regulates ARFs (ADP-ribosylation factors), involved in ARF-mediated vesicular transport	U	Intracellular trafficking, secretion, and vesicular transport ;	K12486|1|1e-10|68.2|jcu:105632810|EC[not_get]	-	-	-
161	CotAD_72042	locus=Dt_chr11:58521120:58525174:- [translate_table: standard]	48413	0.021	1|-|-	1|-|-	Cotton_D_gene_10006276;CotAD_56638;CotAD_21179/-/-	CotAD_72042	MELLALHISPTLARECFLTASNNNSCVFPRYVRNRHGKSRFRFQARKGGSRSWNPNKISRLDLIQQVLERNNLIEDSQEEDEDEISGDDSSFLSLSEKPDRNMALLDEYELEELDFTSPTNHRSGYVAVLGKPNVGKSTLANQMIGQKLSIVTDKPQTTRHRVLGICSGPEYQMILYDTPGVIEKKMHKLDSMMMKNVRSAALNADCVLVIVDACKVPENINEVLEEGVGDFKCTLPTLLVLNKKDLIKPGEIAKKLEWYEKFTDVDEVIPVSAKYGHGVDDIKDWILSKLPTGPPYYPKDIVSEHPERFFVAEIVREKIFMQYRNEVPYACQVNVVSYKTRPNAKEFIQVEIVVEKDSQKIILIGKGGKALKTLATAARLDIEDFLQKKVFLEVEVKV…	75.06	0	gi|225430700|ref|XP_002264259.1|	PREDICTED: GTPase Era-like [Vitis vinifera]	43.73	1e-61	sp|Q39T84|ERA_GEOMG	GTPase Era OS=Geobacter metallireducens (strain GS-15 / ATCC 53774 / DSM 7210) GN=era PE=3 SV=1	72.71	0	Q0ZR46	Q0ZR46_THEHA Putative uncharacterized protein OS=Thellungiella halophila PE=3 SV=1	CC1562	191	9e-57	COG1159	GTPase	R	General function prediction only ;	K03595|1|0.0|649|tcc:TCM_000341|EC[not_get]	cellular_component_organization_or_biogenesis cellular_process metabolic_process single-organism_process	cell cell_part membrane organelle	binding catalytic_activity
162	CotAD_29884	locus=At_chr4:89260132:89266964:+ [translate_table: standard]	101413	0.043	-|-|1	-|-|1	-/-/-	CotAD_29884	MIPLLSLRSPASPSSALFHFSPSPPFSSRFTKSPFRRFLPPTKPSLSTNSFSSTSQQLGPQGPQNQEAPRTLFPGGYKRPEIKVPNFVLQLDPDDVLADDNALDFIDKAVSKWVGLVVLNGGEGSGGRVYEAARSLKAVVKDRAYLLIAERVDIAAAVGASGVVLSDQGLPAIVARNTMMDSKSDSVFLPLVARTVQSSDSALNASSSEGADFLIYDLGQEEHVNMAMKAVYENVKIPIFVVNNNSQAEMPSYTELTKIFTSGASGVVLSLEDLRLITDDVLSQFFNIVYTTNNKRQDESIDELEMAEINRGSHQKVGVAGFIKVEDREKQLIEKERSVLTEAINVFQKAAPLMEEISLLIDAVAQIDEPFLLAIVGEFNSGKSTVINALLGERYLTEG…	69.57	0	gi|462396615|gb|EMJ02414.1|	hypothetical protein PRUPE_ppa001060mg [Prunus persica]	33.33	2e-23	sp|P40983|YOR6_CALSR	Uncharacterized protein in xynA 3'region (Fragment) OS=Caldicellulosiruptor sp. (strain Rt8B.4) PE=4 SV=1	68.71	0	D7TPB4	D7TPB4_VITVI Putative uncharacterized protein OS=Vitis vinifera GN=VIT_07s0104g00480 PE=4 SV=1	sll0503	50.8	9e-06	COG1100	GTPase SAR1 and related small G proteins	R	General function prediction only ;	-	metabolic_process		catalytic_activity
163	Cotton_D_gene_10019530	locus=scaffold132:1611807:1617972:+ [translate_table: standard]	37640.7	0.201	5|2|3	8|3|5	CotAD_73989/CotAD_73989/CotAD_73989	Cotton_D_gene_10019530	MLLQTTISSRPLYQRHACFSATHQLPLYYSFLASASLNFTRKNLFFQAIVRCYREPALKNTGAGNGVNDTKFLNLQMFQKGMAAKSFTSSRFDESLKNHRAMVDDLNVKKPLSVVSAFAFGQALWLISAQLANASEITTGDAVYEVGELFELGIQLSYLLLLLVLLGVGTFFVIRQVLVRRELDLSAKELQEQVRSGDASATELFELGAVMLRRKFYPAANKFLLQAIEKWDGDDQDLAQVYNALGVSYVRDGKLEKGINQFETAVKIQPGYVTAWNNLGDAYEKKKDYKSALKAFEEVLLFDPNNKIARPRRDALKDRVEMYKGVPIKSKDR	67.07	7e-140	gi|449465368|ref|XP_004150400.1|	PREDICTED: uncharacterized protein LOC101215394 [Cucumis sativus]	30	2e-18	sp|O78458|YCF37_GUITH	Uncharacterized protein ycf37 OS=Guillardia theta GN=ycf37 PE=3 SV=1	67.17	1e-134	D7SRA6	D7SRA6_VITVI Putative uncharacterized protein OS=Vitis vinifera GN=VIT_18s0072g00860 PE=4 SV=1	mll2208	51.2	1e-06	COG0457	FOG: TPR repeat	R	General function prediction only ;	K02717|1|2e-45|165|dosa:Os10t0461100-01|EC[not_get]!K09553|4|7e-07|54.3|gmx:547932|EC[not_get]	-	-	-
164	CotAD_33936	locus=scaffold1588.1:381659:382440:- [translate_table: standard]	27583.9	0.113	-|1|-	-|1|-	-/-/-	CotAD_33936	MEFNMSYHKANVRSNRDMSNAVMHVAELHAEPEYAYIIETSLGKTENKNPILHTTDDINLEFTGGVAKKKHLWKTVSHPSNGAAGEQTFAYDSTQRRYQGKDSCSNESFITISEINLRTQPSHVPPPARPPPHVRVNTGDHQSVQHAVSGERMDASSAAVASAAAMKEAMDKAQAQLKSAKELLERKREGIENSNKLGSKSDGKGKKERTSKAIEGSSDIKDDKVQGIKGKEDFMERKYLLERRGKRL	44.35	1e-25	gi|224134248|ref|XP_002327792.1|	predicted protein [Populus trichocarpa]	-	-	-	-	44.35	2e-24	B9MXM4	B9MXM4_POPTR Predicted protein OS=Populus trichocarpa GN=POPTRDRAFT_593914 PE=4 SV=1	-	-	-	-	-	-	-	-	-	-	-
165	Cotton_D_gene_10007011	locus=scaffold246:355376:357012:+ [translate_table: standard]	23363.6	0.146	1|1|1	1|3|2	-/-/-	Cotton_D_gene_10007011	MASEAAVEVNAISAAAPEAEATTGAEKQPHKLERKWTFWFDNQSRPKQGAAWGTSLRKVYTFDTVEEFWCLYDQIFKPSKLPGNADFHLFKAGIEPKWEDPECASGGKWSVTSNRKANLENMWLETLMALIGEQFDEADEICGVVASVRQRQDKLALWTKTATNEAAQMGIGRKWKEIIGVNDKITYSFHDDSRRERSAKGRYNV	89.39	8e-122	gi|225433243|ref|XP_002285444.1|	PREDICTED: eukaryotic translation initiation factor 4E-2-like [Vitis vinifera]	76.11	5e-104	sp|Q03389|IF4E2_WHEAT	Eukaryotic translation initiation factor 4E-2 OS=Triticum aestivum PE=1 SV=1	89.39	1e-120	F6H8U4	F6H8U4_VITVI Putative uncharacterized protein OS=Vitis vinifera GN=VIT_05s0049g01770 PE=3 SV=1	ECU08g0900	63.9	2e-12	COG5053	Translation initiation factor 4E (eIF-4E)	J	Translation, ribosomal structure and biogenesis ;	K03259|1|7e-127|358|tcc:TCM_020973|EC[not_get]	cellular_process metabolic_process	cell cell_part	binding
166	Cotton_D_gene_10012408	locus=scaffold100:575782:580306:- [translate_table: standard]	52681	0.067	1|3|2	2|4|4	CotAD_39361/-/CotAD_39361	Cotton_D_gene_10012408	MGPRSPPKRVSISHSFTSFFLGFLIPCINAAPLGPESDRVIKLPSQPATPSISQFSGYVTVNEEHGRALFYWFFEAQSEASKKPLLLWLNGGPGCSSIAYGAASELGPLRVGENGVDLHFNEFAWNQESPVGVGFSYTNTTSDLTKLDDAFVAEDVYMFLVEWLQRFPHFKTRDFFISGESYAGHYVPQLAELVYDRNNDTTRYPFINLQGFMVGNPVTDDNYDYTGIMDYAWSHSVISDEFYHKIKQACDFKELNWSTECNALVNQVFDTYSEIDIYNIYDPKCLINTTSSATANKIKFDGLNRVRILAEGYDPCYSPYSEMYFNRPDVQTSIHADSRGEKWVSCKDSILNSYNFSVFSVLPVYEKLIKGKLKIWMYSGDMDGRVPIISSRYCVEALG…	70.91	0	gi|224112026|ref|XP_002316057.1|	predicted protein [Populus trichocarpa]	63.66	0	sp|Q9LSM9|SCP33_ARATH	Serine carboxypeptidase-like 33 OS=Arabidopsis thaliana GN=SCPL33 PE=2 SV=2	70.91	0	B9HX57	B9HX57_POPTR Predicted protein OS=Populus trichocarpa GN=POPTRDRAFT_1091180 PE=4 SV=1	SPAC1296.03c	80.1	2e-15	COG2939	Carboxypeptidase C (cathepsin A)	E	Amino acid transport and metabolism ;	K16297|1|0.0|724|tcc:TCM_021426|EC[not_get]	-	-	-
167	CotAD_05542	locus=Dt_chr7:5742941:5744602:+ [translate_table: standard]	26100.1	0.094	1|2|2	4|5|6	Cotton_D_gene_10002789;CotAD_34749/Cotton_D_gene_10002789;CotAD_34749/Cotton_D_gene_10002789;CotAD_34749	CotAD_05542	MSTLDATRAELALVVLYLNKAEARDKICRAIQYGSKFLSDGQPGTAQNVDKSTSLARKVFRLFKFVNDLHGLISPVPQGTPVPLVLLGKSKNALLSTFLFLDQIVWLGRTGIYKNKERAELIGRISLFCWMGSSICTTLVELGELGRLSASMKKLEKRLKDSDKYKNEEYRAKLQNSNERTLALVKAGMDIVVAVGLLQLAPKKVTPRVTGAFGFVSSLISCYQLLPSPPKSKTP	91.88	1e-157	gi|224130140|ref|XP_002320762.1|	predicted protein [Populus trichocarpa]	86.27	5e-152	sp|Q9LQ73|PX11C_ARATH	Peroxisomal membrane protein 11C OS=Arabidopsis thaliana GN=PEX11C PE=1 SV=1	91.88	2e-156	B9IC69	B9IC69_POPTR Predicted protein OS=Populus trichocarpa GN=POPTRDRAFT_730989 PE=4 SV=1	-	-	-	-	-	-	-	K13352|1|2e-146|410|eus:EUTSA_v10006216mg|EC[not_get]	cellular_component_organization_or_biogenesis cellular_process	cell cell_part organelle organelle_part
168	CotAD_60088	locus=Dt_chr8:35406921:35409481:- [translate_table: standard]	46322.6	0.073	-|3|-	-|7|-	-/-/-	CotAD_60088	MIMKLVLLWVLGLWSVSGIDLSRSESFLSYLDEEVTMSPGSTTTLIVPLTLIQGAASKGAVCLDGTLPGYHLHRGFGSGANSWVIHLEGGGWCNTIRSCVFRKTTRRGSSKFMEKSINFTGILSNKAEENPDFYNWNRVRVRYCDGASFAGEGQNEANKLYFRGQRIWLAAMEELMAKGMQNANQAILSGCSAGGLASILHCDEFKNLFPETTKVKCLSDAGLFLDATNVAGGHTLRDMYEGVVTLQGVQKNLPSTCTSQKDPTSCFFPQNLVSNVKTPMFLLNAAYDAWQVDQSLIPSLADPHGLWRACKTDRSHCNSSQIQFFQDFRNQMLDAVKIFSESNQNGLFINSCFAHCQSERKDTWYENDSPRIGNKGIAVSVGDWFFDRTAVKAIDCPYS…	73.3	0	gi|462418309|gb|EMJ22758.1|	hypothetical protein PRUPE_ppa006038mg [Prunus persica]	30.31	7e-23	sp|Q8R116|NOTUM_MOUSE	Protein notum homolog OS=Mus musculus GN=Notum PE=2 SV=2	71.07	0	B9I994	B9I994_POPTR Predicted protein OS=Populus trichocarpa GN=POPTRDRAFT_572510 PE=4 SV=1	-	-	-	-	-	-	-	K00654|1|2e-23|105|pda:103698677|EC[not_get]	-	-	-
169	CotAD_54842	locus=At_chr9:31645306:31648484:+ [translate_table: standard]	26905.5	0.073	2|2|1	4|3|4	Cotton_D_gene_10027601;CotAD_59776;CotAD_50951;Cotton_D_gene_10009518/Cotton_D_gene_10027601;CotAD_59776;CotAD_50951;Cotton_D_gene_10009518/Cotton_D_gene_10027601;CotAD_59776;CotAD_50951;Cotton_D_gene_10009518	CotAD_54842	MATRLQFENSCEVGVFSKLTNAYCLVAIGGSENFYSAFESELADVIPVIKTSLGGTRIIGRLCAGNKNGLLVPHTTTDQELQHLRNSLPDQVVVQRIEERLSALGNCIACNDHVALTHTDLDRETEEIIADVLGVEVFRQTIAGNILVGSYCAFSNRGGLVHPHTSIEDLDELSTLLQVPLVAGTINRGSEVIAAGMTVNDWTAFCGSDTTATELSVIESVFKLREAQPTAIVDEMRKSLIDTYV	94.29	1e-175	gi|462395757|gb|EMJ01556.1|	hypothetical protein PRUPE_ppa010538mg [Prunus persica]	92.24	2e-173	sp|Q9M060|IF62_ARATH	Eukaryotic translation initiation factor 6-2 OS=Arabidopsis thaliana GN=EIF6-2 PE=2 SV=1	95.1	2e-174	I1L3P5	I1L3P5_SOYBN Uncharacterized protein OS=Glycine max GN=Gma.31632 PE=4 SV=1	VNG2466a	95.9	1e-23	COG1976	Translation initiation factor 6 (eIF-6)	J	Translation, ribosomal structure and biogenesis ;	K03264|1|3e-177|489|pvu:PHAVU_007G114800g|EC[not_get]	cellular_component_organization_or_biogenesis cellular_process metabolic_process		binding
170	Cotton_D_gene_10036391	locus=scaffold47:4786724:4787447:- [translate_table: standard]	14156.6	0.159	2|2|-	4|6|-	CotAD_29343/CotAD_29343/-	Cotton_D_gene_10036391	MAHSLTPVPATSITPIAKSTKLASHIPTLRLQTVSASYQTPHHVLDDKLVHRRTVTLSLAGAMLSLNVGDQRQANAARRPPPPPPEEKKDPSVSGVQAKVLASKKRKEAMKQAMAKMREKGKPVDGTSPPSE	56.06	5e-32	gi|224121936|ref|XP_002330690.1|	predicted protein [Populus trichocarpa]	-	-	-	-	56.06	7e-31	B9N5W9	B9N5W9_POPTR Predicted protein OS=Populus trichocarpa GN=POPTRDRAFT_828173 PE=4 SV=1	-	-	-	-	-	-	-	-	-	-	-
171	CotAD_00285	locus=Dt_chr9:65966012:65967618:+ [translate_table: standard]	19587.1	0.084	-|-|1	-|-|1	-/-/Cotton_D_gene_10037254;CotAD_39709	CotAD_00285	MEEEKASSKFKRVCVFCGSNSGRRKVFSDAALELGNELVKRKIDLVYGGGSVGLMGLISQTVIIPKALMPFEISGETVGEVRTVLDMHERKAEMAREADAFIALPGGYGTMEELLEMITWSHLGIHKKTVGLLNVDGYYNNLLALFDNGVEEGFIKPGARHIIVSAPTANELLEKMEV	83.87	4e-109	gi|462420860|gb|EMJ25123.1|	hypothetical protein PRUPE_ppa011032mg [Prunus persica]	80.43	2e-104	sp|Q84MC2|LOG8_ARATH	Cytokinin riboside 5'-monophosphate phosphoribohydrolase LOG8 OS=Arabidopsis thaliana GN=LOG8 PE=1 SV=1	83.78	1e-106	A5C3Z8	A5C3Z8_VITVI Putative uncharacterized protein OS=Vitis vinifera GN=VIT_04s0008g01040 PE=4 SV=1	DR0471	48.5	1e-06	COG1611	Predicted Rossmann fold nucleotide-binding protein	R	General function prediction only ;	K06966|1|1e-111|319|tcc:TCM_037315|EC[not_get]	-	-	-
172	CotAD_53423	locus=scaffold2407.1:202541:204514:- [translate_table: standard]	24304.5	0.338	2|2|1	2|2|1	Cotton_D_gene_10003314;CotAD_16856/Cotton_D_gene_10003314;CotAD_16856/-	CotAD_53423	MAAYRADDDYDYLFKLVLIGDSGVGKSNLLSRFTKNEFNLESKSTIGVEFATRSIRVDDKVVKAQIWDTAGQERYRAITSAYYRGAVGALLVYDVTRHITFENVERWLKELRDHTDSNIVIMLVGNKADLRHLRAVSTEEAKAFAEREKTYFMETSALESLNVENAFTEVLTRIYHVVSRKALEVGDDPAALPKGQTINVGKDDVSALKKIGCCSA	93.63	1e-141	gi|224121856|ref|XP_002330670.1|	predicted protein [Populus trichocarpa]	92.16	2e-140	sp|Q40521|RB11B_TOBAC	Ras-related protein Rab11B OS=Nicotiana tabacum GN=RAB11B PE=2 SV=1	93.63	2e-140	B9N618	B9N618_POPTR Predicted protein OS=Populus trichocarpa GN=POPTRDRAFT_672332 PE=3 SV=1	YDL192w	47	4e-06	COG1100	GTPase SAR1 and related small G proteins	R	General function prediction only ;	K07904|1|1e-142|399|jcu:105639555|EC[not_get]	biological_regulation cellular_process localization regulation_of_biological_process response_to_stimulus signaling single-organism_process		binding catalytic_activity
173	Cotton_D_gene_10013099	locus=scaffold196:267588:270250:- [translate_table: standard]	14686.9	0.112	-|2|-	-|2|-	-/CotAD_35678/-	Cotton_D_gene_10013099	MNKKEILKLAKGFRGRAKNCIRIARERVEKALQYSYRDRRNKKRDMRSLWIQRINAGTRQHGVNYGNFMHGLMKENIQLNRKVLSEISMHEPYSFKALVDISRNAFPGNKNVVLPTRKADISINV	95.2	7e-85	gi|313586591|gb|ADR71306.1|	50S ribosomal protein L20 [Hevea brasiliensis]	62.86	9e-45	sp|B6IPJ8|RL20_RHOCS	50S ribosomal protein L20 OS=Rhodospirillum centenum (strain ATCC 51521 / SW) GN=rplT PE=3 SV=1	94.44	7e-82	B9GNB5	B9GNB5_POPTR 50S ribosomal protein L20 OS=Populus trichocarpa GN=POPTRDRAFT_816868 PE=3 SV=1	BS_rplT	96.3	2e-26	COG0292	Ribosomal protein L20	J	Translation, ribosomal structure and biogenesis ;	K02887|1|7e-87|251|tcc:TCM_027603|EC[not_get]	cellular_component_organization_or_biogenesis cellular_process metabolic_process	cell cell_part macromolecular_complex	binding catalytic_activity structural_molecule_activity
174	CotAD_73237	locus=Dt_chr4:36367651:36371665:+ [translate_table: standard]	59488.7	0.017	1|-|-	1|-|-	CotAD_74619;Cotton_D_gene_10030418/-/-	CotAD_73237	MATASASVTSPLLQKISLTGFSTRTRHASKLKLSLHQSCTFAPFSLLSPTKSSRLKNISSLESRAYVTGPPIVSESDPRINGLETNTVGAEPPKLISWRLLLSLLLSLLFQHKLRISVSVLALVGGTTCTLSMPIFSGRFFEVLIGARKEPLWKLLSKVGLLYSLEPIFTVIFVVNMNTLWETVMSTLRAQIFRRVLIQKAEFFDRYKVGELSGLLTSDLGSLKDVVVGTICILFALSPQLAPILGLLMLFVSVSVAIYKRSTVPVFKAHGMAQASMSDCVTETFSAIRTVRSFGGEKRQMLMFGSQVLAYQRSGMKLGTFKSINESLTRVAVYISLLALYCLGGSKVKAGELSVGTVASFIGYTFTLTFAVQGLVNTFGDLRGTFAAVERINSVISGA…	70.32	0	gi|359490406|ref|XP_002280266.2|	PREDICTED: ABC transporter B family member 28-like [Vitis vinifera]	71.94	0	sp|Q8LPQ6|AB28B_ARATH	ABC transporter B family member 28 OS=Arabidopsis thaliana GN=ABCB28 PE=2 SV=1	70.32	0	D7TMX7	D7TMX7_VITVI Putative uncharacterized protein OS=Vitis vinifera GN=VIT_16s0100g00350 PE=3 SV=1	BS_yknV	96.7	2e-20	COG1132	ABC-type multidrug transport system, ATPase and permease components	V	Defense mechanisms ;	K05655|1|0.0|733|fve:101303858|EC[not_get]	cellular_process localization		binding catalytic_activity transporter_activity
175	Cotton_D_gene_10010340	locus=scaffold357:518314:521805:+ [translate_table: standard]	63755.5	0.094	2|3|3	4|4|6	CotAD_20909/CotAD_20909/CotAD_20909	Cotton_D_gene_10010340	MTILSFFTRASRAFNGYPASAKLLLLCTLSLSGGGVVAYSEAQVDASKTSVQVNEKDCKKKRVVVLGTGWAGISFLKDLDVSAYDVQVVSPRNYFAFTPLLPSVTCGTVEARSIVEPVRNIIKKRNGEIQFWEAECMKIDAANKKLLCRYTVENNLVGNDEFSLEYDYLVLAVGAQVNTFNTPGVLENCHFLKEVEDAQKIRRTVIDCFEKAVLPGLSEEERRINLHFVIVGGGPTGVEFAAELHDFVQEDLVNLYPSVKDMVKITVIQSGDHILNMFDERISSFAEQKFRRDGIEVQTGSRVISVSDKEITMKLKAKGEICSVPHGLVVWSTGVETRPFVKDFMGQIGQANRRVLATDEWLRVKGCEDVYALGDCATINQRKVMEFKDVIDDILERYP…	78.01	0	gi|224124644|ref|XP_002319383.1|	predicted protein [Populus trichocarpa]	68.9	0	sp|Q1JPL4|NDB1_ARATH	-	78.01	0	B9I6A2	B9I6A2_POPTR Predicted protein OS=Populus trichocarpa GN=POPTRDRAFT_571795 PE=4 SV=1	Zndh	116	2e-27	COG1252	NADH dehydrogenase, FAD-containing subunit	C	Energy production and conversion ;	K17871|1|0.0|1011|tcc:TCM_007949|EC[not_get]	metabolic_process		binding catalytic_activity
176	Cotton_D_gene_10039722	locus=scaffold55:854034:855596:- [translate_table: standard]	31852.6	0.029	-|1|-	-|1|-	-/-/-	Cotton_D_gene_10039722	MAKTKGSVKKVTKSVKEHSSLTTTVRELESSMRTKKKESMIFLKKVAKDRFQDNSLKLNFHPQQGILLSQQQDLGKVHHCSRRLNPIDANKFIDLCNTKVDKGIVPRNDEKVLDNKGPINEASIERMTRGKDTPTMKEAETSKMRKGKTKAESKGTNLTAVTSLLHKMKDIKKLANSISNNQKRNQGTLRSACKGLIAWLRVTSLLSRGSCVEEEVAVRDEEVIVADENEKDKKEDAKKESAQNIVTSPDFVGVTTDNLERDELDWRKLQMKQPMMPRQS	-	-	-	-	-	-	-	-	-	-	-	-	-	-	-	-	-	-	-	-	-	-	-
177	Cotton_D_gene_10033024	locus=scaffold28:2784187:2785121:- [translate_table: standard]	16366.3	0.123	1|-|1	1|-|1	CotAD_03778;CotAD_37255/-/CotAD_03778;CotAD_37255	Cotton_D_gene_10033024	MGSLDLSSGSEVVTIHVNEAKNLLQSGYRYIDVRTVEEFEKGHVEAENILNIPYLFITPEGRVKNPEFLKEVSSLCKEEDRLIVGCQSGVRSLAATADLLKIGFKNVHDMGGGYLAWVENGHPIKMEEPKKIQEPAIVEDKPNEEL	69.47	5e-64	gi|224133664|ref|XP_002327650.1|	predicted protein [Populus trichocarpa]	58.47	3e-48	sp|Q9FKW8|STR18_ARATH	Thiosulfate sulfurtransferase 18 OS=Arabidopsis thaliana GN=STR18 PE=1 SV=1	69.47	6e-63	B9MXE0	B9MXE0_POPTR Predicted protein OS=Populus trichocarpa GN=POPTRDRAFT_741223 PE=4 SV=1	MA3178	47.8	5e-07	COG0607	Rhodanese-related sulfurtransferase	P	Inorganic ion transport and metabolism ;	K15692|1|5e-56|184|jcu:105629434|EC[not_get]	-	-	-
178	CotAD_07333	locus=scaffold72.1:1725533:1726898:+ [translate_table: standard]	42306.6	0.295	1|-|2	11|-|16	CotAD_06249;Cotton_D_gene_10002777/-/CotAD_06249;Cotton_D_gene_10002777	CotAD_07333	MDQVQHPSVMQKVAGQLLRSSHSQDFQGYNRSYRSHALYQRRAAYGNYSNAALQYPVRACGDLSMVPSTASAICVQAPAEKGFASFAIDFLMGGVSAAVSKTAAAPIERVKLLIQNQDEMIKSGRLSEPYKGIGDCFKRTIKDEGFGSLWRGNTANVIRYFPTQALNFAFKDYFKRLFNFKKDRDGYWKWFAGNLASGGAAGASSLLFVYSLDYARTRLANDAKAAKKGGERQFNGLVDVYRKTLKSDGIAGLYRGFNISCVGIIVYRGLYFGMYDSLKPVLLTGSMQDSFFASFALGWLITNGAGLASYPIDTVRRRMMMTSGEAVKYKSSLDAFSQILKNEGGKSLFKGAGANILRAIAGAGVLAGYDKLQLIVFGKKYGSGGA	97.15	0	gi|3334115|sp|O22342.1|ADT1_GOSHI	RecName: Full=ADP,ATP carrier protein 1, mitochondrial; AltName: Full=ADP/ATP translocase 1; AltName: Full=Adenine nucleotide translocator 1; Short=ANT 1; Flags: Precursor	97.15	0	sp|O22342|ADT1_GOSHI	ADP,ATP carrier protein 1, mitochondrial OS=Gossypium hirsutum GN=ANT1 PE=2 SV=1	91.43	0	B9T0Z2	B9T0Z2_RICCO ADP,ATP carrier protein, putative OS=Ricinus communis GN=RCOM_0404010 PE=3 SV=1	-	-	-	-	-	-	-	K05863|1|0.0|705|tcc:TCM_005890|EC[not_get]	localization	cell cell_part membrane membrane_part organelle organelle_part
179	CotAD_59919	locus=scaffold2309.1:163159:165637:+ [translate_table: standard]	51480.3	0.221	2|3|2	2|3|3	Cotton_D_gene_10018494;CotAD_03058/Cotton_D_gene_10018494;CotAD_03058/Cotton_D_gene_10018494;CotAD_03058	CotAD_59919	MLDINLFREEKGHKPEIIRESQRRRFAKVEDVDAIIDLDKVYRQLLYDLENLRKEFNKINKQVAQLKIAKQDATETIAKTEEIKQKIAVKDTEVKDAWAVLKSKLEKIGNLVHDSVPISDDEANNAVIRTWGEKRSEPKLKNHVDLVELLGIADTKKGADVAGGRGFYLKGDGVRLNQALINFGLDFLEKRGYTALQTPFFMRKDVMAKCAQLAQFDEELYKVTGEGDDKYLIATAEQPLCAYHVDDWIQPSELPIRYAGFSSCFRKEAGSHGRDTLGIFRVHQFEKVEQFCITSPNGNDSWDMHEEMLKNSEEFYQEIKLPYQIVAIVSGALNDAAAKKYDLEAWFPASQTYRELVSCSNCTDYQSRRLEIRYGQKKNNEQAKQYVHLLNSTLTATER…	83.45	0	gi|225450981|ref|XP_002284787.1|	PREDICTED: seryl-tRNA synthetase [Vitis vinifera]	78.27	0	sp|Q39230|SYS_ARATH	Serine--tRNA ligase OS=Arabidopsis thaliana GN=At5g27470 PE=2 SV=1	83.45	0	D7U1Z6	D7U1Z6_VITVI Putative uncharacterized protein OS=Vitis vinifera GN=VIT_14s0128g00370 PE=3 SV=1	APE1976	281	1e-89	COG0172	Seryl-tRNA synthetase	J	Translation, ribosomal structure and biogenesis ;	K01875|1|0.0|879|tcc:TCM_006354|EC[not_get]	cellular_process metabolic_process single-organism_process	cell cell_part	binding catalytic_activity
180	CotAD_14305	locus=Dt_chr8:2623793:2631423:- [translate_table: standard]	84648.1	0.11	1|1|1	1|1|1	-/-/-	CotAD_14305	MSSMEIDFKQYELRCQLRGHEDDVRGICVCGSEGIATSSRDRTVRFWSLDSSDKRKYVSSKMLLGHSSFVGPLAWIAPDEEFPEGRIVSGGMDTMVFVWDLRTGEKVQSLKGHQLQVTGVVLDGGDIISSSVDCTLRRWRKGQPVESWEAHKSAIQAVIKLPSGELVSGSTDTTLKLWRGKTCLHTFSGHTDTVRGLAVMHGLGILSASHDGSIMLWAQSGEVLMVMVGHTSIVYSVDAHVSGLIVSGSEDRFAKIWKDGVCVQSLEHPSCVWDAKFLENGDIVTACSDGVVRIWTVDQENIADPVELEAYASELSEYKLSRKSVGGLKLVDLPGLEALQIPGTSDGQTKIVREGDNGVAYSWNMREQKWDKIGEVVDGPDDSMKRSVHDGVQYDYVFD…	80.24	0	gi|462397202|gb|EMJ03001.1|	hypothetical protein PRUPE_ppa001837mg [Prunus persica]	32.13	4e-123	sp|Q9Y263|PLAP_HUMAN	Phospholipase A-2-activating protein OS=Homo sapiens GN=PLAA PE=1 SV=2	78.39	0	I1LQ62	I1LQ62_SOYBN Uncharacterized protein OS=Glycine max GN=Gma.37757 PE=4 SV=1	sll1491	50.4	8e-06	COG2319	FOG: WD40 repeat	R	General function prediction only ;	K14018|1|0.0|1377|tcc:TCM_007281|EC[not_get]	-	-	-
181	Cotton_D_gene_10030384	locus=scaffold14:1559878:1563196:- [translate_table: standard]	26040.1	0.13	1|1|2	1|1|3	CotAD_47401/CotAD_47401/CotAD_47401	Cotton_D_gene_10030384	MADSAFKKVQIQRDDTAFDAYVVGKEDAPGIVVLQEWWGVDFEIKNHALKISQLGPGFKALIPDLYRGKVGLDVAEAQHLMDGLDWQGAVKDICASVDWLKANGSKKVGVTGFCMGGALSIASSVLVPQVDAVAAFYGVPSPELADPAQAKAPVQAHFGELDNFVGFSDVTAAKALEEKLKESKTPYEVHIYPGNAHAFMNRSPDGIKRRKGMGMADEDEAAVRLAWSRFESWMARFLS	90.04	2e-151	gi|470103051|ref|XP_004287959.1|	PREDICTED: protein usf-like [Fragaria vesca subsp. vesca]	31.43	3e-19	sp|P46209|USF_AQUPY	Protein usf OS=Aquifex pyrophilus GN=usf PE=4 SV=1	87.39	4e-146	B9IAH2	B9IAH2_POPTR Predicted protein OS=Populus trichocarpa GN=POPTRDRAFT_732264 PE=4 SV=1	sll1298	62	5e-11	COG0412	Dienelactone hydrolase and related enzymes	Q	Secondary metabolites biosynthesis, transport and catabolism ;	K01061|1|1e-152|428|tcc:TCM_002091|EC[not_get]	response_to_stimulus	cell cell_part organelle	catalytic_activity
182	CotAD_45089	locus=Dt_chr4:15500683:15502692:- [translate_table: standard]	76611.4	0.01	1|-|-	2|-|-	-/-/-	CotAD_45089	MASLKLSLSWDSVDSKKLSFYVNPSHLPDQCSSFSFTSCFHVARAASMLTSLTRLKHIRVEPANVPDPNPVDRDTPFSSKNELVNENPKLVEGRKGQNRKKGITRNVDFRFGSRRSGNEVEKGDLFVCRNSGLDVDYTAIKPDLNLEHCNSILKRLEKSNDGNALRFFEWMRSNGKLDGNVTAYRLVLRVLGRRQDWDAAEILVRQAKCDSGCELDFQVFNTIIYACSKRGIVEMGAKWFRMMLEHGVQPNVATYGMLMGLYQKGWNVRDAEFALSQMRSSGIVCQSAYSAMITIYTRLSLYDKAEEVISFMREDKVALNLENWLVMLNAYSQSGKLEEAEQVLVSMQEAGFSPNIVAYNTLITGYGRASNMDAAQLVFLSIRQVGLEPDGTTYRSMIE…	64.08	0	gi|255574996|ref|XP_002528404.1|	pentatricopeptide repeat-containing protein, putative [Ricinus communis]	57.89	0	sp|O65567|PP342_ARATH	Pentatricopeptide repeat-containing protein At4g30825, chloroplastic OS=Arabidopsis thaliana GN=At4g30825 PE=2 SV=2	64.08	0	B9SQY5	B9SQY5_RICCO Pentatricopeptide repeat-containing protein, putative OS=Ricinus communis GN=RCOM_1406220 PE=4 SV=1	-	-	-	-	-	-	-	K17710|1|2e-40|160|smo:SELMODRAFT_61162|EC[not_get]			binding
183	CotAD_44470	locus=scaffold1521.1:290160:293776:+ [translate_table: standard]	85007	0.335	2|-|2	9|-|4	-/-/-	CotAD_44470	MASHIVGYPRMGPKRELKFALESFWDKKSSAEDLQKVAADLRSSIWKQMAAAGIKYIPSNTFSYYDQVLDATSILGAVPPRYGWNGGEIGFDTYFSMARGNASVPAMEMTKWFDTNYHFIVPELGPDVNFSYASHKAVDEYKEAKALGVDTIPVLIGPVSYLLLSKPAKGVEKTFSLLSLLPKILPIYKEVIAELKAAGALWIQFDEPTLVLDLDSHQLQAFTAAYAELETTLSGLNVLIETYFADLTAEAYKTLTELKGVTAYGLDLVRGTQTIELIKSNFPKGKYLFAGVVDGRNIWANDLASSLSTLQALEAVVGKDKLVVSTSCSLLHTAVDLVNATKPDDEIKSWLAFAAQKVVEVNALAKALAGQKDEAFFTANASAQASRKSSPRVTNEAVQ…	91.76	0	gi|462399797|gb|EMJ05465.1|	hypothetical protein PRUPE_ppa001783mg [Prunus persica]	89.8	0	sp|Q42699|METE_CATRO	5-methyltetrahydropteroyltriglutamate--homocysteine methyltransferase OS=Catharanthus roseus GN=METE PE=2 SV=1	91.9	0	B9SI90	B9SI90_RICCO 5-methyltetrahydropteroyltriglutamate--homocysteine methyltransferase, putative OS=Ricinus communis GN=RCOM_1321820 PE=3 SV=1	L0100	668	0	COG0620	Methionine synthase II (cobalamin-independent)	E	Amino acid transport and metabolism ;	K00549|1|0.0|1453|tcc:TCM_025862|EC[not_get]	cellular_process metabolic_process single-organism_process		binding catalytic_activity
184	CotAD_54093	locus=Dt_chr5:39664779:39665645:+ [translate_table: standard]	31465.4	0.042	1|1|-	1|1|-	Cotton_D_gene_10036657/Cotton_D_gene_10036657/-	CotAD_54093	MATQVASQPPSSTQPTFKPFGVAVKPSEESNQLKDVAPITAAAKEKPKEMEIRKKVGEERRKGTKKGSTHEEPTTVTTKLVAAASEAGTKTRELLGAVLEKGKGHLEKQEDTERKNTLTSSSSDERQIKTASSTYPKGGSRPSNSHETNVDSKSEQVPLHKEIREDISKFVHALVTGKPKLHTDEKSVNIVTLAGENSGASFRCISESTTKDGEGRSKGRKPVGSVIKDDVAQKAYVNSNTQSINNSIMLESRLEGRNPGVHLEFFDDAKELRQVKLVNLFFPLKPIK	35.69	1e-31	gi|255538680|ref|XP_002510405.1|	oxidoreductase, putative [Ricinus communis]	-	-	-	-	35.69	2e-30	B9R7W2	B9R7W2_RICCO Oxidoreductase, putative OS=Ricinus communis GN=RCOM_1594750 PE=4 SV=1	-	-	-	-	-	-	-	K05909|1|1e-13|74.7|pda:103715019|EC[not_get]	-	-	-
185	CotAD_27380	locus=Dt_chr9:56127681:56130657:- [translate_table: standard]	23582.7	0.2	1|2|-	1|3|-	CotAD_32163;Cotton_D_gene_10033871/CotAD_32163;Cotton_D_gene_10033871/-	CotAD_27380	MAARSFVLWLHGLGDSGPANEPIKTLFRSSEFRNTKWSFPSAPENPVTCNYGMRMPSWFDIQEIPVTADSPKAESDVLKAVQNVHAMIDKEVAAGTDPNNVFVCGFSQGGALTLASVLLYPKKLGGGAVFSGWVPFNSSMIEKFPEDAKKTPILWSHGMADRTVLFEAGQAGPPFLQQAGVTCEFKAYPGLGHSISNEELQFLESWIKTRLQSSS	87.79	4e-140	gi|359496970|ref|XP_003635387.1|	PREDICTED: acyl-protein thioesterase 1-like [Vitis vinifera]	37.33	5e-44	sp|P0CL94|APTH1_CRYNJ	Acyl-protein thioesterase 1 OS=Cryptococcus neoformans var. neoformans serotype D (strain JEC21 / ATCC MYA-565) GN=CNF02430 PE=3 SV=1	87.79	1e-135	F6HRV9	F6HRV9_VITVI Putative uncharacterized protein OS=Vitis vinifera GN=VIT_00s0515g00010 PE=4 SV=1	lin0589	53.1	5e-08	COG0400	Predicted esterase	R	General function prediction only ;	K06130|1|3e-153|427|tcc:TCM_030339|EC[not_get]	-	-	-
186	Cotton_D_gene_10037771	locus=scaffold54:5669687:5670518:- [translate_table: standard]	26245.8	0.099	2|2|2	6|7|5	CotAD_36442;CotAD_16599/CotAD_36442;CotAD_16599/CotAD_36442;CotAD_16599	Cotton_D_gene_10037771	MACCISKSVVFQQCCWRRSTYSLFGWNIGKKKTSDLKPLPNYHDTDLPFSLSLVEKTFLRGRELKCCYKATVDGFSATNFHECCDFKGPCVIIGYTNKSFKFGAFNPEGYRSTDDYYDTFDAFLFYWIDNGETDPIILPKIGGSGAALFDYARGGPQFGADGLLIGPPLAPVMGGFAGPDTNSGIGDLRQAKSRLGLSYAKRKDGKESLFGDDSKVTLEEVQVFCSPQIASLY	83.69	9e-141	gi|225427246|ref|XP_002278575.1|	PREDICTED: uncharacterized protein LOC100250549 [Vitis vinifera]	-	-	-	-	82.76	9e-138	B9N2P6	B9N2P6_POPTR Predicted protein OS=Populus trichocarpa GN=POPTRDRAFT_580094 PE=4 SV=1	-	-	-	-	-	-	-	-	-	-	-
187	CotAD_43991	locus=Dt_chr9:9084523:9088918:+ [translate_table: standard]	31574.2	0.128	-|3|1	-|4|6	-/Cotton_D_gene_10010838/Cotton_D_gene_10010838	CotAD_43991	MEAGRILQIGIPWFTRRSSPRLPNFPRFICASSIQRGSYKGPKPGRDWIADWVSKNDDAVRSMPIYVGGASLLAVLFNRAISGIAPVADASSSQSRADLLTLGLAVTNVLTGLVWLSIRPKSITPVEPQGVECQEIYSHLPESVVSEILWVWESLSAVTCCKSLVIVYDCQCIVQIGVAAKSLNIDEPFAVDAAKLMQGSLYQGVLKSGAQSCMANLSLYPGRSELPFLPSNTQAVILQPLGDRGIAVLGGDTIRGFTTSDQTWISYIGEKLDATLANYMSSMPSVVQE	70.51	4e-142	gi|255558330|ref|XP_002520192.1|	conserved hypothetical protein [Ricinus communis]	-	-	-	-	70.51	5e-141	B9S2H3	B9S2H3_RICCO Putative uncharacterized protein OS=Ricinus communis GN=RCOM_0699470 PE=4 SV=1	-	-	-	-	-	-	-	-	-	-	-
188	CotAD_61343	locus=At_chr3:10651921:10652537:+ [translate_table: standard]	15435.6	0.301	1|3|5	7|6|26	CotAD_42385;Cotton_D_gene_10036496;CotAD_25316;CotAD_35658;Cotton_D_gene_10008374;Cotton_D_gene_10036686;Cotton_D_gene_10036495;CotAD_07449;CotAD_55626;Cotton_D_gene_10004657/CotAD_42385;Cotton_D_gene_10036496;CotAD_25316;CotAD_35658;Cotton_D_gene_10008374;Cotton_D_gene_10036686;Cotton_D_gene_10036495;CotAD_07449/CotAD_42385;CotAD_25316;Cotton_D_gene_10008374;Cotton_D_gene_10036496;CotAD_35658;Co…	CotAD_61343	MARTKQTARKSTGGKAPRKQLATKAARKSAPTTGGVKKPHRYRPGTVALREIRKYQKSTELLIRKLPFQRLVREIAQDFKTDLRFQSHAVLALQEAAEAYLVGLFEDTNLCAIHAKRVTIMPKDIQLARRIRGERA	100	3e-95	gi|147826736|emb|CAN70652.1|	hypothetical protein VITISV_010022 [Vitis vinifera]	100	1e-95	sp|Q71H73|H33_VITVI	Histone H3.3 OS=Vitis vinifera PE=2 SV=3	100	4e-94	A5BX39	A5BX39_VITVI Histone H3 OS=Vitis vinifera GN=VITISV_010022 PE=3 SV=1	YKL049c	134	5e-41	COG2036	Histones H3 and H4	B	Chromatin structure and dynamics ;	K11253|1|1e-95|275|crb:CARUB_v10002094mg|EC[not_get]	cellular_component_organization_or_biogenesis cellular_process	cell cell_part macromolecular_complex organelle organelle_part	binding
189	CotAD_58708	locus=At_chr10:84230203:84233011:- [translate_table: standard]	50822.1	0.48	4|2|3	15|5|9	-/-/-	CotAD_58708	MASTLLSLASATPSASLSFHEINKGKLNRGCMNKEKTNPFIKAKSFGRVSMVVASNVSRFEGITMAPPDPILGVSEAFKADNHELKLNLGVGAYRTEELQPYVLDVVKKADKLLLEKGENREYLPIEGLAAFNKVTAELLFGVDNPVIRQQRVATVQGLSGTGSLRLAAALIERYFPGAKVLISSPTWGNHKNIFNDARVPWSEYRYYDPKTVGLDFEGMIADIKAAPEGSFILLHGCAHNPTGIDPTPEEWRVIADVIQEKNHIPFFDIAYQGFASGSLDTDAASVRMFVARGMEVIAAQSYSKNLGLYAERIGAINVVCSSPEAAARVKSQLKRIARPMYSNPPVHGARIVANIVGDSALFKEWNAEMEMMAGRIKNVRHKLFDSLSSKDKSGKDWS…	85.94	0	gi|224092554|ref|XP_002309659.1|	predicted protein [Populus trichocarpa]	84.35	0	sp|P46248|AAT5_ARATH	Aspartate aminotransferase, chloroplastic OS=Arabidopsis thaliana GN=ASP5 PE=1 SV=2	85.94	0	B9HAW0	B9HAW0_POPTR Aspartate aminotransferase OS=Populus trichocarpa GN=POPTRDRAFT_654206 PE=3 SV=1	XF0036	313	9e-103	COG1448	Aspartate/tyrosine/aromatic aminotransferase	E	Amino acid transport and metabolism ;	K00811|1|0.0|808|tcc:TCM_036935|EC[not_get]	cellular_process metabolic_process response_to_stimulus single-organism_process	cell cell_part extracellular_region organelle organelle_part	binding catalytic_activity
190	Cotton_D_gene_10032459	locus=scaffold75:3287309:3290887:- [translate_table: standard]	40650.7	0.034	-|1|-	-|1|-	-/-/-	Cotton_D_gene_10032459	MESTSFVLAIFHILYCITTYVLGSYKIKTWKTWESEAKTDNYQYYNDPERLRFVRDTSFGRRHLKFWSRSPLSVWIVCFFRQFSGSVRKVDYLTLRRGFIMIILMVGTKLQVIITKMGLRIQEKGGVVWGAPVVEPGDEHFWFDRPGFLLSLIHIILFTNAFQLAFFAWSTYEFTINSCYHEKTEDIIIRISMGVIIQVLCSYVTLPLYALVNLVGTKMRSTIFDQRIADSLKNWHHTAKENTKHGKLSKNTTPFSSKPATPTHGMSPVHLLHGYPRKSEESGHTSLTHSNFENDRWDPEDMFTNSSSHRDIDVPDVSRGGLQSERREVADVTVQEFRALEMASMSPQIP	52.29	3e-126	gi|255585080|ref|XP_002533246.1|	Protein MLO, putative [Ricinus communis]	55.04	7e-125	sp|O80961|MLO12_ARATH	MLO-like protein 12 OS=Arabidopsis thaliana GN=MLO12 PE=2 SV=2	52.29	4e-125	B9T4S7	B9T4S7_RICCO Protein MLO, putative OS=Ricinus communis GN=RCOM_0332770 PE=4 SV=1	-	-	-	-	-	-	-	K08472|1|1e-141|416|tcc:TCM_043107|EC[not_get]	developmental_process multi-organism_process multicellular_organismal_process response_to_stimulus single-organism_process	membrane
191	CotAD_01307	locus=Dt_chr10:11822119:11824453:- [translate_table: standard]	40689.1	0.036	1|1|1	2|1|1	Cotton_D_gene_10025647;CotAD_64127/Cotton_D_gene_10025647;CotAD_64127/Cotton_D_gene_10025647;CotAD_64127	CotAD_01307	MSSFLHQRPIQNPFSNAYPVSPRSSSTSQRPISIFSPTGLIILLSLMVILGVFVPWSGMPVATFSNSKKASSSLAKWRDYTLAEAASFVAKNGTLIVCAVSQPYLPFLNNWLISITRQKHQEKVLVIAEDYATLYKVNEKWPGHAVLVPPAIDSQTAHKFGSQGFFNFTSRRPQHLLKILELGYNVMYNDVDMVWLRDPFPYLEGNHDVYFTDDMAAVKALNHSHDLPPPGKKGRTYICSCMIFLRPKDGAKLVMKKWIEELQAQPWSKAKKANDQPAFNWALNKTAGLVDLYLLPQAAFPTGGLYFKNQTWVQQTKGLHVIIHNNYIIGFEKKIKRFQDYGLWFVDDHALDSPLGRL	82.96	0	gi|255541750|ref|XP_002511939.1|	conserved hypothetical protein [Ricinus communis]	30.19	7e-17	sp|Q54RP0|AGTA_DICDI	UDP-galactose:fucoside alpha-3-galactosyltransferase OS=Dictyostelium discoideum GN=agtA PE=1 SV=1	82.96	0	B9RE00	B9RE00_RICCO Putative uncharacterized protein OS=Ricinus communis GN=RCOM_1617170 PE=4 SV=1	-	-	-	-	-	-	-	K11714|1|0.0|645|tcc:TCM_005230|EC[not_get]		cell cell_part organelle
192	Cotton_D_gene_10013594	locus=scaffold120:959967:965031:+ [translate_table: standard]	98675.8	0.007	1|-|-	1|-|-	CotAD_29468;CotAD_41644;Cotton_D_gene_10001143/-/-	Cotton_D_gene_10013594	MAVEAPAKHVFDFDDDDDDDGPVVFKRNNTLSSKQNQLNSEIKKASSQRSDGHSGSRAFYVQALNGQSSSSQKNKAFPSSKSLPVRSPILSPKASTSSARTSPVKSPVANFKTPASLNDHSKQALKQNNCNVVNEGKSPIKGATEANSDDDDDLQPLSARLKGISNQGTKGASTSSTAQSHRLVSKTEIKGSTKDPDDEAPLSVRFNMKSSAGTSSSKLYDSDEKKPLASNSEQKCSTVKGKQEKSSMLSGKRPLDKGNCSDQSSAKKPKISDTPTAMKSKQLTVKAEKEKADEDDDDDIPISQRIKKSPPSNSKTSSMKQKAAKVVSSSLKKLNKKSKKEFKNSKYIKSTKVSPSSGDGQKKWSTLVHNGVIFPPPYKPHGIKLLYDGRPIDLTPEQE…	68.08	0	gi|255576254|ref|XP_002529020.1|	DNA topoisomerase type I, putative [Ricinus communis]	77.6	0	sp|P30181|TOP1_ARATH	DNA topoisomerase 1 OS=Arabidopsis thaliana GN=TOP1 PE=1 SV=1	68.08	0	B9SSQ1	B9SSQ1_RICCO DNA topoisomerase type I, putative OS=Ricinus communis GN=RCOM_0045870 PE=4 SV=1	YOL006c_1	384	2e-123	COG3569	Topoisomerase IB	L	Replication, recombination and repair ;	K03163|1|0.0|1337|tcc:TCM_030764|EC[not_get]	metabolic_process		binding catalytic_activity
193	CotAD_18152	locus=Dt_chr6:22002463:22008162:+ [translate_table: standard]	52291.9	0.231	1|1|1	5|6|6	-/-/-	CotAD_18152	MHDFSGYPVDESSHTFTPSNSISLSVDIQALQKQIDELSTFSDTPAPSVTRILYTENDVLARRYVKNLMGLAGLSVTEDVVGNIFGRWDGYEPELTAVATGSHIDAIPYSGKYDGVVGVLGAIEAINALKRSGFKPKRSLEIILFTSEEPTRFGISCLGSRLLAGSEALAEALKATVDGQNISFLEAARSAGYARDEDDLSRVFLKNDSYSAFVELHIEQAPILEEEGISIGVVTNIAAPASIKVDFEGNGGHAGGVLMPDRNDAGLAAAKLMLAIEKHATESGSLDTVGTVGILELYTGAINSIPSKAHLEIDLFLIFGRSLEGHIPVLIFIYALDIGVEDGYFRKNEELEQHDVRDIEESFRNAVINKIHKAAKSIAKKRKVTLSEFKIINQDPPAH…	71.46	0	gi|462419865|gb|EMJ24128.1|	hypothetical protein PRUPE_ppa005238mg [Prunus persica]	30.84	1e-57	sp|Q57051|Y588_HAEIN	Uncharacterized hydrolase HI_0588 OS=Haemophilus influenzae (strain ATCC 51907 / DSM 11121 / KW20 / Rd) GN=HI_0588 PE=1 SV=1	71.31	0	D7T7A4	D7T7A4_VITVI Putative uncharacterized protein OS=Vitis vinifera GN=VIT_05s0020g04900 PE=4 SV=1	AGc4327	151	2e-40	COG0624	Acetylornithine deacetylase/Succinyl-diaminopimelate desuccinylase and related deacylases	E	Amino acid transport and metabolism ;	K18151|1|0.0|639|tcc:TCM_020797|EC[not_get]	-	-	-
194	CotAD_45867	locus=At_chr9:14412847:14417121:- [translate_table: standard]	36706.6	0.088	-|-|1	-|-|1	-/-/Cotton_D_gene_10001343;CotAD_26506	CotAD_45867	MQMLCKASSAVASFPCSRVRSGQCLWPGMRQLCLRKGLVYGFMRLLSTPFKTLRGASRSLRVAEFCSVSNMSSSLQIELVPCLRDNYAYLLHDAETGTVGVVDPSEAVPIIDTLSRKNWNLTYILNTHHHHDHTGGNAELKARYGAKVIGSGIDKDRIPGIDIVLKDGDKWMFAGHEVRVIETPGHTRGHISFYFPGSGAIFTGDTLFSLSCGKLFEGTPEQMHSSLQRIMSLPDGTNVYCGHEYTLSNSKFALSIEPKNEALRLYAAHVTQLRNKGLPTIPTTLKTEKACNPFLRTSSTEIRQALDIPATMNEAEALGVIRRAKDNF	86.63	0	gi|462419554|gb|EMJ23817.1|	hypothetical protein PRUPE_ppa008497mg [Prunus persica]	73.86	1e-179	sp|Q8LDW8|GLO2D_ARATH	Probable hydroxyacylglutathione hydrolase 2, chloroplast OS=Arabidopsis thaliana GN=GLX2-4 PE=2 SV=1	84.15	0	A9PAT7	A9PAT7_POPTR Predicted protein OS=Populus trichocarpa GN=POPTRDRAFT_718302 PE=2 SV=1	SPAC824.07	135	2e-37	COG0491	Zn-dependent hydrolases, including glyoxylases	R	General function prediction only ;	K01069|1|0.0|602|tcc:TCM_019986|EC[not_get]			binding catalytic_activity
195	Cotton_D_gene_10027305	locus=scaffold158:2911535:2912700:- [translate_table: standard]	12986.7	0.17	2|1|-	3|3|-	CotAD_68452;Cotton_D_gene_10027690;CotAD_51228;CotAD_25488;Cotton_D_gene_10019618;CotAD_22403;CotAD_22120/Cotton_D_gene_10014006;CotAD_68452;Cotton_D_gene_10027690;CotAD_51228;CotAD_25488;Cotton_D_gene_10019618;CotAD_22403;Cotton_D_gene_10008518;CotAD_40255;CotAD_22120;CotAD_29543;CotAD_38803/-	Cotton_D_gene_10027305	MSKTELLSQLKDLKAELALLRVAKVTDGAPNKLSKIKVVRLSIAQVLTVISQKQKSALREAYKKKKFLPLDLRPKKTRAIRRRLTKHQASLKTQREKKKEMYFPLRKYAIKV	92.79	9e-67	gi|224088581|ref|XP_002308483.1|	predicted protein [Populus trichocarpa]	91.89	7e-66	sp|Q9M5L0|RL35_EUPES	60S ribosomal protein L35 OS=Euphorbia esula GN=RPL35 PE=2 SV=1	92.79	1e-65	A9PCH3	A9PCH3_POPTR Predicted protein OS=Populus trichocarpa GN=POPTRDRAFT_653749 PE=2 SV=1	YDL136w	105	3e-30	COG0255	Ribosomal protein L29	J	Translation, ribosomal structure and biogenesis ;	K02918|1|2e-69|206|tcc:TCM_022019|EC[not_get]	metabolic_process	cell cell_part macromolecular_complex	structural_molecule_activity
196	Cotton_D_gene_10026762	locus=scaffold67:565962:566636:+ [translate_table: standard]	23221.4	0.04	1|1|-	2|1|-	CotAD_46834;CotAD_06832/CotAD_46834;CotAD_06832/-	Cotton_D_gene_10026762	MGTPETSREPCPDRILDDLGGAFGMGAVGGAAFHFLKATNNSPSGSRLIGGTQAVRMNAPRVGGSFAVWGGLFSTFDCTMVYVRQKEDPWNSIIAGAATGGFLSMRQGLGAASRSALFGGVLLALIEGAGIMLNKFLSQPQMPIMIEEAAPNVAGMPGYPMGQLPNQAPALVDSSTQGSPESSSSWFGGVFGGGKKQEPAVGNGNKTEVLESFDAPAVPSFEYK	75.54	2e-97	gi|460410553|ref|XP_004250691.1|	PREDICTED: mitochondrial import inner membrane translocase subunit TIM17-2-like [Solanum lycopersicum]	86.9	3e-78	sp|Q9SP35|TI172_ARATH	-	73.73	5e-94	Q38M66	Q38M66_SOLTU Putative uncharacterized protein OS=Solanum tuberosum PE=2 SV=1	SPAC3A12.16c	139	3e-41	COG5596	Mitochondrial import inner membrane translocase, subunit TIM22	O	Posttranslational modification, protein turnover, chaperones ;	K17795|1|5e-114|328|tcc:TCM_037225|EC[not_get]		membrane
197	CotAD_58272	locus=scaffold3276.1:64531:67061:+ [translate_table: standard]	39104.6	0.097	1|-|-	1|-|-	CotAD_13003/-/-	CotAD_58272	MASNLQHDSTSSNEKSALTTDTKGMKSETSTIDSKTSKPEASQPAQAGASPSNMGPGFVPPNPFDFSAMSGLLEDPSIKRLAEQITKDPSFNQMAEQLTMMFQGASAEESLPEFEPQQYYSTMQQVMQNPQFMTMAERLGNALMQDPATSSMLESLSNPQQKDQIEERMTRIKEDPSLKHILEEIETGGPAAMMRYWNDKEVLQKLGEAMGLADSGDAAISVGNAAADGDDEVGNEDESIVHHCASVGDVEGLKTALTSGADKDEEDAEGRTALHFACGYGEMKCAQILVEAGARVDALDKNKNTALHYAAGYGRKDCVALLLENGAAVTLQNMDGKTPIEVAKLNNQHEVVKLLEKDGFL	88.6	0	gi|327344119|gb|AEA50964.1|	putative PDF1-interacting protein 2, partial [Gossypium barbadense]	60.68	7e-142	sp|Q9SAR5|AKR2_ARATH	Ankyrin repeat domain-containing protein 2 OS=Arabidopsis thaliana GN=AKR2 PE=1 SV=2	88.6	0	F2YRD2	F2YRD2_GOSBA Putative PDF1-interacting protein 2 (Fragment) OS=Gossypium barbadense PE=2 SV=1	FN1235	51.2	2e-06	COG0666	FOG: Ankyrin repeat	R	General function prediction only ;	K06694|1|3e-17|83.6|pvu:PHAVU_002G068900g|EC[not_get]	-	-	-
198	CotAD_06828	locus=At_chr13:25008628:25011254:- [translate_table: standard]	66987.8	0.107	2|2|3	3|4|3	-/-/-	CotAD_06828	MDISLFLFVGFSCFLLINGNKVEDCDYLTDKTSLQSFQVLLQAEQPYRTAYHFQSPQNWLNDPNGPMYYKGVYHLFYQYNPNSAWFGDGMVWAHSASYDLINWFGLDHALVPSEPFDAISCWSGSATILPGDKPVILYTGIDANYNQVQNLATPKNESDPLLVEWVKYFGNPLMTPPDGVKGDNFRDPTTAWQGPDGTWKVVIGSYSNNQGMAILFQSQDFVHWTMHRDPLYSSLKTEMWECPDFFPVSINSTNGVDTSVENPSVRHVMKASFNSHDYYTVGTYVTEQERFLPDADFTGTSLDLRFDYGKFYASKSFFDGKKNRRILCAWVNESDSMEDDLKKGWSGLQSIPRQIWLDLNGKQLVQWPVEELNSLRGNEVYVYDKQLESGSVFEVSGIT…	68.06	0	gi|224092182|ref|XP_002309497.1|	predicted protein [Populus trichocarpa]	56.4	0	sp|Q43866|INV1_ARATH	Beta-fructofuranosidase, insoluble isoenzyme CWINV1 OS=Arabidopsis thaliana GN=CWINV1 PE=1 SV=1	68.06	0	B9HDE0	B9HDE0_POPTR Predicted protein OS=Populus trichocarpa GN=POPTRDRAFT_819484 PE=3 SV=1	PM1848	83.2	3e-16	COG1621	Beta-fructosidases (levanase/invertase)	G	Carbohydrate transport and metabolism ;	K01193|1|0.0|987|tcc:TCM_037301|EC[not_get]	metabolic_process		catalytic_activity
199	CotAD_68677	locus=At_chr2:27745499:27747185:- [translate_table: standard]	34623.2	0.034	1|-|-	1|-|-	CotAD_67955;Cotton_D_gene_10013818/-/-	CotAD_68677	MAQITFIAAVCALLLSQSFISGVQGTSFTIVNKCNYVVWPGVLSNAGVSTISTTGFTLRRGESKTISAPASWGGRFWGRTHCSQDSAGKFSCLTGDCGSGKLECSGNSAAPPATLAEFTLDGAGGLDFFDVSLVDGYNVPMLVVPHGGTGQNCTYTGCVVDLNDSCPSELKVMKREGGDGVACKSACEAFRQPQYCCSGAYGTPDTCKASSYSEVFKRACPRAYRYAYDDKSSTFTCAKADYTITFCPSPNTSQKSSSEGQNTETPSTTTLINSTMVYEGALDESTASPSIFTHVFGSQAIAVTFTITIAISCSCQLLF	73.51	1e-162	gi|255538966|ref|XP_002510548.1|	Zeamatin precursor, putative [Ricinus communis]	54.04	3e-86	sp|P83332|TLP1_PRUPE	Thaumatin-like protein 1 OS=Prunus persica PE=2 SV=1	73.51	1e-161	B9R8A5	B9R8A5_RICCO Zeamatin, putative OS=Ricinus communis GN=RCOM_1598220 PE=4 SV=1	-	-	-	-	-	-	-	K14297|1|3e-26|112|zma:103640102|EC[not_get]	-	-	-
200	Cotton_D_gene_10005913	locus=scaffold226:709390:713088:+ [translate_table: standard]	34488.1	0.206	5|5|4	23|24|24	CotAD_63452;CotAD_70139/CotAD_63452;CotAD_70139/CotAD_63452;CotAD_70139	Cotton_D_gene_10005913	MAAVTGSNVVALKPAARFADPTDRKFVQIRQWSPISGGFGSVQARLCIGLQCQSKRSFASPGVKAQVATVEQASIEAAQNVEAPVAIVTGASRGIGKAVALALGKAGCKVLVNYARSSKEAEEVSKEIESYGGQAVTFGGDVSKEADVEGMIKTAVDTWGTVDILINNAGITRDTLLMRMKKSQWQEVIDLNLTGVFLCTQAAAKIMMKKKKGKIINIASVVGLVGNIGQANYSAAKAGVIGLTKTVAREYASRNINVNAVAPGFIASDMTAKLGEDLEKRILETIPLGRYGQPEEVAGLVEFLAINPASNYITGQVFTIDGGMVM	81.54	2e-167	gi|224107655|ref|XP_002314551.1|	predicted protein [Populus trichocarpa]	80.86	1e-149	sp|P28643|FABG_CUPLA	3-oxoacyl-[acyl-carrier-protein] reductase, chloroplastic OS=Cuphea lanceolata GN=CLKR27 PE=2 SV=1	81.54	3e-166	B9HTB3	B9HTB3_POPTR Predicted protein OS=Populus trichocarpa GN=POPTRDRAFT_726104 PE=3 SV=1	HI0155	205	1e-64	COG1028	Dehydrogenases with different specificities (related to short-chain alcohol dehydrogenases)	IQR	Lipid transport and metabolism ; Secondary metabolites biosynthesis, transport and catabolism ; General function prediction only ;	K00059|1|0.0|505|tcc:TCM_010763|EC[not_get]	cellular_process metabolic_process single-organism_process		binding catalytic_activity
201	CotAD_66309	locus=Dt_chr2:22465806:22468996:+ [translate_table: standard]	46942.8	0.014	-|1|-	-|1|-	-/CotAD_38977;Cotton_D_gene_10022792;CotAD_17269;CotAD_60519;Cotton_D_gene_10033092;CotAD_03849;Cotton_D_gene_10013856;Cotton_D_gene_10021398;CotAD_11048/-	CotAD_66309	MSLGIVISPANPLSSDSEIAHQVQLSKPVIAFATSTTSSKLPSLKHGTILLDSPEFISFLSEPNVDPDVINRVQVSQHDTAAVLYSSGTTGRVKGVMLSHRNLIALIAGFYHIRHPQKGPDPPHPVSFFTVPLFHVFGFFMLARAFSMGETAVFTERFEFEGMLRAIEKYKVTYMPVSPPLVLALTKSDLTNKYDISSLLMLGSGGAPLGKEVAERVKEKFPAVELVQGYGLTETGGGAARVIGPEEAARYGTVGRLSENTEAKIVDPVTGEALPPGQRGELWLRGPTVMKGYIGDENATAKTMDSEGWLKTGDICYFDSQGFLYIVDRLKELIKYKAYQVPPAELEHLLHSHPEISDAAIIPYPDEEAGQIPMAYIVRQPGSSMSEAQIMDYIAKQAC…	73.25	0	gi|255540313|ref|XP_002511221.1|	AMP dependent CoA ligase, putative [Ricinus communis]	63.7	0	sp|Q84P23|4CLL9_ARATH	4-coumarate--CoA ligase-like 9 OS=Arabidopsis thaliana GN=4CLL9 PE=1 SV=2	73.25	0	B9RAJ6	B9RAJ6_RICCO AMP dependent CoA ligase, putative OS=Ricinus communis GN=RCOM_1506860 PE=4 SV=1	MA1422	157	5e-42	COG0318	Acyl-CoA synthetases (AMP-forming)/AMP-acid ligases II	IQ	Lipid transport and metabolism ; Secondary metabolites biosynthesis, transport and catabolism ;	K10526|1|6e-134|399|fve:101300509|EC[not_get]	metabolic_process		catalytic_activity
202	Cotton_D_gene_10033197	locus=scaffold28:4017854:4021023:- [translate_table: standard]	76497.8	0.022	1|-|-	2|-|-	CotAD_03957/-/-	Cotton_D_gene_10033197	MEVQTSFPQTLMTADPPPSESIVSQEHVDGFRRVLPLVPDSLSGSSSVSPMAVDSIGTEARENPIEEETAAGPSPPPASSTESEPSKEPENCPQEEEEDERWPHGGYNSPYNYSRRDNEFKSPGSGYSSWTLSWSKHWSPKETSRNEDKPTGVGAGLENLGNTCFINAVLQCFTHTVPFVLGLRSLNHHEKPCDRDMESFCLLCALRDHIELSLHSSGGVVSPTKIFDNLNYRLESCCSKLKNDLSSIDDCLVKKVFGGRLVSRLCCCNCGHVSSTYEPLNDLSLEIEDADSLSTALESFTKVEKIEDLELNFRCENCKEQVSVEKQLMLDQAPSVATFHLKRFKTEGTYIEKIDKHVDFPLELDLQPYAVGNERNNEELRYQLFAVVKHSGFRPTSGH…	47.31	2e-150	gi|224126461|ref|XP_002329560.1|	predicted protein [Populus trichocarpa]	49.32	2e-103	sp|Q9FIQ1|UBP21_ARATH	Ubiquitin carboxyl-terminal hydrolase 21 OS=Arabidopsis thaliana GN=UBP21 PE=2 SV=1	47.31	3e-149	B9N2M4	B9N2M4_POPTR Ubiquitin carboxyl-terminal hydrolase OS=Populus trichocarpa GN=POPTRDRAFT_827644 PE=3 SV=1	SPCC16A11.12c	59.3	2e-08	COG5560	Ubiquitin C-terminal hydrolase	O	Posttranslational modification, protein turnover, chaperones ;	K11855|1|0.0|800|tcc:TCM_015710|EC[not_get]			catalytic_activity
203	CotAD_02770	locus=Dt_chr9:41982682:41990837:+ [translate_table: standard]	126673	0.008	-|1|-	-|1|-	-/Cotton_D_gene_10017887;CotAD_61584/-	CotAD_02770	MSCYSAIFQGYLRTTAMSLRPASLQLNNSPKILLKPCSFSFGASTLDNIDEWRWKLTMLLRNKDEQEVVSRERKDRRDFEQLSALATRMGLNSRQYAKVVVFSKLPLPNYRSDLDDKRPQREVVLPFGLQRDVDLHLKAYLSHKAMSSGRSLDKPLIRSNSGGIPAADEVPVNPEPFAQNSVALERILRRRSLQIRDKQQEWQESPEGQKMLEFRRSLPAYKERDALLNAISQNQVVVVSGETGCGKTTQLPQYILESEIEAARGASCSIICTQPRRISAMAVSERVAAERGEKLGESVGYKVRLEGMKGRDTRLLFCTTGILLRRLLVDRDLRGVSHVIVDEIHERGMNEDFLLIVLKDLLPRRPELRLILMSATLNAELFSSYYGGAPTIHIPGFTY…	82.33	0	gi|359491476|ref|XP_002277625.2|	PREDICTED: probable ATP-dependent RNA helicase DHX36-like [Vitis vinifera]	43.69	0	sp|Q8VHK9|DHX36_MOUSE	Probable ATP-dependent RNA helicase DHX36 OS=Mus musculus GN=Dhx36 PE=2 SV=1	82.36	0	D7SJ55	D7SJ55_VITVI Putative uncharacterized protein OS=Vitis vinifera GN=VIT_17s0000g03030 PE=4 SV=1	PM0769	171	2e-42	COG1643	HrpA-like helicases	L	Replication, recombination and repair ;	K14442|1|0.0|1897|tcc:TCM_012528|EC[not_get]	-	-	-
204	Cotton_D_gene_10018894	locus=scaffold76:316506:322959:- [translate_table: standard]	40959.9	0.058	1|-|-	3|-|-	-/-/-	Cotton_D_gene_10018894	MLTFEGQKIQGSQSIVAKLSSLPFQWCQHSITAVDCQPSGVGGMLVFVSGTLQLIRMETPSGIKDSIPAWIKFSVQAPGEIPNNGIYYDPPEEVIVSARKPEFFQMSHPLYEVVTGEGLMRPCFKTRTGGLYSGGSAQMVENSLNIHGDEILYVGDHIYTDYKALIHSRGPRATVVELINQKEVVGDLFNQLRLALQCRTKGRPAQTLAATNMDDRELTESMQKLLIVMQRLQYSLLLAQLFAQNYAARHFGPAYFSFTITILYLKAKILANVKKTGCSQGTITDWDIYRMAEDTVLKQRVEESEDPEEEKKEEKDPIEIEPMLSVEIPDKAKPTELVIKPDVATSMIKLNRLAQIFEMSFQS	74.14	2e-82	gi|224100369|ref|XP_002311850.1|	predicted protein [Populus trichocarpa]	76.27	7e-21	sp|Q9C7F5|NTF2_ARATH	Nuclear transport factor 2 OS=Arabidopsis thaliana GN=NTF2 PE=2 SV=1	74.14	2e-81	B9HMQ5	B9HMQ5_POPTR Predicted protein (Fragment) OS=Populus trichocarpa GN=POPTRDRAFT_720206 PE=4 SV=1	-	-	-	-	-	-	-	K00700|1|7e-18|88.6|jcu:105629464|EC[not_get]			catalytic_activity
205	Cotton_D_gene_10015327	locus=scaffold155:1349110:1351139:- [translate_table: standard]	24327	0.055	1|1|1	1|2|3	CotAD_10461/CotAD_10461/CotAD_10461	Cotton_D_gene_10015327	MAMGFLGFALFLFLSLDLDQGSTSSASAASSSSTSQNVEITYGTVLKLMHEKTKFRLHSHDVPYGSGSGQQSVTGFPNVDDSNSYWIVRPEPDTSAKQGDTIPSGTIIRLQHMRTRKWLHSHLHASPISGNLEVSCFGGESESDTGDYWRLIIEGSGKTWKQDQKIRLQHVDTGGYLHSHDKKYARIAGGQQEVCGVREKRADNVWLAAEGVYLPITESK	94.05	1e-129	gi|359806084|ref|NP_001241440.1|	uncharacterized protein LOC100792538 precursor [Glycine max]	81.52	5e-115	sp|Q93ZE8|SDF2_ARATH	Stromal cell-derived factor 2-like protein OS=Arabidopsis thaliana GN=At2g25110 PE=1 SV=1	94.05	1e-128	C6TJ58	C6TJ58_SOYBN Uncharacterized protein OS=Glycine max GN=Gma.4549 PE=2 SV=1	YJR143c	49.7	2e-06	COG1928	Dolichyl-phosphate-mannose--protein O-mannosyl transferase	O	Posttranslational modification, protein turnover, chaperones ;	-		cell cell_part	catalytic_activity
206	CotAD_67419	locus=At_chr2:3745625:3748435:+ [translate_table: standard]	59002.1	0.068	-|-|1	-|-|1	-/-/-	CotAD_67419	MNNNHLNVLTSVFLKQVRRLLERAHSVSKSWDDAPVVLCGDFNCTPKSPLYNFISEQKLDLSEVNRDKVSGQASAEIPLQTYNPNSGAQSGNIPAQFPPAVDIKRIGMDKNDSHSDTKKQNNLDRNMKDASVNMSGSSETMQDLSDMSCNNLRMGGNDSAEYDEVTEIQCGVVDMQRFSPGRSSCPENVCSGITEMEHIGTDVTIHSNNGKALDDIVMNNHSNGITTDPELLSTSQSETSSTEPLYQTHLLDAIEVSPPNILACQSSESVADDHRDRHPVPSQVDFSGLSAGTDIELEEKMDNLSLEERSKTSTDIEVEEKMDNLSPEEHSKTMVESENIVEDNNAFVDALYGNQDRHPTNSSQSVTSDLDHSSLEFLSSQDSQFLLPSADVLDDVLPS…	41.3	1e-107	gi|470113605|ref|XP_004293013.1|	PREDICTED: carbon catabolite repressor protein 4 homolog 6-like [Fragaria vesca subsp. vesca]	70.34	1e-47	sp|Q8VYU4|CCR4F_ARATH	Carbon catabolite repressor protein 4 homolog 6 OS=Arabidopsis thaliana GN=CCR4-6 PE=2 SV=2	41.41	3e-99	D7SUM2	D7SUM2_VITVI Putative uncharacterized protein OS=Vitis vinifera GN=VIT_04s0008g04720 PE=4 SV=1	-	-	-	-	-	-	-	K18729|1|1e-42|166|atr:18444703|EC[not_get]	-	-	-
207	CotAD_57826	locus=At_chr7:30198010:30200033:+ [translate_table: standard]	26622.3	0.055	1|-|-	1|-|-	-/-/-	CotAD_57826	MAVGLRHFTARAGNGVGEPILDTDNGEELVHVQPSVSVAVGNRASESLGTLYITTRQVIWLSELDREKGYAVDFLSLSLHAVSRDPEAYPSPCIYTQIETEADEVEDESEDSDSECSEVLDLSKIREMRFIPSDANQLDTLFQVFCECAELNPEPIEEGEEEGHNWIFSADQLEDEAGGDDVEWHFSQNPTNTIGHSNGHHDLASSVLELQINDQRFEDAEEMEQDADTGHHHQSQQ	71.55	8e-103	gi|284449853|emb|CBJ19441.1|	nucleotide-sensitive chloride conductance regulator [Citrus clementina]	66.95	1e-90	sp|Q9LVA7|ICLN_ARATH	Chloride conductance regulatory protein ICln OS=Arabidopsis thaliana GN=At5g62290 PE=2 SV=1	71.55	1e-101	D2U835	D2U835_9ROSI Nucleotide-sensitive chloride conductance regulator OS=Citrus clementina GN=icln1 PE=2 SV=1	-	-	-	-	-	-	-	K05019|1|5e-111|321|tcc:TCM_047012|EC[not_get]	-	-	-
208	CotAD_75911	locus=At_chr13:5478993:5481397:+ [translate_table: standard]	24995.4	0.493	2|2|2	14|6|6	-/-/-	CotAD_75911	MASSIISLQTSNLRSAFLGEKNGSCVSSIPITRVSLVRKAIECKESRIGKQPITVPSNVTITMEGQDIKVKGPLGEMALTYPREVKVDREESGALRIRKSVETRRANQMHGLFRTLTDNMVVGVSKGFEKRLQLIGVGYRATLEGKDLVLSLGFSHPVRMAIPDDIQVKVEENTRIVVSGYDKSDVGQFAATIRKWRPPEPYKGKGVKYADEVVRRKEGKAGKKK	80.97	2e-136	gi|359485565|ref|XP_002279657.2|	PREDICTED: 50S ribosomal protein L6, chloroplastic-like [Vitis vinifera]	76.44	3e-127	sp|O23049|RK6_ARATH	50S ribosomal protein L6, chloroplastic OS=Arabidopsis thaliana GN=RPL6 PE=1 SV=1	80.97	3e-135	D7TEL8	D7TEL8_VITVI Putative uncharacterized protein OS=Vitis vinifera GN=VIT_12s0059g02250 PE=3 SV=1	SMc01294	164	1e-50	COG0097	Ribosomal protein L6P/L9E	J	Translation, ribosomal structure and biogenesis ;	K02933|1|2e-150|420|tcc:TCM_011338|EC[not_get]	metabolic_process	cell cell_part macromolecular_complex	binding structural_molecule_activity
209	CotAD_72359	locus=scaffold3771.1:48961:50531:+ [translate_table: standard]	36811.1	0.065	1|-|-	1|-|-	-/-/-	CotAD_72359	MGVNAENKFPAIEFRSSDLKRGTDGWRNLCKKVQEACEKFGCFEVVYDTISTKVREESFGLMKELVEVPVERKQKNTSPMPYHGWVGPCEQVSLLYEGFGIGNASNYDSVKSFTQLMWPEGHPHFCDTIHTIGTQMEELNKLIWLMLIDSYGLGDDSLKLNYTTLVRMMKYMAPPPGEYERGLFAHTDKPVSTLICEDQVSGLEIEVNDGQWIKLTNLSPSSFVYVVGDPLRAWSNGRLKSVNHRVMMSGDKDRYSIAAFAIPNEGTIIKTPKELIDDQHPQLFKDFDFMEFFLFAFSNPARHIDNGELLHVFAGLSPPVSN	50.91	6e-110	gi|470113512|ref|XP_004292967.1|	PREDICTED: gibberellin 3-beta-dioxygenase 3-like [Fragaria vesca subsp. vesca]	27.84	1e-18	sp|O49561|G2OX8_ARATH	Gibberellin 2-beta-dioxygenase 8 OS=Arabidopsis thaliana GN=GA2OX7 PE=1 SV=2	51.41	4e-102	B9RPC7	B9RPC7_RICCO Gibberellin 3-beta-dioxygenase, putative OS=Ricinus communis GN=RCOM_0927530 PE=3 SV=1	PA4191	52.4	4e-07	COG3491	Isopenicillin N synthase and related dioxygenases	R	General function prediction only ;	K04124|1|3e-25|107|vvi:100265167|EC[not_get]!K04125|2|1e-23|102|sot:102582860|EC[not_get]			catalytic_activity
210	Cotton_D_gene_10002217	locus=scaffold375:74194:78435:- [translate_table: standard]	78185.5	0.013	1|-|-	1|-|-	CotAD_70525;CotAD_60832/-/-	Cotton_D_gene_10002217	MDEKPEGHTDGIHKEDQGKPVEVEEMHSLNISKDDVNKLEDGNKEDKDDKHVEQGDRMNKDGDLDSKAQEEVNETTREDLAEEEQEPVFDGTEVPGMQANRSSSTRSLDPDPEEEGSVWPEKAVALKNFVKEKGAAVTSVLRRLSLKRDGVEQANVDVDKDTSDSAKLGEQAAMSPRTAERSAWNPLNYIKVSRDTDSESKAEQGKNIIEESLLPIATKGRIILYTRLGCRDCREARLFLQRKRLRYVEINIDVYPSRKLEIEKVSGSCAVPKVILNEVLIGGLSELKGLDESGKLDEKIDFFISEAPSPEAPLPPLPGEDDVSDNGPVDELAVIVQKMKATIVVKDRLYKMRRFTNCFLGSEAVDFLSEDQYLEREEAVEFGQKLASEHFFRHVLDEN…	69.08	0	gi|462422178|gb|EMJ26441.1|	hypothetical protein PRUPE_ppa001753mg [Prunus persica]	35.53	1e-09	sp|Q9HU55|GLRX_PSEAE	Glutaredoxin OS=Pseudomonas aeruginosa (strain ATCC 15692 / PAO1 / 1C / PRS 101 / LMG 12228) GN=grx PE=3 SV=1	70.49	0	B9RJD7	B9RJD7_RICCO Electron transporter, putative OS=Ricinus communis GN=RCOM_1033310 PE=4 SV=1	RP204	47	4e-06	COG0695	Glutaredoxin and related proteins	O	Posttranslational modification, protein turnover, chaperones ;	-	biological_regulation cellular_process regulation_of_biological_process response_to_stimulus signaling single-organism_process		catalytic_activity
211	CotAD_08618	locus=Dt_chr3:23142886:23149625:- [translate_table: standard]	55356.6	0.026	1|-|-	1|-|-	Cotton_D_gene_10036559;CotAD_37064/-/-	CotAD_08618	MASSSLPLQEVHFLSPRTTSKHRFYLSRCSSLSRVSLAGNGHLRNGVVLRSRVRALKEEGVSYEEREREFIKEVNGGFGSNGNGSASKYVYKNGSVEGYNNANGGVGVVESEGNGSLVKYVNGNGNGAAAEVMAAEVMQVVEKEGVVSEEARKKRVEDIGKEEAWFKRSTQDQVEVSVAPGGRWSRFKTYSTIQRTLEIWGFVLTFVFKAWLNNQKFSYQGGMTEEKKVLRRKALAKWLKESILRLGPTFIKIGQQFSTRVDILAQEYVDQLSELQDQVPPFPSETAVSIVEEELGAPVGVIFDRFDYEPIAAASLGQVHRAKLKGQEVVVKVQRPGLKSLFDIDLKNLRVIAEYLQKIDPKSDGAKRDWVAIYDECASVLYQEIDYTKEAANAELFAS…	74.42	0	gi|224096282|ref|XP_002310598.1|	predicted protein [Populus trichocarpa]	54.98	3e-106	sp|P73627|Y1770_SYNY3	Uncharacterized protein sll1770 OS=Synechocystis sp. (strain PCC 6803 / Kazusa) GN=sll1770 PE=3 SV=1	74.42	0	B9HFX0	B9HFX0_POPTR Predicted protein OS=Populus trichocarpa GN=POPTRDRAFT_871134 PE=4 SV=1	aarF	151	2e-39	COG0661	Predicted unusual protein kinase	R	General function prediction only ;	K08869|1|4e-105|332|bdi:100837357|EC[not_get]!K13457|2|9e-105|331|vvi:100252764|EC[not_get]	-	-	-
212	Cotton_D_gene_10009967	locus=scaffold164:418673:421293:+ [translate_table: standard]	21460	0.153	1|1|1	2|1|1	CotAD_34680/CotAD_34680/CotAD_34680	Cotton_D_gene_10009967	MGEVFEGYERQYCELSANLSKKCTASGALNGEKKKQKLSEIKAGLEDAEALIRKMDLEARSLQPNVKAVLLAKLREYKSDLNNLKSEVKRIASGNLNPAARDELLESGMADALTASADQRSRLMTTTERLNQSSDRIKDSRRTMLETEELGVSILQDLHSQRQSLLHANNTELFDYDVNFIPKRHQHATL	91.81	2e-110	gi|255578288|ref|XP_002530011.1|	vesicle transport V-snare protein vti1a, putative [Ricinus communis]	74.85	1e-90	sp|Q9SEL6|VTI11_ARATH	Vesicle transport v-SNARE 11 OS=Arabidopsis thaliana GN=VTI11 PE=1 SV=2	91.81	3e-109	B9SVJ2	B9SVJ2_RICCO Vesicle transport V-snare protein vti1a, putative OS=Ricinus communis GN=RCOM_0537940 PE=4 SV=1	-	-	-	-	-	-	-	K08493|1|2e-113|325|tcc:TCM_018655|EC[not_get]	localization	cell cell_part
213	CotAD_71431	locus=Dt_chr5:65337394:65337954:- [translate_table: standard]	20663	0.07	-|-|1	-|-|1	-/-/CotAD_48976;Cotton_D_gene_10034221	CotAD_71431	MHTPRFGAIALLVFIIILIIILAFTVFKAKRPVTTVDSVSLSDLNFSVDLARFRVLLNATLDVDLSIKNPNKVGFKYRDSNAQLNYRGQQIGEAPIPAGKISADQTVPMNLTLTVMADRLIYNSRFFSDVTTGGVLPLYAVTRISGKVNVMNLFKIQVESSTTCDFTVFLSNSSVGDQNCKYKTKF	61.11	6e-68	gi|224140649|ref|XP_002323694.1|	predicted protein [Populus trichocarpa]	-	-	-	-	61.11	8e-67	B9IGY4	B9IGY4_POPTR Predicted protein OS=Populus trichocarpa GN=POPTRDRAFT_904693 PE=4 SV=1	-	-	-	-	-	-	-	-	-	-	-
214	Cotton_D_gene_10017666	locus=scaffold163:1446222:1447640:+ [translate_table: standard]	31450.2	0.069	1|1|1	1|1|1	CotAD_17725/CotAD_17725/CotAD_17725	Cotton_D_gene_10017666	MDSAKDDVVCLQLTAPPGWKKMLKPKKGGTPKKNEIIFTAPSGEQISNKKQLEHYLKQHPGGPVISEFDWGTGETPRRSARISEKVKAYSEPPKKRGRKSSASKDDNKESETAPEGTEDSKDVMEEAGKSEEENENENKDKTQDGNSKSEPTSKEVTRGVDAKISTNIEEGKGGGEAVSEKLKCLQDGVEMNASGLGQKETADMEDATSDGNVEQLASEAEKGLGSMEQEKPNVCVTEERKNEAEGEGKPILDRSTIESEREIEVNEAANRDEMEEAIQNGSKGSNAE	46.3	9e-64	gi|225445563|ref|XP_002285323.1|	PREDICTED: uncharacterized protein LOC100259445 [Vitis vinifera]	59.05	8e-39	sp|Q9XI36|MBD10_ARATH	Methyl-CpG-binding domain-containing protein 10 OS=Arabidopsis thaliana GN=MBD10 PE=1 SV=1	46.3	1e-62	F6HHA3	F6HHA3_VITVI Putative uncharacterized protein OS=Vitis vinifera GN=VIT_11s0016g05580 PE=4 SV=1	-	-	-	-	-	-	-	-	-	-	-
215	CotAD_58226	locus=Dt_chr8:54150150:54151882:+ [translate_table: standard]	35343.3	0.145	1|-|-	1|-|-	-/-/-	CotAD_58226	MASSPLQFSTPFRTLLLSSPSLRKSPRLPFHPSLFSPPLTQKTLTFSIGTRAVSGSGKFYWRAKASMAGTAMEKGKGKGKVEVFDSEENLSVSLAKYTADLAAKFSKEKDSFTVVLSGGSLIKSLRKLVEPPYVDAIDWSTWHVFWVDERVVPKDHDDSNYKLAFDGFLSKVPILPGNVYAINDALSAEGAADDYETCLKHLVKSNVLSVSTATGFPKFDLMLLGMGPDGHVASLFPGHPLVKENEKWVTFIKDSPKPPPERITFTFPVINSSAHIALVICGAGKAGPVHSALGNSQNSDPLPVQMVSPEGELVWFLDKDAASKL	83.27	1e-149	gi|224118424|ref|XP_002317815.1|	predicted protein [Populus trichocarpa]	74.09	4e-134	sp|A2Z3C4|6PGL4_ORYSI	Probable 6-phosphogluconolactonase 4, chloroplastic OS=Oryza sativa subsp. indica GN=OsI_031067 PE=3 SV=2	83.27	2e-148	B9I241	B9I241_POPTR Predicted protein OS=Populus trichocarpa GN=POPTRDRAFT_772510 PE=4 SV=1	CPn0239	70.9	2e-13	COG0363	6-phosphogluconolactonase/Glucosamine-6-phosphate isomerase/deaminase	G	Carbohydrate transport and metabolism ;	K01057|1|1e-178|499|tcc:TCM_015483|EC[not_get]	metabolic_process single-organism_process
216	Cotton_D_gene_10033390	locus=scaffold104:3529207:3529749:+ [translate_table: standard]	16318.9	0.092	-|1|-	-|1|-	-/CotAD_53249;CotAD_28265/-	Cotton_D_gene_10033390	MALLTFNPLTCLSSSPVRSCSTSLPIVVLPISRLRVNRIDDHCSKCSIGTQFVPSKKRSVMTVKASSASTDGEEQVPAESKKEDLPVGQLPLESKMQQMAEQKMKMKMAKKIRLRRKRLVRKRKLRKKGRWPPSKMKKLKNV	49.01	1e-10	gi|449453131|ref|XP_004144312.1|	PREDICTED: 50S ribosomal protein 5, chloroplastic-like [Cucumis sativus]	-	-	-	-	52	5e-08	B9IHI7	B9IHI7_POPTR Predicted protein OS=Populus trichocarpa GN=POPTRDRAFT_835368 PE=4 SV=1	-	-	-	-	-	-	-	K19034|1|3e-41|137|tcc:TCM_024207|EC[not_get]	-	-	-
217	CotAD_22902	locus=Dt_chr10:1031924:1038906:- [translate_table: standard]	70296.3	0.016	-|-|1	-|-|1	-/-/Cotton_D_gene_10015252	CotAD_22902	MKNKSASVSSRLLAAFGTVVDDGDLHLKRNVIAPYDRRYRWWQTFLVGLVIYSAWASILELTFDKAANGVLLFIDLVVDFFFAIDIILTFFVAYFDTSNFILVDDHLKFAFRYVTRFWLFMDVASTIPFPLINKILIDEWHTGQVFSLLNLLRLWRLYRVGELFKRLEKDIRFSYFWTRLLKLICVTLFAVHSAGCFYYWLAARHKPSEHTWIGRLIGDFKQKGFWHGYICSIYWSIVTLTSVGYGEFYSMNEGEKIFNSIYMLFNMGLIAYIIGNITNLVVQSVVKTFAMRDSINEVMRYASKNQLPEGMREQMLAHMQLKFNTAELQQEEVLKDLPKAIRSSIAQHLFWKTAEKTYLFQGVSDDFLSQLVSEMKAEYFPPRIEIILQNEIPTDFYIL…	66.5	0	gi|359476400|ref|XP_003631831.1|	PREDICTED: potassium channel KAT3-like [Vitis vinifera]	57.87	0	sp|P92960|KAT3_ARATH	Potassium channel KAT3 OS=Arabidopsis thaliana GN=KAT3 PE=1 SV=1	66.5	0	D7SUK4	D7SUK4_VITVI Putative uncharacterized protein OS=Vitis vinifera GN=VIT_04s0008g04510 PE=4 SV=1	-	-	-	-	-	-	-	K04957|1|4e-68|240|sita:101767716|EC[not_get]!K04955|2|2e-16|86.7|mis:MICPUN_56797|EC[not_get]!K05391|3|1e-15|84.0|ath:AT2G46430|EC[not_get]	localization single-organism_process	membrane	transporter_activity
218	Cotton_D_gene_10033625	locus=scaffold4:313217:314014:- [translate_table: standard]	28236.2	0.309	1|2|3	149|199|283	CotAD_25672/CotAD_25672/CotAD_25672	Cotton_D_gene_10033625	MAAATMALSSPSFAGKAVKLSPSAPKIQGNGRVSMRKTATKAAPSGSPWYGPDRVLYLGPLSGEPPSYLTGEFPGDYGWDTAGLSADPETFARNRELEVIHCRWAMLGALGCVFPELLARNGVKFGEAVWFKAGSQIFSEGGLDYLGNPSLIHAQSILAIWACQVILMGAVEGYRIAGGPLGEVTDPLYPGGSFDPLGLADDPEAFAELKVKEIKNGRLAMFSMFGFFVQAIVTGKGPLENLADHLADPVNNNAWAYATNFVPGK	96.6	0	gi|226358409|gb|ACO51067.1|	chloroplast chlorophyll A-B binding protein [Gossypium hirsutum]	93.58	0	sp|P27493|CB22_TOBAC	Chlorophyll a-b binding protein 21, chloroplastic OS=Nicotiana tabacum GN=CAB21 PE=2 SV=1	96.6	0	C1K5D0	C1K5D0_GOSHI Chloroplast chlorophyll A-B binding protein OS=Gossypium hirsutum GN=CBP2 PE=2 SV=1	-	-	-	-	-	-	-	K08912|1|0.0|521|tcc:TCM_029531|EC[not_get]	cellular_process metabolic_process	cell cell_part organelle
219	Cotton_D_gene_10018055	locus=scaffold152:970721:975465:- [translate_table: standard]	62533.2	0.091	3|3|-	6|6|-	-/-/-	Cotton_D_gene_10018055	MAALVAGTPWMRIRVIPEFAPPFIFRRHFRRNFSVRASIDSDAPVRVRFAPSPTGNLHVGGARTALFNYLFARSKGGKFVLRIEDTDLERSTRESEEAVLRDLAWLGLDWDEGPGVGGDYGPYRQSERNAMYKQYAEKLLESGHVYRCFCSNEELEKMKEIAELKKLPPVYSGKWATAADGEVEEELAKGTPYTYRFRVPKEGSLKINDLIRGEVSWKLDTLGDFVIMRSNGQPVYNFCVTVDDATMAISHVIRAEEHLPNTLRQALIYKALGFPMPSFAHVSLILAPDRSKLSKRHGATSVGQYRDMGYLPQAMVNYLALLGWGDGTENEFFTIDQLVEKFSIGRVNKSGAVFDSTKLRWMNGQHLRAIPFEELSQLIGERWKSTGLLTESEGPFVED…	81.98	0	gi|255583454|ref|XP_002532486.1|	glutamyl-tRNA synthetase 1, 2, putative [Ricinus communis]	79.65	0	sp|Q9FEA2|SYE_ARATH	Glutamate--tRNA ligase, chloroplastic/mitochondrial OS=Arabidopsis thaliana GN=At5g64050 PE=1 SV=1	81.98	0	B9T2L7	B9T2L7_RICCO Glutamyl-tRNA synthetase 1, 2, putative OS=Ricinus communis GN=RCOM_0281090 PE=3 SV=1	TP0673	324	6e-104	COG0008	Glutamyl- and glutaminyl-tRNA synthetases	J	Translation, ribosomal structure and biogenesis ;	K01885|1|0.0|1040|tcc:TCM_007599|EC[not_get]	cellular_component_organization_or_biogenesis cellular_process developmental_process metabolic_process reproductive_process single-organism_process	cell cell_part organelle	binding catalytic_activity
220	CotAD_27332	locus=Dt_chr9:56469578:56470597:- [translate_table: standard]	38109.1	0.035	1|1|1	7|2|3	CotAD_19226;Cotton_D_gene_10035028;CotAD_35507/CotAD_19226;Cotton_D_gene_10035028;CotAD_35507/CotAD_19226;Cotton_D_gene_10035028;CotAD_35507	CotAD_27332	MAAHFFTLSIITLSLFVVASSGELESELVADLLTLQSESKSGVIHLDDRTVSKFLTYPRIPRPYSFLIFFDAANFHDKPELRLRELRREFEIVASSFITNHNSSNTKLFFGDIEFRESQSSFQLFGVNSLPHVRLVGPTAKSLKDDSDVMDQGDFSRLAESMAEFVESRTKLTVGPIHRPPVLSKMQLGLITALLLLCLPLVAKRIFAGETLIHDPKIWLSGAVFVYFFSVSGAMHNIIRKMPMFLVDRNDPNKLVFFYQGSGMQLGAEGFAVGFLYTVVGLLLAVVTHVLVYVKDATAKRLAMLFTLLVSFWAVKKVILLDNWKTGYGIHGFWPSSWN	68.98	8e-154	gi|356536045|ref|XP_003536551.1|	PREDICTED: uncharacterized protein LOC100789480 [Glycine max]	70.19	3e-150	sp|Q9SYB5|OST3B_ARATH	-	68.98	1e-152	I1LE85	I1LE85_SOYBN Uncharacterized protein OS=Glycine max GN=Gma.2716 PE=4 SV=1	-	-	-	-	-	-	-	K12669|1|0.0|554|tcc:TCM_030169|EC[not_get]		cell cell_part membrane organelle	transporter_activity
221	CotAD_33744	locus=Dt_chr5:33153601:33161607:- [translate_table: standard]	145215	0.007	-|-|1	-|-|1	-/-/-	CotAD_33744	MAPSRRQSNGRSPLVNQQSQITSFFSKKNSSSPSPSPSPPPPLAKHTSKLNPIPGPKPNPSRSPIPTTPSPGEPKLKKPLLVIGQSLAPTPSSPLNITFGDEVVDKRLRVHWPLDKAWYEGVVKSFDKVSGKHLIQYDDSEEEELDLGKEKIEWVEETTGRFKRLRRGGSLAFKKVVIDDEDDDVADSANEKSDDDDSSDEDWGKNAEKEVSEDADEEDMDLEDEKEEEEELEEEEVGMKISKRKGGGKTESKKRKANGVAKPEFGKKSKTSANGSTKEEFKVPSVEPVKKIETDKASTAADKALVADELERFGKREAEKLHFLGPEVRRDANRKRPGDANYNPKTLYLPPGFLKSLSGCQMGKFYELFEMDAHVGAKELNLQYMRGEQPHCGFPEKNF…	68.62	0	gi|255548475|ref|XP_002515294.1|	ATP binding protein, putative [Ricinus communis]	63.64	0	sp|O04716|MSH6_ARATH	DNA mismatch repair protein MSH6 OS=Arabidopsis thaliana GN=MSH6 PE=1 SV=2	68.62	0	B9RNF5	B9RNF5_RICCO ATP binding protein, putative OS=Ricinus communis GN=RCOM_1347370 PE=3 SV=1	L0277	221	4e-59	COG0249	Mismatch repair ATPase (MutS family)	L	Replication, recombination and repair ;	K08737|1|0.0|1938|tcc:TCM_004795|EC[not_get]			binding
222	Cotton_D_gene_10018053	locus=scaffold152:957782:961495:- [translate_table: standard]	56831.6	0.014	-|1|-	-|2|-	-/CotAD_08977;CotAD_53861/-	Cotton_D_gene_10018053	MDTGGNSLPSGPDGVKRKVSYFYDPEVGNYYYGQGHPMKPHRIRMTHALLAHYGLLQNMQVYKPLPARERDLCRFHADDYVNFLRSITPETQQDQLRQLKRFNVGEDCPVFDGLFSFCQTYAGGSVGGAVKLNHNICDIAINWAGGLHHAKKCEASGFCYVNDIVLAILELLKQHQRVLYVDIDIHHGDGVEEAFYTSDRVMTVSFHKFGDYFPGTGDIRDIGYSKGKYYSLNVPLDDGIDDESYHFLFKPIIGKVMEVFKPGAVVLQCGADSLSGDRLGCFNLSIKGHAECVKFMRSFNVPLLLLGGGGYTIRNVARCWCYETGVALGTEVDDQLPQHEYYEYFGPDYTLHVAPSNMENKNTRQLLEEIRNNLLDNLSKLQHAPSVQFQERPPDTELP…	87.05	0	gi|225428370|ref|XP_002283371.1|	PREDICTED: histone deacetylase 19-like [Vitis vinifera]	80.69	0	sp|O22446|HDA19_ARATH	Histone deacetylase 19 OS=Arabidopsis thaliana GN=HDA19 PE=1 SV=2	87.05	0	F6I0N6	F6I0N6_VITVI Histone deacetylase OS=Vitis vinifera GN=VIT_03s0038g04240 PE=3 SV=1	PAB0764	93.2	3e-20	COG0123	Deacetylases, including yeast histone deacetylase and acetoin utilization protein	BQ	Chromatin structure and dynamics ; Secondary metabolites biosynthesis, transport and catabolism ;	K06067|1|0.0|907|tcc:TCM_007621|EC[not_get]	cellular_component_organization_or_biogenesis cellular_process metabolic_process	cell cell_part organelle	catalytic_activity
223	Cotton_D_gene_10014726	locus=scaffold237:430508:431254:+ [translate_table: standard]	25241.7	0.078	1|-|1	1|-|2	CotAD_02223/-/CotAD_02223	Cotton_D_gene_10014726	MAFADLNLLKPLSKIILFLCLVLIFTSSLGFCKPTLDKDPTPTPWPLQFHSILVMNYSGILQVIDLWYDWPNGRNFNIIQHQLGNVLYDLEWNNGTSFFYTLDSSKTCSSAHVEVGILRPNWLEGATYLGQQHVDGFLCNVWEKVEFIWYFEDVVTKRPVHWVFYTGREAHVMTFEVGAVLEDSKWQAPVYCFHNTTASTDSTSRRLLDGVLKGSTVL	82.17	6e-99	gi|449487375|ref|XP_004157595.1|	PREDICTED: uncharacterized protein At4g14100-like [Cucumis sativus]	76.97	5e-90	sp|Q67YC9|Y4141_ARATH	Uncharacterized protein At4g14100 OS=Arabidopsis thaliana GN=At4g14100 PE=2 SV=1	79.07	3e-96	B9RG20	B9RG20_RICCO Transferase, transferring glycosyl groups, putative OS=Ricinus communis GN=RCOM_1438670 PE=4 SV=1	-	-	-	-	-	-	-	-		cell cell_part organelle	catalytic_activity
224	CotAD_32866	locus=At_chr10:67259980:67265960:- [translate_table: standard]	63283.4	0.068	-|-|2	-|-|2	-/-/-	CotAD_32866	MAAPVPPGAPRPGANSQPPPPRNVNPNYQTNPNSLADNMQNLNLNRPVSMPNSGPRPSPFGQQPPFPQSGGSAGFPGALPPMARPGPPPGMMGRPAVPPTGPPQSALPANVPPGRPLGQPSGHSSPFGSRPPPGSLSSSTGGAVLPSSAFPSSGAPSGGVAPPMPGARPNVFMSSPPLTGPAAPLSRAPAGPLSNGPPAIVSGALPGASQFPLAPSASQPPVGPPLTMMSARAPAQAPTMRSVLGSPAVTSPPVQPMPSASPFSAVPQARPPPPGSPYGPQTWPMQPQQGAQAPPIPGSTQAQPPRMFGMPQPPTNQAMTTIPPAIGQLGAPLSGPSKIDPNQIPRPIPIPSSSPIVYETRQGNSANPPPPATSDYVVRDTGNCSPRYMRCTINQIPCT…	79.18	0	gi|359493759|ref|XP_002279640.2|	PREDICTED: protein transport protein Sec24-like At4g32640-like [Vitis vinifera]	64.29	1e-171	sp|Q9M081|SC24B_ARATH	Protein transport protein Sec24-like At4g32640 OS=Arabidopsis thaliana GN=At4g32640 PE=1 SV=3	79.18	0	E0CT66	E0CT66_VITVI Putative uncharacterized protein OS=Vitis vinifera GN=VIT_19s0014g05310 PE=4 SV=1	ECU02g1460	50.4	8e-06	COG5028	Vesicle coat complex COPII, subunit SEC24/subunit SFB2/subunit SFB3	U	Intracellular trafficking, secretion, and vesicular transport ;	K14007|1|0.0|674|tcc:TCM_035130|EC[not_get]	localization
225	CotAD_71289	locus=Dt_chr6:23744862:23752361:- [translate_table: standard]	148294	0.072	2|-|-	2|-|-	-/-/-	CotAD_71289	MASNPNPQPQSGGGGSGGFDLNKLFKPSSSPMLQHQHLQNVNVTATSPSPTPSPNTSNLTTSPSFPAQSSTPPPPPYLTPSSSYPPPTGPYPFHHYLPYPPPPQPQHPLHPHPNPTGPIPYHPQPQLPTPPTSGNDILMAFFGTQAQSLAPAPVPSAPPLNMTVTPSAPSPSPSPARLLSSKVPKGRHLSGTNLLYDIHVRLPSEVQPQLEVTPITKYASDPGLVLGRQIAVNRNYICYGLKLGNIRILNINTALRSLLRGHTQRVTDMAFFAEDVHLLASASVDGRVFVWRINEGPDDEDKPQIFGKVVIALQIVGQESSKHPRVCWHPHKQEILMVAIGNRILKIDTIKVGKLDGFSAEEPLNFSVDKLIDGVQFVGKHDGEITELSMCQWLTTRIA…	67.83	0	gi|255568504|ref|XP_002525226.1|	nucleotide binding protein, putative [Ricinus communis]	54.38	0	sp|Q9LTT8|VCS_ARATH	Enhancer of mRNA-decapping protein 4 OS=Arabidopsis thaliana GN=VCS PE=1 SV=1	67.83	0	B9SGV7	B9SGV7_RICCO Nucleotide binding protein, putative OS=Ricinus communis GN=RCOM_0820360 PE=4 SV=1	-	-	-	-	-	-	-	K12616|1|0.0|1914|tcc:TCM_030472|EC[not_get]	-	-	-
226	CotAD_37058	locus=At_chr3:43086938:43087414:- [translate_table: standard]	17630.4	0.196	1|1|-	9|10|-	-/-/-	CotAD_37058	MTEANFGWLIRSVHRWSASMMVLMMILHVFRVYLTGGFKKPRELTWVTVVVLGVLTASFGVTGYSLPRDQIGYWAVKIVTGVPEAIPVIGSPLVELLRGSASVGQSTLTRFYSLHTFVLPLLIREVSKWSPELAAAYEVWKAIKFEFDAVDKLDKPAS	98.36	3e-72	gi|372000349|gb|AEX65251.1|	cytochrome b6 [Pereskia sacharosa]	98.36	3e-72	sp|Q68RX7|CYB6_PANGI	Cytochrome b6 OS=Panax ginseng GN=petB PE=3 SV=1	98.36	4e-71	H2BBL3	H2BBL3_9CARY Cytochrome b6 (Fragment) OS=Pereskia sacharosa GN=petB PE=4 SV=1	NMA0384	89.7	4e-21	COG1290	Cytochrome b subunit of the bc complex	C	Energy production and conversion ;	K02635|1|3e-72|219|tcc:ThcaC_p051|EC[not_get]	cellular_process localization metabolic_process single-organism_process	cell cell_part membrane membrane_part organelle organelle_part	binding catalytic_activity electron_carrier_activity
227	CotAD_54165	locus=Dt_chr11:53999567:54000130:+ [translate_table: standard]	17470.9	0.365	1|1|1	2|2|2	Cotton_D_gene_10015664/Cotton_D_gene_10015664/Cotton_D_gene_10015664	CotAD_54165	MGVVTYEFEVTSLVAPTRLFKAFVLEGAKVYPKAAPHAIKSVELEGDGKPGSIVKINFVEGLPFQYMKHMIGGHDESNLSYSYSLIEGGPLGDKLEKISYENQFVADASGGSVCKSSIKFYTIGDYVITEDEIKALIQRSEVVYKAIEAYLLANTDACN	83.65	7e-97	gi|15811629|gb|AAL09033.1|AF416652_1	ribonuclease-like PR-10 [Gossypium arboreum]	51.25	3e-52	sp|P43179|BEV1F_BETPN	Major pollen allergen Bet v 1-F/I OS=Betula pendula GN=BETV1F PE=1 SV=2	83.65	9e-96	Q945E7	Q945E7_GOSAR Ribonuclease-like PR-10 OS=Gossypium arboreum PE=2 SV=1	-	-	-	-	-	-	-	K02553|1|7e-10|59.7|bvg:104906773|EC[not_get]	response_to_stimulus
228	CotAD_29445	locus=scaffold743.1:339379:342015:+ [translate_table: standard]	24959.5	0.124	-|-|1	-|-|1	-/-/-	CotAD_29445	MAAPAVEGVAVTARVRVVAVSKTKPVSLIRQIYDAGHRCFGENYVQEFVQKAPQLPEDIEWHFIGHLQSNKVKTLLGGVPNLAFFEGVDNEKIANHLDRAVSSLGRNPLKIFVQVNTSGEPSKSGIDPSGCVRLAEHVKSHCPHLEFSGLMTIGMPDYTSTPENFRTLSKCRVEVCKALGMTEDQCELSMGMSGDFEQAIEMGSTNVRIGSTIFGPRDYSKKQPN	84.88	3e-132	gi|462407785|gb|EMJ13119.1|	hypothetical protein PRUPE_ppa010565mg [Prunus persica]	52.83	3e-65	sp|Q9Z2Y8|PROSC_MOUSE	Proline synthase co-transcribed bacterial homolog protein OS=Mus musculus GN=Prosc PE=1 SV=1	84.88	1e-130	B9STY6	B9STY6_RICCO Proline synthetase associated protein, putative OS=Ricinus communis GN=RCOM_0752450 PE=3 SV=1	PA0394	122	1e-33	COG0325	Predicted enzyme with a TIM-barrel fold	R	General function prediction only ;	K06997|1|1e-136|386|tcc:TCM_030828|EC[not_get]	-	-	-
229	Cotton_D_gene_10035584	locus=scaffold5:811890:814424:+ [translate_table: standard]	53977.2	0.017	1|-|-	1|-|-	CotAD_16982/-/-	Cotton_D_gene_10035584	MAEHVHADHAIHGCFSKVDVGRLRGFVSTTTIFVFFFFLLAIAALLNWMNFPIIGGTPPPPPPPLSSEIRHEKVEFPLNCSNLVNHTTVFEPKESSTNKTCPDYFRWIHQDLKQWKSSGITKDMIERGKPIADFRLVIVNGEAYVERYIRSFQTRDLFTIWGILQLLRLYPGKVPDLDLFFYCGDNTVIMKSDYKGRYAALAPPVFHYCGEEAALDIVFPDWSFWGWVEVNIKPWEEQLRAIKKERERIKWEKREPYAYWKGNPTSPDRGDLLNCNVSDKHDWNARLYVQDWAKEIQEGFKHSKLEDQCTHSMMPMQHFWPISNENKCRDLKFAVEWGNNHTHKAEAIGKAGSKFIEEALTMQNVYDYMFHLLNEYSKLLKFKPTIPPNARRLCSETTE…	53.5	6e-163	gi|255541542|ref|XP_002511835.1|	KDEL motif-containing protein 1 precursor, putative [Ricinus communis]	-	-	-	-	53.5	8e-162	B9RDP6	B9RDP6_RICCO KDEL motif-containing protein 1, putative OS=Ricinus communis GN=RCOM_1614780 PE=4 SV=1	-	-	-	-	-	-	-	K13667|1|0.0|531|tcc:TCM_005367|EC[not_get]	-	-	-
230	Cotton_D_gene_10031202	locus=scaffold70:772761:775805:- [translate_table: standard]	27241.5	0.109	-|2|-	-|3|-	-/CotAD_00869/-	Cotton_D_gene_10031202	MSKEEMKIGRRFEGKVAIVTASTQGIGFSIAERLGLEGAAVVVSSRKQKNVDEAVEKLKNKGIQVLGVVCQVSNAQQRKDLINKTVEKYGKIDVVVSNAAANPTVSLLLETPESVLDKVWEINVKASVLLLQEAAPYLQKGSSVVLISSIMGYHPQIAMAMYGITKTALLGLTKALAKEMAPDTRVNCVAPGLVPTNFAAFLTKDEVLRKTAEESTLLGKLGTPGDMAAAASFLASDDASYITGETLVVAGGAPSRL	79.6	3e-121	gi|380039554|gb|AFD32321.1|	tropinone reductase-like 3 [Erythroxylum coca]	51.63	4e-61	sp|Q5RCF8|DHRS4_PONAB	Dehydrogenase/reductase SDR family member 4 OS=Pongo abelii GN=DHRS4 PE=2 SV=3	79.6	4e-120	H9BFQ2	H9BFQ2_ERYCB Tropinone reductase-like 3 OS=Erythroxylum coca PE=2 SV=1	fabG	115	2e-30	COG1028	Dehydrogenases with different specificities (related to short-chain alcohol dehydrogenases)	IQR	Lipid transport and metabolism ; Secondary metabolites biosynthesis, transport and catabolism ; General function prediction only ;	K11147|1|6e-133|378|tcc:TCM_030334|EC[not_get]	metabolic_process		catalytic_activity
231	Cotton_D_gene_10005821	locus=scaffold230:487037:489517:+ [translate_table: standard]	57490.4	0.118	3|2|1	9|11|10	CotAD_36901;CotAD_41461/CotAD_36901;CotAD_41461/CotAD_36901;CotAD_41461	Cotton_D_gene_10005821	MSLRPSTRTEVRRNRYKVAVDAEEGRRRREDNMVEIRKSKREESLQKKRREGLQAQQLSASLQSSNVEKKLESLPSMVAGVWSSNGSAQLEATTQFRKLLSIERSPPIDEVIQSGVVPRFVEFLMREDYPQLQFEAAWALTNIASGTSEHTKVVIDHGAVPIFVKLLGSPSDDVREQAVWALGNVAGDSPRCRDLVLSHGALMPLLAQLNEHSKLSMLRNATWTLSNFCRGKPQPPFDQVRPALPALERLIHSNDEEVLTDACWALSYLSDGTNDKIQAVIEAGVCPRLVELLLNPSPSVLIPALRTCIIDHGALSCLLSLLTHNHKKSIKKEACWTISNITAGNKEQIQAVINAGIIGPLVSLLQNAEFDIKKEAAWAISNATSGGTHEQIKYLVSEG…	86.96	0	gi|225431871|ref|XP_002275593.1|	PREDICTED: importin subunit alpha-1 [Vitis vinifera]	79.51	0	sp|Q96321|IMA1_ARATH	Importin subunit alpha-1 OS=Arabidopsis thaliana GN=KAP1 PE=1 SV=2	86.96	0	D7SY66	D7SY66_VITVI Importin subunit alpha OS=Vitis vinifera GN=VIT_05s0077g01430 PE=3 SV=1	ECU11g1760	224	2e-66	COG5064	Karyopherin (importin) alpha	U	Intracellular trafficking, secretion, and vesicular transport ;	K10590|1|9e-15|81.3|csl:COCSUDRAFT_67182|EC[not_get]	localization single-organism_process	cell cell_part organelle organelle_part	transporter_activity
232	CotAD_11086	locus=At_chr6:2071311:2073459:- [translate_table: standard]	31063.1	0.025	-|-|1	-|-|1	-/-/CotAD_11078;Cotton_D_gene_10022281;CotAD_41152	CotAD_11086	MMSGGYTSIDNQKVSGSVPAVSDPSHVAVKFTDSNLQTFPPSGAQGKISGGTQPPHDADDTFSKPAGGSQPGSGEPQGSGWFRTFTIAAYKPYFDVDTSDIIDRLKESLFPFRGTFTEKTATNPDLYGPFWICTTLIFVAASIGTFVTYIAHKLKKKEWDYDINLVTWSAGVFYGYVTVVPLILYVILKYFSAPSGLVQLFCLYGYSLFVFIPALCLSVVPLEIFRWVIAGVAGFMSATFVALNLKAHINSAGERWFLIVTGIFLLQLALAVVLKLYLFTVTV	84.51	4e-162	gi|30690667|ref|NP_198101.2|	Yip1 integral membrane domain-containing protein [Arabidopsis thaliana]	37.89	1e-34	sp|Q54TS4|YIPF1_DICDI	Protein YIPF1 homolog OS=Dictyostelium discoideum GN=yipf1 PE=3 SV=1	84.51	5e-161	F4K4B8	F4K4B8_ARATH Yip1 integral membrane domain-containing protein OS=Arabidopsis thaliana GN=At5g27490 PE=4 SV=1	-	-	-	-	-	-	-	-		cell cell_part
233	CotAD_43255	locus=Dt_chr5:11523705:11527619:+ [translate_table: standard]	34744.2	0.239	1|2|2	1|3|4	Cotton_D_gene_10029636/Cotton_D_gene_10029636/Cotton_D_gene_10029636	CotAD_43255	MAGLVPPGTSSDACKPAHSKADEKTDYMNLPCPIPYEELHREALMSLKPETFEGLRFDFTKGLNQKFSLSHSVFMGPTEIPSQSAETIKIPTAHYEFGANFIDPNLMLIGRVLTDGRLNARLKWDLSDNFTVKANAQLSNEPHMSHGMFNFDYKGKDFRSQFQMGNGALFGASYIQSITQHLSLGGEVFWAGQHRKSGIGYAARYETDKMVATGQVANTGIVALSYVQKVSDKVSLATDLMYNYMSRDVTASVGYDYILRQCRLRGKIDSNGCTTSYLEERLNMGLNFILSAEIDHRKKDYKFGFGLTVG	83.97	0	gi|255544135|ref|XP_002513130.1|	mitochondrial import receptor subunit tom40, putative [Ricinus communis]	74.92	4e-178	sp|Q9LHE5|TO401_ARATH	Mitochondrial import receptor subunit TOM40 homolog 1 OS=Arabidopsis thaliana GN=TOM40-1 PE=1 SV=3	83.97	0	B9RGH8	B9RGH8_RICCO Mitochondrial import receptor subunit tom40, putative OS=Ricinus communis GN=RCOM_1454110 PE=4 SV=1	-	-	-	-	-	-	-	K11518|1|0.0|603|tcc:TCM_007667|EC[not_get]	biological_regulation localization regulation_of_biological_process single-organism_process	cell cell_part membrane organelle organelle_part	molecular_transducer_activity transporter_activity
234	CotAD_24837	locus=scaffold783.1:567154:573500:+ [translate_table: standard]	94556.1	0.274	2|2|2	5|7|4	Cotton_D_gene_10018001/Cotton_D_gene_10018001/Cotton_D_gene_10018001	CotAD_24837	MSDQKNDAGTSQANAPANDPKKKEDQKKKDDEDLSEEDLALKQQLELYVERVQDSDPGLQKVALESMRHEIRTSTSSMTSVPKPLKFLRPHYGTLKAFYETMPESDLKKYLADILSVLALTMSAEGERESLKYRLLGSEGDIGSWGHEYVRNLAGEIAQEYGKRQSEEAAIEDLMELVQQIVSFHMKHNAEPEAVDLLMEVEDLDLLIEHVDKTNFKRTCLYLTSSARYLPGPDDMLVLDIAYTIYLKFEEFASALQIALSLDNMQYVLFQHVRQVFRSCDNQLKKMQFCYILARHGITFELDDDMVADDDERETLQDIINNTKLSESYLTLARDIEVMEPKSPEDIYKAHLLDGRASAGASVDSARQNLAATFVNAFVNAGFGQDKLMTAPADSSIGG…	85.43	0	gi|462394223|gb|EMJ00127.1|	hypothetical protein PRUPE_ppa001162mg [Prunus persica]	81.41	0	sp|Q9SIV2|RPN1A_ARATH	26S proteasome non-ATPase regulatory subunit 2 1A OS=Arabidopsis thaliana GN=RPN1A PE=1 SV=2	85.76	0	I1LS70	I1LS70_SOYBN Uncharacterized protein OS=Glycine max GN=Gma.1623 PE=4 SV=1	ECU02g0480	51.2	7e-06	COG5116	26S proteasome regulatory complex component	O	Posttranslational modification, protein turnover, chaperones ;	K03028|1|0.0|1402|tcc:TCM_008190|EC[not_get]	biological_regulation metabolic_process regulation_of_biological_process	macromolecular_complex
235	CotAD_38159	locus=Dt_chr11:1266155:1267941:- [translate_table: standard]	33275.7	0.507	2|2|2	12|14|14	CotAD_65398;Cotton_D_gene_10006746;CotAD_38658;Cotton_D_gene_10008776/CotAD_65398;Cotton_D_gene_10006746;CotAD_38658;Cotton_D_gene_10008776/CotAD_65398;Cotton_D_gene_10006746;CotAD_38658;Cotton_D_gene_10008776	CotAD_38159	MATATVPAAARQLSPKEADIQMMLAAEVHLGTKNCDFQMERYVFKRRNDGIYIINLGKTWEKLQLAARVIVAIENPQDIIVQSARPYGQRAVLKFAQYTGCHAIAGRHTPGTFTNQLQTSFSEPRLLILTDPRTDHQPIKEAALGNIPTIAFCDTDSPMRYVDIGIPANNKGKHSIGCLFWLLARMVLQMRGTIAPGQKWDVMVDLFFYREPEEAKQQEEEEAIAAPDYGMVSLATDQWPAQIGDQWSADMVQPPISGVPAGNWGDQVAVAVTSDVWDAAAAPAQIPGAPVDVSAPAATGWE	85.33	4e-152	gi|255578243|ref|XP_002529989.1|	40S ribosomal protein sa, putative [Ricinus communis]	76.34	3e-149	sp|A5BUU4|RSSA_VITVI	40S ribosomal protein SA OS=Vitis vinifera GN=GSVIVT00034021001 PE=3 SV=1	85.33	6e-151	B9SVH0	B9SVH0_RICCO 40S ribosomal protein sa, putative OS=Ricinus communis GN=RCOM_1264680 PE=3 SV=1	MYPU_5330	62	2e-10	COG0052	Ribosomal protein S2	J	Translation, ribosomal structure and biogenesis ;	K02998|1|6e-172|481|tcc:TCM_029221|EC[not_get]	metabolic_process	cell cell_part macromolecular_complex	structural_molecule_activity
236	Cotton_D_gene_10014249	locus=scaffold144:1369884:1374201:+ [translate_table: standard]	48609.8	0.027	-|1|-	-|1|-	-/-/-	Cotton_D_gene_10014249	MAAAEAATISSDSLATVSNGPVLSFINKRLRALRKKYNRILQMEESVSQGKTLNKEQDDVLRSKPTVSALIDELEKLRQPLSSAVSEEISLALQRQTVSSSETTSQAQPDKTEPQEQLPNVPDHAIEDLLNLLYFGSLFDVKSQSDFTSTMLTRTHERGCCLTYDYVTDDATDLLNEKDLDLISTLSGLLTSRPADSSLSHKNALHRCIQHAMLWLSNSDQPVDPNADVSYAGLRERLNKIMALDYFTTTPEIKDPAEVAAAAGTYTSFQVPVHAVPISVPVQVEDSVGQYQQKAEDASNYQETETGDNQFSTTEELQKDPALQDNLEKENQAEDITVQEEEHGKLQVDNGESKEQQYVPRRPYQNQRGGRRGYFVGRGGRSSGRGGVSYQNGHNQYYD…	64.46	4e-146	gi|225424881|ref|XP_002269144.1|	PREDICTED: uncharacterized protein LOC100248339 [Vitis vinifera]	-	-	-	-	64.46	5e-145	F6HPG1	F6HPG1_VITVI Putative uncharacterized protein OS=Vitis vinifera GN=VIT_01s0026g01470 PE=4 SV=1	-	-	-	-	-	-	-	-	-	-	-
237	Cotton_D_gene_10014511	locus=scaffold324:226728:234532:- [translate_table: standard]	63138.5	0.098	1|-|-	1|-|-	CotAD_36244/-/-	Cotton_D_gene_10014511	MSLCGSVSALYLNLQSSKISMGSVLAFRSGESMGNTLRIPFKKRSSKGAACPLQVVCIDYPRPELENTVNFLEAASLSASFRSASRPAKPLKVIIAGAGLAGLSTAKYLADAGHKPILLEARDVLGGKVAAWKDDDGDWYETGLHIFFGAYPNVQNLFGELGINDRLQWKEHSMIFAMPNKPGEFSRFDFPEVLPAPLNGIWAILKNNEMLTWPEKVKFAIGLLPAMLGGQPYVEAQDGLSVKDWMRKQGVPDRVTEEVFIAMSKALNFINPDELSMQCILIALNRFLQEKHGSKMAFLDGNPPERLCMPIVNHIDSLGGEVRLNSRIKKIELNEDGTVKSFLLNNGNTIEGDAYVVATPVDIFKLLLPEDWREISYFKKLEKLVGVPVINVHIWFDRK…	82.53	0	gi|224460417|gb|ABG77271.2|	phytoene desaturase [Carica papaya]	83.1	0	sp|Q07356|PDS_ARATH	15-cis-phytoene desaturase, chloroplastic/chromoplastic OS=Arabidopsis thaliana GN=PDS PE=1 SV=1	82.53	0	Q0PQZ4	Q0PQZ4_CARPA Phytoene desaturase OS=Carica papaya GN=pds PE=2 SV=2	NMA1338	58.5	1e-08	COG2907	Predicted NAD/FAD-binding protein	R	General function prediction only ;	K02293|1|0.0|1060|tcc:TCM_020173|EC[not_get]	cellular_process metabolic_process single-organism_process	cell cell_part organelle	catalytic_activity
238	Cotton_D_gene_10030082	locus=scaffold98:1365721:1372040:- [translate_table: standard]	93446.4	0.107	2|1|1	2|1|2	-/CotAD_12042/-	Cotton_D_gene_10030082	MGKSSKKSTPKVEAAPAVASPKSGKKGKREAQETLEKQVTVKKQKKNDGVAQAIVKKKVEAKTQKKKKDETSSSSDDSSDSEDEPVPLKKQAATTKSGSVPAKKAKQASSLKSSESSSEEDSSSDEEAPQNKKPVVSKNGPVPAAKTVKADSGSESSSEEDSSSDEEAPAKKKNPVVAKKGSVPAAKTLKADSSSSSSEEDSSSDEEAPAQNKKPVPAKPGSIPAAKTVKADSSSESSSEEDSSSDEEAPAQNKKSVATKSVSVPDAKTVKADSSSESSSEEGSSSDEEASVQKKKPVVAKSGSIPVAKTVKADSSSESSSEEDSSSDEERVAKTKVVTAVKNDSAPAKKGESSSSSDASDEDSSSDENEEKSKPATKKGPTTVPKKGTSESSESDISS…	67.69	5e-94	gi|297737935|emb|CBI27136.3|	unnamed protein product [Vitis vinifera]	64.71	2e-77	sp|Q7XTT4|NUCL2_ORYSJ	Nucleolin 2 OS=Oryza sativa subsp. japonica GN=Os04g0620700 PE=2 SV=2	67.54	2e-92	F6HF46	F6HF46_VITVI Putative uncharacterized protein OS=Vitis vinifera GN=VIT_01s0011g02180 PE=4 SV=1	sll0517	47.4	5e-06	COG0724	RNA-binding proteins (RRM domain)	R	General function prediction only ;	K11294|1|2e-133|419|tcc:TCM_007740|EC[not_get]	-	-	-
239	CotAD_16946	locus=At_chr2:8506386:8507329:+ [translate_table: standard]	28444.9	0.196	4|3|3	10|8|10	CotAD_28784;Cotton_D_gene_10003666/CotAD_28784;Cotton_D_gene_10003666/CotAD_28784;Cotton_D_gene_10003666	CotAD_16946	MLAIFHKAFANPPEELNSPASHKSTKKPKQPEETLNDFLSHHPHNTFSMSFGNAAVLAYVRHERAASVHQRLFCGFDDIYCLFLGSLNNLFMLNRQYGLSKGSNEAMFVIEAYRTLRDRGPYPADQVVKDLEGSFAFVIYDSKTGTVFAALGSDGGVKLYWGIAADGSVVISDDLDVIKEGCAKSFAPFPTGFMFHSEGGLMSFEHPMNKIRAMPRVDSEGVICGANFKVDVYSRVNSIPRVGSATNWTDHWDSH	84.31	3e-162	gi|284521002|gb|ADB93076.1|	stem-specific protein tsjt1, putative [Jatropha curcas]	42	2e-35	sp|P24805|TSJT1_TOBAC	Stem-specific protein TSJT1 OS=Nicotiana tabacum GN=TSJT1 PE=2 SV=1	84.31	3e-161	D6BRF0	D6BRF0_9ROSI Stem-specific protein tsjt1, putative OS=Jatropha curcas PE=2 SV=1	-	-	-	-	-	-	-	K01953|1|7e-09|59.3|obr:102715470|EC[not_get]		cell cell_part membrane organelle
240	CotAD_10158	locus=At_chr7:7541340:7542589:- [translate_table: standard]	19488.7	0.046	1|1|-	4|8|-	CotAD_05454;Cotton_D_gene_10032719/CotAD_05454;Cotton_D_gene_10032719/-	CotAD_10158	MERSKAMMMAVAAVGLALVLMVPQADATRYIVGGGGIGWTTNVNYTVWARGKHFYNGDWLYFVYDRNQMNVLEVNKTDYESCNADHPLHNWTTGAGRDVVPLNVTRHYYFISGKGFCYGGMKLAVRVENPPPPPKAAPLNEKSGSSPSSIVYRGQLVLPAAFAIAALWDTFVRIW	100	7e-107	gi|319433443|gb|ADV57639.1|	copper binding protein 4 [Gossypium hirsutum]	58.44	6e-54	sp|Q39131|LAML_ARATH	Lamin-like protein OS=Arabidopsis thaliana GN=At5g15350 PE=1 SV=1	100	9e-106	F4YAW3	F4YAW3_GOSHI Copper binding protein 4 OS=Gossypium hirsutum GN=BCP4 PE=2 SV=1	-	-	-	-	-	-	-	-			binding
241	Cotton_D_gene_10009622	locus=scaffold239:415764:416201:+ [translate_table: standard]	16072	0.29	4|-|4	38|-|42	CotAD_76046/-/CotAD_76046	Cotton_D_gene_10009622	MGVVIIDGSTVRAFVTDDQQFTKSVDERFAALDLNNDGVLSRSELRKAFESLRLLESHFGVDVATPPDELTQLYNSIFERFDCDGSGTVDLQEFRSEMKKILLAIADGLGSCPIQMVLEDDDQSFLKKAADLEAAKLDPNHAQAS	81.6	9e-72	gi|297824439|ref|XP_002880102.1|	calcium-binding EF hand family protein [Arabidopsis lyrata subsp. lyrata]	-	-	-	-	81.6	1e-70	D7LKY8	D7LKY8_ARALL Calcium-binding EF hand family protein OS=Arabidopsis lyrata subsp. lyrata GN=ARALYDRAFT_903848 PE=4 SV=1	-	-	-	-	-	-	-	-			binding
242	Cotton_D_gene_10035405	locus=scaffold19:3968456:3970486:- [translate_table: standard]	29677.9	0.401	1|-|1	9|-|10	CotAD_09132/-/CotAD_09132	Cotton_D_gene_10035405	MSPTESSREENVYMAKLAEQAERYEEMVEFMEKVAKTVDVEELTVEERNLLSVAYKNVIGARRASWRIISSIEQKEESRGNEDHVAQLKEYRGKIEAELSKICDGILSLLESHLIPLASSAESKVFYLKMKGDYHRYLAEFKTGAERKEAAESTLLAYKSAQDIALAELAPTHPIRLGLALNFSVFYYEILNSPDRACNLAKQAFDEAISELDTLGEESYKDSTLIMQLLRDNLTLWTSDITDEAGDEIKEASKHESGEGQQ	100	0	gi|164652942|gb|ABY65004.1|	14-3-3e protein [Gossypium hirsutum]	91.51	2e-175	sp|Q9SP07|1433_LILLO	14-3-3-like protein OS=Lilium longiflorum PE=2 SV=1	100	0	B6RF02	B6RF02_GOSHI 14-3-3e protein OS=Gossypium hirsutum PE=2 SV=1	ECU03g1010	214	5e-69	COG5040	14-3-3 family protein	T	Signal transduction mechanisms ;	K06630|1|0.0|517|jcu:105638710|EC[not_get]			binding
243	CotAD_18638	locus=scaffold71.1:1375716:1376144:- [translate_table: standard]	16049.7	0.563	1|1|1	2|5|2	CotAD_45010/CotAD_45010/CotAD_45010	CotAD_18638	MGRVRTKTVKKSSRQVIERYYSRMTLDFHTNKKIIEEVAIIPSKRLRNKIAGFSTHLMKRIQKGPVRGISLKLQEEERERRMDFVPDESAIKVDQIEVDKETLDMLSVLGMGDIPGLVKVDPVAVSVPQVGFGRGGGPGRRF	91.47	3e-82	gi|255578977|ref|XP_002530341.1|	40S ribosomal protein S17, putative [Ricinus communis]	88.37	5e-78	sp|P49215|RS17_SOLLC	40S ribosomal protein S17 OS=Solanum lycopersicum GN=RPS17 PE=2 SV=3	91.47	4e-81	B9SWH2	B9SWH2_RICCO 40S ribosomal protein S17, putative OS=Ricinus communis GN=RCOM_0293410 PE=3 SV=1	MA4472	46.6	3e-07	COG1383	Ribosomal protein S17E	J	Translation, ribosomal structure and biogenesis ;	K02962|1|4e-88|255|tcc:TCM_016959|EC[not_get]	metabolic_process	cell cell_part macromolecular_complex	structural_molecule_activity
244	CotAD_11057	locus=At_chr6:2311743:2315030:- [translate_table: standard]	58880.1	0.115	2|1|2	9|7|8	Cotton_D_gene_10022299;CotAD_41169/Cotton_D_gene_10022299;CotAD_41169/Cotton_D_gene_10022299;CotAD_41169	CotAD_11057	MSLRPNSRTEVRRNRYKVAVDAEEGRRRREDNMVEIRKNRREESLQKKRREGLQAQPMPASLHSSAVEKKLENLPAMVAGVWADDSNMQLEATSQFRKLLSIERSPPIDQVIQAGVVPRFIEFLARDDFPQLQFEAAWALTNIASGTSENTKVVIDHGAVPIFVKLLASPSDDVREQAVWALGNVAGDSPRCRDLVLSHGALLPLLAQLNEHVKLSMLRNATWTLSNFCRGKPQPPFDLVKPALPALTHLIHSNDEEVLTDACWALSYLSDGTNDKIQAVIEAGVCGRLVELLMHPSPSVLIPALRTVGNIVTGDDGQTQCIINHQVLPCLLNLLTNNFKKSIKKEACWTISNITAGNKEQIQAVIEANIISPLVHLLQNAEFDIKKEAAWAISNATSG…	91.9	0	gi|255542844|ref|XP_002512485.1|	importin alpha, putative [Ricinus communis]	82.14	0	sp|Q96321|IMA1_ARATH	Importin subunit alpha-1 OS=Arabidopsis thaliana GN=KAP1 PE=1 SV=2	91.9	0	B9RFG6	B9RFG6_RICCO Importin subunit alpha OS=Ricinus communis GN=RCOM_1434500 PE=3 SV=1	ECU11g1760	253	3e-77	COG5064	Karyopherin (importin) alpha	U	Intracellular trafficking, secretion, and vesicular transport ;	K10590|1|2e-17|89.7|csl:COCSUDRAFT_67182|EC[not_get]	localization single-organism_process	cell cell_part organelle organelle_part	transporter_activity
245	CotAD_75276	locus=At_chr13:50450885:50451607:+ [translate_table: standard]	27856	0.033	-|-|1	-|-|2	-/-/CotAD_35649;CotAD_08568;CotAD_08571;Cotton_D_gene_10031926;CotAD_15724;CotAD_76121	CotAD_75276	MNRVQYPNTDNNHPLLSENPHILVPFLEYGLYIDSQVPNFTTFTSPRLFATHLPLVSLPESATNSSCKLVYLCRNPKDTFVSLWHFTNKLRTKDMGSNSLEVTFDKFIRGVSLYGPFWDHVLGYWKESLENPERVLFLKYEEMKEQPKLQLMKLAQFLGCPFSNEEETRGAVDGIQKLCSFENLSNLDVNKTGKLASGEEYKAFFRRGEVGDAKNHLTPQMIQKLDQITEQKLHGYGLKF	70	4e-123	gi|225466219|ref|XP_002267209.1|	PREDICTED: flavonol sulfotransferase-like [Vitis vinifera]	56.43	4e-97	sp|Q9M1V2|SOT5_ARATH	Cytosolic sulfotransferase 5 OS=Arabidopsis thaliana GN=SOT5 PE=1 SV=1	70	6e-120	F6HFY6	F6HFY6_VITVI Putative uncharacterized protein OS=Vitis vinifera GN=VIT_04s0079g00220 PE=4 SV=1	-	-	-	-	-	-	-	K01025|1|2e-118|343|jcu:105630588|EC[not_get]			catalytic_activity
246	CotAD_17058	locus=At_chr7:9110526:9112172:- [translate_table: standard]	43287.8	0.026	-|1|-	-|1|-	-/Cotton_D_gene_10035653;CotAD_21735/-	CotAD_17058	MPLSLPKIIVHFRHVLVVLSVGMAMLSTCLTQDSKCEFKAIFNFGDSNSDTGGFWAAFPAQSGPFGMTFFHKPSGRATDGRLILDFLAQALGMPFISPYLQSIGSDYRHGVNFATLASTVLLPNTSLFVTGISPFSLAIQLNQMKEFKAKVVEYHSGNTKGSTQLPSPDIFGKSIYTFYIGQNDFTSNLKAIGIEGVKQYLLQVVSQIAATVKELFGLGGRTFFVLNLAPVGCYPALLVQLPHETSDLDKFGCLISYNKAVVDYNNMLKEALSQTRRELPNASLIYVDTHAVLLQLFQDPTSHGLRYGTKACCGYGGGNYNFHPEVYCGNTKVMNGTKVTASACKDPNNYVSWDGIHATEAANKLTTLAILNGSYFDPPFPLHKLCYLHPVG	80.73	0	gi|224130466|ref|XP_002320844.1|	predicted protein [Populus trichocarpa]	70.34	0	sp|Q9M153|GDL61_ARATH	GDSL esterase/lipase At4g01130 OS=Arabidopsis thaliana GN=At4g01130 PE=2 SV=1	80.73	0	B9I8T7	B9I8T7_POPTR Predicted protein OS=Populus trichocarpa GN=POPTRDRAFT_807357 PE=4 SV=1	-	-	-	-	-	-	-	K01206|1|8e-107|322|cic:CICLE_v10031741mg|EC[not_get]	metabolic_process		catalytic_activity
247	CotAD_04172	locus=Dt_chr5:13545674:13549230:- [translate_table: standard]	39062	0.192	1|2|2	2|6|8	CotAD_14687/CotAD_14687/CotAD_14687	CotAD_04172	MEGIAFSPSNNFHCYPQIHPIKTLTPIPFRFCNYKTNNPNQSLLSFSINSSKTSQTPITQPPPLVVVGSANADIYVEIDRLPTEGESISAKNGQTLAGGKGANQATCGAKLSYPTYFVGQVGDDAHGKLITQALGNGGVRLEYLKSLGGGVPTGHAVVMLQSNGQNSIIIVGGANMSSWPDKLSDQDLDVVKNAGIVLLQREIPDSVNIQVAKAAKGAGVTVIMDAGGMDAPMPQELLKFVDIFSPNESELGRLTGMPTDNFEQISQAAAKCHKMGVKQVLVKLGAKGSALFIEGEEPITQPIIPAAQVVDTTGAGDTFTASFAVALVEGKSKRESLNFAAAAASLCVQVKGAIPSMPDRKSVLNLLQSL	74.27	0	gi|224117100|ref|XP_002317476.1|	predicted protein [Populus trichocarpa]	33.33	2e-41	sp|P44331|RBSK_HAEIN	Ribokinase OS=Haemophilus influenzae (strain ATCC 51907 / DSM 11121 / KW20 / Rd) GN=rbsK PE=3 SV=1	74.27	0	B9HZQ1	B9HZQ1_POPTR Predicted protein OS=Populus trichocarpa GN=POPTRDRAFT_1094210 PE=3 SV=1	Cgl2273	120	7e-31	COG0524	Sugar kinases, ribokinase family	G	Carbohydrate transport and metabolism ;	K00852|1|0.0|619|tcc:TCM_032360|EC[not_get]	cellular_process metabolic_process single-organism_process		catalytic_activity
248	Cotton_D_gene_10017746	locus=scaffold167:370621:374190:- [translate_table: standard]	73682.1	0.552	-|3|3	-|25|23	-/-/-	Cotton_D_gene_10017746	MAGSWRARGSLVVLAIVLFGCLFAISIAKEEATKLGTVIGIDLGTTYSCVGVYKNGHVEIIANDQGNRITPSWVAFTDSERLIGEAAKNQAAVNAERTIFDVKRLIGRKFDDKEVQKDMKLVPYKIVNKDGKPYIQVKIKDGETKVFSPEEISAMVLTKMKETAEAFLGKKIKDAVVTVPAYFNDAQRQATKDAGVIAGLNVARIINEPTAAAIAYGLDKKGGEKNILVFDLGGGTFDVSILTIDNGVFEVLSTNGDTHLGGEDFDHRVMEYFIKLIKKKHGKDISKDNKALGKLRREAERAKRALSSQHQVRVEIESLFDGIDFSEPLTRARFEELNNDLFRKTMGPVKKAMEDAGLEKRQIDEIVLVGGSTRIPKVQQLLKDYFDGKEPNKGVNPDE…	96.25	0	gi|211906506|gb|ACJ11746.1|	luminal binding protein [Gossypium hirsutum]	93.71	0	sp|Q03685|BIP5_TOBAC	Luminal-binding protein 5 OS=Nicotiana tabacum GN=BIP5 PE=2 SV=1	96.25	0	D2D326	D2D326_GOSHI Luminal binding protein OS=Gossypium hirsutum PE=2 SV=1	YPO0468	584	0	COG0443	Molecular chaperone	O	Posttranslational modification, protein turnover, chaperones ;	K09490|1|0.0|1227|tcc:TCM_016516|EC[not_get]	metabolic_process response_to_stimulus	cell cell_part organelle organelle_part	binding catalytic_activity
249	Cotton_D_gene_10038833	locus=scaffold35:2665672:2667925:- [translate_table: standard]	56879.7	0.014	-|1|-	-|1|-	-/CotAD_55797;CotAD_19558;CotAD_07531;Cotton_D_gene_10005420;CotAD_36066/-	Cotton_D_gene_10038833	MKVFPRPNHGNKGMVSRNGGVRCEAAEFNAALRPQKIDLSKASALSALQQLKTSAADRYTKERSSIVVIGLSVHTAPVEMREKLAIPEAEMPRAIGELCGLNHIEEAAVLSTCNRMEIYVVALSQHRGVKEVTEWMSKTSGIPVSEICEHRFLLYNKDATQHLFEVSAGLDSLVLGEGQILAQVRQVVKAGEGVLGFGRNISGLFKHAITVGKRVRTETNIAAGAVSVSSAAVELAFMKLPESSHTTARMLVVGAGKMGKLVIKHLVAKGCTKMVVVNRSEEKVAAIREEMKGVEIIYRPFTDMLACSAEADVIFTSTASETPLFLKEHVKDLPPVSSEVGGLRLFIDISVPRNVGSCVTDVEGAQVYNVDDLKEVVAANKEDRLRKAMEAQAIITEEL…	84.2	0	gi|2495155|sp|P93111.1|HEM11_CUCSA	RecName: Full=Glutamyl-tRNA reductase 1, chloroplastic; Short=GluTR; Flags: Precursor	84.2	0	sp|P93111|HEM11_CUCSA	Glutamyl-tRNA reductase 1, chloroplastic OS=Cucumis sativus GN=HEMA1 PE=2 SV=1	83.33	0	A6Q0F0	A6Q0F0_TOBAC Glutamyl-tRNA reductase (Fragment) OS=Nicotiana tabacum GN=hemA PE=2 SV=1	SA1496	177	2e-49	COG0373	Glutamyl-tRNA reductase	H	Coenzyme transport and metabolism ;	K02492|1|0.0|885|tcc:TCM_034582|EC[not_get]	cellular_process metabolic_process	cell cell_part organelle	binding catalytic_activity
250	CotAD_72228	locus=scaffold4311.1:42616:44774:+ [translate_table: standard]	27521	0.588	2|3|2	16|35|21	-/-/-	CotAD_72228	MTKCYPTVSEDYQNAVQKAKRKLIGLIAEKNCAPLMLRLAWHSAGTFDVKTKTGGPFGTMKQPAELAHAANNGLDIAVRLLEPIKEQLPILSYADFYQLAGVVAVEITGGPEIPFHPGREDKPHPPPEGRLPNATEGADHLRQVFSNQMGLSDQDIVALSGGHTLGRCHKERSGFEGPWTTNPLIFDNSYFKELLTGEKAGLLQLPTDKVLLSDPVFRPLVDKYAADEDAFFADYTEAHLKLSELGFADA	99.6	5e-172	gi|211906476|gb|ACJ11731.1|	ascorbate peroxidase [Gossypium hirsutum]	83.47	2e-145	sp|Q9FE01|APX2_ORYSJ	L-ascorbate peroxidase 2, cytosolic OS=Oryza sativa subsp. japonica GN=APX2 PE=1 SV=1	99.6	7e-171	C6ZDA9	C6ZDA9_GOSHI Ascorbate peroxidase OS=Gossypium hirsutum GN=cAPX2 PE=2 SV=1	XF2232	48.9	4e-06	COG0376	Catalase (peroxidase I)	P	Inorganic ion transport and metabolism ;	K00434|1|3e-160|446|zma:100384480|EC[not_get]	metabolic_process response_to_stimulus		antioxidant_activity binding catalytic_activity
251	CotAD_44397	locus=Dt_chr8:19678849:19681287:+ [translate_table: standard]	23871.8	0.037	-|1|-	-|2|-	-/Cotton_D_gene_10023882/-	CotAD_44397	MHRASALFVGVYEPTKQKLLKLFPENLSAVAHLTAGAIGGIAASLIRVPTEVVKQRMQTGQFTSASNAVHVIASKEGFKGLYAGYGSFLLRDLPFDAIQFCIYEQIRIGYKAAARRDLNDPENAIIGAFAGALTGAITTPLDVIKTRLMVQGSANQYKGIFDCVQTIIREEGPSALLKGIQPRVLWIGIGGSIFFGVLESTKRLLAERRSKPTQQSKHD	87.04	2e-130	gi|255578799|ref|XP_002530256.1|	mitochondrial carrier protein, putative [Ricinus communis]	38.73	4e-34	sp|Q4V9P0|SAMC_DANRE	S-adenosylmethionine mitochondrial carrier protein OS=Danio rerio GN=slc25a26 PE=2 SV=1	87.04	3e-129	B9SW87	B9SW87_RICCO Mitochondrial carrier protein, putative OS=Ricinus communis GN=RCOM_0075490 PE=3 SV=1	-	-	-	-	-	-	-	K15111|1|4e-137|389|tcc:TCM_001276|EC[not_get]	localization	cell cell_part membrane membrane_part organelle organelle_part
252	CotAD_72962	locus=Dt_chr4:13943253:13946271:+ [translate_table: standard]	41513.5	0.033	1|-|-	1|-|-	CotAD_68847;Cotton_D_gene_10027989/-/-	CotAD_72962	MAMALSNSVPSACIICLSASNQFYPPSSPFKSLKPPLFWPWQKVKMGPLTVSPMGFGTWAWGNQLLWGYQPSMDSQLQQVFNLAVENGINLFDTADSYGTGRLNGQSEKLLGKFIREFQGEKRIRDEIVIATKFAAYPWRLTSGQFVQACRASRDRMQIEQIGIGQLHWSTANYAPPQELALWNGLVAMYEKGLVKAVGVSNYGPKQLVKIHDYLKARGVPLCSAQVQFSLLSMGEDQMEIKNICDSLDIRLISYSPLGLGMLTGKYTPSRLPQGPRGLLFKQILPGLKPLLVSLREIAEKRCKTIPQVAINWCICKGTIPIPGVKTVKQAEENLGALGWRLSSSELLQLDYAAQESPQRMIQNIFQTK	83.92	0	gi|225455264|ref|XP_002273477.1|	PREDICTED: uncharacterized oxidoreductase At1g06690, chloroplastic-like [Vitis vinifera]	80.36	0	sp|Q56Y42|PLR1_ARATH	-	81.42	0	B9RPF3	B9RPF3_RICCO Aldo/keto reductase, putative OS=Ricinus communis GN=RCOM_1369160 PE=4 SV=1	mll1952	99.8	6e-23	COG0667	Predicted oxidoreductases (related to aryl-alcohol dehydrogenases)	C	Energy production and conversion ;	K05275|1|0.0|647|tcc:TCM_015486|EC[not_get]	metabolic_process		catalytic_activity
253	CotAD_25412	locus=scaffold149.1:869913:871732:- [translate_table: standard]	57622	0.203	1|1|1	3|4|4	CotAD_31080/CotAD_31080/CotAD_31080	CotAD_25412	MIVVSIRIAPNYSFMYDATSASTLSYYDYIIVGGGTAGCPLAATLSQNATVLLLERGGSPYGNPNITKMASFGAALSDLSQSSPSQRFISEDGVINARARVLGGGSCINAGFYTRASDEYIKQAGWDGRLVKESYQWMEKSVAFEPSLGQWQSAVRDGLLEAGVMPSNGFTYDHIYGTKVGGTIFDQQGNRHTAADLLEYANPSGLTVFLHASVHKILFAIKGKRRPKAHGVVFRDTTGAKHKAYLKQGSKNEIIVSAGALGSPQLLMLSGMGPAQHLKSHDITVVLDQPLVGQGMSDNPMNAVFIPSPLPVEVSLIQVVGITHFGSYIEAASGENFAGGASSSPAVEYMNNLDETTFRGGFILEKVMGPISTGHLELRTRNPNDNPSVTFNYFKDPQD…	77.02	0	gi|224053991|ref|XP_002298074.1|	predicted protein [Populus trichocarpa]	54.49	0	sp|Q9S746|HTH_ARATH	Protein HOTHEAD OS=Arabidopsis thaliana GN=HTH PE=1 SV=1	77.02	0	B9GKQ2	B9GKQ2_POPTR Predicted protein OS=Populus trichocarpa GN=POPTRDRAFT_548528 PE=3 SV=1	SMb20496	104	3e-23	COG2303	Choline dehydrogenase and related flavoproteins	E	Amino acid transport and metabolism ;	K00108|1|0.0|872|pop:POPTR_0001s08620g|EC[not_get]	metabolic_process single-organism_process		binding catalytic_activity
254	CotAD_20790	locus=At_chr9:48769915:48775190:+ [translate_table: standard]	98130.5	0.012	1|-|-	1|-|-	-/-/-	CotAD_20790	MAGIGDDVGFGNFMFFSSSSSHSINGPQFSAKDMTTTAAAANDDDDDDWGDFINSSNNISCTESLPVNDFQFDSSPGSPPLTQSDSAPSRVESVKAQWDKLTGALPLSIFGEEEKEDGGSDAVDAGFNGVNSSFSFPKQDGNLKEKGSNLNDVLADLYKEKEKGNEANGFRSGVDVKKAIDLNSKAETWNWNGLNSGLNGSGLKVDALDLSINGPASVKKEENLGSNGYAFGKERKEVNMGLSGLDLSSNGSSWGQEGLNLDSNAGNSVLVDEEDDDGWEFKGAEPKAEAAAENLKSNPNVPMSNCNMSTSSWDPLGTNTSVLSSNINGAAEPETRFTTGDAKVEDQDREKPQGAEFSFGFGNGANGSSDFFGTSDGISKKPGEWDLGFSFSPSFESQS…	47.29	1e-137	gi|224125278|ref|XP_002319546.1|	predicted protein [Populus trichocarpa]	-	-	-	-	47.29	2e-136	B9I7W6	B9I7W6_POPTR Predicted protein OS=Populus trichocarpa GN=POPTRDRAFT_570851 PE=4 SV=1	-	-	-	-	-	-	-	-	-	-	-
255	CotAD_08323	locus=scaffold190.1:681850:686092:- [translate_table: standard]	38019.8	0.193	1|-|1	3|-|1	-/-/-	CotAD_08323	MEVFCSLSWTHSISPRLHIPHSFSVGETNRFRVICSAAQSPKANLMTVSVTGATGFIGTRLVQRLHADNHKVCVLTRSKSKAETIFPVKNFPGIVIAEEAGWKDCIEGSNAVVNLAGMPISTRWSPEIKKEIKESRIRVTSKVVDLINSSPQGVRPTVLVSATAFGYHGTSETRVFDENSPSGNDYLAEVCREWEGTALKVDKDVRLALIRIGVVLGKDGGALAKMIPLFMMFAGGPLGSGQQWFSWIHLDDIVNLIYEALSNPSYKGVINGTAPNPVRLSEMCNQLGNVLGRPSWLPVPDFALKAVLGEGASVVLEGQKVVPAKAKELGFPFKYPYVKDALKSILS	82.34	0	gi|255543879|ref|XP_002513002.1|	conserved hypothetical protein [Ricinus communis]	50.49	4e-104	sp|P73467|Y1223_SYNY3	Epimerase family protein slr1223 OS=Synechocystis sp. (strain PCC 6803 / Kazusa) GN=slr1223 PE=3 SV=2	82.34	0	B9RG50	B9RG50_RICCO Putative uncharacterized protein OS=Ricinus communis GN=RCOM_1450710 PE=4 SV=1	TVN0505	135	6e-37	COG1090	Predicted nucleoside-diphosphate sugar epimerase	R	General function prediction only ;	K07071|1|0.0|636|tcc:TCM_006776|EC[not_get]	metabolic_process		binding
256	Cotton_D_gene_10025196	locus=scaffold39:1498556:1500858:+ [translate_table: standard]	24242.1	0.446	2|1|1	3|1|1	CotAD_04730/CotAD_04730/CotAD_04730	Cotton_D_gene_10025196	MAVTFSDLHTESGLKSLNDFLTGKSYISGDKLTKDDIKVYAAVLKNPGDSFPNVSQWYNCVSSHLAASFPGKAVGVSLAGKADPAQSAEAKSPAADDDDDDLDLFGDETEEDKKAAEEREAAKKSAKKKESGKSSVLMDVKPWDDETDMKQLEEAVRSVEMPGLLWGASKLVAVGYGIKKLQIMLTIVDDLVSVDTLIEEYLTVEPRNEYIQSCDIVAFNKI	80.36	3e-96	gi|351724085|ref|NP_001238069.1|	uncharacterized protein LOC100306132 [Glycine max]	71.05	7e-88	sp|Q84WM9|EF1B1_ARATH	Elongation factor 1-beta 1 OS=Arabidopsis thaliana GN=At5g12110 PE=2 SV=2	80.36	4e-95	C6SY42	C6SY42_SOYBN Putative uncharacterized protein OS=Glycine max PE=2 SV=1	YAL003w	98.6	6e-25	COG2092	Translation elongation factor EF-1beta	J	Translation, ribosomal structure and biogenesis ;	K03232|1|5e-109|315|tcc:TCM_041041|EC[not_get]	cellular_process metabolic_process
257	CotAD_15524	locus=scaffold165.1:1369599:1370828:+ [translate_table: standard]	19118.5	0.208	2|1|2	4|3|5	Cotton_D_gene_10002427/Cotton_D_gene_10002427/Cotton_D_gene_10002427	CotAD_15524	MLVYQDLLTGDELLSDSFPYKEIENGMLWEVEGKWVVQGAVNVDIGANPSAEGGDDDEGVDDQAVKVVDIVDTFRLQEQPAFDKKQFVTFMKRYIKNLTPKLEPEKQESFKKNIEGATKFLMSKLKDLQFFVGESMHDDGSLVFAYYKDGATDPTFLYFAYGLKEIKC	93.45	8e-105	gi|75222628|sp|Q5J907.1|TCTP_ELAGV	RecName: Full=Translationally-controlled tumor protein homolog; Short=TCTP	93.45	3e-105	sp|Q5J907|TCTP_ELAGV	Translationally-controlled tumor protein homolog OS=Elaeis guineensis var. tenera GN=TCTP PE=2 SV=1	92.86	2e-103	B3TM14	B3TM14_ELAGV Translationally controlled tumor protein OS=Elaeis guineensis var. tenera PE=2 SV=1	-	-	-	-	-	-	-	-		cell cell_part
258	Cotton_D_gene_10006662	locus=scaffold353:75227:79127:- [translate_table: standard]	62400.9	0.093	2|2|3	7|4|4	CotAD_59831;CotAD_22014/CotAD_59831;CotAD_22014/CotAD_59831;CotAD_22014	Cotton_D_gene_10006662	MAAENSSSKSASTADSYIGSLISLTSKSEIRYEGVLYNINPDESSIGLRNVRSFGTEGRKKDGPQVPPSDKVYEYILFRGSDIKDLQVKSSPPTQPTPPINNDPAIIQSHFPHSVSTTTSMPSAASGPLTDLTSHNTQMGLAGFNFQAALPLYQPGGNIGSWGASPQPPTANGSGLAMPMYWQGYYAPPNALPHLHQQTLLRPSPGLSVPPSMPQPMQYPNFNASLPAGSANLHSSSLPEIPPSLLPTSTSSHMLTSSLSFATSSSLPPAPSATLASETLSASLTSPSPPPATLSASSPALAPLTSSSPELNSIAPPIANKRSEIPTLPYQSASEVASSVIGVSNSIHVETSTPSLVTPGQLLQSGSTVVPSSQPAATAHKDVEVVQVSSSLSPEPSVP…	79.26	1e-118	gi|462419695|gb|EMJ23958.1|	hypothetical protein PRUPE_ppa006535mg [Prunus persica]	71.71	1e-90	sp|Q9C658|DCP5_ARATH	Protein decapping 5 OS=Arabidopsis thaliana GN=DCP5 PE=1 SV=1	79.63	2e-112	F6HF25	F6HF25_VITVI Putative uncharacterized protein OS=Vitis vinifera GN=VIT_01s0011g02820 PE=4 SV=1	-	-	-	-	-	-	-	K18749|1|2e-132|405|tcc:TCM_011884|EC[not_get]	-	-	-
259	CotAD_03340	locus=Dt_chr6:7845715:7846261:- [translate_table: standard]	12153.8	0.067	1|-|-	1|-|-	CotAD_18874;Cotton_D_gene_10017238/-/-	CotAD_03340	MADSSSSSSSSSSYIHMVHRLIEECLVFKMSKEECMEALSKHANIKPVITSTVWIELEKENKEFFEAYTRGSHERATEIEETPRIQRSLHAYIRDNNGNDQLHY	80.82	2e-36	gi|356572355|ref|XP_003554334.1|	PREDICTED: uncharacterized protein LOC100785268 [Glycine max]	-	-	-	-	80.82	3e-35	I1NA13	I1NA13_SOYBN Uncharacterized protein OS=Glycine max GN=Gma.24218 PE=4 SV=1	-	-	-	-	-	-	-	-	-	-	-
260	CotAD_42419	locus=Dt_chr9:63182639:63186654:- [translate_table: standard]	48208.3	0.086	2|1|-	2|1|-	CotAD_12365;Cotton_D_gene_10015782;CotAD_38067;Cotton_D_gene_10032049/CotAD_12365;Cotton_D_gene_10015782;CotAD_38067;CotAD_36339;Cotton_D_gene_10032049/-	CotAD_42419	MDKMKIEEVQSTAKKQRIATHTHIKGLGLDATGNAIPLSAGFVGQAEAREAAGLVVDMIRQKKMAGRALLLAGPPGTGKTALALGISQELGSKVPFCPMVGSEVYSSEVKKTEVLMENFRRAIGLRIKENKEVTELSPEETESVTGGYGKSISHVIIGLKTVKGTKQLKLDPTIYDALIKEKVAVGDVIYIEANSGAVKRVGRSDAFATEFDLEAEEYVPLPKGEVHKKKEIVQDVTLHDLDAANARPQGGQDILSLMSQMMKPRKTEITDKLRQEINKVVNRYIDEGVAELVPGVLFIDEVHMLDMECFSYLNRALESSLSPIVIFATNRGICNVRGTDMNSPHGIPVDLLDRLVIIRTQIYGPSEMIQILAIRAQVEELVVDEESLALLGEIGQSTS…	94.33	0	gi|255565715|ref|XP_002523847.1|	DNA helicase, putative [Ricinus communis]	73.52	0	sp|Q9DE26|RUVB1_XENLA	RuvB-like 1 OS=Xenopus laevis GN=ruvbl1 PE=2 SV=1	94.33	0	B9SCX8	B9SCX8_RICCO DNA helicase, putative OS=Ricinus communis GN=RCOM_1282210 PE=4 SV=1	ECU11g1270	261	2e-82	COG1224	DNA helicase TIP49, TBP-interacting protein	K	Transcription ;	K04499|1|0.0|850|tcc:TCM_041353|EC[not_get]	metabolic_process		binding catalytic_activity
261	Cotton_D_gene_10030801	locus=scaffold2:2009340:2015194:- [translate_table: standard]	61223.3	0.108	1|3|1	1|6|2	CotAD_70275/CotAD_70275/CotAD_70275	Cotton_D_gene_10030801	MAQVVATRSIHGSFLSQGTGSVQERAVKLKPASFGSKVLALDEKKNKRVVLGKNSRITAKRAVRAEPEIIPVSPEDVPEREEQYEQLRGIQQVGDTSVAMWSKPVVRRKTKIVCTIGPSTNTREMIWKLAETGMNVARLNMSHGDHASHQKGPEVRSGDLPQPITLTTGQEFTFTIRRGVGTPDCVSVNYDDFVNDVEVGDMLLVDGGMMSLVVKSKTEDSVKCEVVDGGELKSRRHLNVRGKSATLPSITEKDWDDIKFGVDNKVDFYAVSFVKDAQVVHELKNYLQSCDADIHVIVKIESADSIPNLHSIITASDGAMVARGDLGAELPIEEVPLLQEEIIRTCRSMGKAVIVATNMLESMIVHPTPTRAEVSDIAIAVREGADAVMLSGETAHGKF…	84.05	0	gi|255545104|ref|XP_002513613.1|	pyruvate kinase, putative [Ricinus communis]	81.35	0	sp|Q9FLW9|PKP2_ARATH	Plastidial pyruvate kinase 2 OS=Arabidopsis thaliana GN=PKP2 PE=1 SV=1	84.05	0	B9RIP4	B9RIP4_RICCO Pyruvate kinase OS=Ricinus communis GN=RCOM_1581420 PE=3 SV=1	PH0570	262	9e-81	COG0469	Pyruvate kinase	G	Carbohydrate transport and metabolism ;	K00873|1|0.0|1077|tcc:TCM_015300|EC[not_get]	cellular_process developmental_process metabolic_process multicellular_organismal_process response_to_stimulus single-organism_process	cell cell_part organelle organelle_part	binding catalytic_activity
262	CotAD_55293	locus=Dt_chr5:21483671:21487960:+ [translate_table: standard]	40986.9	0.494	2|3|3	14|12|14	-/-/-	CotAD_55293	MKATLPTPHLRSFPSPTPLSFKLSFAFPETRRKSLSISSTPKGTPSPSLAYVPLRVTASSQAASAPTVNLTAIPTEMKAWVYGEYGGVDVLKLDEKVSVPEVKEDEVLIKVAAAALNPVDAKRRQGKFKATDSPLPTVPGYDVAGVVVKVGSQVKELKEGDEVYGNINEKALEGPRQFGSLAQYTTVEEKLLALKPKNLDFAQAAGLPLAIETAYQGLERTGFSSGKSILVLNGSGGVGSLVIQLAKQVFGASKVAATSSTGKLELLKSLGVDLAIDYIKENFEDLPEKFDVVFDAIGQCDRAVKAVKEGGSVVALTGAVTPPGFRFVVTSKGEVLKKLNPYLESGKVKPVVDPRGPFPFTQVDEAFSYIETNRATGKVVIHPIP	79.34	0	gi|255568816|ref|XP_002525379.1|	alcohol dehydrogenase, putative [Ricinus communis]	81.93	2e-163	sp|Q9ZUC1|QORL_ARATH	Quinone oxidoreductase-like protein At1g23740, chloroplastic OS=Arabidopsis thaliana GN=At1g23740 PE=1 SV=2	79.34	0	B9SHB0	B9SHB0_RICCO Alcohol dehydrogenase, putative OS=Ricinus communis GN=RCOM_0528460 PE=4 SV=1	Cgl2948	102	5e-24	COG0604	NADPH:quinone reductase and related Zn-dependent oxidoreductases	CR	Energy production and conversion ; General function prediction only ;	K18980|1|0.0|566|tcc:TCM_010355|EC[not_get]	metabolic_process		binding catalytic_activity
263	CotAD_06716	locus=Dt_chr10:19749109:19756919:+ [translate_table: standard]	87930.8	0.033	2|-|2	2|-|2	Cotton_D_gene_10039193;CotAD_31486/-/Cotton_D_gene_10039193;CotAD_31486	CotAD_06716	MAAPETSTAAVPTLYTNNTLRNAFGGVLSFFILLLIGVMAFSIRLFSVIKYESVIHEFDPYFNYRVTQFLAKNGIYEFWNWFDDRTWYPLGRVIGGTVYPGLTLTAGTIWWLLNSLNIPLSVETVCVFTAPIFSAFASWATYLLTKEVKGTGAGLTAAALLAMVPSYISRSVAGSYDNEAVAIFALIFTFYLYIKTLNTGSLFYATLNSIAYFYMVCSWGGYTFIINLIPMHVLLCIVTGRFSSRLYIAYAPLVVLGTLLAALVPVVGFNAVMTSEHFASFLVFIIIHVVAFVYYIKGILSPKMFKVAVTLVVSVGLAVCCAVIAVLIALVASSPTKGWSGRSLSLLDPTYASKYIPIIASVSEHQPPTWPSYFMDINVLAFLVPAGIIACFLPLSDAS…	87.75	0	gi|225445126|ref|XP_002280521.1|	PREDICTED: dolichyl-diphosphooligosaccharide--protein glycosyltransferase subunit STT3 [Vitis vinifera]	85.3	0	sp|Q93ZY3|STT3A_ARATH	-	87.75	0	D7TBI1	D7TBI1_VITVI Putative uncharacterized protein OS=Vitis vinifera GN=VIT_11s0016g03320 PE=4 SV=1	MTH420	51.6	5e-06	COG1287	Uncharacterized membrane protein, required for N-linked glycosylation	R	General function prediction only ;	K07151|1|0.0|1253|tcc:TCM_037807|EC[not_get]	cellular_process metabolic_process response_to_stimulus	cell cell_part membrane organelle	catalytic_activity
264	Cotton_D_gene_10035905	locus=scaffold5:4172357:4177470:- [translate_table: standard]	86147.4	0.012	1|-|1	1|-|1	CotAD_64412;CotAD_26358/-/CotAD_64412;CotAD_26358	Cotton_D_gene_10035905	MAERTSTSSSHSLKYTNRLATEHSPYLLQHAHNPVDWYPWGEEAFAEARKRDVPIFLSIGYSTCHWCHVMEVESFENEEVAKLLNDWFVSIKVDREERPDVDKVYMTYVQALYGGGGWPLSVLLSPDLKPLMGGTYFPPEDKYGRPGFKTILRKVKDAWDNKRDMIVKSGAFAIEQLSEALSASAGSNQLPDGLAQNALRLCAEQLSNSYDSRFGGFGSAPKFPRPVEIQLMLYQSKKLEESRKPGEAKESLKMVFFSLQCMARGGMHDHVGGGFHRYSVDECWHVPHFEKMLYDQGQLANVYLDAFFISRDILYSFISRDILDYLRRDMIGSEGGIFSAEDADSAEFEGATRKKEGAFYIWTSKEIDDILGEHASLFKEHYYVKPSGNCDLSSMSDPH…	81.55	0	gi|359479833|ref|XP_002267103.2|	PREDICTED: spermatogenesis-associated protein 20-like [Vitis vinifera]	41.95	0	sp|Q8TB22|SPT20_HUMAN	Spermatogenesis-associated protein 20 OS=Homo sapiens GN=SPATA20 PE=2 SV=3	80.92	0	F6HQ08	F6HQ08_VITVI Putative uncharacterized protein OS=Vitis vinifera GN=VIT_07s0104g01480 PE=4 SV=1	APE2533	248	7e-72	COG1331	Highly conserved protein containing a thioredoxin domain	O	Posttranslational modification, protein turnover, chaperones ;	K00943|1|2e-87|277|osa:4326794|EC[not_get]	-	-	-
265	Cotton_D_gene_10013234	locus=scaffold153:294998:298682:+ [translate_table: standard]	67876.3	0.051	-|3|-	-|3|-	-/CotAD_04828/-	Cotton_D_gene_10013234	MAEISEAPDSDSSKLFGSDSKAPQRPDSEPEFDPKLMRKTKPGLKRLFLTFSVLFSFLLGFPFLWKSVEIYRSPLPFREIDSLSTQLRSDTLLFPLHFHALFVGFDSDPDRLRWSILSEITKLTSQNPKCSDNYTLSVTVDLGSRCLRGRTSSPHSSSYQCGSVTGGDFVQNDDVAVDERLASVFGGKNNEYSMAVVKGVSERAVVGKYRHAWMVVGDGSDVEMAVVKVAEVLIKVFINGGREEGLIRNEFMPVGADGKIVLSFNLLNADPHDWVYDWDFEKIDDTLLTPMIEALGPVANISVESQVLYHTPKASFSYWNQKLESYVFSTKDLPFFVNSNEWHLDTSIAAGGRSKILQFAVYVPSAKECPLLLQLPNGEISKTNGFISPMWGGVIVWNP…	67.64	0	gi|462395159|gb|EMJ00958.1|	hypothetical protein PRUPE_ppa003075mg [Prunus persica]	28.15	3e-36	sp|Q3SZL5|PIGS_BOVIN	GPI transamidase component PIG-S OS=Bos taurus GN=PIGS PE=2 SV=3	67.12	0	D7L6H5	D7L6H5_ARALL Putative uncharacterized protein OS=Arabidopsis lyrata subsp. lyrata GN=ARALYDRAFT_896875 PE=4 SV=1	-	-	-	-	-	-	-	K05291|1|0.0|933|tcc:TCM_002881|EC[not_get]		cell cell_part membrane organelle organelle_part
266	CotAD_30565	locus=Dt_chr12:5288429:5290139:- [translate_table: standard]	28827.1	0.065	-|-|1	-|-|4	-/-/Cotton_D_gene_10004237	CotAD_30565	MAAPKFSLTLLCFTSLLPFFTSVNAKIPGVYSTGSWETAHATFYGGSDASGTMGGACGYGNLYSQGYGVNTAALSTALFNNGLSCGACFEIKCASDPRWCHPGSPSIFVTATNFCPPNFALPSDNGGWCNPPRPHFDLAMPMFLKIAEYRAGIVPVSFRRVPCRKHGGIRFTVNGFRYFNLVLITNVAGAGDLVKVSIKGTKTGWMSMSRNWGQNWQSNAVLIGQALSFRVTGSDKRTSTSWNVAPPNWQFGQTFTGKNFRI	90	3e-165	gi|225440374|ref|XP_002266625.1|	PREDICTED: expansin-A4 [Vitis vinifera]	84.1	7e-158	sp|O48818|EXPA4_ARATH	Expansin-A4 OS=Arabidopsis thaliana GN=EXPA4 PE=1 SV=1	90	4e-164	A5BPE2	A5BPE2_VITVI Putative uncharacterized protein OS=Vitis vinifera GN=VIT_08s0007g00440 PE=3 SV=1	-	-	-	-	-	-	-	K00051|1|1e-11|67.4|obr:102709764|EC[not_get]		cell cell_part
267	CotAD_08744	locus=At_chr1:52508929:52510300:- [translate_table: standard]	39557.9	0.025	-|1|-	-|1|-	-/-/-	CotAD_08744	MASDGQQQQVPPQKQDAQPGKEHVMNPIPEYYSSNYQPSNKLQGKVALVTGGDSGIGRAVCHSFALEGATVAFTYVKSQEEKDAQDSLEILRKAKTSDAKDPLAVSADLGYDKNCKQVVDEVVKAFGRIDILVNNAAEQYKASSVEEIDEERLDRVFRTNIYSQFFLSRHALKYMKEGSSIINTTSVNAYKGNDKLLDYTATKGAIVAFTRGLSQQLVNRGVRVNTVAPGPIWTPLIPASFDEGPGSSIINTTSVNAYKGNDKLLDYTATKGAIVAFTRGLSQQLVNRGVRVNTVAPGPIWTPLIPASFDEEETAQFGAQVPMKRPGQPSEVAPCFVFLACNHCSSYMTGQTLHPNGGTVVNG	79.02	5e-133	gi|255542606|ref|XP_002512366.1|	short chain dehydrogenase, putative [Ricinus communis]	76.34	2e-130	sp|Q5KTS5|GRDH_DAUCA	Glucose and ribitol dehydrogenase OS=Daucus carota GN=CAISE5 PE=2 SV=1	79.02	7e-132	B9RF47	B9RF47_RICCO Short chain dehydrogenase, putative OS=Ricinus communis GN=RCOM_1431360 PE=4 SV=1	SA1074	100	3e-24	COG1028	Dehydrogenases with different specificities (related to short-chain alcohol dehydrogenases)	IQR	Lipid transport and metabolism ; Secondary metabolites biosynthesis, transport and catabolism ; General function prediction only ;	K11147|1|1e-26|109|vcn:VOLCADRAFT_107595|EC[not_get]	metabolic_process		catalytic_activity
268	CotAD_29455	locus=scaffold743.1:448624:449604:- [translate_table: standard]	37942	0.141	1|-|1	1|-|1	-/-/-	CotAD_29455	MESHIEKQNRDVLQKSFKEMISTLPKENCWGIPEALYQYQGFWLTPPFLQGALSAQQQFQAQPTDIILCSSPRTGAAWLKSLTFATITRTSYNDSTTPLLSKMPHDVVPFMEFDHAQFSTNRHLGIPLLATHLPYSFLPRSIIDSGCKLIYICRDPKDTFVSLHHFNARYNKSQNTQPVQLDEAFELFYEGVNWYGPYWDHVLGYWKASLEHPDKLLFLKYEELIEDTVLYLKKIAEFMGYPFSSEEQQQGVPENIVQLCSFENLNGLEVNKTGKHRDGQGDLAMENNIFFRKGKVGDWKNYLTTEMARRLDQRTLQKFRGSGLSV	55.16	5e-131	gi|255547107|ref|XP_002514611.1|	Flavonol 3-sulfotransferase, putative [Ricinus communis]	47.91	9e-107	sp|P52838|FSTL_FLABI	Flavonol sulfotransferase-like OS=Flaveria bidentis PE=2 SV=1	55.16	6e-130	B9RLJ2	B9RLJ2_RICCO Flavonol 3-sulfotransferase, putative OS=Ricinus communis GN=RCOM_1467760 PE=4 SV=1	-	-	-	-	-	-	-	K01025|1|2e-108|322|vvi:100267913|EC[not_get]!K11821|2|6e-106|315|aly:ARALYDRAFT_895283|EC[not_get]			catalytic_activity
269	CotAD_39016	locus=Dt_chr2:11521632:11525775:- [translate_table: standard]	58760.3	0.064	1|-|-	1|-|-	-/-/-	CotAD_39016	MGGEGDSSESRLGTNGEDEGLLVNIRCSNGSKFTVRTSLESTVGVFKSLLAQNCDVPADQQRLIYKGRVLKDDQTLQSYGLQADHTIHMVRSFTPSSSIPPPAATTNTATPNSTPGVTRGVGSNEGAGLGASSFPGLNALGGNGGLGLFGSGLPEFEQVQQQLTQNPNMMSELMNTPAIQSLMNNPELMRSLIVSNPQMREIIDQNPELGHILNDPSILQQTLEAARNPELMREMMRNTDRAMSNIESSPEGFNMLRRMYENVQEPFMNATTMAGNNGNSPSSNPFAALLSNLGDSQARSLPNNTSTNGSETTHGQTSPNTNPLPNPWGNTVGGGGAQTNATARSNPAGDARAPGLGGLGGLGLPDVPPMMNGMPDASQLTQLLQNPALSQMMQSIVSN…	96.73	0	gi|327344117|gb|AEA50963.1|	putative PDF1-interacting protein 1, partial [Gossypium barbadense]	36.77	4e-53	sp|Q9JJP9|UBQL1_RAT	Ubiquilin-1 OS=Rattus norvegicus GN=Ubqln1 PE=1 SV=1	96.73	0	F2YRD1	F2YRD1_GOSBA Putative PDF1-interacting protein 1 (Fragment) OS=Gossypium barbadense PE=2 SV=1	YLL039c	49.7	9e-06	COG5272	Ubiquitin	O	Posttranslational modification, protein turnover, chaperones ;	K04523|1|0.0|668|vvi:100267604|EC[not_get]	-	-	-
270	CotAD_24184	locus=Dt_chr7:36478998:36482623:- [translate_table: standard]	54030.4	0.202	1|1|1	4|3|5	-/-/-	CotAD_24184	MGQSRFIDFLFVLLTCFTCFSSSFGDQNLDKITELPGQPKNVDFNQYSGYVTVNEEAGRALFYWFIESPLNRRPETRPLILWLNGGPGCSSVAYGAAEEIGPFRIRPDGKTLYFNPYAWNKLANTLFLESPAGVGFSYTNTTSDLYTSGDKRTAEDAYVFLVNWLERFPQYKYRDFYIAGESYAGHYVPQLAQIVYERNKGVQIPVINFKGFMVGNAVTDDYHDFVGTFEYWWTHGLISDSTYRNLQVACDMGSATHPSSECTTALEVAEAEQGNIDPYSIFTQPCADTTSLRRNLRGHYPWMSRAFDPCTERYSKEYFNRPEVQKALHANVTGIPYQWETCSDVIGYNWTDSPLSMLPIYQELIAAGIRIWVYSGDTDAVVPVTATRYSIDALKLPTI…	83.64	0	gi|224100813|ref|XP_002312024.1|	predicted protein [Populus trichocarpa]	74.94	0	sp|Q9SFB5|SCP27_ARATH	Serine carboxypeptidase-like 27 OS=Arabidopsis thaliana GN=SCPL27 PE=2 SV=1	83.64	0	B9HLN0	B9HLN0_POPTR Predicted protein OS=Populus trichocarpa GN=POPTRDRAFT_1084309 PE=4 SV=1	SPAC1296.03c	79.7	3e-15	COG2939	Carboxypeptidase C (cathepsin A)	E	Amino acid transport and metabolism ;	K16297|1|0.0|798|tcc:TCM_043102|EC[not_get]	metabolic_process		catalytic_activity
271	Cotton_D_gene_10034738	locus=scaffold12:3213034:3213552:+ [translate_table: standard]	18655.9	0.192	1|2|2	2|3|3	CotAD_12743;CotAD_54563/CotAD_12743;CotAD_54563/CotAD_12743;CotAD_54563	Cotton_D_gene_10034738	MASPTLITPTSKLKPLLPIKARATQRPPSPPPHQQPLRRQFLCLAAAAAATTTASLALGGVQSAFAASDEEYVKETAEVINKVRSTINMDKNDPNIASAVAELREASNSWVAKYRREKALLGRASFRDMYSALNAISGHYISFGPTAPIPAKRKARILEEMDTAEKALSRGR	69.77	1e-70	gi|225447221|ref|XP_002277789.1|	PREDICTED: thylakoid lumenal protein At1g03610, chloroplastic-like [Vitis vinifera]	82.24	1e-61	sp|Q9LR64|Y1360_ARATH	Thylakoid lumenal protein At1g03610, chloroplastic OS=Arabidopsis thaliana GN=At1g03600 PE=1 SV=1	65.56	3e-69	B9GT03	B9GT03_POPTR Predicted protein OS=Populus trichocarpa GN=POPTRDRAFT_643350 PE=4 SV=1	-	-	-	-	-	-	-	K08902|1|9e-79|234|tcc:TCM_008025|EC[not_get]	-	-	-
272	CotAD_68215	locus=At_chr6:36993236:36999364:+ [translate_table: standard]	51835.6	0.25	2|2|1	4|4|2	-/-/-	CotAD_68215	MSWKFSVSHSLPLFLLLFLYSFPLISTQQNDDPTFKTMHDFSGYPVDKSSYTFTPSNSSSLSVDIQALQKQIDELSTFSDTPAPSVTRILYTENDVLARRYVKNLMGLTGLSVTEDVVGNIFGRWDGYEPELTAVATGSHIDAIPYSGKYDGVVGVLGAIEAINALKRSGFKPKRSLEIILFTSEEPTRFGIGCLGSRLLAGGEALAEALKTTVDGQNISFLEAARSAGYARDEDDLSSVFLKNDSYSAFVELHIEQAPILEEEGISIGVVTNIAAPASIKVDFEGNGGHAGGVLMPDRNDAGLAAAELMLAIEKHVTESGSLDTVGTVGILELYPGAINSIPSKAHLEIDVRDIEESFRNAVINKIHKAAKSIAKKRKVTLSEFKIINQDPLAHSNGS…	77.43	0	gi|462419865|gb|EMJ24128.1|	hypothetical protein PRUPE_ppa005238mg [Prunus persica]	35.14	4e-68	sp|Q01264|HYUC_PSESN	Hydantoin utilization protein C OS=Pseudomonas sp. (strain NS671) GN=hyuC PE=1 SV=1	79.59	0	B9HUC9	B9HUC9_POPTR Predicted protein OS=Populus trichocarpa GN=POPTRDRAFT_769208 PE=4 SV=1	AGc4327	166	4e-46	COG0624	Acetylornithine deacetylase/Succinyl-diaminopimelate desuccinylase and related deacylases	E	Amino acid transport and metabolism ;	K18151|1|0.0|686|tcc:TCM_020797|EC[not_get]	-	-	-
273	CotAD_49267	locus=At_chr8:68314804:68316454:+ [translate_table: standard]	26399.1	0.047	1|1|1	1|1|1	Cotton_D_gene_10001512;CotAD_15867/Cotton_D_gene_10001512;CotAD_15867/Cotton_D_gene_10001512;CotAD_15867	CotAD_49267	MALTSSSSSSAITALLKPHLQLSNEPIISFSPSFFTLSSKPLLSSSKPNVKINFFSSQTAVSLKWRTEASIFSGLFTKSKDIKTLKDELFDAIAPLDRGAEAAPEDQQRVDQIALKLEALNEIKEPLKSNLLNGKWELLYTTSQSLLQTKRPKFLRPNGKIYQAINVDTLRAQNMETWPFFNQATANLVPINARRVAVKFDYFRIVGLIPIKSPGSGRGQLEITYLDEELRSDIKR	83.93	2e-89	gi|225448063|ref|XP_002273405.1|	PREDICTED: probable plastid-lipid-associated protein 4, chloroplastic [Vitis vinifera]	63.09	1e-56	sp|Q9LU85|PAP4_ARATH	Probable plastid-lipid-associated protein 4, chloroplastic OS=Arabidopsis thaliana GN=PAP4 PE=1 SV=1	83.93	3e-88	F6H915	F6H915_VITVI Putative uncharacterized protein OS=Vitis vinifera GN=VIT_12s0034g01180 PE=4 SV=1	-	-	-	-	-	-	-	-	-	-	-
274	Cotton_D_gene_10038175	locus=scaffold57:3032689:3033939:- [translate_table: standard]	39872.8	0.088	1|1|2	9|6|3	CotAD_28388;Cotton_D_gene_10025401;CotAD_34969;CotAD_13017/CotAD_28388;Cotton_D_gene_10025401;CotAD_34969;CotAD_13017/CotAD_28388;Cotton_D_gene_10025401;CotAD_34969;CotAD_13017	Cotton_D_gene_10038175	MVVSFLSKLSILTFTASVLVVSALAHDFSIVGYSPEDLSSRDKLIELFESWVSKHAKFYESFEEKLLRFEVFKDNLKHIDKRNKEISSYWLGLNEFADLTHEEFKNKYLGLKPEVFKKNRSPPEEFTFRDDVDLPKSVDWRQKGAVTPVKNQRSCGSCWAFSAVAAVEGINKIVTGNLTSLSEQELIDCDTSFNNGCNGGLMDYAFEFIVANGGLHKEEDYPYLMEQGTCEEKKEEMDVVTISGYKDVPENDEKSLLKALAHQPLSVAIEASGRDFQFYSGGVFNGPCGTDLDHGVAAVGYGTWKGSDYIIVKNSWGAKWGEKGYIRMKRNTGKPEGLCGINKMASYPMKNK	80.97	0	gi|224131910|ref|XP_002328138.1|	predicted protein [Populus trichocarpa]	74.43	0	sp|O65493|XCP1_ARATH	Xylem cysteine proteinase 1 OS=Arabidopsis thaliana GN=XCP1 PE=1 SV=1	80.97	0	B9MZ15	B9MZ15_POPTR Predicted protein OS=Populus trichocarpa GN=POPTRDRAFT_810417 PE=3 SV=1	AF1946_2	81.3	5e-17	COG4870	Cysteine protease	O	Posttranslational modification, protein turnover, chaperones ;	K16290|1|0.0|606|tcc:TCM_007588|EC[not_get]	cellular_process metabolic_process single-organism_process	cell cell_part organelle	catalytic_activity
275	Cotton_D_gene_10019028	locus=scaffold36:219428:222620:+ [translate_table: standard]	70010.5	0.008	1|-|-	1|-|-	-/-/-	Cotton_D_gene_10019028	MYRKSYQTLSSNAKDKGNYFQWSSAMDCCLAKLLAEQIRKGNKTDNGLNPVAYMGALAVINKKFGLDLTKEHLMNRLKTWEKQFGILKELLAQSGFKWDEKQRMVVADACVWKDYTMAHPDARQFQERPIDNYEELCIIIGNDQAIVGCLENVEETYMQSAASGDGLDAASSSDIHGDDNHVRNLRWTDAMDYYLGKSLVEKVKEGHKMGNALPWEAYDTVLSTLNEKIGFVLTKDHIRNRLKTWKKQYGTLRDLLSHPGFKWDRTWKMIIADDSVWTNYVKAWKKGKSIAFDDIHNKGVSSLVNASTLTQEENAKTLCIRLHVFLRKLLIAIQETFPVLFLCQFAHPEARTFRGRVIENYDNLCTIFANDNDVAEAVDISPVQNSMKVKDQVKNMRWT…	27.55	2e-57	gi|462418888|gb|EMJ23151.1|	hypothetical protein PRUPE_ppa001711mg [Prunus persica]	27.92	1e-10	sp|O82368|Y2988_ARATH	Uncharacterized protein At2g29880 OS=Arabidopsis thaliana GN=At2g29880 PE=2 SV=1	44.71	4e-158	I1KML0	I1KML0_SOYBN Uncharacterized protein OS=Glycine max GN=Gma.41941 PE=4 SV=1	-	-	-	-	-	-	-	K06662|1|9e-15|81.6|vvi:100255852|EC[not_get]	-	-	-
276	CotAD_61921	locus=At_chr10:78292336:78294456:+ [translate_table: standard]	24008.1	0.074	-|1|1	-|1|1	-/CotAD_65673;Cotton_D_gene_10026349/CotAD_65673;Cotton_D_gene_10026349	CotAD_61921	MEDEKARSKFKRLCVFCGSNSGHRQVFSDAALELGNELVKRKIDLVYGGGSVGLMGLISKTVYDGGCHVLGIIPKALMPLEISGETVGEVRTVLDMHERKAAMARESDAFVALPGGYGTMEELLEMITWSQLGIHKKTVGLLNVDGYYNNLLALFDNGVKEGFIKPSARHIIVSAPTAKELMVKMEQYTPCHEHVAPQESWQMEQLGDYPNQLNAQ	85.24	3e-136	gi|255550077|ref|XP_002516089.1|	carboxy-lyase, putative [Ricinus communis]	82.24	5e-132	sp|Q84MC2|LOG8_ARATH	Cytokinin riboside 5'-monophosphate phosphoribohydrolase LOG8 OS=Arabidopsis thaliana GN=LOG8 PE=1 SV=1	85.24	4e-135	B9RQS0	B9RQS0_RICCO Carboxy-lyase, putative OS=Ricinus communis GN=RCOM_0706020 PE=4 SV=1	NMB0283	52.4	7e-08	COG1611	Predicted Rossmann fold nucleotide-binding protein	R	General function prediction only ;	K06966|1|4e-149|416|tcc:TCM_037315|EC[not_get]		cell cell_part organelle	catalytic_activity
277	Cotton_D_gene_10015660	locus=scaffold85:1642648:1643478:+ [translate_table: standard]	18133.1	0.194	1|-|1	1|-|1	-/-/-	Cotton_D_gene_10015660	MLTPSVDIDNKKFDIAKNFGVTEFVNPKDYDKPIQQVLVDLTDGGVDYSFECIGNVSVMRAALECCHKGWGTSVIIGVAASGQEISTRPFQLVTGRVWKGTAFGGFKSRSQVPWLVDKYMKKEIKIDEYITHNLTLGEINKAFDLMHEGGCLRCVLKMHE	94.16	9e-109	gi|297744241|emb|CBI37211.3|	unnamed protein product [Vitis vinifera]	85.81	8e-100	sp|P80572|ADHX_PEA	Alcohol dehydrogenase class-3 OS=Pisum sativum PE=1 SV=1	94.16	1e-107	D7U394	D7U394_VITVI Putative uncharacterized protein OS=Vitis vinifera GN=VIT_07s0005g04600 PE=4 SV=1	SMc01270	178	5e-55	COG1062	Zn-dependent alcohol dehydrogenases, class III	C	Energy production and conversion ;	K00121|1|8e-110|320|tcc:TCM_003851|EC[not_get]	metabolic_process single-organism_process		binding catalytic_activity
278	Cotton_D_gene_10021932	locus=scaffold51:34212:37036:+ [translate_table: standard]	52984.2	0.072	1|1|1	3|7|3	-/CotAD_66142/-	Cotton_D_gene_10021932	GVGRVVSGYSTSAGIENPINPSIKVHCTQLLINGNFVDSASGKTFPTYDPRTGNVIAHVAEGDAEDIDRAVCAARKAFDEGPWPKMTAYERSKVLFRFADLLDKHIEELATLETWDNGKPYEQSAKIELPMISRIIRYYAGWADKIHGLTIPADGPHLVQTIHEPIGVAGQIIPWNFPLLMFAWKVGPALACGCTIVLKSAEQTPFHSEWELFPEAGLPPGVLNVVSGFGPTAGAALASHMDVDKLAFTGSSETGKIVLELASKSNLKPVTLELGGKSPFIVCKDADVDKAVELAHFALFFNQRKARALKRSVGDPFKAGVEQGPQIDSEQFEKILRYIRSGIESGATLITGGDRLGSKGFYIQPTVFTNVKEDMLISQDEIFGPVQSILKFRYMDEVI…	76.18	0	gi|356526813|ref|XP_003532011.1|	PREDICTED: aldehyde dehydrogenase family 2 member B4, mitochondrial-like [Glycine max]	74.35	0	sp|Q9SU63|AL2B4_ARATH	Aldehyde dehydrogenase family 2 member B4, mitochondrial OS=Arabidopsis thaliana GN=ALDH2B4 PE=1 SV=1	76.18	0	I1KXG9	I1KXG9_SOYBN Uncharacterized protein OS=Glycine max PE=4 SV=1	AGc4041	325	4e-105	COG1012	NAD-dependent aldehyde dehydrogenases	C	Energy production and conversion ;	K00128|1|0.0|840|tcc:TCM_010250|EC[not_get]	metabolic_process		catalytic_activity
279	CotAD_22466	locus=At_chr11:90915834:90916508:+ [translate_table: standard]	24897.5	0.29	3|2|-	5|2|-	-/-/-	CotAD_22466	MKTTTVSVFLLFIIFSITPSSFLFGVANATNEPVLDIDGNEVQTGTPYYVVSSIWGAGGGGLSLGMPSRKKCPEVVAQRGSGDDGIPVIFSNSDSNDGVVRLSTDINIEFIPLRPRLCQTTTVWKVDDYDHSAGKWWVITDGVKGNPGANTLTSWFRIEKVNDLDYKFKYCPAVCGTCPALCNEIVRDSDGEMIRLALSTGHGWPFYFKKAKKLAREIQQVVHV	61.78	2e-87	gi|55139090|gb|AAV41233.1|	putative 21 kDa trypsin inhibitor [Theobroma bicolor]	59.56	3e-80	sp|P32765|ASP_THECC	21 kDa seed protein OS=Theobroma cacao GN=ASP PE=2 SV=1	61.78	2e-86	Q3BD85	Q3BD85_9ROSI Putative 21 kDa trypsin inhibitor OS=Theobroma bicolor PE=4 SV=1	-	-	-	-	-	-	-	-	-	-	-
280	Cotton_D_gene_10011548	locus=scaffold138:792613:794022:+ [translate_table: standard]	50590.7	0.017	-|1|-	-|2|-	-/CotAD_22274;CotAD_29058/-	Cotton_D_gene_10011548	MEQQSPPASSSTTVTSTTPLLPQNHPWWHRHFHMNNSLSSELSGAVGDLGTFIPIVLTLTLVSHLDLSTTLIFTALYNITTGLLFHIPMPVQPMKSIAAVAVSETPHLTTSQIATAGASTAAVLFFLGATGLMSTLYRLLPLPVVRGIQLSQGLSFAFSAIKYIRYNQDFVASKATTPRAWLGLDGLVVALSSLLFLVIFTGSGDHYDRNGSDDDQPRRRNSKRLRILGSIPAALIVFLLGLVLCFIRDPSIFGDIKFGPSKIGFLSITWNDWKVGFLKGAVPQIPLSVLNSVIAVCKLSGDLFPDRELSAAKVSVSVGVMNLVGCWFGAMPVCHGAGGLAGQYRFGARSGWSVVYLGIGKLIIGLVFGNSFVRILNQFPIGILGVLLLFAGIELAMAS…	78.29	0	gi|255553015|ref|XP_002517550.1|	sulfate transporter, putative [Ricinus communis]	71.77	0	sp|Q0WP36|MOT2_ARATH	Molybdate transporter 2 OS=Arabidopsis thaliana GN=MOT2 PE=1 SV=2	78.29	0	B9RUY1	B9RUY1_RICCO Sulfate transporter, putative OS=Ricinus communis GN=RCOM_0896860 PE=4 SV=1	-	-	-	-	-	-	-	-	localization	cell cell_part membrane membrane_part organelle
281	CotAD_62124	locus=At_chr12:45049239:45052777:- [translate_table: standard]	52661.5	0.234	1|-|-	2|-|-	-/-/-	CotAD_62124	MTWRIRSRSSQRSHPLPPYPSTTETKLLPAQRARADTSRRYLKNPKKPPKGMALLQLHHLSLHSLPFTPKLHHSRFSTRKSLRFSFSASASTTMAKQVLVPVANGTEPMEAVITIDVLRRSGAEVMVASVEKELRVDACHGVKIVADALVGDCKDTGFDLIALPGGMPGATNFKDCAVLESVVKKQAADGRLYAAVCASPAVALGSWGLLKGLKATCYPSFMEQLSSCATAVESIVQQDGKVVTSRGPGTTMEFSVALVEQLYDKEKADEVSGPLLLRPNHGDEYKVIELNPMEWKCNNIPQILVPIADGSEEMEAVMIIDILRRAKANVVVASVGDNLEILASRKVKLVADMLLDEAAKLSYDLIVLPGGLGGAQAFANSDKLVNMLKKQAESNKPYG…	81.4	0	gi|302142910|emb|CBI20205.3|	unnamed protein product [Vitis vinifera]	70.24	0	sp|Q9MAH3|DJ1B_ARATH	-	81.61	0	F6H2P8	F6H2P8_VITVI Putative uncharacterized protein OS=Vitis vinifera GN=VIT_19s0014g01520 PE=4 SV=1	PH1704	66.6	2e-12	COG0693	Putative intracellular protease/amidase	R	General function prediction only ;	K03152|1|0.0|749|tcc:TCM_031744|EC[not_get]	-	-	-
282	CotAD_15891	locus=Dt_chr12:1406810:1408994:- [translate_table: standard]	28723	0.158	-|1|1	-|1|1	-/-/-	CotAD_15891	MALFICFLSLLLFSSATACDRCLYQSKAAYFSKANALSSGACGYGSLALGLSGGHLAAGVSSLYKDGAGCGACFQIRCNNSTLCSSKGTNVTITDINHNNQTGFVLSTRAFMAMANHGMGQHILKLGTVEVEYKRIPCEYKNQNLAVRVEESSQKPNYLAIKLLYQGGQTEIVAIDVAQVGSSNWNFMKRNHGAVWDTSRAPNGALQFRFVVTSGYDGKWIWAKTVLPADWKSGVVYDSGVQINDIAKEGCFHCDYSHW	80.33	1e-129	gi|255587002|ref|XP_002534094.1|	Beta-expansin 1a precursor, putative [Ricinus communis]	65.85	1e-96	sp|Q9SVE5|EXLA2_ARATH	Expansin-like A2 OS=Arabidopsis thaliana GN=EXLA2 PE=2 SV=1	80.33	2e-128	B9T775	B9T775_RICCO Beta-expansin 1a, putative OS=Ricinus communis GN=RCOM_0235100 PE=3 SV=1	-	-	-	-	-	-	-	-	reproduction
283	Cotton_D_gene_10024876	locus=scaffold16:42454:48290:- [translate_table: standard]	169545	0.008	-|-|1	-|-|1	-/-/CotAD_73091	Cotton_D_gene_10024876	MTVDEVMAVHAVEEEMAASSSSKVETVVKEDHGKENEKEDSNGTNGKTVREDTDGDGDYVFVNGNEAENGDLVESDLDKNGNGIGVEDQGFESLETKGEVKSKFDLVEKDESCIGIVDQDKESVELCHVKAPVDEQKSGDLVEGGPVSATNAGMADQNGISELTEDVFVDKNIVKHTVSEAAVVDSSARQSDEISPVPGPDGNGSANDSALDFRSKENEGSEIAVADDGDCSGDGLVNDSVEAPVSEADVLDFRSKESEGSEMTVADDGDCSGDGLVNDSIEAPVSEANVLYFRSKENGGSEMAVAGDGDFNGDGFVNDSVEATVSEDTVLDFRSKDNEDSEMAVADDGDCNGDGLANDNAKATVCEASVINSRSKENEGSEITVADDGDCNGDSLAND…	64.98	5e-102	gi|462406161|gb|EMJ11625.1|	hypothetical protein PRUPE_ppa000354mg [Prunus persica]	24.28	2e-16	sp|O23144|PPI1_ARATH	-	59.64	1e-99	D7UDH2	D7UDH2_VITVI Putative uncharacterized protein OS=Vitis vinifera GN=VIT_18s0122g00410 PE=4 SV=1	-	-	-	-	-	-	-	-	-	-	-
284	CotAD_41010	locus=At_chr9:52274501:52275397:- [translate_table: standard]	17035.8	0.312	5|3|3	11|7|12	CotAD_00087/CotAD_00087/CotAD_00087	CotAD_41010	MVRRTTEAKEILVGGKTDAWKIPSSESDSLNRWAEKSRFRIGDSLVWKYDGGKDSVLQVTKEAYASCNTSNSIAEYKDGNTKVKLDRSGPFYFISGAKGHCEQGQKLHVVVLSQKHRYTGISPAPSLAEIDGPAIAPTSSAAGLKAGFLVTLGVVVF	79.19	2e-87	gi|115393868|gb|ABI96983.1|	phytocyanin-like arabinogalactan-protein [Gossypium hirsutum]	59.6	2e-58	sp|Q9SK27|ENL1_ARATH	Early nodulin-like protein 1 OS=Arabidopsis thaliana GN=At2g25060 PE=1 SV=2	79.19	2e-86	A7J385	A7J385_GOSHI Phytocyanin-like arabinogalactan-protein (Precursor) OS=Gossypium hirsutum GN=PLA1 PE=2 SV=1	-	-	-	-	-	-	-	-			binding
285	Cotton_D_gene_10033056	locus=scaffold28:3004390:3007062:+ [translate_table: standard]	102949	0.012	-|-|1	-|-|1	-/-/CotAD_37221;CotAD_03812	Cotton_D_gene_10033056	MAEAALSFVVERLPDILEEIDFHTDVRKHVERLQEELVRMRCFLKDAEAKQDDDERVRNWVSDIRNVAYDAEDLIDTFLLRMESLKKNNFFKRSASVFKEWKHRSNIANELLQIQGRIANISASRETYGIRNIGEGISTARERLRKLRRSSPRGEEKDIVGLDEDIDKLVKQLVKTDDQWHAISIVGMGGIGKTTLAKKVYNHGDIQARFPSRAWVYVSQEFSRKDLLEAIIKQVGSPRRKLESFGEEELEGILFEHLRRKRYLVVLDDVWSTEAWNSIAKAFPDRSNGSRVMLTTRNKGIALKADAQSIPYHLNFLSEEDGWMLFCKKAFIHNNDSYGSPQLEETGKEIVAKCAGLPLALIVVGGLLSTKKNLGEWKRVLSNMHSLFARDADGVSAIL…	61.9	0	gi|224096480|ref|XP_002334697.1|	nbs-lrr resistance protein [Populus trichocarpa]	33.33	5e-130	sp|P0C8S1|RP8L2_ARATH	Probable disease resistance RPP8-like protein 2 OS=Arabidopsis thaliana GN=RPP8L2 PE=1 SV=1	61.9	0	B9NHG2	B9NHG2_POPTR Nbs-lrr resistance protein OS=Populus trichocarpa GN=POPTRDRAFT_791093 PE=4 SV=1	RSp0875	52.8	3e-06	COG4886	Leucine-rich repeat (LRR) protein	S	Function unknown ;	K13457|1|0.0|1431|tcc:TCM_047010|EC[not_get]			binding
286	Cotton_D_gene_10007506	locus=scaffold284:346664:350134:+ [translate_table: standard]	38562.3	0.023	1|1|-	1|1|-	CotAD_56528;CotAD_47717;Cotton_D_gene_10016863;CotAD_32456;CotAD_28436/CotAD_56528;CotAD_47717;Cotton_D_gene_10016863;CotAD_32456;CotAD_28436/-	Cotton_D_gene_10007506	MASEDVKRSESAVSTIVNLAEEAKIASEGVKAPSHALLSICKSLVAGGVAGGVSRSAVAPLERLKILLQVQNPHSIKYNGTIQGLKYIWRTEGFRGMFKGNGTNCARIIPNSAVKFFSYEEASKGILYLYRQQSGNEDAQLTPLLRLGAGACAGIIAMSATYPMDMVRGRLTVQTEKSPHQYRGIFHALSTVLREEGPRALYKGWLPSVIGVVPYVGLNFAVYESLKDWLIKRKPLGLVEDSELGVTTRLACGAAAGTIGQTVAYPLDVIRRRMQMVGWKDAASVVTGDGKNKAPIEYNGMVDTFRKTVRYEGFGALYKGLVPNSVKVVPSIAIAFVTYELVKDVLGVELRISD	91.24	0	gi|224130494|ref|XP_002320851.1|	predicted protein [Populus trichocarpa]	83.38	0	sp|O04619|ADNT1_ARATH	-	91.24	0	B9I8V0	B9I8V0_POPTR Predicted protein OS=Populus trichocarpa GN=POPTRDRAFT_731263 PE=3 SV=1	-	-	-	-	-	-	-	K14684|1|0.0|651|pop:POPTR_0014s09110g|EC[not_get]	localization	cell cell_part membrane membrane_part organelle organelle_part
287	CotAD_48484	locus=Dt_chr11:2370808:2371449:- [translate_table: standard]	17301	0.21	-|1|-	-|1|-	-/Cotton_D_gene_10011373;CotAD_43620/-	CotAD_48484	MEEDAILQKSLKWLRDLSKGNISHELEALTLEGLQIVHAQKGSIHCNFIVPTRASDPDGNWHVGAMATLIDDVAATAIYSVVDHVKLSLDFSISFYSTAKIQEEVEIEAKVIGEKGRLTQVVVEVTRKGNTELIALGKQWMASDKKGMKPSQVSSKL	65.03	7e-65	gi|255549930|ref|XP_002516016.1|	acyl-CoA thioesterase, putative [Ricinus communis]	28.97	2e-07	sp|Q5R833|ACO13_PONAB	Acyl-coenzyme A thioesterase 13 OS=Pongo abelii GN=ACOT13 PE=2 SV=1	65.03	9e-64	B9RQJ7	B9RQJ7_RICCO Acyl-CoA thioesterase, putative OS=Ricinus communis GN=RCOM_1493490 PE=4 SV=1	-	-	-	-	-	-	-	K17362|1|7e-78|233|tcc:TCM_028791|EC[not_get]	-	-	-
288	CotAD_56577	locus=Dt_chr9:18305983:18308978:+ [translate_table: standard]	94920.8	0.249	-|1|-	-|2|-	-/Cotton_D_gene_10004494/-	CotAD_56577	MVKFTAEELRAIMDRKHNIRNMSVIAHVDHGKSTLTDSLVAAAGIIAQEVAGDVRMTDTRADEAERGITIKSTGISLYYEMSDDSLKSYKGERQGNEYLINLIDSPGHVDFSSEVTAALRITDGALVVVDCIEGVCVQTETVLRQALGERIRPVLTVNKMDRCFLELQVDGEEAYQTFQRVIENANVIMATYEDPLLGDVQVYPEKGTVAFSAGLHGWAFTLTNFAKMYASKFGVDESKMMERLWGENFFDPATRKWTTKNTGTATCKRGFVQFCYEPIKQIINTCMNDQKDKLWPMLQKLGVTMKSEEKDLMGKALMKRVMQTWLPASSALLEMMIFHLPSPSVAQKYRVENLYEGPLDDVYANAIRNCDPEGPLMLYVSKMIPASDKGRFFAFGRVF…	95.97	0	gi|356525774|ref|XP_003531498.1|	PREDICTED: elongation factor 2-like [Glycine max]	92.41	0	sp|O23755|EF2_BETVU	Elongation factor 2 OS=Beta vulgaris PE=2 SV=1	95.97	0	I1KU21	I1KU21_SOYBN Uncharacterized protein OS=Glycine max GN=Gma.38528 PE=4 SV=1	SPCC553.08c	277	5e-79	COG0480	Translation elongation factors (GTPases)	J	Translation, ribosomal structure and biogenesis ;	K03234|1|0.0|1708|tcc:TCM_032400|EC[not_get]	cellular_process metabolic_process single-organism_process		binding catalytic_activity
289	Cotton_D_gene_10025613	locus=scaffold124:2573688:2575622:+ [translate_table: standard]	40087.6	0.233	-|-|1	-|-|1	-/-/-	Cotton_D_gene_10025613	MATTRRSLPLLRTLVAGKTQTRPVTYMPRPGDGAPRPVTLIPGDGIGPLVTNAVEQVMEAMHAPVYFEKYDVHGDMKRVPQEVLDSIKKNKVCLKGGLRTPMGGGVSSLNMQLRKELDLYASLVNCCNLPGLPTRHEDVDIVVIRENTEGEYSGLEHEVVPGVVESLKVITKFCSERIAKYAFEYAYLNNRKKVTAVHKANIMKLADGLFLESCREVATKYPSIKYNEIIVDNCCMQLVSKPEQFDVMVTPNLYGNLVANTAAGIAGGTGVMPGGNVGAEYAVFEQGASAGNVGKEKIVEQKTANPVALLLSSAMMLRHLQFPSFADRLESAVKRVISEGQYRTKDLGGQSSTQEVVDAVIAKLD	92.77	0	gi|462395307|gb|EMJ01106.1|	hypothetical protein PRUPE_ppa007307mg [Prunus persica]	90.17	0	sp|Q8LFC0|IDH1_ARATH	Isocitrate dehydrogenase [NAD] regulatory subunit 1, mitochondrial OS=Arabidopsis thaliana GN=IDH1 PE=1 SV=2	93.02	0	B9SRZ2	B9SRZ2_RICCO Isocitrate dehydrogenase, putative OS=Ricinus communis GN=RCOM_0519460 PE=3 SV=1	MA4265	177	5e-52	COG0473	Isocitrate/isopropylmalate dehydrogenase	CE	Energy production and conversion ; Amino acid transport and metabolism ;	K00030|1|0.0|633|tcc:TCM_006462|EC[not_get]	cellular_process metabolic_process single-organism_process		binding catalytic_activity
290	CotAD_21917	locus=Dt_chr11:60166225:60170153:- [translate_table: standard]	70275.8	0.073	1|-|1	1|-|2	Cotton_D_gene_10023419/-/Cotton_D_gene_10023419	CotAD_21917	MGTKWKNVFFVFWLLSSTAQSFYLPGVAPRDFQRGDPLYVKVNKLSSTKTQLPYDHYYLDYCKPAKIVNSAENLGEVLRGDRIENSVYTFEMREDQPCKVVCRKKLDAESAKNFKEKIDDEYRVNMILDNLPVAVLRQRRDGSQSTTYEHGFRVGFKGNYAGSKEEKYFINNHLSLRVMFHRDTETDAARIVGFEVTPNSINHEYKEWDEKNPQIATCNKDTKNLIPGSTVPQEVDAGKEVVFTYDITFKESDIKWASRWDTYLLMNDDQIHWFSILETQDEAQEETGWKLVHGDIFRAPINYGLLCVYVGTGVQVFSMTLVTMIFALLGFLSPSNRGGLMTAMVLLWVFMGIFAGYSSARLYKMFKGTEWKRNTLKTAFMFPGILFVVFFVLNALIWG…	86.19	0	gi|255572953|ref|XP_002527407.1|	Endosomal P24A protein precursor, putative [Ricinus communis]	46.54	0	sp|Q4KLL4|TM9S4_RAT	Transmembrane 9 superfamily member 4 OS=Rattus norvegicus GN=Tm9sf4 PE=2 SV=1	86.19	0	B9SN38	B9SN38_RICCO Endosomal P24A protein, putative OS=Ricinus communis GN=RCOM_0312330 PE=4 SV=1	-	-	-	-	-	-	-	K17086|1|0.0|1094|tcc:TCM_029034|EC[not_get]	biological_regulation cellular_process single-organism_process	cell cell_part membrane membrane_part organelle organelle_part
291	CotAD_00043	locus=Dt_chr9:64143844:64147458:+ [translate_table: standard]	106889	0.124	-|2|2	-|3|4	-/Cotton_D_gene_10000996/Cotton_D_gene_10000996	CotAD_00043	MEKSCNLLIHFDKGTPAIANEIKEALEGNDVPAKIDAMKKAIMLLLNGETLPQLFITIVRYVLPSEDHTVQKLLLLYLEIIEKTDTKGRVLPEMILICQNLRNNLQHPNEYIRGVTLRFLCRLNETEIIEPLIPSVLQNLEHRHPFIRRNAILAVMSIYKLPQGEQLLVDAPEMIEKVLSTEQDASAKRNAFLMLFTCAQDRAVNYLLTHVDRVSEWGELLQMVVLELIRKVCRTNRAEKGKYIKIIISLLNAPSTAVIYECAGTLVSLSSAPTAIRAAANTYCQLLLSQSDHNVKLIVLDRLNELKSSHRDIMVDLIMDVLRALSSPNLDIRRKTLDIVLELITPRNINEVVLMLKKEVMKTQSGELEKNGEYRQMLIQAIHSCAIKFPEVASTVVHL…	93.04	0	gi|225429750|ref|XP_002282410.1|	PREDICTED: coatomer subunit beta-1 [Vitis vinifera]	85.97	0	sp|Q9SV21|COPB1_ARATH	Coatomer subunit beta-1 OS=Arabidopsis thaliana GN=At4g31480 PE=1 SV=2	93.04	0	A5AHP0	A5AHP0_VITVI Coatomer subunit beta OS=Vitis vinifera GN=VIT_04s0008g02320 PE=3 SV=1	SPBC947.02	68.6	4e-11	COG5096	Vesicle coat complex, various subunits	U	Intracellular trafficking, secretion, and vesicular transport ;	K17301|1|0.0|1868|tcc:TCM_036827|EC[not_get]	localization	cell cell_part macromolecular_complex membrane membrane_part organelle organelle_part
292	CotAD_04769	locus=At_chr4:38059792:38063724:- [translate_table: standard]	78615.2	0.347	2|2|2	3|4|8	-/-/-	CotAD_04769	MTTSFGTTTGTLTPTDPKIRFQSFTGLKSSNSIALTRNLRVFPLPFCTPTRIRAVSTPLKPETSTAEPKRSKVEIFKEQSNFIRYPLNEEIYTDTPNINEASTQLIKFHGSYQQYNRDERGTRSYSFMLRTKNPGGKVPNQLYLTMDDLADQFGIGTLRLTTRQTFQLHGVLKKDLKTVMSTIIRNMGSTLGACGDLNRNVLAPAAPFMTKEYKFAQETAENIAALLTPQSGFYYDVWVDGEKFMTSEPPEVVKARNDNSHGTNFPDSPEPIYGTQFLPRKFKIAVTVPTDNSVDILTNDIGVVVVFDEDGEPQGFNIYVGGGMGRTHRQETTFPRLGEQLGYVPKGDILYAIKAIVATQRDHGRRDDRKYSRMKYLISSWGIEKFRNVVEQYYGKKFE…	84.27	0	gi|462409494|gb|EMJ14828.1|	hypothetical protein PRUPE_ppa001879mg [Prunus persica]	81.95	0	sp|O82802|SIR1_TOBAC	Sulfite reductase 1 [ferredoxin], chloroplastic OS=Nicotiana tabacum GN=SIR1 PE=1 SV=1	84.02	0	D7SL30	D7SL30_VITVI Putative uncharacterized protein OS=Vitis vinifera GN=VIT_06s0004g02330 PE=4 SV=1	alr0607	137	7e-34	COG0155	Sulfite reductase, beta subunit (hemoprotein)	P	Inorganic ion transport and metabolism ;	K00392|1|0.0|1280|tcc:TCM_040722|EC[not_get]	metabolic_process		binding catalytic_activity
293	CotAD_33789	locus=Dt_chr5:34172457:34174832:+ [translate_table: standard]	64880.1	0.114	2|-|1	2|-|1	Cotton_D_gene_10024203/-/Cotton_D_gene_10024203	CotAD_33789	MRRILLFLLLLAHLGELGAEDRLLNPSKLEMFVDELPDMPKIQGFRMLNTSPKPKSLMIGMFKKKWKFHRDLPPTPVFAYGASRRGATVPGPTIEALQGIDTYVTWKNFLPSKHILPWDPTIPTAIPATKTGIPTVVHLHGGMHEPANDGNANSWFTAGFKEKGPDWSKRTYRYNNNQQPGSLWYHDHAMGLTRVNLLAGLIGAYVIRHPEVEGPLELPHGEEFDRPLIVFDRSFRKDGSIYMNSTGNNPSIHPQWQPEYFGDLIIVNGKAWPKMTVRRRKYRLRIVNASNARFFRLFFTNGLEFIHVASDSTYLVEPVVTNETLLAPSEIADVVVDFSKSKTDEAVLANDAPYPYPSGDPVNELNGRVMKFTIKKEREVDTWRVPDKLIQYPSPDLSS…	77.41	0	gi|255580487|ref|XP_002531069.1|	spore coat protein, putative [Ricinus communis]	37.91	3e-103	sp|P07788|COTA_BACSU	Spore coat protein A OS=Bacillus subtilis (strain 168) GN=cotA PE=1 SV=4	77.41	0	B9SYK0	B9SYK0_RICCO Spore coat protein, putative OS=Ricinus communis GN=RCOM_1289060 PE=4 SV=1	PM0104	66.2	7e-11	COG2132	Putative multicopper oxidases	Q	Secondary metabolites biosynthesis, transport and catabolism ;	K05909|1|3e-09|63.2|zma:100191779|EC[not_get]	metabolic_process		binding catalytic_activity
294	CotAD_22076	locus=Dt_chr9:31629692:31631724:- [translate_table: standard]	33309.1	0.031	1|-|-	1|-|-	-/-/-	CotAD_22076	MTLLDPQNLSENQIDVIHIVGMGELGKTTIAQLIYDPRVDKWFDRKAWVCVSEEFDAFKLVSPFTSGAKNSKIIVTTHDENVAAIMSNILTYRLNVLSDDDCWKLFAKHAFDGSSPTKHPDLMAIGEAIVKRCGGLPLAAKALGGLLRCKPDADEWNKILHRNFWDIPNDVINILPALTLSYHYLPFHLKRCFAYCSIFPKDYEFKKEKLIQLWMAEGLLELPKDNGDLEELGTEYFKDLRLSDLDELLRGLERLLNMLYLDIKGTNLARMPEGMGHLGLSMIAGLRCKY	50.54	2e-69	gi|224053248|ref|XP_002297736.1|	cc-nbs-lrr resistance protein [Populus trichocarpa]	38.7	8e-52	sp|Q9LRR4|R13L1_ARATH	Putative disease resistance RPP13-like protein 1 OS=Arabidopsis thaliana GN=RPPL1 PE=2 SV=1	50.54	3e-68	B9GLY8	B9GLY8_POPTR Cc-nbs-lrr resistance protein (Fragment) OS=Populus trichocarpa GN=POPTRDRAFT_178418 PE=4 SV=1	-	-	-	-	-	-	-	K19613|1|2e-59|207|pmum:103343307|EC[not_get]!K15078|4|6e-53|189|rcu:RCOM_1122050|EC[not_get]	-	-	-
295	Cotton_D_gene_10026446	locus=scaffold147:1509578:1513063:+ [translate_table: standard]	43669.2	0.043	1|-|-	1|-|-	-/-/-	Cotton_D_gene_10026446	MEKDKSPGLLPTSGRFSGFSSSGIAPNNFNPKTETGTFGQTSENNHFSHDIRKMPDNPPKKLGHRRAHSEILTLPDDISFDSDTGIVGAADGPSYSDEAEEDLFSMYLDMDKFNSSSATSTCQVGESSEAAAPVAVPAKSGLSSGENISNGIASSMKPRVRHQHSQSMDGSTSIKPEMLMSGSEEVSPADSKKSMSAANLAELALIDPKRAKRVWANRQSAARSKERKMRYIAELERKVQTLQTEATSLSAQLTLVQRDTNGLTAENSELKLRLQAMEQQVHLQDALNDAMKEEIQHLKMLTVQPMPNGGGMMNFASFGASQQYYPNNHAKHTLLAAQQFQQLQLHSQKHQHQHQHQFAPNQLHHQQEQTGEMRARGSMPSPNQKDSSSDVNSTASKD	64.06	4e-169	gi|462419316|gb|EMJ23579.1|	hypothetical protein PRUPE_ppa005999mg [Prunus persica]	68.75	3e-135	sp|Q04088|POF21_ARATH	Probable transcription factor PosF21 OS=Arabidopsis thaliana GN=POSF21 PE=2 SV=1	69.25	1e-166	B9SU10	B9SU10_RICCO Transcription factor RF2a, putative OS=Ricinus communis GN=RCOM_0454610 PE=4 SV=1	-	-	-	-	-	-	-	K09060|1|2e-06|52.8|zma:100284069|EC[not_get]	cellular_process metabolic_process		binding
296	Cotton_D_gene_10017562	locus=scaffold197:755675:757497:+ [translate_table: standard]	49374.5	0.02	-|1|-	-|1|-	-/CotAD_68968;Cotton_D_gene_10012125;CotAD_16115;CotAD_60131;CotAD_57853;Cotton_D_gene_10030774/-	Cotton_D_gene_10017562	MVMVLINTNGVASRKVRVLDSFDDSAAGCSRKYSASLTDFGGVGDGVTSNTKAFQAAIDNLSLYASYGGSLLFVPPGKWLTGSFNLTSHFTLYLHKDATILASQDESEWAVINPLPSYGRGRDADGGRYISLIFGTNLTDVVITGDNGTFDGQGATWWDKFHKGELKYTRPYLIEIMYSQGVQISNLTLMNSPSWNVHPVYSSNVVVQGITILAPVTSPNTDGINPDSCTNTRIEDCYIVSGDDCIAVKSGWDEYGIKFGMPTKQLLIRRLTCISPFSAVIALGSEMSGGIEDVRAEDITGINSESAVRIKTAVGRGNYVKDIYVRRMTMKTMKMVFWMAGNYGSHPDNDYDPNAIPVIQNINFRDVVAENVTMAARLEGIPGHPFTGICISNATIELT…	80.32	0	gi|356513351|ref|XP_003525377.1|	PREDICTED: probable polygalacturonase-like [Glycine max]	74.65	0	sp|A7PZL3|PGLR_VITVI	Probable polygalacturonase OS=Vitis vinifera GN=GSVIVT00026920001 PE=1 SV=1	80.32	0	I1K6E9	I1K6E9_SOYBN Uncharacterized protein OS=Glycine max GN=Gma.26761 PE=4 SV=1	YJR153w	65.5	4e-11	COG5434	Endopolygalacturonase	M	Cell wall/membrane/envelope biogenesis ;	K01213|1|4e-26|112|egr:104420670|EC[not_get]!K01184|2|6e-25|109|eus:EUTSA_v10013641mg|EC[not_get]	cellular_component_organization_or_biogenesis cellular_process metabolic_process		catalytic_activity
297	CotAD_42283	locus=At_chr6:44874581:44878304:+ [translate_table: standard]	95230.2	0.193	1|1|1	2|2|1	-/-/-	CotAD_42283	MSVVGFDFGNESCIVAVARQRGIDVVLNDESKRETPAIVCFGEKQRFIGTAGAASSMMNPKNSISQIKRLIGRQFSDPELQRDIKSLPFNVTEGPDGYPLIHARYLGEMRTFTPTQVLGMVFSNLKSIAEQNLKAAVVDCCIGIPVYFTELQRRAVLDAATIAGLHPLRLIHETTATALAYGIYKTDLPENDQLNVAFVDIGHASMQVCIAGFKKGQLKILAHSFHRSLGGRDFDEVLFHHFSAKFKEEYKIDVSQNARACLRLRAACEKLKKVLSANPEAPLNIECLMDEKDVRGFIKREEFEQISAPILQCVKAPLEKALADAGLAVGDVHMVEVIGSASRIPSILKILTEFFGKEPRRTMNASECVGRGCALQCAILSPTFKVREFQVNESFPFPI…	81.68	0	gi|255574576|ref|XP_002528199.1|	Heat shock 70 kDa protein, putative [Ricinus communis]	81.55	0	sp|F4HQD4|HSP7P_ARATH	Heat shock 70 kDa protein 15 OS=Arabidopsis thaliana GN=HSP70-15 PE=1 SV=1	81.68	0	B9SQC9	B9SQC9_RICCO Heat shock 70 kDa protein, putative OS=Ricinus communis GN=RCOM_0980870 PE=3 SV=1	SMc02857	224	1e-62	COG0443	Molecular chaperone	O	Posttranslational modification, protein turnover, chaperones ;	K09489|1|0.0|1462|tcc:TCM_028691|EC[not_get]	metabolic_process response_to_stimulus		binding catalytic_activity
298	CotAD_29150	locus=Dt_chr2:43055714:43067858:+ [translate_table: standard]	141801	0.023	2|2|3	2|3|5	Cotton_D_gene_10035220;CotAD_71897/Cotton_D_gene_10035220;CotAD_71897/Cotton_D_gene_10035220;CotAD_71897	CotAD_29150	MSRQRHSEGYCAMYDICGERSDGKVVNCPYGSPAVKPDELLSSKIQSLCPTITGNVCCTKAQFDTLQSQVQQAIPFLVGCPACLRNFLNLFCELTCSPNQSLFINVTSISKIKNNSTVDGIDFFITDDFGEGLYESCKDVKFGTMNTRALEFIGAGAKNFKEWFAFIGRRAPNNMPGSPYAIQFLPTVPESSGMKPMNVSTYSCRDVSLGCSCGDCPSSPVCSNTAISTSNKAATCSVQIGSLKAKCVDLALAILYIVLVSMFFGWGVFHQTRKRSRSFRMKPFTDAAEGGESHSLSRQKADNLPMQRLEDANQSSTGVQLSVVQGYMSDFYRKYGLWVARHPTLVLSLSVGMVLVLCLGLVRFKVETRPEKLWVGPGSKAAEEKRFFDSNLAPFYRIE…	82.53	0	gi|359491908|ref|XP_002272383.2|	PREDICTED: niemann-Pick C1 protein-like [Vitis vinifera]	36.47	0	sp|P56941|NPC1_PIG	Niemann-Pick C1 protein OS=Sus scrofa GN=NPC1 PE=2 SV=1	82.7	0	D7UDA3	D7UDA3_VITVI Putative uncharacterized protein OS=Vitis vinifera GN=VIT_18s0122g01280 PE=4 SV=1	-	-	-	-	-	-	-	K12385|1|0.0|2024|tcc:TCM_034394|EC[not_get]	localization single-organism_process	membrane membrane_part	molecular_transducer_activity receptor_activity
299	CotAD_00947	locus=scaffold26.1:3109356:3118065:- [translate_table: standard]	51994.3	0.026	-|1|-	-|1|-	-/CotAD_15215;Cotton_D_gene_10031131/-	CotAD_00947	MARIRSSSSSSKFRYCNPSYYLKRPKRLALLLILFVSASSFVWDRQTLVREHEFEVSKLNDEVRRLQNMLEEFTNRVPANVPIEMQRRDKVKEAMIHAWSAYEKYAWGNDELLPQTQSGENSFGGLGATIIDSLDTLLIMGLDEQFQKAREWVANTLDFNKTYDASVFETTIRVVGGLLSTYDLSGDNIFLEKARDIADRLLPAWDTPSGIPYNIINLARGNAHNPGWTGGKSILADSGTEQLEFIALSQRTGDPKYQEKMDELACFAPGMLALGSSGYGKVEAKKILSLAEELAWTCYNFYQSTQTKLAGENYLFNPGRDMSVGTTWNILRPETVESLFYLWRLTGNVTYQEWGWNIFQAFEKNCRIESGYVGLTDVNLALKDNKMQTFFLAETLKYL…	75.45	4e-140	gi|224097450|ref|XP_002310939.1|	predicted protein [Populus trichocarpa]	70.91	1e-122	sp|Q9C512|MNS1_ARATH	Mannosyl-oligosaccharide 1,2-alpha-mannosidase MNS1 OS=Arabidopsis thaliana GN=MNS1 PE=1 SV=1	75.45	5e-139	B9HK55	B9HK55_POPTR Predicted protein (Fragment) OS=Populus trichocarpa GN=POPTRDRAFT_655661 PE=4 SV=1	-	-	-	-	-	-	-	K01230|1|3e-151|444|tcc:TCM_027862|EC[not_get]		cell cell_part	binding catalytic_activity
300	Cotton_D_gene_10027123	locus=scaffold73:818160:822571:+ [translate_table: standard]	55910.6	0.012	-|-|1	-|-|1	-/-/-	Cotton_D_gene_10027123	MEQKDSPTLVDKSFPLFSKPRRAKPSEAPKPSQNPIPQTPQLEKFSSSSAAADATSISAFSDLGLAEWAIQTCKELGMRKPTPVQTHCIPKILAGCDVLGIAQTGSGKTAAFALPILNRLAEDPYGVFALVITPTRELAFQLAEQFRALGSCLHLRCSVVVGGMDMITQAKALVSRPHVVVATPGRVKVLLEENPDIPKVFQGTKFLVLDEADRVLDVGFEEELRVIFQCLPKTRQTLLFSATMTSNLQTLLELSANKAYFYEAYEGFRTVETLKQQYVFIPKTVKDAYLVHILSKMEDMNIRSAMIFASRCRDCHLLSLLLEELEVEAAALHSLKSQALRLSAVQHFKSGRVSILLATDVASRGLDIPTVDLVINYDLPRYPRDYVHRVGRTARAGRG…	77.22	0	gi|359494643|ref|XP_002263207.2|	PREDICTED: DEAD-box ATP-dependent RNA helicase 36-like [Vitis vinifera]	74.76	0	sp|Q9SA27|RH36_ARATH	DEAD-box ATP-dependent RNA helicase 36 OS=Arabidopsis thaliana GN=RH36 PE=2 SV=1	77.22	0	D7T0V5	D7T0V5_VITVI Putative uncharacterized protein OS=Vitis vinifera GN=VIT_19s0085g00510 PE=3 SV=1	VCA0768	235	8e-72	COG0513	Superfamily II DNA and RNA helicases	LKJ	Replication, recombination and repair ; Transcription ; Translation, ribosomal structure and biogenesis ;	K14778|1|0.0|718|tcc:TCM_033434|EC[not_get]			binding catalytic_activity
301	Cotton_D_gene_10034082	locus=scaffold4:4123787:4125871:+ [translate_table: standard]	77225.2	0.086	3|-|-	4|-|-	CotAD_50547/-/-	Cotton_D_gene_10034082	MANPIKGKSYLFLFLFIFTSPPFPVVFAGSNSVPIENEHRHDRIPHHEPDPNSPHDFIPQEVLLHKLEELVRNLSEIVSRLESKISESPDFGKKDQISEQKYGVADGEKGRAVSVTKYSPFWSERFQFMSAVKLDSDATCINVLPFRDYEGLSKYVAVGDEKGRVYVFLRNGDVVVEFYTKNESPITAMVSYMSVYKNESVVITGHQNGVILVHRIYEGLNGEESGSPVMETVGKFVAAESGEDGFPITALEVHHVGRMRYILSADLSGKIRVFKENGSLYGSVMPTSRPLAFLKQRLLFLTETGAGSLDLRSMKIKESECEGLNHSLARNYVFDATERSKAYGFTSDGDLIHVLLLGDSMNFKCRVRSKKKLEMNEPLAFLAIKGYLLIVDLEKIFVY…	66.82	0	gi|255538592|ref|XP_002510361.1|	conserved hypothetical protein [Ricinus communis]	62.15	0	sp|Q9FRK5|Y1514_ARATH	Uncharacterized membrane protein At1g75140 OS=Arabidopsis thaliana GN=At1g75140 PE=1 SV=3	66.82	0	B9R7R8	B9R7R8_RICCO Putative uncharacterized protein OS=Ricinus communis GN=RCOM_1593900 PE=4 SV=1	-	-	-	-	-	-	-	-	-	-	-
302	CotAD_08913	locus=scaffold280.1:570022:574505:- [translate_table: standard]	29586	0.288	1|-|-	1|-|-	-/-/-	CotAD_08913	MSSLFLLLLSTAITAAVASIPAYPSVSTDCTVSAEDDNPVPVRREVYGDGRIFDVSHRYTVDMPSWGSKDGLGQFLWLPSSMKNGSRSNNSLMKLQSVHSGTHVDAPGHMVDSYFDAGFDVDTLDLDVLNGPALLVDVPRDSNITAKVMESLNIPKGVRRVLFRTLNTDRRLMFKKEFDSSYVGFTTDGARWLAKNTDIKLVGIDFLSAACYDHSVPAHLEFFEGREIILVEGLKLDNVPVGIYNVHCLPLRLLGSEGSPIRCILIK	74.6	4e-137	gi|255555311|ref|XP_002518692.1|	conserved hypothetical protein [Ricinus communis]	31.78	1e-17	sp|Q81CK1|KYNB_BACCR	Kynurenine formamidase OS=Bacillus cereus (strain ATCC 14579 / DSM 31) GN=kynB PE=1 SV=1	74.6	6e-136	B9RYA8	B9RYA8_RICCO Putative uncharacterized protein OS=Ricinus communis GN=RCOM_0811620 PE=4 SV=1	PA2081	54.7	2e-08	COG1878	Predicted metal-dependent hydrolase	R	General function prediction only ;	-	-	-	-
303	CotAD_45848	locus=scaffold845.1:690340:694901:- [translate_table: standard]	73845.7	0.112	2|1|1	4|1|1	Cotton_D_gene_10023281;CotAD_41718/-/-	CotAD_45848	MGTKSKTQFFAFLLLLSTAHSFYLPGVAPRDLQRGDPLYVKVNKLSSTKTQLPYDYYYLKYCKPSKIVNNAENLGEVLRGDRIENSVYTFEMREDQPCKVVCRIKLDADSAKNFKEKIDDEYRVNMILDNLPVAVRRQRRDGSQSTTYEHGFRVGFKGNYAGSKEEKYFINNHLSFRVMFHRDTETDAARIVGFEVTPNSINHEYKEWDEKNPQVTTCNKDTKNLIQGSTVPQEVDAGKEVVFTYDVTFKESDIKWASRWDTYLLMNDDQIHWFSIINSLMIVLFLSGMVAMIMMRTLYKDIANYNQLETQDEAQEETGWKLVHGDVFRPPINYGLLCVYVGTGVQIFAMSLVTMIFALLGFLSPSNRGGLMTAMVLLWVFMGIFAGYSSSRLYKMFKG…	92.23	0	gi|255572953|ref|XP_002527407.1|	Endosomal P24A protein precursor, putative [Ricinus communis]	51.16	0	sp|Q4KLL4|TM9S4_RAT	Transmembrane 9 superfamily member 4 OS=Rattus norvegicus GN=Tm9sf4 PE=2 SV=1	92.23	0	B9SN38	B9SN38_RICCO Endosomal P24A protein, putative OS=Ricinus communis GN=RCOM_0312330 PE=4 SV=1	-	-	-	-	-	-	-	K17086|1|0.0|1176|tcc:TCM_029034|EC[not_get]	biological_regulation cellular_process single-organism_process	cell cell_part membrane membrane_part organelle organelle_part
304	CotAD_10171	locus=At_chr7:7648532:7649281:- [translate_table: standard]	29471	0.032	-|-|1	-|-|1	-/-/CotAD_05465;Cotton_D_gene_10032703	CotAD_10171	MSLEEVLKVVFPFLDGVDLAACMVVCKQWRHIAKDDYFWKCVCAKRWPSICKRPNPPTVTYYKLYQTFYKRKHQRTLLPPRLSFDDLEFFIDIWTEDKLIFSEVVPGPVLQRGIKIPPAGICDMLKFHLQGPEYKMILPVDPRFTIPWSQTVSVSVLVGRKDSNKVACIINKSMFDYIDRTASRALAFDYLVFSPYYPFISGIRAWISLLFMEDRSDGVIDVFGIEMDFCDAANSQEEVLWLLDMLDWK	82.33	3e-156	gi|470136931|ref|XP_004304234.1|	PREDICTED: F-box protein At5g39250-like isoform 2 [Fragaria vesca subsp. vesca]	66.67	8e-123	sp|Q9FL82|FB270_ARATH	F-box protein At5g39250 OS=Arabidopsis thaliana GN=At5g39250 PE=2 SV=1	81.53	7e-150	D7SVC8	D7SVC8_VITVI Putative uncharacterized protein OS=Vitis vinifera GN=VIT_14s0068g00520 PE=4 SV=1	-	-	-	-	-	-	-	-	-	-	-
305	CotAD_27393	locus=Dt_chr3:39049074:39049637:- [translate_table: standard]	21077.7	0.08	1|-|1	1|-|1	Cotton_D_gene_10031067;Cotton_D_gene_10017590;CotAD_74219/-/Cotton_D_gene_10031067;Cotton_D_gene_10017590;CotAD_74219	CotAD_27393	MEAKRSLLAIFLLLSFLSISTAAPTRKTRTRKPCKSMVFYFHDIIYNGHNAKNATSAIVGSPQWGNKTILTGQNHFGDLVVFDDPITLDNNLHSKPVGRAQGFYIYDKKDIFTAWLGFSFVFNSTQHKGSINFAGADPLMNKTRDISVIGGTGDFFMARGVATLMTDAFEGEVYFRLRTDINLYECW	89.61	1e-103	gi|217071592|gb|ACJ84156.1|	unknown [Medicago truncatula]	66.88	2e-75	sp|P13240|DR206_PEA	Disease resistance response protein 206 OS=Pisum sativum GN=PI206 PE=2 SV=2	89.61	1e-102	B7FHC7	B7FHC7_MEDTR Putative uncharacterized protein OS=Medicago truncatula PE=2 SV=1	-	-	-	-	-	-	-	K19027|1|2e-27|111|smo:SELMODRAFT_443317|EC[not_get]!K01870|2|3e-09|58.9|eus:EUTSA_v10003524mg|EC[not_get]	-	-	-
306	Cotton_D_gene_10020620	locus=scaffold148:542439:544011:+ [translate_table: standard]	35459.2	0.1	-|-|1	-|-|9	-/-/-	Cotton_D_gene_10020620	MDQIQHNFITVRGLKFHVADLGEGSNVVLFLHGFPEIWYSWRYQMVALANAGFRTLAPDYRGYGLSDIPPEPEKTTFADLVADLVAILDHLGINKVFVVAKDFGVRPAYLLTLLHPHRVSCVVTLGVPHVPLEPRKYRESLPEGFYISRWNEPGRAEADFGRFDAKTVVRNIYILFSRSEIPIADEKQEVMDMVDASVPLPPWFTEEDLATYGALYEKSGFKTALQVPYRSFDEDFGITDPIVKVPALLIMGCKDYVLKFPGMEEYIKFGKAKELVPDLDIIYLPEGTHFVQEQSPELVNELILDFLRSHM	73.95	2e-173	gi|462407526|gb|EMJ12860.1|	hypothetical protein PRUPE_ppa008997mg [Prunus persica]	31.6	6e-39	sp|P34914|HYES_MOUSE	Epoxide hydrolase 2 OS=Mus musculus GN=Ephx2 PE=1 SV=2	75.08	3e-169	B9HYK8	B9HYK8_POPTR Predicted protein (Fragment) OS=Populus trichocarpa GN=POPTRDRAFT_233994 PE=4 SV=1	XF1965	53.5	1e-07	COG0596	Predicted hydrolases or acyltransferases (alpha/beta hydrolase superfamily)	R	General function prediction only ;	K08726|1|8e-39|137|cic:CICLE_v10001881mg|EC[not_get]	-	-	-
307	CotAD_56464	locus=At_chr10:32433977:32438305:- [translate_table: standard]	60452.8	0.113	1|1|1	2|4|3	-/-/-	CotAD_56464	MAPSFVTNGGVELFLYLLFSEAPSKLSMVPLVPPPATLVLLSSLHEIAKLFPNLFGQPSSMLVPNGIDSIGSDQKLKIGVVLSGGQAPGGHNVICGIFDYLQERAPGSTLYGFRGGPAGVMKGKYVELTADYIYPYRNQGGFDMICSGRDKIETPEQFKQAEETAAKLDLDGLVVIGGDDSNTNACLLAENFRSKNLKTRVIGCPKTIDGDLKCKEVPTSFGFDTACKIYAEMIGNVMIDARSTGKYYHFVRLMGRAASHITLECALQTHPNITIIGEEVAAKKLTLKNVTDYMVDVICKRAELGYNYGVILIPEGLIDFIPEVQQLIAELNEILAHDVVDENGLWKKKLTDQSLKLFEFLPQAIQEQLMLERDPHGNVQVAKIETEKMLIQMVETELE…	90.24	0	gi|224115922|ref|XP_002317160.1|	predicted protein [Populus trichocarpa]	90.04	0	sp|Q41141|PFPB_RICCO	Pyrophosphate--fructose 6-phosphate 1-phosphotransferase subunit beta OS=Ricinus communis GN=PFP-BETA PE=3 SV=1	90.24	0	B9HZE4	B9HZE4_POPTR Predicted protein OS=Populus trichocarpa GN=POPTRDRAFT_1093153 PE=4 SV=1	DR0635	66.6	3e-11	COG0205	6-phosphofructokinase	G	Carbohydrate transport and metabolism ;	K00895|1|0.0|957|tcc:TCM_030310|EC[not_get]	cellular_process metabolic_process single-organism_process	macromolecular_complex	binding catalytic_activity
308	CotAD_40855	locus=At_chr9:50664957:50667164:+ [translate_table: standard]	62640.6	0.275	11|1|1	108|19|18	-/-/-	CotAD_40855	MAFSGERKKKLFLALFASILLVTAIVTIATTVSISKKKSSNTVAAHSIIKSSCSSTLYPELCYSTISSAPDAETKVKNPKDVIELSLNLTVTAVQSNYLSIKKLISTQRKSLTEREKAALNDCLELVDETLDELFVAEHDLSDYPSFNKSISQHADDLKSLLSAAMTNQETCLDGFSHDKADKKVRQALLDGQMHVFHMCSNALAMIKNLTDTDMASQGYHPSSGRQLEEQDQTEWPKWLSEGDRRLLQATTVIPNVTVAADGSGDFLTVSEAVAAAPERSTTRYIIKIKAGVYRENVDVPSKKTNLMFVGDGRVNTIITASRNVVDGSTTFHSATVAAVGDGFLARDITFQNTAGPSKHQAVALRVGSDLSAFYRCGILAYQDTLYVHSLRQFYSQCL…	100	0	gi|377824751|gb|AFB77928.1|	pectin methylesterase [Gossypium hirsutum]	67.08	0	sp|Q43143|PMEU1_SOLLC	Pectinesterase/pectinesterase inhibitor U1 OS=Solanum lycopersicum GN=PMEU1 PE=2 SV=1	100	0	H6WYN9	H6WYN9_GOSHI Pectinesterase OS=Gossypium hirsutum GN=PME1 PE=2 SV=1	RSp0138	74.7	1e-13	COG4677	Pectin methylesterase	G	Carbohydrate transport and metabolism ;	K01051|1|0.0|951|tcc:TCM_037441|EC[not_get]	cellular_component_organization_or_biogenesis cellular_process	cell cell_part	enzyme_regulator_activity
309	CotAD_15803	locus=Dt_chr13:39236089:39242175:- [translate_table: standard]	105409	0.036	3|-|-	3|-|-	Cotton_D_gene_10019856/-/-	CotAD_15803	MASLPFSATSFHSTFICFNYKARNPNLFFLKKGSSFTFSRRKFIIKSVASDQRQDLKEEGQITEEASLDTFVPDSASIASSIKYHSEFTPSFAPDHFELPKAFKATAESVRDSLIINWNATYAYYEKINVKQAYYLSMEYLQGSALLNAIGNLELTGAYAEALKKLGHNLEDVAREEPDAALGNGGLGRLASCFLDSLATLNYPAWGYGLRYKYGLFKQYITKDGQEEVAENWLEMGNPWEIVRNDVSYPVKFYGEVISGPEGIKEWVGGEDITAVAYDVPIPGYKTKTTINLRLWSTKVAPEKFDLSAFNAGDHAKAYSAMNNAEKICYILYPGDESLEGKTLRLKQQYTLCSASLQDIIARYERRSGEFLNWEIFPEKVAVQMNDTHPTLCIPELIR…	77.11	0	gi|224112148|ref|XP_002316098.1|	predicted protein [Populus trichocarpa]	72.45	0	sp|P53535|PHSL2_SOLTU	Alpha-1,4 glucan phosphorylase L-2 isozyme, chloroplastic/amyloplastic OS=Solanum tuberosum GN=STP-1 PE=1 SV=1	77.11	0	B9HXL0	B9HXL0_POPTR Phosphorylase OS=Populus trichocarpa GN=POPTRDRAFT_881100 PE=3 SV=1	ZmalP	288	8e-84	COG0058	Glucan phosphorylase	G	Carbohydrate transport and metabolism ;	K00688|1|0.0|1470|jcu:105630524|EC[not_get]	metabolic_process		binding catalytic_activity
310	CotAD_59125	locus=scaffold457.1:716048:719771:- [translate_table: standard]	44595.4	0.085	2|-|-	3|-|-	CotAD_16542;Cotton_D_gene_10025709/-/-	CotAD_59125	MAALQYLDSLRNEHPELADWYNSLADLYQKKLWHQLTLKLEQFVALTVFQAGDALIKLYRNFITDFETKINPLKLAHFAVIVSQQYAEKEAAISFLEGVIEKLQATKEQRIEEPILYIKMQISKFKLEQGDQKECKKLLEDGKSTLDGMTDIDPSVYATYYWVSSQYHKFRQEFAEFYRSALLYLAYTSVESLSESFKLDLAFDLSLSALLGDNIYNFGELLAHPIIKSLLGTKVEWLYYILQSFNSGNLVRYEELCRVHNAALSAQPALVENEKKLLEKINILCLMEIIFSRPSDDRTIPLKVIAERTKLSIEDVEYLLMKSLSVRLIEGIIDQVEGTIHVSWVQPRVLGIPQIKSLRDRLDNWMGKVHNAWLSIEAETPDLVAS	90.67	0	gi|462404971|gb|EMJ10435.1|	hypothetical protein PRUPE_ppa007016mg [Prunus persica]	39.27	4e-89	sp|Q54NQ0|PSD13_DICDI	26S proteasome non-ATPase regulatory subunit 13 OS=Dictyostelium discoideum GN=psmD13 PE=2 SV=1	88.86	0	F6HT17	F6HT17_VITVI Putative uncharacterized protein OS=Vitis vinifera GN=VIT_02s0012g02660 PE=4 SV=1	-	-	-	-	-	-	-	K03039|1|0.0|707|tcc:TCM_016615|EC[not_get]	-	-	-
311	Cotton_D_gene_10009326	locus=scaffold367:781601:782727:- [translate_table: standard]	30967.1	0.094	-|2|1	-|18|5	-/Cotton_D_gene_10009325;Cotton_D_gene_10009324;CotAD_76943;CotAD_68621/Cotton_D_gene_10009325;Cotton_D_gene_10009324;CotAD_76943;CotAD_68621	Cotton_D_gene_10009326	MEGKEEDVRLGANKFPERQPIGTAAQSQDDKDYTEPPPAPLFEPSELTSWSFYRAGIAEFVATFLFLYISVLTVMGVVKDKTKCTTVGIQGIAWAFGGMIFALVYCTAGISGGHINPAVTFGLFLGRKLSLTRAIYYMVMQCLGAICGAGVVKGFMGKTRYGALGGGANSVNHGYTKGDGLGAEIVGTFVLVYTVFSATDAKRSARDSHVPILAPLPIGFAVFLVHLATIPITGTGINPARSLGAAIIFNKDKGWDDHWIFWVGPFIGAALAALYHVVVIRAIPFKSK	99.31	0	gi|256568419|gb|ACU87553.1|	PIP protein [Gossypium hirsutum]	88.93	0	sp|P25794|PIP2_PEA	Probable aquaporin PIP-type 7a OS=Pisum sativum GN=TRG-31 PE=2 SV=2	99.31	0	G8XV51	G8XV51_GOSHI PIP protein OS=Gossypium hirsutum GN=PIP1;4 PE=2 SV=1	SP2184	67.4	1e-12	COG0580	Glycerol uptake facilitator and related permeases (Major Intrinsic Protein Family)	G	Carbohydrate transport and metabolism ;	K09872|1|0.0|545|tcc:TCM_042573|EC[not_get]	localization	membrane membrane_part
312	CotAD_53116	locus=scaffold2526.1:128089:129583:- [translate_table: standard]	35320.8	0.076	1|-|-	1|-|-	Cotton_D_gene_10018456;Cotton_D_gene_10018457;CotAD_03016/-/-	CotAD_53116	MRAPALSFCSNALPGSAMQCEKQPCSATAMFPTAQWCCRGANNDYYRHKKIGFRSNCNKGDAGCGCCCGGGSDGGGGLSSIVTREVFEEMLPYRNDPRCPAAGFYTYEALMAAAKAYPAFAATGDDATRKREVAAFFGQTSHETAAGRGRNPPGGPFVWGYCYNKEVKPLSEYCDGTNQQFPCVPGQKYYGRGPIQLTWNYNYGQFGAAIGKEKEMLENPDLLLTDALLAFQSALWFWMTPQRSMPSCHDVIVGAWMPSARDKEAGRFPGYGVITNIINGGQCGRGRNATCLELITATILIATIRRILERILYIK	54.01	7e-83	gi|13124019|sp|Q41596.1|CHI1_THECC	RecName: Full=Endochitinase 1; Flags: Precursor	54.01	3e-83	sp|Q41596|CHI1_THECC	Endochitinase 1 OS=Theobroma cacao GN=CHIA1 PE=2 SV=1	61.5	3e-79	D7RTU7	D7RTU7_GOSHI Class I chitinase OS=Gossypium hirsutum PE=4 SV=1	STM0233	89.4	3e-19	COG3979	Uncharacterized protein contain chitin-binding domain type 3	R	General function prediction only ;	K01183|1|2e-83|257|tcc:TCM_006498|EC[not_get]	metabolic_process		catalytic_activity
313	CotAD_04760	locus=At_chr4:37990329:37994212:+ [translate_table: standard]	44463.2	0.384	1|1|2	1|2|4	Cotton_D_gene_10025167/Cotton_D_gene_10025167/Cotton_D_gene_10025167	CotAD_04760	MDYFYGPGRNHLFVPGPVNIPEPVIRAMNRNNEDYRSPAIPAMTKTLLEDVKKIFKTTTGTPFMIPTTGTGAWESALTNTLSPGDRIVSFLIGQFSLLWIDQQQRLKFNVDVVESEWGQGANLDVLAEKLAADRTHTIKAICIVHNETATGVTNNLATVRKLLDHYGHPALLLVDGVSSICALDFRMDEWGVDVALTGSQKALSLPTGIGIVCASPKALEATKTAKSVRVFFDWNDYLKFYKLGTFWPYTPSIQLLYGLRAALDLIFEEGLDNIIERHSRLGKATRLAVEAWGLKNCTQKEEWFSDTVTAVLVPPYIDSSEIVKRGWKRYNLSLGLGLNKVAGKVFRIGHLGNLNELQLLGCLAGVEMILKDVGYPVKLGSGVAAASAYLQNNIPMIPS…	91.77	0	gi|462408129|gb|EMJ13463.1|	hypothetical protein PRUPE_ppa006653mg [Prunus persica]	89.03	0	sp|Q56YA5|SGAT_ARATH	Serine--glyoxylate aminotransferase OS=Arabidopsis thaliana GN=AGT1 PE=1 SV=2	91.77	0	B9SYQ5	B9SYQ5_RICCO Serine-pyruvate aminotransferase, putative OS=Ricinus communis GN=RCOM_0063050 PE=3 SV=1	SSO2597	142	5e-38	COG0075	Serine-pyruvate aminotransferase/archaeal aspartate aminotransferase	E	Amino acid transport and metabolism ;	K00830|1|0.0|758|tcc:TCM_040844|EC[not_get]			binding catalytic_activity
314	CotAD_04647	locus=At_chr4:36886295:36887988:- [translate_table: standard]	60773.2	0.009	-|1|1	-|1|1	-/-/-	CotAD_04647	MAVSMSILVYMVIISSIAIAENQNQFVYNGFHGSNLHLNGIAKIHPNGLLELTNTSYQQIGRAFFPFPIKFNTSSFSTTFVFAIVPKLPKLGGHGITFTISPSIEFFNRALANQYLGLFNITSNGHPTNRVFAIELDTMKNPEFEDIDDNHVGIDINSLQSYVSAPASYYSDKDKENKTLRLLSGKPVQLWIDYDERDMLLNVTMAPFGTQKPWLPLLSTNLNLSMSGSMHVGFSASTGSVPSDQYILWWSFNKSGQSQSLDYAKLPPPPPPRSRPRAKPDFQVAVPSVISCLLVITFIGTAYKMWIRRYEEIREDWEHEYGPHRFSYKDLYNATKGFKGRELLGIGGFGEVYKGVLPSSNEQVAIKRVSHSSKQGMKEFIAEIATMGRLRHRNLVQLL…	61.74	0	gi|255559006|ref|XP_002520526.1|	kinase, putative [Ricinus communis]	50	1e-172	sp|Q9M345|LRK42_ARATH	L-type lectin-domain containing receptor kinase IV.2 OS=Arabidopsis thaliana GN=LECRK42 PE=2 SV=1	61.74	0	B9S3F7	B9S3F7_RICCO Kinase, putative OS=Ricinus communis GN=RCOM_0733440 PE=3 SV=1	ML0897	62.4	8e-10	COG0515	Serine/threonine protein kinase	RTKL	General function prediction only ; Signal transduction mechanisms ; Transcription ; Replication, recombination and repair ;	K04730|1|0.0|638|rcu:RCOM_0733220|EC[not_get]	cellular_process		binding catalytic_activity
315	Cotton_D_gene_10018944	locus=scaffold37:517400:518780:+ [translate_table: standard]	38560	0.535	1|-|-	1|-|-	-/-/-	Cotton_D_gene_10018944	MSAFVGKYAEELIKNAKYIATPGKGILAADESTGTIGKRLSSINVENIESNRQALRELLFTSPNALSCLSGVILFEETLYQKTSDGKPFVEILEENNVIPGIKVDKGTVEIAGTNGETTTQGFDSLGARCQQYYKAGARFAKWRAVLKIGPNEPSELAIQQNAQGLARYAIICQENGLVPIVEPEVLTDGPHDIKKCAAVTETVLAAVYKALNDHHVLLEGTLLKPNMVTPGSDSPKVAQEVIAQYTVTALRRTVPPAVPGIVFLSGGQSEEEATQNLDAMNKLEVLKPWTLSFSFGRALQQSTLKTWAGKKANVGKAQEAFLSRCKANSEATLGKYSGGSAGGLASESLFVKGYKY	92.44	0	gi|462401070|gb|EMJ06627.1|	hypothetical protein PRUPE_ppa007744mg [Prunus persica]	88.52	0	sp|P46256|ALF1_PEA	Fructose-bisphosphate aldolase, cytoplasmic isozyme 1 OS=Pisum sativum PE=2 SV=1	91.32	0	B9S0W4	B9S0W4_RICCO Fructose-bisphosphate aldolase OS=Ricinus communis GN=RCOM_1538490 PE=3 SV=1	FN0322	52.8	3e-07	COG3588	Fructose-1,6-bisphosphate aldolase	G	Carbohydrate transport and metabolism ;	K01623|1|0.0|662|tcc:TCM_030571|EC[not_get]	metabolic_process single-organism_process		catalytic_activity
316	CotAD_66398	locus=Dt_chr1:20012257:20017083:- [translate_table: standard]	31085.8	0.044	-|1|-	-|1|-	-/-/-	CotAD_66398	MHFSGIFYVSNKIRTQTVVLKEAYRKDFLMEKHPLMGMRFRYIHVMNKSEKFRKRDGVPVFRRKRKVMSNADKGLSPNFAPRGVGTETACKEDGVSHQSFRLEVNAIDYGFEPTDTPRTDRSVSKNIELGLAALHGQKGPAYDLIILNAGIVDHLLGCDAAEDVTIALDRAREAVDSGLSNASFIGQFPVSLSWMDVFIGIWDKVKKLASQCQKEADKCNSGMETCEEVREKAEEALSAQMKLTAMWEIIARQKGWREKVAKSKAQTQGNLQFV	54.97	3e-49	gi|470130062|ref|XP_004300925.1|	PREDICTED: anthranilate phosphoribosyltransferase-like [Fragaria vesca subsp. vesca]	-	-	-	-	51.96	1e-45	B9HTU6	B9HTU6_POPTR Predicted protein OS=Populus trichocarpa GN=POPTRDRAFT_884276 PE=4 SV=1	-	-	-	-	-	-	-	K16569|1|9e-13|71.6|sita:101783840|EC[not_get]			catalytic_activity
317	CotAD_75150	locus=scaffold12158.1:251:1402:+ [translate_table: standard]	32284	0.123	-|2|1	-|2|1	-/-/-	CotAD_75150	MVVMIGGNISKTMWLQGLKMVIVNLGLGGCSRGILVPEADMMLGHPDLFKPLLQTMMIAIPGPRLPKGPTIEYQEKIGLRALKLPTADAVVVRRTLVTLMENPHGLPGINESPEHIGKREAYWSSVKPAHFVVKIASKSLLGIYRILGVGVFIGLLCRFSFGRWLLLKFPSFFSFGWFRKTGPSEDEVRSASFKMWFVGYGFSDCNLASERNSKPDMEIITRVMGPEIGYVTTPISLIQCALIVLSQRENLPKGGVYTPGIVFGPDLQERLQENGISFDVVSKTALPSSAPA	73.71	8e-119	gi|255584329|ref|XP_002532900.1|	conserved hypothetical protein [Ricinus communis]	72.02	7e-111	sp|Q8LGI2|SCPDL_ARATH	Probable mitochondrial saccharopine dehydrogenase-like oxidoreductase At5g39410 OS=Arabidopsis thaliana GN=At5g39410 PE=1 SV=2	73.71	1e-117	B9T3T1	B9T3T1_RICCO Putative uncharacterized protein OS=Ricinus communis GN=RCOM_0169130 PE=4 SV=1	ECU10g1490	60.1	1e-09	COG3268	Uncharacterized conserved protein	S	Function unknown ;	-	-	-	-
318	Cotton_D_gene_10027371	locus=scaffold150:690196:694073:- [translate_table: standard]	29969.3	0.148	4|3|3	9|8|11	CotAD_70603;CotAD_04932/CotAD_70603;CotAD_04932/CotAD_70603;CotAD_04932	Cotton_D_gene_10027371	MADDEVKDEVPEITSFDPTKKKKKKKVVIQDPADESVDKLAEKTEALSVSEGLDFSNLKKKKKKPVEGNTFTDESGDAGDDFDGHIDGDEEGEGIVLQQRYPWDGTDRDYIYDELLGRVFNILRENNPELAGDRRRTVMRPPQVLREGTKKTVFVNFMDLCKTMHRQPDHVMAFLLAELGTSGSLDGQQRLVVKGRFAPKNFEGILRRYINEYVICLGCKSPDTILSKENRLFFLRCEKCGSGRSVAPIKAGFVARVGRRNAGT	85.87	2e-144	gi|225434323|ref|XP_002265847.1|	PREDICTED: eukaryotic translation initiation factor 2 subunit beta [Vitis vinifera]	79.7	6e-132	sp|P55871|IF2B_MALDO	Eukaryotic translation initiation factor 2 subunit beta OS=Malus domestica PE=2 SV=2	85.87	3e-143	F6GU78	F6GU78_VITVI Putative uncharacterized protein OS=Vitis vinifera GN=VIT_06s0004g08180 PE=4 SV=1	SPAC2F7.05c	52.4	3e-07	COG1601	Translation initiation factor 2, beta subunit (eIF-2beta)/eIF-5 N-terminal domain	J	Translation, ribosomal structure and biogenesis ;	K03238|1|6e-154|432|tcc:TCM_024370|EC[not_get]	cellular_process metabolic_process		binding
319	CotAD_22596	locus=Dt_chr6:17295250:17295882:+ [translate_table: standard]	22164.5	0.219	-|1|-	-|1|-	-/-/-	CotAD_22596	MLHIFLLFSLIFTSTNVLAQDFCVANTASGIVTPSGYPCIMEANVTSDDFAFSGLGVPGNTSNIISAAVTPAFVGQYPAVNGLGLSAARLDLAPGGVIPMHTHPGANELLYVVHGHITCGFISSANKVYLKTLKRGDVMVFPQGLFHFQINAAGKRPSLAIVTFSSPNPGLQILDFALFANDLPSSLLEKSTFLDDAQVKKLKGVLGGTG	72.04	3e-93	gi|224073704|ref|XP_002304135.1|	predicted protein [Populus trichocarpa]	64.65	2e-82	sp|P94072|GL33_ARATH	Germin-like protein subfamily 3 member 3 OS=Arabidopsis thaliana GN=GER3 PE=1 SV=1	72.04	4e-92	B9GW15	B9GW15_POPTR Predicted protein OS=Populus trichocarpa GN=POPTRDRAFT_853139 PE=4 SV=1	sll1358	55.5	1e-08	COG2140	Thermophilic glucose-6-phosphate isomerase and related metalloenzymes	GR	Carbohydrate transport and metabolism ; General function prediction only ;	K11426|1|1e-26|110|sly:101250545|EC[not_get]!K19476|3|1e-15|77.8|mdm:103418875|EC[not_get]	metabolic_process	extracellular_region	antioxidant_activity binding catalytic_activity
320	CotAD_17486	locus=At_chr7:11353180:11360347:- [translate_table: standard]	75782.9	0.02	-|2|-	-|8|-	-/CotAD_31830/-	CotAD_17486	MPSAVSQQWQEKATGFFSSSGVKLKEASQTAGTFVGEVAKDAKGNVTDVAERVGSMVKSRWAFLRQPATRHAVQESLISAAATTGTFLRKGITGTKDRVVVGKTKVEEVAKKTAQKSKTILTDIERWQKGVASTDVFGVPIEVTVQRQQAIKPIPLILVKCADYLILSGINSQYLFKAEGDKKVSEQLVSAYNQDFNASIPEGVNPIDVAALAKYYIASLPEPLTTCELYDEIKSARSSIHAMRNVLKMLPSVNYMTLEFITALLLRVSQKSVLNKMDARSLALEMAPVIMWQKDRKPESYRKYWSHPLKSPSKGSMDSTPTYSAWDMLEDDGEDMDASSHIPLDDGIPVDFGAIEVRVQEGVEDSGKYPIVVSTWPFLEAVRAAWEAVDKRFNAVDAV…	80.11	0	gi|224129900|ref|XP_002328831.1|	predicted protein [Populus trichocarpa]	75.07	0	sp|Q3E875|RGAP1_ARATH	Uncharacterized Rho GTPase-activating protein At5g61530 OS=Arabidopsis thaliana GN=At5g61530 PE=1 SV=2	80.11	0	B9N0M8	B9N0M8_POPTR Predicted protein OS=Populus trichocarpa GN=POPTRDRAFT_923519 PE=4 SV=1	ECs0907	59.3	2e-09	COG1446	Asparaginase	E	Amino acid transport and metabolism ;	K01444|1|0.0|640|tcc:TCM_014870|EC[not_get]			catalytic_activity
321	CotAD_58885	locus=At_chr11:2522681:2532868:- [translate_table: standard]	53303	0.265	-|1|1	-|1|1	-/-/-	CotAD_58885	MNSNHLLLEEPIRMASILEPSKPSFFPAMTKIVGTLGPKSRSVEIISDCLKAGMSVARFDFSWGDIEFHQETLENLKTAVKSTRKLCAIMLDTGGPELQVVNKTEHPISLEADTKVILTPDQDKPATSNLLPINYHGLSKAVKKGDTIFIGQYLFTGNETTSVWLEVISTWGVRNNIDILSLSYTRHAEDIRHARSFLSKLGELNQTQIFAKIENIEGLTHFDEILQEADGIIFSRGNLGIDLPPEKVFLFQKAALYKCNMMGKPAVVTRVVDSMTDNLRPTRAEATDVANAVLDGSDAILLGAETLRGLYPVETVSTVGKICAEAEKVFNQDLYFKKTVKNVGEPMSHLESIASSAVRAAIKVKASAIICFTSSGRAARLIAKYRPTMPVISVVIPRL…	80.65	0	gi|224069760|ref|XP_002326407.1|	predicted protein [Populus trichocarpa]	42.21	2e-119	sp|Q42806|KPYC_SOYBN	Pyruvate kinase, cytosolic isozyme OS=Glycine max PE=2 SV=1	80.65	0	A9P7U5	A9P7U5_POPTR Pyruvate kinase OS=Populus trichocarpa GN=POPTRDRAFT_589553 PE=2 SV=1	CPn0097	195	3e-56	COG0469	Pyruvate kinase	G	Carbohydrate transport and metabolism ;	K00873|1|0.0|932|tcc:TCM_043508|EC[not_get]	-	-	-
322	Cotton_D_gene_10002303	locus=scaffold462:260774:262958:- [translate_table: standard]	28311.9	0.158	1|1|1	2|3|4	-/-/-	Cotton_D_gene_10002303	MAFLSKIGNMLRQTSTTQINAQLSASSPSLFQVFRCMSNAPSSKLFVGGISYQTDDQGLREAFSKYGEVIEARIIVDRETGRSRGFGFVTYTSSEDASSALQALDGQTLHGRQVRVNYATERAPRNFGGGGYGGGGYGGGGYGGGGYGGGGYGGGGYGGGGYGRNAAPTSGNYGGNVGYGGSVNYGGQGSHGGFGQSDATNYESGSFSVAGGGGGIDGVGTGGSAGFGSPNMGIDSGDQFSSTEDGFKEEEAFDSNEPMNENFRDEDDENGSDFAKRA	72.44	2e-61	gi|118488717|gb|ABK96169.1|	unknown [Populus trichocarpa]	69.67	2e-54	sp|Q9FNR1|RBG3_ARATH	-	72.44	2e-60	A9PIG6	A9PIG6_POPTR Putative uncharacterized protein OS=Populus trichocarpa PE=2 SV=1	SPAC19A8.13	51.2	5e-07	COG0724	RNA-binding proteins (RRM domain)	R	General function prediction only ;	K12741|1|4e-74|234|tcc:TCM_014265|EC[not_get]			binding
323	CotAD_34944	locus=scaffold854.1:480461:482888:- [translate_table: standard]	29942.7	0.094	1|1|-	3|1|-	CotAD_35277/CotAD_35277/-	CotAD_34944	MASQVLPQALHMIPRNQVQPFNPVKNRGFSAFLSRGPSPLATSKVSVSGFHSKFPVGSSFSCFARRGFVVRAESNPEGEGEAEAERNENGVEEPETKAEAEVEGEGEGEGEDEAEEEKPKEPRKPRIKLGDIMGELRTVDMNSGRHSECLSLCEPVKILNKRAIEASDKERPTPDLRTGDIVEIKLEVPENRRRLSVYKGIVISKQNAGIHTTIRIRRIIAGVGVEIVFPVYSPNIKEIKVVKHRKVRRARLYYLRDKLPRLSTFK	54.17	6e-48	gi|297804426|ref|XP_002870097.1|	ribosomal protein L19 family protein [Arabidopsis lyrata subsp. lyrata]	52.79	3e-48	sp|Q8W463|RK191_ARATH	50S ribosomal protein L19-1, chloroplastic OS=Arabidopsis thaliana GN=At4g17560 PE=2 SV=1	54.17	8e-47	D7MBX1	D7MBX1_ARALL Ribosomal protein L19 family protein OS=Arabidopsis lyrata subsp. lyrata GN=ARALYDRAFT_914957 PE=4 SV=1	SA1084	77.8	1e-17	COG0335	Ribosomal protein L19	J	Translation, ribosomal structure and biogenesis ;	K02884|1|5e-80|244|tcc:TCM_015878|EC[not_get]		cell cell_part organelle
324	CotAD_62262	locus=Dt_chr3:22046677:22050035:+ [translate_table: standard]	60044.1	0.018	1|1|1	5|3|2	Cotton_D_gene_10034285/Cotton_D_gene_10034285/Cotton_D_gene_10034285	CotAD_62262	MACSATIQPLLNFELSHSHQPKRPYSLPLCSFIKKPRLSPKHFFSQSKDYTKINIFSSPSLFSRQKPGSHVAAQSDYSSGEEAESLLPDSAYQEPFSWSSVILPFLFPALRGSLFGYDIGATSGATISLHSPELSGTTWFNLSAIQLGLVVSGSLYGALLGSLLVYPIADSLGRRRELLIAALLYVLGGVLTAFAPGLSVLLVGRLLYGLGIGLAMHGAPLYIAETCPSQIRGTLISLKELFIVLGILLGYFVGSFQINAVGGWRYMYGCSAPVALLMGLGMWSLPPSPRXVQGKGSLQELKEKAILALSKLRGRAPGDAASEKQIEDTLISVKSAYMEQESEGNILEVFQGPSLKAFIIGGGLVLFQQITGQPSVLYYAGPILQSAGFSAAADATRLS…	75.5	0	gi|356542274|ref|XP_003539594.1|	PREDICTED: D-xylose-proton symporter-like 3, chloroplastic-like [Glycine max]	72.57	0	sp|Q0WWW9|XYLL3_ARATH	D-xylose-proton symporter-like 3, chloroplastic OS=Arabidopsis thaliana GN=At5g59250 PE=1 SV=2	75.5	0	I1LQM5	I1LQM5_SOYBN Uncharacterized protein OS=Glycine max GN=Gma.15031 PE=4 SV=1	L131423	51.2	3e-06	COG2814	Arabinose efflux permease	G	Carbohydrate transport and metabolism ;	K08150|1|4e-56|199|mtr:MTR_7g005910|EC[not_get]	localization metabolic_process	membrane membrane_part	catalytic_activity transporter_activity
325	Cotton_D_gene_10004544	locus=scaffold274:591546:592262:- [translate_table: standard]	24420.1	0.046	1|1|-	1|1|-	CotAD_02157/CotAD_02157/-	Cotton_D_gene_10004544	MAELEYQANTKTNSATTARLKLFGFNVPEDDDVLESSTTKDPSSGSSEPGGFPAPGDRKYECQYCCREFANSQALGGHQNAHKKERQQLKRAQLQATRSAAVSFARNPIISAFAPPPHLLASATPVVVPAAAGPSWVYLPRGGPPPFHVSHGCVIPSAGGGGGGGGVGRGPAGVPYGGGGGLGDPGVSVGPQVMQGGGHHGRGVDGPSLRRFSKGDGGPSFDDALGLDLHLSLAPARP	59.75	4e-73	gi|225424029|ref|XP_002283623.1|	PREDICTED: zinc finger protein 6 [Vitis vinifera]	56.48	3e-26	sp|Q39265|ZFP6_ARATH	Zinc finger protein 6 OS=Arabidopsis thaliana GN=ZFP6 PE=2 SV=1	59.75	6e-72	A5BMV3	A5BMV3_VITVI Putative uncharacterized protein OS=Vitis vinifera GN=VIT_01s0011g03780 PE=4 SV=1	-	-	-	-	-	-	-	K10773|1|1e-11|66.6|tcc:TCM_011985|EC[not_get]!K11498|3|9e-09|58.5|obr:102710215|EC[not_get]	-	-	-
326	CotAD_66046	locus=scaffold4028.1:49071:50705:- [translate_table: standard]	35908	0.025	1|-|-	1|-|-	-/-/-	CotAD_66046	MSINLNAHAFAGNPIRSKTPKAHDPLSPSSAFQSLKTHLLQNPETTSLPPPPKSPLFKVLPFRKGRPLASSSITGNNDDDVPIWHLGWISLPDCKNFLGKCGVDLTEDSLVYLGSKVEDDVVYWAVDVSGESRLVPELGDKQFCFVELRTLMVATDWSDSIAMGELAIAGHARALLEWHNLSRFCGHCGEKTIPKEAGRRKQCSNESCKKRIYPRVDPVVIMLVIDRENDRALLGRQSRFVPRMWSCLAGFIEPGESLEEAVRRETYEEAGIEVGEVVYHSSQPWPVGPSSIPCQLMVGFFAYAKSLEINVDKEELEGT	75.39	1e-173	gi|462397594|gb|EMJ03262.1|	hypothetical protein PRUPE_ppa005825mg [Prunus persica]	71.92	2e-164	sp|Q94A82|NUD19_ARATH	Nudix hydrolase 19, chloroplastic OS=Arabidopsis thaliana GN=NUDT19 PE=1 SV=1	77.92	1e-169	B9SEP1	B9SEP1_RICCO Mutt/nudix hydrolase, putative OS=Ricinus communis GN=RCOM_0221070 PE=4 SV=1	HI0432	86.3	5e-19	COG2816	NTP pyrophosphohydrolases containing a Zn-finger, probably nucleic-acid-binding	L	Replication, recombination and repair ;	K03426|1|0.0|531|tcc:TCM_038031|EC[not_get]		cell cell_part organelle	binding catalytic_activity
327	Cotton_D_gene_10025349	locus=scaffold39:2533747:2535264:- [translate_table: standard]	25186.1	0.247	1|1|3	9|6|11	-/-/-	Cotton_D_gene_10025349	MGRRPARCYRQIKNKPYPKSRYCRGVPDPKIRIYDVGMKKKGVDEFPFCVHLVSWEKENVSSEALEAARIACNKYMAKYAGKDAFHLRVRVHPFHVLRINKMLSCAGADRLQTGMRGAFGKPQGTCARVAIGQVLLSVRCKDSNSHHAQEALRRAKFKFPGRQKIIVSRKWGFTKFNRTDYLKYKSENRIVPDGVNAKVCLFHRHGREFVKYVSS	89.59	1e-145	gi|388501178|gb|AFK38655.1|	unknown [Lotus japonicus]	94.09	4e-143	sp|Q9SPB3|RL10_VITRI	60S ribosomal protein L10 OS=Vitis riparia GN=RPL10 PE=2 SV=1	97.49	4e-144	I1MB53	I1MB53_SOYBN Uncharacterized protein OS=Glycine max GN=Gma.11225 PE=4 SV=1	VNG0099G	111	3e-30	COG0197	Ribosomal protein L16/L10E	J	Translation, ribosomal structure and biogenesis ;	K02866|1|2e-145|407|tcc:TCM_042310|EC[not_get]	-	-	-
328	Cotton_D_gene_10010428	locus=scaffold128:298429:300751:+ [translate_table: standard]	28976.1	0.076	1|-|-	2|-|-	CotAD_03494;CotAD_60357/-/-	Cotton_D_gene_10010428	MATAASSSSFTMLHLASLFSIFVLVNARIPGVYTGGSWETAHATFYGGSDASGTMGGACGYGNLYSQGYGVNTAALSTALFNNGLSCGACFEIKCANDPRWCHPGSPSIFITATNFCPPNFALPSDNGGWCNPPRPHFDLAMPMFLKIAEYRAGIVPVSFRRVPCRKQGGIRFTINGFRYFNLVLITNVAGAGDIVKVSIKGTNTGWTSMSRNWGQNWQSNVILVGQALSFRVKGSDKRTSTSWNVAPTNWQFGQTFTGKNFRY	88.58	6e-169	gi|21314549|gb|AAM47000.1|AF512542_1	alpha-expansin precursor [Gossypium hirsutum]	82.68	6e-161	sp|O48818|EXPA4_ARATH	Expansin-A4 OS=Arabidopsis thaliana GN=EXPA4 PE=1 SV=1	88.58	8e-168	Q8LKK0	Q8LKK0_GOSHI Alpha-expansin (Precursor) OS=Gossypium hirsutum GN=Exp4 PE=3 SV=1	-	-	-	-	-	-	-	K00051|1|3e-12|69.7|obr:102709764|EC[not_get]		cell cell_part
329	CotAD_76684	locus=scaffold11425.1:1905:2399:- [translate_table: standard]	18325.4	0.201	-|2|2	-|4|5	-/-/-	CotAD_76684	MCQAYRIQHGFDAISAMPTNLYGPNDNFHPENSHVLPALMRRFHKAKVEGAKEVVIWGTGSPLREFLHVDDLADAVVFLLGNYSGLEHVNVGSGKEVTIKELAELVKEVVGFEGELVWDSSKPDGTPRKLMDSSKLASLGWNAKISLKDGLIDTYKWYLEKVKQ	89.63	7e-107	gi|462419619|gb|EMJ23882.1|	hypothetical protein PRUPE_ppa008630mg [Prunus persica]	82.72	1e-100	sp|Q67WR2|FCL1_ORYSJ	Probable GDP-L-fucose synthase 1 OS=Oryza sativa subsp. japonica GN=Os06g0652400 PE=2 SV=1	86.59	4e-104	G7KRU3	G7KRU3_MEDTR GDP-L-fucose synthase OS=Medicago truncatula GN=MTR_7g108490 PE=4 SV=1	PAB2145	73.6	1e-15	COG0451	Nucleoside-diphosphate-sugar epimerases	MG	Cell wall/membrane/envelope biogenesis ; Carbohydrate transport and metabolism ;	K02377|1|5e-113|326|tcc:TCM_038450|EC[not_get]	-	-	-
330	CotAD_32661	locus=scaffold1149.1:131427:133828:- [translate_table: standard]	55200.7	0.211	2|1|2	3|1|5	-/-/-	CotAD_32661	MLCRRILLIKVWNNGRRWLLPSSSLSPVPTTADYKRHFSTHIMAAFSLPQNNQFTLKIPYMENRCKFSSNAVADLHTNGIVDVPLAQTGEGIAECELLKWFIQEGDEVEEFQPLCEVQSDKATIEITSRYKGRVAQVLHVPGNIVKVGETLLKMAVEDTQVPLVTLSNLENEKLPDTKSNKDFTGGVLSTPAVRNLAKEHGININDVQGSGKDGRVLKEDVLKYATQEGIIKDPLVTATATADLGQLFHREKSSLLESAQVSGHYEDTIVPLRGFQRTMVKTMSMAAKVPHFHYVEEIDCDALAELKASFQTNNLEPGLKFTFLPVLIKSLSMALSKYPMVNSCFNEESVEVILRGSHNIGIAMATPNGLVVPNIKNVQSLSILEITKELSRLQQLSLD…	66.47	0	gi|255551811|ref|XP_002516951.1|	lipoamide acyltransferase component of branched-chain alpha-keto acid dehydrogenase, putative [Ricinus communis]	42.12	5e-110	sp|P53395|ODB2_MOUSE	Lipoamide acyltransferase component of branched-chain alpha-keto acid dehydrogenase complex, mitochondrial OS=Mus musculus GN=Dbt PE=2 SV=2	66.47	0	B9RT82	B9RT82_RICCO Lipoamide acyltransferase component of branched-chain alpha-keto acid dehydrogenase, putative OS=Ricinus communis GN=RCOM_0681970 PE=3 SV=1	L0035	176	1e-48	COG0508	Pyruvate/2-oxoglutarate dehydrogenase complex, dihydrolipoamide acyltransferase (E2) component, and related enzymes	C	Energy production and conversion ;	K09699|1|0.0|798|tcc:TCM_046789|EC[not_get]	cellular_process metabolic_process		binding catalytic_activity
331	CotAD_50518	locus=At_chr11:6759406:6760572:+ [translate_table: standard]	34663.8	0.17	1|1|2	2|1|12	-/-/-	CotAD_50518	MALFRSLLLIIFIVAVSSCQTNAQLSPNYYSSTCPQALSIVKAEVAAAIKNETRIGASLLRLHFHDCFVNGCDGSVLLDDNSTFIGEKTAVPNNNSARGFNVVDNIKARLEKACPGVVSCADILAIAARDSVVRLGGPSWKVRLGRRDSTSASRSAANTSIPPPTSNLSALISSFSAQGLSIKNLVALSGSHTIGLARCTSFRSHIYNDSNIDPSFANSLRRICPRSGNDSVLAPLDRQTPTSFDNLYYKNLLDKKGLLHSDQEIFNGSSLTDGLVKKYAADTSLLFKEFAKSMIKMGNIKPLTGNAGEIRINCRKAN	78.86	8e-171	gi|205326623|gb|ACI03401.1|	peroxidase 1 [Litchi chinensis]	60.88	4e-131	sp|A7NY33|PER4_VITVI	Peroxidase 4 OS=Vitis vinifera GN=GSVIVT00023967001 PE=1 SV=1	78.86	1e-169	B5U1R3	B5U1R3_LITCN Peroxidase 1 OS=Litchi chinensis PE=2 SV=1	-	-	-	-	-	-	-	K00430|1|0.0|504|tcc:TCM_045424|EC[not_get]	-	-	-
332	CotAD_08793	locus=At_chr1:52895290:52897581:- [translate_table: standard]	37760.7	0.652	1|1|2	14|4|7	-/-/-	CotAD_08793	MAIEIPRVKLGTQGFEVSKLGFGCMSLTGHDHSVSDEDGIAIIKHAVERGVTHIDTADLYGPKTNEILVGKALKHLPREKVQLATKFGVESMGPDGPVINGTPEFVRSSLEASLQRLDVDYIDLYYIIRVDRKTPIEDTMEELKKLVEEGKIKYIGISEASPETIRRAHAVHPLTAVQLEWSLWTRDVEEELIPLCRELGIGIVAYSPLGHGFFAGKAKEDTSNSSLEVYPRFQGENLEQNRILYSKVEKLAEKHGCTPAQLALAWVLHQGDDVSPIPGTTKIKNLDSNIESVKVKLTKEDLKEISDAIPIHEVAGGTYPEGLKQFTWKYGNTPPKKRT	69.12	8e-171	gi|470132346|ref|XP_004302044.1|	PREDICTED: probable aldo-keto reductase 1-like [Fragaria vesca subsp. vesca]	65.77	2e-164	sp|C6TBN2|AKR1_SOYBN	Probable aldo-keto reductase 1 OS=Glycine max GN=AKR1 PE=2 SV=1	67.66	3e-169	B9REQ1	B9REQ1_RICCO Aldo/keto reductase, putative OS=Ricinus communis GN=RCOM_1427650 PE=4 SV=1	ydjG	157	7e-45	COG0667	Predicted oxidoreductases (related to aryl-alcohol dehydrogenases)	C	Energy production and conversion ;	K05275|1|1e-52|179|zma:100272747|EC[not_get]!K17744|2|9e-27|110|crb:CARUB_v10005247mg|EC[not_get]	metabolic_process		catalytic_activity
333	Cotton_D_gene_10001853	locus=scaffold396:271841:276776:+ [translate_table: standard]	96199.9	0.009	1|-|-	1|-|-	CotAD_67146;Cotton_D_gene_10039568;CotAD_32037;CotAD_49134;CotAD_48947/-/-	Cotton_D_gene_10001853	MEELKHEQEMRERRNQDREHWRDGRHSDNSAPSSRFDELPDDFDPSGKLPGSFDDGDPQTTNLYVGNLSPKVDENFLLRTFGRFGPIASVKIMWPRTEEERRRQRNCGFVAFMNRADGQAAKDEMQGVVVYEYELKIGWGKSVALPSQALPAPPPGHMAIRSKEGSSIILSGPSGPPVTSVPNQNSELVLTPNVPDIMVPPPDDDHLRHVIDTMALYVLDGGCAFEQAIMERGRGNPLFSFLFELGSKEHTYYVWRLYSFAQGDTLQRWRTEPFIMITGSGRWVPPPLPTTRSPEHEKDYTATYAAGRSRWLEPERTLNDPQRDEFEDMLRALTLERSQIKEAMGFALDNADAAGEIVEVLTESLTLKETPIPTKVARLMLVSDILHNSSAPVKNASAY…	82.45	0	gi|470111469|ref|XP_004291970.1|	PREDICTED: U2 snRNP-associated SURP motif-containing protein-like [Fragaria vesca subsp. vesca]	39.25	9e-96	sp|Q5R7X2|SR140_PONAB	U2 snRNP-associated SURP motif-containing protein OS=Pongo abelii GN=U2SURP PE=2 SV=1	84.59	0	F6H346	F6H346_VITVI Putative uncharacterized protein OS=Vitis vinifera GN=VIT_04s0008g06810 PE=4 SV=1	YBR212w	64.3	6e-10	COG0724	RNA-binding proteins (RRM domain)	R	General function prediction only ;	K12842|1|0.0|1186|tcc:TCM_036891|EC[not_get]	metabolic_process		binding
334	Cotton_D_gene_10002197	locus=scaffold381:301201:303482:+ [translate_table: standard]	28905.9	0.156	2|1|2	3|1|3	CotAD_57476;CotAD_08501/CotAD_57476;CotAD_08501/CotAD_57476;CotAD_08501	Cotton_D_gene_10002197	MFIWICRFGSSKRIQSCGYTKSAKNNYYKKPTGHPVVNVETQASRSSGAYIIPPIILGFGGLLAFLHYNDERRAVKIGKDSYTGSDTAAAPIIGGPFTLVNSENQIVNEQDFLGNWVLLYFGYTSSPDIGPDQVRIMAKAIDTLESKENLKVLPVFVTIDPQRDTPAQLRAYLKEFDPRIVGLGGPVSAVRQMAQEYRVYFKKVEEEGDDYLVESSHSMYLINPKMKVVRCFGVEYNAEQLSKEILKELKKHQVNA	67.21	2e-107	gi|224081158|ref|XP_002306313.1|	predicted protein [Populus trichocarpa]	60.54	2e-98	sp|Q8LAL0|SCO12_ARATH	Protein SCO1 homolog 2, mitochondrial OS=Arabidopsis thaliana GN=HCC2 PE=2 SV=1	67.21	3e-106	B9H537	B9H537_POPTR Predicted protein OS=Populus trichocarpa GN=POPTRDRAFT_715909 PE=4 SV=1	DR0597	63.5	2e-11	COG1999	Uncharacterized protein SCO1/SenC/PrrC, involved in biogenesis of respiratory and photosynthetic systems	R	General function prediction only ;	K07152|1|6e-141|399|tcc:TCM_001137|EC[not_get]	-	-	-
335	CotAD_63780	locus=Dt_chr9:47591940:47594341:- [translate_table: standard]	49034.8	0.02	1|-|1	2|-|1	Cotton_D_gene_10008318;CotAD_07387/-/Cotton_D_gene_10008318;CotAD_07387	CotAD_63780	MGGAAVTIALQQLKGLLGIKNFTKDTDIISVMKSVWSNVEHGWNWQTIVIGVSCLSCLLFAKYIGKRNKKFFWVPAIAPLISVVLSTFFVFITHAEKQGVVIVKHIEKGINPSSVNQIYFTGEYLVKGMRIGVIAGMIALTEAAAIGRTFAAMKDYQIDGNKEMVALGTMNIVGSMTSCYIATGSFSRSAVNFMAGCETAVSNIVMSCVVFLTLEFITPLFKYTPNAILAAIIISAVAGLLDFEAAILIWKIDKFDFLACMGAFLGTVFSSVEIGLLIAVIISFAKILLQVTRPRTAILGKLPGTTVYRNIQQYPEATKVPGILIVRVDSAIYFSNSSYVRERILRWLMDEEEQVKAECQSTMQFVIIEMSPVTDIDTSGIHALEELHSSLQKKNIQLI…	83.97	0	gi|255545634|ref|XP_002513877.1|	sulfate transporter, putative [Ricinus communis]	73.35	0	sp|P53392|SUT2_STYHA	High affinity sulfate transporter 2 OS=Stylosanthes hamata GN=ST2 PE=2 SV=1	83.97	0	B9RJF8	B9RJF8_RICCO Sulfate transporter, putative OS=Ricinus communis GN=RCOM_1033950 PE=4 SV=1	CPn1014	76.3	3e-14	COG0659	Sulfate permease and related transporters (MFS superfamily)	P	Inorganic ion transport and metabolism ;	K17470|1|0.0|756|tcc:TCM_034964|EC[not_get]	localization single-organism_process	membrane membrane_part	transporter_activity
336	CotAD_16235	locus=Dt_chr13:43147547:43149469:+ [translate_table: standard]	28745.9	0.356	5|5|6	16|11|12	Cotton_D_gene_10008868/Cotton_D_gene_10008868/Cotton_D_gene_10008868	CotAD_16235	MGKGPGLYTDIGKKARDLLYKDYQADHKFTLTTYTSNGVAITSTGTKKGELLLADISTELKNKNITTNVKLFATVTVDEPAPGLKTIFSFIAPDQRSGKVELQYQHEYAGISTSIGLTANPLVNFSGVVGNNSVTVGTDLSFDTASGNFTKLNAGLNFTHSDLIASLTLNDKGDTLNASYYHIVSPLTNTAVGAELSHSFSSNENTLTIGTQHALDPLTTVKARLNNYGRASALIQHEWRPKSLITISGEVDTGAIEKSAKVGLALALKP	83.7	1e-158	gi|255558216|ref|XP_002520135.1|	voltage-dependent anion-selective channel, putative [Ricinus communis]	79.71	2e-151	sp|P42056|VDAC2_SOLTU	Mitochondrial outer membrane protein porin of 36 kDa OS=Solanum tuberosum PE=1 SV=2	83.7	2e-157	B9S2B6	B9S2B6_RICCO Voltage-dependent anion-selective channel, putative OS=Ricinus communis GN=RCOM_0697980 PE=4 SV=1	-	-	-	-	-	-	-	K15040|1|4e-163|456|cic:CICLE_v10032366mg|EC[not_get]	biological_regulation localization regulation_of_biological_process single-organism_process	cell cell_part membrane organelle organelle_part	transporter_activity
337	CotAD_14856	locus=Dt_chr12:10752754:10753550:- [translate_table: standard]	20145.9	0.242	-|1|1	-|1|1	-/Cotton_D_gene_10007923/Cotton_D_gene_10007923	CotAD_14856	MNPQQPVLDVAPLNCVPYMGPTNADDMFSSPTKENTEAVEAIGPAMIFLPSQSTREELDNIMAATKNGVALTGAAATGSVGPVIGKVDIGELEDSYYFRVALPGVSMDKRDFNCDIEPDGKVVIKGMSTTGEKIVCKNFQIFHMLTQNLCPPGLFTASFQLPGPVNNEDAKSYLANGMLEAVVKRM	59.68	1e-73	gi|297848066|ref|XP_002891914.1|	hypothetical protein ARALYDRAFT_892730 [Arabidopsis lyrata subsp. lyrata]	-	-	-	-	59.68	2e-72	D7KPZ8	D7KPZ8_ARALL Putative uncharacterized protein OS=Arabidopsis lyrata subsp. lyrata GN=ARALYDRAFT_892730 PE=3 SV=1	-	-	-	-	-	-	-	-	-	-	-
338	CotAD_23386	locus=Dt_chr9:70480903:70482321:+ [translate_table: standard]	42315.3	0.029	-|1|-	-|2|-	-/Cotton_D_gene_10016000;CotAD_43384/-	CotAD_23386	MANLASKLQPWWLLLVIPFLFVSNTYHCVNAEPQVPCYFIFGDSLSDNGNNNNLATEAKVNYWPYGIDFPKGPTGRFTNGRTMQDIIVQLLGFQEFIPPFATSRGQEILKGVNYASGSAGILNESGQHLGVRISMDMQLSNHQSVISTIVEMLGKCAASKLLGKCMYAVQIGSNDYINNYFKPEMYNSSHLFTPEQYATYLIEQYSRKIKTLYNNGARMFALFGIGAIGCTPNAMAVHGTNGSACVEKMNTAAQLFNERLIPLVDELNSNSTDAKFTYLNPTGASAANSLGFTVANASCCDIGSGGDLCIPGSEPCGDRSQYVFWDAVHTSDAWNEVIAVEAYDSESNAIAYPFNVKKMAQLPNNNDADGDICEMGENSGVTV	50.54	8e-125	gi|225462452|ref|XP_002266118.1|	PREDICTED: GDSL esterase/lipase At5g45670 [Vitis vinifera]	50.83	3e-116	sp|Q9C7N5|GDL14_ARATH	GDSL esterase/lipase At1g29660 OS=Arabidopsis thaliana GN=At1g29660 PE=2 SV=1	50.54	1e-123	D7TJU3	D7TJU3_VITVI Putative uncharacterized protein OS=Vitis vinifera GN=VIT_10s0003g02120 PE=4 SV=1	all3634	51.6	1e-06	COG3240	Phospholipase/lecithinase/hemolysin	IR	Lipid transport and metabolism ; General function prediction only ;	K17604|1|5e-58|207|pop:POPTR_0012s13550g|EC[not_get]!K10960|2|3e-40|155|atr:18422248|EC[not_get]!K00679|3|8e-38|148|cic:CICLE_v10027727mg|EC[not_get]!K01188|4|3e-24|108|aly:ARALYDRAFT_316517|EC[not_get]!K01206|5|8e-23|101|brp:103852428|EC[not_get]	-	-	-
339	CotAD_64508	locus=At_chr6:45119475:45121964:+ [translate_table: standard]	31797.5	0.203	1|1|-	2|2|-	-/-/-	CotAD_64508	MESKEEVISVELPAPASWKKMFFPKKVGAPRKTEVMFIAPTGEEINNRKQLEQYLKSHSGNPPITEFDWGTGETPRRSARISGKAKATPTPEKEPLKKRGRKSSSAKKEDEEAEAVPEKPEGEKESEKEDTQAAEKETTEGEKGKDTSIDNQVENGSETLEADQTANMDAKIEDVKQEEAVVEENKDAVGVEETSTQMEVQEKPVAASCIDAPIEKPETMTSEANGDVEKENPNQTIPVPEGEVKEKSVQEAAGKCNVEVEDVEVNENGKLEPSVQTDAPQQPGPASVSC	48.76	7e-60	gi|255553181|ref|XP_002517633.1|	Nucleosome-binding protein, putative [Ricinus communis]	72.16	2e-46	sp|Q9XI36|MBD10_ARATH	Methyl-CpG-binding domain-containing protein 10 OS=Arabidopsis thaliana GN=MBD10 PE=1 SV=1	48.76	9e-59	B9RV64	B9RV64_RICCO Nucleosome-binding protein, putative OS=Ricinus communis GN=RCOM_0900000 PE=4 SV=1	-	-	-	-	-	-	-	-		cell cell_part organelle	binding
340	CotAD_49204	locus=At_chr12:20511717:20516227:- [translate_table: standard]	78014.2	0.065	1|1|-	2|2|-	CotAD_73337;Cotton_D_gene_10007827/CotAD_73337;Cotton_D_gene_10007827;CotAD_23973;Cotton_D_gene_10036573;CotAD_70266/-	CotAD_49204	MVLCTKLHRLDLRSTFFTSLRPSFTPNPSSSVSPKTFKFRPTKITAQVSTLSVETSVKDPESDIESLFSSNTEEIDRKRSNKQSNTGASGISSGVKLENISKSYKGVTVLKDVSWEVKKGEKVGLVGVNGAGKTTQMRIITGQEEPDSGNVIKAKSNMKIAFLNQEFEVSMSRTVREEFMSAFKEELDISDRLERVQKAIEGATEDLELMGRLLDEFDLLQRRAQAVDLDEVDAKVSKLMPELGFSPEDSDRLVASFSSGWQMRMSLGKILLQEPDLLLLDEPTNHLDLDTIEWLEGYLNKQDVPMVIISHDRAFLDQLCTKIVETDMGVSRTFEGNYSQFVEAKAAWVESQYAAWEKQQQEIEQTKDLINRLGAGANSGRASSAEKKLERLQEEGQIE…	82.7	0	gi|255576683|ref|XP_002529230.1|	abc transporter, putative [Ricinus communis]	80.41	0	sp|Q9LV93|AB5F_ARATH	ABC transporter F family member 5 OS=Arabidopsis thaliana GN=ABCF5 PE=2 SV=1	82.7	0	B9STB1	B9STB1_RICCO Abc transporter, putative OS=Ricinus communis GN=RCOM_0431660 PE=3 SV=1	L101706	290	1e-89	COG0488	ATPase components of ABC transporters with duplicated ATPase domains	R	General function prediction only ;	K06185|1|3e-65|229|cre:CHLREDRAFT_132213|EC[not_get]			binding catalytic_activity
341	CotAD_09205	locus=Dt_chr1:37853738:37857230:- [translate_table: standard]	44477.7	0.106	4|5|4	24|24|14	Cotton_D_gene_10038289;CotAD_04330/Cotton_D_gene_10038289;CotAD_04330/Cotton_D_gene_10038289;CotAD_04330	CotAD_09205	MTSLIITCLLFGFCSALKEGQTCVSDGNCDSGLHCETCVANGNVRPRCTRIQPVNPTSKVKGLPYNRYSWLTTHNSFARLGKKSATGSLILAPTNQQDSITDQLNNGVRGLMLDMYDFQNDIWLCHSFGGQCFNNTAFQPAINVLKEIQAFLEANPSEIVTIIIEDYVTSPRGLSKVFDAAGLRKFWFPVSRMPKNGGSWPTVDDMIQKNQRMVVFTSKSAKEASEGIAYQWRYMVENQYGNGGMIAGSCPNRAESPAMNATSRSLVLINYFPDIPDVTQACRHNSAPLISMMNTCHVAAGNRWPNFIAVDFYKRSDGGGAPEAIDVANGHLVCGCENIVICRANMTFGVCDMPEADISPAPATKPVAHDSSFANLESRPVPLQWLFISILVAILLQL	76.96	0	gi|356502505|ref|XP_003520059.1|	PREDICTED: PI-PLC X domain-containing protein At5g67130-like [Glycine max]	57.58	2e-141	sp|Q93XX5|Y5713_ARATH	PI-PLC X domain-containing protein At5g67130 OS=Arabidopsis thaliana GN=At5g67130 PE=1 SV=1	76.96	0	I1JE01	I1JE01_SOYBN Uncharacterized protein OS=Glycine max GN=Gma.53805 PE=4 SV=1	-	-	-	-	-	-	-	-	-	-	-
342	Cotton_D_gene_10029223	locus=scaffold96:2186205:2186450:- [translate_table: standard]	8335.34	0.123	-|1|-	-|1|-	-/CotAD_59299;CotAD_01183/-	Cotton_D_gene_10029223	MATGTAPPRGSAAAAANMRRRRTSSGAGASGGAAGTMLQFYTDDAPGLKISPNVVLVMSIGFIAFVAILHVMGKLYFVRKE	95.56	1e-25	gi|449431966|ref|XP_004133771.1|	PREDICTED: protein transport protein Sec61 subunit beta-like isoform 1 [Cucumis sativus]	93.02	4e-23	sp|P38389|SC61B_ARATH	Protein transport protein Sec61 subunit beta OS=Arabidopsis thaliana GN=At2g45070 PE=2 SV=1	100	2e-24	D7SLR7	D7SLR7_VITVI Putative uncharacterized protein OS=Vitis vinifera GN=VIT_15s0021g02620 PE=4 SV=1	-	-	-	-	-	-	-	K09481|1|3e-26|94.4|csv:101220008|EC[not_get]	-	-	-
343	CotAD_72906	locus=Dt_chr12:36631345:36631965:- [translate_table: standard]	22333.5	0.039	-|1|-	-|1|-	-/Cotton_D_gene_10014562;CotAD_73781/-	CotAD_72906	MPAVNGDSIRFFAEKRKLADLNSRDIAGILSGMEVAARTTVPVKGKALVKFRWGMRIPSDMKSXSGVGGIVDPKTGVSLTKIPFLVMDKIGIEHVDGTDSKQAISTVSKSGPGEAPNSDVAEACYTLKRQLEALQSENGLLKRAVEDLRREISGGKFGDLNSGKYREMEWDGISKSKKERRNNENKSMEGDLNEELKKALKGAAGA	57.72	7e-47	gi|470137227|ref|XP_004304371.1|	PREDICTED: uncharacterized protein LOC101292233 [Fragaria vesca subsp. vesca]	-	-	-	-	52.14	6e-39	B9HAC7	B9HAC7_POPTR Predicted protein OS=Populus trichocarpa GN=POPTRDRAFT_762842 PE=4 SV=1	-	-	-	-	-	-	-	-	-	-	-
344	Cotton_D_gene_10031773	locus=scaffold9:841895:843458:+ [translate_table: standard]	47244	0.455	3|2|2	15|7|5	-/-/-	Cotton_D_gene_10031773	MAGLAPEGSQFDARQYDQKMTELLQTDGDDFFTSYDEVYDSFDAMGLQENLLRGIYAYGFEKPSAIQQRGIVPFCKGLDVIQQAQSGTGKTATFCSGILQQLDYAMVQCQALVLAPTRELAQQIEKVMRALGDYLGVKVHACVGGTSVREDQRILQSGVHVVVGTPGRVFDMLRRQSLRPDYIKMFVLDEADEMLSRGFKDQIYDIFQLLPAKIQVGVFSATMPPEALEITRKFMNKPVRILVKRDELTLEGIKQFYVNVEKEEWKLETLCDLYETLAITQSVIFVNTRRKVDWLTDKMRSRDHTVSATHGDMDQNTRDIIMREFRSGSSRVLITTDLLARGIDVQQVSLVINYDLPTQPENYLHRIGRSGRFGRKGVAINFVTNDDERMLYDIQKFYN…	95.88	0	gi|283049400|gb|ADB07168.1|	DEAD-box RNA helicase-like protein [Prunus persica]	95.4	0	sp|P41382|IF410_TOBAC	Eukaryotic initiation factor 4A-10 OS=Nicotiana tabacum PE=2 SV=1	95.88	0	D2X5K2	D2X5K2_PRUPE DEAD-box RNA helicase-like protein OS=Prunus persica PE=2 SV=1	CAC0784	253	4e-80	COG0513	Superfamily II DNA and RNA helicases	LKJ	Replication, recombination and repair ; Transcription ; Translation, ribosomal structure and biogenesis ;	K03257|1|0.0|837|tcc:TCM_029076|EC[not_get]			binding catalytic_activity
345	CotAD_16219	locus=Dt_chr13:42792072:42793920:- [translate_table: standard]	29393.8	0.047	1|-|-	1|-|-	CotAD_30607;CotAD_74939;CotAD_62494;Cotton_D_gene_10008884;CotAD_30608;Cotton_D_gene_10037908;CotAD_30610;CotAD_71220;Cotton_D_gene_10037910/-/-	CotAD_16219	MGFAISDELLGTVVPIVVYWIYSGIYVCLGSFENYRLHSKADEDEKNLVSKQTVVKGVLLQQSVQAVVAILLFTLSGSDAGASAQQSSSFITLVRQFVTAMVVLDTWQYFLHRYMHENKFLYRHVHSLHHRLVVPYAFGALYNHPVEGLLGDTVGGALSFLLSGMSPRTSIFFFSFATIKTVDDHCGLMLPGNPFHIFFRNNSAYHDIHHQLYGTKYNFSQPFFVMWDRILGTYMPYSLEKRAEGGFEARPTKEFKDD	83.33	6e-134	gi|22330531|ref|NP_177122.2|	sphingoid base hydroxylase 1 [Arabidopsis thaliana]	83.33	2e-134	sp|Q8VYI1|SBH1_ARATH	Sphingoid base hydroxylase 1 OS=Arabidopsis thaliana GN=SBH1 PE=2 SV=1	79.07	7e-131	B9S8V4	B9S8V4_RICCO Sur2 hydroxylase/desaturase, putative OS=Ricinus communis GN=RCOM_0836090 PE=4 SV=1	PA0702	48.1	5e-06	COG3000	Sterol desaturase	I	Lipid transport and metabolism ;	K04713|1|4e-143|404|tcc:TCM_011723|EC[not_get]	cellular_process metabolic_process response_to_stimulus single-organism_process	cell cell_part organelle	catalytic_activity
346	Cotton_D_gene_10010491	locus=scaffold128:807896:809129:+ [translate_table: standard]	31163	0.389	1|1|1	13|12|9	CotAD_38076/CotAD_38076/CotAD_38076	Cotton_D_gene_10010491	MAAITNAAATSSFMGTRFPDVYTSSGRFVARFGFGGKKAAPKKVSKRTPDRPLWYPGAVAPDWLDGSLVGDYGFDPFGLGKPAEYLQYDLDSLDQNLAKNSAGEIIGTRTEVADVKATPFQPYSEVFGLQRFRECELIHGRWAMLATLGALTVEWLTGVTWQDAGKVELVEGSSYLGQPLPFSMTTLIWIEVLVIGFIEFQRNAELDPEKRLYPGGKYFDPLGLAADPEKKATLQLAEIKHARLAMVAFLGFAVQAAATGKGPLNNWATHLSDPLHTTIIDTFTS	98.25	0	gi|226358411|gb|ACO51068.1|	chloroplast chlorophyll A-B binding protein [Gossypium hirsutum]	90.76	3e-163	sp|Q07473|CB4A_ARATH	Chlorophyll a-b binding protein CP29.1, chloroplastic OS=Arabidopsis thaliana GN=LHCB4.1 PE=1 SV=1	98.25	0	C1K5D1	C1K5D1_GOSHI Chloroplast chlorophyll A-B binding protein OS=Gossypium hirsutum GN=CBP3 PE=2 SV=1	-	-	-	-	-	-	-	K08915|1|2e-177|493|tcc:TCM_021708|EC[not_get]	cellular_process metabolic_process	cell cell_part organelle
347	CotAD_05142	locus=Dt_chr7:14085478:14086671:- [translate_table: standard]	23688.1	0.411	1|-|-	1|-|-	Cotton_D_gene_10004694/-/-	CotAD_05142	MVKHNNVVPNGHFKKHWQNYVKTWFNQPARKARRRIARQKKAVRIFPRPTSGPLRPIVHGQTLKYNMKLRAGKGFTLEELKAAGISKKLAPTIGIAVDHRRKNKSLEGLQANVQRLKTYKAKLVVFPRQARKFKAGDSTAEELATATQVQGSYMPISREKPSVELVKVTEEMKSFKAYNKLRVERTNERHIGARLKKAAEAEKEDKK	91.79	6e-121	gi|255557935|ref|XP_002519996.1|	60S ribosomal protein L13, putative [Ricinus communis]	83.94	1e-110	sp|P41128|RL131_BRANA	60S ribosomal protein L13-1 OS=Brassica napus PE=2 SV=1	91.79	8e-120	B9S1X7	B9S1X7_RICCO 60S ribosomal protein L13 OS=Ricinus communis GN=RCOM_1323880 PE=3 SV=1	ECU03g0320	83.6	9e-20	COG4352	Ribosomal protein L13E	J	Translation, ribosomal structure and biogenesis ;	K02873|1|2e-124|352|tcc:TCM_002060|EC[not_get]	metabolic_process	cell cell_part macromolecular_complex	structural_molecule_activity
348	CotAD_43011	locus=Dt_chr7:23972575:23973066:- [translate_table: standard]	10482.1	0.149	1|-|-	1|-|-	-/-/-	CotAD_43011	MKPIVLESSWGTYCPGEYPSPPPEYETCLGDLYSVAWMEDRFQFSIFSLFHVSKNLVNKYKNQRQSSDIHNLRKETLHQQYELVWLF	60.26	9e-13	gi|1351408|sp|P49043.1|VPE_CITSI	RecName: Full=Vacuolar-processing enzyme; Short=VPE; Flags: Precursor	60.26	3e-13	sp|P49043|VPE_CITSI	Vacuolar-processing enzyme OS=Citrus sinensis PE=2 SV=1	65.38	4e-11	D2D489	D2D489_POPTO Vacuolar processing enzyme a OS=Populus tomentosa GN=VPEa PE=2 SV=1	-	-	-	-	-	-	-	K01369|1|3e-13|66.2|cit:102612763|EC[not_get]	-	-	-
349	CotAD_50809	locus=Dt_chr9:67993704:67996709:+ [translate_table: standard]	72615.6	0.046	2|1|-	3|1|-	Cotton_D_gene_10025952/CotAD_25636;Cotton_D_gene_10025952/-	CotAD_50809	MSAPLTPSKRPHDRNPSELNGKRKLQKSDQSKILSGGIVFRVLCPEAKSASVIGKDGTLISQILQETGANVKIEEAIPGCDEIVIAIMGSGSSDKDTEVGTVQGKEDGGDEADASNRSDEEKGNDENNNDKALKSVNENSRVQEALLLVFERMAETERNSDGVDKETETVKSFTTVLRLLVLSSQVGCLFGKGGSVIKQMSADSGAQIRILPRDKLPACASASYELVQIAGEFDAVRKALQSVSQQLIENPPRDHDSFPLNTTGQSSHSIGPRPEVHPPPNHSLSSQGAPFAAGPRDVEHHSPLPPHMPGRMMPSLEMLTFRLLCHDDKVGAVIGKGGAIIKTLKQETGCDIKVVEAIPDCEDRVIIVSSPAHPDDRISPAQDAVLRVLGRLFRAMPDG…	62.09	0	gi|225458964|ref|XP_002283591.1|	PREDICTED: KH domain-containing protein At4g18375-like [Vitis vinifera]	28.22	1e-41	sp|P58223|Y4837_ARATH	KH domain-containing protein At4g18375 OS=Arabidopsis thaliana GN=At4g18375 PE=2 SV=1	62.09	0	F6H152	F6H152_VITVI Putative uncharacterized protein OS=Vitis vinifera GN=VIT_18s0001g08280 PE=4 SV=1	-	-	-	-	-	-	-	K13162|1|0.0|994|tcc:TCM_034611|EC[not_get]	-	-	-
350	CotAD_44656	locus=Dt_chr6:27162826:27164184:+ [translate_table: standard]	23370.6	0.289	1|1|1	1|3|2	-/-/-	CotAD_44656	MYTSRKKIHKDKDAEPTEFEESVAQAFFDLENTNQDLKSDLKDLYINSAVQIDVSGSRKAVVVHVPYRLRKAFRKVHVKLVRELEKKFSGKDVILIATRRILRPPKKGSAVQRPRSRTLTAVHEAMLEDVVLPAEIVGKRTRYRIDGSKIMKANVLSFSATLFGQVYLDPKERNNTEYKLETFSAVYRKLAGKDVVFEFPVMEA	85.29	7e-125	gi|351727497|ref|NP_001235883.1|	uncharacterized protein LOC100527680 [Glycine max]	77.34	2e-113	sp|Q9ZNS1|RS7_AVIMR	40S ribosomal protein S7 OS=Avicennia marina GN=RPS7 PE=2 SV=1	85.29	9e-124	C6T530	C6T530_SOYBN Uncharacterized protein OS=Glycine max GN=Gma.55540 PE=2 SV=1	-	-	-	-	-	-	-	K02993|1|1e-127|360|tcc:TCM_012365|EC[not_get]	metabolic_process	cell cell_part macromolecular_complex	structural_molecule_activity
351	CotAD_04202	locus=Dt_chr5:13774061:13775796:- [translate_table: standard]	18495.5	0.101	1|-|1	2|-|2	Cotton_D_gene_10010118/-/Cotton_D_gene_10010118	CotAD_04202	MQEQGTSSIAASSLPSSSERSSSSALQVEVKEGMESDEEIRRVPEIGGEASAAPAAGREPGSLTRLDRPQPSGEGGQRKRGRSPADKENKRLKRLLRNRVSAQQARERKKAYLNELETRVRDLEKKNSELEERLSTLHNENQMLRQIVKNTTASRRGGNGSSNAADGTL	79.88	4e-60	gi|462424460|gb|EMJ28723.1|	hypothetical protein PRUPE_ppa012064mg [Prunus persica]	74.56	2e-50	sp|O24646|HY5_ARATH	Transcription factor HY5 OS=Arabidopsis thaliana GN=HY5 PE=1 SV=1	80.47	1e-58	B9IKV5	B9IKV5_POPTR Predicted protein OS=Populus trichocarpa GN=POPTRDRAFT_809109 PE=4 SV=1	-	-	-	-	-	-	-	K16241|1|4e-77|230|tcc:TCM_038392|EC[not_get]	cellular_process metabolic_process	cell cell_part organelle	binding nucleic_acid_binding_transcription_factor_activity
352	CotAD_21193	locus=At_chr11:69432837:69434384:+ [translate_table: standard]	13585.8	0.083	1|-|-	1|-|-	-/-/-	CotAD_21193	MAAEEGQVYGCHTIESWNEQLQKGNESEKLVVVDFTASWCGPCRFIAPFLAELAKKFPSVTFLKVDVDELKEVATDWAVEAMPTFMFLKEGKIVDKVVGAKKEELQQTLSKHMAVPSTTSA	85.34	3e-71	gi|119367477|gb|ABL67654.1|	putative H-type thioredoxin [Citrus hybrid cultivar]	83.05	2e-71	sp|Q43636|TRXH_RICCO	Thioredoxin H-type OS=Ricinus communis PE=3 SV=1	85.34	4e-70	A1ECK1	A1ECK1_9ROSI Thioredoxin OS=Citrus hybrid cultivar PE=3 SV=1	MA3212	68.2	1e-15	COG0526	Thiol-disulfide isomerase and thioredoxins	OC	Posttranslational modification, protein turnover, chaperones ; Energy production and conversion ;	K03671|1|3e-75|221|tcc:TCM_000279|EC[not_get]	biological_regulation cellular_process localization metabolic_process single-organism_process	cell cell_part	catalytic_activity
353	CotAD_17884	locus=scaffold120.1:1657806:1658884:+ [translate_table: standard]	33996	0.283	5|6|7	48|33|44	CotAD_31038;Cotton_D_gene_10022747/CotAD_31038;Cotton_D_gene_10022747/CotAD_31038;Cotton_D_gene_10022747	CotAD_17884	MVLSESFRSIQLPPNVTGPESIAFELATGRFYVGVTDGRILQYNGPTVGFVEFGSTGRNRTKTMCDGITDPDLGPMCGRPFGLGFHYATNQLYVCDAYLGLMVLGSGRRLATPLSTGVEGVPYRFCNGLDVHQLSGNVFFTDSTTNYDLRNASKGLESNDSTGRLLMYNPSNNRVTVLLKNLPGPAGVAVSQDGLYALVSNYNANNTIRFWLRGPRADTYEIINFQARPNNIQRTLVGDFWEAAAMVKQSTQTLVPIGQRISGLGLVLQTVNFERWYGNKLISEVQEFRDALYVASPDVDFIGIYSF	53.8	1e-113	gi|359491389|ref|XP_002274134.2|	PREDICTED: strictosidine synthase 1-like [Vitis vinifera]	38.41	9e-65	sp|P92976|STS3_ARATH	Strictosidine synthase 3 OS=Arabidopsis thaliana GN=SS3 PE=2 SV=2	53.8	1e-112	F6GTG1	F6GTG1_VITVI Putative uncharacterized protein OS=Vitis vinifera GN=VIT_17s0000g04600 PE=4 SV=1	mll1724_2	79.3	4e-16	COG3386	Gluconolactonase	G	Carbohydrate transport and metabolism ;	K01757|1|5e-67|215|brp:103852877|EC[not_get]	-	-	-
354	CotAD_55245	locus=Dt_chr3:18973096:18978148:+ [translate_table: standard]	58871.2	0.02	-|1|-	-|1|-	-/Cotton_D_gene_10024165/-	CotAD_55245	MASQSGSTRRSSSIVNLSSSRKKTPENGGSDSSRKFLQSSRPMGLAGERTVKKLRLSKALTVPDSTSIYEACRRMAARRVDALLLTDSNALLCGILTDKDIATRVIARELNLEETPVSKVMTKNPVFVLSDTLAVEALQKMVQGKFRHLPVVENGEVIALLDIAKCLYDAIARMERAAEKGKAIAAAVEGVEKNWGTSFSGHSTFIETLRERMFRPSLSTIITDNPKIVTVSPDDTVLAAAKKMLESRLNSAVVTVENKPRGILTSKDILMRVIAQNLPPETTLVEKVMTPNPECATIDTPIVDALHTMHDGKFLHLPVVDRDGEIVAVFDVIHITHAAVATLSQVGSTSGVNNEATTTMMQKFWDSAMALPPTEEDDETQSRSDGAETGRSLPYPSSN…	80.15	0	gi|359491097|ref|XP_003634219.1|	PREDICTED: CBS domain-containing protein CBSCBSPB5-like isoform 2 [Vitis vinifera]	72.67	0	sp|P0DH79|Y5064_ARATH	CBS domain-containing protein CBSCBSPB5 OS=Arabidopsis thaliana GN=CBSCBSPB5 PE=2 SV=1	80.15	0	D7SH03	D7SH03_VITVI Putative uncharacterized protein OS=Vitis vinifera GN=VIT_17s0000g01200 PE=4 SV=1	BH3742	56.6	7e-08	COG2905	Predicted signal-transduction protein containing cAMP-binding and CBS domains	T	Signal transduction mechanisms ;	K13436|1|3e-10|63.2|cam:105851362|EC[not_get]	-	-	-
355	Cotton_D_gene_10035997	locus=scaffold22:265935:266792:+ [translate_table: standard]	31304.1	0.046	1|-|-	1|-|-	CotAD_54740;CotAD_43322/-/-	Cotton_D_gene_10035997	MRLYAPDQPSLQALRGTNIELMLGVPNSDLQRIAASQANANIWVQNNVRNFGNVKFRYIAVGNEVQPSDPAAQFLVPAMQNIRNAIVAAGLGNQIIVSTAIDTGALGESYPPSKGSFRPQYRPLLDPIIRFLVNNRAPLLANVYPYFSYDANSVISLDYAVFRSQSPVVSDPPLLYRNLFDAILDAIYAALEKAGGGSLEVVVSESGWPSAGGGARGATNIDNARTYNQNLIQHVKGGTPKRPGRPIETYIFAMFDENTKQGKEIERHWGLFFPNKQPKYPINFN	72.38	3e-150	gi|2274915|emb|CAA03908.1|	beta-1,3-glucanase [Citrus sinensis]	68.88	2e-137	sp|P52408|E13B_PRUPE	Glucan endo-1,3-beta-glucosidase, basic isoform OS=Prunus persica GN=GNS1 PE=3 SV=1	72.38	4e-149	O23783	O23783_CITSI Beta-1,3-glucanase (Precursor) OS=Citrus sinensis GN=gns1 PE=2 SV=1	YGR282c	53.5	1e-07	COG5309	Exo-beta-1,3-glucanase	G	Carbohydrate transport and metabolism ;	K15429|1|4e-51|183|cic:CICLE_v10007363mg|EC[not_get]!K19619|2|1e-50|181|crb:CARUB_v10012467mg|EC[not_get]!K10761|5|2e-45|167|cic:CICLE_v10027573mg|EC[not_get]	-	-	-
356	CotAD_06039	locus=Dt_chr13:24502867:24507244:+ [translate_table: standard]	137985	0.01	1|-|-	2|-|-	Cotton_D_gene_10039816/-/-	CotAD_06039	MVSKDGMFRYADNVDKLLMFFGTLGSIGDGLQYPLTMLVLSKVINEYGDPNAKLSNDTVDKYALRLLYVAIVVGLSAFVEGVCWTRTAERQTSRIRTEYLKSVLRQEVGFFDTQETGTSMTFQVVSTISADANAIQVAICDKIPNCLAFLSTFFFCLIVSFILSWRITLAAIPLTLFFIVPGLVFGKLMMDVIMKMIESYGVAGGIAEQAISSIRTVYSYVAENQTIENFSHALERTLELGVKQGFAKGLLMGSMGSIYVGWAFQAWVGTYLVTEKGEKGGSVFAAGINVVMGGLSVLGALPNLTGITEATVAATRIFEMVNRVPSIDADDRKGKALSYVRGEIEFKDIYFSYPSRPDSSVLQGLNIRIPAGKSVGLVGGSGSGKSTTIALLQRFYDPT…	78.13	0	gi|224124238|ref|XP_002319279.1|	multidrug/pheromone exporter, MDR family, ABC transporter family [Populus trichocarpa]	52.7	0	sp|Q6YUU5|MDR_ORYSJ	Putative multidrug resistance protein OS=Oryza sativa subsp. japonica GN=Os02g0190300 PE=3 SV=1	78.13	0	B9I7G6	B9I7G6_POPTR Multidrug/pheromone exporter, MDR family, ABC transporter family OS=Populus trichocarpa GN=POPTRDRAFT_571482 PE=3 SV=1	TM0288	271	4e-78	COG1132	ABC-type multidrug transport system, ATPase and permease components	V	Defense mechanisms ;	K05658|1|0.0|2295|tcc:TCM_031084|EC[not_get]	cellular_process localization metabolic_process single-organism_process	membrane membrane_part	binding catalytic_activity transporter_activity
357	CotAD_76598	locus=scaffold4295.1:45732:46512:- [translate_table: standard]	17056.9	0.387	4|1|2	19|6|8	CotAD_69975;Cotton_D_gene_10029341/CotAD_69975;Cotton_D_gene_10029341/CotAD_69975;Cotton_D_gene_10029341	CotAD_76598	MAAADVEFRCFVGGLAWATDDRALEEAFSAFGEIVESKIINDRETGRSRGFGFVTFRDEKAMRDAIEGMNGQNLDGRNITVNEAQSRRSGGGGGGFGGGNGGYSRGGGGGGYGGRQGGYGGGRREGGYGNGGGYGGGGYGGGRREGGYGDGGSRYSRGGGASEGNWRS	100	4e-55	gi|211906474|gb|ACJ11730.1|	glycine-rich RNA-binding protein [Gossypium hirsutum]	83.53	4e-47	sp|P49310|GRP1_SINAL	Glycine-rich RNA-binding protein GRP1A OS=Sinapis alba PE=2 SV=1	100	5e-54	D2D310	D2D310_GOSHI Glycine-rich RNA-binding protein OS=Gossypium hirsutum PE=2 SV=1	alr0741	46.2	1e-06	COG0724	RNA-binding proteins (RRM domain)	R	General function prediction only ;	K13195|1|3e-46|150|gmx:100797231|EC[not_get]!K12885|4|8e-36|124|smo:SELMODRAFT_18499|EC[not_get]			binding
358	CotAD_47080	locus=Dt_chr11:33247576:33254058:- [translate_table: standard]	60644.7	0.011	-|-|1	-|-|2	-/-/-	CotAD_47080	MAISPLLHPKPRGLHFNARGLIRSTNCYSFSSFSSGGSQKFSFLKGLKASKGGKAGDKEPQKESGTWFKGILSNIKQTMLECPLFQKSNARETSDSKVDTEASEVTVTENKGVSSGSTSDTIGGNAFEGPVVNATSELHQIHYNPYKVGLSDIQMVENSLKMNKPKRLSDIFVKMLENDVEGFEGAKSDVLGPTSEKLHASSKRSSRIEDLMKVINREKNDPTAGEMAGILRDSLASTESSKGNKIEKEKNSDLSEIMNYLPGNRTATSVQRPSATTISGKKHALSKSSSRIEDLMKVINREKSDPTAGEWQSSDVERSHTLLESTIKDWERTILNVTDQLSKNVWGAANLRNSDVKRRHTLLKHHMSSGNISLDIKKESSIPTESISDKEDSNLDLAN…	42.86	4e-21	gi|462421050|gb|EMJ25313.1|	hypothetical protein PRUPE_ppa015679mg [Prunus persica]	-	-	-	-	26.72	2e-14	B9HSG1	B9HSG1_POPTR Predicted protein OS=Populus trichocarpa GN=POPTRDRAFT_768868 PE=4 SV=1	-	-	-	-	-	-	-	-	-	-	-
359	CotAD_43157	locus=Dt_chr12:29911573:29911728:- [translate_table: standard]	5897.04	0.118	-|-|1	-|-|1	-/-/-	CotAD_43157	MVSTGSLKRHRDNGLPTLWSYTLTMDIDLSFKATPCKRFIGPLRRHCVNGL	-	-	-	-	-	-	-	-	-	-	-	-	-	-	-	-	-	-	-	-	-	-	-
360	Cotton_D_gene_10026277	locus=scaffold146:2717274:2736501:+ [translate_table: standard]	544432	0.006	1|2|1	1|2|2	CotAD_47546;CotAD_70313/CotAD_47546;CotAD_70313/CotAD_47546;CotAD_70313	Cotton_D_gene_10026277	MADHLTRLCQFLAEEKLSSSSSSLDLLLKLRSDESIKLGLQQLYLILQTGLHPIEPGSHPLFKSWSDNQILSLASLGSCITSVFRSLSVEQLEPIIVAVARKLVEFTVSFLGKSDFGGDDLSLQSNMIQLLEIILGGGTDKIVDSLQPASVNSLVDLLPIVSCNLGSIELDNDIKCGLQGMKCSRAEKQVDRLLSALASEWVQPERHTSGFEAPSFHQDLNSLVFLSQHWAVAHAECIRCLILLCKELVELPDIFDERIAGANFRKRLSFSLRILKSLGCLLKDVPYVEYDSSVLEAIASCADVLPNLFRPSFEFVNNIAVTEGNFESLVLSLLEEFIHLVRVMFCNSVVFQNVQACIVASILEHLGPSIWRYNKAASNIKPPLAYFPRSVIYTLKLIQ…	78.18	0	gi|359488327|ref|XP_003633742.1|	PREDICTED: LOW QUALITY PROTEIN: auxin transport protein BIG-like [Vitis vinifera]	69.11	0	sp|Q9SRU2|BIG_ARATH	Auxin transport protein BIG OS=Arabidopsis thaliana GN=BIG PE=2 SV=2	78.43	0	F6GVU9	F6GVU9_VITVI Putative uncharacterized protein OS=Vitis vinifera GN=VIT_14s0083g00960 PE=4 SV=1	-	-	-	-	-	-	-	K10691|1|0.0|8318|tcc:TCM_019010|EC[not_get]	-	-	-
361	CotAD_17142	locus=At_chr6:51954016:51960015:- [translate_table: standard]	44763.9	0.02	-|-|1	-|-|1	-/-/CotAD_31580;Cotton_D_gene_10020495	CotAD_17142	MPNIVSEAGLQTRAGQWWDSIPFLTSAVVIVCGVIYLICILVGYDSFYEVCFLPEAIVSHFQVYRIYTSIIFHGSLLHVLFNMLALVPLGSELERIMGSIRLLYTIILLATSNAIFHLIIALVVAHNPFHPFEHLMNECAIGFSGILFSMIVIETSLSGVQSRSVFGLFNVPAKWYAFILLVVFQLLMTNVSLLGHLCGILSGFAYTFGLFNFLIPGPSFYTAIESSSWLASCVRRPKFILCSGGNPSAYIPTYTAQNSPSSALFSGNIWRNLSSWMPQRGTTAQPAQDDPRFPGRGRTLGSVQNTAVNSDSNLQARLLDNSRPTSPSDIAAAGAGERLSNERQLQVSDAVAVGAGGYPLPQMPQVASEEQIQKLLSMGFERTQVEVAIAAADGDLNVA…	76.59	0	gi|224091513|ref|XP_002309277.1|	predicted protein [Populus trichocarpa]	67.8	0	sp|Q8LB17|Y3846_ARATH	Uncharacterized protein At3g58460 OS=Arabidopsis thaliana GN=At3g58460 PE=1 SV=2	76.59	0	B9H9X7	B9H9X7_POPTR Predicted protein OS=Populus trichocarpa GN=POPTRDRAFT_831984 PE=4 SV=1	SA1379_1	50.1	3e-06	COG0705	Uncharacterized membrane protein (homolog of Drosophila rhomboid)	R	General function prediction only ;	K09651|1|8e-54|183|csl:COCSUDRAFT_22068|EC[not_get]		membrane membrane_part	catalytic_activity
362	Cotton_D_gene_10025775	locus=scaffold24:485573:488561:- [translate_table: standard]	44202.5	0.077	1|2|1	1|2|1	CotAD_47412/CotAD_47412/CotAD_47412	Cotton_D_gene_10025775	MESELKDLNSKPAKIQQPDPTHDDTSSKDDRPLLKPDSSSTAAANIHELEKKFAAYVRNDVYGTMGRGELPLKEKIMLGISLVTLLPLRIVFGMSLVVVYYMICRICTMFSAPNQEEEEEGYAHLGGWRRAVIVRSGRFLSRSLLFVVGFYWITETHKDSANTKENSKTEGTHQLEEQEKPGAIVSNHVSYLDILYHMSSSFPSFVAKRSVAKIPLVGLISKCLGCVYVQRESKSSDFKGVAGVVTDRVREAHRNGSAPMMLLFPEGTTTNGDYLLSFKTGAFLAGAPVVPVILRYPYQRFSPAWDSITGVRHVVFLLCQFVNHMEVMHLPTYYPSQQEKDDPKLYANNVRRLMATEGNLIMSDIGLAEKRIYHAALNGNNRLPSVLHQKDD	73.43	0	gi|462419779|gb|EMJ24042.1|	hypothetical protein PRUPE_ppa006689mg [Prunus persica]	30.99	4e-39	sp|Q1LWG4|PCAT1_DANRE	Lysophosphatidylcholine acyltransferase 1 OS=Danio rerio GN=lpcat1 PE=2 SV=1	72.89	0	B9MVD8	B9MVD8_POPTR Predicted protein OS=Populus trichocarpa GN=POPTRDRAFT_591825 PE=4 SV=1	YPO0672	52	5e-07	COG0204	1-acyl-sn-glycerol-3-phosphate acyltransferase	I	Lipid transport and metabolism ;	K13510|1|0.0|654|tcc:TCM_033997|EC[not_get]	-	-	-
363	Cotton_D_gene_10015712	locus=scaffold297:1229295:1235425:+ [translate_table: standard]	92278.2	0.072	4|2|-	7|2|-	CotAD_58659;CotAD_74814/CotAD_58659;CotAD_74814/-	Cotton_D_gene_10015712	MESRSRLSSMLSYAIFLVTLSGLATLSDSTQQAFKRDPGLPHWHHSAFLEVRDSVRSDVRRTLHTRAEVPFQVPLEVNVVLIGLNGDGGYRYNVDSQKLEEFLRVSFPSHRPSCLETEEPLDIEHHVVYNTFPAGQPELIALEKALKGVMVPAGSAREPDFGREVPLFEVEATAVEPVFQKLYSYIFDIKSGGYSAKEMDRPVPTAIFIVNFDKVRMDPRNKEVDLDSLMYSKLTPLTNEEMKQQEGDYIYRYRYNGGGASQVWLSSGRFVVIDLSAGPCTYGKIETEEGSVSPRTLPRIRSILFPGGLASVSNRATHDNFMGHLAALVATTVEHVIAPDVRFETVDLTTRLLIPIIILQNHNRYNIMVKGHNYSIDIEAIEAEVKKLVHDDQEVVIIG…	82.32	0	gi|359477212|ref|XP_002273166.2|	PREDICTED: uncharacterized protein LOC100258488 [Vitis vinifera]	-	-	-	-	82.32	0	D7SYJ8	D7SYJ8_VITVI Putative uncharacterized protein OS=Vitis vinifera GN=VIT_05s0077g00820 PE=4 SV=1	-	-	-	-	-	-	-	-	-	-	-
364	CotAD_25941	locus=Dt_chr11:28720470:28728087:- [translate_table: standard]	53862.8	0.375	1|1|1	5|1|1	-/-/-	CotAD_25941	MARKMLVDGDLNQTNNEGAEYDFDLFVIGAGSGGVRAARFSANYGAKVGICELPFHPISSEVIGGVGGTCVIRGCVPKKILVYGATFGGEIEDARNYGWEVNEKLDFNWKKLLQKKTDEINRLNGIYKRLLSNASVKLLEGEGKIVGPNKVEVTQPDGTKLSYSAKHILIATGSRAHRPPIPGQELAITSDEALSLDDLPKRAVVFGGGYIAVEFASIWRGLGATVDLFYRKELPLRGFDDEMRAVVARNLEGRGIKLHPQTNLMELVKTDNGIKVITDHGGELIADVVLFATGRLPNTKRLNLEAVGVEIDKTGAVKVDEYSRTNIPSIWAVGDVTNRMNLTPVALMEGTCFATTVFGGESSKPDYRNIPCAVFSIPPLSIVGLSEEEAIEQVNGDVL…	87.7	0	gi|224057577|ref|XP_002299276.1|	glutathione reductase [Populus trichocarpa]	82.13	0	sp|Q43621|GSHRC_PEA	Glutathione reductase, cytosolic OS=Pisum sativum PE=2 SV=1	87.7	0	B9GME7	B9GME7_POPTR Glutathione reductase OS=Populus trichocarpa GN=PtrcGR2 PE=3 SV=1	SPBC17A3.07	277	2e-87	COG1249	Pyruvate/2-oxoglutarate dehydrogenase complex, dihydrolipoamide dehydrogenase (E3) component, and related enzymes	C	Energy production and conversion ;	K00383|1|0.0|932|tcc:TCM_020353|EC[not_get]	biological_regulation cellular_process metabolic_process single-organism_process	cell cell_part	binding catalytic_activity
365	CotAD_19359	locus=Dt_chr11:11370156:11372489:- [translate_table: standard]	22435.6	0.127	1|1|1	3|2|2	-/-/-	CotAD_19359	MEPLTTSLTHSISTLPPIRFSASAPCLPPPQLSVSTARHLRSRVLRFSNLLPKATTSEEASSTGPNRYFGEDRDRVVTVEEVPAVGNNNVFNEKLPLGEPKVESAADEDSQMFDFLEKLNIKLDSGDGYSIILYGTGALFALWLASSLVGAIDSIPLFPKLMEVVGLGYTVWFSSRYLLFKKSREELGTKIEELKQQVLGSEDG	61.64	1e-56	gi|359495653|ref|XP_003635047.1|	PREDICTED: uncharacterized protein LOC100853187 isoform 1 [Vitis vinifera]	49.02	5e-26	sp|O04616|Y4115_ARATH	Uncharacterized protein At4g01150, chloroplastic OS=Arabidopsis thaliana GN=At4g01150 PE=1 SV=1	61.64	2e-55	D7SSS3	D7SSS3_VITVI Putative uncharacterized protein OS=Vitis vinifera GN=VIT_00s0199g00150 PE=4 SV=1	-	-	-	-	-	-	-	-	-	-	-
366	CotAD_56446	locus=At_chr2:16966579:16967238:+ [translate_table: standard]	16000.3	0.259	1|2|2	1|3|3	Cotton_D_gene_10028773;CotAD_29116/Cotton_D_gene_10028773;CotAD_29116/Cotton_D_gene_10028773;CotAD_29116	CotAD_56446	MGVQDYAESKLKPSVDLTGSAKECSNGPSIGVIDIGVSQSAFLFRVALPGIRSDQSKLKCEIQRDGKVLIQGIVTQGSEVLQGLSSVCQMTVEKLCSPGPFTISFNLPGPVDPRLISPKFRPDGILEVVVMRYRRPSDPVDAWAPPS	61.59	6e-55	gi|224054659|ref|XP_002298345.1|	predicted protein [Populus trichocarpa]	-	-	-	-	61.59	8e-54	B9GJA0	B9GJA0_POPTR Predicted protein OS=Populus trichocarpa GN=POPTRDRAFT_815335 PE=4 SV=1	-	-	-	-	-	-	-	-	-	-	-
367	CotAD_29685	locus=At_chr13:22261284:22264190:+ [translate_table: standard]	36270.5	0.158	1|-|-	1|-|-	-/-/-	CotAD_29685	MSSCSSSSFSLLKPLTFPSTPCPSPALLFHNNPIYIPFKTTANHSKTLHLSKRLTIPFALTESDSPKSLQPDLQTLLQQLADSFDLPSDYFSQLPNDLRLDLNDAAFDLSNGPVIDECGMELGKTLLNLSRAWESADTSTSYALASKVPLLANSLTDSAKSAFGRRLVAAGRRFQAMGQYGQGELQKIAKAMNAAGKLLPASSMSATTEEQPKTETRMFKFGELQVEVTSEKANIGAAIGFVFGILSWQIAQGIQSIPESSLEYANDNALLLAKTTKVRGKVTFFKLSCTNFTCELARLDNELPPGIMASRIRKAAIRPVLQNYQIPTCC	72.08	3e-121	gi|225430613|ref|XP_002266617.1|	PREDICTED: uncharacterized protein LOC100251819 [Vitis vinifera]	-	-	-	-	72.08	5e-120	F6HI12	F6HI12_VITVI Putative uncharacterized protein OS=Vitis vinifera GN=VIT_04s0043g00380 PE=4 SV=1	-	-	-	-	-	-	-	K03320|1|6e-117|359|cit:102627368|EC[not_get]!K07573|2|4e-112|352|vvi:100263947|EC[not_get]	-	-	-
368	CotAD_35439	locus=At_chr12:44479879:44486714:+ [translate_table: standard]	56836.4	0.039	2|-|-	2|-|-	CotAD_74995;Cotton_D_gene_10013438/-/-	CotAD_35439	MDEEFSLDDPTQLLESASDFAHHPGSLNDAAVKDFLDRFPLPTKSDVPGLENTLVACLERVFKTKYGASLIPQYMTFVQVGLKADSQIVRCLSCKTVSSFLKNFDDKSIYAIKLIIDCDIYPLLLDCRVNGDEQVATAAIDAIKNLAQFPEAMGIIFPSNFNEATHLGNVASRCSSLGRVRVLSLIVKLFSISSSIASVIYNSNLLSLLETEIKNSNDTLVTLSALELLYELTEVQHGAQFLARTTFQLLHSIISNSSMESILRSRALMISGRLLSKENIYMFVDEPSAKSLISAIDVRLGLLDSQDTDERESALEALGGIGSSIQGAVLLLTSFPPAARHIVHAAFDRQGGGKQLAALHALGNIVGENRPEDGVILNGDAEESLRRLVYEVASESSKL…	70.99	0	gi|302142965|emb|CBI20260.3|	unnamed protein product [Vitis vinifera]	-	-	-	-	70.99	0	E0CSG1	E0CSG1_VITVI Putative uncharacterized protein OS=Vitis vinifera GN=VIT_19s0014g02210 PE=4 SV=1	-	-	-	-	-	-	-	K06692|1|0.0|894|tcc:TCM_046872|EC[not_get]		macromolecular_complex
369	CotAD_09374	locus=Dt_chr7:20023392:20024796:+ [translate_table: standard]	25651.1	0.333	3|1|2	6|3|3	-/-/-	CotAD_09374	MAGELVLLDFWPSPFGMRSRIALAEKGIPYEYREEDLRNKSDLLLQMNPVHKKIPVLIHNGKPVCESVIQVQYIDEVWHDKAPLIPSDPYQRAVARFWVDFVDKKIYDLGSKIWKTKGEEQANAKKEFIECLKLLEGELGDKTYFGGESLGYVDVALVPFYTWFYAYEKCGDFSIEAECPKMIAWVKRCMQKESVAKSLPDQEKVYEFVLQLKKLFGIE	83.56	3e-138	gi|29419702|gb|AAO61854.1|	glutathione S-transferase U1 [Malva pusilla]	74.19	5e-120	sp|Q03666|GSTX4_TOBAC	Probable glutathione S-transferase OS=Nicotiana tabacum PE=2 SV=1	83.56	4e-137	Q84VH2	Q84VH2_MALPU Glutathione S-transferase U1 OS=Malva pusilla PE=2 SV=1	mll0559	50.1	4e-07	COG0625	Glutathione S-transferase	O	Posttranslational modification, protein turnover, chaperones ;	K00799|1|2e-142|399|tcc:TCM_032364|EC[not_get]			catalytic_activity
370	CotAD_45990	locus=scaffold544.1:738817:741400:- [translate_table: standard]	83482	0.02	2|-|-	4|-|-	CotAD_42790/-/-	CotAD_45990	MESKPFFRFLFFFIAIAFLFAWTHLHYAPSPGVTTLLDCASNSPWCTSSKNRLQSKQPTLTKTPRASTSQRRHHESAVPRHPLDPLTVQEFNKVRKILSSHALFKSSNNYALHSVVLEEPNKELVLKWKKGQPLFPRIASVIARANGVSHVLTVNLETDEVTVLNTAPPTGYPTMTMEDMTSATWAPLSNAKFNRTIIERGVNLKDVACLPISLGWFGKKEENRRLIKVQCYSMEDTANFYMRPIEGLTVLLDMDTKEVVEVSDTGRSIPIPKATNTDYRFSEQKLQQDLNSINPISIEQPKGPSFVIEDEHLVKWANWEFHLKPDTRAGVMVSRAKVRDLESGVLRDVMYKGFTSELFVPYMDPTDAWYFKTYMDAGEYGFGLQAMPLDPLNDCPRNA…	81.54	0	gi|255537059|ref|XP_002509596.1|	Amine oxidase [copper-containing] precursor, putative [Ricinus communis]	61.27	0	sp|Q8H1H9|AMO_ARATH	Primary amine oxidase OS=Arabidopsis thaliana GN=At1g62810 PE=2 SV=1	81.54	0	B9RBR2	B9RBR2_RICCO Amine oxidase OS=Ricinus communis GN=RCOM_1679960 PE=3 SV=1	DRB0101	141	5e-37	COG3733	Cu2+-containing amine oxidase	Q	Secondary metabolites biosynthesis, transport and catabolism ;	K00276|1|0.0|1347|tcc:TCM_016065|EC[not_get]	metabolic_process		binding catalytic_activity
371	CotAD_20002	locus=At_chr6:49869229:49871193:- [translate_table: standard]	71291.7	0.017	-|-|1	-|-|1	-/-/Cotton_D_gene_10036026;CotAD_13565;CotAD_20003	CotAD_20002	MRSSIYGISFFFLFCIFPLVSGQLASKQSNTMITVSHQLANSSWNVEKEQNPCLWEGVTCNAPHNDSILSLSLSGFGLSNSSFLPLLCQINSLQSLDFSSNLFNSIPVEFFNSCGEIDGLKSLNFSKNMLVGSLPTFQKFVGLESLDLSFNSLNGSIDSQLNGLSALKSLNLSFNHLTGSVPSRLGKSRVLEQFELSLNRFTGEIASEIGEHGNLIKIDLSGNHLNGIIPESFVNLTKLETLILSSNQLHGAIPAGLLGITTLQRFSANHNNFVDLPSTNPSMSLKILDLSYNKITGRILPQLLLGSNLQTVDLSYNMLTGPIPVTISSSLVRLRLGSNYLSGPIPSTSFVSLPSLTYLELDNNSFTGTIPPQIGSNRKLALLNLAQNKLNGTLPDELL…	58.99	2e-177	gi|255571792|ref|XP_002526839.1|	protein with unknown function [Ricinus communis]	38.38	1e-58	sp|Q9LHP4|RCH2_ARATH	Receptor-like protein kinase 2 OS=Arabidopsis thaliana GN=RCH2 PE=1 SV=1	58.99	3e-176	B9SLH0	B9SLH0_RICCO Putative uncharacterized protein OS=Ricinus communis GN=RCOM_0686670 PE=4 SV=1	ECU11g0170	49.7	6e-06	COG4886	Leucine-rich repeat (LRR) protein	S	Function unknown ;	K13420|1|6e-60|221|obr:102718082|EC[not_get]	-	-	-
372	Cotton_D_gene_10001935	locus=scaffold415:87592:88905:+ [translate_table: standard]	29580.7	0.086	1|-|-	1|-|-	Cotton_D_gene_10001927;Cotton_D_gene_10001932;Cotton_D_gene_10001933;CotAD_40119;CotAD_40120;CotAD_67630/-/-	Cotton_D_gene_10001935	MMLEWPPVEFPVIEFRPSDLKRGTNGWRRLCKRVREACETFGCFEVVYEKISAKVREETFELMKELIEVPVERKQKNVSPLPYHGWVGPCNQVSLLYEGFRLGDASNYDSVKSFAQLMWPDGHPRFCTIICDDQDSGPEIEVNGQWIKLSLSPSSFCFVVGDPLKAWSNERLKAVNHRVMMSGDKDRFSIATFAIPVEGTIIKAPKELIDEQHPQLYKDFDFMDFFLFAFSNPAKHIDSGEQLQAFASLPPPISD	40.5	5e-64	gi|470118753|ref|XP_004295486.1|	PREDICTED: feruloyl CoA ortho-hydroxylase 1-like [Fragaria vesca subsp. vesca]	32.65	2e-11	sp|P93771|GAOX1_ORYSJ	Gibberellin 20 oxidase 1 OS=Oryza sativa subsp. japonica GN=20ox1 PE=2 SV=2	37.56	3e-46	B9RQA0	B9RQA0_RICCO Putative uncharacterized protein OS=Ricinus communis GN=RCOM_1486980 PE=4 SV=1	-	-	-	-	-	-	-	K04125|1|3e-13|71.6|zma:103631860|EC[not_get]			catalytic_activity
373	Cotton_D_gene_10002087	locus=scaffold386:131832:138684:- [translate_table: standard]	109717	0.082	6|-|3	7|-|7	CotAD_73760/-/CotAD_73760	Cotton_D_gene_10002087	MQYSNNGKLKRQTVGTSAESHAAELLSVKAIQCLKTLLIIHLSDVTVPSKIPPSATLLDCISISLCFPSSLPYIILIFLFNFHLCFDDLRRVFSLEKRGRIPEELLAFRYLNFLKIDQNFFTGPLPAFIGNMSRLGLLSVAQNSLSGPIPKEIGNLKELYLLSLGINNFSGTIPPVLGNLVELQQLYINSCGLTGEIPSTFANLQNLQIVGASDNAFTGKIPEFIGSNWTKLASLRLEGNSFEGPIPSNIGNLTSLTILRITGIYNGSSSLDFVRNLKNISDLVLRNVLLTGSIPSDISDFQSLQKLFLGNNSLSGTLPSQKSEILKSIDVSYNQLSGNLPPWIDSSLQLNVVANNFTLNSSDIRLLPGLQCLQRGFPCNRNSPRYANFAIKCGGPQMT…	67.92	0	gi|224072359|ref|XP_002303698.1|	predicted protein [Populus trichocarpa]	53.44	0	sp|C0LGH2|Y1561_ARATH	Probable LRR receptor-like serine/threonine-protein kinase At1g56130 OS=Arabidopsis thaliana GN=At1g56130 PE=1 SV=2	67.92	0	B9GY42	B9GY42_POPTR Predicted protein OS=Populus trichocarpa GN=POPTRDRAFT_1074249 PE=4 SV=1	DR2518_1	68.6	9e-12	COG0515	Serine/threonine protein kinase	RTKL	General function prediction only ; Signal transduction mechanisms ; Transcription ; Replication, recombination and repair ;	K04733|1|0.0|881|cic:CICLE_v10014641mg|EC[not_get]	cellular_process metabolic_process		binding catalytic_activity
374	Cotton_D_gene_10002817	locus=scaffold360:420258:421535:+ [translate_table: standard]	43891.7	0.169	3|3|3	21|24|22	CotAD_05524/CotAD_05524/CotAD_05524	Cotton_D_gene_10002817	MGAFHRLNLLHFTLSLVVIAVNGHNITAILEGFPDYSVYNSFLTQTKLADEINTRETITCLVLNNGAMSALTSKHPLSVVKNILSLHVLLDYYDPQKLHKISDGTTLTTTLYQTTGNAPGNLGFVNITDLQGGKVGFGSAIPGSKLDSSYTKSVKQIPYNISILEISAPIIAPGILTAPAPSSSGVNITGLLEKAGCKTFASLLTSSGVLKTYESALDKGLTVFAPSDEAFKAEGVPDLGKLTNAEQVSLLEYHASPDYKPKGTLKTTKDPISTLATNGAGKYDLTVTTAGDSVTLHTGVGPSRVAEAVFDSPPVAIFTVDNVLLPSELFGKSPSPAPAPEPVSSPSPTPSLSPSPSPMSEAPSPLAASPPAPPTGTPVGSPADSPAGSSENSTSDNAA…	99.29	0	gi|157273660|gb|ABV27484.1|	fasciclin-like arabinogalactan protein 13 [Gossypium hirsutum]	78.74	2e-175	sp|O22126|FLA8_ARATH	Fasciclin-like arabinogalactan protein 8 OS=Arabidopsis thaliana GN=FLA8 PE=1 SV=1	99.29	0	A9XTL8	A9XTL8_GOSHI Fasciclin-like arabinogalactan protein 13 OS=Gossypium hirsutum GN=FLA13 PE=2 SV=1	-	-	-	-	-	-	-	K03456|1|2e-63|223|mus:103981635|EC[not_get]!K19519|2|8e-38|145|atr:105420786|EC[not_get]		cell cell_part extracellular_region membrane membrane_part
375	CotAD_30191	locus=Dt_chr1:46057256:46058053:+ [translate_table: standard]	28350.2	0.14	2|3|3	11|13|18	Cotton_D_gene_10023007;CotAD_44936/Cotton_D_gene_10023007;CotAD_44936/Cotton_D_gene_10023007;CotAD_44936	CotAD_30191	MEFSRVSMISCFALLLCSSLAYGASSPPAPMAMSPSPTPSPAPAPAPEYVNLTYLLSVAGPFHTFLNYLESTKVLDTFQNQANNTDQGITIFVPKDSAFKALKKPSLSNLTNDQLKSLILFHAMPKFYSLADFNKLSTKGPVSTLAGSQYSLNFTDNSGTVHLDSGWSKTKVSSAVHSTDPVAIYQVDKVLLPEAIFGTDIPPMPPAPAPAPDISPAADAPSAETKGKGSSSKAEPSTSSSHRIMNFGTWNQLLLALFGGWVMFF	98.87	9e-131	gi|157273638|gb|ABV27473.1|	fasciclin-like arabinogalactan protein 2 [Gossypium hirsutum]	74.51	5e-77	sp|Q9SJ81|FLA7_ARATH	Fasciclin-like arabinogalactan protein 7 OS=Arabidopsis thaliana GN=FLA7 PE=1 SV=1	98.87	1e-129	A9XTK7	A9XTK7_GOSHI Fasciclin-like arabinogalactan protein 2 OS=Gossypium hirsutum GN=FLA2 PE=2 SV=1	all5264	47.4	7e-06	COG2335	Secreted and surface protein containing fasciclin-like repeats	M	Cell wall/membrane/envelope biogenesis ;	K03456|1|5e-17|84.0|mus:103981635|EC[not_get]!K19519|2|7e-14|74.3|atr:105420786|EC[not_get]	-	-	-
376	Cotton_D_gene_10040578	locus=scaffold29:9627255:9634274:- [translate_table: standard]	84435.6	0.072	-|4|-	-|4|-	-/CotAD_70101/-	Cotton_D_gene_10040578	MASRVILRRRSYIFNSPTRLTSLIRGFSSFEHRQSFTSEDSQGSPYVASHPYPGSDFKKVVLPSVLKNELSYFLASQYSSGISNSGYLVGNLEFKFPSGVRWFSQSARSASTSTASSDGKEQQASKKVKEASPEECDQAVEGLSTVKAKAKAKQVQDSTKSGQSLIKKLWAMILGIGPALRAVASMSREDWAKKLRHWKDEFKSTMQHYWLGTKLLWADIRISSRLLVKLASGKGLSRRERQQLTRTTADIFRLVPFAVFIIVPFMEFLLPVFLKLFPNMLPSTFQDKMKEQEALKRRLNARIEYAKFLQDTVKEMAKEIQNSRSGDVKKTAEDLAEFMNKVRTGAGVSNDEILGFAKLFNDELTLDNISRPRLVNMCKYMGISPYGTDAYLRYMLRKR…	79.38	0	gi|255547432|ref|XP_002514773.1|	leucine zipper-ef-hand containing transmembrane protein, putative [Ricinus communis]	51.7	3e-86	sp|Q5ZK33|LETM1_CHICK	LETM1 and EF-hand domain-containing protein 1, mitochondrial OS=Gallus gallus GN=LETM1 PE=2 SV=1	79.38	0	B9RM04	B9RM04_RICCO Leucine zipper-ef-hand containing transmembrane protein, putative OS=Ricinus communis GN=RCOM_1076740 PE=4 SV=1	-	-	-	-	-	-	-	K17800|1|0.0|1166|tcc:TCM_023432|EC[not_get]	-	-	-
377	CotAD_51532	locus=At_chr5:50100845:50104697:- [translate_table: standard]	47511.7	0.076	2|2|1	3|2|2	Cotton_D_gene_10001572;CotAD_47632/Cotton_D_gene_10001572/Cotton_D_gene_10001572;CotAD_47632	CotAD_51532	MKPDXGSASASTIKQVKLERESELRIEVGNETPLKLRLLNGSAEIFGSELAPEMWLTFPPRLKFAVFTWYGATIEMDGATETDYTADETPMVSYVNVHAVLEGRRNRAKALSPNDSEASQGPRVIVVGPTDSGKSTLSRMLLSWAAKQGWKPTFVDLDIGQGSITVPGCIAATPIELPIDPVEGIPLEMPLVYFYGHTTPSNNVDLYKTLVNELAQMLETQFARNAESRAAGMVINTMGWIEGTGYELLLHAIDTFKANVVLVLGQEKLFSMLKAVAKSKPNVDVVKLQKSGGVVSRNAKYRQKSRGYRIREYFYGLANDLSPHSNIANFSDLLVYRIGGGPQAPRSALPIGADPIANPLRVTPVNIDRDLLHMVLAVSYAKEPDQILSSNVAGFIYIT…	87.38	0	gi|356536520|ref|XP_003536785.1|	PREDICTED: protein CLP1 homolog [Glycine max]	45.09	2e-125	sp|Q54N48|CLP1_DICDI	Protein CLP1 homolog OS=Dictyostelium discoideum GN=clp1 PE=3 SV=1	87.38	0	I1LFF7	I1LFF7_SOYBN Uncharacterized protein OS=Glycine max GN=Gma.11683 PE=4 SV=1	APE1649	51.2	2e-06	COG1341	Predicted GTPase or GTP-binding protein	R	General function prediction only ;	K14399|1|0.0|833|tcc:TCM_018358|EC[not_get]	-	-	-
378	CotAD_52971	locus=Dt_chr11:13430209:13431894:+ [translate_table: standard]	35546.7	0.22	1|7|1	6|36|10	-/-/-	CotAD_52971	MSAPTLPMAAGVAAVSSSLYNNTKPSSLFSSSIHFLPSRLSSKQLKPSNLKTQSLNSLPLSLNLSLPRLPCFSAAFDSFQVTEDDQSSGEEYPETESQDLEEQPQQEEAEEDKVSESGGEEGKLYVGNLPYSMTSSELTEIFSEAGSVAKVEIVYDRVTDRSRGFGFVTMGSVDEAKEAIRLFDGSQVGGRTVKVNFPEVPKGGEREVMGPRIRRSYTSFIDSPYKIYAGNLGWRVTSEGLRDAFASQPGLLSAKVIYEKDTGRSRGFGFISFESAETVESALTAMNGVEVEGRPLRLNMAADRAPRTPLPAENSLERSELVSSVTV	65.12	1e-108	gi|356505441|ref|XP_003521499.1|	PREDICTED: 33 kDa ribonucleoprotein, chloroplastic-like [Glycine max]	73.68	4e-101	sp|P19684|ROC5_NICSY	33 kDa ribonucleoprotein, chloroplastic OS=Nicotiana sylvestris PE=1 SV=1	65.12	2e-107	I1JQ98	I1JQ98_SOYBN Uncharacterized protein OS=Glycine max GN=Gma.23073 PE=4 SV=1	all4377	52.8	8e-08	COG0724	RNA-binding proteins (RRM domain)	R	General function prediction only ;	K11294|1|1e-119|350|cic:CICLE_v10012204mg|EC[not_get]	-	-	-
379	CotAD_05220	locus=Dt_chr7:15126884:15143490:- [translate_table: standard]	117882	0.015	1|-|-	1|-|-	Cotton_D_gene_10034558/-/-	CotAD_05220	MEDPMERIGSEEESGLESTIKEDLSMEIDPPFKENVATAEDWRKALNKVVPAVVVLRTTACRAFDTESASAGSATGFVVDKRRGIILTNRHVVKPGPVVAEAMFLNREEITVHPLYRDPVHDFGFFHYNPNAIQFLDYEEIPLAPEAACVGLEIRVVGNDSGEKVSILAGTIARLDRDAPQYTKDGYNDFNTFYLQAASGTKGGSSGSPVIDWQGRAVALNAGGKTTTASAFFLPLERVVRALKFFQKGGESYTSKWEVVSIPRGTLQTTFLHKGFDEIRRLGLQSETEQMARHASAQGETGMLVVDSVVPGGPAHNHLEPGDVLVRVITQFLRLETLLDDSVEQNIELEIERGGTPLSVQLVVQDLHSITPAHFLEVSGAVIHPLSYQQARNFGFQCG…	65.76	0	gi|30678834|ref|NP_566204.2|	protease Do-like 7 [Arabidopsis thaliana]	65.76	0	sp|Q8RY22|DEGP7_ARATH	Protease Do-like 7 OS=Arabidopsis thaliana GN=DEGP7 PE=2 SV=1	65.67	0	D7L0G9	D7L0G9_ARALL Putative uncharacterized protein OS=Arabidopsis lyrata subsp. lyrata GN=ARALYDRAFT_477585 PE=4 SV=1	RSp1552	51.2	9e-06	COG0265	Trypsin-like serine proteases, typically periplasmic, contain C-terminal PDZ domain	O	Posttranslational modification, protein turnover, chaperones ;	K01259|1|9e-68|231|mdm:103428105|EC[not_get]	cellular_process metabolic_process single-organism_process	cell cell_part organelle	catalytic_activity
380	CotAD_57557	locus=At_chr3:40645954:40648211:- [translate_table: standard]	45874.5	0.313	-|1|1	-|2|1	-/-/-	CotAD_57557	MASLAQQFTGLRCPPLSSSRFSVKPKQTQKVGAFASPIVSAVAVSNAQTKDRLELKKMFEDAYERCRTAPMEGVAFTVEDFQNALEKYDFDSELGTKELLADYVDWVKGTVFCTDGNGALVDITAKSSAYLPVQEASIHKIKHVEEVGIVPGLREEFMIIGENEADDSLILSLRSIQYELAWERCRQLQAEDVVVKGKVVGANKGGVVALVEGLRGFVPFSQISSKATAEELSDKELPLKFVEVDEEQSRLVFSNRKAMADSQAQLGIGSVVLGTVQSLKPYGAFIDIGGINGLLHVSQISHDRVSDIATVLQPGDTLKVMILSHDRERGRVSLSTKKLEPTPGDMIRNPTLVFEKAEEMAQTFRQRIAQAEAMARADMLRFQPESGLTLSSDGILGPL…	86.43	0	gi|225432062|ref|XP_002280604.1|	PREDICTED: 30S ribosomal protein S1, chloroplastic [Vitis vinifera]	83.85	0	sp|P29344|RR1_SPIOL	30S ribosomal protein S1, chloroplastic OS=Spinacia oleracea GN=RPS1 PE=1 SV=1	86.43	0	D7SYG9	D7SYG9_VITVI Putative uncharacterized protein OS=Vitis vinifera GN=VIT_05s0077g00450 PE=4 SV=1	PM0801	104	1e-23	COG0539	Ribosomal protein S1	J	Translation, ribosomal structure and biogenesis ;	K02945|1|0.0|713|tcc:TCM_021436|EC[not_get]	metabolic_process	cell cell_part macromolecular_complex organelle	binding structural_molecule_activity
381	CotAD_17171	locus=At_chr6:52302622:52304053:+ [translate_table: standard]	21245.3	0.113	1|-|1	1|-|1	Cotton_D_gene_10020472;CotAD_20465/-/Cotton_D_gene_10020472;CotAD_20465	CotAD_17171	MLDSLIALKDLEGVEGLPPLSVIEDMRYEKNTRKSTRAEMERQKLEEMAKERVRQVDDKGRAYGTGRRKCSTARVWVEPGDGKFIINDKEFDVYFPMLDHRAALLRPFSETKTLGLWDIKCTVKGGGLSGQVGAIQLGISRALQNFEPELRPPLRAAGFLTRDSRVVERKKPGKAKARKSFQWVKR	88.71	2e-121	gi|255545214|ref|XP_002513668.1|	ribosomal protein S9, putative [Ricinus communis]	58.87	1e-50	sp|A9IVX6|RS9_BART1	30S ribosomal protein S9 OS=Bartonella tribocorum (strain CIP 105476 / IBS 506) GN=rpsI PE=3 SV=1	88.71	2e-120	B9RIU9	B9RIU9_RICCO Ribosomal protein S9, putative OS=Ricinus communis GN=RCOM_1582880 PE=3 SV=1	DR0175	120	5e-35	COG0103	Ribosomal protein S9	J	Translation, ribosomal structure and biogenesis ;	K02996|1|6e-123|354|tcc:TCM_024968|EC[not_get]	metabolic_process	cell cell_part macromolecular_complex	structural_molecule_activity
382	Cotton_D_gene_10010906	locus=scaffold121:234271:246660:+ [translate_table: standard]	81395.8	0.034	-|1|-	-|2|-	-/-/-	Cotton_D_gene_10010906	MDAFMGRSQTTKGIWIAKCAGLEPCTLVMDLEGTDGRERGEDDTAFEKQSALFALAVSDIVLINMWCHDIGREQAANKPLLKTVFQVMMRLFSPRKTTLMFVIRDKTRTPLEHLEPVLREDIQKIWDSVPKPEAHMETSLSEFFNVEVVALSSYEGKEELFKEQVANLRQRFFHSIAPGGIAGDRRGAVPASGFSFSAQHIWKVIKENKDLDLPAHKVMVATVRCEEIASEKYTSFTSNENWHSLEEAVKSGPVAGFGKKLNSILYTSLSEYDAEATYFDEGVRSAKRKHLEEKLLQLVQPAYQSMLGHLRIETLEKFKEAFDKALKGDEGFSVAACKCIKTYMASFDAGYADAAVELANWDSSKIRDKLRRDINDHVASVRAAKLSELTSSYEAKLNE…	79.97	0	gi|255572949|ref|XP_002527405.1|	Protein SEY1, putative [Ricinus communis]	73.62	0	sp|P93042|RHD3_ARATH	Protein ROOT HAIR DEFECTIVE 3 OS=Arabidopsis thaliana GN=RHD3 PE=1 SV=1	79.97	0	B9SN36	B9SN36_RICCO Protein SEY1, putative OS=Ricinus communis GN=RCOM_0312010 PE=4 SV=1	-	-	-	-	-	-	-	-		membrane membrane_part	binding catalytic_activity
383	CotAD_72047	locus=scaffold5169.1:3424:4663:+ [translate_table: standard]	43089.8	0.041	-|-|1	-|-|1	-/-/Cotton_D_gene_10011717	CotAD_72047	MGSSASSTSLSDTLLYFPPLSGRLATTEHDDEKVSFFIDCNNTGALFIHAKADGVTISDIIEPVYVPSIVHSFFPLNGVKNIEGVSNPLLGVQVTELVDGIFIGITANHSVLDGTSFWHFFNSWSAISRGLIHLPKLPVFQRRFFNSINFPIQISKSHVQNFPDDFVVPHFKERVFHFSKQSIVTLKARANAEVGTGTTNQMVQISSLQALLSHLWQSIIRNKNLEPNEDTHYCFIIGGRQRLHDLPQEYFGNVIKNQKVTMKVKQLLEQGVGSVALEMNKVIAANTGEDFNKFIETWIASPELLKISTISSRTLATSSSPRFDMYGNDFGWGKPIAVRSGSANKFDGKITLFCGAEEGSIDVEACLSPETLNALGNDEEFMDAIINN	57.26	3e-152	gi|55375996|gb|AAV50009.1|	anthranilate N-hydroxycinnamoyl/benzoyltransferase [Malus x domestica]	44.83	3e-98	sp|Q9SND9|Y3028_ARATH	Uncharacterized acetyltransferase At3g50280 OS=Arabidopsis thaliana GN=At3g50280 PE=1 SV=1	57.26	4e-151	Q5UFQ7	Q5UFQ7_MALDO Anthranilate N-hydroxycinnamoyl/benzoyltransferase (Fragment) OS=Malus domestica PE=2 SV=1	-	-	-	-	-	-	-	K13065|1|5e-30|122|crb:CARUB_v10011977mg|EC[not_get]!K15400|5|3e-29|120|pxb:103938506|EC[not_get]			catalytic_activity
384	CotAD_56818	locus=At_chr1:6837058:6838203:- [translate_table: standard]	43697.7	0.029	-|1|-	-|1|-	-/-/-	CotAD_56818	MEFALNKIDKHWDNYRSLNQHMNDLKRKVMELNGMKEDTDSRMSAELLPRKKLKREVQIWLENVERINGEVQSLDGKIGESSRFTRGFHAEDVLKRIREVEELIQQGKFQDGLVVDDPQWIGQVLSKTTLSGEGAKACEEEIWQCLMDDEVRQIGVWGMGGVGKTSIMKCINNRLVEGMGRFNIVIWTTVSKEMSIAKLQKDIASKIGVSFCGDEDEITRAGMLFEALSRKRKSVIILDDLWQKVPLDKVGIPESSTGSKLVLTTRSFDVCRKMSCRAIKVKPLVEEKSWKLFSEKVGRGILNIPEVELIAKKIVERCVGLPLGVITIASCMKDIDDLYEWRNALKELSDRKKSVNGLEEEVFLLSIGLQCNKLPAVADQL	69.77	6e-118	gi|188509950|gb|ACD56636.1|	disease resistance related protein [Gossypium raimondii]	31	1e-44	sp|Q8L3R3|RFL1_ARATH	Disease resistance protein RFL1 OS=Arabidopsis thaliana GN=RFL1 PE=2 SV=2	69.77	9e-117	B2ZAR5	B2ZAR5_GOSRA Disease resistance related protein OS=Gossypium raimondii PE=4 SV=1	-	-	-	-	-	-	-	K13459|1|4e-137|419|tcc:TCM_031405|EC[not_get]	-	-	-
385	CotAD_05411	locus=Dt_chr7:3886308:3888116:+ [translate_table: standard]	30526.6	0.246	4|4|3	15|11|7	Cotton_D_gene_10032799;CotAD_10079/Cotton_D_gene_10032799;CotAD_10079/Cotton_D_gene_10032799;CotAD_10079	CotAD_05411	MLRVATRRLTSCSSAWRSHQATSAIASRPFIDGSDSSDCLRSNFSSSSFSFSFASQFLLPTRGFASESLTPKSDHSVIPDVPATVAAIKNPSSKIVYDEYNHERFPPGDPSKRAFAYFVLTGGRFVYASVIRLLILKLVLSMSASKDVLALASLEVDLSSIEPGSTVTVKWRGKPVFIRRRTDEDIKLANSVDLGSLRDPQEDAARVKNPEWLIVVGVCTHLGCIPLPNAGDYGGWFCPCHGSHYDVSGRIRKGPAPYNLEVPTYTFLDESKLLIG	79.29	5e-153	gi|462411948|gb|EMJ16997.1|	hypothetical protein PRUPE_ppa009909mg [Prunus persica]	85.65	2e-141	sp|P49729|UCRI1_TOBAC	Cytochrome b-c1 complex subunit Rieske-1, mitochondrial (Fragment) OS=Nicotiana tabacum PE=2 SV=1	79.29	1e-149	B9RGW9	B9RGW9_RICCO Ubiquinol-cytochrome c reductase iron-sulfur subunit OS=Ricinus communis GN=RCOM_1445040 PE=3 SV=1	aq_045	61.2	8e-11	COG0723	Rieske Fe-S protein	C	Energy production and conversion ;	K00411|1|9e-163|455|tcc:TCM_017353|EC[not_get]	cellular_process localization metabolic_process	cell cell_part membrane membrane_part organelle	binding catalytic_activity transporter_activity
386	Cotton_D_gene_10021794	locus=scaffold162:312948:314306:+ [translate_table: standard]	12102.2	0.288	1|1|1	20|19|18	-/-/-	Cotton_D_gene_10021794	NEVKLFNCWSFQDLEIGDISLSDYIGVHASKHATYVPHTAGSGPREDATSIGSAGVVRRQAVDISPLRRVNQAIYLITTGAREPAFRNIKSIAGCLADELINAAKGSSNRW	60.4	2e-55	gi|449443478|ref|XP_004139504.1|	PREDICTED: 40S ribosomal protein S5-1-like isoform 3 [Cucumis sativus]	49.71	2e-45	sp|Q9ZUT9|RS51_ARATH	40S ribosomal protein S5-1 OS=Arabidopsis thaliana GN=RPS5A PE=1 SV=1	50.86	3e-45	B9T025	B9T025_RICCO 40S ribosomal protein S5, putative OS=Ricinus communis GN=RCOM_0037210 PE=3 SV=1	PAB0428	52.4	9e-09	COG0049	Ribosomal protein S7	J	Translation, ribosomal structure and biogenesis ;	K02989|1|6e-47|152|rcu:RCOM_0037210|EC[not_get]		cell cell_part macromolecular_complex membrane organelle organelle_part
387	CotAD_33468	locus=At_chr11:57137343:57141605:+ [translate_table: standard]	91978.1	0.542	5|4|6	26|24|29	-/-/-	CotAD_33468	MEETLLHGTLHATIYEVDRLHDGGGNFFGKLVANVQETIGIGKGVPKIYATIDLERARVGRTRTIENETSNPRWYESFHIYCAHNASNVVFTVKDDNPIGATLIGRAYVPVKDLTEGDEVDRWVVILDEDKNPIKSGGKIHVRLQYFDVTKDRNWACGIVSRKFPGVPYTFYPQRKGCKVSLYQDAHIPDGFVPKIPLAGGKNYEPHRCWEDIFDAITNAKHMIYITGWSVYTEIALVRDSRRPKPGGDITIGELLKKKASEGVRVNMLVWDDRTSVGLLKKDGLMATHDEETEQFFKDTDVNCVLCPRNPDDGGSFVQELQISTMFTHHQKIVVVDAAMPNGDPEKRRIVSFVGGIDLCDGRYDTPFHSLFRTLDTAHHDDFHQPNFTDASITKGGPR…	99.26	0	gi|195984443|gb|ACG63794.1|	phospholipase D alpha [Gossypium arboreum]	85.64	0	sp|Q41142|PLDA1_RICCO	Phospholipase D alpha 1 OS=Ricinus communis GN=PLD1 PE=1 SV=1	99.26	0	D4P4T8	D4P4T8_GOSHI Phospholipase D OS=Gossypium hirsutum GN=PLDalpha PE=2 SV=1	SMb20094	64.3	5e-10	COG1502	Phosphatidylserine/phosphatidylglycerophosphate/cardiolipin synthases and related enzymes	I	Lipid transport and metabolism ;	K01115|1|0.0|1524|tcc:TCM_027158|EC[not_get]	cellular_process metabolic_process single-organism_process	cell cell_part membrane organelle	binding catalytic_activity
388	Cotton_D_gene_10037082	locus=scaffold139:415796:423557:- [translate_table: standard]	97279	0.01	1|1|-	1|1|-	Cotton_D_gene_10037083;CotAD_00102;CotAD_00101/Cotton_D_gene_10037083;CotAD_00102;CotAD_00101/-	Cotton_D_gene_10037082	MTASEKELELQLMEAGNRLVEPPSSVAELIPLLDQVESCLSRVEQSPSQSMQNALSPSLKALVAEHLFRHPDDDVKVAVAACISEITRITAPDAPYDDDQMREVFQLIVSSFENLSDKSSRSFIKRTSILETVAKVRSCVVMLDLECDALIVEMFQHFLKAIRDYHAEAVFTSMVTIMTLVLEESEDIPTELLSPILSSVKKDNEEVLPVARKLAEKVLENCASKLQPYLTQAVENLGISFDDYSSIVASICGATAGAVERDDAAVGKLADDEKIPAEAPLENAAQGDKKIPKEAVSIEQVALVNEKTPVPVACNGIMQTADSISVKKQEDDHIADKSENETSTVAEPDLLEAEKVVDPDPKLEQSTQEKERKSDSKLTELSGSSQVDEKEVETIPDRK…	52.26	0	gi|462422426|gb|EMJ26689.1|	hypothetical protein PRUPE_ppa001087mg [Prunus persica]	27.67	1e-21	sp|Q5U241|PD5BB_XENLA	Sister chromatid cohesion protein PDS5 homolog B-B OS=Xenopus laevis GN=pds5b-b PE=2 SV=2	52.03	0	I1JU76	I1JU76_SOYBN Uncharacterized protein OS=Glycine max GN=Gma.40942 PE=4 SV=1	-	-	-	-	-	-	-	K11267|1|4e-66|228|vvi:100853350|EC[not_get]	-	-	-
389	CotAD_40845	locus=At_chr9:50770237:50773727:+ [translate_table: standard]	93210.1	0.247	1|-|1	1|-|1	-/-/-	CotAD_40845	MADRVITRVHSLRERLDETLLAHRNEILALLSRIEGKGKGILQHHQIILEFEAIPEENRKKLANGAFFEVLKASQEAIVLPPWVALAVRPRPGVWEYIRVNVHALVVEELTVAEYLHFKEELVDGSSNGNFVLELDFEPFNSSFPRPTLSKSIGNGVEFLNRHLSAKLFHDKESMHPLLEFLRVHCHKGKNMMLNDRIQNLNALQHVLRKAEEYLGTLPPETPCAEFEHRFQEIGLERGWGDTAERVLEMIQLLLDLLEAPDPCTLEKFLGRIPMVFNVVILTPHGYFAQDNVLGYPDTGGQVVYILDQVRALENEMLLRIKQQGLNITPRILIITRLLPDAVGTTCGQRLEKVYGTEHSDILRVPFRTEKGIVRKWISRFEVWPYLETYTEDVAHEIS…	99.88	0	gi|359357829|gb|AEV40462.1|	sucrose synthase 3 [Gossypium arboreum]	89.07	0	sp|P13708|SUSY_SOYBN	Sucrose synthase OS=Glycine max GN=SS PE=1 SV=2	99.88	0	G9BRX7	G9BRX7_GOSAR Sucrose synthase 3 OS=Gossypium arboreum PE=2 SV=1	SSO0987	53.5	1e-06	COG0297	Glycogen synthase	G	Carbohydrate transport and metabolism ;	K00695|1|0.0|1558|tcc:TCM_037464|EC[not_get]	cellular_process metabolic_process single-organism_process		catalytic_activity
390	CotAD_38296	locus=At_chr8:45429925:45432438:- [translate_table: standard]	25749	0.044	-|1|-	-|1|-	-/-/-	CotAD_38296	MATSSFLRNRYWILRHGKSIPNEKGLIVSSLENGIRLEYQLASEGVEQAELAGKLFLKELKENDIPLENVRMCYSPFARTRHTAEVVASPLNLPFEGPQCKVMEDLRERYFGPSFELLSHDKYTEIWAMDEKDPFIRPEGGESVDDVASRLASAMATMESEYQGCTILVVSHGDPLQILQTILNAASKQMEPSCNDLASRIQAVRIPSILSQHRNFALLTGELRAVR	78.32	2e-132	gi|147822391|emb|CAN59902.1|	hypothetical protein VITISV_002890 [Vitis vinifera]	-	-	-	-	78.32	3e-131	A5C079	A5C079_VITVI Putative uncharacterized protein OS=Vitis vinifera GN=VITISV_002890 PE=4 SV=1	SSO2236	50.8	3e-07	COG0406	Fructose-2,6-bisphosphatase	G	Carbohydrate transport and metabolism ;	K15634|1|6e-06|48.9|obr:102722606|EC[not_get]	-	-	-
391	CotAD_73817	locus=scaffold5488.1:949:2427:+ [translate_table: standard]	11296.8	0.408	3|3|3	16|16|16	-/-/-	CotAD_73817	MDHLSKFLACDWAGDNIRVNTIAPALIKTPLSQRFSKDKEGINAIISRTPLGRAGEPKEVSAMVAFLCLPAASYVTGQLIFVDGGITVNGLCFPNQITKHHEL	65.59	1e-37	gi|462401368|gb|EMJ06925.1|	hypothetical protein PRUPE_ppa010064mg [Prunus persica]	57.29	3e-33	sp|Q9ASX2|TRNH1_ARATH	Tropinone reductase homolog At1g07440 OS=Arabidopsis thaliana GN=At1g07440 PE=1 SV=1	59.38	2e-35	D7LC75	D7LC75_ARALL Putative uncharacterized protein OS=Arabidopsis lyrata subsp. lyrata GN=ARALYDRAFT_902059 PE=4 SV=1	SMa0059	64.3	4e-13	COG1028	Dehydrogenases with different specificities (related to short-chain alcohol dehydrogenases)	IQR	Lipid transport and metabolism ; Secondary metabolites biosynthesis, transport and catabolism ; General function prediction only ;	K08081|1|6e-44|147|tcc:TCM_041763|EC[not_get]	metabolic_process		catalytic_activity
392	CotAD_63808	locus=At_chr12:17866470:17867932:- [translate_table: standard]	48551.1	0.017	-|-|1	-|-|1	-/-/-	CotAD_63808	MALAPGKLPPGPPGWHIFGNIFDLGTMPHRTLTRLRDKYGQVIWLRLGSLNTMAILSTKAAAEFFKNHDLSFAERNITETMRAHDYHKSSVALTPYGSYWRVLRRLVTVDMLVNKRINETAYIRRKCIGNMLQWIEDEASKIQGESNRNGIHVARFVFLLTFNLLGNLMLSRDLLDPDSKEGSEFFVVMSRLMDLSGKGNIADFFPWLKWLDPQGLKRKTTKDLGKAIGIASKFVKQRREDKRLSDNNKRDFLDLLLEFEGNGKDEPAKFSDQENIFILELFMAGSETTSSTVEWAFTELLCNPESMIKVKAELSRVVGPNKRVEENDVQKLHYLNAVIKETFRLHPPLPFLVPRRALQDTEFMGYHIPQNTQVLVNAWAIGRDPEVWDDPLSFKPERF…	71.39	0	gi|224090875|ref|XP_002309107.1|	cytochrome P450 [Populus trichocarpa]	57.74	1e-171	sp|P37122|C76A2_SOLME	Cytochrome P450 76A2 OS=Solanum melongena GN=CYP76A2 PE=2 SV=1	71.39	0	B9HCH6	B9HCH6_POPTR Cytochrome P450 OS=Populus trichocarpa GN=CYP76A8 PE=3 SV=1	DR2473	64.3	1e-10	COG2124	Cytochrome P450	Q	Secondary metabolites biosynthesis, transport and catabolism ;	K00517|1|2e-113|345|ath:AT3G52970|EC[not_get]!K07408|2|8e-90|283|pop:POPTR_0007s06310g|EC[not_get]!K13083|3|2e-88|280|mus:103993499|EC[not_get]!K05280|4|2e-87|277|crb:CARUB_v10000754mg|EC[not_get]	metabolic_process		binding catalytic_activity
393	Cotton_D_gene_10015340	locus=scaffold155:1526052:1529495:- [translate_table: standard]	39321.9	0.102	-|1|-	-|2|-	-/-/-	Cotton_D_gene_10015340	MGIYLSTPKTEKFSEDGENDRVRYGLSSMQGWRATMEDAHAAYPDLDASTSFFGVYDGHGGKTWMVQVLKHEAYAAGDIGTSLQEAFFRMDEMMRGQRGWRELAILGDKINKFTGMIEGLIWSPRGGDSNDQVDNWAFEEGPHSDFPGPTSGSTACVAVIRNNQLIVANAGDSRCVISRKGQAYNLSRDHKPDLEVEKERILKAGGFIHAGRVNGSLNLARAIGDMEFKQNKFLSAEKQIVTANPDINTIELCDDDEFMVLACDGIWDCMSSQTLVDFIHDQLKSESKLSVVCERVLDKCLAPSTATGEGCDNMTMILVQFKKPIKSTSSAEEQSSNSESTETEPKLEGNAEK	88.59	0	gi|470111465|ref|XP_004291968.1|	PREDICTED: probable protein phosphatase 2C 60-like [Fragaria vesca subsp. vesca]	81.02	0	sp|Q9SZ53|P2C60_ARATH	Probable protein phosphatase 2C 60 OS=Arabidopsis thaliana GN=At4g31860 PE=2 SV=1	86.19	0	B9RNU7	B9RNU7_RICCO Protein phosphatase 2c, putative OS=Ricinus communis GN=RCOM_0920800 PE=3 SV=1	YJL005w_2	72	2e-13	COG0631	Serine/threonine protein phosphatase	T	Signal transduction mechanisms ;	K17499|1|0.0|630|tcc:TCM_036898|EC[not_get]	cellular_process metabolic_process	macromolecular_complex	binding catalytic_activity
394	CotAD_37565	locus=Dt_chr3:20305478:20307597:- [translate_table: standard]	35057.3	0.032	1|-|-	1|-|-	CotAD_09467;CotAD_67438;Cotton_D_gene_10000945;CotAD_18490;Cotton_D_gene_10032156/-/-	CotAD_37565	MGVGENQHMKWAMRLRVALFLAQALEYCSCRGRALYHDLNAYRILFDQDGNPRLSSFGLMKNSRDGKSYSTNLAFAPPEYLRTGRVIPESVVYSFGTLLLDLLSGKHIPPSHALDLIRGKNFLMLMDSCLEGQFSNDDGTEIVRLASRCLQYEPRERPNIKSLVTALTPLQKGTEVPSHVLMGISHETTSLKHTMSLTPLREACSRMDLTAIHEILEEIGYKDDEGTANEFIDSETMVSPTVLARRCLCYMMNDMPQEALGDAMQAQVISPEWPAAFYLQAAALFSLGMDNDAKETLKDGTNLEAKNHRN	77.03	0	gi|255558866|ref|XP_002520456.1|	receptor protein kinase, putative [Ricinus communis]	65.29	4e-153	sp|Q9FHD7|Y5126_ARATH	Probable serine/threonine-protein kinase At5g41260 OS=Arabidopsis thaliana GN=At5g41260 PE=1 SV=1	77.03	0	B9S387	B9S387_RICCO Receptor protein kinase, putative OS=Ricinus communis GN=RCOM_0731410 PE=4 SV=1	-	-	-	-	-	-	-	K14500|1|0.0|553|tcc:TCM_041709|EC[not_get]	cellular_process metabolic_process	membrane	binding catalytic_activity molecular_transducer_activity
395	CotAD_05889	locus=Dt_chr5:50727714:50732859:+ [translate_table: standard]	49224.8	0.05	1|-|2	1|-|4	Cotton_D_gene_10019969/-/Cotton_D_gene_10019969	CotAD_05889	MAEASKVIHVRNVGHEISENDLLQLFQPFGVITKLVMLRAKNQALLQMQDIPSAINAMQFYTNVQPTIRGRNVYVQFSSHQELTTMDQNAQGRGDEPNRILLVTIHHMLYPITVEVLHQVFSPHGFVEKIVTFQKSAGFQALIQYQGRQNAISARTSLQGRNIYDGCCQLDIQFSNLDELQVHYNNERSRDFTNPNLPTEQKGRSSQHPGYGDAGVGFPQMANAAAIAAAFGGGLPPGISGTNDRCTVLVSNLNPDRIDEDKLFNLFSLYGNIVRIKLLHNKPDHALVQMGDGFQAELAVHFLKGAMLFGKRLEVNFSKHPNITQGTDTHEYVNSNLNRFNRNAAKNYRYCCSPTKMVHLSTLPQDVTEEEIVNHLAQHGTIVNTKLFEMNGKKQALVM…	90.76	0	gi|359493143|ref|XP_002264763.2|	PREDICTED: polypyrimidine tract-binding protein homolog 3 isoform 2 [Vitis vinifera]	87.53	0	sp|Q6ICX4|PTBP3_ARATH	Polypyrimidine tract-binding protein homolog 3 OS=Arabidopsis thaliana GN=At1g43190 PE=2 SV=1	88.51	0	D7SRE5	D7SRE5_VITVI Putative uncharacterized protein OS=Vitis vinifera GN=VIT_18s0072g00310 PE=4 SV=1	-	-	-	-	-	-	-	K14948|1|0.0|860|tcc:TCM_035648|EC[not_get]	-	-	-
396	CotAD_00033	locus=Dt_chr9:64095124:64097024:+ [translate_table: standard]	39588.7	0.097	2|2|3	2|3|6	Cotton_D_gene_10000986;CotAD_43488/Cotton_D_gene_10000986;CotAD_43488/Cotton_D_gene_10000986;CotAD_43488	CotAD_00033	MDSAIAQKTWELENNILTVETPDPSSDSIFYYDEAAQAKFQQEKPWANDPHYFKRVKISALALLKMVVHARSGGTIEVMGLMQGKTDGDAIIVMDAFALPVEGTETRVNAQADAYEYMVDYSQTNKQAGRLENVVGWYHSHPGYGCWLSGIDFPTQLLTQQFQEPFLAVVIDPTRTVSAGKVEIGAFRTYPEGYKPPDDPISEYQTIPLNKIEDFGVHCKQYYALDITYFKSSLDCHLLDLLWNKYWVNTLSSSPLLGNGDYVAGQISDLAEKLEQAENQLAHSRIGPLGPPRKKLQEESQLAKITRDSAKITVEQVHGLMSQVIKDILFNSVRQSSRSQNDQSGPEPMIET	90.22	0	gi|255574089|ref|XP_002527960.1|	jun activation domain binding protein, putative [Ricinus communis]	83.81	0	sp|Q8LAZ7|CSN5B_ARATH	COP9 signalosome complex subunit 5b OS=Arabidopsis thaliana GN=CSN5B PE=1 SV=2	90.22	0	B9SPP1	B9SPP1_RICCO Jun activation domain binding protein, putative OS=Ricinus communis GN=RCOM_0204710 PE=4 SV=1	ECU11g0570	123	3e-32	COG1310	Predicted metal-dependent protease of the PAD1/JAB1 superfamily	R	General function prediction only ;	K09613|1|0.0|694|tcc:TCM_036813|EC[not_get]	-	-	-
397	CotAD_43386	locus=Dt_chr9:68892218:68892773:+ [translate_table: standard]	11974.3	0.226	2|1|1	9|1|2	Cotton_D_gene_10015997;CotAD_23384/Cotton_D_gene_10015997;CotAD_23384/Cotton_D_gene_10015997;CotAD_23384	CotAD_43386	MGVFTFVCRSKGGEWSAKQLEGEIESSAASTYELQRKLVQAATACDSSGGVTSSFSVVTPNSAAFQVVIGGAVGGAFIGXXXXXXXAAAAEAPAAEEKKEEKEESDDDMGFSLFD	74.19	5e-18	gi|297796629|ref|XP_002866199.1|	hypothetical protein ARALYDRAFT_918901 [Arabidopsis lyrata subsp. lyrata]	72.58	6e-18	sp|Q9LVC9|RLA32_ARATH	60S acidic ribosomal protein P3-2 OS=Arabidopsis thaliana GN=RPP3B PE=1 SV=1	74.19	6e-17	D7MMU1	D7MMU1_ARALL Putative uncharacterized protein OS=Arabidopsis lyrata subsp. lyrata GN=ARALYDRAFT_918901 PE=4 SV=1	-	-	-	-	-	-	-	K02942|1|5e-19|79.0|pda:103715526|EC[not_get]	cellular_process metabolic_process	cell cell_part macromolecular_complex organelle	structural_molecule_activity
398	Cotton_D_gene_10014349	locus=scaffold77:1250175:1255309:- [translate_table: standard]	39521.8	0.126	3|3|-	6|4|-	Cotton_D_gene_10012650;CotAD_35578/Cotton_D_gene_10012650;CotAD_35578/-	Cotton_D_gene_10014349	MAKSPEEEHPVKTFGWAATDPSGHLSPFTFSRRVTGEEDVRFKVLYCGICHSDLHSIKNEWGSSNYPMVPGHEIVGEVTEVGSKVEKVKVGDKVGVGCMVGACHSCDSCANDLENYCPKLILTYNGIYYDGTITYGGYSDSMVANERYVVRIPDGMPLDSAAPLLCAGITVYSPLKYFGLGEPGKHIGIVGLGGLGHVAVKFAKALGSKVTVISTSPNKKAEALEHLGADSFLVSRDQDELQAAMGTFDGIIDTVSATHPIMPLLGLLKSHGKLIMVGAPYEPLEVPAFSLIIGRKTMAGSGIGGMKETQEMIDFAAKHNIKADIEVISMDYVNKAMERLEQADVRYRFVIDIGNTLAATKPSS	84.81	0	gi|183585165|gb|ACC63874.1|	cinnamyl alcohol dehydrogenase [Populus trichocarpa]	76.42	2e-161	sp|Q9ZRF1|MTDH_FRAAN	Probable mannitol dehydrogenase OS=Fragaria ananassa GN=CAD PE=2 SV=1	84.81	0	B2Z6P7	B2Z6P7_POPTR Cinnamyl alcohol dehydrogenase OS=Populus trichocarpa PE=2 SV=1	MA0403	274	4e-89	COG1064	Zn-dependent alcohol dehydrogenases	R	General function prediction only ;	K00083|1|0.0|562|tcc:TCM_000946|EC[not_get]	metabolic_process		binding catalytic_activity
399	Cotton_D_gene_10028203	locus=scaffold127:3227460:3230365:+ [translate_table: standard]	45474.1	0.029	1|-|-	1|-|-	CotAD_23879/-/-	Cotton_D_gene_10028203	MSRTSLVAATSSQPLRFLHDGTNSPSSNPVAVQMINYALSHARSQKSDESYAQGMLILEQCLSTQSSESAGQFAQNSIGTVLLAMSNLLYERGSFEEAIEKLHRVQGLTRSSLGVRVAATEALVGLYLQLGQDDTSSVLADKCLDFLHKDDLRSNGGSKESLIARAKAVKGLVELVTGNLESAESFFHGVQDIEAWNGTAVLSYGEFLHATQQFSLAKELYQNIIEGVPKNEDFSDMNTLAICNMASDEVLLAATFALGQLESHMGNFRAAEEILTKALTKTEEYFGSSHPKVGVVLTCIALMYRNKARQERSSSLLIQEGLYRRAIEFLKAPPLESKGAETKLDRGDILALARGGYAEVLCVQQNRKTEGEKMKTWAEAVWSNRRMSLTDVLDISEPS…	69.9	0	gi|462402971|gb|EMJ08528.1|	hypothetical protein PRUPE_ppa006050mg [Prunus persica]	-	-	-	-	64.73	0	B9SZY5	B9SZY5_RICCO Putative uncharacterized protein OS=Ricinus communis GN=RCOM_0451740 PE=4 SV=1	-	-	-	-	-	-	-	-	-	-	-
400	CotAD_42886	locus=scaffold2162.1:263524:266823:- [translate_table: standard]	33841.4	0.138	4|-|-	4|-|-	CotAD_42887;CotAD_63632/-/-	CotAD_42886	MASVGLAFGEVFEVLSVESWQTSQWWRYCDRSVCARFYSWVLSLNSVESPRRAPHQGNIKTIKVSNISLEATERDIKEFFSFSGDIEYVEMQRGDEGSQIAYITFKDLQGAETAVLLSGATIVGLSVSISLSPDYKLPPAAFAPPPATGFILGKDTINKAKTFDEKHQLTSTASAKVASFDKKIGFTEKIQAGTTVITDKVKEMDQKFLVSEKTKSAFATAEQKVSGAGSAIMKNKYISAGATWVTDAFNKVAKAAGDVGQKTKEKVGAAEEERKRKVVDDFAQIHLSESPKDSASSKQPSKPAPAQGLIL	71.09	2e-117	gi|118485672|gb|ABK94686.1|	unknown [Populus trichocarpa]	-	-	-	-	71.09	3e-116	A9PE83	A9PE83_POPTR Putative uncharacterized protein OS=Populus trichocarpa PE=2 SV=1	-	-	-	-	-	-	-	-	metabolic_process		binding catalytic_activity
401	CotAD_43735	locus=Dt_chr2:29374413:29374903:+ [translate_table: standard]	14963.8	0.215	1|-|-	1|-|-	-/-/-	CotAD_43735	MEGIGNGIPTGDKLILRGLKFHGFHGVKAEEKKLGQKFLVDVDAWMDLRKAGKSDNLSDTLSYTDIYRIVKEVVEGPSHDLLESVAQMIASKTFTNHSQISAVRVKVGKPHVAVHGCLDYLGVEIMRYRTIDAPN	81.6	5e-73	gi|462400283|gb|EMJ05951.1|	hypothetical protein PRUPE_ppa013065mg [Prunus persica]	60.32	2e-51	sp|Q9SF23|FOLB1_ARATH	Dihydroneopterin aldolase OS=Arabidopsis thaliana GN=FOLB1 PE=1 SV=1	80.16	3e-70	F6HZT1	F6HZT1_VITVI Putative uncharacterized protein OS=Vitis vinifera GN=VIT_07s0005g04700 PE=4 SV=1	ZygiG	58.2	2e-11	COG1539	Dihydroneopterin aldolase	H	Coenzyme transport and metabolism ;	K01633|1|3e-77|228|tcc:TCM_023087|EC[not_get]	cellular_process metabolic_process		catalytic_activity
402	Cotton_D_gene_10035873	locus=scaffold5:3786150:3787908:+ [translate_table: standard]	62196.6	0.027	1|-|-	1|-|-	CotAD_38326;CotAD_11961;Cotton_D_gene_10027181;CotAD_16307/-/-	Cotton_D_gene_10035873	MASMLLYLLTISFFFLSPSLADASPSDPVSPGTICDSTPYPSYCKSMLPNRTTNVYGYGRFSIRKALSQSRKFLDLVNEYLHKYRSSLSISAIRALEDCCYLASLNMDFLSSSFKTVNGTSETLPPVEAEDVQTLLSSILTNQQTCLDGKQSTASARGIRENITVPMSNDTKLYSVSLALFTKGWVPKEKKSASRHPSSKQIGFKHRRLLMKLSSQTLSTIYESLGQRKLLQTSGSDNEVLISNIVTVSQDGSGNFTTINDAISAAPNNTNGVNGYFLIYIPAGVYQEYVSIPKNKKYLMMIGDGINQTIITGNRSVVDGWTTFNSATFAVVASNFVAVNITFQNTAGAIKHQAVALRSGADLSAFYSCSFEGYQDTLYTHSMRQFYRECDIYGTVDFI…	75.76	0	gi|224128446|ref|XP_002320332.1|	predicted protein [Populus trichocarpa]	61.78	0	sp|Q8RXK7|PME41_ARATH	Probable pectinesterase/pectinesterase inhibitor 41 OS=Arabidopsis thaliana GN=PME41 PE=2 SV=2	75.76	0	B9I9P7	B9I9P7_POPTR Pectinesterase OS=Populus trichocarpa GN=POPTRDRAFT_572672 PE=3 SV=1	RSp0138	64.3	2e-10	COG4677	Pectin methylesterase	G	Carbohydrate transport and metabolism ;	K01051|1|0.0|887|tcc:TCM_004695|EC[not_get]	cellular_component_organization_or_biogenesis cellular_process	cell cell_part	enzyme_regulator_activity
403	CotAD_36349	locus=At_chr6:45924176:45928515:- [translate_table: standard]	33623.9	0.163	2|1|3	2|1|4	Cotton_D_gene_10015771;CotAD_38057/Cotton_D_gene_10015771;CotAD_38057/Cotton_D_gene_10015771;CotAD_38057	CotAD_36349	MEKGNRQVVVSALQFACTDDVPTNLATAERLVRAAHAKGANIILIQELFEGYYFCQAQRDDFFQRAKPYNDHPTIKRMQELAKELGVVLPVSFFEEANNAHYNSVAIIDADGTDLGLYRKSHIPDGPGYQEKFYFNPGDTGFKVFQTKFAKIGVAICWDQWYPEAARAMALQGAEILFYPTAIGSEPQDEGLDSREHWQRVMQGHAGANVVPLVASNRIGKEIIETEHGKSQITFYGNSFIAGPTGEIVAAANDKDEAVLIAQFDLDKIKSKRSCWGVFRDRRPDLYKVLLTSDGSKTSS	87.58	0	gi|462401281|gb|EMJ06838.1|	hypothetical protein PRUPE_ppa009250mg [Prunus persica]	88.18	0	sp|Q3HVN1|AGUB_SOLTU	N-carbamoylputrescine amidase OS=Solanum tuberosum GN=CPA PE=2 SV=1	88.47	0	C6TN61	C6TN61_SOYBN Uncharacterized protein OS=Glycine max GN=Gma.4053 PE=2 SV=1	SPAC26A3.11	95.1	6e-22	COG0388	Predicted amidohydrolase	R	General function prediction only ;	K12251|1|0.0|578|cic:CICLE_v10028933mg|EC[not_get]	-	-	-
404	CotAD_18694	locus=scaffold336.1:28081:34226:+ [translate_table: standard]	65173.5	0.271	-|1|-	-|1|-	-/-/-	CotAD_18694	MPNTMLSFKHLLRPVLGGEERKSWCLLLLRKMMNGCNLVDNDSAVAGGVEDMYGEDIATMGQPVTPWTVSVASGYTLMRDPRHNKGVAFTERERDAHYLRGLLPPIVLSQELQEKRIMHMLRQYKVPLQRYMAMMDLQERNVRLFYKLLIDNVEELLPVVYTPTVGEACQKYGSIFRRPQGLYISLKEKGKILEVLKNWPERSVQVIVVTDGERILGLGDLGCQGMGIPVGKLSLYTALGGVRPSACLPITIDVGTNNEKLLNDEFYIGLRQRRATGQEYAELLHEFMSAVKQNYGEKVLIQFEDFANHNAFELLARYSSSHLVFNDDIQGTASVVLAGLLAALKLLGGTLADHRFLFLGAGEAGTGIAELIALEMSKQTGNPIEENRKKIWLVDSKGL…	81.68	0	gi|255550956|ref|XP_002516526.1|	malic enzyme, putative [Ricinus communis]	78.71	0	sp|P51615|MAOX_VITVI	NADP-dependent malic enzyme OS=Vitis vinifera PE=2 SV=1	81.68	0	B9RS07	B9RS07_RICCO Malic enzyme OS=Ricinus communis GN=RCOM_0801560 PE=3 SV=1	MA1002	101	8e-25	COG0281	Malic enzyme	C	Energy production and conversion ;	K00029|1|0.0|1050|tcc:TCM_037219|EC[not_get]	cellular_process metabolic_process single-organism_process	cell cell_part	binding catalytic_activity
405	CotAD_42649	locus=Dt_chr1:25727699:25729165:- [translate_table: standard]	53045.6	0.119	1|1|1	1|1|1	-/-/-	CotAD_42649	MGQKSRNNRLFHSSIILLLVSLSAALSSPFQLQTLLPRPLPSAPTLSWQDSEPESNSLQETSQLDPLSSNTTLEVQLELHHVDALSSEDTPELLFDLRLQRDALRSGTIYSLVSKAVARNPPRAAGRRSGFSSSIISGLAQGSGEYFTRLGVGTPTRNLYMVLDTGSDVVWVQCSPCKSCYSQSDPIFDPTKSTSFSGIPCGSSLCRSLDSSGCNQRRMCLYQVSYGDGSVTFGDFSTETLTFRRTTVGRVALGCGHDNEGLFVGAAGLLGLGRGRLSFPSQTGSRFNRKFSYCLVDRSASSKPSSLVFGDAAIPRGALFTPLLTNPKLDTFYYVELLGISVGGTRVPQISPSLFKMDQDGNGGVIIDSGTSVTRLTQPAYTAMRDAFRLGATNLKRAP…	73.26	0	gi|224067990|ref|XP_002302634.1|	predicted protein [Populus trichocarpa]	47.88	4e-119	sp|Q9LS40|ASPG1_ARATH	Protein ASPARTIC PROTEASE IN GUARD CELL 1 OS=Arabidopsis thaliana GN=ASPG1 PE=1 SV=1	73.26	0	B9GR19	B9GR19_POPTR Predicted protein OS=Populus trichocarpa GN=POPTRDRAFT_1072380 PE=3 SV=1	-	-	-	-	-	-	-	K01381|1|2e-39|148|smo:SELMODRAFT_13348|EC[not_get]!K00924|3|9e-34|136|ath:AT5G22850|EC[not_get]			catalytic_activity
406	CotAD_70022	locus=Dt_chr13:31239576:31240597:+ [translate_table: standard]	30439.2	0.052	1|1|-	1|3|-	CotAD_70023;Cotton_D_gene_10004461;CotAD_71559/CotAD_70023;Cotton_D_gene_10004461;CotAD_71559/-	CotAD_70022	MASEQYGAVFEESQDDDEEPSSSGNDDVLNGHDEEDEELLEEEEEEDFNSPSLLPQPIAAVVPSASIPAVPLAVPSSTVVTVASVPLGGSIPDSKRQRIDSAISEKKPPPPQQFDESRRKKNLTPKSAANKRRSKSKGGKLEEKRVLNDGFVISNNNFNNRSDHDQGNVEGLGGGGGGAGGERGNLTAVVEEAVKSCLTPVFKELLGSLIGGGGGGGRGISGMAMNAMPLSFGGTLNFGGGVGGNVEFMDERWRKQQILELEVYSKRLELVQDQIKVALEELRSIGG	61.62	9e-21	gi|255542374|ref|XP_002512250.1|	transcription regulator, putative [Ricinus communis]	-	-	-	-	61.62	1e-19	B9RET1	B9RET1_RICCO Transcription regulator, putative OS=Ricinus communis GN=RCOM_1428550 PE=4 SV=1	-	-	-	-	-	-	-	-	-	-	-
407	CotAD_29524	locus=Dt_chr3:21070153:21070929:+ [translate_table: standard]	14819.9	0.508	3|3|3	15|23|15	CotAD_38817;Cotton_D_gene_10004973;CotAD_59425;Cotton_D_gene_10022887;Cotton_D_gene_10022886;CotAD_01746;CotAD_49916;CotAD_64906;CotAD_26768;Cotton_D_gene_10025285;Cotton_D_gene_10029775;CotAD_04625/CotAD_38817;Cotton_D_gene_10004973;CotAD_59425;Cotton_D_gene_10022887;Cotton_D_gene_10022886;CotAD_01746;CotAD_49916;CotAD_64906;CotAD_26768;Cotton_D_gene_10025285;Cotton_D_gene_10029775;CotAD_04625/C…	CotAD_29524	MVRVSVLNDALKSMYNAEKRGKRQVMIRPSSKVIIKFLLVMQKHGYIGEFEYVDDHRSGKIVVELNGRLNKCGVISPRFDVGVKEIEGWTARLLPSRQFGYIVLTTSAGIMDHEEARRKNVGGKVLGFFY	99.23	5e-92	gi|388490984|gb|AFK33558.1|	unknown [Medicago truncatula]	98.46	4e-92	sp|P42798|R15A1_ARATH	40S ribosomal protein S15a-1 OS=Arabidopsis thaliana GN=RPS15AA PE=2 SV=2	99.23	8e-91	C6F117	C6F117_SOYBN Putative ribosomal protein S15 OS=Glycine max GN=Gma.54774 PE=2 SV=1	BH0148	54.3	9e-10	COG0096	Ribosomal protein S8	J	Translation, ribosomal structure and biogenesis ;	K02957|1|7e-93|268|jcu:105641573|EC[not_get]	metabolic_process	cell cell_part macromolecular_complex membrane organelle organelle_part	structural_molecule_activity
408	Cotton_D_gene_10033401	locus=scaffold104:3713146:3714337:+ [translate_table: standard]	17099.7	0.106	2|2|2	13|8|5	CotAD_28255;CotAD_53259/CotAD_28255;CotAD_53259/CotAD_28255;CotAD_53259	Cotton_D_gene_10033401	MAADPSELRYYEDDDTPTMKTIKGATTGFVAGTIWGTVVATWYDVPRVERSVAIPGLVRTLKMMGNYGMTFAAIGGVYIGVEQLLQNYRMKRDFVNGAVGGFVAGASILGFKGRSISTAISAGSALAFTSAVIDAGGQTTRLDTGKEYYPYTTKKRPVES	83.01	3e-83	gi|255583146|ref|XP_002532339.1|	protein translocase, putative [Ricinus communis]	73.2	9e-72	sp|O48528|OP163_ARATH	Outer envelope pore protein 16-3, chloroplastic/mitochondrial OS=Arabidopsis thaliana GN=OEP163 PE=1 SV=1	83.01	3e-82	B9T270	B9T270_RICCO Protein translocase, putative OS=Ricinus communis GN=RCOM_0413450 PE=4 SV=1	-	-	-	-	-	-	-	K17790|1|3e-85|249|jcu:105646495|EC[not_get]	localization	cell cell_part membrane membrane_part organelle organelle_part	transporter_activity
409	CotAD_55595	locus=Dt_chr9:63453727:63455518:- [translate_table: standard]	44401.1	0.142	1|-|-	2|-|-	CotAD_12463;Cotton_D_gene_10019050/-/-	CotAD_55595	MDYVYGPGKNHLFVPGPVNIPEPVLRAMNRNNEDYRSPAIPAMTKNLLEDVKKIFKTSTGTPFLIPTTGTGAWESALTNTLSPGDRTVSFLIGQFSLLWIDQQQRLNFNVDVVESEWGQGANLDILAEKLAADHSHTIKAICIVHNETATGVTNNLATVRKLLDHYRHPALLLVDGVSSICALDFRMDEWGVDVALTGSQKALSLPTGLGIVCASPKALEASKSAKSVRVFFDWNDYLKFYKLGTFWPYTPSIQLLYGLRAALDLIFEEGLGNVIARHTRMGKATRLAVEAWGLKNCTQKEEWYSDTVTAVLVPPYIDSAEIVKRAWKRYNMSLGLGLNKVAGKVFRIGHLGNLNELQLLGCLAGVEMILKDVGYPVKLGSGVAAACAYLQNNIPMIPS…	91.52	0	gi|255580601|ref|XP_002531124.1|	serine-pyruvate aminotransferase, putative [Ricinus communis]	87.03	0	sp|Q56YA5|SGAT_ARATH	Serine--glyoxylate aminotransferase OS=Arabidopsis thaliana GN=AGT1 PE=1 SV=2	91.52	0	B9SYQ5	B9SYQ5_RICCO Serine-pyruvate aminotransferase, putative OS=Ricinus communis GN=RCOM_0063050 PE=3 SV=1	PAE3447	139	5e-37	COG0075	Serine-pyruvate aminotransferase/archaeal aspartate aminotransferase	E	Amino acid transport and metabolism ;	K00830|1|0.0|796|tcc:TCM_040844|EC[not_get]			binding catalytic_activity
410	CotAD_00435	locus=Dt_chr9:67011183:67011517:+ [translate_table: standard]	8559.4	0.284	1|1|1	6|9|9	Cotton_D_gene_10037393;CotAD_52765/Cotton_D_gene_10037393;CotAD_52765/Cotton_D_gene_10037393;CotAD_52765	CotAD_00435	MKDFDEPGHLAPTGLHLGGAKFMVIQGEPGAVIRGKKGSGGVTIKKTAQALVFGIYEEPVTPGQCNMVVERLGDYLAEQGL	100	1e-53	gi|30841324|gb|AAO92742.1|	profilin [Gossypium hirsutum]	90.12	9e-49	sp|P25816|PROF_BETPN	Profilin OS=Betula pendula GN=BETVII PE=1 SV=1	100	2e-52	Q7Y253	Q7Y253_GOSHI Profilin OS=Gossypium hirsutum PE=2 SV=1	-	-	-	-	-	-	-	K05759|1|7e-51|158|csv:101219322|EC[not_get]	cellular_component_organization_or_biogenesis cellular_process	cell cell_part organelle	binding
411	CotAD_59557	locus=At_chr9:35640584:35642471:+ [translate_table: standard]	30640.1	0.03	-|1|-	-|1|-	-/CotAD_38521/-	CotAD_59557	MDEDHNNGGFLDMGKADRSVWLMKCPVVVAKSWKSQLASSSSSSDSQPLAKVVFSLDPLKPDDPSLHQFTMEVAGSETERIPKSYSLNMFKDFVPMCVFSESSQVQSYGSVAMEGKVEHKFDMKPHEENIEEYGRLCRERTNKSMIKNRQIQVIDNDRGVHMRPMPGMVGLISSNPKDKKKTMPVKQSDVKRTRRDRGELEDIMFKLFERQPNWTLKQLVQETDQPAQFLKEILNELCVYNKRGANQGTYELKPEYKKSAEDTAAE	82.22	3e-149	gi|317106673|dbj|BAJ53176.1|	JHL18I08.10 [Jatropha curcas]	29.75	7e-24	sp|O94424|T2FB_SCHPO	Transcription initiation factor IIF subunit beta OS=Schizosaccharomyces pombe (strain 972 / ATCC 24843) GN=tfg2 PE=1 SV=1	82.22	4e-148	E6NU66	E6NU66_9ROSI JHL18I08.10 protein OS=Jatropha curcas GN=JHL18I08.10 PE=4 SV=1	YGR005c	63.5	6e-11	COG5090	Transcription initiation factor IIF, small subunit (RAP30)	K	Transcription ;	K03139|1|1e-163|456|tcc:TCM_034139|EC[not_get]	cellular_process metabolic_process	cell cell_part macromolecular_complex	binding
412	CotAD_01151	locus=Dt_chr10:9280791:9282002:- [translate_table: standard]	16395.5	0.554	6|7|6	61|57|48	CotAD_38938;Cotton_D_gene_10029196/Cotton_D_gene_10029196/CotAD_38938;Cotton_D_gene_10029196	CotAD_01151	MEQTFIMIKPDGVQRGLVGEIIGRFEKKGFYLKGLKLITVDQSFAEKHYADLSAKPFFNGLVEYIISGPVVAMIWEGKNVVTTGRKIIGATNPAESAPGTIRGDFAIDIGRNVIHGSDSVESARKEIALWFPESPVNWQSSVHPWIYE	93.24	6e-100	gi|284433792|gb|ADB85102.1|	nucleoside diphosphate kinase B [Jatropha curcas]	91.89	7e-99	sp|P47920|NDKB_FLABI	Nucleoside diphosphate kinase B OS=Flaveria bidentis PE=2 SV=1	93.24	8e-99	D6BR65	D6BR65_9ROSI Nucleoside diphosphate kinase OS=Jatropha curcas GN=NDKB PE=2 SV=1	Cgl2319	149	7e-47	COG0105	Nucleoside diphosphate kinase	F	Nucleotide transport and metabolism ;	K00940|1|5e-102|291|tcc:TCM_005727|EC[not_get]	cellular_process metabolic_process single-organism_process	cell cell_part	binding catalytic_activity
413	Cotton_D_gene_10040832	locus=scaffold13:7357552:7358653:- [translate_table: standard]	32856.8	0.031	-|1|-	-|1|-	-/CotAD_16802;CotAD_68934;Cotton_D_gene_10019334;CotAD_74302/-	Cotton_D_gene_10040832	MNSAEQLVPDPSPEDTLVNPCTLQLTVFKCGGFTLGVAIHNALCDGLGATQFFCTAADIARGVDKVKYQPVWDRSTLLGPRNPPKVEAPVPEFLSLEKGFNPYKQDIGHVERECFYVEDECLDQLKALLFEQSGLGLTTFEILGAYIWRAKVKASKIPSEETVKFSYLMNIRKVVKPALPVGYWGNGCVAMYAKVSAKDLIEQPLWKTAELIKKSKSNASDEYVRSFIDLQELHYEDGITAGKGPCFFLPYASSNTGKNKGFKVLVSLRESAIADFREEMEKFSRKELSKL	58.77	6e-132	gi|462407490|gb|EMJ12824.1|	hypothetical protein PRUPE_ppa005640mg [Prunus persica]	33.64	6e-34	sp|Q8LL69|DBNBT_TAXCA	3'-N-debenzoyl-2'-deoxytaxol N-benzoyltransferase OS=Taxus canadensis GN=TAX10 PE=1 SV=1	58.02	1e-130	B9H2L2	B9H2L2_POPTR Predicted protein OS=Populus trichocarpa GN=POPTRDRAFT_555712 PE=4 SV=1	-	-	-	-	-	-	-	K15400|1|4e-42|153|cam:101506221|EC[not_get]			catalytic_activity
414	CotAD_52364	locus=Dt_chr5:19929327:19930277:- [translate_table: standard]	35336.6	0.025	1|-|-	1|-|-	CotAD_73255;CotAD_42844;Cotton_D_gene_10024429;Cotton_D_gene_10013213;Cotton_D_gene_10002512;Cotton_D_gene_10009810;CotAD_25043;CotAD_69205;Cotton_D_gene_10000428;CotAD_01008;CotAD_34429;CotAD_21007;Cotton_D_gene_10024708;Cotton_D_gene_10015383;CotAD_19834;CotAD_11297;CotAD_10809;CotAD_69180;CotAD_59991;CotAD_42490;CotAD_17624;CotAD_72431;CotAD_42854;CotAD_03201;Cotton_D_gene_10005630;Cotton_D_ge…	CotAD_52364	MVATNNFDAENAVISTRTGVSYMAVLPDGSALTIKRLSTCKLSEKQFRSEMNRLGQLRHPNLVPLLGYCVVEEERLLVYKHMPNGTLYSQLHGGNLIGFGNGKFEVLDWSTRLKIGVGVARGLAWLHHGCQPPYVHQYFSSNVVLLDDDFDARIADFGLARLMGSRDSNDSSFMNGDLGEFGYVAPEYSSTMVASLKGDVFSFGVVLLELVTGQKPIGVSNAEEGFKGNLVDWVNQLFSTGRSKDAVDKALLGKGCDDEIMQFLRVACTCVVPRPKDRPSMYQVYESLKIMGEKHGALEQYDEFPLIFGKQQEHDN	80.39	0	gi|224077382|ref|XP_002305238.1|	predicted protein [Populus trichocarpa]	72.76	5e-168	sp|O04567|Y1719_ARATH	Probable inactive receptor kinase At1g27190 OS=Arabidopsis thaliana GN=At1g27190 PE=1 SV=1	80.39	0	B9H3F4	B9H3F4_POPTR Predicted protein OS=Populus trichocarpa GN=POPTRDRAFT_556027 PE=4 SV=1	ECU01g0630	52.8	3e-07	COG0515	Serine/threonine protein kinase	RTKL	General function prediction only ; Signal transduction mechanisms ; Transcription ; Replication, recombination and repair ;	K04730|1|3e-85|259|gmx:100816197|EC[not_get]!K04733|5|2e-70|223|pop:POPTR_1276s002002|EC[not_get]	cellular_process metabolic_process	membrane membrane_part	binding catalytic_activity
415	CotAD_04959	locus=scaffold56.1:1497624:1498421:- [translate_table: standard]	30450.6	0.049	-|-|1	-|-|1	-/-/-	CotAD_04959	MSSTEEGGGAVRASGRAVSTDQTITTTTTTTNNNNNNPLETIIPILDTDFTRSNKELRNLRSLDEAFEADQLDPKAKPLIQRVPSTLDRHEDFRKYFKPKVISIGPLYHDDPTLHDSEKLKLKLAAHFVKNIGVDKDILYNNMKTEIGGLKKCYDPKELEKYSNDNEKLAWMFFVDGCAILQAVYIRYGQNYDRKSNELFIKNDLLTFVYSDLFLLENQLPFRVLELLTSTGDGKKFMDSIKRFIDDTVVNPAEIKEPQSHQRDR	42.11	2e-33	gi|462398788|gb|EMJ04456.1|	hypothetical protein PRUPE_ppa019553mg [Prunus persica]	33.58	1e-08	sp|Q9SD53|Y3720_ARATH	UPF0481 protein At3g47200 OS=Arabidopsis thaliana GN=At3g47200 PE=1 SV=1	38.83	9e-29	A5BPV4	A5BPV4_VITVI Putative uncharacterized protein OS=Vitis vinifera GN=VITISV_008111 PE=4 SV=1	-	-	-	-	-	-	-	-	-	-	-
416	CotAD_39778	locus=Dt_chr13:14693199:14701393:- [translate_table: standard]	47436.1	0.218	3|3|3	4|5|3	Cotton_D_gene_10018970/Cotton_D_gene_10018970/Cotton_D_gene_10018970	CotAD_39778	MAFPTKIKVMNPIVEMDGDEMTRIIWKSIKEKLIFPFLELDIKYFDLGLHNRDATNDEVTITSAEATLKYNVAIKCATITPDEGRVKEFNLKKMWKSPNGTIRNILNGTVFREPIICKNVPRLVPSWTKPICIGRHAFGDQYRATDLVVQESGKLMLVFVPDTSNEKKELEVFNFKGAGGVALSMYNTDESIRAFAEASMTTAYQKKWPLYLSTKNTILKSYDGRFKDIFHEVYETQWKSKFEAEGIWYEHRLIDDMVAYALKSEGGYVWACKNYDGDVQSDFLAQGFGSLGLMTSVLMCPDGKTIEAEAAHGTVTRHYRVHKTGGETSTNSIASIFAWSRGLAHRARLDGNDRLLDFTQKLEAACVGTVESGKMTKDLALLIHGPKVSRSQYLNTEEF…	87.53	0	gi|224109128|ref|XP_002315093.1|	predicted protein [Populus trichocarpa]	84.73	0	sp|P50218|IDHC_TOBAC	Isocitrate dehydrogenase [NADP] OS=Nicotiana tabacum PE=2 SV=1	87.53	0	B9HYD8	B9HYD8_POPTR Isocitrate dehydrogenase [NADP] OS=Populus trichocarpa GN=POPTRDRAFT_770098 PE=3 SV=1	YPO1641	52	1e-06	COG0538	Isocitrate dehydrogenases	C	Energy production and conversion ;	K00031|1|0.0|793|tcc:TCM_033701|EC[not_get]	cellular_process metabolic_process single-organism_process		binding catalytic_activity
417	CotAD_64828	locus=At_chr5:99739:100062:- [translate_table: standard]	11941.9	0.103	1|1|1	58|52|26	-/-/-	CotAD_64828	MAQKMLMMAVLVILGTKIATVTAADPTCLQRLMSCTPYLNNATLQLQGDCCDPLRQAVATELTCLCSLINNSTLLRSFNIPIAAALRITRGCGVTDQMNGCIPGQCF	41.98	9e-18	gi|357123498|ref|XP_003563447.1|	PREDICTED: lipid transfer-like protein VAS-like [Brachypodium distachyon]	-	-	-	-	41.98	1e-16	I1GWC5	I1GWC5_BRADI Uncharacterized protein OS=Brachypodium distachyon GN=BRADI1G33200 PE=4 SV=1	-	-	-	-	-	-	-	K14998|1|1e-10|59.7|mdm:103431243|EC[not_get]	-	-	-
[truncated: 7,885 more rows]
