# Supplementary material for: Integrative Proteomic and Metabolomic Analysis Reveals the Cotton Plant Defense Mechanisms Induced by Insect (<em>Adelphocoris suturalis</em> Jakovlev) Feeding
Source: Preprints.org preprint supplement (doi:10.20944/preprints201809.0058.v1), 2018-09-04
Supplement: Supplementary file 2 [file 3.2 Supplementary Material.docx]

Supplementary Material

Integrative proteomic and metabolomic analysis reveals the cotton plant defense mechanisms induced by insect (*Adelphocoris suturalis* Jakovlev) feeding

**Hui Lu1,2,3, Shuai Zhang 1, JunYu Luo1, ChunYi Wang1, LiMin Lü1, LiJuan Zhang1, XiangZhen Zhu1, Li Wang1, XueKe Gao1, HongXia Hua2, JinJie Cui1***

*** Correspondence:**Corresponding Author: Dr. JinJie Cui

Email: [aycuijinjie@163.com](mailto:aycuijinjie@163.com)

Plant Protection Department, Institute of Cotton Research, Chinese Academy of Agricultural Sciences, No. 38, Huanghe Road, Anyang 455000, Henan, People’s Republic of China.

Tel/Fax: 0086-0372-2562296

# Supplementary Data

Additional file 1:

Table S1. Total information of protein identification of each treatment and Information of 8302 proteins

Additional file 2:

Table S2. Upregulated and downregulated proteins of each treatment (P48E VS P0C; P48E VS P48C; P48C VS P0C).

Additional file 3:

Table S3. Pathway enrichment analysis of DEPs

Additional file 4:

Table S4. Significantly changed metabolites in the positive and negative ion mode

Additional file 5:

Table S5. Proteins changed in the alpha-linolenic acid metabolism pathway

Additional file 6:

Table S6. Parameters in iTRAQ analysis and metabolomics analysis, and primers used in RT-qPCR
