# Supplementary material for: Integrative Proteomic and Metabolomic Analysis Reveals the Cotton Plant Defense Mechanisms Induced by Insect (<em>Adelphocoris suturalis</em> Jakovlev) Feeding
Source: Preprints.org preprint supplement (doi:10.20944/preprints201809.0058.v1), 2018-09-04
Supplement: Supplementary file 4 [file Table S2 .xlsx]

## Sheet: P48E P0C up
P48E-VS-P0C_Up, 1015 (56%) proteins were upregulated
No.	Protein_ID	Mass	Protein Coverage	Uniq_Pep_Num	Uniq_Spec_Num	Mean_Ratio_P48E_113/P0C_121	SD_P48E_113/P0C_121	Qvalue_P48E_113/P0C_121	Protein_ID	Protein_Seqence	NCBInr Identity	NCBInr E-value	NCBInr Accession	NCBInr Description	Protein_or_Domain
14	Cotton_D_gene_10033280	38920.1	0.042	-|2|1	-|10|7	1.22	-	-|0.001|0.114	Cotton_D_gene_10033280	MGFSKLFVIILGLLLALTLDHCTAQEFRCSSPSSCRALVGYITVNNTNLGAIQSLFNVSSFQSLLGANDLPLSTPRNRTIAARQLIRVPINCACYNGTGTSSGGPTYTIQPGDGLYHIAAEVFSQLVLFPQIAAANNISNPDLIAAGDTLQIPLPCSCDDIDGQKVVHYAHVVEPNSTLPEIAQEFGTNEATLARINGITAQNQLKAEQPIDVPLKACNSSVRSDSLDFPLLAANGTYVFTANGCVRCTCEAANNWTLQCEPSQNRPSRWERCPSMQCEDSQGLSLGNVTTSGCSRTTCSYAGFNNSTIFTTLVQDSSCTTSTPSNDVSRINLKWDIVIISVLLSLHLVMLETI	57.05	2e-111	gi|224078525|ref|XP_002305553.1|	predicted protein [Populus trichocarpa]	DR0888
25	CotAD_04865	15704.9	0.448	3|2|2	97|59|80	1.9	0.005	0.001|0.001|0.001	CotAD_04865	MASCCNMASAASGFLPTPTVSAGTSKTNNNNMVFFPSKTNNTSRLVVRAADEASPPPPSPTPATTTAPPEGGEAPKPKPPPIGPKRGTKVKILRRESYWYNSYGSVVTVDQDPKTRYPVVVRFNKVNYANVSTNNYALDEIEEVK	65.93	4e-40	gi|255560287|ref|XP_002521161.1|	photosystem I reaction center subunit IV A, chloroplast precursor [Ricinus communis]	-
49	Cotton_D_gene_10038147	33198.3	0.219	3|3|4	58|73|64	2.92	0.06	0.001|0.001|0.001	Cotton_D_gene_10038147	MANPSCLLYAFLLLVAFQSTMMNANTVIQPPQCRPVAASSREKIIFSVNLLLYQAEFLLHASVDAGINDISPGLVQGPDPIGATIANFSNPVRRVVEELGLATVGHLRALVQAGILDAPITRPQMDVSAEAYAGFVNVAFNVSTLTPPFNIYANTPSFVAAAKGFSAFIQQYYAGIIPSIVGNVQQQLVTGIGLSQSAGLGVLRTLLNDVINSTVQPYTFTAAELSNRTSEVVNRLGGCGVKAEGLIVPLQLGAENRTTSNVVPGDVNSLAFVRFEREILSMVFGTGNATMPGGLFPRGFIGSLYRRNRDS	39.29	2e-59	gi|224061357|ref|XP_002300440.1|	predicted protein [Populus trichocarpa]	-
50	CotAD_04637	54435.5	0.07	2|3|3	7|11|18	1.36	0	0.004|0.002|0.001	CotAD_04637	MAVLSATKLLIFFFFSCHLSIFSSTATAVYTIGVNYGTIADNLPTPAQVANFLKTKTNIDRIKIFDTNPDILKAFAGTGISVTVTVGNGDIPSLAKLPGAKAWIEKNILPYHPKTIIRYIAVGNEILATSDKTLIAHLLPAMKALRSALDSANATSVKVSTPHSLGILSTSEPPSAGKFRKGYDKLIFAPILEFHKQTKSPFMVNPYPYFGFKPQTLDYSLFKPNGGVFDAGTGINYTNMFDAQLDAVYTAMKRVGYEDVDLVVAETGWPSVGDPGQPGVSLENALSYNGNLIKHVDSGKGTPLMPNRTFETYIFALFNENLKESVPERNFGLFKPDLNPVYDVGILRTPTRATAPSAATAPSAGKAPSSGSGKWCVAKSNASDAALQANIDYVCSSGV…	70.32	0	gi|255584220|ref|XP_002532848.1|	Glucan endo-1,3-beta-glucosidase precursor, putative [Ricinus communis]	-
74	Cotton_D_gene_10010093	24215.6	0.151	3|1|2	7|2|6	1.42	0.076	0.001|0.168|0.835	Cotton_D_gene_10010093	MAIQLNHFQSSLLKQEKQPKPLFFTSSKTKNFGVNTAASSSGQQLIQSGEVKPILPKDAATALNSEGFKLLDIRPQWEREKAYVKGSLHVPLFVKDMDNSPITLLKKWVHFGYIGLWTGQNFTMINPNFVQEVEATLPDKDAKLLVACGEGLRSMMATSKLYEGGYKNLGWLAGGFNRAADSDFPEIEGPEKLQYATIGGVSYYFLQLLLLLQAVGKE	74.77	2e-115	gi|255574353|ref|XP_002528090.1|	conserved hypothetical protein [Ricinus communis]	-
77	Cotton_D_gene_10037655	36868.4	0.182	4|-|1	9|-|1	1.76	-	0.007|-|0.261	Cotton_D_gene_10037655	MYRFPWVLLLVAAVNMAVAAEPLRPGFYSETCPPAEFIVRDVMKKAMIREPRSLASVMRLQFHDCFVNGCDGSLLLDDTADMVGEKQALSNINSLRSFEVVDEIKEALEDACPSTVSCADILVLAARDAVALSGGPDWEVRLGRTDSLTASQQDSDNIMPSPRADATSLINLFAQFNLSVKDLVALSGSHSIGKARCFSIMFRLYNQSGSGKPDPAIEPEFREKLNQLCPLGVDENVTGPLDATPRVFDNQFFKDLVGGRGFLNSDQTLFTSRRTRPYVRVFSKDQDEFFKAFVEGMLKMGELQVEQPGEIRTNCRVVNGRPVDVLMSY	99.7	0	gi|315307494|gb|ADU04153.1|	gaiacol peroxidase [Gossypium hirsutum]	-
116	CotAD_72038	115901	0.043	3|3|4	12|13|20	1.31	0.021	0.002|0.261|0.001	CotAD_72038	MALRLMMKLPLSSSKGLLFFYLVVLFSCSQSINAQTNQTNATTDPSEVKALISIFQQWDLEAPDTWNISGEPCSGTALTTSFSEFEDPSNNPAIRCDCSFNASTVCHITSLRVFGLDKRGVIPDEILELPYLDFLKIDKNFFSGSLPAFIGNLSRLGLLSIAQNNFSGPIPKEIGNLKKLYLLSLGNNDLSGTLPPELGNLVELGELYINSCGLSGEIPSSFANLKEMRIVWASDNAFTGKIPDFVGNWTKLTQLRFEGNSFEGPIPSSFSNLTSLNSLRIGDIYNGSSSSLDFVRNLKNLTDLVLRNVLLTGNFPSYITELQSLQKLDLSFNNLTGQIPSTLFNMNSLIYLFLGNNSLSGSIPSQKSETLQTIDLSYNFLSGNLPSWVNSRLQLNFVA…	68.97	0	gi|224072359|ref|XP_002303698.1|	predicted protein [Populus trichocarpa]	aq_576
127	CotAD_58452	30516	0.136	4|-|-	13|-|-	1.83	-	0.001|-|-	CotAD_58452	MVNAILYHQTSPLLLFQCCSSSHPPHIPRGLPGKLTLNCSIKSPPNKVIASHIVSGLASLIFLSQTNQVLAADLSHDPSICQLASATDNELTLPLEEDSGEGNGKLMMMRGMTAKNFDPVRYSGRWFEVASLKRGFAGQGQEDCHCTQGVYTFDMKTPAIQVDTFCVHGGPDGYITGIRGKIYSRTPNPGHEFIEKYKSYLSNYGYDPSKIKDTPQDCQVMSNSQLAAMMSMPGMQQALTNEFPDLELKAPVAFNPFTSVFDTLKKLLELYFK	51.03	2e-103	gi|462407428|gb|EMJ12762.1|	hypothetical protein PRUPE_ppa008302mg [Prunus persica]	-
132	CotAD_24510	29192.8	0.102	-|1|1	-|2|1	2.78	-	-|0.009|0.126	CotAD_24510	MSCDSSITKRLDGKVALITGGASGLGKCTATLFVKHGAKVLIADIQDELGDSVCQELGTENISYVHCDITCESDVENAVNLAVSKYGKLDIMFNNAGTHGDNETRVTHASTEDFKKVFDINVLGGFLGAKYAARVMVPAKKGCILFTSSLASKISFGSPHAYKASKHAVAGLTKSLAVELGEHGIRVNSISPHAISTPMFQKSIGIPDKKKGEEMIAASAVLKGTVLEPEDFAHAALYLASDEAKFISGVNLPLDGGYSLSNQSWKLGFAALFG	96.7	0	gi|89258498|gb|ABD65462.1|	short chain alcohol dehydrogenase [Gossypium hirsutum]	BS_ycdF
135	CotAD_27947	28991.6	0.727	2|1|2	3|1|6	1.64	0.025	0.010|0.370|0.001	CotAD_27947	MASTACFLHHHALAAAPRSSSTPPSTSQRQVAIVKSNQLLACTSQKQAVQENDDSGSNAVISRRLALTLLIGTAAVGSKVSPADAAYGEAANVFGKPKTNTEFIPYNGEGFKLSIPSKWNPSKEVEYPGQVLRYEDNFDSTTNVAVLVTPTDKKSITDFGSPENFLSKVDYLLGKQAYSGLTDAEGGFDSNAVATANILETSTPVIGGKQYYFLSVLTRTADGDEGGKHQLITATVNNGKLYICKAQAGDKRWFKGARKFVESAANSFSVA	77.86	4e-144	gi|356526942|ref|XP_003532074.1|	PREDICTED: oxygen-evolving enhancer protein 2, chloroplastic-like [Glycine max]	-
151	Cotton_D_gene_10023896	17169.8	0.178	-|1|-	-|6|-	1.65	-	-|0.003|-	Cotton_D_gene_10023896	VQDARGNDVDLSIYKGKVLLIVNVASQCGLTNSNYTELSKLYEQYKDQGFEILAFPCNQFGGQEPGNNEQILEFACTRFKAEYPIFDKVDVNGEKAAPIYKFLKSSKGGLFGDSIKWNFSKFLVDKEGHVVDRYAPTTSPLSIEKDIKKLLA	90.13	6e-101	gi|125620186|gb|ABN46985.1|	glutathione peroxidase [Nelumbo nucifera]	PA2826
157	CotAD_67539	70104.5	0.035	-|1|-	-|1|-	4.96	-	-|0.049|-	CotAD_67539	MIEEVVNVVVEGGAIPALVKHLQAPLSDEGDLSLKPFEHEVEKGSAFALGLLAVKPEHQQLIVDSGALSHLVNLLRRYKDSSTSRAVISVIRRAADAITNLAHENSSIKTRVRMEGGIPPLVELLEFTDTKVQRAAAGALRTLAFKNDENKNQIVECNALPTLISMLRSDDAAIHYEAVGVIGNLVHSSPNIKREVLAAGALQPVIGLLTSCCSESQREAALLLGQFAATDSDCKVHIVQRGAVRPLIEMLHSPDIQLKEMSAFALGRLAQDMHNQAGIAHMGGLVPLLKLLDSKNGSLQHNAAFALYGLADNEDNVSDFIRVGGVQRLQDGEFIVQATKDCVAKTLKRLEEKIHGRVLNHLLYLMRVAEKPVQRRVAFALAHLCSPDDQRTIFIDNNG…	90.53	0	gi|255552325|ref|XP_002517207.1|	protein binding protein, putative [Ricinus communis]	YNL189w
159	Cotton_D_gene_10025203	10959.5	0.312	2|2|2	3|7|7	1.25	0.042	0.814|0.040|0.295	Cotton_D_gene_10025203	MPRGSSQSQSQSSTSSSTSRPGVMAPRGSAAAAAGMRRRRIVGGSSSATASGSVGSGSGGNMLRFYTDDAPGLKISPTVVLVMSLCFIGFVTALHVFGKLYRAKAGAGP	97.92	5e-26	gi|357453827|ref|XP_003597194.1|	Protein transport protein Sec61 beta subunit [Medicago truncatula]	-
166	Cotton_D_gene_10012408	52681	0.067	1|3|2	2|4|4	1.72	0.063	0.146|0.002|0.043	Cotton_D_gene_10012408	MGPRSPPKRVSISHSFTSFFLGFLIPCINAAPLGPESDRVIKLPSQPATPSISQFSGYVTVNEEHGRALFYWFFEAQSEASKKPLLLWLNGGPGCSSIAYGAASELGPLRVGENGVDLHFNEFAWNQESPVGVGFSYTNTTSDLTKLDDAFVAEDVYMFLVEWLQRFPHFKTRDFFISGESYAGHYVPQLAELVYDRNNDTTRYPFINLQGFMVGNPVTDDNYDYTGIMDYAWSHSVISDEFYHKIKQACDFKELNWSTECNALVNQVFDTYSEIDIYNIYDPKCLINTTSSATANKIKFDGLNRVRILAEGYDPCYSPYSEMYFNRPDVQTSIHADSRGEKWVSCKDSILNSYNFSVFSVLPVYEKLIKGKLKIWMYSGDMDGRVPIISSRYCVEALG…	70.91	0	gi|224112026|ref|XP_002316057.1|	predicted protein [Populus trichocarpa]	SPAC1296.03c
170	Cotton_D_gene_10036391	14156.6	0.159	2|2|-	4|6|-	2.32	-	0.001|0.001|-	Cotton_D_gene_10036391	MAHSLTPVPATSITPIAKSTKLASHIPTLRLQTVSASYQTPHHVLDDKLVHRRTVTLSLAGAMLSLNVGDQRQANAARRPPPPPPEEKKDPSVSGVQAKVLASKKRKEAMKQAMAKMREKGKPVDGTSPPSE	56.06	5e-32	gi|224121936|ref|XP_002330690.1|	predicted protein [Populus trichocarpa]	-
182	CotAD_45089	76611.4	0.01	1|-|-	2|-|-	2.46	-	0.012|-|-	CotAD_45089	MASLKLSLSWDSVDSKKLSFYVNPSHLPDQCSSFSFTSCFHVARAASMLTSLTRLKHIRVEPANVPDPNPVDRDTPFSSKNELVNENPKLVEGRKGQNRKKGITRNVDFRFGSRRSGNEVEKGDLFVCRNSGLDVDYTAIKPDLNLEHCNSILKRLEKSNDGNALRFFEWMRSNGKLDGNVTAYRLVLRVLGRRQDWDAAEILVRQAKCDSGCELDFQVFNTIIYACSKRGIVEMGAKWFRMMLEHGVQPNVATYGMLMGLYQKGWNVRDAEFALSQMRSSGIVCQSAYSAMITIYTRLSLYDKAEEVISFMREDKVALNLENWLVMLNAYSQSGKLEEAEQVLVSMQEAGFSPNIVAYNTLITGYGRASNMDAAQLVFLSIRQVGLEPDGTTYRSMIE…	64.08	0	gi|255574996|ref|XP_002528404.1|	pentatricopeptide repeat-containing protein, putative [Ricinus communis]	-
188	CotAD_61343	15435.6	0.301	1|3|5	7|6|26	1.21	0.026	0.104|0.878|0.001	CotAD_61343	MARTKQTARKSTGGKAPRKQLATKAARKSAPTTGGVKKPHRYRPGTVALREIRKYQKSTELLIRKLPFQRLVREIAQDFKTDLRFQSHAVLALQEAAEAYLVGLFEDTNLCAIHAKRVTIMPKDIQLARRIRGERA	100	3e-95	gi|147826736|emb|CAN70652.1|	hypothetical protein VITISV_010022 [Vitis vinifera]	YKL049c
193	CotAD_18152	52291.9	0.231	1|1|1	5|6|6	2.06	0.023	0.001|0.001|0.006	CotAD_18152	MHDFSGYPVDESSHTFTPSNSISLSVDIQALQKQIDELSTFSDTPAPSVTRILYTENDVLARRYVKNLMGLAGLSVTEDVVGNIFGRWDGYEPELTAVATGSHIDAIPYSGKYDGVVGVLGAIEAINALKRSGFKPKRSLEIILFTSEEPTRFGISCLGSRLLAGSEALAEALKATVDGQNISFLEAARSAGYARDEDDLSRVFLKNDSYSAFVELHIEQAPILEEEGISIGVVTNIAAPASIKVDFEGNGGHAGGVLMPDRNDAGLAAAKLMLAIEKHATESGSLDTVGTVGILELYTGAINSIPSKAHLEIDLFLIFGRSLEGHIPVLIFIYALDIGVEDGYFRKNEELEQHDVRDIEESFRNAVINKIHKAAKSIAKKRKVTLSEFKIINQDPPAH…	71.46	0	gi|462419865|gb|EMJ24128.1|	hypothetical protein PRUPE_ppa005238mg [Prunus persica]	AGc4327
227	CotAD_54165	17470.9	0.365	1|1|1	2|2|2	4.52	0.867	0.005|0.023|0.024	CotAD_54165	MGVVTYEFEVTSLVAPTRLFKAFVLEGAKVYPKAAPHAIKSVELEGDGKPGSIVKINFVEGLPFQYMKHMIGGHDESNLSYSYSLIEGGPLGDKLEKISYENQFVADASGGSVCKSSIKFYTIGDYVITEDEIKALIQRSEVVYKAIEAYLLANTDACN	83.65	7e-97	gi|15811629|gb|AAL09033.1|AF416652_1	ribonuclease-like PR-10 [Gossypium arboreum]	-
239	CotAD_16946	28444.9	0.196	4|3|3	10|8|10	1.57	0.011	0.006|0.001|0.001	CotAD_16946	MLAIFHKAFANPPEELNSPASHKSTKKPKQPEETLNDFLSHHPHNTFSMSFGNAAVLAYVRHERAASVHQRLFCGFDDIYCLFLGSLNNLFMLNRQYGLSKGSNEAMFVIEAYRTLRDRGPYPADQVVKDLEGSFAFVIYDSKTGTVFAALGSDGGVKLYWGIAADGSVVISDDLDVIKEGCAKSFAPFPTGFMFHSEGGLMSFEHPMNKIRAMPRVDSEGVICGANFKVDVYSRVNSIPRVGSATNWTDHWDSH	84.31	3e-162	gi|284521002|gb|ADB93076.1|	stem-specific protein tsjt1, putative [Jatropha curcas]	-
247	CotAD_04172	39062	0.192	1|2|2	2|6|8	1.2	0.001	0.645|0.137|0.030	CotAD_04172	MEGIAFSPSNNFHCYPQIHPIKTLTPIPFRFCNYKTNNPNQSLLSFSINSSKTSQTPITQPPPLVVVGSANADIYVEIDRLPTEGESISAKNGQTLAGGKGANQATCGAKLSYPTYFVGQVGDDAHGKLITQALGNGGVRLEYLKSLGGGVPTGHAVVMLQSNGQNSIIIVGGANMSSWPDKLSDQDLDVVKNAGIVLLQREIPDSVNIQVAKAAKGAGVTVIMDAGGMDAPMPQELLKFVDIFSPNESELGRLTGMPTDNFEQISQAAAKCHKMGVKQVLVKLGAKGSALFIEGEEPITQPIIPAAQVVDTTGAGDTFTASFAVALVEGKSKRESLNFAAAAASLCVQVKGAIPSMPDRKSVLNLLQSL	74.27	0	gi|224117100|ref|XP_002317476.1|	predicted protein [Populus trichocarpa]	Cgl2273
248	Cotton_D_gene_10017746	73682.1	0.552	-|3|3	-|25|23	1.23	-	-|0.001|0.001	Cotton_D_gene_10017746	MAGSWRARGSLVVLAIVLFGCLFAISIAKEEATKLGTVIGIDLGTTYSCVGVYKNGHVEIIANDQGNRITPSWVAFTDSERLIGEAAKNQAAVNAERTIFDVKRLIGRKFDDKEVQKDMKLVPYKIVNKDGKPYIQVKIKDGETKVFSPEEISAMVLTKMKETAEAFLGKKIKDAVVTVPAYFNDAQRQATKDAGVIAGLNVARIINEPTAAAIAYGLDKKGGEKNILVFDLGGGTFDVSILTIDNGVFEVLSTNGDTHLGGEDFDHRVMEYFIKLIKKKHGKDISKDNKALGKLRREAERAKRALSSQHQVRVEIESLFDGIDFSEPLTRARFEELNNDLFRKTMGPVKKAMEDAGLEKRQIDEIVLVGGSTRIPKVQQLLKDYFDGKEPNKGVNPDE…	96.25	0	gi|211906506|gb|ACJ11746.1|	luminal binding protein [Gossypium hirsutum]	YPO0468
270	CotAD_24184	54030.4	0.202	1|1|1	4|3|5	1.47	0.064	0.229|0.021|0.010	CotAD_24184	MGQSRFIDFLFVLLTCFTCFSSSFGDQNLDKITELPGQPKNVDFNQYSGYVTVNEEAGRALFYWFIESPLNRRPETRPLILWLNGGPGCSSVAYGAAEEIGPFRIRPDGKTLYFNPYAWNKLANTLFLESPAGVGFSYTNTTSDLYTSGDKRTAEDAYVFLVNWLERFPQYKYRDFYIAGESYAGHYVPQLAQIVYERNKGVQIPVINFKGFMVGNAVTDDYHDFVGTFEYWWTHGLISDSTYRNLQVACDMGSATHPSSECTTALEVAEAEQGNIDPYSIFTQPCADTTSLRRNLRGHYPWMSRAFDPCTERYSKEYFNRPEVQKALHANVTGIPYQWETCSDVIGYNWTDSPLSMLPIYQELIAAGIRIWVYSGDTDAVVPVTATRYSIDALKLPTI…	83.64	0	gi|224100813|ref|XP_002312024.1|	predicted protein [Populus trichocarpa]	SPAC1296.03c
272	CotAD_68215	51835.6	0.25	2|2|1	4|4|2	2.58	0.32	0.037|0.069|0.008	CotAD_68215	MSWKFSVSHSLPLFLLLFLYSFPLISTQQNDDPTFKTMHDFSGYPVDKSSYTFTPSNSSSLSVDIQALQKQIDELSTFSDTPAPSVTRILYTENDVLARRYVKNLMGLTGLSVTEDVVGNIFGRWDGYEPELTAVATGSHIDAIPYSGKYDGVVGVLGAIEAINALKRSGFKPKRSLEIILFTSEEPTRFGIGCLGSRLLAGGEALAEALKTTVDGQNISFLEAARSAGYARDEDDLSSVFLKNDSYSAFVELHIEQAPILEEEGISIGVVTNIAAPASIKVDFEGNGGHAGGVLMPDRNDAGLAAAELMLAIEKHVTESGSLDTVGTVGILELYPGAINSIPSKAHLEIDVRDIEESFRNAVINKIHKAAKSIAKKRKVTLSEFKIINQDPLAHSNGS…	77.43	0	gi|462419865|gb|EMJ24128.1|	hypothetical protein PRUPE_ppa005238mg [Prunus persica]	AGc4327
279	CotAD_22466	24897.5	0.29	3|2|-	5|2|-	2.44	-	0.008|0.100|-	CotAD_22466	MKTTTVSVFLLFIIFSITPSSFLFGVANATNEPVLDIDGNEVQTGTPYYVVSSIWGAGGGGLSLGMPSRKKCPEVVAQRGSGDDGIPVIFSNSDSNDGVVRLSTDINIEFIPLRPRLCQTTTVWKVDDYDHSAGKWWVITDGVKGNPGANTLTSWFRIEKVNDLDYKFKYCPAVCGTCPALCNEIVRDSDGEMIRLALSTGHGWPFYFKKAKKLAREIQQVVHV	61.78	2e-87	gi|55139090|gb|AAV41233.1|	putative 21 kDa trypsin inhibitor [Theobroma bicolor]	-
284	CotAD_41010	17035.8	0.312	5|3|3	11|7|12	1.34	0.013	0.001|0.086|0.001	CotAD_41010	MVRRTTEAKEILVGGKTDAWKIPSSESDSLNRWAEKSRFRIGDSLVWKYDGGKDSVLQVTKEAYASCNTSNSIAEYKDGNTKVKLDRSGPFYFISGAKGHCEQGQKLHVVVLSQKHRYTGISPAPSLAEIDGPAIAPTSSAAGLKAGFLVTLGVVVF	79.19	2e-87	gi|115393868|gb|ABI96983.1|	phytocyanin-like arabinogalactan-protein [Gossypium hirsutum]	-
308	CotAD_40855	62640.6	0.275	11|1|1	108|19|18	1.29	0.001	0.001|0.001|0.001	CotAD_40855	MAFSGERKKKLFLALFASILLVTAIVTIATTVSISKKKSSNTVAAHSIIKSSCSSTLYPELCYSTISSAPDAETKVKNPKDVIELSLNLTVTAVQSNYLSIKKLISTQRKSLTEREKAALNDCLELVDETLDELFVAEHDLSDYPSFNKSISQHADDLKSLLSAAMTNQETCLDGFSHDKADKKVRQALLDGQMHVFHMCSNALAMIKNLTDTDMASQGYHPSSGRQLEEQDQTEWPKWLSEGDRRLLQATTVIPNVTVAADGSGDFLTVSEAVAAAPERSTTRYIIKIKAGVYRENVDVPSKKTNLMFVGDGRVNTIITASRNVVDGSTTFHSATVAAVGDGFLARDITFQNTAGPSKHQAVALRVGSDLSAFYRCGILAYQDTLYVHSLRQFYSQCL…	100	0	gi|377824751|gb|AFB77928.1|	pectin methylesterase [Gossypium hirsutum]	RSp0138
318	Cotton_D_gene_10027371	29969.3	0.148	4|3|3	9|8|11	1.21	0.01	0.002|0.681|0.003	Cotton_D_gene_10027371	MADDEVKDEVPEITSFDPTKKKKKKKVVIQDPADESVDKLAEKTEALSVSEGLDFSNLKKKKKKPVEGNTFTDESGDAGDDFDGHIDGDEEGEGIVLQQRYPWDGTDRDYIYDELLGRVFNILRENNPELAGDRRRTVMRPPQVLREGTKKTVFVNFMDLCKTMHRQPDHVMAFLLAELGTSGSLDGQQRLVVKGRFAPKNFEGILRRYINEYVICLGCKSPDTILSKENRLFFLRCEKCGSGRSVAPIKAGFVARVGRRNAGT	85.87	2e-144	gi|225434323|ref|XP_002265847.1|	PREDICTED: eukaryotic translation initiation factor 2 subunit beta [Vitis vinifera]	SPAC2F7.05c
332	CotAD_08793	37760.7	0.652	1|1|2	14|4|7	1.26	0.008	0.001|0.065|0.098	CotAD_08793	MAIEIPRVKLGTQGFEVSKLGFGCMSLTGHDHSVSDEDGIAIIKHAVERGVTHIDTADLYGPKTNEILVGKALKHLPREKVQLATKFGVESMGPDGPVINGTPEFVRSSLEASLQRLDVDYIDLYYIIRVDRKTPIEDTMEELKKLVEEGKIKYIGISEASPETIRRAHAVHPLTAVQLEWSLWTRDVEEELIPLCRELGIGIVAYSPLGHGFFAGKAKEDTSNSSLEVYPRFQGENLEQNRILYSKVEKLAEKHGCTPAQLALAWVLHQGDDVSPIPGTTKIKNLDSNIESVKVKLTKEDLKEISDAIPIHEVAGGTYPEGLKQFTWKYGNTPPKKRT	69.12	8e-171	gi|470132346|ref|XP_004302044.1|	PREDICTED: probable aldo-keto reductase 1-like [Fragaria vesca subsp. vesca]	ydjG
336	CotAD_16235	28745.9	0.356	5|5|6	16|11|12	1.34	0	0.001|0.001|0.004	CotAD_16235	MGKGPGLYTDIGKKARDLLYKDYQADHKFTLTTYTSNGVAITSTGTKKGELLLADISTELKNKNITTNVKLFATVTVDEPAPGLKTIFSFIAPDQRSGKVELQYQHEYAGISTSIGLTANPLVNFSGVVGNNSVTVGTDLSFDTASGNFTKLNAGLNFTHSDLIASLTLNDKGDTLNASYYHIVSPLTNTAVGAELSHSFSSNENTLTIGTQHALDPLTTVKARLNNYGRASALIQHEWRPKSLITISGEVDTGAIEKSAKVGLALALKP	83.7	1e-158	gi|255558216|ref|XP_002520135.1|	voltage-dependent anion-selective channel, putative [Ricinus communis]	-
341	CotAD_09205	44477.7	0.106	4|5|4	24|24|14	1.62	0.013	0.001|0.001|0.001	CotAD_09205	MTSLIITCLLFGFCSALKEGQTCVSDGNCDSGLHCETCVANGNVRPRCTRIQPVNPTSKVKGLPYNRYSWLTTHNSFARLGKKSATGSLILAPTNQQDSITDQLNNGVRGLMLDMYDFQNDIWLCHSFGGQCFNNTAFQPAINVLKEIQAFLEANPSEIVTIIIEDYVTSPRGLSKVFDAAGLRKFWFPVSRMPKNGGSWPTVDDMIQKNQRMVVFTSKSAKEASEGIAYQWRYMVENQYGNGGMIAGSCPNRAESPAMNATSRSLVLINYFPDIPDVTQACRHNSAPLISMMNTCHVAAGNRWPNFIAVDFYKRSDGGGAPEAIDVANGHLVCGCENIVICRANMTFGVCDMPEADISPAPATKPVAHDSSFANLESRPVPLQWLFISILVAILLQL	76.96	0	gi|356502505|ref|XP_003520059.1|	PREDICTED: PI-PLC X domain-containing protein At5g67130-like [Glycine max]	-
353	CotAD_17884	33996	0.283	5|6|7	48|33|44	1.79	0.005	0.001|0.001|0.001	CotAD_17884	MVLSESFRSIQLPPNVTGPESIAFELATGRFYVGVTDGRILQYNGPTVGFVEFGSTGRNRTKTMCDGITDPDLGPMCGRPFGLGFHYATNQLYVCDAYLGLMVLGSGRRLATPLSTGVEGVPYRFCNGLDVHQLSGNVFFTDSTTNYDLRNASKGLESNDSTGRLLMYNPSNNRVTVLLKNLPGPAGVAVSQDGLYALVSNYNANNTIRFWLRGPRADTYEIINFQARPNNIQRTLVGDFWEAAAMVKQSTQTLVPIGQRISGLGLVLQTVNFERWYGNKLISEVQEFRDALYVASPDVDFIGIYSF	53.8	1e-113	gi|359491389|ref|XP_002274134.2|	PREDICTED: strictosidine synthase 1-like [Vitis vinifera]	mll1724_2
357	CotAD_76598	17056.9	0.387	4|1|2	19|6|8	1.77	0.004	0.001|0.001|0.001	CotAD_76598	MAAADVEFRCFVGGLAWATDDRALEEAFSAFGEIVESKIINDRETGRSRGFGFVTFRDEKAMRDAIEGMNGQNLDGRNITVNEAQSRRSGGGGGGFGGGNGGYSRGGGGGGYGGRQGGYGGGRREGGYGNGGGYGGGGYGGGRREGGYGDGGSRYSRGGGASEGNWRS	100	4e-55	gi|211906474|gb|ACJ11730.1|	glycine-rich RNA-binding protein [Gossypium hirsutum]	alr0741
369	CotAD_09374	25651.1	0.333	3|1|2	6|3|3	1.42	0.022	0.010|0.710|0.057	CotAD_09374	MAGELVLLDFWPSPFGMRSRIALAEKGIPYEYREEDLRNKSDLLLQMNPVHKKIPVLIHNGKPVCESVIQVQYIDEVWHDKAPLIPSDPYQRAVARFWVDFVDKKIYDLGSKIWKTKGEEQANAKKEFIECLKLLEGELGDKTYFGGESLGYVDVALVPFYTWFYAYEKCGDFSIEAECPKMIAWVKRCMQKESVAKSLPDQEKVYEFVLQLKKLFGIE	83.56	3e-138	gi|29419702|gb|AAO61854.1|	glutathione S-transferase U1 [Malva pusilla]	mll0559
373	Cotton_D_gene_10002087	109717	0.082	6|-|3	7|-|7	1.19	-	0.010|-|0.733	Cotton_D_gene_10002087	MQYSNNGKLKRQTVGTSAESHAAELLSVKAIQCLKTLLIIHLSDVTVPSKIPPSATLLDCISISLCFPSSLPYIILIFLFNFHLCFDDLRRVFSLEKRGRIPEELLAFRYLNFLKIDQNFFTGPLPAFIGNMSRLGLLSVAQNSLSGPIPKEIGNLKELYLLSLGINNFSGTIPPVLGNLVELQQLYINSCGLTGEIPSTFANLQNLQIVGASDNAFTGKIPEFIGSNWTKLASLRLEGNSFEGPIPSNIGNLTSLTILRITGIYNGSSSLDFVRNLKNISDLVLRNVLLTGSIPSDISDFQSLQKLFLGNNSLSGTLPSQKSEILKSIDVSYNQLSGNLPPWIDSSLQLNVVANNFTLNSSDIRLLPGLQCLQRGFPCNRNSPRYANFAIKCGGPQMT…	67.92	0	gi|224072359|ref|XP_002303698.1|	predicted protein [Populus trichocarpa]	DR2518_1
385	CotAD_05411	30526.6	0.246	4|4|3	15|11|7	1.14	0.005	0.002|0.157|0.460	CotAD_05411	MLRVATRRLTSCSSAWRSHQATSAIASRPFIDGSDSSDCLRSNFSSSSFSFSFASQFLLPTRGFASESLTPKSDHSVIPDVPATVAAIKNPSSKIVYDEYNHERFPPGDPSKRAFAYFVLTGGRFVYASVIRLLILKLVLSMSASKDVLALASLEVDLSSIEPGSTVTVKWRGKPVFIRRRTDEDIKLANSVDLGSLRDPQEDAARVKNPEWLIVVGVCTHLGCIPLPNAGDYGGWFCPCHGSHYDVSGRIRKGPAPYNLEVPTYTFLDESKLLIG	79.29	5e-153	gi|462411948|gb|EMJ16997.1|	hypothetical protein PRUPE_ppa009909mg [Prunus persica]	aq_045
417	CotAD_64828	11941.9	0.103	1|1|1	58|52|26	1.18	0.005	0.001|0.001|0.001	CotAD_64828	MAQKMLMMAVLVILGTKIATVTAADPTCLQRLMSCTPYLNNATLQLQGDCCDPLRQAVATELTCLCSLINNSTLLRSFNIPIAAALRITRGCGVTDQMNGCIPGQCF	41.98	9e-18	gi|357123498|ref|XP_003563447.1|	PREDICTED: lipid transfer-like protein VAS-like [Brachypodium distachyon]	-
445	Cotton_D_gene_10001521	32979	0.214	-|1|-	-|2|-	1.29	-	-|0.011|-	Cotton_D_gene_10001521	MAAAARVIAIAGNSTAAASSCLLIKTPFALQRCSNGLRFNNVRRSSKRLFSCNAIYNPQVQIKREGQPETLDYRVFFEDNSGKKISPWHDVPLHLGDGVFSFIVEIPKESSAKMEVATDELYTPIKQDTKKGKLRYYPYNINWNYGLLPQTWEDPSLANSEVEGAFGDNDPVDVVEIGESRRKIGDILKVKPLAALAMIDEGELDWKIVAISLDDPRASLVNDIDDVEKHFPGTLTAVRDWFRDYKIPDGKPANKFGLGNKAANKDYALKVITETNESWAKLVKRSIPAGELSLV	82.7	2e-175	gi|224103823|ref|XP_002313207.1|	predicted protein [Populus trichocarpa]	CT772
471	Cotton_D_gene_10025340	71718.5	0.411	3|3|3	4|18|18	1.81	0	0.001|0.001|0.001	Cotton_D_gene_10025340	MAAKAEGKAIGIDLGTTYSCVGVWQNDRVEIIANDQGNRTTPSYVAFTDTERLIGDAAKNQVAMNPQNTVFDAKRLIGRRFSDPAVQADMKHWPFRVVAGPGDKPMIVVNYKGEEKQFAPEEISSMVLVKMKEVAEAYMGQTVKNAVITVPAYFNDSQRQATKDAGSISGLNILRIINEPTAAAIAYGLDKKASRSGEKNVLIFDLGGGTFDVSLLTIEEGIFEVKATAGDTHLGGEDFDNRLVNHFVQEFKRKHKKDISTNARALRRLRTACERAKRTLSSTAQTTIEIDSLYEGIDFYSTITRARFEELNMDLFRKCMEPVEKCLRDSKIDKSQVDEVVLVGGSTRIPKVQQLLQDFFNGKELCKSINPDEAVAYGAAVQAAILSGEGNEKVQDLLL…	94.32	0	gi|255543359|ref|XP_002512742.1|	heat shock protein, putative [Ricinus communis]	RC0233
475	CotAD_27509	18682.2	0.329	1|1|1	6|16|15	1.83	0.094	0.001|0.001|0.001	CotAD_27509	MAAMNSSVLACNYAISGTGSSELNAKLASAPSVASPVMCGGHKLPVIRAQQAKFSDSKGSGASEGRRAAMLYLAAGLFTTAVASSANAGVIDEYLEKSKANKELNDKKRLATSGANFSRAYTVQFGTCKFPENFTGCQDLAKQKKVPFISDDLALECEGKDKYKCGSNVFWKW	83.91	3e-98	gi|118488894|gb|ABK96256.1|	unknown [Populus trichocarpa x Populus deltoides]	-
488	Cotton_D_gene_10004890	47187.7	0.231	2|4|5	5|5|7	1.28	0.021	0.224|0.033|0.191	Cotton_D_gene_10004890	MMQQPAAGGVAPPPPMAADQSQAHQYQQQPQSQPWMMMSQQQQGGQPVPPPTGWTPQPVPPPTQMQQYSAGSAAGSGEIRSLWIGDLQPWMDENYLINIFAQTGEVVSAKVIRNKQSALPEGYGFIEFVSRVAAERVLQSYNGLPMPNAEQNFRLNWASLGSGEKRQEEGPEYTIFVGDLAADVSDYMLQETFKAVYPSIKGAKVVTDRTTGRSKGYGFVRFADESEQIRAMTEMNGMYCSTRAMRIGPASNKKPVTGQPYQKATYQNAQGNPGENDPSNTTIFVGGLDPSVSEDQLKQIFSQLGEVVHVKIPANKNCGFVQYANRASAEQALSVLNGTIFGGRNVRLSWGRSPSTKQAQPDPAQWNSGYYGYAQGYEAYGYAPPPQDPNMYYGGYPAG…	76.21	2e-168	gi|224115306|ref|XP_002316998.1|	predicted protein [Populus trichocarpa]	ECU03g0730
489	CotAD_59071	10895.3	0.125	1|1|1	3|2|2	1.68	0.033	0.003|0.278|0.119	CotAD_59071	MSGQQEEDKKPGDQSAAHINLKVKGQDGNEVFFRIKRSTQLKKLMNAYCDRQSVDFNSIAFLFDGRRLRGEQTPDELEMEDGDEIDAMLHQTGGTV	98.96	8e-66	gi|399963774|gb|AFP65785.1|	SUMO peptide [Gossypium hirsutum]	ECU07g0660
495	CotAD_61994	32184.5	0.114	2|1|2	4|2|2	1.41	0.005	0.015|0.448|0.452	CotAD_61994	MASPLSPIHHLPFLSSTSTATTLTRRSLLLSSTLTTTLPTTPLSLPPQLDTNITDRVYLDFSLCPTYFRNATAADSTPLCSDPSPLGRLVLGLYGNLLPLTVSTFKRMCTSSSYKNTLVHKIFPGQFFQAGRQGRSREYGEVRLPPALDLPRNTETVDSKAFLLKHSRPGVVSLCLSENDDDDEVKLDSEYRNVEFLITTGPGPCPQLDNNNIVFGTVLEGLDVVTAIASIPTYKPSERIRQLNDLAEFFGDERAQKGRTLWNRPLKTVYISDCGELQVTKPSMSPTLP	78.24	2e-118	gi|255565115|ref|XP_002523550.1|	peptidyl-prolyl cis-trans isomerase, putative [Ricinus communis]	YCR069w
496	Cotton_D_gene_10025048	36865.1	0.241	-|5|5	-|13|19	1.51	-	-|0.001|0.001	Cotton_D_gene_10025048	MPGVNPEIEFPAIEFRSSDLKRGTEGWNRLCKRVQEACETFGCFEVVYEKVSTKLREDAFGLMKEMVELPVETKQKNNSPMPYHGWVGPCKQVSVLYEGFGVGDASNYDSVKSFAQLMWPNGHPHFSDTIHTLGTQMEELNKLIWLMLIDSYGLGDDSLKMNYTTLVRMMKYMAPPPGEYERGLFAHTDKPVSTLICEDQISGLEIEVNDGQWIKLTNLSPSSFVFVVGDPLKAWSNGRLKSVNHRVMMSGDKDRYSIAAFVIPNEGTIIKTPKEFIDDQHPRLFKDLDFMEFFLYAFSDPARHIDNGELLHVFAGLSPPVSN	49.54	7e-115	gi|470113512|ref|XP_004292967.1|	PREDICTED: gibberellin 3-beta-dioxygenase 3-like [Fragaria vesca subsp. vesca]	CC0200
503	CotAD_48568	13634.1	0.06	1|1|1	3|3|4	1.62	0.112	0.003|0.318|0.023	CotAD_48568	MGLLSIIRKIKRKEKEMRILMVGLDNSGKTTIVLKINGEDTSVISPTLGFNIKTITYQKYTLNIWDVGGQRTIRSYWRNYFEQTDGLVWVVDSSDLRRLDDCKMELDNLLKEELRC	100	2e-64	gi|255560980|ref|XP_002521502.1|	ADP-ribosylation factor, putative [Ricinus communis]	ECU03g0470
509	CotAD_72686	88103.2	0.153	2|2|2	7|5|5	1.58	0.026	0.002|0.012|0.004	CotAD_72686	MWPDLIQKAKEGGLDVIQTYVFWNGHEPAPGMYHFEGNYDLVKFIKLVKRAGLYVHLRIGPYVCAEWNFGGFPVWLKYIPGIKFRTNNRPFKAQMQRFTEKIVGMMKAERLFESQGGPIILSQIENEYGPMEYELGAPGKAYSDWAAKMAVGLGTGVPWVMCKQDDAPDPIINTCNGFYCDYFSPNKAYKPKMWTEAWTGWYTEFGGAVPYRPAEDMAFAVARFIQKGGAFINYYMYQGGTNFGRTAGGPFIATSYDYDAPLDEYGLKRQPKWGHLKDLHRAIKLCEPALVNGDPTVIRLGNYEEAHVFNYKTGGCAAFLANYNPNSYAKVAFRNMHYNLPPWSISILPDCKNTVYNTARVGAQISRKKMVPVPMHGGFSWEACNEETASDVDSTFTMV…	85.84	0	gi|118488890|gb|ABK96254.1|	unknown [Populus trichocarpa x Populus deltoides]	PAB1349
517	CotAD_35632	20901.7	0.215	4|4|4	28|25|25	1.94	0.002	0.001|0.001|0.001	CotAD_35632	MASSMSSSPSSLLLPLGSASEKKLYANHMAFSNIRAQAIIVRSSSCKTRKYSNGPDLVTRRDVMGLLFGVPIISLNSPDADGAGLPPEEKPKLCDDACEKELENVPMVTTESGLQYKDIKVGEGPSPPVGFQVAANYVAMVPSGQIFDSSLEKGQPYIFRVGSGQVIKGLDEGILSMKIGGKRRLYIPGPVSSLL	69.1	9e-82	gi|462423035|gb|EMJ27298.1|	hypothetical protein PRUPE_ppa010867mg [Prunus persica]	SPBC839.17c
518	CotAD_24554	40167.7	0.171	-|-|4	-|-|27	1.55	-	-|-|0.001	CotAD_24554	MDTQSFLFSVFCFLFYFLSGEPQVVEGTRLSWTSSPFGFKPKMLFAFGDSYADTGNTKIAVTRSWHFPYGITFPGKPSGRFSDGFVSTDFVAGYLGMKTPIPYRWRKELSGRVKYGLNFAYGGTGVFDTLVAEPNMTTQIDFLQQLINDSVYTKRVLRTSVALVSLAGNDYSYYLETNGSAAAFPGFIQSVVNQLMVNMKRIHDLGVRKIGVMSLIPLGCTPQNTAGSSFQRCNETENDLVMLHNNLLLQAVNTLNQQTNSTLFFIIDLHNAFSTVFNGTEIHQGSPTFENPFEPCCFGVTEGFFCGSVDENGGKKYTLCSNPKTKLFWDGNHPTSEGWRAIYSTPAFQNTLKQFID	58.62	1e-140	gi|255575625|ref|XP_002528712.1|	carboxylic ester hydrolase, putative [Ricinus communis]	-
522	CotAD_46335	35029.1	0.075	1|2|2	2|2|2	1.71	0.09	0.037|0.370|0.115	CotAD_46335	MASFDAYGMEGEEVHAGAAPNNHPFDVDDDESYSNYGSYSNFTDNQQFPADGGDVAVDHLASSPEIFGFGSPVENGNGTNGFSGGNDDVFSSDGPVLPPPTEMAPEEGFLLREWRRQNAIQLEEKEKKEKELRNQIIEEAEEYKRAFYEKREKTIETNKTNNREREKLYVANQEKFHKTADTHYWTAIAELIPREVPNIEKRGKKDAEKKPSVFVVQGPKPGKPTDLSRMRHILVKLKHSPPPHMIPPPPAPAKDTKDGKDAKDGKDSKNVDKAASNGTAEKGATVSSAKDGAATSAEQDAAATTAPAKDQTVAEPEATAA	60.31	3e-89	gi|388491146|gb|AFK33639.1|	unknown [Medicago truncatula]	-
538	CotAD_11004	47163.2	0.073	3|3|-	8|10|-	1.56	-	0.001|0.001|-	CotAD_11004	MKLLWVWVVLPFAFAQLVTAFFDFNKTELSLIESLEYGVSKINYNPLMVGLTLIHTAGAKGAVCLDGTLPGYHWHRGYGSGANSWLVQLEGGGWCNNIRTCVYRKKTRRGSSTYMEKQIPFTGILSEKAEENPDFFNWNRVKLRYCDGASFTGDSENKGAQLQFRGQRIWLAAMEDLMSKGMRYANQALLSGCSAGGLAAILHCDEFRGLFPRTTRVKCLSDAGLFLDAVDLSGGHTIRSLYSGVVGLQGVQHNLPRICTNHLDPTSCFFPQNVINHIRTPLFILNAAYDSWQIQSSIAPPSVDPHGYWHDCRLNHAKCSASQLRYLQGFRTQMLNAIKGFSMSRENGLFINSCFAHCQSERQDTWFADNSPEIRNKPIAIAVGDWYFDRTAVKVVDCP…	77.46	0	gi|356571042|ref|XP_003553690.1|	PREDICTED: uncharacterized protein LOC100788448 [Glycine max]	-
548	CotAD_16004	20734.1	0.5	6|6|7	21|18|50	1.62	0.003	0.001|0.001|0.001	CotAD_16004	MASLDSKESPANNPGLHFPPDEATKGYIMQQTMFRIKDPKRTLEFYSRVLGMTLLNKVDVPYMKMTLYMMGYEDVSSAPTDPVEKTIWTFGRPATMELTHFWGTENDPEFKGYHDGNSEPIGFGHIGLTVDDLYKACERFESLGVEFVKKPSDGFAFIKDPDGYWIEIFDLKGIRQIVNSLA	73.12	9e-100	gi|255565419|ref|XP_002523700.1|	lactoylglutathione lyase, putative [Ricinus communis]	mll0167
552	CotAD_35122	21034.4	0.645	1|1|1	4|4|2	1.24	0.018	0.460|0.001|0.009	CotAD_35122	MASSDLKESAANNPGLHTTPDEATKDYIMQQTMFRIKDPKASLDFYSRVLGMSLLKRVDVPELKFTLYFMGYEDVSKASSDPYGRTLWTFGRAATIELTHNWGTESDPEFKGYHTGNSEPRGFGHIGITVDDVNKACERFERLGVEFVKKLDAGKMKGIAFIKDPDGYWIEIFDLKTIGDVISRCS	79.89	3e-109	gi|462401479|gb|EMJ07036.1|	hypothetical protein PRUPE_ppa011023mg [Prunus persica]	CC1315
557	CotAD_31752	49080.1	0.175	2|3|3	6|3|10	1.72	0.013	0.001|0.008|0.001	CotAD_31752	MATFFFFLLSFLICFHFSSAEPFIGVNYGQVADNLPPPSATAKLLKSTSIEKVRLYGADPAIIKALANTEIGIVIGAANGDIPSLASDPNSAAQWINSNVLPFYPASKIILITVGNEVLTTNDPNLINQLLPAMQNMQNAINAASLGGKIKVSTVHSMAVLGQSDPPSSGLFRPSYQPALKGLLQFHKDNGSPFAINPYPFFAYQSDSRPETVAFCLFQPNAGRFDSGNGLKYLNTFDAQVDSVHSALSAMGFKDVEIMVAETGWPYSGDSNEVGPSIENAKAYNGNLIAHLKSMVGTPLMPGKSVDTYLFALYDEDLKPGPGSERAFGLYKSDLSMTYDVGISKSSQTPPTPKTPVTPQPKPTATGWCVPKAGISDAQLQSSLDYACGQGIDCSPIQP…	80.55	0	gi|255536825|ref|XP_002509479.1|	Glucan endo-1,3-beta-glucosidase precursor, putative [Ricinus communis]	-
570	CotAD_12300	17704.3	0.409	2|2|2	3|4|6	1.31	0.037	0.039|0.512|0.028	CotAD_12300	MNVERLQKMAGAVRTGGKGSMRRKKKAVHKTTTTDDKRLQSTLKRIGVNAIPAIEEVNIFKDDAVIQFLNPKVQASIAANTWVVSGSPQTKKLQDILPGIINQLGPDNLDNLRKLAEQFQKQAPAATGIGTGVTTTQEEEDEEVPDLVPGETFEAAAEEGEAVI	86.27	6e-86	gi|388493890|gb|AFK35011.1|	unknown [Lotus japonicus]	-
576	CotAD_72722	56869.7	0.451	2|2|2	19|13|13	2.42	0.008	0.001|0.001|0.001	CotAD_72722	MAANGFVGDERKVQKNYWIEHSVDLTVEAMMLDSKAADIDKEERPEVLSLLPPYEGKTILELGAGIGRFTGDLAKKAGHVIALDFIENVIKKNETINGHYKNVKFLCADVTSPDLAFTEGSLDLIFSNWLLMYLSDKEVENLAERMLKWLKVGGHIFFRESCFHQSGDCKRKNNPTHYREPRFYTKVFKECQATDDSGNSFELSLVGCKCIGAYVKNKKNQNQICWIFQKVVSDNDKGFQRFLDSVQYKSNSILRYERVFGPGYVSTGGIETTKEFVGKLDLKPGQKVLDVGCGIGGGDIYMAEEFDVHVVGNDLSVNMISFALERATGLKCSVEFEVADCTKKVYPDNSFDVIYSRDTILHIHDKPALFRSFYKWLKPGGKLLISDYCKSSKTPSREF…	98.95	0	gi|159895667|gb|ABX10444.1|	phosphoethanolamine N-methyltransferase [Gossypium hirsutum]	ECs2370
577	Cotton_D_gene_10029057	31418.2	0.018	-|1|-	-|1|-	10	-	-|0.016|-	Cotton_D_gene_10029057	MTNFCPVTLDICALLLQAATFHPTVSSKGDKAGIFDLLHCRYRKARSAIFNLLYYNPGRQGWYLRSASLSVQEGKICYLQPAPLRPREARLVSSICFTVSTRRQDLLSSTCSTTTQRSKASIFDLLHYRYRKARSVIFKLPTTTQGGKASIFDLLRCRCRKARSAIFNLLHYNPGREGWYLRSASLSMQESKIYYLQPAPLQPREARLVSSICFAVSAGRQDLLFLTCSAITQGSKVGVFDLLRCRCRKARSVILTDLLSGEHDLYNEPNYA	37.29	1e-18	gi|315307496|gb|ADU04155.1|	hypothetical protein [Gossypium hirsutum]	-
579	CotAD_56905	19439.1	0.541	4|5|5	23|31|31	3.01	0.034	0.001|0.001|0.001	CotAD_56905	MLKQFSLVFFVLFACYVGVNSRELKHITKELEVNAPACEAWELYRNLGLINLVVRKLPNVQNTQVLEGDGGVGTVVKTTFVPGNSSYTEEFTVIDDQKRVKAAKGLEGDCLAFGCSVLIVEFDIIEKSQNSCIIKSIVSYAIKKEFEAKDPKPTVQIEAITQASKEYLERNN	45.53	3e-20	gi|460389998|ref|XP_004240631.1|	PREDICTED: S-norcoclaurine synthase-like [Solanum lycopersicum]	-
584	Cotton_D_gene_10009678	16535	0.205	2|2|-	3|3|-	1.51	-	0.611|0.035|-	Cotton_D_gene_10009678	ADVEGDVAAPGVPKKRTFKKFSFRGVDLDALLDMSTDELVKLFPARARRRFQRGLKRKPMALIKKREAPPGEKPEPVRTHLRNMIIVPEMIGSIIGVYNGKTFNQVEIKPEMISHYLAEFSISYKPVKHRRPGIGATHSSRFIPLK	94.7	8e-98	gi|470104079|ref|XP_004288442.1|	PREDICTED: 40S ribosomal protein S15-like isoform 1 [Fragaria vesca subsp. vesca]	DR0315
595	CotAD_32364	13454.3	0.445	3|4|3	3|4|3	1.7	0.002	0.200|0.007|0.025	CotAD_32364	MQQKSGFLILFLSLIFLPLIFSDARKEAPLGGWRPIKDTKDPHVMEIAEFAVEEYNKQSNGSLKLDKVVKGETQVVAGTNYRLILQAKKGAVDNTYQAVVWEKLWLNLRNLTSFNLVKG	63.83	2e-37	gi|359495539|ref|XP_003635016.1|	PREDICTED: cysteine proteinase inhibitor 1-like [Vitis vinifera]	-
596	CotAD_06202	51630.3	0.243	2|2|3	8|6|9	1.27	0.004	0.273|0.148|0.001	CotAD_06202	MAAHLESKEEKASEAFLRKYRLHGNLGESEDIDIVALKNYMDAQYFGEIGIGTPTQNFTVIFDTGSSNLWVPSSKCYFSIACYFHRKYKSSRSRTYKANGKPADIQYGTGAISGFFSEDHVTVGDLVVKHQEFIEATKESSLTFLIAKFDGILGLGFKEISVGNAVPVWYNMVNQGLVNEPVFSFWLNRNPEDDVGGEVVFGGMDPKHYKGEHTYVPVTQKGYWQFDMGDVLIGDQTTGLCASGCSAIVDSGTSLLTGPTAIIAQVNLAIGATGVVSQECKTVVSEYGETIIDLLLSKDQPLKVCSQIGLCSFDGTRDVSMGIESVVNENAGKASGNVHDAMCSVCEMAVIWVQSQLKQNQTQERILDYVNELCDRLPSPMGESVVDCNSLSSMPSVAF…	84.65	0	gi|21616051|emb|CAC86003.1|	aspartic proteinase [Theobroma cacao]	-
597	CotAD_42718	27827.4	0.328	5|6|5	32|39|23	1.26	0.001	0.001|0.001|0.003	CotAD_42718	MTLRGWFCXAERDALLANEATKRWTSSNQVLMEIACTRSANQLLHARQAYHARYKKSLEEDVAHHTTGDFRKLLLPLVSSYRYEGEEVNMNLAKTEAKLLHEKISDKAYSDDDVIRVLATRSKAQINATLNHYKNEYGNDINKDLKADPKDEFLALLRSTVKCLVYPEKYFEKVLRLAINRRGTDEGALTRVVCTRAEVDLKIIADEYQRRNSVPLTRAIVKDTHGDYEKLLLVLAGHVEN	100	7e-169	gi|3493172|gb|AAC33305.1|	fiber annexin [Gossypium hirsutum]	-
600	Cotton_D_gene_10012877	80912.5	0.198	5|5|7	8|8|16	2.03	0.007	0.002|0.001|0.001	Cotton_D_gene_10012877	MLFMLWLLFSSWVFSLVSATVSYDSKAIIINGRRRILLSGSIHYPRSTPEMWPDLIAKAKEGGLDVIQTYVFWNGHEPSPGKYYFEDRYDLVRFVKLVQQAGLYVNLRIGPYVCAEWNFGGFPVWLKYVPGIAFRTDNGPFKAAMQKFTAKIVNMMKAEKLFQTQGGPIIMAQIENEFGPVEWEIGAPGKSYTKWAAQMAVGLRTGVPWIMCKQDDAPDPVINTCNGFYCENFTPNAKYKPKMWTENWTGWFTEFGGAVPTRPAEDIAFSVARFIQNGGSFVNYYMYHGGTNFGRTAGGPFIATSYDYDAPIDEYGLTREPKWGHLRDLHKAIKSSEAALVSAYPTVTSLGSKQEAHVFKSKSGACAAFLANYDTRYSVKVKFGNGQYDLPRWSISILP…	80.97	0	gi|224087947|ref|XP_002308268.1|	predicted protein [Populus trichocarpa]	PAB1349
613	CotAD_66230	78741.5	0.281	3|3|3	89|83|72	1.31	0.001	0.001|0.001|0.001	CotAD_66230	MDISAMPKAFSNQHTWYLATLSSVSAKSKAETNPTISFSKLIYTYNHVIQGFSASLTPAELESLKNSPGYVSSVKDRVVKVDTTHSFEFLGLNSGTGAWPVSSFGKDVIVGVIDTGVWPESESFNDNGMSDVPSRWKGECESGTQFNSSLCNKKLIGARFFNKGLIAHISNITISMNSTRDTEGHGTHTSTTVAGTYVKDASYFGYAPGTARGMAPMARVAMYKALWEEGAYTTDIIAAIDQAITDGVDVLSMSLGLDGVELYEDPIAIATFAAIEKNIFVSTSAGNEGPDVETLHNGTPWVITVAAGTMDRDFGATLLLGNKVSINGLAQYPGNFTSTEFPIVFMDTCSNKTELSKIKQKIIVCQDPGKEDSLNDQFNNIQAAGNIAAVFITNSSSVD…	64.51	0	gi|462418894|gb|EMJ23157.1|	hypothetical protein PRUPE_ppa001770mg [Prunus persica]	slr0535
617	Cotton_D_gene_10032750	21314.2	0.063	-|2|1	-|2|9	1.73	-	-|0.223|0.001	Cotton_D_gene_10032750	MSTPRCGIQDIFNDSDDDVKFSMIANYSFFNGMPRWNKRQLTYMFRSSAFVISDQQFRPITTSALNKWAAVSSFTFREANPSDIVMGFHRRSHGDNVPFDGPGNVLAHAFAPRDGRLHYDADENWSTSNAIRQNQFDLESVAIHEIGHILGLGHSEDPNAIMYAYFSPGTIKRNLGGDDIDGIRALYSN	53.3	2e-66	gi|224162231|ref|XP_002338425.1|	predicted protein [Populus trichocarpa]	-
625	Cotton_D_gene_10037054	50117.1	0.131	4|4|3	11|7|12	1.69	0.009	0.001|0.002|0.001	Cotton_D_gene_10037054	MAWNGEQLQRATTLSTAIRSKSLLFCPPLFAAPQPKPVGSGTNYGTELNKKSSLRVVHKHGPCSQLHRQDKANIPTDAEILRQDEARVKSIHLKLARSSGSSNVDQIDATNLPAKDGSVVGSGNYVVTVGLGTPKKDLTLIFDTGSDITWTQCQPCAGSCYQQLDPVFAPSQSSTYSNISCNSTTCNSLASATGIKPRCSSACVYGIQYGDMSFSIGFFAKETLTLTSSDVFKDFLFGCGQNNQGLFRGAAGLIGLGRDKLSLPSQTALKYKGVFSYCLPSSASSTGFLSFGDTGASKSVKFITLSTVSQRSAFYGIDITGISVGGQKLSIAASVFTAGSAIIDSGTVITRLPPTAYAALSSEFKKQMSQYPMAPASKLLDTCYDFTKYSSVNVPKISF…	60.91	3e-175	gi|22326716|ref|NP_196638.2|	aspartyl protease family protein [Arabidopsis thaliana]	-
635	CotAD_06928	47200.1	0.09	-|-|1	-|-|1	1.36	-	-|-|0.003	CotAD_06928	MKLLWVWVVLPFAFAQLVTAFFDFNETELSLIESLEYGVSKINYNPLMVGLTLIHTAGAKGAVCLDGTLPGYHWHRGYGSGANSWLIQLEGGGWCNNIRTCVYRKKTRRGSSTYMEKQIPFTGILSEKAEENPDFFNWNRVKLRYCDGASFTGDSENKGAQLQFRGQRIWLAGMEDLMSKGMRYANQALLSGCSAGGLAAILHCDEFRDLFPRTTRVKCLSDAGLFLDAVDVSGGHTIRSLYSGVVGLQGVQHNLPRICTNHLDPTSCFFPQNVINHIRTPLFILNAAYDSWQIQSSIAPPSADPHGYWHDCRLNHAKCSASQLRYLQGFRTQMINAIKGFSMSRQNGLFINSCFANCQSERQDTWFDDNSPEIRNKPIAIAVGDWYFDRTAVKVVDCP…	77.46	0	gi|356571042|ref|XP_003553690.1|	PREDICTED: uncharacterized protein LOC100788448 [Glycine max]	-
641	Cotton_D_gene_10039140	14236.2	0.385	1|2|2	12|12|9	1.11	0.006	0.662|0.038|0.237	Cotton_D_gene_10039140	MASKLQQLQSKACQASKFVAKNGTAYYKQLLEQNKQYIQEPPTVEKCNELSKQLFYTRLASIPGRNEAFWKELDYVKNLWKNRQELKVEDAGIAALFGLECFAWFCAGEIVGRGFTFTGYYP	93.44	4e-82	gi|255546205|ref|XP_002514162.1|	hydrogen-transporting ATP synthase, rotational mechanism, putative [Ricinus communis]	-
672	Cotton_D_gene_10016809	49365.5	0.153	4|4|4	7|7|6	2.26	0.25	0.008|0.006|0.159	Cotton_D_gene_10016809	MAETQSRGLVFAGKKRGTGTDDFDGDDIFVAKKSMLPTMATESDPAAALANARHEFGEHGGVNMSIEASATFTVMEPETMRRMFAGELGPDRDFFIYSRHFNPTVLNLGRLMAALEGTEAAYCTASGMSAISSVLLQLCSSGGHVVASRTLYGGTHALLTHFFPRACNITTTFVDIGDLEAVKNAIVEGKTKVLYFESMSNPTLTVANIPALSRIGHEKGTTVVVDNTFAPMVLSPARLGADVVLHSISKFISGGADVIAGAVCGPASLVNSMMDLHQGALMLLGPTMNAKVAFELSERIPHLGLRMKEHCRRAMEYAIRMKKLGLKVIYPGLEDHPQHELLKSMANKEYGYGGLLCVDMETEERANRLMHHLQNYTQFGFMAVSLGYYETLMSCSGSS…	85.01	0	gi|255555749|ref|XP_002518910.1|	cystathionine gamma-synthase, putative [Ricinus communis]	SMc02217
686	CotAD_67379	21437.9	0.158	3|1|-	8|4|-	2.05	-	0.001|0.003|-	CotAD_67379	MQTRGASWAVPTGRRDGTVSQASDAANLPGFRDSVDVQKQKFAAKGLNTQDLVTLVGGHTIGTTACQFFRYRLYNFTTTGNGADPSITAAFVSQLQALCPQNGDGSRRIGLDTGSVNRFDNSFFANLRDGKGILESDQRLWTDASTKTFVQRFLGIRGLLGLTFNIEFGRSMVKMSNIEVKTGTVGEIRKVCSKVN	98.97	8e-139	gi|19698452|gb|AAL93154.1|AF485268_1	bacterial-induced class III peroxidase [Gossypium hirsutum]	-
704	Cotton_D_gene_10022303	47958.1	0.326	2|2|2	22|20|17	1.34	0.011	0.001|0.001|0.001	Cotton_D_gene_10022303	MASHKRFPNFVSLILLSLVAIASAEVFFEERFEDGWESRWVKSDWKKDENMAGEWNYTSGKWNGDPNDKGIQTSEDYRFYAISAEFPEVNNKGKTLVFQFSVKHEQKLDCGGGYMKLLSGDVDQKKFGGDTPYSIMFGPDICGYSTKKVHAILTYNGTNHLIKKEVPCETDQLTHVYTFILRPDATYSILIDNVEKQTGSLYTDWDILPPKKIKDPEAKKPEDWDDKEYIPDPEDKKPEGYDDIPKEIPDPDAKKPEDWDDEEDGEWTPSTIPNPEYKGPWKPKKIKNPNYKGKWKAPIIDNPDFKDDPDLYVFPNLKYVGIELWQVKSGTMFDNILVADDVEYAKKLAEETWGKQKDAEKAAFEEAEKKREEEESKDAPVDSDAEDEDGADDTEGHES…	90.73	0	gi|233955399|gb|ACQ91203.1|	calreticulin [Carica papaya]	-
724	CotAD_64167	34368.1	0.131	-|5|-	-|5|-	1.41	-	-|0.042|-	CotAD_64167	MGVKSFVEGGIASIVAGCSTHPLDLIKVRMQLQGESHVPNPAVQTLRPALAFQTTTTTTSSAIHMPPPPARVGPVATGIKIFRTEGVAALFSGVSATVLRQTLYSTTRMGLYDILKQKWTDKETKTMPLSRKITAGLIAGGIGAAVGNPADVAMVRMQADGRLPVSQRRNYTSVVDAITRMTKQEGVTSLWRGSSLTVNRAMLVTASQLASYDQIKEMILENGLMKDGLGTHVAASFSAGFVAAVASNPVDVIKTRVMNMKVEAGQKPPYAGALDCAIKTVKSEGPMALYKGFIPTISRQGPFTVVLFVTLEQVRKLLKDF	86.02	4e-172	gi|255579712|ref|XP_002530695.1|	mitochondrial dicarboxylate carrier protein, putative [Ricinus communis]	-
740	CotAD_40314	36811.3	0.176	4|4|3	53|74|41	2.53	0.002	0.001|0.001|0.001	CotAD_40314	MSFLQALSIFLLLLLYVVVGSAEQCGRQAGGALCPGGLCCSQFGWCGSTADYCTVPGCQSQCSGSGPAPGPGGLTNLISRETFNQMLLHRNDGACPARGFYTYDAFIAAARSFPAFATTGDQATRKREIAAFLAQTSHETTGGAGWAAPDGPYAWGYCYNRELNPPSSYCASGPNYPCSPGKQYFGRGPMQLSLRFGSKLPLCSWNYNYGQCGRAIGVDLLNNPDLLSSDPTISFKSAFWFWMTPQSPKPSCHNVIIGAWSPSSSDRAAGRVPGYGVITNIINGGLECGKGWNAQVEDRIGFYKRYCDILGVSYGNNLDCYNQSPFGNGVSVDSM	96.12	0	gi|3334147|sp|Q39799.1|CHI1_GOSHI	RecName: Full=Endochitinase 1; Flags: Precursor	VC0769
744	CotAD_48104	40819.6	0.229	4|-|2	17|-|8	1.23	-	0.001|-|0.516	CotAD_48104	MLVPAQKVGSIIGRKGEFIKKIVEETRARIKILDGPPGTTERAVMVSGKEEPDSSLPPAMDGLLRVHKRLIDGLEGDSSHAPSAVGTKVSTRLLVPAPQAGSLIGKQGTTVKTIQESSNCIVRVLGSEDLPVFALQDDRIVEVVGEAADVHKALELIASHLRKFLVDRSIIPLFEMHMQKSNPQMDHMPPRQTWAPPQGVPPNAGGGGFGHNPQYMPPPRQLENYYPPADMPPMDKQPHQGISAYGREAPTGAHGSSNPNAPSMITQVTQQMQIPLSYADAVIGTAGASISYIRRVSGATVTIQETRGVPGEMTVEISGTASQVQTAQQLIQNFMAEAAAPAQAQVGGAADQAYNPYAAHGSLYASPPSNPGHAGGYGYGSNYGY	86.1	0	gi|255561873|ref|XP_002521945.1|	Poly(rC)-binding protein, putative [Ricinus communis]	-
763	CotAD_22192	34081.8	0.024	-|1|1	-|2|3	2.38	-	-|0.144|0.001	CotAD_22192	MGWHELLWVGRLLVLMQLLHGVFGWGKDGHFAVCKIAEEYLTKDALATVKELLPDSAGGELASVCSWADDVRWHYHWSSPLHYVDTPDFKCNYKYCRDCHDAAGHKDHCVTGAIFNYTKQLFSAYQGYSPQLSYNLTEALMFLAHFIGDVHQPLHVGFLGDLGGNTITVRWYRRKTNLHHVWDTMIIDSAVKTLYGSDLATMIQAIQRNITDAWSNDVSSWENCGHNQTVCPNLYASESVRMACKFAYRNATPGSTLEDEYFLSRLPIVEKRLAQGGIRLAAVLNRLFNSEVKIAQA	76.29	2e-172	gi|255560824|ref|XP_002521425.1|	Nuclease PA3, putative [Ricinus communis]	-
774	CotAD_06244	39786.3	0.254	1|1|4	2|1|6	1.51	0.075	0.081|0.782|0.013	CotAD_06244	MGIFSFNAIALAFLLAIISGAVNACPPSDREALLALSSSLKEPYLGIFDSWKGTDCCSNWYGISCDPTTHRVTDVSLRGESEDPILQKTGHSSSGYMTGTINPSICQLDRLTTLIIADWKGIAGEIPSCLASLPNLRVLDLIGNSLSGKIPDQIGNLQKLTVLNLADNKINGEIPSSIVQLSSLKHLDLSNNLLTGEVPANFGNLKMLSRALLSGNQLTGTIPISISNMYRLADLDISRNKIQGQIPAQLGKMKVLATLDLGSNMLTGEVPPAVLGSTGLGILNLSRNSLEGNIPDVFGPKSYFMALDLSFNNLKGPVPGSLSSAKFVGHLDLSHNHLCGTIPVGTPCDHLEASSFDSNDCLCGNPLKTC	98.29	0	gi|134035512|gb|ABO47744.1|	polygalacturonase-inhibiting protein [Gossypium hirsutum]	ECU09g0030
779	Cotton_D_gene_10023424	27554.2	0.211	-|4|3	-|15|16	1.35	-	-|0.002|0.001	Cotton_D_gene_10023424	MSSSRVASFVYLLALTFIVQTAFGADPLFHFCSNSGNFSAYDPYEANLKELTGYLSIQAPPKGFGLGSIGQKPNQAYGLALCRGDVSTPDCKTCVVEAGSEIRKRCPYNKGAIIWYDNCLFKYSNMEFFGQIDNRNRFYMWNLNNVSEPQSFNAKTKELLSELANQAYSNPKMYAVGETELYGSNKLYGLTQCTRDLSSTECKKCLDGIIEELPTCCDGKEGGRVVGGSCNFRYEIYPFVNA	74.79	3e-132	gi|224093230|ref|XP_002309844.1|	predicted protein [Populus trichocarpa]	-
782	Cotton_D_gene_10006299	50445.6	0.108	1|1|3	2|1|3	2.56	0.676	0.002|0.049|0.043	Cotton_D_gene_10006299	MFKQRFVAPKSMASKSELEVVVMTTKVFSYVSHVPFVVIDLVHFKSVEVDVENEEVWVQSGAIVGEVYYRINERSTKLTFPGAFGYTVGMGGFISGGGDGLLSRKYGLAADNVIDAQFVDASGRVLDRRSMGEDLFWAIRGGGGGSFGIVLSWKIKLVHVPSIVTVFSVGRTLEQNATQLLHRWQYVAPNLPNDVYSLVAISAWKASENETRTVLVTFSSVFQGGANELIPLMQERFPELGLVKEDFIEMTWTESVLFINGLSNETSEALLERNRSLLPPSFKSKSDYVNEPVPEIALQGLWPQLLEVDEAISAHQTFIAYGGMMDEISETETPFPHRKGTLYKIHYNIGWQEEENIRSQRYISWMRKLYSYMGPFVSKSPRAAYVNYRDLDIGRNNDD…	57.89	1e-160	gi|224122382|ref|XP_002330609.1|	predicted protein [Populus trichocarpa]	RSc0050
792	CotAD_25120	33755.4	0.149	4|3|-	7|4|-	1.21	-	0.036|0.438|-	CotAD_25120	MSSSGVVRRGIHYLQKLKAANIPSDLIEKGQNRVIDASLTLIRERAKLKGELVRALGGALASTSLLGVPLGHNSSFLQGPAFAPPRIREAIWCGSTNSATEEGKELNDPRVLTDVGDVPVQEIRDCGVDDDRLMSAISESVKLVMEEDPLRPLVLGGDHSISFPVYSHASSFARIMEGGYARRLLQVGIRSITTEGREQGKRFGVEQYEMRTFSKDCHFLENLKLGEGVKGVYISVDVDCLDPAFAPGVSHIEPGGLSFRDVLNILHNLEGNLVAADVVEFNPQRDTVDGMTAMVAAKLVRELAAKMSK	84.08	0	gi|255541244|ref|XP_002511686.1|	arginase, putative [Ricinus communis]	SPAPB24D3.03
816	CotAD_26231	55342.3	0.392	10|9|6	65|48|40	1.45	0	0.001|0.001|0.001	CotAD_26231	MKSLLFQLILASFVLSNFDNNVNAGHTSVFVRKEWPSEDIPLDHEVFAVPTGHNAPQQVHITQGDYDGKAVIISWVTPDEPGSSKVQYGTLKGKYEFTAEGKMTNYTFYKYNSGYIHHVLVDGLEYDTKFYYKIGTGDSAREFWFQTPPKIGPDVPYKFGIIGDLGQTYNSLSTLEHYMQSGAQTVLFVGDLSYADRYQYNDVGIRWDSWGRFVEKSTAYHPWIWSAGNHEIEYMPYMDEVVPFKSYLQRYPTPHLSCKSSNPMWYAIRRASAHIIVLSSYSPFVKYTPQYEWLSEELKKVDREKTPWLIVLMHMPIYNSNEAHFMEGESMRAVFEEWFVHHKVDVIFAGHVHAYERSYRISNIRYNVSSGERYPVPDKSAPVYITVGDGGNQEGLAGR…	86.96	0	gi|357601492|gb|AET86956.1|	PAP26 [Gossypium hirsutum]	MT2654
830	Cotton_D_gene_10009124	21822.7	0.186	1|1|1	8|8|9	1.56	0.02	0.002|0.001|0.001	Cotton_D_gene_10009124	MASTDKTAVPLSSPKSEATPPSAVAAAAKSPFNYSFVDVALRVLLFAATLTSVVVMATSKETELVPVPGFPLIRIQLQAKFNHSPALVYFIAALSVTGFYSIITALASLSIVLNPTYSKTFLLFFAFFDVVFVGIVASATGAAGAVGYIGLKGNTHVGWTKICNVYDKFCRYTASSLALSLFAAILLVLLSMISTFTLYKKIRD	54.68	3e-47	gi|238055376|sp|B9RT03.1|CSPL5_RICCO	RecName: Full=CASP-like protein RCOM_0679870	-
831	CotAD_50103	19073.3	0.103	1|1|1	2|4|1	1.4	0.026	0.416|0.044|0.164	CotAD_50103	MSNPKVFFDILIGKAKAGRVVMELFADVVPKTAENFRALCTGEKGVGQCGKPLHYKGSAFHRIIPSFMCQGGDFTRGNGTGGESIYGMKFADENFNLKHTGPGCLSMANAGPNTNGSQFFICTEKTPWLDGKHVVFGKVVDGYSVVKEMEKVGSESGRTLQPVVVEDCGQVEEN	100	2e-116	gi|353681902|gb|AER12108.1|	CYP [Gossypium hirsutum]	DR0237
834	CotAD_29125	25356.3	0.197	1|4|3	3|14|17	1.68	0.068	0.406|0.001|0.001	CotAD_29125	MGSASATILQRWILDFHKLIFCPKCTANQTLNTNQLVVSVPISRRSAILLSSVPTLTLIPLPHFSEAGARERRNKKTIPIEDYLTTPEGLKYYDIVKGKGPVAEKGSTVQVHFDCIYRGITAVSSRESKLLAGNRIIAQPYEFKVGATPGKERKREYVDNPNGLFSAQAAPKPPPAMYYITEGMKVGGKRTVIVHPEAGYGQKGMNEIPPGAEFELNIELLQVMPPPEN	76.84	9e-103	gi|460385517|ref|XP_004238450.1|	PREDICTED: peptidyl-prolyl cis-trans isomerase FKBP18, chloroplastic-like [Solanum lycopersicum]	-
840	CotAD_05754	46362.4	0.14	2|4|1	5|6|2	1.16	0.011	0.135|0.871|0.046	CotAD_05754	MALKSFIHVHPDSHFPIQNLPYGAFKTHSTTLPRLGVAIGDYVLDLSEIAKSGLFNSPLLAGSDCFLQPTLNKFLAMGRPAWKEARDTLQKLLSSTEPALRDNMELRQKALVPMSEVEMVLPMEIGDYTDFFSSMHHAKNCGTIFIGPKNPISPNWFRLPIAYHGRASSVVISGTDIIRPRGQGHPTGNSTPYFGPSLKLDFELEMATIVGPGNELGKTIDVNEAADHIFGVVLMNDWSARDIQAWEYVPLGPFLGKSFGTTISPWIVTLDALQPFACDAPKQDPPPLPYLAEKISKNYDIALEVQIKPSGQKDSSVVTRSNLKNLYWTLTQQLAHHTINGCNLRPGDLLGTGTISGPEPDSLGCLLELTWNGQKSLLLNGTTRKFLEDGDEVIFTGCC…	82.97	0	gi|255559084|ref|XP_002520564.1|	fumarylacetoacetate hydrolase, putative [Ricinus communis]	lin2367
850	CotAD_51173	38127.5	0.302	8|7|1	23|30|19	1.61	0.018	0.001|0.001|0.001	CotAD_51173	MADAIMHSTMLLLLSGLLLAIFKTADAQVGVCYGMMGNNLPPAAEVIDIYRRKGIQQSRLYAPNEAALRALGGTNIRLLLDVSNPRLEFLAASQANADRWVQDNVRRYSTVNFRYIAVGNEVKPWDPFARFLFPAMQNVHNAIVKAGLGNRIKVSTATFFGAMEVSFPPSQGKLRGDYQQLLGPVITFLRNNRAPLLVNVYPYFSHMENPRDVRLDYALFTAPSVVVTDGPYRYQNLFDAMLDAFYAALERVGGGSLDIVVSESGWPSAGGTATSVNNARTYNTNLVRHVNQRKGTPRKPGKAIEVYLFAMFDENNKEPAYEKHWGLFFPNKQEKYPISFN	73.39	1e-178	gi|1770305|emb|CAA92278.1|	1,3-beta-glucanase [Gossypium hirsutum]	-
851	CotAD_59784	45129.1	0.372	3|1|2	7|2|2	2.18	0.331	0.014|0.010|0.656	CotAD_59784	MNALAATNRNFRLASRLLGLDSKLEKSLLIPFREIKVECTIPKDDGTLATYVGFRIQHDNARGPMKGGIRYHPEVEPDEVNALAQLMTWKTAVAAIPYGGAKGGIGCNPRDLSKSELERLTRVFTQKIHDLIGIHTDVPAPDMGTNAQTMAWILDEYSKFHGHSPAVVTGKPIDLGGSLGREAATGRGVVYATEALLAEYEKSIKGMTFVIQGFGNVGSWASRLIHEKGGKVIAVSDITGALKNPNGIDIPELLKHKEATGSLKSFNGGDSMDPNELLVHECDVLIPCALGGVLNRENAADVKAKFIIEAANHPTDPEADEILSKKGVIILPDIYANAGGVTVSYFEWVQNIQGFMWDEEKVNQELKKYMTKAFHNIKNMCQSHDCNLRMGAFTLGVNR…	89.54	0	gi|224134280|ref|XP_002321781.1|	predicted protein [Populus trichocarpa]	SSO1907
882	CotAD_33997	21816.7	0.25	1|1|1	5|8|9	1.23	0.028	0.033|0.206|0.390	CotAD_33997	MASTDKTAVPLSSPKSEAPPPSAVAAAAKSPVNYSFVDVVLRVLLFAATLTSVVVMATSKETEMVPVPGFPLIRIQLQAKFNHSPALVYFIAALSVTGFYSIITALASLSIVLNPTYSKTFLLFFAFFDVVFVGIVASATGAAGAVGYIGLKGNTHVGWTKICNVYDKFCRYTASSLALSLFAAILLVLLSMISTFTLYKKIRD	59.65	1e-45	gi|238055376|sp|B9RT03.1|CSPL5_RICCO	RecName: Full=CASP-like protein RCOM_0679870	-
883	CotAD_51330	10553.5	0.465	4|4|4	22|22|15	2.12	0.019	0.001|0.001|0.001	CotAD_51330	MSMKAHYVGRLENGKVFDSSYNRGKPLTFRVGVGEVIKGWDQGILGGDGVPPMLAGGKRTLRLPPELGYGVRGAGCKGGSCIIPPDSVLLFDVEFIGKA	92.78	6e-62	gi|462407896|gb|EMJ13230.1|	hypothetical protein PRUPE_ppa011219mg [Prunus persica]	YPO0195
884	CotAD_63571	21204.5	0.287	3|4|3	10|7|5	1.54	0.004	0.001|0.029|0.045	CotAD_63571	MVSASEIATKLNLASHPEGGFFSETFRDSSVMLSTSQLPPQYKVDRPVSTSIYFLLPAGSVSHLHRIPCAETWHFYLGEPLTVLELDEKDGQVKLTCLGPDLLNNQKVQYTVPPNVWFGAFPTKDFNISTDGAVTKNDPRDAESHYSLVGCTCAPAFQFQDFELAKRSELVTRFPKHEHLISLLTYPD	76.19	2e-105	gi|224069168|ref|XP_002326291.1|	predicted protein [Populus trichocarpa]	SA0625
892	Cotton_D_gene_10010967	41099.1	0.265	-|7|6	-|35|46	1.19	-	-|0.001|0.001	Cotton_D_gene_10010967	MATNLLLTPQPLAFSKFSVSTKKVAINSQRATRFVAKASGGEEKNDEKGFTPFGFVTDNPSSRSAIQLPESPAEDGNVGQMLYRIEDKGKDYGSYIKSGKLRWFVRETGSPESRRGTVVFLHGAPTQSYSYRVVMSQMSDAGFHCFAPDWIGFGFSDKPQPGYGFDYTEKEFHEALDKLLDVLEVKSPFFLVVQGFVVGSYGLTWALKNPSKISKLAILNTPLTVSSPVPGLFQQLRIPLFGEFTSQNAVIAERFIEAGSPYVLKLEKADVYRLPYLASSGPGFALLEAARKINFRDISSQIADGFASGRWDKPVLVAWGLADKYLPQTIAEEFRKQNLSSVELKLIEGAGHMPQEDWPEKVVDALRMFF	87.54	0	gi|224128476|ref|XP_002329013.1|	predicted protein [Populus trichocarpa]	Cgl0297
894	CotAD_71573	37331	0.259	1|3|4	1|9|13	1.36	0.004	0.002|0.016|0.001	CotAD_71573	MAGNLTTGGGKDLPGDMNRKSANTDSLVVCFGEFLIDFVPTVGGVSLAEAPAFQKAPGGAPANVAVCVSRLGGSSAFIGKVGDDEFGHMLANILKENYVDNTGMRFDQSARTALAFVTLRADGEREFLFFRHPSADMRLHESELDINLINKAKIFHYGSISLIEEPCKSAQLAAMNIAKKSGSILSYDPNLRLPLWPSAEAAREGIMSIWEQADLIKVSEDEITFLTEGGDPYDDNVVMNKLFHPNLKLLIVTEGSAGCRYYTKAFKGRVPGIKVKAVDTTGAGDAFVGGLLSSLASDLNLFQDEKGLREALAFANACGALTVTGRGAIPALPTKQAVVDALTKYNAS	78.72	0	gi|225455661|ref|XP_002263176.1|	PREDICTED: fructokinase-2 [Vitis vinifera]	BS_iolC
910	CotAD_10286	65835.8	0.197	2|1|2	2|3|7	1.3	0.009	0.673|0.201|0.038	CotAD_10286	MMSIPSPSHMGTPPHSENPHMDTTPPLDNPHDMGSSHIDIQQDLNSHMDTPPHTENPNDMGSPHIDIHQDLFPDYYGGTASAPAPASALDSAPSEPKLEFEGNDNHNGNNDSAPVIKDNNSPPPVPPGSSGEGLPYAPIHWPNAGDIWTWKVGRRVNSAGFYGDRFLHLPESLRKANSPKVFASKPALERFIRLNFPDADVNAFFASFVWKIPAVVESPTKVAAAPAAPAEGTEDDKQESDTKGLRRTQRKRAPPPPPFSTPSSIEAPAAPEEGTEDVKQESNSKTPRRTQRKRAPPAPPVSTPNSSDGKKMQKNSKGSAKTKRPTRQRGKESAPPPAETEDTNSGLDLSFLDNETGRAEFDNYLSSLDEILAQPFSEEPFSHPAEMQNSFAGDSEMAE…	49.68	6e-126	gi|224099813|ref|XP_002311630.1|	predicted protein [Populus trichocarpa]	-
917	Cotton_D_gene_10035845	38972.9	0.186	4|4|-	8|9|-	1.25	-	0.001|0.083|-	Cotton_D_gene_10035845	MALPRSKLLLLLFALSFAIVAIAGKSYYDILQVPKGASDEQIKRAYRKLALKYHPDKNPGNEEANKRFADINNAYEVLSDSEKRGIYDRYGEEGLKQHATSGGRGGMGVNIQDIFSSFFGGGSVEEEERIVKGDDVIVELDATLEDLYMGGTLKVWREKNILKPAPGKRRCNCRNEVYHKQIGPGMFQQMTEQVCEQCQNVKYEREGYFVTVDIEKGMQDGQEVVFYEDGEPIIDGEPGDLKFRIRTAPHDRFRREGNDLHTTVTITLVQALVGFDKTIKHLDDHLVEIGSKGITKPKEVRKFKGEGMPLHFSNKKGDLFVTYEVLFPTSLAEDQKAKIKSILG	90.34	0	gi|225437515|ref|XP_002275221.1|	PREDICTED: dnaJ homolog subfamily B member 11 [Vitis vinifera]	HP1332
924	Cotton_D_gene_10016666	47277	0.205	4|3|4	22|19|8	1.24	0.004	0.007|0.002|0.003	Cotton_D_gene_10016666	MKTQTFCLVFLFISVAQGLHSKCDTQDHGSTLQVFHIYSQCSPFKPSKPLSWEEDMLSMLAKDQARLQYLSSLVAGKSVVPVASGRQIVQSPTYIVRAKIGTPPQTMLMAMDTSNDAAWIPCNGCIGCSSKVFNTAKSTTFNTLGCHAAQCKQVPNPTCGGSACVFNMTYGSSSIAGNLSRDTVVLATDPIPSYTFGCLQKTTGKSVPQQGLLGLGRGPLSLLSQTQHLYKSTFSYCLPSFRSPNFSGSLRLGPKGQPIRIKYTQLLKNPRRPSLYFVNLIGIRVGRRVVDIPPKALAFNPSTGAGTIFDSGTVFTRLVEPAYVAVRNAFRRRVRVANVTSLGGFDTCYTVPIVAPTITFMFTGMNVTLPQENLLIHSTAGSITCLAMASAPDNVNSVL…	81.21	0	gi|255543963|ref|XP_002513044.1|	Aspartic proteinase nepenthesin-1 precursor, putative [Ricinus communis]	-
931	CotAD_11996	39852.3	0.267	-|4|5	-|16|23	1.21	-	-|0.001|0.035	CotAD_11996	MKSQICLAFGTLALLLASALADDVVVLTEANFDKEVGQDRGVLIEFYAPWCGHCKKLAPEYEKLGATFKKAKSVLIGKVDCDEHKSLCSKYGVQGYPTVQWFPKGSLEPKKYEGPRTAEALAEFVNTEGGTNVKIATLPSNVAVLNADNFDEIVLDETKDVLVEFYAPWCGHCKNLAPTYEKVATAFKSEEDVVIANLDADKYRDLAEKYGISGFPTLKFFPKGNKAGEDYDGGRDLDDFVSFINEKCGTSRDAKGQLTSTAGILSSLDALVKEFVAASADEKKVVFSKIEEEVEKLKGSTARHGKIYLKAAKSCLEKGADYPKKEIERLQRMLDKSISPAKADEFTLKKNILSTFASS	98.89	0	gi|341575453|gb|AEK80406.1|	protein disulfide isomerase [Gossypium hirsutum]	VC0306
949	CotAD_10209	19242	0.03	1|1|1	7|4|2	1.3	0.077	0.644|0.023|0.853	CotAD_10209	MIHYYGPTKIIIIRFLTASIIGAASIAATSYFRSKRNPVKDRHRSLLIPLQQRTGSGRLGNRERFSHYVARQLGFEDANECPKLCKLAENYLKKPKDCEVKIFEYFAEEPEADILYGKLVEEFERCILSYFAFHWSQAPNMISQVLGVESEKKTKLKDFVMAATR	66.39	1e-50	gi|470104083|ref|XP_004288444.1|	PREDICTED: uncharacterized protein LOC101300668 [Fragaria vesca subsp. vesca]	-
950	Cotton_D_gene_10012625	50051.1	0.293	11|9|10	96|67|86	1.32	0.002	0.001|0.001|0.001	Cotton_D_gene_10012625	MAFPLSSSITLSFTPSTPKRHFLSTHFAFRFSQARSQENARPFQLKVQCKASKEAFIKDKSQCRNIPTSFNLSNLINGTMKLENVIAVILILAEITSPLPLAGWDFWSISPANAVLYSPETKLPRTGELALRRAIPANTNMKAIQDSLEDISYLLRIPQRKPYGTMEGNVKKALKIAVDGKDSILASIPADLREKGSTLYSSLVDGKGGLEALLKSIKDQDPDRVSVGLASSLDTVAELELLQAPGLSFLLPEQYLKYPRLTGRAIVELTIEKGDGSSFSPEAGGELRKTATIQVVLDGYSAPLTTGNFAKLVTDGAYDGTKLSCINQAIISENDTGKNGYSVPLEIMPSGQFEPLYKTTLSVQDGELPVLPLSVYGAVAMAHSEVSEEYSSPYQFFFY…	79.65	0	gi|255578656|ref|XP_002530189.1|	peptidyl-prolyl cis-trans isomerase, putative [Ricinus communis]	all4287
954	CotAD_01708	27698	0.524	3|2|1	3|2|1	1.2	0.001	0.018|0.001|0.001	CotAD_01708	MTKCYPTVSEEYQKSVEKAKRKLRGLIAEKNCAPLMLRLAWHSAGTFDVKTKTGGPFGTMKHPAELAHAANNGLDIAVRLLEPIKEQFPNLTYADFYQLAGVVAVEITGGPEIPFHPGREDKPHPPPEGRLPDATKGSDHLRQVFSAQMGLSDQDIVALSGGHTLGRCHKERSGFEGPWTTNPLIFDNSYFKELLSGEKEGLLQLPTDKVLLSDPVFRPLVEKYAADEDAFFADYTEAHLKLSELGFADA	99.6	1e-159	gi|148912162|gb|ABR18607.1|	cytosolic ascorbate peroxidase 1 [Gossypium hirsutum]	XF2232
971	CotAD_53489	80844.9	0.02	-|-|1	-|-|1	4.69	-	-|-|0.042	CotAD_53489	MGLPQVSSDDSAEEGEAASRAAFLRSPPRFAGSSACDLDGMQKGSLGQTIGNSFCPSLGDFQTKTSLELSRFSDETFKHGGETNASSNVHGLKVGSASVVGPYATPKSAQKIQNAVSRIVGFESLGTSKLVEGISSDQVHSSSVLGVRDNETESGGSLVRKRLLSPLNSMLFSDQISSDPLDISYSSNQGNLSPLADKHRVPVLQDNKKANIGSQMKSTASSWSLPSCLGHGDIPYEKGGTASVFFTDGPLLGNKEPHLSCTFSYSPGVDQFQEPSLLRSQTGAISISSQMATSPPVTLSPLGPKFSERITAAGGWMNLKKEMDDCSSTLKDIEQSVERFDSGSIFAPEEEEFEITSRSFEDTSFLHKEFSTSLESSARLSWPLWQESAPTSPYKRFIK…	55.54	0	gi|255543633|ref|XP_002512879.1|	conserved hypothetical protein [Ricinus communis]	-
980	CotAD_52534	24563.3	0.268	2|3|3	29|31|42	3.97	1.325	0.001|0.001|0.001	CotAD_52534	MKTTKASVFLLFIIFSVTPSSFLFGVANATNEPVLDTDGNEVQTGTEYYVVSAIWGAGGGGLALGRPSGNPCPEVVAQRRSGDDGIPVIFSSSDSDDGVVRLSSDINIEFVPLRPRLCRTTTVWKVDDYDHSAGKWWVITDGVKGNPGADTLTSWFRIEKGGVLGYKFKYCPAVCGTCPALCNEIGRDSDGDMVRLALSTDNGWPFIFKKKESSLRGIQQVIRT	65.45	2e-93	gi|55139090|gb|AAV41233.1|	putative 21 kDa trypsin inhibitor [Theobroma bicolor]	-
995	CotAD_14200	113331	0.069	-|1|2	-|1|2	1.26	-	-|0.014|0.021	CotAD_14200	MAGQTQDQFEVYFKKADLDGDGRISGVEAVSFFQGAGLSKQVLAQIWAYADQSHSGFLSKQEFFNALKLVTVAQRRELTPDIVKAALYGPAAAKIPAPQINFPATTQMGGAVPPSSPSVGFRGPGVPNAGMSQQHFPSQQNLSMRPQQTMPAATALHPSQGIAAPEFSRGGNIVGQPQAMPAGSTPLSHQSMPTVATGPSLTNQNMSSNWLSGRPGGASTGPRGVAPSTAPRPQAAVSMSSQPTANDSKALAVSGNGLASGSAFGSDAFSATSFTPKQELSTQTFSPHSAPASPGITPVSSGAQPLVKSNSLDSLQSTFSMHSAGSQSQRPYSSPIQGQPVSSPSSSFTPSGISAGNVNAAPNSSQPPWPKMKQSDVQKYTKVFMEVDTDRDGKITGEQ…	60.97	0	gi|462406830|gb|EMJ12294.1|	hypothetical protein PRUPE_ppa000751mg [Prunus persica]	-
1010	CotAD_33025	24723.8	0.22	1|1|1	7|8|6	1.56	0.029	0.129|0.013|0.020	CotAD_33025	MNNNNTLLLLFCILSSSAVVYSDGNAKIFDITHKITSQLPTFNSQKGLGHFIWLVSSIKNGSMANESEFKLGTHTGTHVDAPSHFFQKYYEEGFDVSTLSLQTLTGPVLVVDVPRNKNITAEVMKSLNIPRGVHRVLFKTLNTERRLMHRREFASDFTGFKKDGAQWLVDNTDIKLVGIDYLSISAYVDAAPTHHILLKSRVRTKRFLMLIFSYMNKE	64.8	2e-87	gi|255555315|ref|XP_002518694.1|	conserved hypothetical protein [Ricinus communis]	MA3747
1019	CotAD_17975	80599	0.101	4|2|3	10|5|6	1.4	0.026	0.001|0.313|0.002	CotAD_17975	MAEEEAVAPAPSPVPSDLKRKLEDVEPHDPHADNMPRDSALDPDAQDNDAAPSDLSEAKRPRLDDDKTDGLASENGFEAEKSHEPDKEEEEGLQQNELNKQAENGDSPAKEAEETVKPEQYEGTAEETDGQSADNPETADAELGKVESFEADNGQEPAKEDNKQPSDDLPQQEVDDGTTITRKMEVPNAKVGVLIGKAGDTIRYLQYNSGAKIQIMRDADADRDAPTRPVEIIGTLSSIIKAEKLINAVIAEADAGGSPSLVARGLATTQAAGAADQIEIQVPNEKVGLIIGRGGETIKGLQTRSGARIQLIPQHLPEGDGSKERTVRVTGDKKQIEIAREMMKDVMNQTVRPSPLSGGFNQQGYRPRGNSGPPQWGPRGHPPQTSYDYQQRGPYPSHN…	61.77	0	gi|462418890|gb|EMJ23153.1|	hypothetical protein PRUPE_ppa001735mg [Prunus persica]	MK0513
1026	Cotton_D_gene_10002932	44835.8	0.161	-|2|3	-|3|6	1.23	-	-|0.439|0.018	Cotton_D_gene_10002932	MPLPSLSLLFLFTSLLIPSPISSSPVQDPELVVEDVHRAINASRRNLGYLSCGTGNPIDDCWRCDPNWEKNRQRLADCAIGFGKNAIGGRDGKIYVVTDSSDNDAVNPKPGTLRHAVIQDEPLWIIFARDMTIRLKEELIMNSFKTIDGRGASVHIAGGPCITIQYVTNIIIHGLNIHDCKQGGNAMVRDSPRHYGWRTISDGDGVSIFGGSHVWVDHNSLSNCNDGLVDAIHGSTAITISNNYMTHHDKVMLLGHSDSYTQDKNMQVTIAFNHFGEGLVQRMPRCRHGYFHVVNNDYTHWEMYAIGGSANPTINSQGNRFTAPNDRFSKEVTKHEDAPESDWKSWNWRSEGDLMVNGAFFTASGAGASSSYSKASSLGARPSSLVATITTNAGSLNCK…	96.04	0	gi|284504570|gb|ADB90475.1|	pectate lyase [Gossypium herbaceum]	BS_pelB
1035	CotAD_71595	58052.5	0.279	1|1|1	10|7|2	1.16	0.013	0.362|0.042|0.546	CotAD_71595	MAVSPNIRIGIPLPSTPYTYHRLPMSTLSYPFFFFYSSPPRALRFHSPPTRHRPPSLRPKASVETPAASGKLVENVVIIGSGPAGYTAAIYAARANLKPVVFEGYQVGGVPGGQLMTTTEVENFPGFPDGITGPDLMDRMRRQAERWGAELFQEDVEHIDVRINPFTIQSSEREVKCHSVIFATGATAKRLRLPREDEFWSRGISACAICDGASPLFKGQVLAVVGGGDTATEEAIYLTKYARHVHLLVRRDQLRASKAMQDRVYNNPNITLHFNTEAVDVVSNTKGQMSGILTRRIDTGEESVLEAKGLFYGIGHSPNSQLLQGQVELDSSGYVLVEEGTAKTSVEGVFAAGDVQDHEWRQAVTAAGSGCIAALSVERYLVRNDLLVEFHQPQTEEVK…	87.53	0	gi|225441864|ref|XP_002278551.1|	PREDICTED: NADPH-dependent thioredoxin reductase 3-like [Vitis vinifera]	NMB1324
1040	CotAD_42021	46747.4	0.195	5|4|5	72|50|37	1.4	0	0.001|0.001|0.001	CotAD_42021	MDFIATILFLALVISSTKALDPCGPQPDDSDLLVIPIYGKCSPFNPPKPDSSFNTVMNMASKDPARVKYLSSLVAQKTTAVPIASGQQVLNIGNYIVRVKIGTPGQLMFMVLDTSNDVAWVPCSGCNGCSATTFSPNTSSTYGSLDCGLPQCAQVHGLSCPATGSAACSFNQSYGGDSSFSANLVRDSLGLANDIVPDFAFGCINVISGGSVPPQGLLGLGRGPMSLISQSGALYSGVFSYCLPSFKSYYFSGSLKLGPVGQPKNIRTTPLLKSPHRPSLYYVNLTGISVGRVQVPIAPEYLAFNPNTGAGTIIDSGTVVTRFVQPIYKAIRDEFVKHVKGPFTAIGVFDTCFDATAEAEAPLITLHFEALSMPLPMENSFLHTSAGSRACLAIAPVPN…	73.97	0	gi|224067042|ref|XP_002302336.1|	predicted protein [Populus trichocarpa]	-
1044	CotAD_66777	49484.1	0.306	6|7|2	24|15|3	1.85	0.195	0.001|0.002|0.074	CotAD_66777	MEKAINRQQVLLQHLNPSASSFSSHQNNSALSASACLAGDSAAYQRTNVFGDDVVIVAAYRTALCKSKRGGFKDTYPDDLLAPVLRAVIEKTNLNPSEVGDIVVGTVLAPGSQRASECRMAAFYAGFPETVPVRTVNRQCSSGLQAVADVAAAIKAGFYEIGIGAGLESMTTNPMAWEGSVNPRVKQMEQAQNCLLPMGITSENVAHRFGVTRQEQDQAAVESHRKAAAATASGKFKDEIVPVATKIVDPKTGDEKPVTISVDDGIRANTSVSDLGKLKPVFKKNGTTTAGNSSQVSDGAGAVLLMKRSVAMRKGLPILGVFRTFAAVGVDPAIMGVGPAVAIPAAVKSAGLELDDVDLFEINEAFASQFVYCQKKLELDPQKINVNGGAMAIGHPLGV…	87.5	0	gi|147866537|emb|CAN81585.1|	hypothetical protein VITISV_023191 [Vitis vinifera]	BH2029
1046	CotAD_15166	58655.6	0.084	2|1|2	6|1|3	1.79	0.487	0.012|0.869|0.001	CotAD_15166	MAISLLFSLLFLNISISSAASNPTYQSLLQCLSQSINPSQNVSTILFSNTNPSYASVLQAYIRNARFNTSSTPKPVIIITPLEESHVSAAVICSQKVGFQLKIRSGGHDYEGLSYVSDKPFFVLDMFNLRSISIDMTDESAWVETGATLGELYYNIWEKSNVHGFPAGLCPTVGVGGHLSGAGYGTLMRKYGLSSDYIVDAKIVNVDGKILDRKAMGEDLFWAIRGGGAASFGVVLAYKVKLVRVPETVTVFRLERLLADNATDIALKWQSIAPTTDENLFTRMLLQPVTRNRQRTMRVTVNGLYLGNADGVAALLSKDFPELGLKNENCTEMRWIDSVLWWANFDAGTPPTALLDRNVNDADFLKRKSDYVQTPISKNGLESLWQKMVELGNVGLACN…	67.67	0	gi|255564321|ref|XP_002523157.1|	Reticuline oxidase precursor, putative [Ricinus communis]	MT1824
1057	CotAD_23959	39983.3	0.209	3|3|3	12|5|6	1.45	0.029	0.001|0.006|0.005	CotAD_23959	MEKSQVWLAFGAMALLLASATADDVVVLTEDIFEKEVGQDRGALVEFYAPWCGHCKKLAPEYEKLGSSFKKAKSVLIGKVDCDEHKSVCSKYGVQGYPTIQWFPKGSLEPKKYEGPRTAEALAEFVNTEGGTNVKIATLPSSVVVLNADNFDEVVLDETKDVLVEFYAPWCGHCKNLAPTYEKVALAFKMEEDVVIANLDADKHKDLAEKYGVSGYPTLKFFPKNNKAGEDYNGGRGLDDFVSFINEKCGTSRDGKGQLTSKAGILSSLDALVKDFVAANNDEKKTVFSKIEQEVEKLKGSSERYGKIYLKAAKSCLEKGADYPKKEIERLQRILDKSISPAKADEFTLKKNILSTFM	88.45	0	gi|341575453|gb|AEK80406.1|	protein disulfide isomerase [Gossypium hirsutum]	mll5082
1075	CotAD_16332	21951.3	0.251	-|-|4	-|-|11	1.25	-	-|-|0.037	CotAD_16332	MSRHPEVKWAQRTDKVFITVLLPDSKNAKVNLEPEGVFNFSATAGTDNNTYELKFDLFDKVNVEESKINIGVRSIFCILEKAEKVWWKKLLRGDGKAPHYVKVDWDKWVDEDEDKGLGDLDLGGMDFSNFGGMGGMGDMMGGMGDMMGGMGGMGGMDEFEDSDDEGQEVTKPDDKAEGDAKPEEHGIGSSEKKEAEPST	86	1e-58	gi|462396743|gb|EMJ02542.1|	hypothetical protein PRUPE_ppa011992mg [Prunus persica]	-
1083	CotAD_19316	79765.8	0.159	2|3|2	5|9|7	1.43	0.068	0.055|0.001|0.548	CotAD_19316	MEGGKYLLHCFLLALLTTKAVSHLVQSNANANRKSYIVYMGDRLKDGTSTALLHSSMVQDVFGSESKTVLYSYKKSFNGFVVDLTEEEAQKMAGMKGVVSVFSNEKRKLHTTRSWDFMGFPQQVERATMESDVIVGILDTGIWPESLSFDDKGLGPPPSKWKGSCQFLPQDNFTCNNKIIGAKYYRSDGLFLPDDFESPRDFDGHGTHTASTAAGNLVDGASLYGFGSGTARGGVPSARIAVYKICWSDGCQDADILAGLDDAISDGVDIISISVGGGRTRDYFEDAIDIASFHAMKNGILTVSSAGNEGPGRSTISNFSPWSLSVAASTIDRKFSTKVQLGNKKIYEGVSINTFDLKNKTYPMIYGGDAPNTTTASSRSSRLCFPNSLDKKLVKGKIV…	65.68	0	gi|225449348|ref|XP_002277563.1|	PREDICTED: cucumisin-like [Vitis vinifera]	BS_aprX
1092	CotAD_59599	37255.2	0.073	1|2|2	1|4|2	2.19	0.054	0.151|0.059|0.036	CotAD_59599	MNQRLASWTLVVGLFVVSCVAELERFEHAGKPDGSLSFLVVGDWGRRGHYNQSQVAFQMGKIGEQLDIDFIISTGDNFYDNGLTGVDDPLFHQSFTDIYTAPSLQKQWYNVLGNHDYRGNAEAQLSPILTKMDNRWLCLRSFVLNAGPEIAEFFFMDTTPFVTKYFTDPEDHVYDWKAILPREKYLNNLLMEVESALGESRAKWKIVVGHHAIKSAGHHGNAKELNIHLLPLLQTYDVDLYINGHDHCLQHISSSDSGTQFMTSGGGSKAWRGDVSWWNPQELKFYHDGQGFMSVEMTPTEVSIKFYDVFGNVLHNWSSSKQLSFAI	72.19	4e-178	gi|225424458|ref|XP_002285160.1|	PREDICTED: purple acid phosphatase 3 isoform 1 [Vitis vinifera]	all1686
1093	CotAD_01807	21613.9	0.075	1|1|1	4|3|5	1.8	0.08	0.001|0.201|0.001	CotAD_01807	MASAFSYNSFGFLLILVAFSSLINISSAGRQIAPKTSIEFIRTSCSSTTYPKLCYESLLTQASMIQTSPQLIAHAALNVTLSTAKSTSALMVKLAKSQGLKPTEVGAMQDCVEELEDTIDELRKSISEMGQLKGSNFGLMINDIQTWVSAALTDENTCADGFGGKNMNGSVKTAVRSKIVTIAHLTSNALALVNSYASFHG	67.16	2e-95	gi|255539741|ref|XP_002510935.1|	21 kDa protein precursor, putative [Ricinus communis]	-
1104	Cotton_D_gene_10022790	64943.7	0.252	7|7|8	20|16|24	2.6	0.214	0.001|0.001|0.001	Cotton_D_gene_10022790	MIGLGSYGYTAPSSKKINAYDVPQGVDIRGRFDEEFAKILTKDALQFVADLQREFRNHIKYAMECRKEAKRRYNEGALPGFDPATRYIREGKWTCAPFPPAVADRRVEITGPVERKMIINALNSGAKVFMADFEDALSPSWENLMRGQINLKDAVEGTITFNDKARNRVYKLNNEIAKLFVRPRGWHLPEAHIFIDGEPATGCLVDFGLYFYHNYATFRNTQGQGFGPFFYLPKMENSREAKIWNSVFEKAEKMAGIEKGSIRATVLIETLPAVFQMDEILYELRDHSVGLNCGRWDYIFSYVKTFQGHPDRLLPDRGQVGMTQHFMRSYSDLLIRTCHRRGVHAMGGMAAQIPIRDDPTANEAAFELVRKDKQREVKAGHDGTWAAHPGLIKTCMEVF…	99.29	0	gi|126770|sp|P17432.1|MASY_GOSHI	RecName: Full=Malate synthase, glyoxysomal	PAE1287
1111	CotAD_63121	98979.6	0.22	1|-|2	1|-|2	2.21	-	0.001|-|0.003	CotAD_63121	MLSHLLHAVAGDDNGNKKMKPEKIKGTVILMKKNVLDFNDFHASFLDGFHELLGKRVSFQLISSQQVDADNGLQGKLGKEAYLEDWNSTETSAVAGESKFDVNFDFEEEIGLPGAFLIRNNHHSEFYLKTLTLEHVPGHGRLHFVCNSWVYPDKKYDNPRVFFTNKTYLPHEMPKPLLQYREQELMALRGNGQGELQESDRIYDYAYYNDLGNPDKGPEYARPVLGGSAKYPYPRRGRTGRPPAKSDPKTESRIPLLMSLNIYVPRDERFGHLKMSDFLAYALKSIVQFIVPELQDLTDKTHNEFDSLEDVLKLYYGGVKLPSGPLLDNIINNIPLEMLKEIFRTDEAQLLKFPVPQVIQDSKTAWRTDEEFAREMLAGVNPVIIRLLQEFPPKSNLDP…	97.23	0	gi|124365601|gb|AAK50778.4|AF361893_1	bacterial-induced lipoxygenase [Gossypium hirsutum]	-
1116	Cotton_D_gene_10032835	56352	0.247	8|8|7	32|26|23	1.57	0.006	0.001|0.001|0.001	Cotton_D_gene_10032835	MSSSEEPFSQVQARLAVLASHLAAPDCSSNNLNSCVLEPWCVSAQNGGSVGLSLTIIDERTGKKYQVPVSSEGTIRATDLKKITTGKGDKGLKVYDPGYLNTAPVRSSISYIDGDEGILRYRGYPIEELAESSTFLEVAYLLMYGNLPSESQLADWEFAVSQHSAVPQGILDIIQSMPHDAHPMGVLVSAMSALSVFHPDANPALRGQEIYKSKQVRDKQIARIIGKAPTIAAAAYLRMAGRPPVLPSSTLSYAENFLYMLDSMGNRSYKPNPRLARVLDILFILHAEHEMNCSTAAARHLASGGVDVYTALAGAVGALYGPLHGGANEAVLKMLGEIGTVENIPEFIEGVKNRKRKMSGFGHRVYKNYDPRAKVIKKLAEEVFSIVGRDPLIEVAISL…	87.08	0	gi|312282631|dbj|BAJ34181.1|	unnamed protein product [Thellungiella halophila]	gltA
1117	CotAD_44487	49466.4	0.086	2|1|3	10|5|7	1.23	0.004	0.001|0.342|0.077	CotAD_44487	MKVEMNLDNDSNNLVQAPTNGNSEKLSPSTLSSLLGSKDRYYLLCSTAAAAETDQVKISDLEGKVIGIYFSANWYPPCRNFNRVLIGVYEQLKSNGSNFEIVFVSSDEDLDAFNNYRENMPWLSIPFSDLETKKALNRKYDVESIPCLVILQPDNTKDDDTYYDGVELIYRYGVDAFPFTKEKLDELRREEKRKHDSQTVTNLLTNPERDYLLDQTITRKVPVDSLKGKTVGLYLSAQWCMPCVEFTPKLISIYQKIKQALQEKGGGEDFEIVFVSNDRDQSSFESYFGTMPWLALPFRDPTARTLAKYFDVQWIPCLIIIGPDGKTVTKQGRNLINLYQENAYPFTDAKVESLEKELEEAAKSLPRSEYHAGHRHLLTLVSEGSGGGPFICCDCEEQG…	69.79	0	gi|224083147|ref|XP_002306954.1|	predicted protein [Populus trichocarpa]	-
1119	CotAD_42259	54659.4	0.037	2|1|1	9|2|6	1.29	0.012	0.001|0.404|0.110	CotAD_42259	MLTVSVKWQKELLKAVEIDTSQPPYVFKCQLYDLTGVPPERQKIMVKGGLLKDDADWSTVGLKQGQKLMMMGTADEVVKAPEKGPVFMEDLPEEEQVVSLGHSAGLFNLGNTCYMNSTVQCLHSVPELKSSLVKYSHSGRNNDVDQTSHMLTIATRDLFGELDKSVKPVAPMQFWTLLRKKYPQFGQLHNGVFMQQDAEECWTQLLYTLSQSLRSAGSSENIDTVKDLFGIDLASRIHCQESGEETSETESVYSLKCHISQEVNHLHEGLKHALKSELEKASPALGRSAIYLKESRINGLPRYLTIQFVRFFWKRESNQKAKILRKVDYPLELDVYDLCSDELRKQLEGPRQILRDEEGKKLGLKANGKSSSSKDDDVKMIDGEGSSNASGESTVTTSQ…	87.58	0	gi|225442341|ref|XP_002281000.1|	PREDICTED: ubiquitin carboxyl-terminal hydrolase 6 [Vitis vinifera]	SPCC188.08c
1130	CotAD_73853	31101.8	0.322	1|1|1	3|3|7	1.35	0.013	0.001|0.001|0.042	CotAD_73853	MGKGPGLYSDIGKKARDLLYKDYQADHKFTVTTYTSNGVAITSTGIKKGELLLADVSTELKNNNITTNVKVDTKSTLFATVTVDEPAPGLKTIFSFIVPDQRSGKVELQYQHEYAGISTSIGFNANPLVNFSGVVGNNCVSVGTDLSFDTASGNFTKLNAGLNFTHSDLIASLTLNDKGDTLNASYYHIVSPLTNTAVGAELTHSFSSNENTLTIGTQHALDPLTTVKARLNNYGRASGLIQHEWRPKSLFTISGDVDTRAIEKSAKVGLXXXXXXXXXXXXXXXXXXX	85.19	2e-161	gi|449458029|ref|XP_004146750.1|	PREDICTED: mitochondrial outer membrane protein porin of 36 kDa-like [Cucumis sativus]	-
1133	CotAD_49650	10631.7	0.186	1|-|1	2|-|2	1.67	-	0.035|-|0.283	CotAD_49650	MAKRLIPSFNRILVEKIIPPSKTNSGILLPEKTPKLNSGKVVAVGPGAQDRDGKHIPVNLKEGDTVLLPEYGGTEVKLGEKEYHLYRDDDILGTLHD	88.66	2e-57	gi|224103971|ref|XP_002313267.1|	predicted protein [Populus trichocarpa]	Cgl0581
1139	Cotton_D_gene_10009864	80707.4	0.198	5|6|8	12|14|22	1.16	0.009	0.266|0.628|0.001	Cotton_D_gene_10009864	MATSNLKQTLGDLNKESFISLLTKIIGESKFLQNNPPELIPEEDRVIKHVLDCLLPYSTTTGGPLIVNHVTYFPGRGNLIVEYPGTQPGKILSFVGMHMDVVTANPNDWDFDPFSLSIDGDKLRGRGTTDCLGHVALVTELMKRLAETKPKLESTVVAVFIANEENSAITGVGVDALVKDGLLDKLKGGPLFWIDTADKQPCIGTGGMIPWKLQVTGKLFHSGLPHKAINALELGMEALKEIQLRFYKDFPPHPDEQVYGFATPSTMKPTQWNYPGGGINQIPGECTISGDVRLTPFYNVKDVMSKLQEYVDYINENLNKLDTRGPVSKYILHDENLRGSLTLTFDEAMSGVACDLNSRGFHVLCKATEEAVGHVKPYSITGSLPLIRELQDEGFDVQT…	87.09	0	gi|462404885|gb|EMJ10349.1|	hypothetical protein PRUPE_ppa005898mg [Prunus persica]	BMEII0268
1149	Cotton_D_gene_10019259	19311.2	0.297	4|3|3	9|12|12	2.37	0.049	0.003|0.002|0.001	Cotton_D_gene_10019259	MLKQFSLVFFVLFACYVGVNSRELKHITKELEVNAPAYEAWELYRNLGLINIIVPKLPNVQSTQVLKGDGGVGTVAKTTFVPGNSSYTEEFIVIDDKKRVKAAKALEGDCLAFGCSVLIVEFDIKEKSQNSCIIKSIISYAVKKEFEAKDPKPTVAVEAITQASKEYLERNN	46.34	1e-30	gi|460389998|ref|XP_004240631.1|	PREDICTED: S-norcoclaurine synthase-like [Solanum lycopersicum]	-
1161	CotAD_20203	58128.8	0.018	-|-|1	-|-|1	5.31	-	-|-|0.035	CotAD_20203	MDCNATEGHDADQQLQQTSIQAGPEKSFDEHETMRSVDEVKQWKTAFAEVGKLQGWHIDGSISDRPETQYIKDIVAYVMQKLMKHQVFLSLGELSDIMDRKHNPTDKHIVLLVFYHVDPSDVRNIGGHFKASFEEHESEQPADRVQQWKTAFAEVDELKGWHIEGGKFDKPETQYIKDVVEYVIKKLSNIKSGSASEELVGIDDQKRTILKLIKQKDSRVIGLWGMGGQGKATLAEAVYKKISLEFESLVNLRKIYFKGCVNLRKIPNLSRAIKLEILDCSNCESLVELWNEDDHMGLVNLREIDFEGCVNLRKIPNLSRAIKLKILDCSNCKSLVELWNEDDHMGIYFEECMNLRKIPNLSRAINLRVLDCSNCESLVALPCLNHLASLAKLLLYGCS…	29.66	9e-31	gi|298204574|emb|CBI23849.3|	unnamed protein product [Vitis vinifera]	-
1166	Cotton_D_gene_10027557	25243.8	0.089	1|-|1	5|-|2	1.68	-	0.001|-|0.648	Cotton_D_gene_10027557	MNFKSLSLFSISFIALCFTVASAASFDIRNNCPYKVWAAAVPGGGRELSKGGVWNLKVNPGTTGARIWGRTNCQFDRAGRGRCQTGDCGGLLQCNAYGVAPNTLAEFALNQFNNLDFFDISLVDGFNVPMEFSPTSGRCSRGIRCTADIIGQCPNELKAPGGCNNPCTVYKTDQYCCNSGNCVPTDFSRFFKARCPDAYSYPKDDQTSLFTCPGGTNYRVVFCP	85.78	2e-122	gi|88193285|gb|AAV34889.2|	osmotin-like [Theobroma cacao]	-
1185	Cotton_D_gene_10006548	66739.4	0.076	1|-|-	3|-|-	1.69	-	0.038|-|-	Cotton_D_gene_10006548	MCGILAVLGCSDDSQAKRVRVLELSRRQVIFLSLKHRGPDWSGLYQHGDCYLAHQRLAIIDPASGDQPLFNEDKSIVVTVNGEIYNHEELRKKLAHHKFRTGSDCDVIAHLYEEYGEDFVDMLDGIFSFVLLDTRDNSFIVARDAIGVTSLYIGWGLDGSVWISSELKGLNDDCEHFESFPPGHLYSSKSGGFRRWYNPPWFSEAIPSVPYDPLVLRRAFENAVTKRLMTDVPFGVLLSGGLDSSLVASITARYLAGTKAAKQWGAQLHSFCVGLEGSPDLKAAREVADYLGTVHHEFHFTVQDGIDAIEDVIYHIETYDVTTIRASTPMFLMSRKIKSLGVKMVISGEGSDEIFGGYLYFHKAPDKDEFHRETCRKIKALHQYDCLRANKATSAWGLE…	98.64	0	gi|383932352|gb|AFH57273.1|	asparagine synthetase [Gossypium hirsutum]	MJ1116
1191	CotAD_59374	59914.3	0.077	1|1|2	4|1|3	1.68	0.075	0.005|0.075|0.441	CotAD_59374	MAENMSLAIDPRSGFCRSNSTFYSKRKPIPLPKNDSLDVTTFISARAHHGKVAFIDAATGRHLTFSELWRAVDSVATCLSDMGIRKGHVVLLLSPNSIFFPIVCLSVMSLGAIITTTNPLNTANEIGKQVADSKPVLAFTIPQLLPKLAGSTIPIVLLEDHLSSQAGEAKIVTTLHQMMKREPSGSRVRDQVNQDDTATLLYSSGTTGASKGVVSSHRNLIAMVQTVINRFSIEVGEKFICTVPMFHIYGLVAFATGLLASGSTVIVLSKFEMHDMLSTIEKYRATYLPLVPPILVAMVNAADQIRKKYDLSSLHSALSGGAPLSKEVIEGFLEKYPNVKILQGYGLTESTGIGASTDSLEESRKYGTAGMLSPSMEAKVVDPDSGKALNVNQTGELWL…	79.67	0	gi|255539150|ref|XP_002510640.1|	AMP dependent CoA ligase, putative [Ricinus communis]	NMA1743
1192	CotAD_60514	45994.9	0.065	-|2|-	-|6|-	1.85	-	-|0.005|-	CotAD_60514	MDQQESPRSPEAKLGMKVEDLWGVQEPKLSPNEKLNACFESIPVSAFPLAPQGIEIKSDASLAEAVQILAQNKILSAPVVDVNAPEDATWIDRYIGIVEFAGIAIWILQQSEPPSPRSPSSPSGTYFAVSINGMTSAVGLGTLGPEDASITSGDFFEALTSSKFYKNTKVRDISGTFRWAPFLALQKSNSFLTMLLLLSKYKMKSVPVVDLGDGKINNIITQSAVIHMLAECTGFHWFESWGTKKLSEIGLPTMSPKEIIKVHEDQPVLQAFKLMRKNRIGGVPVVESGGKKAIGNISLRDVQFLLTAPEIYRDYRSITAKNFLIAVKNYLEKHDKRSPMLSGTVTCKRDKTVKELIQTLDSEKIHRMYVVDDDGNLEGVITLRDIISRLVHEPHGYFG…	80.48	0	gi|255540259|ref|XP_002511194.1|	AMP-activated protein kinase, gamma regulatory subunit, putative [Ricinus communis]	lin2901_2
1201	CotAD_62732	37343.3	0.175	5|4|4	152|101|77	2.31	0	0.001|0.001|0.001	CotAD_62732	MACFQYIVAALCFAVVLEGSLSKAQLTPTFYDGTCPNVTAIIRQVLVNASFSDPRIGASLIRLHFHDCFVQGCDASILLDDPVNGEKEAIPNNNSARGYEVIDAMKAALESACPNTVSCADILAIASEQSVSTLAGGPSWAVPVGRRDGFTANRTLANSNLPGFNNTLDRLKDRFSNVGLNTSIDLVALSGAHTFGRAQCLTFTSRLYNFTGVGDTDPTLNATYLEELRQICPQGGNSSVLTNLDPTTPDGFDNNYFTNLQVNRGLLRSDQNLFSTEGADTIEIVNRFSSNQTAFFESFVESMIRMGNISPLTGTEGEIRSNCRAVNSATIRSNSDAALVSSI	98.54	0	gi|19569160|gb|AAL92037.1|AF488305_1	apoplastic anionic gaiacol peroxidase [Gossypium hirsutum]	-
1207	Cotton_D_gene_10024993	24762.4	0.245	4|2|3	8|3|3	1.19	0.001	0.044|0.515|0.458	Cotton_D_gene_10024993	MKIGFLVFVAVALLAFLCSPNAVYGIRFVIDREECFSHDVKYEGDTIHVSFVVIKADSTWHNSHEGVDLVVKGPTGDQIQDFRDKISEKFEFVAHQKGIHRFCFSNKSPYYETVDFDVHESHFTYYDQHAKDEHFNPLLEQISKLEEALYNIQFEQHWLEAQTERQAIVNEAMSKRAVHKAFYESAALIGASVLQVYLLRRLFERKLGMSRV	78.77	9e-123	gi|462401541|gb|EMJ07098.1|	hypothetical protein PRUPE_ppa011405mg [Prunus persica]	-
1218	Cotton_D_gene_10020542	51915.8	0.179	-|1|2	-|2|6	1.43	-	-|0.565|0.001	Cotton_D_gene_10020542	MASLPFIFFLSFFIISTTLTSAGAAAATIKLSLSPFPHPSSSHPYQILNNLVTSSVARAHHLKHPKAKADNTTSSLLRASLFPHSYGGYTISLKFGTPPQTLPFIMDTGSSLSWFPCTSRYLCSQCAFPNVDPAKIPTFAPKRSSSKKLVGCRNPKCSWLFGPDVASRCQDCEPTSENCTQTCPPYLIQYGLGSTAGLLLVENLVFPQKTFQDFLVGCSILSNRQPAGIAGFGRSAESLPSQLGLKKFSYCLVSRRFDDTGVSSNMLLETGSGSGDAKTPGLSYTPFYRNQVASNPNFKEFYYVTLRKILVGDKHVKVPYSYLVPGSDGNGGTIVDSGSTFTFMDRPVFEVVSKEFEKQMGNYRRAREIENISGLAPCFNISGYTSIKFPELSFQFKGG…	66.82	0	gi|224091907|ref|XP_002309394.1|	predicted protein [Populus trichocarpa]	-
1219	CotAD_24454	59370.3	0.253	8|8|7	18|22|20	1.45	0.004	0.001|0.002|0.001	CotAD_24454	MPNPMRPYLILSVVFFFNLYHSMAVPDPTHQALLQCLTQSIPTDTASSIIVSKSNPSYTSVLRAYIRNARFNTSSTPKPLIIITPLDESHVSAAVICSQKLGFQLKIRSGGHDYEGLSYVFDNPFFVLDMFNLRSITVNMADETAWVGAGATLGELYYNIWKNSKVHGFPAGVCPTVGVGGHLSGAGYGTLIRKYGLSVDHVVDAKLVDVNGKILDRKTMGEDLFWAIRGGGAASFGVVLSYKIKLVPVPETVTVFRIERLLTENATDITFKWQTIAPTTDENLFMRMLLQPVTRNKKKTARISVIALYLGDSDSLVSLLQKDFPELSIGKSNCNETTWIDSVLWWANFNLGTPPTALLDRDLNDAGFLKRKSDYVQTPIPKSGLESLWQKMIELGKVG…	67.49	0	gi|224056797|ref|XP_002299028.1|	predicted protein [Populus trichocarpa]	MT1767
1231	CotAD_63183	78840.6	0.281	3|3|3	66|64|51	1.22	0	0.001|0.001|0.001	CotAD_63183	MDISAMPKAFSNQHTWYLATLSSVSAKSKAETNPTTPFSKLIYTYNHVIQGFSASLTPAELESLKNSPGYVSSVKDRVVKVDTTHSFEFLDLNSGTGAWPVSSFGKDVIVGVIDTGVWPESESFNDDGMSDVPSRWKGECESGTQFNSSLCNKKLIGARFFNKGLIAHNSNITISMNSTRDTEGHGTHTSTTVAGTYVKDASYFGYAPGTARGMAPMARVAMYKALWEEGAYTTDIIAAIDQAITDGVDVLSMSLGLDGVDLYEDPIAIATFAAIEKNIFVSTSAGNEGPDVETLHNGTPWVITVAAGTMDRDFGATLILSNKVSINGLAQYPGNFTSTEFPIVFMDTCSNKTELSKIKQKIIVCQDPGKEDSLDDQFNNILAAGNIAAVFITNSSSVD…	64.92	0	gi|462418894|gb|EMJ23157.1|	hypothetical protein PRUPE_ppa001770mg [Prunus persica]	slr0535
1242	CotAD_07362	26998.9	0.108	2|2|1	7|3|3	1.44	0.015	0.001|0.159|0.032	CotAD_07362	MSTGQLLSIEPQELQFPFELRKQISCSLNLSNKTDNYVAFKVKTTNPKKYCVRTNTGVVLPRSTCNVVVTMQAQKEAPTDMQCKDKFLLQSVVASPGATTKDITAEMFNKESGHNVEECKLRVVYVAPPRPPSPVREGSEEGSSPRASVSDNGSFNAAELTSVSRAHVDRHETQDNSSDARSLISKLTEEKNSAIQQNSKLQQELELLRREAKRNQSGIPFIYVFLVGLIGIILGYLLKRT	81.9	1e-124	gi|255541186|ref|XP_002511657.1|	vesicle-associated membrane protein, putative [Ricinus communis]	YER120w
1244	CotAD_27999	27518.7	0.14	1|1|1	7|7|2	1.63	0.02	0.015|0.002|0.284	CotAD_27999	MSYLTISQISSILFFSVLFISAHAARFEIRNECPYTVWAAASPGGGRRLDPRQSWTINVPAGTAMARIWGRTNCNFDANGRGHCQTGDCGGLLECQGWGVPPNTLAEYSLNQFGNMDFYDISLIDGFNIPMVFGPTNGGCHNIRCTADLKGQCPNELRAPGGCNNPCTVFKTNEYCCTQGYGTCGPTYFSRFFKDRCHDSYSYPQDDPSSTFTCPAGSNYRVVFCPRGSPRIEMVGSKNQEK	100	1e-155	gi|33340043|gb|AAQ14497.1|AF304007_1	osmotin-like protein [Gossypium hirsutum]	-
1251	CotAD_64599	81586.8	0.057	1|1|1	5|7|15	1.41	0.014	0.092|0.011|0.001	CotAD_64599	MAAISTASTDKRTYIVRMDKTKITNTFSSLVSITKPWHQAVLESLADDDELEATPPELLYSYETALFGFAAKLSSKQLESLKNMEGFISAVPDKMLSLHTTRSPFFLGLTGKKGKNGPWSGSTSNLHSDVIIGVVDSGIWPEHVSFRDHGLSPVPERWRGTCEKGTKFSPSNCNKKLIGARYFYGGYLAAGGKIDETNEYVSTRDASGHGTHTASTAGGNFVEQANLFGVANGSAAGMRYTARIAAYKVCWPGCSTIDILTAMMKAIEDGVDVLTLSLGSTSEAVPYWQDYLAIASYFAFKSGIFVAFSAGNSGPWAYTAVNTAPWIMTVAASTIDRSFPAIIRLGNGETFEGSSFYTGKALKGLPIVYGKTAGVTGAEHCIPGTLNPKLVKGKLVICE…	60.26	0	gi|225453867|ref|XP_002272965.1|	PREDICTED: subtilisin-like protease-like [Vitis vinifera]	BS_bpr_1
1255	Cotton_D_gene_10025436	38541.7	0.143	2|1|3	2|1|7	2.34	0.073	0.034|0.213|0.001	Cotton_D_gene_10025436	MNRFVLRSVKQCLVNGQRYYGSGGGLVYGSSVVGRSVHLSGQRNGVMFGGFEWRRMMSSAPASMEKAPSEKKEQEKEETKGKDIVASSYWGISRPTITREDGTVWPWNCFMPWETYKADVSIDLKKHHVPKNFLDNLAYRTVKLLRIPVDLFFQRRYGCHAMMLETVAAVPGMVGGMLLHLKSLRKFQQSGGWIKALLEEAENERMHLMTIVELVKPKWYERLLVLAVQGVFFNGFFVLYLSSPKLAHRFVGYLEEEAVFSYTEYLESIESGETENVPAPAIAIDYWRLPKDARLKDVITVIRADEAHHRDINHFASDIQFQGKELREAPAPVGYH	71.51	2e-173	gi|462419393|gb|EMJ23656.1|	hypothetical protein PRUPE_ppa008213mg [Prunus persica]	-
1257	CotAD_59095	18666.4	0.253	2|-|2	5|-|8	1.5	-	0.011|-|0.001	CotAD_59095	MASQSSKGSVHDFTVKDARGNDVDLSIYKGKVLLIVNVASQCGLTNSNYTELSKLYEQYKDQGFEILAFPCNQFGGQEPGNNEQILEFACTRFKAEYPIFDKVDVNGEKAAPVYKFLKSSKGGLFGDSIKWNFSKFLVDKEGHVFDRYAPTTSPLSIEKDIKKLLA	88.69	7e-109	gi|125620186|gb|ABN46985.1|	glutathione peroxidase [Nelumbo nucifera]	XF1890
1262	Cotton_D_gene_10017112	28240.5	0.078	2|2|2	13|10|11	1.3	0.005	0.013|0.005|0.001	Cotton_D_gene_10017112	MVAATVGLRGLSLCTLSLPILRSAKIKLPIHSFPTSRSLKPLFSPYNPTILRGFPSFCASPDVNVEATATAPPATEAENSQSADDIKNAANLLDIRVGRIIKAWRHEEADSLYVEEVDVGEPEPRIICSGLVKYMPLDLLQDAKVVVLANLKPRNMRGVKSCGMLMAASDASHETVELLMPPDGTIPGERIWFGTEDDKDSQPEPATPNQVQKKKIWESVQPHLKIDASCTAMLGEYLMRTSAGVVVCKSLKNANIS	68.18	4e-110	gi|255576659|ref|XP_002529219.1|	methionyl-tRNA synthetase, putative [Ricinus communis]	APE0675
1263	Cotton_D_gene_10001403	46736.2	0.228	2|2|2	5|7|14	2.1	0.219	0.004|0.001|0.001	Cotton_D_gene_10001403	MVQTNQSGSGNDFKLVGFSNFVRSNPKSDRFTVKRFHHIEFWCTDATNVARRFSWGLGMQFVAKSDLSTGNLTHSSYLLRSGDLNFLFTAPYSPSIAVAQNLSPQSTASIPSFDHSLCRSFAATHGLGVRAIAIEVDDAETAFTTSVTHGALPFSPPTPLGDVATIAEVKLYGDVVLRYVSYTTTINSDHDFLPGFEKIEDALSYPLDYGLRRLDHAVGNVPELGPAVSYVKSFTGFHEFAEFTAEDVGTSESGLNSVVLANNEEMVLLPMNEPVFGTKRKSQIQTYLEHNEGAGVQHLALVSEDIFKTLREMRKRSFVGGFEFMPSPPPTYYKKLKQRAGDILSDEQIKECEELGILVDRDDQGTLLQIFTKPVGDRQDEEGKQYQKGGCGGFGKGNF…	77.37	0	gi|449453770|ref|XP_004144629.1|	PREDICTED: 4-hydroxyphenylpyruvate dioxygenase-like [Cucumis sativus]	RSp1400_2
1280	CotAD_64749	64124.7	0.101	1|3|1	4|8|5	2.6	0.194	0.105|0.002|0.192	CotAD_64749	MEEEGRYEAEVAEVQAWWNSERFKLTQRQYSARDVVALRGNLKQSYGSNEMAKKLWRTLKTHQGNGTASRTFGALDPVQVTMMAKHLDSIYVSGWQCSSTHTTTNEPGPDLADYPYDTVPNKVEHLFFAQQYHDRKQREARMSMSREERARSPYVDYLKPIIADGDTGFGGTTATVKLCKLFVERGAAGVHIEDQSSVTKKCGHMAGKVLVAVSEHINRLVAARLQFDVMGVETVLVARTDAVAANLIQTNVDTRDHQFILGVTNPNLQGKGLASMLAEAMVAGKTGVELQAIEDKWLAMAQLKTFSESVIDAINNMNIREDEKRRRMNEWMDHSSYDKCLSNEQAREIAERLGLKNLFWDWDLPRTREGFYRFKGSVMAAIVRGWAFAPHVDLIWMET…	92.2	0	gi|113029|sp|P17069.1|ACEA_GOSHI	RecName: Full=Isocitrate lyase; Short=ICL; Short=Isocitrase; Short=Isocitratase	BMEI0409
1303	CotAD_56900	14784.5	0.275	2|3|3	7|6|4	1.52	0.019	0.011|0.005|0.015	CotAD_56900	MMKQFSLVFSVLLACYNRVNSQELKHITNEDEVNAPASEAWELYRNLGISELVAQELKNVIQRLDVLEGDGGVGTVIKVTFVPGNSSYTEKFTVIDDQRRVKETQGLEGDCLAIGCSVQIVEFEIIEKSQN	49.07	1e-29	gi|351727799|ref|NP_001237429.1|	uncharacterized protein LOC100305838 [Glycine max]	-
1304	CotAD_32171	35466.8	0.347	8|7|6	40|40|40	2.26	0.016	0.001|0.001|0.001	CotAD_32171	MATVSQLNNFPCKTFLIIPQNSNFTSKLPVLPLNSTKPTQNSIKKSQFLTQKSVQPRPVFQIRASDADDEWGPDKEEPVVIESPGVAVAEEKKPDDAGEIESLKKALVDSFYGTDRGLKASSETRAEIVELITQLEAKNPTPAPTEALPLLNGKWILKYTSFPGLFPLLSRGQFPLVKVEEISQTIDAESLTVQNSVQFAGPLASSSISTSAKFEVRSPKRVQIKFQEGIIGTPQLTDSIVLPENVEFLGQKIDLTPIKGLLTSVQDTASSVAKTISSQPPLKIPLSNSNAESWLLTTYLDDELRISRGDAGSVFVLVKEGSALLN	73.54	3e-153	gi|255566853|ref|XP_002524410.1|	Plastid-lipid-associated protein, chloroplast precursor, putative [Ricinus communis]	-
1316	Cotton_D_gene_10025381	44969.2	0.443	12|12|13	78|36|54	1.69	0.001	0.001|0.001|0.001	Cotton_D_gene_10025381	MGKRRCVVAALAAIMLMMELAALTVAENRRSMLSNGLGMTPPMGWNSWNHFGCNIDEKMIRETADALVSTGLSKLGYEYVNIDDCWAEISRDDKGNLVPKKSTFPSGIKALADYVHKKGLKLGIYSDAGYFTCSRRMPGSLGYEEQDAKTFASWGIDYLKYDNCNNDGSKPTKRYPVMTRALMKAGRPIFFSLCEWGDMHPAEWGAPVGNSWRTTNDISDNWESMISRADQNEIYAEYARPGGWNDPDMLEVGNGGMTKDEYIVHFSLWAISKAPLLLGCDIRNMTRETMDIITNKEVIAVNQDPYGFQAKKVRMEGDQEIWSAPLSGYKIAVVLLNRGPVRYSTTARWDDIGLDPKTVVQARDLWEHKTLKTTFVGNLTATLRPHSCKLYVLKPIA	83.47	0	gi|255544191|ref|XP_002513158.1|	alpha-galactosidase/alpha-n-acetylgalactosaminidase, putative [Ricinus communis]	-
1321	CotAD_44770	91929.6	0.189	2|5|2	11|13|8	1.14	0.015	0.257|0.888|0.007	CotAD_44770	MKIFLLFLLFCFFTSLFNSCFAGNVTYDRRSLIIDGQRKLLISAAIHYPRSVPAMWPGLVQTAKEGGVDVIESYVFWNGHELSPGKYNFEGRYDLVKFVKIVQQAGMYMILRIGPFVAAEWNFGGVPAWLHYVPGTVFRTDNEPFKYYMRNFTTFIVNLMKQEKLFAPQGGPIILAQASTILNLEVENEYGYYEKFYGEGAKRYVTWAARMAVSQNNGVPWIMCQQDDAPEPVINTCNSFYCDQFTPNSPNKPKIWTENWPGWFKTFGARDPHRPAEDVAFSVARFFQKGGSVHNYYMYHGGTNFGRTSGGPFITTSYDYEAPIDEYGLPRLPKWGHLKELHKAIKLSEHALLKSEPTTLSLGPSQEADVYDDGSEVCAAFLANLDDKTDKNVVFRNVS…	78.22	0	gi|359480881|ref|XP_003632537.1|	PREDICTED: beta-galactosidase 3-like [Vitis vinifera]	PAB1349
1322	CotAD_50957	36738.8	0.139	4|4|4	14|18|15	1.23	0.001	0.001|0.001|0.001	CotAD_50957	MAATQLKPCLVLLLTFSVLAFASAISRNRIKSLNQIREVNRKGPYIGLITVIATEEDAFFASGSFKPDPKFPFIDLSGRRFRFGVVRGRKVVYVRCGEGMTNAVAATQQMVDLFDIKGIIHFGIAGNTNNSMSIGDVTIPNQIAHTGLWEWFNTNGTLDSADVAQLEIGDYNVPKGNGTNLLGLIGYMEEEYYSVAGEPNVAESLLWANISLQWLQLASNLEGMKLEQCVNSSLCLTERPKLVVGLRASTSNIFLDNAAYRDFLFQKFGVSSADMESAGVAMTSLSNGYPVIVIRGLSDLAGNQEGDNAVRKFGGLAAVNSVKAVLGFIRNLPSSTR	67.66	3e-150	gi|225449647|ref|XP_002262699.1|	PREDICTED: bark storage protein A [Vitis vinifera]	CAC2117
1323	CotAD_68229	37935.5	0.134	2|3|3	7|10|12	1.37	0.001	0.123|0.003|0.001	CotAD_68229	MATLSFKLVADCVKINEAKVPAIIVFGDSSVDAGNNNYIPTIARSNFEPYGRDFNGGHPTGRFSNGKIATDFISQAFGLKGAIPAYLDPSYSISDFATGVTFASAGTGYDNSTSNVLSVIPLWKELEYYKDYQTKLRANLGDGKANDIIKDALYMISVGTNDFLENYYAVPGRSSQYTIKEYENFLVGIAGNFTKALYDLGARKISLGGLPPMGCMPLERTGNLMGGSECVNSYNNLAAEFNSKLNDLVIKQNKELNGMDMVFSDPYGIMLDIIQKPAFYGFEVTGVACCATGMFEMGYACSRTNPFTCSDADKYVFWDSFHPTEKTNAIVANHVVQTSLAKFF	71.69	0	gi|225447182|ref|XP_002276681.1|	PREDICTED: GDSL esterase/lipase At2g04570 [Vitis vinifera]	XF0781_1
1329	Cotton_D_gene_10007024	20350.2	0.197	3|4|1	11|7|1	1.42	0.037	0.016|0.176|0.813	Cotton_D_gene_10007024	MVSVTKGVVLLSLLCFNVFVVNVIAKEVVSTKEEEEKYLTQGGGFGTGGGGGFGGGGGFGGAGGGGGFGGGHGGDFGKGGGYGGGIGKGGGVGGGIGKGGGYGGGIGKGGGIGKGGGVGGGIGKGGGYGGGIGKGGGIGKGGGVGGGIGKGGGYGGGIGKGGGIGKGGGYGGGIGKGGGHGIGGGIGKGGGVGGGIGKGGGIGKGGGFGGGTGGGFGKGGGFGGGVGGGAGGGKGGGFGGNGHH	-	-	-	-	-
1333	Cotton_D_gene_10029112	35712.8	0.372	5|6|5	22|19|20	1.29	0.007	0.001|0.003|0.001	Cotton_D_gene_10029112	MFRSVARSAAGKHLLRRGYATESVPDRKVAVLGAAGGIGQPLALLMKLNPLVSRLALYDIANTPGVAADVSHVNTRSEVAGYVGEDQLKQALEGCDVVIIPAGVPRKPGMTRDDLFNINAGIVKGLCAAIAKYCPNALVNMISNPVNSTVPIAAEVFKKAGTYDEKKLFGVTTLDAVRAKTFYAGKAKANVADVNVPVVGGHAGITILPLFSQATPKANLPEEDIKALTKRTQDGGTEVVEAKAGKGSATLSMAYAGAIFADACLKGLNGVPDVVECSFVQSTVTELPFFASKVRLGKNGVEEVMGLGPLSDYEQAGLESLKPELKASIEKGIKFANQN	88.86	0	gi|255566555|ref|XP_002524262.1|	malate dehydrogenase, putative [Ricinus communis]	SMc02479
1334	CotAD_22928	52242.8	0.029	1|1|1	3|3|1	2.12	0.075	0.206|0.002|0.150	CotAD_22928	MESAAGTADDSSNMPHKVVAVAAGEAHTLALSGDGYVYSWGRGMFGRLGTGSESDEIFPVRVKFQNSELKLIAVAAGAYHSLALADDGSVWSWGYNICAVKAGGMTSLAIDNLGALWMWGNCPQENNNGDGSLTFVSCFTPTPVWDFHGHTVVKVACGNEHVVALVSAGERHKGDDLLCYSWGGNGHGQLGLGDTESRARPEIVGTGQLGHGTTRSALVPEPVKELPKPVYLVSVDCGLFHTSVVSSAGDVWSWGMEKGLGLCPDASFTGTDSGDAISPLRIHGPKFNDPVQVSCGAAHTVLVAHDGYKLWSWGRGRSGVLGNGKTVDCFSPTVVLWPPLNEDFKQEELNQDDKIVDQKGSDGVLEMEKKLSLAMEEMKLLQSKLSTMERYASILHGSI…	63.73	0	gi|470109794|ref|XP_004291175.1|	PREDICTED: E3 ubiquitin-protein ligase HERC2-like [Fragaria vesca subsp. vesca]	SPCC330.11_2
1344	Cotton_D_gene_10015685	76929.6	0.105	4|3|4	12|6|6	1.42	0.027	0.001|0.001|0.033	Cotton_D_gene_10015685	MGLKYSWRFLALVFMVVIANFHGLNYAEKAPKYSFIQEATSAPEVSFYDYIVIGGGTAGCPLAATLSARDAKVLVLERGGSPYTNTTKIRMENVISTLTDDSPNSISQSFISEDRVPGNRARVLGGGTVINLGFYSRAETLFLKEAGIDEALANESYEWVEKKIVYKPGAFQWQTAVRNGLLEVGVLPDNGFTYAHLNGTKTSGTIFDKNGNRHTAADLLEYANPTMIKVYLHAVVHKITFTIKDGQRPKADGVIFYDANGGRHIAYLKHESNNRSEIILSAGAIGSPQLLMLSGIGPTARLRSLGIKVVLDQPMVGREMADKPLNGLIIPYPTHIPLSLATVVGINKTSNYFESLNGFDLSALSGSGGAQPQTSNPSQEAMANSTRNQAFLVQTIFGP…	54.98	0	gi|356575920|ref|XP_003556084.1|	PREDICTED: protein HOTHEAD-like [Glycine max]	Rv1279
1346	CotAD_28678	50267.6	0.345	1|1|2	10|11|9	1.35	0.015	0.001|0.001|0.020	CotAD_28678	MSTIIFFNCCSSVTASKLINPRIPTKGSSFLRTHKSFSWWNRHFLPKCTSQKHVQCQLQNGQQKMRSFSLKECAISVALAAGLIIGMPSLDSSPMAYAANPSLPDLSVLISGPPIKDPGALLRYALPIDNKAIREVQKPLEDITESLKVAGVRGLDSVERNVKQASRSLKQGKSLIISGLAESKKDHGVELLDKLEIGMEELQQIVEDRNRDAVAPKQKELLKYVGDVEEDMVDSFPYEVPEEYRSMPLLKGRAAVDMKVKVKDNPNLEECVFHIVLDGYNAPVTAGNFVDLVQRHFYDGMEIQRADGFVVQTGDPEGPAEGFIDPSTEKTRTIPLEIMVDGEKAPFYGSTLEELGLYKAQTKLPFNAFGTMAMARDEFENNSASSQVFWLLKESELTP…	82.25	0	gi|462411532|gb|EMJ16581.1|	hypothetical protein PRUPE_ppa005738mg [Prunus persica]	FN1800
1351	CotAD_00919	30230.5	0.056	2|2|2	3|10|15	1.37	0.015	0.152|0.005|0.001	CotAD_00919	MSMSKSSKMLQFINYRMRVTIQDGRQLVGKFMAFDRHMNLVLGDCEEFRKLPPAKGKKNPSTNQEREDRRTLGLVLLRGEEVISMTVEGPPPPEESRSKSAAANAVPGPGIGRAAGRGIPTGPLVQAQPGLAGPVRGVGGPAPGMMQPQISRPPVPQLSAPPMTYPAASGAPPVIRPPGQMPPGGYPGQPQAPQMQRGPPPQVPPPAFGVRPPQQFPVPPPQYGQRPMVPPPGSMMRGPPGPPPPRPGMPAPPPPRPGMPPPPGAVPVFGPPRPGMPPPPNPPNQQQ	88.64	5e-74	gi|255578055|ref|XP_002529898.1|	small nuclear ribonucleoprotein-associated protein, putative [Ricinus communis]	YER029c
1352	CotAD_05555	21115.2	0.221	1|2|2	6|12|9	1.37	0	0.010|0.001|0.004	CotAD_05555	MAEEVKKQAEAETTAAPPPAVEVPKAESEEKTVSPPPAEEKPEESKALVVVEKAPEPEPKKISGGSHDRDIALAEVEKAKRLSFIKAWEESEKTKAENKSQKKLSAIVAWENSKKASLEAKLKKIEEQLEKKKAEYAEKMKNKVALLHKEAEEKRAMVEAKRGEEVLKAEEMAAKYRATGQTPKKVLGCF	85.31	8e-57	gi|224130228|ref|XP_002320784.1|	predicted protein [Populus trichocarpa]	-
1359	CotAD_67369	29565.4	0.384	4|2|3	9|6|8	1.29	0.005	0.001|0.094|0.109	CotAD_67369	MSKAPGLFVDIGKKAKDLLTKDYTSYQKFTVSTYTVAGVALTSTALKKGGLSTGDVAALYKYKNTQFDVKVETDSNISTTLTFTEILPSTKTIASFKVPDYKSGKLEVQYFHDHATVTTTVGLNQTPGVDVTATIGTPTITFGAEVGYDTTSGNFTKYTAGISVTKPDSCASIILGDKGDSIKASYVHYMDQQKKSAAVGEISRRFSTNENTFTVGGAYAVDHLTLIKAKLNSHGRLGALLQHEVVPKSLLTISSELDTKALEKSPRFGLALALKP	80.8	9e-165	gi|255568593|ref|XP_002525270.1|	voltage-dependent anion-selective channel, putative [Ricinus communis]	-
1360	CotAD_22884	20873.6	0.291	4|3|5	13|9|17	1.44	0.009	0.001|0.001|0.001	CotAD_22884	MEVVKNLDIQRYMGKWYEIASFPSFFQPKKGENTSAFYTLKEDGTVHVLNETFVNGKKDSIEGTAYKADPKSDEAKLKVKFYVPPFLPIIPVTGDYWVLYIDEDYQYVLVGGPTKKYLWILCRQKHMDEEIYNMLEQKAKDLGYDVSKLHKTPQSDSTPEGEHVPQEKGFWWIKSLFGK	100	3e-131	gi|77744869|gb|ABB02388.1|	temperature-induced lipocalin' [Gossypium arboreum]	AGl93
1381	Cotton_D_gene_10023028	67782.5	0.06	2|1|2	3|1|2	1.31	0.073	0.028|0.659|0.981	Cotton_D_gene_10023028	MLKLISILLLLISISSISVESRCSRGCDLALASYYVWQGSNLTFISQILNSSLVPYSTTNFDSILAYNPQVANKDSVEAFSRLNIPFPCDCINNDFLGHVFTYSVQPGDTYDKIAGYYSDLTTVAWLRPFNSYPETNIPDSGVVNVVVNCSCGDSAISKDYGLFVTYPLRENETLDTVLTQANLSSDLSGLVRLYNPGANFSSGSGLVYIPGRDAENSFRPLKSSKGISGGVIAGIAIAAVVVSLLLAFGIYAKFFRKKSKTTSLLSTVSHDVSAEAGNVFGSKAAESTGTVAASPGLTGITVDKSVEFSYEELAQATDYFSMANKIGEGGFGAVYYANLRGEEAAIKKMDMQASKEFLAELKVLTRVHHLNLVRLIGYCVEGSLFLVYEYIENGNLSQ…	69.92	0	gi|255568675|ref|XP_002525309.1|	receptor protein kinase, putative [Ricinus communis]	MT0018
1392	CotAD_48042	36580.7	0.064	2|-|1	3|-|2	1.81	-	0.036|-|0.053	CotAD_48042	MNNLFSGSFSRFRSEEASPDHHVIEMTQSSSTSGGVNLDKFFEDVESIKDELKELERLNDDLSASHERSKTLHNAKAVKELRAKMDADVAMALKKAKLIKVRLEALDRSNASNRSLPGCGPGSSSDRTRTSVVNGLRKKLKDSMESFNGLREKISSEYRETVQRRYFTVTGENPDEKTLDLLISTGESESFLQKAIQEQGRGRILDTINEIQERHDAAKDLEKNLKELHQVFLDMAVLVQAQGEQLDDIESHVNRANSFVRGGTERLQTARNYQKNTRKWTCYAIILLLVIVLFVVLFTVRPWENNGGGGGGGNNNPTSTPPAPPTA	86.51	1e-173	gi|255566161|ref|XP_002524068.1|	syntaxin, putative [Ricinus communis]	YOR036w
1401	Cotton_D_gene_10030285	22459.3	0.296	4|3|3	7|8|4	1.34	0.011	0.019|0.009|0.203	Cotton_D_gene_10030285	MARVSSSSAAEFPTNIGDKLSDVTIFTASGQPVLFKDLWDQNEGVAVVAFLRHFGCFCCWELASALKEAKPKFDSAGVKLIAVGVGTPDRARILAERVPFPMDSLYADPERKAYDVLGLYYGLGRTFFNPASAKVFSRLDKVKKAMENYTIKATPDDTSSVLQQGGMFVFKGKQLLYARKDEGTGDHAPLDDIFDVCCKTPVA	81.22	2e-122	gi|224127200|ref|XP_002320012.1|	predicted protein [Populus trichocarpa]	-
1402	Cotton_D_gene_10027701	27802.3	0.494	1|8|1	3|55|8	1.49	0.027	0.340|0.001|0.021	Cotton_D_gene_10027701	MAALQNSMPSLHHTLFTNSFPQRGLQKLSHGAFLCCKTSVPLHVRGEHLSSPPAAASSSSQFQDSCGRRRMIAVGIIAPLVSIVDRTPIAFAAETKKGFLPVTDKKDGYTFLYPFGWQEVVIEGQDKVFKDVIEPLESVSVNMIPTSKQDIRDFGSPQEVAETLIKKVLAPPTQKTKLIQAGEHDVDGKTYYTFEFVTQAPNYTRHALTAVSIGNGKFYTLTTGANERRWDKMKERLLTVVDSFKIFNV	70.28	3e-125	gi|225449633|ref|XP_002284256.1|	PREDICTED: putative oxygen evolving enhancer protein [Vitis vinifera]	-
1406	Cotton_D_gene_10000928	60485.4	0.187	4|4|3	12|7|4	1.48	0.012	0.001|0.061|0.056	Cotton_D_gene_10000928	MASSSSSLFRCFLHFFFFIISQVQAANLPFHPRDVLPLLPRQVSWPVLNSLNSPVDLLPSFVGSVSSSNRIVNWKGACFYENTAWVEFHNKTGSEFGGGTLHIKVSYPHSWTCMDLYVFATPYRVTWDYYFLSREHTLEIKEWQDKAEYEYVKNRGISIFLMQAGMLGTLQALWDVFPLFTNTGWGENSNIGFLEKHMGATFEERPQPWFTNISVDDVHSGDFLAISKIRGRWGGFETLEKWVSGAYAGHTAVCLKDSEGKLWIGESGHENEKGEDIIAIVPWDEWWDFELNKDDSNPHIAYLPLHPDVRAKFNETAAWEYALSMAGKPYGYHNMIFSWIDTIGGNYPPPLDAHLVASVMTVWSKIQPEYAANMWNEALNKRLGTQGLNLSDILVETEK…	85.46	0	gi|255563941|ref|XP_002522970.1|	conserved hypothetical protein [Ricinus communis]	-
1409	CotAD_08804	45085.7	0.143	2|-|-	10|-|-	1.28	-	0.001|-|-	CotAD_08804	MRRKIRKRTWRSKICSNEAVVGGGEKKWPGWPGESVFRMLVPAQKVGSIIGRKGEFIKKIVEETRARIKILDGPPGTTERAVMVSAKEEPDSSLPPAMDGLLRVHKRIVDGLEGDPSHTPTAVGTKVSTRLLVPASQAGSLIGKQGATVKSIQESSNCIVRVLGAEDLPVFALQDDRVVEVVAEAAGVHKAVELIATHLRKFLVDRSIIPLFEMHMQRSNHQMDHMPPHQSWGPPQGVPPNASRGSGYGHNPQYMPPPRQMDNYYPPADMPPHMEKQPHQGISAYGREVPMGAHGSSNPQNAPSMITQVTQQMQIPLSYADAVIGTAGASISYIRRASGATVTIQETRGVPGEMTVEISGTASQNFMAEAAAAPAQAQAGGVADQAYNPYAAHSSVYAS…	85.38	0	gi|255561873|ref|XP_002521945.1|	Poly(rC)-binding protein, putative [Ricinus communis]	-
1426	CotAD_24977	29357.2	0.506	4|4|4	74|75|77	1.2	0	0.001|0.001|0.001	CotAD_24977	MKYLSEKLNYSVETARQILGAKRQIGSSRKGSFVVKAASTPPVKQGADRPLWFASKQSLSYLDGSLPGDYGFDPLGLSDPEGPGGFIEPKWLAYGEIINGRYAMLGAVGAIAPEILGKAGLIPAETALPWFRTGVIPPAGTYNYWADPYTLFVFEMALMGFAEHRRFQDWAKPGSMGKQYFLGFEKYLGGSGEPAYPGGPLFNPLGFGKDEKSLKDLKLKEVKNGRLAMLAILGYFIQGLVTGVGPYQNLLDHLADPFNNNVLTNLKFH	87.69	6e-145	gi|356501755|ref|XP_003519689.1|	PREDICTED: chlorophyll a-b binding protein 3, chloroplastic-like [Glycine max]	-
1433	CotAD_41537	53393.9	0.28	6|5|8	20|21|27	1.4	0.002	0.001|0.001|0.001	CotAD_41537	MKKAELVFIPFPAKGHLVSTVEVAKLLVDLNSNLSISVLIIERTVDAESTAYADSLTAASTTTRIKFIHLPQPVQDTDAANFIRSVVQTHEPLVREAVTKIVEHSNSVPGSPRLAGFVLDLFCTSFRDLANDFGVPSYLFCTSGAGFLGFLFFIQALHDEQNFEFVELTDSETEFTIPSYVNSVSTKLFPSATFKPEGFGLFLSVAKQVREMKGIMVNTFLELESHAVDSLSNCKLPPVYPVGPILNTEGCSGVHQNYDSIMQWLDQQPRSSVVFLCFGSRGSFSANQVKEIACALEQSGFRFLWSLRRAPEQVNGKMGHPTDYENMAEVLPEGFLDRTAEIGKIIGWAPQSAILGHPATGGFVSHCGWNSTLESIWFGVPMATWPLYAEQQLNALQLV…	56.73	0	gi|255559108|ref|XP_002520576.1|	UDP-glucosyltransferase, putative [Ricinus communis]	-
1440	Cotton_D_gene_10030158	40700.4	0.271	1|2|-	1|13|-	1.35	-	0.745|0.001|-	Cotton_D_gene_10030158	MKVSVKTLKGTHFDIEVKPEDAVADVKKNIETVQGTDVYPASQQMLIYKGKVLKDDTTLAENSVTENSFIVIMLTKNKGTTGEGSAASTAPTKKDPEASNLPTAPAPASTAPVATSAMAAAAAESAPVASSTPLSDSDVYGQAASNLVAGSNLEGTIQQILDMGGGTWDRDTVVRALRAAYNNPERAVEYLYSGIPEQAEAPPVARAPVVGQTTNPAAQPQQPAQTAAVPTSGPNANPLDLFPQGLPNMGASGAGAGTLDFLRNSPQFQALRAMVQANPQILQPMLQELGKQNPNLMRLIQEHQGDFLRLINEPAEGGEGNILGQLAEAMPQAVQVTPEEREAIERLEAMGFDRATVLQVFFACNKNEELAANYLLDHMHDFQD	72.57	0	gi|356575534|ref|XP_003555895.1|	PREDICTED: putative DNA repair protein RAD23-3-like isoform 1 [Glycine max]	YLR167w_1
1454	Cotton_D_gene_10039158	53708.1	0.097	1|-|1	3|-|2	1.82	-	0.003|-|0.082	Cotton_D_gene_10039158	MSSSASPEIPQPKIVNGPGGYVLEDVPHLSDYIPDLPVYSNPLQDNPAYSVVKQYFVHVDDTVPQKIVVHKNSPRGVHFRRAGPRQKIYFDSDDVHACIVTCGGLCPGLNTVIREIVCGLFHMYGVKKVSGIDGGYRGFYAKNTVHLDPKVVNDIHKRGGTILGTSRGGHDTSKIVDSIQDRGINQVYIIGGDGTQRGASVIFEEIRRRGLKVSVAGIPKTIDNDIPVIDRSFGFDTAVEEAQRAINAAHVEAESFENGIGLVKLMGRYSGFIAMYATLASRDVDCCLIPESPFYLEGPGGLFEYIERRLKENGHMVLVIAEGAGQELLSESLQSMTQKDASGNRLLQDVALWISQRIKDHFSKERKMTINLKYIDPTYMIRAIPSNASDNVYCTLLAQ…	85.42	0	gi|255546259|ref|XP_002514189.1|	phosphofructokinase, putative [Ricinus communis]	STM4062
1456	CotAD_62868	67591.9	0.283	2|7|2	10|50|14	1.51	0	0.001|0.001|0.001	CotAD_62868	MAFPVVNSPPSNPVILPSSSIPTSCLPKTSQLFIFKMKKPFSKNLVSCKASNGNQNNEGSSSLNSFDRRDILLGLGTLYGATNLVSDPFALAAPIAAPDLSLCENSTVTSSSSGTSISVPCCPPKTTNILDFKPPRFSTIRLRPAAHLVDANYLEKFTKAIELMKALPDDDPRSFKQQANVHCAYCNGAYDQVGFPDQQLQVHFSWLFFPFHRLYLYFYERILGKLIGDPNFAMPFWNWDSPPGMAIPKIYVDPNSPLYDEKRNVNHQPPNMLDLDYAGTEEELSKRDQIKSNLSVMYRQMVTYKTASLFFGAAYRAGDDPSPGMGSIENNPHTAVHRWVGDKRQPFSEDMGNFYSAGRDPLFFAHHSNVDRLWSIWRTLPGKKRTDFTDTDWLDSSFL…	99.48	0	gi|378747844|gb|AFC36521.1|	polyphenol oxidase [Gossypium hirsutum]	-
1458	Cotton_D_gene_10038149	32968	0.122	3|3|3	40|49|48	1.98	0.002	0.001|0.001|0.001	Cotton_D_gene_10038149	MASRSCLYVVLLLLAFQSTVIKATVPVVPPQCRPVPAGTLARIEFLANLVIGVAEFFLRSSNGTGIEDIAPGLVQGPVPIGATLATLDNATRAAVRQFGLALVGNLRAIVNVTSLRAPLPRPQLNFTAGVFANILNLSALTPPFNVYGGQTQFFLVAEPLTSSLIQYYLAQVIPSIAGIPQQQLVTGIGLNAAAQHGYFRTRLNAIVNITVPPYTITVASFTNTTATAVNLLGLCGVKNEGLIVPLPLGAENRTTTNVIPGDVNSLSPRRTERETLRILHGTGNATRPGGIFPSGPNGTLYRLVIVPLRLS	39.85	5e-49	gi|449436521|ref|XP_004136041.1|	PREDICTED: desiccation-related protein PCC13-62-like [Cucumis sativus]	-
1461	Cotton_D_gene_10002138	58130.8	0.277	1|1|-	3|9|-	1.41	-	0.197|0.002|-	Cotton_D_gene_10002138	MMRFSLQKVKNLPALRPQVLASASPRFSTATESSFNHRNPSRVPNLIGGAFVDSKSTSTIDVINPATQEVVSQIPLTTNEEFKAAVAAAKQAFPSWRNTPITTRQRIMFKLQELIRRDMDKLAKNITTEQGKTLKDAHGDVFRGLEVVEHSCGMATLQMGEYVPNVASGIDTYSVREPLGVCAGICPFNFPAMIPLWMFPVAVTCGNTFVLKPSEKDPGASIMLAELAIEAGLPPGVLNIVHGTNDIVNAICDDDDIRAISFVGSNTAGMHIYGRASAKGKRVQSNMGAKNHGIVMPDANKDATLNALLAAGFGAAGQRCMALSTIVFVGDSESWLNDLVERAKGLKVNAGIEPNADLGPVISKQAKERICRLVQSGVERGAKLLLDGRNVVVPGYEQG…	86.48	0	gi|255554609|ref|XP_002518343.1|	methylmalonate-semialdehyde dehydrogenase, putative [Ricinus communis]	BH0995
1469	CotAD_38942	38987.4	0.166	2|1|2	6|4|7	2.66	0.257	0.001|0.001|0.001	CotAD_38942	MAGLNPFDLLGDDDTGELSLLIAAQQKAVAAATATAAAPRKSPAKPQAKTLPATQAKLPSKPLPPAQAVREAKNEGAHGGGRGGRGYGRGRGGSSGYRRDFANDENSFSSSAVPEDGESGKPSERHGYGGPRPYRGGRRGGISNGENADGERPRRLYERRSGTGRGNELKREGSGRGNWGTQSDNLAQVTEEVTNEGERNLGDEKPAGEEDARDANKESASNEPEEKEPEDKEMTLEEYEKVLEEKRKALQALKIEERKVDAKEFESMQQLSNKKSNDEVFIKLGSDKDKRKEAYEKEERAKKSVSINEFLKPAEGERYYNPSGRGRGRGRGSRGFGGGSAARDVAAPSIEDPGHFPTLGGK	65.95	1e-100	gi|359489211|ref|XP_002272562.2|	PREDICTED: uncharacterized protein LOC100259885 [Vitis vinifera]	-
1471	Cotton_D_gene_10015772	11739	0.082	1|1|1	14|6|8	2.19	0.054	0.001|0.005|0.001	Cotton_D_gene_10015772	MSVRYVSRRFSSGSGKILSEEEKAAENIYIQKTEREKLEKLARKGPKPEEKPDAGSGGAATDGSTTSTSGTSAEKVSTDKYRNYGVLAGVATLGAAVGWYLNSKDKKQEA	68.18	8e-28	gi|462401804|gb|EMJ07361.1|	hypothetical protein PRUPE_ppa013568mg [Prunus persica]	-
1472	Cotton_D_gene_10030567	30873.6	0.278	1|1|2	2|7|8	5.17	0.842	0.012|0.004|0.007	Cotton_D_gene_10030567	MAKHSAEVVVEGLKKILLNVQEELDEKVQSKVEKLIAELQGREHHHHPPPPPPCDHDAQRLDDGFHFFKTNIFDKNRECFKKLAEDQHPKYLVFACSDSRVSPSTIFNLMPGRAFVSRNIANMVPPFDQLRHTETGAVIEYAIKALKVRNILVIGHSRCGGVERLMNLPDDSDSHTYDFIDDWVKIGLPAKKKVLEENSGLPSEEQLKLCEKESVNNSLGNLLTYPYVRDAMTSGQLALRGGYYDFVNGHFEQWRAFTPAPPLPPMPQPF	58.43	8e-97	gi|357461991|ref|XP_003601277.1|	Carbonic anhydrase [Medicago truncatula]	RSc0277
1474	CotAD_54142	38637.3	0.294	7|1|1	19|2|4	1.46	0.003	0.001|0.001|0.001	CotAD_54142	MDPRGGDAIPDGETNDFRSSDHPDDDKSHPHTGDGASPGKIFVGGLARETSSAQFIEHFGKYGEITDSVIMKDRKTGQPRGFGFVTYAEPSVVDKVIEETHIINGKQVEIKRTIPKGAAGSKDFKTRKIFVGGIPSTVSEDEFKDFFTQYGVVREHQIMRDHATNRSRGFGFITFETEQAVDDLLEKGNKIEFAGAQVEIKRAEPKKPNPPPPPSKRYNDSRTAYGGGFGDGYGRYGGGGFGGGYNRSSGAYGGRAGGYGAYGGGEFGSYGGYGGGGSGGMGPYRGEPSLGYSGRYGGNFNRGYDMGSGYGGPGEFYGGYGAGAAAGGYGSSYDAGLGGGYGGGAAGGSSFYGSRGGYSGAGSGRYHPYGR	79.91	2e-108	gi|296087606|emb|CBI34862.3|	unnamed protein product [Vitis vinifera]	alr2087
1478	Cotton_D_gene_10028267	30747.5	0.194	5|-|5	28|-|29	1.26	-	0.001|-|0.001	Cotton_D_gene_10028267	MAVVDCPSIKMAGPAPFVDLGKKAKDLLTKDYNFDQKFTLSMLSTTGMGLTATGLKKDQNFFGDINTVYKSGNTTVDMKVDTYSNVSTKVTVNDVWPCSKAALSFRIPDHKSGKLDVQYLHPHAAIDSSIGLNPTPLLELSATIGSKELALGGEIGFDTASASFTEYTAGINLNKPDFSVALLLTDKGQALKASYIHSVNPFTCVAAEMAHRFSTYENTFTIGSSHAVDPFTVVKTRFSDNGKVAMLCQREWRPKSLVTFSAEYDSKAINASPKMGLALALKP	79.04	3e-159	gi|462419446|gb|EMJ23709.1|	hypothetical protein PRUPE_ppa009817mg [Prunus persica]	-
1486	CotAD_29976	42442.5	0.285	-|11|-	-|50|-	1.64	-	-|0.001|-	CotAD_29976	MAQSTVSQVSVAVPVGNDISLRRSVANRNIISFGNKSWASTLAFDLKSRNAQKNKPYIVCLSVQQASKSKIAVSPLELEIAKEPPLNTFKPKEPYTATIVSVERLVGPKAPGETCHIVIDHGGNVPYWEGQSYGVIPPGENPKKPGSPHNVRLYSIASSRYGDSFDGKTTSLCVRRAVYYDTETGKEDPSKSGVCSNFLCNCKPGDKVQITGPSGKIMLLPEDNPNANHIMIATGTGVAPFRGYLRRMFMEDVTFKFKGLAWLFLGVANKDSLLYDDEFTKYLKDYPDQFRYDLALSREQKNKSGGKMYVQDKIEEYSDEIFKLLDDGAHIYFCGLRGMMPGIQETLKRVAEQRGENWDEKLSQLKKNKQWHVEVY	85.08	0	gi|255564389|ref|XP_002523191.1|	ferredoxin--NADP reductase, putative [Ricinus communis]	PA4513_2
1497	CotAD_06641	54550.5	0.128	1|1|4	2|1|16	1.33	0.013	0.282|0.781|0.001	CotAD_06641	MGSDLLSQTKPIPIPTQEEDPSSQSTALLSFNTDSCLDPSTKASPSRASTTIIFIALTLLACIALSAALAFAFLFYSSSSPSSSFSATLHNISRPLKKLEKPVVILISSDGFRFGYQFKTSTPNIHRLIANGTEAETGLIPVYPTLTFPNHYSIVTGLYPAYHGIVNNHFVDPKTGEVFNMRSHEPKWWLGEPLWETVANHGLKASTYFWPGSEVKKGSWDCPKNFCMFYNGSVPFEDRVDTVLSYFDLPSSEIPVFMTMYFEDPDHQGHQVGPDDPEITEAVARIDGLIGRLIAGLEKRGIFEDVTIIMVGDHGMVGTCDKKLIFLDDLAPWINIPGDWVQYYSPVLSIRPPPGYAPSDVVAKMKEGLESGRVDNGKHLRVYLKEELPSRLHYAESDR…	78.3	0	gi|225444938|ref|XP_002282308.1|	PREDICTED: ectonucleotide pyrophosphatase/phosphodiesterase family member 3 [Vitis vinifera]	lin1457
1501	CotAD_71665	52497.2	0.062	-|-|3	-|-|5	2.11	-	-|-|0.045	CotAD_71665	MDYKAAGLYTLDEALETVGFGKFQGFVLGYAGLGWFAEAMEIMILSFIGQAVKSEWQLSSGQESLLSTIVFAGMLLGANTWGLLSDNYGRRKGFLTISMVTFGAGLLSTFSPNYLTLVLLRGLVGFGLGGSSVFLSWFLEFIPASNRGMWMVVFSTFWTFGSIFEAALAWIVMPRLNWRWVLAFSAVPSFALLILYGVAPESPRYLCMKGNTSDALRILEKIASVNQTKLPPGVLLSGRSNDKDEESSPSENTAPLLPSLSKTTTQSKSGFSSFFMLFSSKLIRTTLLLWVLFFGDSFSYYGIILLTSKLSSGQSTCFPSLQSNINPQDDGLYLNAFITSMAELPGLLLSAILVDRVGRKQSMAIMFGLAFIFLSPLLIQQPAVLTTCLLFGARMNAMG…	98.34	0	gi|383932368|gb|AFH57281.1|	MFS [Gossypium hirsutum]	HI1104
1504	CotAD_28973	61326.6	0.162	1|7|6	1|22|26	1.62	0.148	0.812|0.001|0.001	CotAD_28973	MAVFLATTVSTTRIASSFIASSQTSKPQAFISPTKNNLAPRRITRLKPPHVAAPSSAVAPSPDQKQDEEYRVSDEFSEESSDAKFSWKDHWYPVSLVEDLDPTLPTPFQLLGRDLVLWFDKSKNQWVAFDDKCPHRLAPLSEGRLDENGHLQCSYHGWSFDGCGSCTRIPQAASQGPEARAVQSPRACATVFPTMVSQGLLFVWPDENGQERASATKPPMLPDDFKKPEFATVNIQRDLFYGYDTLMENVSDPSHIDFAHHKVTGRRDRAKPLPFKVDSSGPWGFGGSNDDNPKISSKFIAPCYYINKIEIDTKLPIVGEQKWKIWICSFNVPMAPGKTRSIVCSARNFFQFTVPGSAWWQVVPRWFEHWTSNKVYDGDMIVLQGQEKIFLSKSMESSE…	81.05	0	gi|462403848|gb|EMJ09405.1|	hypothetical protein PRUPE_ppa019738mg, partial [Prunus persica]	SMa2117_1
1507	Cotton_D_gene_10006533	44976.8	0.093	3|2|3	9|8|12	1.61	0.004	0.001|0.001|0.001	Cotton_D_gene_10006533	MEESPELLNPQVNQKKYGVMLKSDQGASGVGIGNFEEIGPLNTDLKPRNTTWLKKADLLFVDNPVGTGYSYVEDTEMLVKTDNEAASDLTTLLMKLFNTIESLQKSPLYIVAESYGGKFAVTAGLSILNAIDAGKLKLKLGGVALGNSWISPEDFAFSWGPLLKDVSRLDNNGLEKSNSLAEKISQQLKDGQYTDATDTWSRLESVIGANSNSVDFYNFLLDSGMGPVALTTSAFSNGVFSVNRYSRYLSSLRVSPGNDGPDLDTLMNGVIKKKLKIIPDNVTWGGQSDFVFSYLSGDFMRPRIAEVDELLSKGVNVTIYSGQLDVICATKGTQAWLDKLKWEGLKEFLSKDRNPLYCKEDQATKGFIKSYKNLQFYWILGAGHFVPVEQPCVALNMAA…	74.87	0	gi|297734883|emb|CBI17117.3|	unnamed protein product [Vitis vinifera]	SPAC1296.03c
1509	CotAD_46339	27237.2	0.203	4|1|4	6|2|7	1.93	0.013	0.025|0.077|0.003	CotAD_46339	MNPPKELHSPASLTSSNKPKLPNQIINHFLSSNPNNAFSMGFGSSACFAYAPTENRFPSHQRLFCGVDEIYCIFLGDLNNLSSLLKQYGLSKGTNEAMFIIEAYRTLRDRGPYPADQVLKDLEGSYGFVVYDSKAGSVFAALGADERVNLYWGVAADGSVVVSDNLKLIKESCAKSFAPFPPGCMFHSEQGLMSFEHPRSKMKAMPRIDSEGVMCGANFMADAQSRTSRMPRVGSEANWALRGSKA	76.83	5e-142	gi|255556005|ref|XP_002519037.1|	Stem-specific protein TSJT1, putative [Ricinus communis]	-
1540	CotAD_26296	35744.5	0.261	1|1|1	1|2|4	2.17	0.064	0.151|0.001|0.008	CotAD_26296	MAATFFRRLSKATPATFNNAFRGQPKSGFAGFRFTTIAAVAGGISTYYCFSDSNLVHLDQVNEETGPKVALKSDKWLEFKLQDTARVSHNTHLFRFSFDPSAKLGLDVASCILTRAPLGQDAEGKTKYVIRPYTPISDPDAQGYFDLLIKVYPEGKMSQHFASLKPGDVVEVKGPIEKLRYSPNMKKHIGMIAGGTGITPMLQVIEAILKNPDDKTQVSLLYANVSPDDILLKQKLDILAASHPNLKVLYTVDNPTKTWKGGAGFISKDMVTKGLPGPAADTLILVCGPPGMMEHISGGKAKDYSQGELTGILKELGYTEQMVYKF	81.6	0	gi|225445442|ref|XP_002285073.1|	PREDICTED: NADH-cytochrome b5 reductase-like protein [Vitis vinifera]	MT1987_1
1545	CotAD_58616	47428.4	0.071	3|2|1	5|4|1	1.52	0.037	0.047|0.045|0.361	CotAD_58616	MGFPSILSRIAISRNLLSSKPTNPTILLSSRWFSNLVANNIDKAERSLPSSSAAYHVSSGGYMRGTVFWEPDTPLTIEEFHMPRPKAGEVLIKTKACGVCHSDLHVIKGEIPFSSPCVIGHEVTGEIVEHGPLTDRKIIERFPIGSQVVGAFIMPCGNCFFCSKGHDDLCEDFFSYNRAKGTLYDGETRLFLRNSGKPVYMYSMGGLAEYCVIPAHGLAILPKSLPYTESAILGCAVFTAYGAMRHAAEVCPGDSIAVIGVGGVGSSCLQIAKAFGASLVIAVDIQNDKLQKAKTLGATHTVNAIEEDAIERIKEITGGPGVDIAVEALGKPQTFLQCLQSVRDGGKAVMIGLSKAGAIGEVDINRLVRRKIRVIGSYGARARQDLPKLVKLAETGIFN…	76.31	0	gi|255544387|ref|XP_002513255.1|	alcohol dehydrogenase, putative [Ricinus communis]	NMA1518
1546	Cotton_D_gene_10001437	37744.9	0.091	2|-|2	19|-|8	1.64	-	0.001|-|0.001	Cotton_D_gene_10001437	MAVLLKTLPFKSTPLPPLSPSLRPISLNSPRPFYVCFKQRLPRTPGALWFSSSPSLRFVKLVPFASNGGETETAETQEEVEEPQIEDSSDGAVSVEEDTTGDESNDFEDAPSSTIVSLLQTYKEALASNDESKVADIEAFLNSIEDEKVDLEKKMASLSEELSIEKDRVLRISADFDNFRKRTERERLSLVSNTQGEVLENLLPVLDNFERAKAQIKIETEGEEKINNSYQSIYKQLVEILGSLGVEPVKTVGNLFDPMLHEAIMREDSTEFEEGIILQEFRKGFKLGERLLRPSMVKVSAGPGPAKPEQGESLESTEKGESNEGGESSGSSETDPGTAETS	74.02	2e-132	gi|255580248|ref|XP_002530954.1|	Protein grpE, putative [Ricinus communis]	Cj0758
1548	CotAD_66845	18783.5	0.063	1|-|-	2|-|-	2.24	-	0.021|-|-	CotAD_66845	MRGTSVLSWILIICVCQVAVRSQYYSDTLPYQPRPVLVTNLHFYMHEFTGTTAVVLTQANITSNNSSVPFATLVAVNDPLRTGPEPDSELIGNVQGISLLAGSNASSTQYIEFGFNTGKFNGSSLSVFSRGDPGLAVVGGRGQFAMATGTALFNPILINATNVIIEFNFTVIHY	97.13	6e-122	gi|66276977|gb|AAY44415.1|	dirigent-like protein [Gossypium barbadense]	-
1567	CotAD_17205	37437.2	0.33	7|8|8	36|32|29	3.02	0.031	0.001|0.001|0.001	CotAD_17205	MKIYPAFLSFLFISIFISPSVSDHCNAQDKKVLLKIKKALGNPYLLASWDPNTDCCDWYCLECHPNTHRVVSLTLFSDDRLTGQIPPEVGDLPYLETLLFRHLPNLNGTIQPAIAKLKNLKTLRLSWTNLSGPVPNFLSQLKNLTYLDLSFNNLSGSIPSSLSTLPNLEALHLDRNKLTGTIPESFGMFPSKNLYLFILSHNKLSGTIPASLANMDFNTIDLSRNLLEGDPSVLFGPKKTTFEIDLSRNMFQFDLSKVQFPKSLARLDLNHNKITGSIPAGLTDLELQFMNVSYNRLCGQIPVGGRLQSFDYSTYFHNRCLCGAPLDTCK	97.88	0	gi|33469564|gb|AAQ19807.1|	polygalacturonase-inhibiting protein [Gossypium barbadense]	alr0124_1
1575	Cotton_D_gene_10013730	15044.7	0.624	4|3|3	92|63|56	1.39	0	0.001|0.001|0.001	Cotton_D_gene_10013730	MATSSMASAASGFLLTPNVAANSSSTSKTTTVFFPSKNNNNSRLVVTRAADEAAARAPATTTAASEGGEAPKPKPPPIGPKRGTRVKILRRESYWYNSFGSVVTVDQDPKTRYPVVVRFNKVNYANVSTNNYALDEIAEVN	67.94	3e-38	gi|255560287|ref|XP_002521161.1|	photosystem I reaction center subunit IV A, chloroplast precursor [Ricinus communis]	-
1577	Cotton_D_gene_10016840	25787.4	0.401	9|7|7	66|71|83	1.2	0.001	0.001|0.001|0.001	Cotton_D_gene_10016840	MSSQIFRSASRAARSLLSASKASRFYSEGRAVAAAAAVSLGGKVPLLASAYGSTASANASRAWLSGVFALPVAAYMLQEQEVHAAEMERTFIAIKPDGVQRGLISEIISRFERKGFKLVAIKLVVPSKEFAQKHYDDLKERPFFNGLCEFLSSGPVLAMVWEGEGVIKYGRKLIGATDPQKSEPGTIRGDLAVVVGRNIIHGSDGPETAKHEINLWFKPQELVNYTSNAEKWVYGNN	81.43	4e-129	gi|224058260|ref|XP_002299472.1|	predicted protein [Populus trichocarpa]	DR2499
1608	CotAD_18322	27526.1	0.235	5|5|4	8|8|8	1.84	0.01	0.001|0.001|0.001	CotAD_18322	MATETVESLPPTLEANAEQPPLFDGTTRLYTSYPCPFAQRVWITRNYKGLQDEIKLVPLNLQNRPAWYKEKVYPVNKVPSLEHNGKIIGESLDLIKYVDSNFEGPSLVPNDPDKKRTLEELLSYTDKFMEMLFASFKGDPEKEAGAAFNYLEDALKKYDDGPFLLGRDFSLADIAYIPFVERFQIFLSEVFKYDTIAGRPKLAAWIEELNKIDAYKQTKTVDPKQLVEYYKQRFMAQK	78.35	9e-132	gi|284433794|gb|ADB85103.1|	glutathione S-transferase omega [Jatropha curcas]	mll0063
1610	Cotton_D_gene_10032343	64521.6	0.134	4|-|-	10|-|-	1.22	-	0.012|-|-	Cotton_D_gene_10032343	MEASYDPEQNPPLHAPLLDRSSPRTRRFAAIFACLVSLLLLLALILNQAQQPFEKVQPRGVGEGPLYHKGWYHLFYQYNPYSAIWGNITWGHAVSRDLIHWLYLPLALVPDHWYDIKGVWTGSATILPDGQIIMLYTGETNESVQVQNLAYPANVSDPLLLHWLKYPGNPVMVPPPGVKPDDFRDPTTAWLGPDGTWRLTMGSKFDTTIGISLVYHTTNFRDYELLDGVLHAVPGTGMWECVDFYPVAINGSVALDTSSLGPGIKHVLKASLDNTKVDHYAIGTYDPITDKWTPDNPEEDVGIGLKVDYGRYYASKTFFDQHKQRRVLWGWINETDTETADLKKGWASLQTIPRTVLYDNKTGTNLLQWPVEEVESLRLNSTMFKEVLVEPGSVVPLDI…	92.23	0	gi|268526570|gb|ACZ05614.1|	vacuolar invertase 2 [Gossypium hirsutum]	YIL162w
1615	CotAD_57620	37561.3	0.471	7|7|1	41|50|4	1.89	0.013	0.001|0.001|0.001	CotAD_57620	MNAVAQIGVCYGMLGNNLPNAREVINLYKSNNIKRMRLYDPNQQALQALRGSNIEVILGVPNDQLQNLANPSKAQSWVRSNVVAYWPSVRFRYIAVGNEVPPSSSLARFVLPALVNVFNAVRSAGLESQIKVSIAIDMTLIGVSYPPSAGAFRGDVRSYLDPIIGHLAWARTPLLANIYTYFSYSGNPRDISLPYALFTSPSPIVWDQGRGYQNLFDAMLDSLYSALEKAGQGGLEVVVSESGWPSAGGFGTSVDNAATYLSNLIKHVQKGTPKRPGKAIETYLFALFDENQKSGPELERHFGLFLPNKQPKYQLRFGGGRHWDIASKEYNATFPLKYDM	77.42	0	gi|118489363|gb|ABK96486.1|	unknown [Populus trichocarpa x Populus deltoides]	-
1617	Cotton_D_gene_10022882	25546.7	0.257	2|1|3	4|1|5	1.65	0.139	0.004|0.338|0.162	Cotton_D_gene_10022882	MSSALEMSLDDLIKRSRKSGSGNSRGRGRGSTAGPARRIPNRRANRSAPYTAAKAPETMWQHDMYSDKGSALQGQAGRASAIETGTKLYISNLDYGVSNDDIKELFSEVGDLKRYGIHYDRSGRSKGTAEVVFSRRTDAMAAVKRYNNVQLDGKPMKIEIVGTNIATPTAPSAANGTFGSSNGAPRGGQGRGGGFGRQRGGAGGRGFGRGRGQGKGRGEKVSAEDLDADLEKYHSEAMQTN	73.66	3e-89	gi|225435024|ref|XP_002284215.1|	PREDICTED: RNA and export factor-binding protein 2 [Vitis vinifera]	YDR381w
1618	Cotton_D_gene_10033182	35462.9	0.314	8|7|7	40|36|38	1.29	0.003	0.001|0.001|0.001	Cotton_D_gene_10033182	MAATDSPLTTKVCIIGSGPAAHTAAIYAARAELKPILFEGWMANDIAPGGQLTTTSDVENFPGFPDGIMGSELMERCRNQSLRFGTTIFTETVNKVDFSSSPFKIFADSKTVLADSVIVATGAVAKRLNFPGSGDGLGGFWNRGISACAVCDGAAPIFREKPLAVIGGGDSAMEESTFLTKYGSKVYIIHRRDTFRASKIMQNRVISNPKIEVIWNSVVVEAYGDRVLGGLKVKNLVTEEVSDLKVNGLFFAIGHEPATKFLGGQLELDSDGYVVTKPGTTQTSVHGVFAAGDVQDKKYRQAVTAAGTGCMAALEAEHYLQELGSQEGKSD	88.96	0	gi|462397677|gb|EMJ03345.1|	hypothetical protein PRUPE_ppa007040mg [Prunus persica]	STM0958
1637	CotAD_68431	33590.6	0.231	-|-|3	-|-|5	1.61	-	-|-|0.001	CotAD_68431	MATFKQLYLRKVFILVSIILLVSVILVLGVSSATWNKVSSDHYSLQFYDFEIVNEFPHDSTAFTQGLLYAGNDTLFESTGLYRQSSVRKVAIRTGKVEILHKMADSYFGEGLTLLGERLFQVTWLTKIGFIYDRKKLQKLEQFTHEMEDGWGLATDGKILYGSDGTSTLYQIDPQTLKVTTKNVIKFNGQNVRYLNELEYINGEIWANVWQTDCIIRISPNNGTILGWILLPSLREGLLAAGYNGIDVLNGIAWDSDNNRIFVTGKLWPKLYEIKLHPAKKHYNIEDIEKLCLA	73.6	5e-137	gi|462415159|gb|EMJ19896.1|	hypothetical protein PRUPE_ppa008785mg [Prunus persica]	SPy0505
1640	CotAD_39893	38327.3	0.418	14|13|12	128|112|121	2.1	0.006	0.001|0.001|0.001	CotAD_39893	MAKATSFTAFLLMSSLFLSSHFSVSKADNSAPIVSGLSWTFYKTSCPKVESIIRKQLQKVFKKDIGQAAGLLRLHFHDCFVQGCDASVLLDGSASGPSEQDAPPNLTLRGFEIINDLRARVHKECGRVVSCADIAALAARDSVYLSGGPDYDVPLGRRDGLSFATRNATLQNLPAPFANATAILSSLATKNFDPTDVVALSGGHTIGISHCSSFTGRLYPTQDPTMDQTFAKNLKQVCPTANSSNTTVLDIRTPNKFDNKYYIDLMNRQGLFTSDQDLYTNSRTRGIVTSFAVNQTLFFEKFVAAMVKMSQLSVLTGKAGEIRANCSVRNANNNSLLASVVEEEARSEY	81.65	0	gi|224066611|ref|XP_002302162.1|	predicted protein [Populus trichocarpa]	-
1641	CotAD_60079	44497.4	0.186	1|1|5	2|2|37	1.41	0.019	0.262|0.265|0.001	CotAD_60079	MVQPSSTFVNINKKNLWVSLAIAVLSLCFVPINVSAAVRRHPPQQHHLSRKPSPKLRFGRNGEFKILQVADMHYADGKTTPCEDVLPSQVDGCSDLNTTAFIHRMIEAEKPNFIIFTGDNIYGFDSKDSAKSMDAAFAPAIAARIPWAAVLGNHDQEGTLSREGVMKHIVGLNHTLSQFNPSELHVIDGFGNYNLEVGGVEGSDFVNKSILNLYFLDSGDYSTVPAIPGYGWIKPSQQLWFQRTSAKLRRAYMSPPNAQKSSAPGLVYFHIPLPEVASFDSTNFTGVRQEDIGSASVNSGFFTTLVEAGDVKAVFTGHDHVNDFCGQLTGIQLCYGGGFGYHAYGKAGWPRRARVVVASLEKTEEGGWGTVKSIKTWKRLDDKHLTAIDGEVLWSKKHT…	76.7	0	gi|118484121|gb|ABK93944.1|	unknown [Populus trichocarpa]	YOR137c
1654	CotAD_03667	52689.7	0.148	1|1|1	10|10|8	1.18	0.009	0.726|0.141|0.020	CotAD_03667	MGLQRSAMAMLLLMMFTLSSALDMSIISYDEGHPDKSKSSWRTDDEVMVMYEEWLVKHGKAYNGLGEKERRFKIFKDNLRFIDEHNANESHSFKVGLNRFADLTNDEYRAMYLGTKKSSNKVSKKSNRYAPRVGEELPASIDWREKGAVVPVKDQGSCGSCWAFSTVGAVEGINQIVTGDLISLSEQELVDCDTSYNEGCNGGLMDYAFEFIIKNGGIDTEEDYPYTGHDGRCDSYRQKTAKVVTIDSYEDVPQNNEGALKKALASQPVSVAIEAGGRAFQLYASGIFNGLCGTQLDHGVVAVGYGTENGKDYWIVRNSWGNQWGEEGYIRMERNLANTATGKCGIAIEASYPIKNGQNPPNPGPSPPSPIKPPTVCDNYYSCPESNTCCCVYEYYGYC…	77.55	0	gi|224136808|ref|XP_002326950.1|	predicted protein [Populus trichocarpa]	MA1660_1
1656	CotAD_48138	32522.5	0.179	2|3|4	3|9|6	1.63	0.071	0.153|0.002|0.001	CotAD_48138	MATIYHLATLMLFCFIQLSFSELVQEQPLVLKYHNGPLLKGKITVNLIWYGKFTPIQRSIIVDFINSLNSDKATMVPSTSSWWKITKKYKGGSSTLAVGKQILLENYPLGKFLKNPHLRALASKFNGVDTINVILTSKDVAVEGFCMRCGTHGSTRVGRGPVRGTYIWVGNSETQCPGQCAWPFHQPIYGPQTPPLVAPNGDVGVDGMIINLATLLGNTVTNPFNNGYFQGPANAPLEAVSACTGMFGSGSYPGYPGKVLVEKSTGASYNANGINGRKYLLPAMWDPQTSTCKTLM	77.93	2e-166	gi|224055948|ref|XP_002298705.1|	predicted protein [Populus trichocarpa]	-
1662	Cotton_D_gene_10039753	54477.1	0.181	7|6|7	22|21|20	1.58	0.012	0.001|0.001|0.001	Cotton_D_gene_10039753	MEDAIRFIFFSFLLIPANTQLESNQKGYISAVISTKGLDFAKDLLIEKAVSSIIPLQLSDIEKSAKIPVVGKVRMGLSDIVIYSVDFPFSSVATGDSGIVLVASGATANLNMKWKYSYKTWIVTISDQGTATVEVLGMVVWLKAAVINEEGTLKLFLLDYECHVKDISINVDGGASWLYQGIIDAFRGKIMSEVEDAIIKKIKEGMIKLDSLLQSLPKQLQVNSVVALNVTFMDDPLLTNSSVELEINGLFNGADEISVSNYYSKRARNFLSCNGLAKMVEISLHEKVFQSAGSVYFHADHMHWTLNKIPESLTNTAGWRYIIPQLYEQYPNDDMKLHVTVTSPPVIRIADHDVDTTIYADLTFEVLDSSEVVPIACISLVISTSCSAEIHRNNLTGSI…	55.86	0	gi|462407692|gb|EMJ13026.1|	hypothetical protein PRUPE_ppa004478mg [Prunus persica]	-
1673	Cotton_D_gene_10011941	16807.4	0.233	1|1|1	1|2|3	2.09	0.177	0.201|0.166|0.021	Cotton_D_gene_10011941	MAASQKNAQQTTNGKLWNSSSEAITLTDKKVWQGSHYADFPEIIEDGDAREFTHESVTDDADSHGSVAGLVYRRRDGTKWVVAWSNPLDENSKVYTDIQRQPIHWGQIKTDLEKRGKPKFKVTKFGYVASIEIDAGSRSPTMKASFELEA	28.66	6e-11	gi|326497085|dbj|BAK02127.1|	predicted protein [Hordeum vulgare subsp. vulgare]	-
1688	CotAD_55536	23658.4	0.04	1|-|-	3|-|-	1.9	-	0.003|-|-	CotAD_55536	MKTPEATVTGKSNIPSDSSKKGSLEKKTSPTATFPNGFEALVLEVCDETEVAELKMKIGDFEMHLKRNVGATKGPLSNISPTTAPPIPTVPMNESVAAALPPSPPKPAAEKVTPFKNINVGKSSKLAALEASESNNYVLVPSPIVGTFRRGRTVKGKKQPPICKEGDLIKEGQVIGFLDQFGTELPVKSDVAGEVLRLLFDDGDGVGYGDALIAVLPSFHPIN	71.11	2e-93	gi|462415226|gb|EMJ19963.1|	hypothetical protein PRUPE_ppa009474mg [Prunus persica]	MJ1231_2
1689	Cotton_D_gene_10038658	26889	0.282	2|1|1	6|1|1	1.22	0.136	0.046|0.781|0.507	Cotton_D_gene_10038658	MADSAVALEDVASVDIMTELLRRFKCSSKPDKRLILIGPPGSGKGTQSPMIKDDYCLCHLATGDMLRAAVAAKTPLGIKAKEAMDKGELVSDDLVVGIIDEAMKKPSCQKGFILDGFPRTVVQAQKLDEMLGKQGAKIDKVLNFAIDDSILEERITGRWIHPSSGRTYHTKFAPPKVPGLDDVTGEPLIQRKDDTPAVLKSRLEAFHRQTEPVIDYYGSKGILANLPAEKPPKEVTSEVQKVLSS	90.91	3e-163	gi|449469623|ref|XP_004152518.1|	PREDICTED: adenylate kinase B-like [Cucumis sativus]	STM0488
1695	CotAD_54220	29624.3	0.409	3|2|1	17|7|3	1.44	0.042	0.001|0.001|0.699	CotAD_54220	MGKGPGLYSDIGKKARDLLYKDYQVDHKFTVTTYTSNGVAITSTGTKKGDLLLADVNTQLKNKNITTDVKVDSRSNLFTTVTIDEPAPGLKTIFSFVVPDQKSGMVELQYRHEYAGISTGIGLTAKPLVSFSGVIGNDCVSVGTDLSFDTASGNFIKLNAGLNITHSDLIASMTLNDKGDTLTASYYHIVSPLTNTAVGAELTHSFSSNENTLTIGTQHALDPLTTVKARMNNYGRASALIQHEWHPKSLFTISGEVDTRAIEKSAKVGLALALKP	85.51	2e-175	gi|449458029|ref|XP_004146750.1|	PREDICTED: mitochondrial outer membrane protein porin of 36 kDa-like [Cucumis sativus]	-
1712	CotAD_68706	23981.4	0.095	2|2|2	7|6|5	1.42	0.009	0.001|0.081|0.008	CotAD_68706	MAGKEENRIFVGGLSWDVTERQLEHAFSPFGKILESQIMLERDTGRPRGFGFITFADRRSMDEAIREMHGRELGERTISVNKAQPKMGEDLDHGYRGGYSSSGRGRYAGGDRPVAQDECFKCGRFGHWARDCPSAGGGRGGSGGMFSSRSRYGGADDRGDRFRDRDRYIDDRYDGGRYGDRDRFDSRDDRXRSKVTKVYYQGSRKFLPSF	82.09	4e-65	gi|224109842|ref|XP_002315330.1|	predicted protein [Populus trichocarpa]	VC0159
1717	CotAD_04315	39382.4	0.193	-|5|-	-|13|-	1.22	-	-|0.001|-	CotAD_04315	MGSLETERTTTGWAARDPSGVLSPYTYTLRNTGPEDVFVKVMCCGICHTDLHQAKNDLGMSNYPMVPGHEVVGEVLEVGSDVSKFRVGDIVGVGCLVGCCRNCRPCDSDNEQYCLKKIWSYNDVYTDGKPTQGGFAGSMVVDQKFVVKIPEGMAPEQVAPLLCAGVTVYSPLNHFGLMGSGLRGGILGLGGVGHMGVKIAKAMGHHVTVISSSDKKKVEALEHLGADDYLVSSDAEGMQKAADSLDYIIDTVPVFHPLEPYLSLLKFDGKLILTGVINTPLQFVSPMVMLGRKSITGSFIGSMKETEEMLNFCKEENLTSMIEVVKMDYINTAMERLEKNDVRYRFVVDVAGSKLDQ	100	0	gi|166865124|gb|ABZ01817.1|	cinnamyl alcohol dehydrogenase [Gossypium hirsutum]	MA0403
1724	CotAD_47866	38493	0.125	1|1|3	1|4|16	1.36	0.002	0.708|0.047|0.010	CotAD_47866	MQETNNSRVNQRIATISAHLNPPSFSHMEGSSGLGRADCRAKGGLTGFKVAILGAAGGIGQPLSLLMKMNPLVSVLHLYDVVNTPGVTADISHMDTGAVVRGFLGQQQLEEALTGMDLVIIPAGVPRKPGMTRDDLFNINAGIVKTLCEGIAKCCPKAIVNLISNPVNSTVPIAAEVFKKAGTFDPNRLLGVTMLDVVRANTFVAEVMGLDPREVDVPVIGGHAGVTILPLLSQVKPPCSFTQKEIEYLTNRIQNGGTEVVEAKAGAGSATLSMAYAAVQFADACLRGLRGDADIVRCAFVASHVTELPFFASKVRLGRCGVEEIYPLGPLNEYERVGLEKAKKELETSIEKGVAFVKK	84.68	0	gi|462401069|gb|EMJ06626.1|	hypothetical protein PRUPE_ppa007722mg [Prunus persica]	RP376
1725	CotAD_04867	26510.8	0.105	-|2|1	-|3|2	1.41	-	-|0.043|0.611	CotAD_04867	MGEVKVLGSWSSPYGLRVQWALGLKSVEYEYIDEDLLNKSQMLLKYNPVHKKIPVLVHNGKPIAESAVILEYIEETWPQPHPLLPKDPYERAMVRFWINFLDNKDKVAPFITFFIGVGEEHKKAVNEAKELLKLYEEQVLGEKKYFGGEEIGMLDLAMGWMAYFGVIEEIVHVKILDAETFPRLHAWIQNFRAHPVIKNNLPDHDRLLQNYTEKRQRFLAYSPHAENA	62.44	3e-94	gi|462395830|gb|EMJ01629.1|	hypothetical protein PRUPE_ppa011142mg [Prunus persica]	PA0473
1728	CotAD_08521	48430.5	0.318	12|8|7	32|23|25	1.3	0.006	0.001|0.001|0.001	CotAD_08521	MAIIPCGSTFVAQWHIRPQLTTRSYVPNRIMTARLGVTSTMSYLRASNSGLFARDSLPLLSFVRPSQTSHHRRGAQFIVRAETDYYTVLGVSRNASKSEIKSAYRKLARSYHPDVNKDPGAETKFKEISNAYEVLSDDEKRSLYDKYGEAGLKGAGMGMGDFSNPFDLFESLFEGMGGMGGMGMGGRSSRNRAVDGQDEYYSLVLNFKDAVFGVEKEIEITRLESCGTCNGSGAKPGTTPSKCTTCGGQGQVISSARTPLGVFQQVMTCSSCGGTGEISTPCNTCSGDGRVRRTKRISLKVPAGVDSGSRLRVRSEGNAGRRGGSAGDLFVVIEVIPDPVLKRDDTNILYTCKVSYIDAILGTTIKVPTVDGMVDLKIPAGTQPNTTLVMAKKGVPVLN…	85.55	0	gi|224096157|ref|XP_002310554.1|	predicted protein [Populus trichocarpa]	RP184
1754	CotAD_31185	63683.7	0.09	1|1|2	1|1|9	1.45	0.063	0.093|0.044|0.011	CotAD_31185	MGLQQGLVTWFVGVLFLSTLLLSNADVHHYEFFVRESNFTKLCNTTTLLVVNDSYPGPEIRVHRGDTVFVNVHNQGNYGFTIHWHGVKQPRNPWSDGPEFVTQCPIQPGTNFTYEIVLSDEIGTLWWHAHSDWTRGSVHGAFVILPAKKETYPFPTPDADQTIILESWYDGDYKQIIDDALAAGVSPRQPSAYAISGHVGDTYGCPNDTIFRMQVDSEKIYLLRIINAAMNEHFFFTIANHTLTVVAQDASYVRRFTRDYILISPGQTMDVLVSANRNVGQYYMAIRPFSDSSAAPVDNITTGIFEYTNSEGGLNASLITLPVMNDTDAMINFLNQIRNTKVSQNPRINVPADKDIKRRVFMTLAVNNLPCNTCVVGSRLVASLNNVSYVSPSIDILQA…	100	0	gi|40218371|gb|AAR83118.1|	secretory laccase [Gossypium arboreum]	Cgl2906
1755	Cotton_D_gene_10025129	20971.5	0.174	3|2|2	30|28|18	1.28	0.007	0.001|0.001|0.001	Cotton_D_gene_10025129	MAKLSENTLAAHFIFTIFIVSALAENGSSFARTMDKKVLGMKKEKLSHFRLYWHDIVGGKNATAVPVVFPSRNSTTAFGMISVIDDPLTMGPELSSKMVGRAQGFYSAASQQEVGLLMAMNFAFMEGKYNGSTITILGRNTVFSKVREMPVIGGSGLFRFARGYVEARTHRFDPATGDAVVQYDCYVMHY	98.42	3e-138	gi|256010124|gb|ACU55135.1|	dirigent-like protein 1 [Gossypium hirsutum]	-
1759	Cotton_D_gene_10011175	12439.3	0.149	2|1|1	19|5|2	4.24	0.383	0.001|0.001|0.002	Cotton_D_gene_10011175	MAALKLVCALVLCMLVVEPIATTAITCGDVTSKVAGCLSYLQNGGNVPKACCDGIRSLNMMARTTPDRQTVCGCLQTAAKAVKIKGNLAETLPAKCSVNIPYKISTSTNCKNVK	66.33	1e-37	gi|329762910|gb|AEC04836.1|	lipid transfer protein [Dimocarpus longan]	-
1786	CotAD_00789	74816.6	0.045	-|1|1	-|1|2	2.05	-	-|0.398|0.016	CotAD_00789	MQISTVSINLLLLVIVLSLLGPAIEAQQPTYLYHSCPNTTTFAVNSTYQANRNTVLTWLSSNSTRGDGFYNTTAGRSPDMVYGLFLCRGDLSTSVCQACVTFATTDISQRCPNQTTAVVWYDECLLRYSNRNIFSVVAEEPEIRLRNTQNVTDNQDLFNQQVLAMMNDTTNQAANTPEGAKKFATREEDANFSSTFEALYTLGQCTPDLISMDCNRCLRMVISRLPTGWQGARVLNPSCNVRYEIYPFYNQTGVASPPSPAPPPPAPGGNGRRSWPIIVAIVVPIAASILLLLLMCWLLKRRAKKKYDTNVGYDITTIDSLQHDYATIEAATDKFSDANKLGEGGFGEVYKGILSNQQEIAVKKLSRGSGQGDEEFKNEVVLVAKLQHRNLVRLLGFCL…	62.44	0	gi|255555031|ref|XP_002518553.1|	ATP binding protein, putative [Ricinus communis]	ECU01g0630
1787	CotAD_41768	63087	0.12	4|4|2	8|5|2	1.37	0.022	0.053|0.033|0.278	CotAD_41768	MPSSPPQPPHPNHNIPSKNPLRKPACRLLLISMSAFLLLSLLSLALFFTLSSSHRHHLQQHPPQNTSQIRLACHSTRFPQPCESSLTLPPNPTSLQIILSAISVSSHNLKTGQSMVKSILESSKGNLNRTNAASICDEILSNSDYRINSTVDALSRGKIKDARAWMSAALCYQYDCWGALKYANDTQLVNQTMAFLDSLTQHTSNALSMMAAYDNYGDNINSWAPPKTERDGFYEKGSGGTELVFDGGFPTGLKSDVTVCKDGSGGCYKTVQEAVNAAPDNAEAGRRFVIEIKEGVYEETVRVPLAKKNVVFLGEGRGKTVITGSLNVGQPGMTTYESATVGVLGDGFMASGLTIKNTAGPDAHQAVAFRSDSDLSVIENCEFIGNQDTLYAHSLRQFY…	71.65	0	gi|359477033|ref|XP_002281640.2|	PREDICTED: probable pectinesterase/pectinesterase inhibitor 51-like [Vitis vinifera]	STM0786
1788	CotAD_54350	17004.7	0.581	6|6|5	95|94|82	2.77	0.061	0.001|0.001|0.001	CotAD_54350	MATITSAAVAIPSFTGLKAGATAAKVSATAKVAASPVPRGSIKASLKDVGVAVGATAASVILASNAMAIEVLLGSDDGGLAFIPKEFSVSPGEKIVFKNNAGFPHNVVFDEDEIPSGVDVSKISMPEEELLNAKDETYAVTLTEKGTYSFYCSPHQGAGMVGKVTVN	77.38	1e-80	gi|255539076|ref|XP_002510603.1|	Plastocyanin A, chloroplast precursor, putative [Ricinus communis]	VNG0249G
1790	Cotton_D_gene_10038150	34234.1	0.146	3|3|3	19|21|30	1.62	0.027	0.001|0.001|0.001	Cotton_D_gene_10038150	MASRPCLYAFLLLLAFQSTMIKVNTVSLPPPECRQEVASTKEKFEFLLNFLILKIELFLRSSIDRGINDISPGLVQGPAPIGAAVANLDNATRKIIEEFGLASIGHLRAIVNTTLLNAPIPMPQLDISPQAYNIFLTLILNDTKKSNPPYNPYANTNSFLFAAVFASSFLNQYYAGIMPSIIGSDERQLLSAIAFYEGGVFGALRAELNARVNLTVPPFNFTVGNLTNLTAQLANQLGGCGVKDEGLIVPLQLGAENRTTSNVVPGDVNSLAYARSAREIMRIAYTTGNASRPGGLFPRGLNGALPRRIRTLKLS	39.33	6e-61	gi|224061357|ref|XP_002300440.1|	predicted protein [Populus trichocarpa]	-
1792	CotAD_29076	46547.7	0.104	3|4|-	7|7|-	1.57	-	0.009|0.002|-	CotAD_29076	MAASSNFLLFSASLFFFIVSPSIQASFRPKALLLPVSKDASTLQYLTQIKQRTPLVPIKLTLDLGGEYLWVDCDQGYVSSSYKPARCNSAQCNLARSKACGSCFDGPKPGCNNNTCSLLPSNSVKNSGTIGEVAQDVVSIQSTNGKNPGKEVTVSKFLFTCGSSFLLDGLASGVKGMAGLGRTKISMPSQFAAAFSFPRKFAVCLSSSSGSNGVVIFGDGPYNFLPNIDVSKSLIYTPLILNPVSTSSASFQGDPSADYFIGVNGITINTKPVSFNKTLLSINKEGQGGTKISTVTPYTVMQTSIYRAVVNAFIKQTSKDARVPAVAPFSACYNAKSLGSTRVGPAVPQIDLLLPNKVVWRIFGANSLVQVNKDVLCLGFVDGGQEPTTSIVIGGHQIE…	73.1	0	gi|255552241|ref|XP_002517165.1|	basic 7S globulin 2 precursor small subunit, putative [Ricinus communis]	-
1797	CotAD_69844	27567.9	0.337	2|2|2	8|10|8	1.17	0.013	0.380|0.001|0.421	CotAD_69844	MAVAARFRSTLPIFHRLLRSDSLPSHTPRATLHRTLLCPELSRKYSTSLKKDENVKVPLALFGGSGNYASALYLAAVKGNALDKVESELLDLVQASKNSQLFSQFTKDLSVPAETRVKAINEICGQAKFSDLTKNFLVILAENGRLRHIESIAKRFVELTMAHKGEVKAIVTSVIPLPSQEEKELKETLQEIIGQGKQVKLEQKIDPSILGGLVVEFEQKVFDMSIKTRARQMERFLREPINFGSL	73.02	4e-117	gi|462415276|gb|EMJ20013.1|	hypothetical protein PRUPE_ppa010026mg [Prunus persica]	BH3757
1800	CotAD_06106	30049.9	0.109	3|3|3	29|42|29	2.9	0.002	0.001|0.001|0.001	CotAD_06106	MRFQVNDTIIFKYEKGSDSVLLVQKDDYDKCERKQPLMEMNNGSSEFKYPHSGPFYFISGKEGHCQKGQKMITVVMAVRHGTPSIHPPAAPSPKHHGPVTPGPAHSPYHHGPVAKPPTGSSPVPALAPGPIAKPPTGSSPVPALAPGPIAKSPTALTPGPAQSPYHHGPISNPPTASSPAPYSGPELSPTHHGPSPSPTAEGPIATPPSPQAPTTPVSSPPGEAPVSGPPAPPQGPSPSSSSSSPPPAGSQTQTSTPPGGSPPKSSATSIYSSIVVLAASLLFNMVFGSLTCGF	98.02	4e-125	gi|383932360|gb|AFH57277.1|	hypothetical protein [Gossypium hirsutum]	-
1803	CotAD_63911	17338.6	0.572	-|-|1	-|-|11	1.9	-	-|-|0.001	CotAD_63911	MGVVTYDYENTSPVAPARLFKAFTVEAPKVWPTAAPNAVKSIEVEANPSSGSIVKINFVEGLPFQYMKHQIGGHDENNFSYSYDLIEGGPLGDKLEKISYENKFEAAAGGGSICKSSMKFYTVGDNVITEDEIKALIKGSEGVYKPVEAYLLANPESCN	98.74	2e-113	gi|10505374|gb|AAG18453.1|AF305066_1	PR protein class 10 [Gossypium hirsutum]	-
1812	CotAD_02854	24406.1	0.116	1|2|2	5|5|5	4.36	0.329	0.001|0.001|0.001	CotAD_02854	MATFTVKNNCQYPIWPATLVGDPNFPQLPKTGFQLDPQAQDSLNVPSPWKGRLWARTQCSTSGGRFTCATADCGSDQIACNGKGGAPPATLAEFTIAANGGQDYYDVSLVDGFNLPLSITPQGGSGPNCTSTSCAANVNSACPPNFVVKGSDGNTIGCKSACAALNEPQYCCTGQYGSPETCKPTDYSKKFKDQCPEAYSYAYDDATSTFSCTGGPSYLITFCP	68.75	1e-107	gi|225441133|ref|XP_002265852.1|	PREDICTED: thaumatin-like protein 1 [Vitis vinifera]	-
1823	CotAD_20887	17239.6	0.78	7|7|7	74|62|72	1.97	0.004	0.001|0.001|0.001	CotAD_20887	MGVVTYNYESTSPVAPARLFKAFSLEADKVWPKAAPQAVKSVEVEANPGPGSIVKINFAEGLPFQYMKHQIGGHDDKNLSYSYSLIEGGPLGDKLEKISYDNKFEAAAGGGSLCKSSMKFYTVGDYVITEDEIKAQIKGSEGVYKAVEAYLLANPDACN	100	1e-114	gi|10505370|gb|AAG18451.1|AF305064_1	PR protein class 10 [Gossypium hirsutum]	-
1833	CotAD_72373	59641	0.297	1|1|1	3|2|1	4.16	4.546	0.019|0.264|0.025	CotAD_72373	MNTQSAYPHQHGEGEDDHHEKNSVLKKVKAKAKKIKDTIKKHGHGHNHDHGHEYHEGHIPDDHDLDEEDDEEEEEIVQDPEVHGAPMYESAAAKIVVSGQPEDLSRPGITNDRSKPMVLDPLESRGISGNYGTKDNEPPSSAVDGLEGLVREQARVDFGKRTDTVGEPLAPQNTPMPSSQGKDTTGPTRTFLHGEGGGYSGQPKVNLQRPIGLEEDPAAPKDNPDAYVTTNYQSKVTDPTGEGGEARGITPLLHSMDKMSIYEEDNGRKDNLPPATHPVASELYPTGSHNQFSPGPSPPLDTGTVDTKPEEHPRNVAADEPVNQSSYTEKISSATSVIADKAVSAKNIVASKLGYGEKDESRTTTNGSSPTTKGSAIDYGKKMAATMADKLSPVYEKVA…	43.95	4e-99	gi|224122360|ref|XP_002318815.1|	predicted protein [Populus trichocarpa]	-
1835	Cotton_D_gene_10013158	123079	0.006	-|-|1	-|-|1	5.43	-	-|-|0.033	Cotton_D_gene_10013158	METSFMTKKSQLTHSFKDKIVGRGDDKTTLLKLVLEFESEENVYIIPIVGFGGLGKTALAQFVYNDEMVKNNFELMMWVCVSDVFDVKIIVEIMIKSATGKAPDQNLEMDQLQKQLREKIGGKKYLLVLDDIWNDEWEKWVSLNELVVGGAKGSRIIVTTRSLGVAKITSKCQPYVLKGLSDNDAWSLFKEIAFEQRSADSTDSGFVEIGKLILERCSGVPLVIRTIAGTLSFKENKSEWLSFKDNELARISQNEGEILPTLKLSYDHLSSHLKHCFAYCRLYPKDHEIDVRTLVQFWVAQGFVKQLNPSQSLEEIGFGYFKDLVERSFFQEVEEDGFGDMRCKMHDLMHDLAESVAWMESSIIDSNKIASDVGEKCRHISINPSLIPLFKGKKLRTLL…	44.58	0	gi|255571626|ref|XP_002526758.1|	Disease resistance protein RGA2, putative [Ricinus communis]	RSp0842
1868	Cotton_D_gene_10017354	38918.5	0.116	3|3|2	13|14|14	1.45	0.004	0.001|0.001|0.001	Cotton_D_gene_10017354	MATLIKTLPFKSPPPLTPPATTFSLNSSKPFHVCLKQRLPPSSRPLRFSFTPSLRFLNLVPFASTGGETDTIHTQQQVQEPQIEDSSDVDVAAEDDTAADESSDVEETSSSGISSLLQSYKEALASNDESKVADIEALLKSIEDEKVDLEKKMASLSEELSTEKDRVLRIGADFDNFRKRTERERLSLVANAQGEVLENLLPVLDNFERAKAQIKVKTEGEEKINNSYQSIYKQFMEILGSLGVEPVDTVGNPFDPMAKYRVGSLFSQLHEAIMQEDSTEFEEGIILQEFQKGFKLGDRLLRPAMVKVSAGPGPSKTEQGESSESADVGESKETSETAESSETTKTHREAESS	63.96	1e-112	gi|225439145|ref|XP_002267243.1|	PREDICTED: protein grpE-like [Vitis vinifera]	YPO1107
1869	CotAD_38829	25766.9	0.224	-|1|1	-|1|1	1.61	-	-|0.209|0.021	CotAD_38829	MSSALEMSLDDLIKRNRKSGSGNPRGRGRGSGPGPARRFPNRGTNRSAPYTAATAPETTWQHDMYSDKGGAFQGQAVRAAAIETGTKLYVSNLDYGVSNDDIKELFSEVGDLKRYAIHYDWTGRSKGTAEVVFSRKADAMAAVKRYNNVQLDGKPMKIEIVGTNIATPAAPTVANVAFGSSNGAPRGGRGRVGGFRRQRGVAGGRGFGRGRGQGRGRGEKVSAEDLDADLEKYHTEAMQTN	71.19	3e-76	gi|225435024|ref|XP_002284215.1|	PREDICTED: RNA and export factor-binding protein 2 [Vitis vinifera]	YCL011c
1883	CotAD_31136	21975.2	0.258	2|2|2	4|2|4	3.12	0.698	0.061|0.002|0.040	CotAD_31136	MKTALFLAITSLVLGSTIASDEFDPVLDISGQELRTGIDYYILPVIRGRGGGLTLASTGNETCPLDVVQEQQEVSNGLPLTFSPVNVTQGVVRVSTDLNIKFSAASICVQTTLWTLHFDESVQKYIVTTGGVEGNPGRETLSNWFKIQKFEDDYRLVYCPTVCNFCRPVCGALGVFMDGGTRRLAISEEPLKVMFKRA	72.13	1e-100	gi|147805678|emb|CAN65022.1|	hypothetical protein VITISV_027379 [Vitis vinifera]	-
1886	CotAD_49978	63472.3	0.225	2|1|1	7|6|1	1.96	0.142	0.010|0.001|0.261	CotAD_49978	MANSCVGLFLFFALFLSHGIVELEASHHVYRNLQTVQSAASTDQPYRTGFHFQPPKNWINGVMVYKGLYHLFYQYNPKGAVWGNIVWAHSTSKDLVNWTPHEPAIFPSQPSDINGCWSGSSTILPGGKPAMLYTGIDTKNSQVQNLAVPKNLSDPYLREWVKSPKNPLMQPTAQNQINASSFRDPTTAWLGPDKKWRVIIGSKIDRQGLAILYKSKDFVNWVQAPMPLHSAKDTGMWECPDFYPVPVSGKNGVDTSLNGPYVKHVLKISLDDTKHDLYTIGSYDSLKDIYIPDKGSVENDSGLRYDYGKYYASKTFLDSIKNRRILCGWLNESSSVADDIKKGWAGVHAIPRQVWLDKSGKQLIQWPVVEIQKLRTNHVSLPSRLLKGGSVVEVSGVTA…	75.61	0	gi|462411459|gb|EMJ16508.1|	hypothetical protein PRUPE_ppa003470mg [Prunus persica]	SPy1816
1899	Cotton_D_gene_10022370	10983.5	0.39	3|1|2	8|2|3	1.23	0.052	0.026|0.975|0.109	Cotton_D_gene_10022370	MDLTPQQLIQFNGSDPSKPIYVAINGRIYDVTAGKSFYGPGGAYAMFAGKDASRALAKMSKNEEDVCPNLDGLSEKEMDVLNDWVKKFEAKYPVVGRVVS	80.81	1e-57	gi|255548688|ref|XP_002515400.1|	steroid binding protein, putative [Ricinus communis]	-
1901	Cotton_D_gene_10027447	136818	0.01	1|1|1	2|1|3	1.33	0.024	0.617|0.785|0.049	Cotton_D_gene_10027447	MSSLPSTSSSNSRKKYDVFLSFRGEDTRNNFTDHLYDALSRSGIVTFRDDPKLEAGEEISPELFTAIQQSWCSVIVFSQTYAFSSWCLEELAEIVKQHNNDGHKVFPIFYDVDPSDLRRQKEKVEEAFAKHEKRYREDSEKIQRWRNALIQVAGIKGWHLNNRHESEFIREIIKKISAKLCHPVTHSDLVGMTERLEDLYLKINIGENDVRIIGICGMGGIGKTTLARLAYNQMSHHFESKSFIADIREVSDKCGLVSLQKQLLSEIFHDECFEFFNVHEGNDIISHMLSRKKVLVVLDDVDNIQHLKCLVGGHDWFGLGSRIIVTTRDEHLLQSCQVDDVYIPTTLNTTDAIQLFNLKTFRSDTVPKDDFIELSYHVVSYAGGLPLALEVLGSFLCGR…	44.59	0	gi|224130518|ref|XP_002328629.1|	tir-nbs-lrr resistance protein [Populus trichocarpa]	alr0124_1
1906	Cotton_D_gene_10028765	48912.2	0.427	2|2|1	14|17|8	1.21	0.015	0.157|0.001|0.099	Cotton_D_gene_10028765	MATNAALAPSRIPANTRLPSKTTHSFPTQCPSKRLEVTEFSGLRSSSCVTFAKNVRDASFFDVLAAQLSPKGVGVPSTSVRGETVAKLKVAINGFGRIGRNFLRCWHGRKDSPLEVVVVNDSGGVKNASHLLKYDSMLGTFKADVKIVDNETISVDGKPIKVVSNRDPLKLPWAELGIDIVIEGTGVFVDGPGAGKHIQAGAKKVIITAPAKGADIPTYVVGVNEGDYDHEVSNIISNASCTTNCLAPFVKVIDEEFGIVKGTMTTTHSYTGDQRLLDASHRDLRRARAAALNIVPTSTGAAKAVSLVLPQLKGKLNGIALRVPTPNVSVVDLVVNVEKKGITAEDVNAAFRKSAEGPLKGVLEVCDIPLVSVDFRCSDVSSTIDSSLTMVMGDDMVKV…	90.51	0	gi|358248146|ref|NP_001240080.1|	uncharacterized protein LOC100806482 [Glycine max]	slr0884
1911	CotAD_14860	47127	0.238	3|3|3	16|19|27	2.52	0.126	0.001|0.001|0.001	CotAD_14860	MASSFLLFLLIFLSVSSFILLSESQKTSKPNRFVLQLQKDPKTKLYVTNIYKRTPSQKVPFVVDLNGRLLWVTCEKSYRSSTYHAPRCRSTQCSRADSHYCHICSTRDGPGCHNNTCGVMSMNPVTGLTAMSELAQDVLSIQSTQGSNPGPMVRVPQFLFTCAPSLLLQRGLPSTVQGVAGLGHSPISLPTQLASHFGSAGFAPTFALCLAPKGVMFFGDSPYYMLPNVDITRPLSYTPLIISPQGEYYMEVKSIKINDKDVPIDTALLSINKQGVGGTKLSTINPYTILHHSIFKAVTQIFSKELSAIPQVKPVAPFGACFNSKRFKNSRVGPGVPNIDLVLHDKHVMWRIYGANSLVEAAPGVSCLAFVDGGMKNNGASIIIGAYQMENNLVQFDMA…	55.56	8e-148	gi|147821120|emb|CAN68737.1|	hypothetical protein VITISV_030194 [Vitis vinifera]	-
1928	CotAD_22846	79657.6	0.179	4|4|4	13|16|11	1.43	0.001	0.001|0.001|0.001	CotAD_22846	MEGGRYLLHCFLLALLTTKAASHLFQSNANANANRKSYIVYMGDRLKDGASTALLHGSMVQDVFGSESKTVLYSYKKSFNGFVVDLTEEEAQKMAGMKGVVSVFPNEKRKLHTTRSWDFMGFPQQVERATMESDVIIGVLDTGIWPESLSFDDKGLGPPPSKWKGSCQFQPQDNFTCNNKIIGAKYYRSDGLFLPDDFESPRDADGHGTHTASTAAGSLVDGASLYGFGSGTARGGVPSARIAVYKICWSDGCEDADILAGFDDAISDGVDIISISVGGGQTRDYFEDAISIASFHAMKNGILTVSSAGNEGPGRSTISNFSPWSLSVAASTIDRKFSTKVQLGNNKIYEGVSINTFDLKNKTYPMIYGGDAANTTSTSTTSSRFCFPNSLDKNLVKGK…	66.38	0	gi|225449348|ref|XP_002277563.1|	PREDICTED: cucumisin-like [Vitis vinifera]	BH0684
1932	Cotton_D_gene_10002697	24803.4	0.335	3|-|-	25|-|-	8.3	-	0.001|-|-	Cotton_D_gene_10002697	MKTTTASVFLLFIIFSVTLSSILFGVANATNDPVLDIDGNEVQTGTPYYVVSSIWGAGGGGLALGRPSGNKCPEVVTQRRSGDNGIPVIFSNSDSNDGVVRQSSDINIEFIPLRPKLCRTTTVWKVDDYDHSAGKWWVITDGVKGNPGANTLTSWFRIEKVFDLNYKFKYCPTVCGTCPALCNEIGKDSDGEMVRFALSTGPGWSFYFKKVEKSAMEIEQVVHI	61.33	3e-86	gi|55139090|gb|AAV41233.1|	putative 21 kDa trypsin inhibitor [Theobroma bicolor]	-
1936	CotAD_40877	11845.9	0.05	-|-|1	-|-|1	9.37	-	-|-|0.014	CotAD_40877	MWPDIRILSSRESIFKGFRSFHFSSSSRSAPLASTPVRERDFSSSEELITEFCQECMIVCKGWNGDLKNAMKDGKPIIIEVNEFKSIEKFKIFDTNNLWVN	82.35	5e-20	gi|356529869|ref|XP_003533509.1|	PREDICTED: uncharacterized protein LOC100812099 [Glycine max]	-
1948	CotAD_10693	29884.1	0.491	1|1|1	23|10|21	1.37	0.007	0.001|0.004|0.001	CotAD_10693	MASSSFLLESPASIFSSSSIKAPLYLPKPYPFIVSVKRRRSERKRNPVLKSAVGDVSVVDTPPPPPPPPQDAKSELISSLKLKLLGVVSGLNRGLAANQDDLGKADDAAKELETVAGPVDLLTDLDKLQGRWKLIYSSAFSSRTLGGSRPGLPTGRLLPVTLGQVFQRIDVISKDFDNIAEIELGAPWPLPPLEVTATLAHKFEIIGSSKIKITFEKTSVKTRGTFSQLPSLDVPRIPDALRPPSNPGSGDFDVTFIDADTRITRGDRGELRVFVIS	99.28	3e-153	gi|38679313|gb|AAR26478.1|	harpin binding protein 1 [Gossypium hirsutum]	-
1979	CotAD_55482	39558.8	0.497	3|3|3	10|10|8	1.39	0.013	0.001|0.005|0.006	CotAD_55482	MEITNITEYEAIAKEKLPKMVYDYYASGAEDQWTLKENRNAFSRILFRPRILIDVSKIDMTTTVLGFKISMPIMIAPTAMQKMAHPEGEYATARAASAAGTIMTLSSWATSSVEDVASTGPGIRFFQLYVYKDRNVVAQLVRRAERAGFKAIALTVDTPRLGRREADIKNRFTLPPFLTLKNFEGLNLGKMDKTDDSGLASYVAGQIDRSLSWKDVKWLQTITSLPILVKGVLNAEDAGIIVSNHGARQLDYVPATIMALEEVVKAAQGRVPVFLDGGVRRGTDVFKALALGASGIFIGRPVVFSLAAEGEAGVRKVLQMLRDEFELTMALSGCRSLKEITRNHIVADWDQPRVVPRL	97.55	0	gi|366984550|gb|AEX09184.1|	glycolate oxidase [Gossypium hirsutum]	lldD
1987	CotAD_43217	66583	0.087	4|1|1	6|1|1	2.17	0.322	0.007|0.101|0.011	CotAD_43217	MGTLNQTIDVMAYVCIFFISDGNSFPIPCDSVSICIVLIDPKHVATSYVLYVLVTNIDHVFPTPLSFYIGVQVSFMPIQEARVERFRRVARAIGLQGRQQIISEPLVSFEEIIWFDSSCRNDREMNQGCLILVGILVTLSLPYSHAFWRNENKIQTAVFLSPKFVLGPGSVENRFYYNVDFPKGHIAVKSFDAEVIDEAGNPIPLHETYLHHWVVVRYYVRKGVEISEFDDPRKFNESDYISARNSGICQNLGQFFGLGSETRKTSTHVPNPYGIEVGNPAEIPSGFEEQWMLNVHAIDTRGAEDKLGCTECRCDLYNITVDEYGRPLRPDYKGGLLCCYDHTQCKVKHGFEAVRRALYLRYTVTWVDMDRSVLPVKIYIFDITDSWKRSRSSTGIIAE…	65.53	0	gi|224134212|ref|XP_002321764.1|	predicted protein [Populus trichocarpa]	-
2004	CotAD_58878	47988	0.252	1|1|1	8|10|4	1.3	0.004	0.009|0.001|0.090	CotAD_58878	MANHKPFPNFLSLILLSLVAIASAEVFFEERFEDGWESRWVKSDWKKDENMAGEWNYTSGKWNGDPNDKGIQTSEDYRFYAISAEFPEVNNKGKTLVFQFSVKHEQKLDCGGGYMKLLSDNIDQKKFGGDTPYSIMFGPDICGYSTKKVHAILTYNGTNHLIKKEVPCETDQLTHVYTFILRPDATYSILIDNVEKQTGSLYTDWDLLPPKKIKDPEAKKPEDWDDKEYIPDPEDKKPEGYDDIPKEIPDPDAKKPEDWDDEEDGEWTPSTIPNPEYKGPWKPKKIKNPNYKGKWKAPMIDNPDFKDDPDLYVFPNLKYVGIELWQVKSGTMFDNILVADDVEYAKKLAEETWGKQKDAEKAAFEEAEKKREEESKDDPVDSDAEDEDDADDTEGHESD…	93.33	0	gi|233955399|gb|ACQ91203.1|	calreticulin [Carica papaya]	-
2014	Cotton_D_gene_10034373	55694.2	0.262	3|3|3	15|8|9	1.27	0.004	0.001|0.001|0.001	Cotton_D_gene_10034373	MGMMRLSKCLVSLLFLVALSGFTHGFVMSPRTLLNRFSQNSNYYLTTEEHWFDQTLDHYSPYDHRQFKQRYYEFLDYFQVPDGPIFLKICGESSCNGISNDYLGVLAKKFGAAVVSLEHRYYGKSSPFKSHTTENLKYLSSKQALFDLAVFRQWYQESLNLKRSKTGAENSWFVFGISYSGALSAWFRLKFPHLTCGSLASSGVVLAVYNYTDFDKQVGESAGPECKAVLQEITELVDRSLESNRKELKKQFGAAELEIDGDFLYFLADAAVIAFQYGNPDALCTPLVEAKKAGEDLVAVYAKYVKDFYVGTFGVSVETYNQNHLKNTAVNEGSSDRLWWFQVCTEVAYFQVAPSNDSVRSSKINTKYHLDLCKNVFGEGIYPEVDMTNIYYGGTKIAG…	81.94	0	gi|255581402|ref|XP_002531509.1|	catalytic, putative [Ricinus communis]	-
2019	CotAD_67059	77892.3	0.346	2|2|4	11|13|19	1.32	0.041	0.001|0.380|0.001	CotAD_67059	MKPQSLCIFFLLHFFALLCTAASEYEDPSNGGTIVFTTLGRSNYAWDIYTLPTSDPPSPSNELRVTDGESVNFNGQFPSTSPSSVLSLLHNRSLIRTPGPQAPPPLQLVYVTERNGMPNIYYDALYYSAPGSTRSRSALEVPVRLQAPLLGLEESKNRVSMKDRPSLSGENLIYVSTHEDPGEPRTSWAAVYSTHLGTGLTRRLTPSGIADFSPAVSPSGVWTAVASYGKEGWGGEVEELSTDIYVFLTRDGTHRVKVVEHGGWPCWVDDSTLYFHRRSEDQWISVYKATFPKNKPVSTESVTIQRVTPPGLHAFTPATSPGNHKFIAVATRRPNSSFRHIELFDTVKNEFIELTRHVSPTTHHLNPFISPDSARVGYHKCRGESNGAKATQLLLENVK…	66.81	0	gi|225459635|ref|XP_002285877.1|	PREDICTED: uncharacterized protein LOC100267814 isoform 2 [Vitis vinifera]	PM0967
2029	CotAD_41987	29028.2	0.434	3|3|3	9|11|15	2.11	0.082	0.001|0.001|0.001	CotAD_41987	MEGSSSDKLIVVTREPDGIAIVTINRPKSLNSLTRPMMVDLAKAFKALAKDNSVRVIILSGAGRAFCSGVDLTAAQDVFKGDVKDPETDPVVQMEQCPKPIIGAINGVAITAGFEIALACDMLVAAKGATFVDTHARFGIFPSWGLSQKLARFIGPNKAREVSLAAMPLSAEEAEKLGFVNYVVDQNEVLNKARQLAGAIMKNSQDLVLRYKSVINDGYKLDLRQGLAIEKERGHEYYDGMTPEQFKKMQEFIARRSSKKPSSKL	78.76	3e-144	gi|462420141|gb|EMJ24404.1|	hypothetical protein PRUPE_ppa010027mg [Prunus persica]	AF0435
2044	Cotton_D_gene_10007437	66624.3	0.248	1|1|1	1|2|3	1.15	0.008	0.017|0.686|0.012	Cotton_D_gene_10007437	MATGQLFSRTTQALFYNYKQLPIQRMLDFDFLCGRETPSVAGIINPGAEGFQKLFFGQEEIAIPVHSTIEAACTAHPTADVFINFASFRSAAASSMAALKQPTIRVVAIIAEGVPESDTKQLIAYARSNNKVVIGPATVGGIQAGAFKIGDTAGTIDNIVQCKLYRPGSVGFVSKSGGMSNEMYNTIARVTDGIYEGIAIGGDVFPGSTLSDHILRFNNIPQVKMMVVLGELGGRDEYSLVEALKQGKVNKPVVAWVSGTCARLFKSEVQFGHAGAKSGGEMESAQAKNQALRDAGAVVPTSYEAFEAVIKETFDKLVEQGKITPVKEVMPPQIPEDLNNAIKSGKVRAPTHIISTISDDRGEEPCYAGVPMSSIVERGYGVGDVISLLWFKRSLPRYC…	96.55	0	gi|449462152|ref|XP_004148805.1|	PREDICTED: ATP-citrate synthase beta chain protein 1-like [Cucumis sativus]	MT0979
2055	CotAD_71900	57231.5	0.364	1|1|1	5|4|4	3.03	1.255	0.045|0.011|0.001	CotAD_71900	MDPYKHRPSSAFNSPFWTTNSGAPVWNNNSSLTVGPRGPILLEDYHLVEKLANFDRERIPERVVHARGASAKGFFEVTHDISHVTCADFLRAPGVQTPVILRFSTVIHERGSPETLRDPRGFAVKFYTREGNFDLVGNNFPVFFIRDGMKFPDMVHALKPNPKSHIQENWRILDFFSHHPESLHMFTFLFDDLGVPQDYRHMEGSGVNTYTLINKAGKAHYVKFHWKPTCGVKCLLEDEAIKVGGANHSHATQDLYDSIAAGNYPEWKLFIQTIDPDHEDKFDFDPLDVTKTWPEDILPLQPVGRLVLNKNIDNFFAENEQLAFCPAIVVPGIYYSDDKLLQTRIFSYADTQRHRLGPNYLQLPANAPKCAHHNNHHEGFMNFMHRDEEINYFPSRYDP…	100	0	gi|211906480|gb|ACJ11733.1|	catalase [Gossypium hirsutum]	ZkatE
2056	CotAD_58316	43025.2	0.231	5|4|5	26|17|13	1.32	0.002	0.001|0.001|0.001	CotAD_58316	MACVSFAKLNAPSSSWIGGQQSLPQRSGSSARLATRRVSLPIRAGAYTDELIKTAKTIASPGRGILAIDESNATCGKRLSSIGLDNTEPNRQAYRQLLLTTPGLGEYISGAILFEETLYQSTTDGKKFVDVLHDQKIVPGIKVDKGLVPLPGSNNESWCQGLDGLSSRSAEYYKQGARFAKWRTVVSIPCGPSALAVKEAAWGLARYAAISQDNGLVPIVEPEILLDGDHPIGRTLEVAEKVWAEVFYYLAENNVIFEGILLKPSMVTPGAEHKERANPETIAKYTLTMLKRRVPPAVPGIMFLSGGQSEMEATLNLHAMNQSPNPWHVSFSYARALQNTVLKTWQGRPENVEAAQKALLVRAKANSLAQLGKYSAEGESEEAKKGMFVKGYTY	90.36	0	gi|225424114|ref|XP_002282753.1|	PREDICTED: probable fructose-bisphosphate aldolase 3, chloroplastic [Vitis vinifera]	slr0943
2057	CotAD_23789	44544.7	0.205	2|1|1	6|1|2	1.16	0.021	0.041|0.800|0.987	CotAD_23789	MDSVFASIVQAPEDPILGVTAAYNKDPSPNKLNLGVGAYRTEEGKPLVLNVVRKAEQLLVNDQSRVKEYLPILGLAEFNKLSAKLILGDDSPAIQENRVATAQCLSGTGSLRVGAEFLAKHYHQRTIYIPQPSWGNHVKVFTMAGLSVKNYRYYDPTTRGLNFQGLLEDLGAAPAGAIVLLHACAHNPTGVDPTVEQWEQIRQSMRSKGLLPFFDSAYQGFASGSLDVDAQPVRTFVADGGECFIAQSYAKNMGLYGERVGALSIVCKAADVASRVESQLKLVIRPMYSNPPIHGASIAMTILKNSDMYNEWKIELKAMADRIISMRKQLFDALSAKGTPGNWSHIIKQIGMFTFTGLNSDQVAFMTKEYHIYMTSDGRISMAGLSSKTVPHLADAIHA…	97.78	0	gi|366984546|gb|AEX09182.1|	putative aspartate aminotransferase 1 [Gossypium hirsutum]	tyrB
2069	CotAD_69187	28484.8	0.421	7|7|6	55|68|70	2.45	0.002	0.001|0.001|0.001	CotAD_69187	MAEENVFGKPITEADNTASEKPITESEEDNVLDEAALELTLSEARSGSNLFGTVIDQAFVMGIPEYANRARLDRSVVAMQWKDRGGNYTAAVDYVREVKRRWGNGVSTLCVLYNGTGERLTYHTDNDWWGNIYLPYPQIIENGQWACFFHVKRTAAASGSMGAVVYRGKNKEGEDTDWLVAWDNPWNTLRFTNQAYAEINQAGHYDRIDWEALGRTISSAGRQHRAAWRGCVAQVQTEIDTSPLWEGVLSLE	41.83	5e-51	gi|449526892|ref|XP_004170447.1|	PREDICTED: 23 kDa jasmonate-induced protein-like [Cucumis sativus]	-
2070	CotAD_29995	33497.8	0.071	2|1|1	4|3|1	1.43	0.007	0.016|0.175|0.591	CotAD_29995	MANSIYRASMLQSNSQLLFQPCLSNKHCVPKKTNLLCFASSQLNPARSEVSFCTGTHLIPHPNKVERGGEDAFFVSNFKGGVIAVADGVSGWAEQNVDPSLFSKELMANASSLVGDLEVNYDPQILIRKAHAATGSKGSATAIVAMLERNGTMKVASVGDCGLRVIRKGQIIFSTTPQEHYFDCPYQLSSELVGQTYLDAVVSSVELVEGDTIVMGSDGLFDNVFDGEIVSTLAAYSDVVEAAKALANLASNHSLDSRFDSPYTIEARSKGLDVPFWKKFLGMKLTGGKLDDITVIVGQVITSAASPQLT	74.84	2e-164	gi|255550609|ref|XP_002516354.1|	protein phosphatase 2c, putative [Ricinus communis]	YHR076w
2074	Cotton_D_gene_10016528	60001.7	0.148	5|4|5	14|17|21	1.15	0.005	0.170|0.054|0.001	Cotton_D_gene_10016528	MAPPLAPPSLLFVSLQAVAAAEGDAIVEGTVYIDGKAPIGIIDDDFVCATLDWWPPEKCDYGTCSWGLAGLLNLDLNNNIFLNAVKAFSPLKIRLGGSLQDKVIYGTDDNQEPCTSFVKDPSEMFGFTKGCLPMKRWDELNAFFAKAGAKIIVGLNALAGKSIKPGGSAVGAWNYTNAESFIRYTVEKNYKIHGWELGNELSGNGVGTRIAVNQYAADTAALQRIVQKIYKDVDLKPLIIAPGGFYESKWFKEFIDKTTTSLDVVTHHIYNLGPGVDTHLIEKILNPSVLDGISGTFSGLHNVIKSSATKAIAWVGEAGGAYNSGRNLVTNAFVFSFWYLDQLGMASKYDTKTYCRQSLIGGNYGLLDTSTFVPNPDYYSALLWHRLMGRNVLSTSFDG…	71.54	0	gi|225446203|ref|XP_002263173.1|	PREDICTED: heparanase-like protein 3-like [Vitis vinifera]	-
2075	CotAD_38271	22971.4	0.205	-|1|3	-|2|12	1.19	-	-|0.781|0.005	CotAD_38271	MGLHVLKTTPLSSSYSKALLLATTAKPAAFAAAVLPCNPRLRFPFSSPKAITSSGYGSFLHLRKRGFRGSVVLTMAASGSVQKSEEEWSAILSPEQFRILRQKGTEYPGTGEYGKFFEEGIYKCAGCGTPLYKSTTKFNSGCGWPAFYEGLPGAINRHPDPDGMRTEITCAACGGHLGHVFKGEGFPTPTDERHCVNSISLKFIPANSSE	81.93	5e-93	gi|462397286|gb|EMJ03085.1|	hypothetical protein PRUPE_ppa009769mg [Prunus persica]	VC1998
2076	Cotton_D_gene_10031494	94131.3	0.03	3|-|2	3|-|2	1.59	-	0.039|-|0.131	Cotton_D_gene_10031494	MKQSVDHLVSDPTKIPRENASKKVESAWRILSGSDAYHASTDATLFSSSLPVLPHEKLNLNDTDNNYQSIDGITSDLNNLSQDVESNDPLGDIEAHALGNLLPDDENELLAGIMDDFDLSGLPNSLEDLEEYDLFGSGGGMELETDPQESLTIGMSKVSLSDAVVGNGMPHYALPNGVGTIAGEHPYGEHPSRTLFVRNINSNVEDSELRALFEQYGDIRTLYTACKHRGFVMISYYDIRAARTAMRALQNKPLRRRKLDIHFSIPKDNPSEKDVNQGTLVVFNLDPSVSNEDLRQIFGVYGEVKEIRETPYKRHHKFIEFYDVRAAEQALKSLNRSDIAGKRIKLEPSRPGGARRNLMLQLNQDLEQDESRGFRHQVGSPITNSPPGSWAQFNSPIEH…	77	0	gi|462407207|gb|EMJ12541.1|	hypothetical protein PRUPE_ppa001307mg [Prunus persica]	-
2087	Cotton_D_gene_10025559	72508	0.103	3|5|5	4|11|9	1.3	0.025	0.048|0.068|0.045	Cotton_D_gene_10025559	MTVSRSLKRQSPTAAGNTATWFLDKCRNMSSRPSTRFMASLLLLLFYSLADSFADLPSQFQAQQELTDINKSTILPTCPCRRAATLLEMDSKNGNECPKNITEASQIRHGLTLLDADFFNDIKVLEIAKGAKEFNIPIIRTNRKLVASINGGLHNPSPLVFNPEWSKEQSQGKASRFNHPSASGIQRPINEEDIAFMSVLELGELIKKKQITSEELTGIFLKRLRRYNPVLESVVTYTEDLAYQQAKEADKLLSQGVHLGPLHGIPYGLKDIISVPLYKTTWGSTTFKNQVLNIEAWVYKRLKSAGAVLVAKLVTGSLAYDDIWFGGRTRNPWNIEEFSTGSSAGPAACTSAGMIPFAIGSETAGSITYPASRCGVTALRPTFGSVGRTGVMSLSESLD…	77.62	0	gi|462406000|gb|EMJ11464.1|	hypothetical protein PRUPE_ppa003160mg [Prunus persica]	alr1018
2091	CotAD_12451	23792	0.484	4|4|3	29|29|27	1.35	0.006	0.001|0.001|0.001	CotAD_12451	MAVTFSNLHTESGLKALNDFLSGKSYISGNKLTKDDIKVYAAVLKNPGDSFPNVSQWYNSVSSQLAASFPGKAVGVGFGGKAAPAESAKAEAADDEDDLDLFGDETEEDKKAAEEREAAKKSAKKKESGKSSVLMDVKPWDDETDMKKLEEAVRSVEMPGLLWGASKLVAVGYGIKKLQIMLTIVDDLVSVDTLIEEYLTTEPRNEYIQSCDIVAFNKI	65.75	1e-72	gi|357121602|ref|XP_003562507.1|	PREDICTED: elongation factor 1-beta-like isoform 1 [Brachypodium distachyon]	YAL003w
2095	Cotton_D_gene_10026408	29663.4	0.302	1|1|1	2|1|1	2.17	0.34	0.007|0.539|0.145	Cotton_D_gene_10026408	MGKKLLTSVLVGLLVASAITQTVLAQNCGCAPNLCCSQHGYCGQGNDYCGTGCKEGPCFSKSPTGASVASIVSPQFFNGIINQARADCAGKKFYTRQAFLTALDSFPDFGKLGSDVESKREIAAFFAHATHETEFFCYKEEQDKSNSYCEANPKFPCAPGKSYHGRGPLQLTGNTNYGNAGNALKLDLLKNPEMVANNPVVSFKGSLWYWMAAVRPVIGQGFGATIKAINGRLECGVPAAQDKVQRRIRFYTDYCKQLGVDPGPKLSC	59.93	4e-108	gi|224146530|ref|XP_002326040.1|	predicted protein [Populus trichocarpa]	VC0769
2105	CotAD_52791	46925.6	0.118	4|1|3	4|1|3	1.61	0.034	0.006|0.442|0.113	CotAD_52791	MVKSDMASQWRVLSGENDWDGLLQPLNLDLRRYIIHYGQRAGSVGDLYNQNKHGEFPKEKFFAEAGLEKGNDFKYSVTHYIHAGSDIVEPAWFGFVAVTTDEGKAVLGRRDILIAWRGTIHYTEWINDLIADPKSASKLFGIGTEAKVHSGFLSLYTGTRSNSAVDHLSARDQVRDALRELMDKYKDEEISITVTGFSLGGALATLNAMDIVANGYNKPSSTLLGANNPCMVTTFTFGSPQVGDSGFKQLFKKLVDHHHLRLLRIRNANDPVHKWPFCTLTHVGKKLTVYSNKSPYLKYKWFFGRTLECTDNPPPNDYHPNIVTEEEIIANRGLLINWVADSVSAHNMDVYLHGIAGVQEGTSAFHLEVDLDFALVNKYLDRLKDDYKIPDHWWAGENR…	42.4	2e-107	gi|470115480|ref|XP_004293927.1|	PREDICTED: phospholipase A1-IIgamma-like [Fragaria vesca subsp. vesca]	-
2111	Cotton_D_gene_10008867	31622	0.439	1|1|1	8|5|6	1.27	0.002	0.105|0.001|0.001	Cotton_D_gene_10008867	MGQALGCIQVEQSTVAITEAFGKFDDVLQPGCHCLPWCFGKQAAGTLSLRVQQLDVRCETKTKDNVFVNVVASIQYRALAEKAQDAFYKLSNTRAQIQSYVFDVIRASVPKLELDAVFEQKNDIARAVEEELEKAMSHYGYEIVQTLIVDIEPDEHVKRAMNEINAAARMRVAANEKAEAEKILQIKRAEGDAESKYLAGLGVARQRQAIVDGLRDSVLAFSENVPGTSSKDVMDMVLVTQYFDTMKEIGASSKSNSVFIPHGPGAVRDIASQIRDGLLQASQNN	91.84	0	gi|462420312|gb|EMJ24575.1|	hypothetical protein PRUPE_ppa009573mg [Prunus persica]	NMA1382
2112	Cotton_D_gene_10040584	48053.7	0.085	2|-|-	5|-|-	1.48	-	0.016|-|-	Cotton_D_gene_10040584	MILPSKFQDETEKSDKPSPPLDVSVAFPQASPASVFPPSVSDYYRFDDLLSPEEKTLRMKVREFMEKEVAPIMAEYWEKAEFPFQILPKLADLGIAGFNTEGYGSPGLSITTSAIANAEIARVDASCSTFLLVHSVGMLTIASCGSEEQKQKYLPSLAQLKTIACWALTEPEYGSDASAVNTTARKVEGGWIIDGQKRWIGNSTFADVLVIFARNITTNQINGYIVKKNSPGLKATKIANKIGVRIVQNGDILLKNVFVPDEDRLPGLNSFLDTNKVLAVSRVMVAWQPIGISMGVYDMCLRYLKERKQFGAPLAAFQLNQQKLSLMLGDIQAMTLVGWRLCKLYDKGKMTPGHASLGKSWITLRARETVVLGRELLGGNGILADFHVAKAFCDMEPIY…	78.72	0	gi|359481157|ref|XP_003632582.1|	PREDICTED: acyl-coenzyme A oxidase 4, peroxisomal-like isoform 2 [Vitis vinifera]	APE2158
2113	CotAD_67264	40394.1	0.159	2|2|1	3|4|2	1.49	0.024	0.004|0.066|0.161	CotAD_67264	MATIFQLNNFPYKTFLTTPKHIQSTSKPSILLLNSIKRTQNSSSVSHFLTRKSIRSRPGFQVFAADDDEGSPDKEDEVMEEPETESGGVVVAEAEAEEEKPKEEVGEIESLKKALVDSFYGTDRGWKASSETRAEIVELITLLEAKNPTPAPTDSLPLLNGKWILAGGNSLLKLLKVVGWESIDPSTVVGIVSGVCARARYTSFTGLFPLLSRGQLRLVKVEEISQTIDAENLTVQNSVQFSGPLASSSISASAKFEVRSPRRVQIKFQEGIIGTPQLTDSIVLPENVEFMGQKIDLAPIKSLLNSVQDTASTVAKTISSRPPLKFSLSNSNSESWLLTTYLDEDLRISRDGGSVFVLIKEGSSLLTTLN	60.05	1e-122	gi|62900641|sp|Q9ZWQ8.1|PAP_CITUN	RecName: Full=Plastid-lipid-associated protein, chloroplastic; AltName: Full=CitPAP; Flags: Precursor	-
2117	Cotton_D_gene_10038314	31109.9	0.036	-|-|1	-|-|1	6.04	-	-|-|0.028	Cotton_D_gene_10038314	MLLVSLLICHLLSKVPATSLEPPKHFVLVHGSCHGAWSWYKVVPLLKSGGHNVTALDLGGSGVDPQQVNTLRSISDYIKPLREFMASLPDEEKVVLVGHSLGGLAISQAMEMFPEKVAVAVFVTASMPGPTLNVSILIQKALRDQDSQMDNHYTYDDGPSSPPTTFTFGPMFLSSKVYQLSPPEDSALASMLMRPIRLYSAEDMSREVVLSQKKYGSVNRVFIISEKDLVSKEDFVGWMIRENPPRQVEVIKGSDHMVMMSKPIQLSKLLLCLATNYSQR	69.26	5e-114	gi|225428683|ref|XP_002284944.1|	PREDICTED: polyneuridine-aldehyde esterase [Vitis vinifera]	mll1329
2123	Cotton_D_gene_10017450	12584.2	0.198	1|2|2	3|5|8	1.26	0.01	0.286|0.023|0.127	Cotton_D_gene_10017450	MATKQPNTGLFVGLNKGHVVTKKELAQRPSNRKGKTSKRVHFVRNLIREVAGFAPYEKRITELLKVGKDKRALKVAKRKLGTHKRAKKKREEMSSVLRKMRAHPGGGEKKK	90.99	1e-64	gi|357443979|ref|XP_003592267.1|	60S ribosomal protein L36 [Medicago truncatula]	YMR194w
2124	Cotton_D_gene_10010960	30903.2	0.238	1|1|4	4|5|10	1.51	0.004	0.005|0.049|0.003	Cotton_D_gene_10010960	MESKEEVISVELPAPASWKKMFFPKKVGSPRKTEVMFIAPTGEEINNRKQLEQYLKSHRGNPPITEFDWGTGETPRRSARISGKAKATPTPEKEPLKKRGRKSSSAKKEDEEAEAAPEKSEGEKESEKEDTQATEKETTEGEKGKDVSVDNQVENGSEMLSADQTATTDAKIEEAKQEEAVVVEETSTQMEVQEKPVAASCIDAPIEKPETMSLEANGDVEKENLNQTIPVPEGEVKEKSVQEAAGKCNVEVEDVGVNENGKLEPSVQTDAPQQPGPASVSC	84.21	2e-53	gi|255553181|ref|XP_002517633.1|	Nucleosome-binding protein, putative [Ricinus communis]	-
2127	Cotton_D_gene_10025718	33021.3	0.256	5|5|5	26|15|19	1.19	0.001	0.027|0.014|0.003	Cotton_D_gene_10025718	MRTSFRAFPVVTVPPLPSLGPTASFPARFPSLPQRRLCKFGVKCSYAEAGISDDSRSATIDVVADVRNERIVVLGGSGFVGSAICKAAVSKGIEVISLSRSGRPTYSGSWVDQVNWVPGMFRDVFYANWDEVLVGATAVVSTLGGFGSEEQMKRINGEANVVAVSAAKDFGIPKFILISVHDYNLPSFLLSSGYFTGKRKAESEVLSKYPNSGVVLRPGFIYGKRRVDGFELPLDLVGEPLERILSAVENFTKPLNALPASDLILVPPVSVDDVAYAVVNAVRDDDFFGVFTIEQIKEAAAKVKV	82.29	2e-157	gi|224139010|ref|XP_002326745.1|	predicted protein [Populus trichocarpa]	YLR290c
2134	Cotton_D_gene_10021205	13158.2	0.129	2|2|2	32|38|32	1.52	0.002	0.001|0.001|0.001	Cotton_D_gene_10021205	MAASTSVSVAGFKGSLGKSSFNGGEDYAMLAAKSAPNVVRIGKPVRAQPMMKNVNEGKGVFAPLVVVTRQIVGKKRFNQLRGKAIALHSQVINEFCKAIGADGKQRQGLIRLAKKNGEKLGFLA	81.82	1e-65	gi|255574925|ref|XP_002528369.1|	conserved hypothetical protein [Ricinus communis]	-
2155	CotAD_26058	33004.5	0.092	2|2|2	2|2|3	2.6	0.095	0.089|0.009|0.169	CotAD_26058	MEGPYLGIIVPNSFEMNRLLQTGSFLEDHKMPYLDFAGRRFRIGRLENERVIIVMTGLSMVKGILHYGIAGNANSQLQIGDVTIPQFWAHTGLWNWQRYGDGPEDELALESNGDYTREIGYLRFSDYYNGTNCNNSSDNLLNNVWYQPEEIFPINGVPEQRQHAFWVPVNKHYFAIAERVQGLRLAGCVNGTCLPRPPRVVRVQRGISSNIFVDNKACREFLNSKFNATAIDMETAAIALVCHQQNMPFIAFRSLSDLAGGGSALSNEAASFATLAAQNAVDVLLRFISLLSS	70.68	6e-153	gi|462400053|gb|EMJ05721.1|	hypothetical protein PRUPE_ppa018203mg [Prunus persica]	HP0089
2171	CotAD_73358	13819.8	0.242	2|1|2	16|10|9	1.27	0.003	0.001|0.002|0.005	CotAD_73358	MATLTQCTLWNGTESSANLEFSIYEGAKEDITMTTLSSFEQSINSMAGGLVYNVGTKIKWIVAWTNDGKVCTTIKKCDEPVTWSKIITQLQPHDSTHTYQGYTSKVNAEMNTNGSLTLEAKLLV	33.85	3e-15	gi|293633673|gb|ADE60222.1|	MIC-3 [Gossypium longicalyx]	-
2173	CotAD_33106	22900.1	0.296	1|2|1	1|2|3	2.28	0.042	0.001|0.001|0.001	CotAD_33106	MAAKVFAYFVALVAVFSVAKSDPDLLQDICVADTSSGVKVNGFACKKDADVTENDFFFSGLAKPAVVNNSVGSVVTGANVEKIPGLNTLGVSLSRIDYQPGGLNPPHTHPRATEIIFVLDGELDVGFITTANKLISKSLKKGDIFAFPKGLVHFQQNNGKEPASVISGFNSQLPGTQSIAVTLFGSTPAVPDHVLTKAFQIGTKEVNKIKSRLSPK	78.97	7e-104	gi|224068291|ref|XP_002302696.1|	predicted protein [Populus trichocarpa]	sll1358
2187	CotAD_37664	58375.8	0.26	-|-|2	-|-|13	1.41	-	-|-|0.001	CotAD_37664	MMMRFSLQKVKNLPALRPQVLASASPRFSTATESSFNHRNPSRVPNLIGGAFVDSKSTSTIDVINPATQEVVSQIPLTTNEEFKAAVAAAKQAFPSWRNTPITTRQRIMFKLQELIRRDMDKLAKNITTEQGKTLKDAHGDVFRGLEVVEHSCGMATLQMGEYVPNVASGIDTYSVREPLGVCAGICPFNFPAMIPLWMFPVAVTCGNTFVLKPSEKDPGASIMLAELAIEAGLPPGVLNIVHGTNDIVNAICDDDDIRAISFVGSNTAGMHIYGRASAKGKRVQSNMGAKNHGIVMPDANKDATLNALLAAGFGAAGQRCMALSTIVFVGDSESWLNDLVERAKGLKVNAGIEPNADLGPVISKQAKERICRLVQSGVERGAKLLLDGRNVVVPGYEQ…	86.32	0	gi|255554609|ref|XP_002518343.1|	methylmalonate-semialdehyde dehydrogenase, putative [Ricinus communis]	BH0995
2215	Cotton_D_gene_10006861	34170	0.222	-|5|-	-|19|-	1.83	-	-|0.001|-	Cotton_D_gene_10006861	MASTIPIVTLLIVMLSCHAANAQLSPNFYASSCPNLQTIVRNAMSRAVNRETRIGASILRLFFHDCFVNGCDGSILLDDTATFTGEKNAVPNRNSARGFEVIDTIKTNVEAACSATVSCADIIALAARDGVALLGGPTWQVPLGRRDARTASQSAANNQIPSPFANLATLTSSFAAKGLSTRDLTALSGGHTIGLARCTTFRGRIYNDTNIDANFAATRRANCPASGGDNNLAPLDIQTPTRFDNDYFRNLVAQRGLLHSDQELFNGGSQDALVRTYSNNPATFSADFAAAMVRMGNISPLTGTQGEIRRNCRVVN	99.05	0	gi|5453379|gb|AAD43561.1|AF155124_1	bacterial-induced peroxidase precursor [Gossypium hirsutum]	-
2230	CotAD_74326	23938.1	0.272	4|4|4	23|30|31	1.3	0	0.001|0.001|0.001	CotAD_74326	MATSALAIATAKPLTHRFSNSKHTSSPSFSCSCSSSTPLPPPNEPKLSFSSKPVAKQCVFNVGVGLLATSLLACSPLEADATRIEYFATVGEPQCELNYAKSGLGYCDVIVGSGVEAPRGELVNIHYTARFADGIVFDSSYKRARPLTMRIGLGKVIKGLDQGILGGEGVPPMLVGGKRRLQIPPNLAYGPEPAGCFSGDCNIPANATLLYDINFVGIYSGNAK	70.43	5e-108	gi|225438635|ref|XP_002281281.1|	PREDICTED: probable FKBP-type peptidyl-prolyl cis-trans isomerase 4, chloroplastic [Vitis vinifera]	SPAC27F1.06c
2233	Cotton_D_gene_10019406	13065.3	0.074	-|1|-	-|2|-	2.4	-	-|0.024|-	Cotton_D_gene_10019406	MIIEAIGALKEKNGSSKRVILAHKLLPSNHDELLTQHLKLLKSSGQLVMVRKSYKFAPSATSNILDGSSAPKRGRGRPPKVKPTISATNFESQPVNVSAAGEVKKSIGRPRKNAPIGIVIMS	46.79	5e-17	gi|462405658|gb|EMJ11122.1|	hypothetical protein PRUPE_ppa004509mg [Prunus persica]	-
2236	Cotton_D_gene_10028401	61813.2	0.162	3|7|8	4|16|24	1.5	0.012	0.001|0.001|0.001	Cotton_D_gene_10028401	MAHFLTYLLLSFLIIYDSLGLSQSNQFCDAGVGYPESTCGFSSSSSSKLLIKGGTVLNAHQQEVADVYVEDGIIVAVKPNIKVDEDVTLLDATGKYVMPGGIDPHTHLAMEFMGTETIDDFFSGQAAALAGGTTMHIDFVIPVNGSLVAGFEAYKKKAKKSCMNYGFHMAITKWDESVSREMEIMVKEKGINSFKFFMAYKGSLMISDELLLQGLERCKSLGALAMVHAENGDAVFEGQKRMIDLGITGPEGHALSRPPVLEGEATARAIRLAKFVNTPLYVVHVMSIDAMEEIARARKSGQKVIGEPVVSGLVLNDSGLWDPDFVTAAKQESSITISLLSHSINYYKYIEMLYSIHFRYVMSPPIRESGHDKALQAALSTGVLQLVGTDHCTFNSTQK…	82.46	0	gi|359479124|ref|XP_002273526.2|	PREDICTED: dihydropyrimidinase-like [Vitis vinifera]	Z0666
2246	Cotton_D_gene_10022195	21579.4	0.162	2|1|2	5|1|3	1.29	0.016	0.039|0.867|0.130	Cotton_D_gene_10022195	MAEETKKEVAAETPVAPTPAVEAPTPVAEDLKADSKKTTVAPPPAEEKSDESKALAVVEKAPEPAPKKSSTGSHDRDVALADLEKEKKLSFIKAWEDSEKTKAENKAQKKLSAIVAWENSKKAALEAKLKKIEEQLEKKKAEYAETMKNKVASIHKEAEEKRAMVEAKRGEEVLKAEEMAAKYRATGQSPKKLLGCF	80.95	4e-70	gi|224130228|ref|XP_002320784.1|	predicted protein [Populus trichocarpa]	-
2253	Cotton_D_gene_10017963	16018	0.141	1|1|1	1|3|4	1.49	0.016	0.451|0.536|0.042	Cotton_D_gene_10017963	MAVAKSACLNHISRESSDIRRLANFYKEIFGFEEIESPDFGEFKVIWLNLPGSFPMHLIERNPLTKLPEGPYSSTAAVADPSNLPRGHHICFTVSNFDSFVQSLKDKGIQTFQRSLPNGKVRQIFFFDPDGNGLEVASREAP	83.33	4e-84	gi|470121398|ref|XP_004296757.1|	PREDICTED: methylmalonyl-CoA epimerase, mitochondrial-like isoform 2 [Fragaria vesca subsp. vesca]	SPBC12C2.12c
2261	Cotton_D_gene_10007844	27324.9	0.134	2|2|3	13|11|14	1.21	0.005	0.002|0.047|0.001	Cotton_D_gene_10007844	MSALRSTISSGIIRSTSPTHSLLPAASSFKPIKNPCLPQTHKLFTSNSNTFSAPKRGFTCKSQAIPSDNSAPEKVQELHVYELNERDRGSPAYLRLSQKSVNSLGDLVPFSNKIYRGDLEKRIGITSGICILIEHKPEMKGDRYEAIFSFYFGDYGHIAVQGPYLTYQDTYLAITGGSGIFEGVSGQVKLHQIVFPFKIFYTFYLKGIGELPEELLCKPVDPHPAVEAVPAAKACEPHATIANFTN	73.31	2e-118	gi|255579071|ref|XP_002530384.1|	Allene oxide cyclase 4, chloroplast precursor, putative [Ricinus communis]	-
2288	Cotton_D_gene_10036972	58408.1	0.01	-|-|1	-|-|3	6.39	-	-|-|0.001	Cotton_D_gene_10036972	MVMDVSSVFVSETGSEDDGLLDLSDNDFFLTGSSSEEADADDEWTESTRERASGIAASGMSSDERNQEKKEISKKANALTERKQKRKKCQSETIIKPAVSDCGEKKISSMKNKDVGDGRCIAEIKSPAMICAEEIQSNLEPEFPSFAKSLVRSHVGSCFWMGLPGMFCKIHLPRKDTTITLEDESGNQFHVKYYADKTGLSAGWRQFCSAHNLLEGDVLVFQLVEPTKFKIYIIRANDLNELDGALGLLNLDAYTKQSDAGKLFDDAETGPTVSKSTKRKRPKPLPLASVRKKNKRSGLQILSCNVGQPAEQSENDSEEVGSEVLEGFKRTEYAIQFKDITSFENILVDGLVIDPELSEDIRSKYYQLCCSQNAFLHENIIQGISFKFKVGIISETVNI…	58.56	1e-173	gi|224084330|ref|XP_002307261.1|	predicted protein [Populus trichocarpa]	-
2290	CotAD_18399	25522.5	0.39	7|6|8	46|41|48	1.25	0	0.001|0.001|0.001	CotAD_18399	MELSLFSYHQNSFSLLHKPFFSLPISGKRVPKRDPFLLQCHCTLSSSSNDDDNIKAAIVSLQHEGRRVVLGSLLTAAAAMYISDVAEAASTSRRALRGAKIPETEFTTLPNGLKYYDLKVGSGLKAVKGSRVAVHYVAKWRGVTFMTSRQGLGVGGGTPYGFDIGQSERGNVLKGLDLGVEGMRVGGQRLLIVPPELAYGKKGVQEIPPNATIELDVELLSIKQSPFGTPVKVIEG	76.27	7e-127	gi|225441076|ref|XP_002264435.1|	PREDICTED: probable FKBP-type peptidyl-prolyl cis-trans isomerase 1, chloroplastic isoform 1 [Vitis vinifera]	ECs4198
2316	CotAD_45594	40624.3	0.504	2|2|2	7|4|7	1.14	0.028	0.837|0.403|0.012	CotAD_45594	MEITNVSEYQEIAKQKLPKMAYDYYASGAEDQWTLHENRFAFTKILFRPRILIDVSKIDMTTTVLGFKISMPIMIAPTAFQKMAHPEGEYATARAASAAGTIMTLSSWATSSVEEVASTGPGIRFFQLYVYKDRNVVAQLVRRAERAGFKAIALTVDTPRLGRREADIKNRFTLPPFLTLKNFEGLDLGKMDQADDSGLASYVAGQIDRSLSWKDVKWLQTITTLPILVKGVLTAEDTRIAVEAGAAGIIVSNHGARQLDYVPATIMALEEVVKAAQGRVPVFLDGGVRRGTDVFKALALGASGIFIGRPVVFSLAAEGEAGVRKVLSMLRDEFELTMALSGCRSLKEITRDHIVTEWDSPHPRPAPRL	92.99	0	gi|147789493|emb|CAN67413.1|	hypothetical protein VITISV_005886 [Vitis vinifera]	lldD
2321	CotAD_41668	39643.4	0.223	5|-|4	24|-|15	1.45	-	0.001|-|0.001	CotAD_41668	MALLLTAQPSALLRSKSLKVKSFFSQSPKPTSLSFPFSSKPHKPLSFSSFISLSSSRSDPTPESDSDPETPTQINITDEWGERSELGSEPEPTKLPDSDPPRNEDEWEEQYVEKGNGTPAAAQGAAEPATADVAEGFDDRVADLKRCLVDSVYGTELGFRAGQELRAEILELVNQLEAVNPTRAPIEATQLLDGNWILLYTAFSELLPLLAAGATPLLKVKSISQSIDTASQSIVNSTTLSGPFADLSFSASATFEVRSPSRIQVEFKEGIVQPPEIKPSVDLPADIDVFGQRISLSPVQQSLGPLQDLVANISRTISGQPPLKIPIPGKRSSSWLLITYLDEDLRISKGDGGLFVLARQGSPLLEQ	68.92	2e-128	gi|224139006|ref|XP_002326744.1|	predicted protein [Populus trichocarpa]	-
2338	CotAD_33621	50939.3	0.022	1|1|1	7|6|3	1.22	0.012	0.036|0.030|0.737	CotAD_33621	MMFLKTLCLPLVITFLSLSSYCFGLGRYREEDPFHVDFRRGRAYHLPTSYRHPYFRTFGVRGQPNYHNSYYKNEIQSRLDRASGAATPKVVNVDDFGAKANGRDDSQAFKKAWNYACSSSQGAIMVVPKKKIYRLKPINFSGPCKSPLLLKIYGTLEATEDHSDYQDNGRRWLYFDNVENLRVEGGGIIDGNGKTWWEKSCKVNKALAVTFNECTNLRVSSLRIKDAQQMHVIFQKCVNVKAFNLLVTAPGNSPNTDGIHVTGTQNIYINNCVIGTGDDCISIVSGSKNVRATGITCGPGHGISIGSLGAGNSAAYVSNVIINKATLSGTDNGVRIKTWQGGSGYAKNIKFQNIVMYNVSNPIIIDQNYCDQENPCRKQTSAVQVSNVLYQNIRGTSAS…	68.63	0	gi|224104077|ref|XP_002313308.1|	predicted protein [Populus trichocarpa]	RSp0880
2340	CotAD_75460	15889.2	0.22	1|1|1	4|3|8	1.34	0.001	0.047|0.189|0.011	CotAD_75460	MPVLGHHQQPCENTSSMRLSFFVCSDIIKTWGDAPSSMLPTLKKLIAGGIRVWVFSGDTDGRIPVTATRLTLNKLGQKIIEDWTPWYTNHKQVGGWTIEYEGLMFVTIRGAGHQVPTFTPSQALQLVRHFLANKKLPPTPF	70.73	4e-63	gi|297808321|ref|XP_002872044.1|	hypothetical protein ARALYDRAFT_910331 [Arabidopsis lyrata subsp. lyrata]	-
2344	CotAD_22966	14279	0.305	1|1|1	11|9|9	1.31	0.004	0.008|0.010|0.097	CotAD_22966	MSWQAYVDDHLMCEIEGNHLSAAAIIAHDGSVWAQSANFPQFKPEEINAIMNDFNEPGTLAPTGLHLGGTKYMVIQGEPGAVIRGKKGPGGVTVKKTNMALIIGIYDEPMTPGQCNMIVERLGDYLLDQGY	100	3e-83	gi|302325341|gb|ADL18409.1|	profilin [Gossypium hirsutum]	-
2354	CotAD_16070	34811.5	0.222	1|2|1	4|2|1	1.77	0.289	0.566|0.026|0.362	CotAD_16070	MASSFGVLFVVGVWMMMGSGSYAQLSTNFYSKSCPKVLSTVELVVETAVSKEQRLGASLLRLFFHDCFVNGCDGSVLLDDTSSFTGEQTATPNNGSLRGFEVVDEIKAKVEKVCPGVVSCADILAIAARDSVVILGGPDWDVKLGRRDSKTASFSDANSGVLPLGSANLSQLISLFQAQGLSTKDMVALSGAHTIGKARCLVFRNRIYNDTIIDTSFAKTRRSSCPRTRGSGDNNLAPLDLATPNSFDSKYFENLLNKKGLLHSDQELFNGGSTDSLVKTYSSNVKKFYSDFIAAMIKMGDIKPLTGSNGEIRKNCGKPN	100	0	gi|19698446|gb|AAL93151.1|AF485265_1	class III peroxidase [Gossypium hirsutum]	-
2370	CotAD_52568	106406	0.183	9|7|-	47|48|-	1.25	-	0.001|0.001|-	CotAD_52568	MSFTISLLSLTLSSFCLLLVLISCFSGGYSSSSSSAAPTRIGKGYRLISIEDTSDGGFLGHLQVNQKNNFYGPDIPLLQLYVKHESENRLRVHITDAEKQRWEVPYNLLPRDQPPKPKQAIGRSRKKPISVLEIAGSELIFLHTVDPFSFAVTRRSNGQTLFNSSSGGGDSFGEMVFKDQYLEISTQLPEDASLYGLGENTQPHGIKLYPNDPYTLYTTDVSAINLNTDLYGSHPVYMELRNVGDKPYAHAVLLLNSNGMDVFYRGNSLTYKLIGGVFDFYFFVGPTPLDIVDQYTSFIGRPAPMPYWSLGFHQCRWGYHNLSVVEDVVENYKKAKIPLDVIWNDDDHMDGHKDFTLNPINYPRPKLLAFLEKIHSIGMKYIVLIDPGIGVNSSYGVYQ…	82.71	0	gi|255581663|ref|XP_002531635.1|	alpha-glucosidase, putative [Ricinus communis]	BH1905
2371	Cotton_D_gene_10014705	17695.3	0.138	1|1|1	3|9|7	1.16	0.008	0.575|0.487|0.050	Cotton_D_gene_10014705	MAISTLQKLTSQIHRLPSLSSQILTRSSATLTSSPSSSKKVADRLVKLFAIDPEGQKREVVGLAGQTLLRALTNSGLIDPDSHRLEEIDACSAECEVNIAQEWLEKLPPRTYDEEYVLVRNSRGRILNKHSRLGCQVVLTPQLQGMVVAVPEAKPWDIP	73.58	2e-80	gi|224065308|ref|XP_002301767.1|	predicted protein [Populus trichocarpa]	SPAC22E12.10c_2
2374	CotAD_17097	51859.7	0.293	3|3|4	41|27|39	1.39	0.002	0.001|0.001|0.001	CotAD_17097	MASLPFIFFLSFFIISTTLTSAGAAAATIKLSLSPFPHPSSSHPYQILNNLVTSSVARAHHLKHPKAKADNTTSSLLRAPLFSHSYGGYTISLKFGTPPQTLPFVMDTGSSLSWFPCTSRYLCSQCAFPNVDPAKIPTFAPKLSSSSKLVGCRNPKCSWLFGPDVESRCQDCEPTSENCTQTCPPYIIQYGLGSTAGLLLVENLAFPQKTFQDFLVGCSILSNRQPAGIAGFGRSAESIPSQLGLKKFSYCLVSRRFDDTGVSSNMLLETGSGSGDAKTPGLSYTPFYRNQVASNPVFKEFYYVTLRKILVGDKHVKVPYSYLVPGSDGNGGTIVDSGSTFTFMERPVFEVVSKEFEKQMGNYRRVREIENRSGLAPCFNTSGYTSIEIPELSFQFKGG…	66.35	0	gi|224091907|ref|XP_002309394.1|	predicted protein [Populus trichocarpa]	-
2376	Cotton_D_gene_10011530	46705.9	0.092	-|-|2	-|-|3	1.66	-	-|-|0.005	Cotton_D_gene_10011530	MVASSNFLLFSASLFFFIVSPSIQASFRPKALLLPVSKDASTLQYLTQIKQRTPLVPIKLTLDLGGEYLWVDCDQGYVSSSYKPARCNSAQCNLARSKACGSCFDGPKPGCNNNTCSLLPSNSVKNSGTIGEVAQDVVSIQSTNGKNPGKEVTVSKFLFTCGSSFLLDGLAGGVKGMAGLGRTKISMPSQFAAAFSFPRKFAVCLSSSSGSNGVVIFGDGPYNLLPDIDVSKSLMYTPLILNRVSTSSASFQGDPSADYFIGVNGITINTKPVSFNKTLLSINKEGQGGTKISTVTPYTVMQTSIYRAVVNAFIKQTSKVARVPAVAPFSACYNAKSLGSTRVGPAVPQIDLLLPNKVVWRIFGANSMVQVNKDVLCLGFVDGGLEPTTSIVIGGHQIE…	72.45	0	gi|255552241|ref|XP_002517165.1|	basic 7S globulin 2 precursor small subunit, putative [Ricinus communis]	-
2379	CotAD_76077	16947.3	0.101	2|1|2	2|1|3	2.43	0.449	0.019|0.408|0.162	CotAD_76077	MADAMRRLHTLDPATCPFDHQAKHRIERARTRMEAGLVDQDDLDEEHQGLAPAELFARLKARMPDGEDLVVTHGDACLPNIMVENGRFSGFIDCGRLGVADRYQDIALATRDIAEELGGEWADRFLVLYGIAAPDSQRIAFYRLLDEFF	100	5e-106	gi|218157748|gb|ACK58633.1|	neophosphotransferase [Carica papaya]	L33782
2382	CotAD_27075	57937.5	0.198	4|3|-	13|8|-	2.03	-	0.001|0.001|-	CotAD_27075	MAPSTLTALAEEKTLQASFVRDEDERPKVAYNQFSNDIPVISLAGIDDVDGKRGEICKKIVEACEDWGVFQVVDHGVDTKLVSEMTRLAREFFALPAEEKLRFDMSGGKKGGFIVSSHLQGEAVQDWREIVTYFSYPLRSRDYSRWPDKPEGWVEVTKEYSEKLMGLACKLLEVLSEAMGLEKEALTKACVDMDQKVVVNFYPKCPQPDLTLGLKRHTDPGTITLLLQDQVGGLQATRDNGKTWITVQPVEGAFVVNLGDHGHGEAVQDWREIVTYFSYPLKSRDYSRWPDKPEGWIEVTKEYSEKLMGLACKLLEVLSEAMGLEKEALTKACVDMDQKVVVNFYPKCPQPDLTLGLKRHTDPGTITLLLQDQVGGLQATRDNGKTWITVQPVEGAFVV…	100	0	gi|74273629|gb|ABA01482.1|	gibberellin 20-oxidase 1 [Gossypium hirsutum]	SPCC965.15
2390	Cotton_D_gene_10035340	57252.4	0.249	10|7|9	46|25|32	1.33	0	0.001|0.001|0.001	Cotton_D_gene_10035340	MKPLLLCFAFAVIVGIGNAAVMDTGGLSRDSFPKGFVFGTATSAYQVEGMANKGGRGPCIWDVYVKQPGHIANNDTADVAVDQYHHYKEDVDLLANFNFDAYRFSISWSRIFPEGVGRVNWEGVDYYNRLINYLVKKGITPYGNLYHYDLPQALQEKYNGFLNRQIVEDYADYAEFCFKTFGDRVKNWFTFNEPRIVAALGFDNGINPPSRCSKEVGNCTDGNSAIEPYIVGHNLILSHAEAVKRYREKYQAKQKGSIGILLDFNWYEPLTRSKADNYAAQRARDFHVGWFLHPIRYGEYPRTMQEIVGKRLPKFTEEEVKMVNGSFDYVGINQYTTSYISNPTTPSNVTSYQSDWNAAFANAKYGVQIGPRANSWWLYIVPWGMYKTVTYIKERYGDM…	74.15	0	gi|356531160|ref|XP_003534146.1|	PREDICTED: beta-glucosidase 44-like [Glycine max]	lin0391
2397	CotAD_06468	35303.2	0.179	1|1|1	4|5|8	1.52	0.103	0.001|0.246|0.003	CotAD_06468	MESKEEVFSVELPAPASWKKMFSPKKVGSPRKTEIMFIAPTGEEISSRKQLEQYLKSHPGNPPITDFDWGTGETPRRSARISEKAKTAPTPEKEPPKKRGRKSLSAKKENKETEAVPEKSEGEKENEKEDAPATEKETAAAEREKDTSIETQVQDGGKTEVADQTGHADTKMDEAGTDVKVPETAEAGKKEEAAGTEETPTAMEVQEKPAEASCTDGTQTAKEGEAPTEKVPQTQAEENGTCEKQPENPETVTLEANGGVEKENPNGAVPVSEGEAKETQGLQEVAGKCSVEVEDKGKAVDGEVIENGKVKEGGKADTPQPTGSAPASN	100	9e-72	gi|151368154|gb|ABS10812.1|	DNA binding protein-like protein, partial [Gossypium arboreum]	-
2425	CotAD_60683	17560.4	0.135	2|2|2	55|40|35	1.24	0	0.001|0.001|0.001	CotAD_60683	MAAAAASASMSATAVLIPRVPAAVRTTHCSALPPVPPRVSTASFSSSVKLTPESRRFPFLQTKATEDTSVDTGELFDDLKEKWDKVENKTTVLLYGGGAIVAVWLSSILVGAINSVPLLPKIMELVGLGYSGWFVYRYLLFKSSRKELATDIEALKKKIAGTE	72.9	2e-72	gi|388500696|gb|AFK38414.1|	unknown [Lotus japonicus]	-
2439	Cotton_D_gene_10006229	15487.5	0.229	1|1|1	9|10|13	1.55	0.098	0.001|0.004|0.076	Cotton_D_gene_10006229	MVKAVAVLSSNEGVSGTVFFSQEGDGPTTVTGNLSGLKAGLHGFHVHALGDTTNGCMSTGPHFNPAGKEHGAPEDENRHAGDLGNVTVGDDGCASFSITDKQIPLTGPNSIIGRAVVVHADPDDLGKGGHELSKSTGNAGGRVACGKLSISIT	96.03	2e-101	gi|211906512|gb|ACJ11749.1|	copper/zinc superoxide dismutase [Gossypium hirsutum]	PM1952
2443	CotAD_25402	36235.4	0.184	2|2|1	26|20|10	1.17	0.004	0.001|0.057|0.020	CotAD_25402	MASKLAFTLMPPRFFTVTIQKPVVCFSSSSSSSIRFQPSGKHLCFRRRLLLLPLKATADQQGQVEEDEVVDSKILPYCSIDKKEKKSLGEMEQEFLQALQAFYYEGKAIMSNEEFDNLKEELMWEGSSVVMLSSDEQKFLEASMAYVSGKPILSDEEFDELKMRLKMEGSEIVVEGPRCSLRSRKVYSDLSVDYLKMFLLNVPATVIALGLFFFLDDLTGFEITYLLELPEPFSFIFTWFAAVPLIVYLAQSLTKVVVKDSLILKGPCPNCGTENVSFFGTILSISSGGTTNTLKCSNCETTLGYNAKTRLITLPEGSQA	76.69	3e-165	gi|225426724|ref|XP_002282120.1|	PREDICTED: PGR5-like protein 1A, chloroplastic-like [Vitis vinifera]	-
2448	Cotton_D_gene_10004219	18414.1	0.053	-|-|1	-|-|3	1.53	-	-|-|0.043	Cotton_D_gene_10004219	MAEALAPASPGGGSHESGEQSPKSNVREQDRFLPIANISRIMKKALPANGKIAKDAKETVQECVSEFISFITSEASDKCQREKRKTINGDDLLWAMATLGFEDYIDPLKIYLSRYREGDAKGSAKGGDASAKKDVQPGPNGQLVHQGSFSQGVNYGNSQAHLMLPMQGTD	80.81	8e-93	gi|449440059|ref|XP_004137802.1|	PREDICTED: nuclear transcription factor Y subunit B-8-like [Cucumis sativus]	ECU11g0730
2466	CotAD_30667	36815.5	0.173	3|3|4	19|11|11	1.17	0.003	0.001|0.185|0.001	CotAD_30667	MADQPQIYELNNGTVVVKITNYGCTITSLSVPDKNGKLADVVLGFDTVEPYVKGASPYFGCIVGRVANRIKNGKFTLNGTEYTLPINKPPNSLHGGFKGFDKRIWEVAEYKKGDKPSITFKYRSSDGEEGYPGDVSVTATYTLTSSMTMKLDMEAVPENKATPINLAQHTYWNLAGHNSGNILDHTIQIWASEMTPVDENTVPTGEIKPVKGTPFDFTAEKKVGLQVHEVGLGYDHNYVLGGGEEKLGLKRAAKLKDPSSSRVLNLWTNAPGMQFYTGNYVNGVVGKGGAVYNKHAGLCLETQGFPNAINQSNFPSVVVQPGSKYQHTMLFEFSVE	81.9	0	gi|224118626|ref|XP_002317867.1|	predicted protein [Populus trichocarpa]	SPBPB2B2.12c_2
2476	CotAD_31787	98835.8	0.05	1|1|1	6|9|4	2.12	0.04	0.001|0.001|0.026	CotAD_31787	MWEGLIQKAKNGGLDVIDTYVFWNLHEPSPGNYNFEGRYDLVQFIKLVKKAGLYVHLRIGPYICGEWNFGGFPVWLKYVPGIKSKLYGPAGKAYVKWAAKMAVGLNTGVPWVMCKEYDAPDPYHGGTNFGRTAGGPFITTSYDYDAPIDEYGLIRQPKYDHLKELHKAVKLCEKALLNSDPNIVILGSYEKAHVFYSESGGCAAFLSNYNLRSNAKVTFNNMHYNLPRWSISILPDCQNVVFNTAKLIHCNVTYDRKAIAIDGQKRILFSGSIHYPRSTPEMWEGLIQKAKNGGLDVIDTYVFWNLHEPSPGNYNFEGRYDLVQFIKLVKKAGLYVHLRIGPYICGEWNFGGFPVWLKYVPGISFRTDNEPFKKAMAKFTQKIVQMMKDENLFESQESK…	63.05	0	gi|114217397|dbj|BAF31234.1|	beta-D-galactosidase [Persea americana]	CAC2514
2478	CotAD_33515	53522.3	0.151	3|3|4	4|4|6	1.34	0.002	0.018|0.016|0.001	CotAD_33515	MGEETECCRTKGPGYETPLKAMSGPKEALLYVTCVYTGTGREKPDFLATVDVDPNSPTYSKVIHRLSMPYVGDELHHSGWNACSSCHGDPSADRRFLILPSLVSGRVYVIDTQKNPKAPSLQKVVQPEDIVKNTGLAYPHTSHCLASGDIMISCLGDKDGNAKGNGFLLLDSEFNVKGRWEKPGHSPMFGYDFWYQPRHKTMISSSWGAPVAFTKGFDLQHVTDGLYGRHLHVYSWPDGELKQTLDLGDTGLIPLETRFLHDPSKDTGYVGCALTSNMVRFFKTKDGSWSHEVAISVKPLKVQNWILPEMPGLITDFLISLDDRFLYFANWLHGDVRQYNIEDPKNPVLVGQVWVGGLIQKGSPVVAMTEDGKTWQSDVPEIQGHRLRGGPQMIQLSLD…	86.99	0	gi|255559184|ref|XP_002520613.1|	selenium-binding protein, putative [Ricinus communis]	-
2484	CotAD_03742	29008.4	0.191	4|3|3	17|13|19	1.25	0.004	0.001|0.002|0.001	CotAD_03742	MTHFVLVHGMCHGAWCWYKIVSLLQSGGHRVTPLDLGASGINPKTITDLASLSDYAEPLMALMASLPQDEKVILVGHSYGGVIISLAMESFPMKVLAAVYLTAFMPNHDSPIATGVAEYFRRVMAEPLMDFQLLFEDGSENPPTHALFGPKYMEAMVYQLSPKEDIELANTLLRQGKWFMKDLSKESLLSKEKFGSVDRVYIVCEDDLLIKESLQKWYIENSPTDDVKVIAGADHMAMFSKPQEVCKCLQEVAEKYN	59.69	1e-110	gi|359496065|ref|XP_002263026.2|	PREDICTED: polyneuridine-aldehyde esterase-like [Vitis vinifera]	mll2018
2490	CotAD_25040	16533.6	0.32	2|2|2	11|10|11	1.64	0.003	0.001|0.002|0.001	CotAD_25040	MSISCALKVVPIVLLLVLFALANAKKSADVTELQIGVKYKPPSCEFQAHKGDRVKVHYRGKLTDGKVFDSSFERGDPIEFELGSGQVIKGWDQGLLGMCVGEKRKLKIPAKLGYGEQGSPPTIPGGATLIFDAELVSVNGKPSSGEDTSEDEL	88.19	1e-77	gi|255587693|ref|XP_002534360.1|	fk506-binding protein, putative [Ricinus communis]	YML074c_2
2494	Cotton_D_gene_10019262	19637.4	0.351	5|5|4	31|24|16	1.58	0.011	0.001|0.001|0.001	Cotton_D_gene_10019262	MLKQFSLVFFVLLACYNGVNSQELKHITKELEVNAPASEAWELYRKLGLLKLIDLKLTNIFQSTEVLKGDGGVGTVVKLTFVPGNSSYTEKFTVMDDQRRVKETKGLEGDCLAIGCSVQILEFEIIEKSQNSSIIKSTISYAVKEEFQAKDPKPSIQIVEAIVQSSKKFLERNN	46.36	1e-33	gi|351727799|ref|NP_001237429.1|	uncharacterized protein LOC100305838 [Glycine max]	-
2504	Cotton_D_gene_10029255	25074.1	0.178	4|2|2	5|2|5	1.62	0.049	0.087|0.174|0.001	Cotton_D_gene_10029255	MASMASSPSFLYYNKYISKSKARILPRIVLSQSSQLPDDKPHHQLPRREIILRSSELAVIGAIFSFSGKKPEYLGVQKNPPSLALCPATNNCISTSENVTDLTHYAPPWNYNGGRNRKKPVNREVAMEELLQVIKSTKPDKYTPKIVEKKDDYVRVEYQSPILGLVDDVEFWFPPGKDSIVEYRSASRIGNFDFDINRKRIKALRVELEKKGWASVETF	74.09	2e-114	gi|462415785|gb|EMJ20522.1|	hypothetical protein PRUPE_ppa019578mg [Prunus persica]	all4479
2512	Cotton_D_gene_10032966	39853.6	0.15	4|5|5	34|33|33	1.63	0	0.001|0.001|0.001	Cotton_D_gene_10032966	MASPSFFFAIFLLLLSTVHPKVIAVEQLSDVKLNSRILQDSIVKQVNQNPKAGWEAALNPRFSNYTIGEFKHLLGVKPTPKKELLGVPILTHDKSLKLPTSFDARTAWPQCTSIGRILDQGHCGSCWAFGAVESLSDRFCIHFDMNISLSVNDLLACCGFLCGDGCDGGYPISAWRYFVRSGVVTEECDPYFDDIGCSHPGCEPAFPTPKCVRKCVKGNLLWKQSKHYSVGAYRIKSNPADIMAEVYKNGPVEVSFTVYEDFAHYKSGVYKHLTGDVMGGHAVKLIGWGTSDDGEDYWLLANQWNRGWGDDGYFKIKRGVDECGIESDVVAGLPSTKNLVRQVTDTGIVEDASF	78.93	0	gi|224064400|ref|XP_002301457.1|	predicted protein [Populus trichocarpa]	MA2507_1
2525	CotAD_07289	47755.1	0.232	1|2|1	4|4|1	1.27	0.034	0.039|0.861|0.643	CotAD_07289	MLGALRRKVAIGGSSASVSGKAIRPIISASRVSVNVGEEILLLQPRGIAHVRNFSHLILPGCSVGLAKTRDVFSSIQSETIMQKSCRAFSSGGGDLVDAVVPFMGESISDGTLATFLKKPGDSVAADEPIAQIETDKVTIDVVSPQAGVIQEVIFQQFWIYGSHLHACMHVDKPKAKVEASPAAEKPKPPSSPPPKRTATEPVLPPKERERRVPMTRLRKRVATRLKDSQNTFAMLTTFNEVDMTNLMKLRSDYKDAFVEKHGVKLGFMSGFVNAAVSALQHQPIVNAVIDGDDIIYRDYVDISIAVGTPKGLVVPVVRDADKMNFAEIEKTINNLAKKANDGTISIDEMAGGSFTISNGGVYGSLLSTPIINPPQSAILGMHSIVSRPMVVGGNVVPR…	67.94	0	gi|460397090|ref|XP_004244101.1|	PREDICTED: dihydrolipoyllysine-residue succinyltransferase component of 2-oxoglutarate dehydrogenase complex 2, mitochondrial-like [Solanum lycopersicum]	PA1586
2528	CotAD_26664	25162.3	0.148	3|-|2	3|-|3	1.46	-	0.046|-|0.131	CotAD_26664	MATSRPYSSHSTAPSAPELPPQSYDDHHQPPQQHQQHQSYYGQYPTPSPPPSSSSSYGPSGGGFPAGTSPDVIRAFQMVDRDRSGFIDEYELQQALSSGYQRFNLRTIRLLMFLFKNPYDSLRIGPMEFAALWSCLGHWRAVFERFDRDRSGKIDLMELRDALYSLGYAIPPSVLQLLISKCGMIVKGLTEKFKEKDPGYTGSATLSYDSFMSLVIPFLVSYD	76.33	2e-87	gi|225464942|ref|XP_002275521.1|	PREDICTED: probable calcium-binding protein CML48 [Vitis vinifera]	-
2539	Cotton_D_gene_10003001	54240.8	0.113	4|-|3	6|-|7	1.41	-	0.013|-|0.010	Cotton_D_gene_10003001	MGSHCESSVKIPPIKFTKLFINGNFVDSISGKTFDTIDPRTGEVITKVSLGDREDVDLAVKAARHAFDYGPWPRMSGSERGRMMMKLADLIEENVEEIAALDAVNGGKLFTLCKAIDIPGAARTLRYYAGAADKIHGTVLKMSKGLQGYTLREPIGVVGSIIPWNFPTTMFFMKAAPALAAGCTLVVKPAEQTPLSALYYAHLAKLAGIPDGVLNVVNGFGETAGAAISAHMDIDKVTFTGSTEVGRKIMAAAAASNLKPVSLELGGKSPLLIFDDADIDQAADIAFRGMFYNKGEICVASSRVYVQEGIYEKLVKKLVEKAKATVVGDPFDPQVNQGPQTDKKQFEKILSYIEHGKREGATLLTGGKHVGQKGYYIEPTIFTDVNEDMIITKEEIFGP…	77.85	0	gi|255546541|ref|XP_002514330.1|	aldehyde dehydrogenase, putative [Ricinus communis]	ZbetB
2540	Cotton_D_gene_10015672	17300.5	0.572	1|1|-	2|1|-	3.24	-	0.020|0.001|-	Cotton_D_gene_10015672	MGVVTYDYESTSPVAPSRLFKAFTVEAPKVWPTAAPNAVKSIEVEANPSSGSIVKINFVEGLPFQYMKHQIGGHDESNFSYSYDLIEGGPLGDKLEKISYENKFEAAAGGGSICKSSMKFYTVGDNVITEDEIKALIKGSEGVYKPVEAYLLANPESCN	98.11	7e-113	gi|10505374|gb|AAG18453.1|AF305066_1	PR protein class 10 [Gossypium hirsutum]	-
2551	Cotton_D_gene_10037535	38799.9	0.162	2|3|3	6|6|4	1.48	0.001	0.004|0.020|0.091	Cotton_D_gene_10037535	MSKNILVTGGAGYIGSHTVLQLLLGGYKVVVADNLENSSAVAIKRVEELAGQFGRNLSFRQVDLRDRSVIQKLFAETKFDAVIHFAGLKAVGESVEKPLLYYDNNVIGTITLLEVMAAHGCKNLVFSSSATVYGWPKEVPCTEESPLSAVNPYGRTKLFIEEICRDVHHSDPEWKIILLRYFNPVGAHPSGHIGEDPRGIPNNLMPFVQQVAVGRRPALTVFGNDYATKDGTGVRDYIHVVDLADGHIAALRKLSDPKIGCEVYNLGTGKGTSVLEMVAAFERASGKKIPLVMAGRRAGDAEIVYASTKKAERELNWRARYGIEEMCRDQWNWASKNPYGYGSPESNGVMK	84.48	0	gi|460399972|ref|XP_004245510.1|	PREDICTED: UDP-glucose 4-epimerase GEPI48-like [Solanum lycopersicum]	BH1108
2573	Cotton_D_gene_10006798	21966.2	0.258	1|2|1	1|5|2	3.13	1.612	0.043|0.001|0.056	Cotton_D_gene_10006798	MKTALFLAITSLVLGSTIASDEFDPVLDISGQELRTGIDYYILPVIRGRGGGLTLASTGNETCPLDVVQEQQEVSNGLPLTFSPVNVTQGVVRVSTDLNIKFSAASICVQTTLWTLRFDESVQKYVVTTGGVEGNPGRETLSNWFKIQKFEDDYRLVYCPTVCNFCRPVCGALGVFMDGGTRRLAISDEPLKVMFKRA	72.68	5e-101	gi|147805678|emb|CAN65022.1|	hypothetical protein VITISV_027379 [Vitis vinifera]	-
2577	CotAD_62314	26282.1	0.084	1|1|2	2|4|2	1.94	0.155	0.126|0.014|0.090	CotAD_62314	MAASLIAKTAMFQLSKAFPRTVSLRSSANVSRVCFTTTASKRSEGRDTKAGFAYREKDISSDEDTTAEEAMERAKEYAHNAKEKTKGAFDTAADRAKDATNRAAETAQSANEKTKQKAREYAQGTKETAQSAKDKTKEGADKASQTAYELKEKSKERAQGVMEKSEEIAGSVADKASETIQNVGEKAKQTAQGAWDAAKGTTQKIKETVVGKSEEEKRMDDDVVELRRRARRESDESKY	43.73	3e-44	gi|359497375|ref|XP_002280134.2|	PREDICTED: desiccation-related protein PCC3-06-like [Vitis vinifera]	-
2579	CotAD_08788	37749.7	0.316	1|-|-	5|-|-	1.8	-	0.003|-|-	CotAD_08788	MAIQIPRVKLGTQGFEVSKLGFGCMGLSGHNNSVSDEAGIAIIKHAFERGITHFDTADMYGPKTNEILVGKALKHLPREKVQLATKFGVESMGPGGPVINGTPEFVRSSLEASLQRLDVDYIDLYYIIRVDHKTPIEDTMEELKKLVEEGKIKYIGISEASPETIRRAHAVHPLTAVQLEWSLWTRDVEEEIIPLCRELGIGIVPYSPLGRGFFAGRANKDTSNTPLRMFPRFSGENLEKNRILYSKVEKLAEKHGCTAAQLALAWVLLQGDDVAPIPGTTKIENLDSNIESVKVKLTKEDLKEIIDTIPIHEVAGSNYPDSLKQFTWKYGNTPPKKST	70.41	1e-165	gi|225451316|ref|XP_002278850.1|	PREDICTED: auxin-induced protein PCNT115 isoform 1 [Vitis vinifera]	ECs0473
2601	CotAD_64667	94854.1	0.178	2|2|2	8|3|2	1.64	0.02	0.001|0.010|0.003	CotAD_64667	MAMVLNSKLPVVLNALLVVLLAISGVCLVSGSVSYDHKAITINGQRRILLSGSIHYPRSTPEMWPDLIQKAKEGGLDVIRTYVFWNGHEPAPGKYYFQGNYDLVKFIKLVQQAGLYVHLRIGPYVCAEWNFGGFPVWLKYIPGIIFRTNNGPFKAQMQRFTKKIVDMMKAERLYESQGGPIILSQIENEYGPMEYELGAPGKAYSYWSAKMAWGLATGVPWVMCKQDDAPDPIINTCNGFYCDYFSPNKANKPKMWTEAWTGWYTEFGGAVPYRPAEDLAFSVARFIQKGGSFVNYYMYHGGTNFGRTAGGPFIATSYDYDAPLDEYGLKRQPKWGHLKDLHRAIKLCEPALVYGDPTMIRLGNYQEAHVFKYKAGGCAAFLANYNSRDYATVSFRNNH…	86.6	0	gi|255572957|ref|XP_002527409.1|	beta-galactosidase, putative [Ricinus communis]	PAB1349
2604	Cotton_D_gene_10025760	99868.1	0.07	1|1|2	7|4|5	1.38	0.003	0.001|0.003|0.001	Cotton_D_gene_10025760	MGAQRNVLPILFLALISFLTHSVLTQRVTINSQTERRALLDLRSSLGLRGKDWPIKTDPCTTWTGIRCQNGTVTNITVSGLRRTRIGRLYPRFNVDSLVNLTRLISFNASGFHLPGSIPDLFGNRLVHLEVLDLRSCNISGSIPSSLGNSFRLSSLYLSNNNLAGSIPSVLGELKNLKSLDLSINSLTGSIPSSFGSLINIEKLQLSSNYLSGSIPLSLSSLKALKVLNVSDNNLSGSIPVQFSNLSKLLELDLSKNSLYGSLPVEFTMLKSLQKMIIENNELDGRLPVDLFSNLVELQVVDLSGNKLDGNVNGSFWSMPNLTFFDVSNNNFSGHLPAPSSNHSVAPGAVFNLSNNQFYGTLDFSLGMFKFIDVSGNYLQGIVNDGERNASVNMNCFYR…	62.86	0	gi|255538650|ref|XP_002510390.1|	lrr receptor protein kinase, putative [Ricinus communis]	SPy1798
2606	Cotton_D_gene_10029659	37349.4	0.18	1|5|5	6|17|15	1.23	0.017	0.011|0.011|0.049	Cotton_D_gene_10029659	MARQASRLIQSLSSRISPHKPQLSPLTPSSSSSQLLTQSRSFSAAPAPQPAVFVDKNTRVICQGITGKNGTFHTEQAIEYGTKMVGGVTPKKGGTEHLGLPVFNSVAEAKAETKANASVIYVPPAFAAAAIMEAMEAELDLVVCITEGIPQHDMINADIFTPQVRVKAALNQQSKTRLIGPNCPGIIKPGECKIGIMPGYIHKPGRVGIVSRSGTLTYEAVFQTTAVGLGQSTCVGIGGDPFNGTNFVDCVTKFLADPQTEGIILIGEIGGTAEEDAAALIKESGTEKPIVAFIAGLTAPPGRRMGHAGAIVSGGKGTAQDKIKTLREAGVTVVESPAKIGVAMHEVFKQRGLLN	91.77	0	gi|449439511|ref|XP_004137529.1|	PREDICTED: succinyl-CoA ligase [ADP-forming] subunit alpha-1, mitochondrial-like [Cucumis sativus]	CPn0974
2607	Cotton_D_gene_10021424	60913.5	0.229	2|1|1	2|5|4	1.38	0.016	0.003|0.031|0.002	Cotton_D_gene_10021424	MMIMTRYALLLLLAFASLQLLCFAADDDVVFYDSFEESFDGRWIVSDKDDYKGVWKHSKSEGHDDYGLLVSEMAKKYAIVKELDEAVNLKDGTTVLQFETRLQGGLECGGAYLKYLRPQDAGWKPKEFDNESPYSIMFGPDKCGATNKLHFILKHKNPKSGEYIEHHLKYPPSVPSDKLTHVYTAILKPDNEVSILIDGEEKKKASFLSAEDFEPPLIPSKTIPDPDDKKPEDWDERAKIPDPDAVKPEDWDEDAPMEIEDEEAVKPESWLDDEPEEIDDPEATKPEDWDDEEDGEWEAPKIENPQCEIAPGCGEWKRPMKRNPAYKGKWSPPLIDNPSYKGIWKPQEIPNPNYFELEKPDFDPIAAIGIEIWTMQDGILFDNILIAKNDKVAESYRET…	82.4	0	gi|351727521|ref|NP_001235116.1|	calnexin homolog precursor [Glycine max]	-
2612	CotAD_12111	51245	0.344	2|2|2	3|3|5	1.68	0.058	0.140|0.031|0.001	CotAD_12111	MEKLCNFNHEFIIVHLLLFSSLLSFTNPTPSPTQDEQSQIISRFQEYLRINTSQPSPDYKKSTQFILTLAESLSLQTQVIEFVQGKPLVILKWPGFDLSLPSILLNSHTDVVPSESSKWDYHPFGAHIDENGNIFARGSQDMKCVGMQYMEAVRRLKASGFQPKRSLYLSFVPDEEIGGHDGLEKLAQSDVFKSMDVDIILDEGLASPNENYRLFYGERTPWWLVIKATGAPGHGAKLYDNSAMENLFKSIESIRRFRASQFDLVKAGLKGEGEVISVNMAFLKAGTPSPTGFVMNLQPSEAEAGFDIRIPPTVNAEFLEKRIAEEWAPASRNMSFEFKQKGSTQDYWGRPLITATDRSNPWWALLVEAIKKANGKIGKPEIFPAATDSRYFRQQGLRA…	74.82	0	gi|118486005|gb|ABK94846.1|	unknown [Populus trichocarpa]	Cgl2768
2618	Cotton_D_gene_10036321	12436.1	0.333	1|1|1	15|14|16	4.03	0.545	0.001|0.001|0.001	Cotton_D_gene_10036321	MASSMSLKLACVVVLCMVVGAPLAQGTVTCGQVTGSLAPCINYLRGNGAGAVPQGCCSGIKSLNSAAQTTPDRQAACKCIKSAAAGIPGINYGIASGLPGKCGVNIPYKISPSTDCSRVK	100	6e-80	gi|7012719|gb|AAF35184.1|AF195863_1	lipid transfer protein precursor [Gossypium hirsutum]	-
2619	Cotton_D_gene_10004068	23185.1	0.275	3|2|1	7|2|2	1.88	0.082	0.041|0.053|0.024	Cotton_D_gene_10004068	MAAMVSAYFFVFLALFGMVASDPDHLQDLCVANKAAGIKVNGFPCKEEANVTEADFFFSGLANPGVINNSVGSVVTGANVEKIPGLNTLGVSLARIDYEPGGLNPPHTHPRATEIIFVLDGELDVGFITTSNKLISKSVKKGDIFVFPKGLVHFQKNNGEKPASVIAGFNSQLPGTQSIAATLFTSTPPVPNNVLTKAFQIGTKEVDKIKNKLAPKKS	79.36	2e-124	gi|118484187|gb|ABK93974.1|	unknown [Populus trichocarpa]	sll1358
2621	CotAD_66529	55587.2	0.262	3|3|3	19|13|15	1.28	0.01	0.001|0.003|0.001	CotAD_66529	MGMMRLSKCLVSLLFLVALSGFTHGFVMSPHTLLNRLSQNSNYYLTTEEHWFDQTLDHYSPYDHRQFKQRYYEFLDNFQVPDGPIFLKICGESSCSGISNDYLGVLAKKFGAAVVSLEHRYYGKSSPFKSHTTENLKYLSSKQALFDLAVFRQWYQESLNLKRNKTGAENSWFVFGISYSGALSAWFRLKFPHLTCGSLASSGVVLAVYNYTDFDKQVGESAGPECKAVLQEISELVDRSLESNRKELKKQFGAAELEIDGDFLYFLADAAVIAFQYGNPDALCTPLVEAKKAGEDLVAAYAKYVKDFYVGTFGVSVETYNQNHLKNTAVNEGNSDRLWWFQVCTEVAYFQVAPSNDSIRSTKINTKYHLDLCKNVFGEGIYPEVDMTNIYYGGTKIAG…	81.51	0	gi|255581402|ref|XP_002531509.1|	catalytic, putative [Ricinus communis]	-
2622	Cotton_D_gene_10021702	49171.9	0.053	2|1|-	5|1|-	1.24	-	0.016|0.874|-	Cotton_D_gene_10021702	MADGHESDKNIEIWKIKKLIKALEAARGNGTSMISLIMPPRDQISRVTKMLGDEFGTASNIKSRVNRQSVLGAITSAQQRLKLYSKVPPNGLVLYTGTIVTDDGKEKKVTIDFEPFRPINASLYLCDNKFHTEALNELLESDDKFGFIVMDGNGTLFGTLSGNTREVLHKFSVDLPKKHGRGGQSALRFARLRMEKRHNYVRKTAELATQFFINPSTSQPNVSGLILAGSADFKTELSQSDMFDQRLQAKILNVVDVSYGGENGFNQAIELSSEILANVKFIQEKRLIGKYFEEISQDTGKYVFGVDDTLKALEMGAVETLIVWENLDINRYQLKNSTTGEITIKHLNKEQEANESNFRDPVSSADLEVVEKMPLLEWFANEYRQFGCSLEFVTNKSQE…	94.5	0	gi|255543296|ref|XP_002512711.1|	eukaryotic peptide chain release factor subunit, putative [Ricinus communis]	PAE2906
2636	Cotton_D_gene_10038223	72586.4	0.421	10|8|9	73|55|84	1.18	0.001	0.001|0.001|0.001	Cotton_D_gene_10038223	MATAALLRSFRRRDVAASPLSAYRCLTNNGKTSAGINWTSFCRAFSSKPAGNDVIGIDLGTTNSCVAVMEGKNPKVIENSEGARTTPSVVAFNQKGELLVGTPAKRQAVTNPTNTVFGTKRLIGRRYEDPQTKKEMGMVPFKIVKAPNGDAWVEANGQQYSPSQIGAFILTKMKETAEAYLGKGVSKAVITVPAYFNDAQRQATKDAGRIAGLDVERIINEPTAAALSYGMNNKEGLIAVFDLGGGTFDISILEISNGVFEVKATNGDTFLGGEDFDNALLDFLVSEFKKTEGIDLSKDRLALQRLREAAEKAKIELSSTSQTEINLPFITADASGAKHLNITLTRSKFESLVNHLIERTKAPCKNCLKDAGISTNDVDEVLLVGGMTRVPKVQEVVSG…	90.11	0	gi|462397203|gb|EMJ03002.1|	hypothetical protein PRUPE_ppa001973mg [Prunus persica]	NMA0736
2637	CotAD_73495	12684.4	0.17	1|1|1	7|6|12	1.41	0.002	0.001|0.005|0.001	CotAD_73495	MAQQQAQVKFTAVKPQLMVKTPKAVDAVNFYKSAFGAVEAGRSPCCPPPTAEQNLPNILCAQLELAGFSFVVYNDDSAPYDLYLFISFLSIFIDEYSISSTIYLNKILYYYL	56.72	9e-17	gi|255572644|ref|XP_002527255.1|	conserved hypothetical protein [Ricinus communis]	-
2643	Cotton_D_gene_10021215	29908.2	0.491	1|1|1	16|7|5	1.35	0.033	0.001|0.028|0.001	Cotton_D_gene_10021215	MASSSFLLESPASIFSSSSIKAPLYLPKPYPFIVSVKRRRPERKRNPVLKSAVGDVSVVDTPPPPPPPPQDAKSELISSLKLKLLGIVSGLNRGLAANQDDLGKADDAAKELETVAGPVDLLTDLDKLQGRWKLIYSSAFSSRTLGGSRPGLPTGRLLPVTLGQVFQRIDVISKDFDNIAEIELGAPWPLPPLEVTATLAHKFEIIGSSKIKITFEKTSVKTRGTFSQLPSLDVPRIPDALRPPSNPGSGDFDVTFIDADTRITRGDRGELRVFVIS	99.28	5e-163	gi|38679313|gb|AAR26478.1|	harpin binding protein 1 [Gossypium hirsutum]	-
2648	CotAD_66997	17337.6	0.478	1|1|-	8|2|-	2.32	-	0.001|0.090|-	CotAD_66997	MGVVTYDYENTSPVAPARLFKAFTVEAPKVWPTAAPNAVKSLEVEANPSSGSIVKINFVEGLPFQYMKHQIGGHDESNFSYSYDLIEGGPLGDKLEKISYENRFEAAAGGGSICKSSMKFYTIGDNVITEDEIKALIKGSEGVYKPVEAYLLANPEACN	98.11	1e-113	gi|10505374|gb|AAG18453.1|AF305066_1	PR protein class 10 [Gossypium hirsutum]	-
2654	CotAD_24383	26735.4	0.357	7|5|6	66|97|103	3.14	0.451	0.001|0.001|0.001	CotAD_24383	MGIKQFIGYALAVLASLVVSAQGSDFAFYKLSLIWPTSACYPLANCKTPIPTFFTIHGLWPTFANDTAVPAYGPNNRCNANPVGPDAAVARLTPIQDRLNQRWPNLRAGVENSVFWRHEWQNHGMCSDYPQDPLSYFNDTLNLATSTKFDPFKALGVQPSNTPYLLNTLLQNVYKNVGAYPQILCSQRTGGALYLREIRFCLTRTNKTPPSVVQSCPTRVAGGCRDPLTNNVHFPPAS	36.41	2e-24	gi|357493387|ref|XP_003616982.1|	S-RNase [Medicago truncatula]	-
2656	CotAD_51866	39686.9	0.082	2|2|-	5|4|-	1.66	-	0.027|0.005|-	CotAD_51866	MDTPTPLFSLLCFFLFSLFLGEEQHVVEGSRVWTFGFRPKMLFVFGDSYADTGNNRKALASSWKLPYGITFPGKPAGRFSDGRVLTDFIAGYLAIKTPVPYRYRKELGGRLKYGLNFAYGGTGVFDTPAPEPNMTTQIDFLQQLLNDSVYPKRALKTSVALVSLAGNDYSNYIATNGSTAGFPVFIGRVVNQMKVNLKRIHNLGVRKIAASALQPLGCLPRSTAQFSFEQCNESENALVGLHNQLLAQAVNDLNKETNSSSFFVLDIYNAFWNVFNQKQAHQVSPTFVNPFEPCCVGVSAAFSCGSVDENGVKQYTLCSNPKSKFFWDTVHPTEQGWRAVYSTPALQSSLKQFW	64.58	1e-155	gi|255575625|ref|XP_002528712.1|	carboxylic ester hydrolase, putative [Ricinus communis]	all3634
2657	CotAD_69868	43022.1	0.046	2|-|-	9|-|-	1.55	-	0.005|-|-	CotAD_69868	MVTVEEVRKAQRAQGPATVLAIGTSTPPNCVDQSTYPDYYFRITNSEHKTELKEKFKRMCEKSMIKKRYMYLTEEILKENPNVCEYMAPSLDARQDMVVVEVPKLGKEAATKAIKEWGQPKSKITHLVFCTTSGVDMPGADYQLTKLLGLRPSVKRLMMYQQGCFAGGTVLRVAKDLAENNKGARVLVVCSEITAVTFRGPSDTHLDSLVGQALFGDGAAAVIIGADPMPEIEKPMFEIVSVAQTILPDSDGAIDGHLREVGLTFHLLKDVPGLISKNIEKSLVEAFQPLGISDWNSLFWIAHPGGPAILDQVEAKLALKPEKLRATRHVLSEYGNMSSACVLFILDEMRKKSREDGLQTTGEGLEWGVLFGFGPGLTVETVVLHSVAA	100	0	gi|197259944|gb|ACH56521.1|	chalcone synthase [Gossypium hirsutum]	MT1698
2689	CotAD_71524	62581.1	0.018	-|1|1	-|2|1	4.2	-	-|0.045|0.076	CotAD_71524	MLTAHQIIYENTRFTWRQTYERCCRLASSLLSLNILKNDVISVLAPNVPAMYEMHFAVPMAGAVLNTINTRLDAKNVATILRHSEAKVFFVDYQYVPLAREALRLLMVDSQQNQTSQSPSAAPESFIPLVIVIDDVDSPKGVRLGELEYEQLIHMGNPRFVPTEIQDEWNPISLNYTSGTTSEPKGVVYSHRGAYLSTLSLILGWEMGSEPVYLWSLPMFHCNGWTFTWGVAARGGTNVCLRNTTAYDMYRNIASHKVTHMCCAPIVFNILIEAKPHERREFTSTVQVLTGGAPPPASLLEKMELLRFHVTHGYGLTEATGPALVCEWQAKWNNLPRDSQAKLKARQGISVLTLADVDVKNMKTMTSVPHDGKTMGEIVLRGSSIMKGYLKDPETTSKA…	75.53	0	gi|225466273|ref|XP_002272437.1|	PREDICTED: medium-chain-fatty-acid--CoA ligase [Vitis vinifera]	MTH657
2695	Cotton_D_gene_10000739	38062.7	0.216	6|5|-	16|10|-	1.23	-	0.005|0.003|-	Cotton_D_gene_10000739	MKQKRMKKIKSKTYHRLKNKDKLKVESAEMLMDPEAAKEQARKQEFKRDEERMTLKHKNKSKWARHILEGGLNAQDEGTRAAMAEQLHRHALLTRKIDTVKDSSSDDNDEGSNEDRASELLGKAKDKTLKVQNAVGRHPEVKWAQRTDKVFITVLLPDSKNAKVNLEPEGVFNFSATAGTDNNTYELKLDLFDKVNVEESKINIGVRSIFCILEKAEKVWWKKLLRGDGKAPHYVKVDWDKWVDEDEDKGLGDLDLGGMDFSNFGGMGGMGDMMGGMGGMGGMGGMGDMMGGMGGMGGMDEFEDSDDEGQEVTKPDDKAEGDAKPEEHGIGSSEKKEAEPST	85	1e-56	gi|462396743|gb|EMJ02542.1|	hypothetical protein PRUPE_ppa011992mg [Prunus persica]	SPAC57A7.06
2696	Cotton_D_gene_10008000	40568.4	0.115	3|3|3	13|15|8	1.23	0.001	0.001|0.020|0.016	Cotton_D_gene_10008000	MENSFTLVTIFGLLFTLGNVGPQAEAARAFFVFGDSLVDNGNNNYLATTARADAYPYGIDYPTHRATGRFSNGLNIPDLISEQIGSEPTLPYLSPELNGQRLLIGANFASAGIGILNDTGVQFVNIIRIGEQLQYFRQYQQRVSALIGPEQTQRLVNEALVLMTLGGNDFVNNYYLVPFSARSRQFALPDYVVYIISEYRKILLRLYELGARRVLVTGTGPLGCVPAELAQHSRAGECAVELQRASALFNPQLAEMLSGLNAELGSDIFVAVNTNEMHMDWINNPQQFGFVTSKVACCGQGPYNGIGLCTIASNLCPNRDIYAFWDPFHPSERANKLIVQQIITGSTKYMHPMNLSTIMELDSRV	81.32	0	gi|255562023|ref|XP_002522020.1|	zinc finger protein, putative [Ricinus communis]	all3634
2697	Cotton_D_gene_10022859	100749	0.314	2|1|3	5|3|6	1.22	0.011	0.004|0.615|0.079	Cotton_D_gene_10022859	MAKVLAQSTIVPSLVTSRSHGRSTGKSKRSVKMMSSLPTPGLRINSFSGLRGSTSLDNMVRVDQDFHSKVAISISSRRGRGSRCVPKAMFERFTEKAIKVIMLAQEEARRLGHNFVGTEQILLGLIGEGTGIAAKVLKSMGINLKDARVEVEKIIGRGSGFVAVEIPFTPRAKRVLELSLEEARQLGHNYIGSEHLLLGLLREGEGVAARVIRMVGEGNEVSVVTGGSTGNTKMPTLEEYGTNLTKLAEEGKLDPVVGRQDQIERVVQILGRRTKNNPCLIGEPGVGKTAIAEGLAQRIATGDVPDTIEGKKVITLDMGLLVAGTKYRGEFEERLKKLMEEIKQSDEIILFIDEVHTLIGAGAAEGAIDAANILKPALARGELQCIGATTLDEYRKHIE…	89.02	0	gi|449440498|ref|XP_004138021.1|	PREDICTED: chaperone protein ClpC, chloroplastic-like [Cucumis sativus]	mll3429
2704	Cotton_D_gene_10029939	33804.1	0.353	7|8|9	39|44|53	1.51	0.001	0.001|0.001|0.001	Cotton_D_gene_10029939	MLSQSFRSLQLPPKVTGPESIAFEFGTSRFYVGVADGRILQYNGPRVGFRDFGFTGPNRSKRMCDGTTDPNLGPICGRPLGLAFHYSLNKLYICDAYFGLMVLGSSGKQATQVSAAADGEPYRLCDALDVHQPSGNVIFVDSSANYDLRNISKAVNANDSTGRLLMYNPDTDRVTVLMKNLSGPAGVAVSQDGTYVLVSNFINNSTIRYWLRGPGANTYDVINLQERPDNIKRTAFGDFWRAAALVKQPTRSLVPIGQRINGFGRVLRTVNFEAWYGNQLISEVQEFGGELYLGSLSAPFVGVFRF	54.49	7e-108	gi|359491389|ref|XP_002274134.2|	PREDICTED: strictosidine synthase 1-like [Vitis vinifera]	mll1724_2
2705	CotAD_03266	32803.8	0.29	5|3|4	9|7|8	1.29	0.019	0.024|0.050|0.004	CotAD_03266	MAAINVSPLFTSSSSLRTFSSYAPQNTPTLSLNSRFAPSLSFPSFSLRPPISTKTRSLIIASAVKNLSEVEPIPVPATPEEFAAKFPSDAGVYAVFDQNDELQFIGISRNIASSLFSHKTSVPELCCSVKVGVVNEADRTALTQAWKSWMEEHIEATGKVPPGNESGNTTWVRQPPKKKADLRLTPGRHVQLTVPLEELIDKLVKQNKVVAFIKGSRSAPMCGFSQRVIAILENQGVDYESVDVLDEEYNCGLRETLKQYSNWPTFPQVFVNGELVGGCDILTSMYEKGELAGLLKN	76.56	6e-151	gi|225439398|ref|XP_002263823.1|	PREDICTED: monothiol glutaredoxin-S16, chloroplastic [Vitis vinifera]	CC2505
2713	CotAD_09448	10157.4	0.177	1|1|2	2|2|5	1.49	0.057	0.124|0.703|0.028	CotAD_09448	MASLPIFSFVPSKTRIYATAAAKGAGGGKEEKGLFDWILGNLQKEEQFYETDPILKKVEEKNGGGSGTTSGRKNSVSIPQKKKGNGGFGLGGLFKK	75	9e-23	gi|255569279|ref|XP_002525607.1|	conserved hypothetical protein [Ricinus communis]	-
2722	Cotton_D_gene_10012093	25213	0.248	3|4|2	8|11|10	1.17	0.005	0.690|0.114|0.011	Cotton_D_gene_10012093	MGSSAITLPTLQGSLFQSHFLGKSPITHRPHKPFFSVAKQPKKAFYAKFDLFEILGGRGLCNGEKGIEVELKRNVDEASSVGNTDVESSDSTAISVPDDAFEKEMMGLTGGFPGGEKGLKKFIEENPPPAKQSVSDSVSIARLGKPKSPELPLLMPGMIAIVKNPNNPFYMYCGIVQRITDGKAGVLFEGGNWDRLITFRLDELERREKGPPMKNPKSVVLEALLEKDPK	63.67	2e-100	gi|462405253|gb|EMJ10717.1|	hypothetical protein PRUPE_ppa010487mg [Prunus persica]	-
2725	CotAD_14740	35366.7	0.32	1|2|2	1|6|7	3.07	0.136	0.001|0.001|0.001	CotAD_14740	MASFHMITTLLFLLTIMLGASNAQLSATFYAKTCPNMSTIVSNVLQQAQGNDIWIFPKIVRLHFHDCFVHGCDASLLLNGTDGEKTATPNLSTEGYEVIDDIKTALEKACPRVVSCADVLALAAQISVSLGGGPTWQVPLGRRDSLTAHREGTGSIPTGHESLANIATLFKSVGFDSTDLVALSGVHTFGRARCAAFMDRLYNFNNKTGKTDPTLNATYANTLKQRCPKGGDTRSLIDLDEQSSLTFDNKYFSNLQNQRGLLQTDQELFSTKGAETVAIVNRFASSQSQFFSSFAKAMIKMGNLNPLTGTNGEIRLDCKKVN	97.83	0	gi|34419961|gb|AAQ67366.1|	POD9 precursor [Gossypium hirsutum]	-
2738	CotAD_58858	49464.2	0.356	8|7|6	59|69|74	1.88	0.003	0.001|0.001|0.001	CotAD_58858	MSLYPSLTMSLLSFSFLLLFAFSAKAVVPPSETFRFVNEGEFGPFIVEYGADYRVISIANAPFQLAFYNTTPNAFTLALRMATTRSDFRWVWEANRGNPVRENATFSLGTDGNLVLADADGRIAWQSNTANKAVVGFQLLPNGNMVLHDSNGKFIWQSFDHPTDTLLVGQSLRAGGATKLVSRASAQNNVNGAYSLVMEPKQLVLQYKGMNSSKPLVYFKSSVWPNTQDGTLQTVTLNVEETNDGFAYDVLLDYTVANSSIGTGNLILTRPKYNSTLSILRLGIDGNLRVFTYYDKVDSQAWEETFTLFSRDSVWGNECELPERCGNFGLCEENQCVACPSPNGLLGWSRNCQQKKVNCRPNDFSYYKLEGVNHFMSQYNEGEGIKESDCGRKCTSDCN…	98.41	0	gi|383932356|gb|AFH57275.1|	epidermis-specific secreted glycoprotein EP1-like protein [Gossypium hirsutum]	-
2753	CotAD_71932	35532.5	0.186	4|3|2	11|5|7	1.34	0.003	0.034|0.135|0.008	CotAD_71932	MNMDLSPKFPATFTETEAGVYYHWAAADSQVLGEAKVAAGKLVLKPRGFALPHYADCSKVGYVLEGKCGVALRIPGINTKENMGFIGVKKGDVLPIPCGSVSSWYNYGDSDVVVIFMADATKAYVAGEITYFLLTGQQGHLRAFSPEFIAKTYQINADKAKNLVGSQKGVLLIKLSEEEARKIPIPNEEVSNILIHNMDASQPDVEVDNGGKLTTIKGTEFPLLEQVGIDVSRLVLESCATRAPSYATEPQVCYIAKGSGEVQIVGINGKLVLNTKVETGQLFVVPKLFAVVVSADEQGIELVSIVTSTRDDKTRLLGGVVVFLDGRV	47.44	3e-102	gi|225447983|ref|XP_002269464.1|	PREDICTED: 11S globulin seed storage protein 2 [Vitis vinifera]	-
2760	Cotton_D_gene_10021090	54968	0.094	4|-|-	14|-|-	1.2	-	0.002|-|-	Cotton_D_gene_10021090	MADTRWGFGLMTFFTFISFYLSLGSCLIAASLEDSIAQQKLDKVHNLPGQSFTVDFAHYAGYVTVNEHSGRALFYWFFEAAKDPDSKPLLLWLNGGPGCSSVAYGEAEEIGPFHIRPDGKTVYLNPYSWNQVANILFLESPVGVGFSYSNTSSDLLNNGDKRTAKDSLTFLLKWLERFPQYKERDFYIAGESYAGHYVPQLSQAIVRYNKATNGKAINLKGYMVGNALTDDYHDHLGQFQFMWSAGLISDETYKLLNVLCDFESFIHFSSACNEMMDVASEEMGNIDPYSIFTPSCSANASQTKWLLKRRHMVSQLSEKYDPCTEKHSEVYFNLPEVQKSLHVLPEAAPSKWETCSDIVNTNWKDSPITMLDVYRELTREGLRICIFSGDTDAVIPITS…	74.73	0	gi|255574994|ref|XP_002528403.1|	serine carboxypeptidase, putative [Ricinus communis]	SPAC1296.03c
2773	CotAD_17012	40612.8	0.307	1|1|1	5|5|5	1.56	0.018	0.001|0.037|0.001	CotAD_17012	MAALRSFLRKRCLTCNELMMTRRLISTEPIIDSSSFAQRLRDLPKDLPGTKIKREVSQLIGRTPLVFLNKVTEGCGAYIAVKQEMMQPTSSIKDRPAFAMINDAEKKNLISPGKTTLIEPTSGNMGISMAFMAAMKGYKMVLTMPSYTSIERRVTMRAFGADLILTDPTKGMGGTVKKAYDLLESTPNAFMLQQFSNPANTQVHFETTGPEIWEDTLGKVDIFVMGIGSGGTVSGVGQYLKSQNPNVQIYGVEPAESNVLNGGKPGPHHITGNGVGFKPDILDMDVMEKVLEVSSEDAVKMARELALKEGLMVGISSGANTVAALRLARMPENKGKLIVTVHPSFGERYLSSVLFQELRNEAENMQPVAVD	87.87	0	gi|37719662|gb|AAP41851.1|	beta-cyanoalanine synthase [Hevea brasiliensis]	cysK
2794	CotAD_49465	31132.2	0.425	1|1|1	16|12|18	1.49	0.016	0.001|0.028|0.001	CotAD_49465	MGDSQYSFSLTTFSPSGKLVQIEHALTAVGSGQTSLGIKAANGVVIATEKKLPSILVDETSVQKIQCLTPNIGVVYSGTGPDFRVLVRKSRKQAEQYHRLYKEPIPVTQLVRETAAVMQEFTQSGGVRPFGVSLLVAGYDDNGPQLYQVDPSGSYFSWKASAMGKNVSNAKTFLEKRYTDDMELDDAVHTAILTLKEGFEGQISGKNIEIGIIGTDRKFRQAPALTLSPFSLKLYGGVMLMRKMTFWLYEVPKVFLVKCNSESGAVLLAISTNILHVAITGAYPS	97.73	5e-158	gi|449455401|ref|XP_004145441.1|	PREDICTED: proteasome subunit alpha type-2-B-like [Cucumis sativus]	MK1228
2797	CotAD_64491	14514.1	0.169	1|2|-	37|19|-	1.78	-	0.001|0.001|-	CotAD_64491	MAGKGGKGLLATKTTAANKDKDKDKKRPVSRSSRAGIQFPVGRIHRQLKSRASAHGRVGATAAVYLASILEYLTAEVLELAGNASKDLKVKRITPRHLQLAIRGDEELDTLIKGTIAGGGVIPHIHKSLINKTTKD	95.45	1e-70	gi|470108692|ref|XP_004290644.1|	PREDICTED: histone H2A variant 1-like [Fragaria vesca subsp. vesca]	SPAC19G12.06c
2802	Cotton_D_gene_10006150	11362.8	0.295	1|1|1	6|8|11	1.22	0.059	0.025|0.352|0.405	Cotton_D_gene_10006150	MNTDITASAKPEYPVIDRNPPFTKVVGNFNTLDYLRFTTITGVSVTVGYLSGIKPGLKGPSMVTGGLIGLMGGFMYAYQNSAGRLMGFFPNDGEVARYRKRGLKN	90.48	3e-65	gi|224089721|ref|XP_002308803.1|	predicted protein [Populus trichocarpa]	-
2805	CotAD_52528	24709.3	0.524	4|7|4	26|21|30	5.27	0.041	0.001|0.001|0.001	CotAD_52528	MKTTTASVFLLFIIFSITPSSFSFGVANTTNAPVLDSDGNELRTGTPYFVVSSIWGAGGGGLDPGRPRGKPCPEVVAQRGSGDNGIPVIFSNSDSKDGVVRLSSDINIAFVPLRPKFCETTTVWKVADYDHSAGKWWVITDGVKGNPGANTLTSWFRIEKTTTDFDYTFKYCPAVCGTCPALCNQIVRDFDGEMVRLALTTGHGWPFIFKKVGKSAMEIEQVVHN	57.96	1e-76	gi|55139090|gb|AAV41233.1|	putative 21 kDa trypsin inhibitor [Theobroma bicolor]	-
2826	CotAD_25899	17639.8	0.403	1|1|1	6|5|3	1.37	0.012	0.001|0.005|0.001	CotAD_25899	MSDEEHHFESKADAGASKTFPQQAGTIRKNGYIVIKNRPCKVVEVSTSKTGKHGHAKCHFVGIDIFTGKKLEDIVPSSHNCDVPHVNRTDYQLIDISEDGFVSLLTESGDTKDDLRLPTDDNLLKQIKEGFAEGKDLVVSVMSAMGEEQICALKDIGPK	97.48	4e-113	gi|449455523|ref|XP_004145502.1|	PREDICTED: eukaryotic translation initiation factor 5A-like [Cucumis sativus]	MA3987
2830	Cotton_D_gene_10021228	44319.6	0.295	7|7|7	18|19|28	1.2	0.001	0.001|0.015|0.001	Cotton_D_gene_10021228	MLLVTSASVALSNTRSWALSEENLLFLEAWRTIDRAYIDKTFNGQSWFRYREDALRNEPMNNREETYMAIRKMLATLNDPFTRFLEPEKFKSLRSGTQGALTGVGLSIGYPTESEGSRTGLVVISATPGGPANQAGISSGDIILEIDNASTESVGIYEAAERLQGPEGSSVELTVQTGPEIKHLTLTRAKISLNPVKSRLCEVPGSEKNYPKIGYIKLTSFNQKASAAVKEAIDTLRSNNVNAFVLDLRDNSGGLFPEGIETAKIWLDKGVIVYICDNRGVRDIYDTDGSSAIAASEPLAVLVNKGTASASEILAGALKDNKRAVLFGEPTYGKGKIQSVFQLSDGSGLAVTVARYETPGHNDINKVGVIPDHPLPNSFPKDDDGFCGCLQDPASACYV…	83.29	0	gi|255554320|ref|XP_002518200.1|	Carboxyl-terminal-processing protease precursor, putative [Ricinus communis]	CAC0499
2836	Cotton_D_gene_10030731	53453.6	0.105	1|1|1	3|2|1	1.37	0.028	0.048|0.172|0.205	Cotton_D_gene_10030731	MLKAMLKFTTPTPTPLAIVTPFHASHIQATVYCCRKHGLQVRTRSGGHDFEGLSYTTAYKVPFVVIDLVNLRSVQVNVEKATAWVESGATVGELYYEIARKTRTLAFPAGIGHTVGIGGQLSGGGLGPLFRKYGLASDNVIDARLIDAYARILDKKSMGKDLFWAIRGGGGGSFGIVLAWKLKLVLVPANVTACTVSKTLEQNATKLVHQWQSIARKFPKEIQSSIAIARVNSSEDGKMTIQASYGSVFLGSIDELIPLMEEKFPELGLVKEDCLEMSWAESILYGALSIIGLPLETLLNRTQKSALSQTFFKAKSDFVKQPISESGFEGLWPKFYEDEAKSAVMVLVAYGGKMDEIPETEYPYPHRAGYLYSILYVVNWEEEENKNSEKFLNWMRRVY…	57.2	0	gi|356512137|ref|XP_003524777.1|	PREDICTED: reticuline oxidase-like protein-like [Glycine max]	PA0317
2847	CotAD_26989	63774.2	0.26	1|1|1	18|7|12	1.31	0.012	0.003|0.002|0.001	CotAD_26989	MSRIKETLSNISDSAKHISFTKKHKKIFLALFASLVIVAAIIGIVAGVSSRNNSDESDTSHHAIVKSACSGTFYPDLCFSAVTTVPAGTAKKVRSQKDVIELSLNITTTAVEHNYFKIKKLLARKDLTTREKTALHDCLETIDETLDELHEAVEDLHEYPNKKSLTQHADDLKTLMSAAMTNQETCLDGFSHEGADKKIREVLIDGEKYVEKMCSNALAMIKNMTDTDIANEMMLKSSNRKLKEDESGIAWPEWLSAGDRRLLQSSSVTPNVVVAADGSGNFKTVSEAVAKAPEKSSKRYIIRIKAGVYIENVEVPKKKSNIMFIGDGRTKTXXNVVDGSTTFHSATVAAVGEKFLARDITFQNTAGPSKHQAVALRVGSDLSAFYNCDMLAYQDTLYV…	98.45	0	gi|377824753|gb|AFB77929.1|	pectin methylesterase [Gossypium hirsutum]	RSp0138
2864	CotAD_18164	24062.1	0.385	-|3|-	-|12|-	1.21	-	-|0.001|-	CotAD_18164	MLAVFEKSIAKSPDALKVSGDSEAASALNKGFLATHFATLHPGSVTVNLGSSGFMAYSLDKQNPLLPRLFAVVDDIFCLFQGHIENVAVLKQQYGLNKTANEGIIVIEAYRTLRDRGPYPPDQVVRDIQGKFAFIIYDSSSKATFIAADADGSVPFFWGCFFTSSGGLRSYEHPLNELKPVPRVDSSGHVCGATFNVDVETKKESTGMKKVGSAADWSANY	72.11	3e-127	gi|255552037|ref|XP_002517063.1|	Stem-specific protein TSJT1, putative [Ricinus communis]	-
2872	CotAD_72137	19555.1	0.238	1|1|1	1|1|1	1.94	0.04	0.363|0.252|0.006	CotAD_72137	MNNTVSFALLHFAFCFTLVSFTPISALELHGTGANMVETTCQKTPFYNLCISALKSDPRSSGANVAGLAQIGTDKLKAKATATLRQITALLKVAKDPKLKMALRDCADYYNAIVKYDIPVAVEAVTKGDPKFGVEGATDAANEADACGRGFKNQPKFPIYASNKVVHDLSAVVASIVQLLL	47.95	5e-48	gi|225432016|ref|XP_002279756.1|	PREDICTED: uncharacterized protein LOC100261956 [Vitis vinifera]	-
2878	Cotton_D_gene_10039295	51544.6	0.05	-|2|3	-|4|8	1.28	-	-|0.243|0.001	Cotton_D_gene_10039295	MDVKKSKATVALMMMFMMLFLVNFPGCFSAASQQPNNKKSTHLKPHNGFHSSFLFPVTGNVYPLGYYSISLSIGNPPKVFEFDIDTGSDLTWVQCDAPCTGCTKPIDHLYKPQKHILVSCEHPSCGVVHFPESPHCEKPDDQCDFEIDYVDHGSVLGVVVADVFSLRFMNGSLIHLPLTFGCAYDLKNPGPYDPPAAGVLGLSNGKASILSQLRSFDLTRNVLGHCLSGKGGGFLFLGDDLVPSGMSWMPVSANSKHYLSSPAEVFFDGKPTGIKDLKVVFDSGSSYTYFGFQVYEGVLTLVRKGLTKKPLDTVQDKALPICWKGTKPFKSVHDVKNYFSTLTLKFKDTQNIQLELQPEAYLIVTEDGNACFGILNGTEAGLGDLNVIGDISLIGKMVV…	60.52	1e-171	gi|470109200|ref|XP_004290889.1|	PREDICTED: aspartic proteinase Asp1-like [Fragaria vesca subsp. vesca]	-
2885	CotAD_14901	37710.7	0.333	-|1|1	-|1|1	2.09	-	-|0.117|0.001	CotAD_14901	MAIQIPRVKLGTQGFEVSKLGFGCMGLSGHNNSVSDEAGIAIIKHAFERGITHFDTADMYGPKTNEILVGKALKHLPREKVQLATKFGVESMGPGGPVINGTPEFVRSSLEASLQRLDVDYIDLYYIIRVDHKTPIEDTMEELKKLVEEGKIKDIGVSEASPETIRRAHAVHPLTAVQLEWSLWTRDVEEEIIPLCRKLGIGIVPYSPLGRGFFAGRANKDTSNTPLRMFPRFSGENLEKNRILYSKVEKLAEKHGCTAAQLALAWVLHQGDDVAPIPGTTKIENLDSNIESVKVKLTKEDLKEIIDTIPIHEVAGSNYPDSLKQFTWKYGNTPPKKST	70.12	2e-174	gi|225451316|ref|XP_002278850.1|	PREDICTED: auxin-induced protein PCNT115 isoform 1 [Vitis vinifera]	PA1739
2893	Cotton_D_gene_10006643	22691.2	0.048	1|-|1	2|-|5	1.76	-	0.063|-|0.020	Cotton_D_gene_10006643	MGLQLWETLKEEITAYTGLSPATFFTVVALLWAIYYVVTGLFGSSDDHHQRSRAFEEQMEPLPPPVHVGEISEKELKQYDGSDPKKPLLMAIKGQIYDVSQSRMFYGPGGPYALFAGKDASRALAKMSFEEQDLTGDISGLGPFELDALQDWEYKFMSKYVKVGTIKKTVAVTGGDNGNGEALGTTEGHAKPAEDGSSQNAVAGTDAEE	75.85	2e-112	gi|255539487|ref|XP_002510808.1|	steroid binding protein, putative [Ricinus communis]	-
2896	Cotton_D_gene_10021888	40156.7	0.14	3|4|-	21|32|-	1.63	-	0.001|0.001|-	Cotton_D_gene_10021888	MDTQSFLFSVFCFLFYFLSGEPQVVEGTRLSWTSSPFGFKPKMLFAFGDSYADTGNTKIAVTRSWHFPYGITFPGKPSGRFSDGFVSTDFVAGFLGMKTPIPYRWRKELSGRVKYGLNFAYGGTGVFDTLVAEPNMTTQIDFLQQLINDSVYTKRVLRTSVALVSLAGNDYSYYLETNGSAAAFPGFIQSVVNQLMVNMKRIHDLGVRKIGVMSLISLGCTPQNTAGSSFQRCNETENDLVMLHNNLLLQAVDTLNQQTNSTLFFIIDLHNAFLTVFNGTETHQGSPTFENPFEPCCFGVTEGFFCGSVDENGGKKYTLCSNPKTKLFWDGNHPTSEGWRAIYSTPAFQNTLKQFID	58.62	9e-141	gi|255575625|ref|XP_002528712.1|	carboxylic ester hydrolase, putative [Ricinus communis]	-
2904	CotAD_25851	41575.8	0.265	1|1|1	3|5|5	1.13	0.007	0.001|0.001|0.586	CotAD_25851	MAEPSTISPAPLLKDELDIVIPTIRNLDFLEMWRPFFQPYHLIIVQDGDPSKTIKVPEGFDYELYNRNDINRILGPKSSCISFKDSACRCFGYMVSKKKYIYTIDDDCFVAKDPSGKDINALEQHIKNLLCPSTPFFFNTLYDPYRAGADFVRGYPFSLREGVPTAVSHGLWLNIPDYDAPTQLVKPLERNTRYVDAIMTIPKGTLFPMCGMNLAFNRELIGPAMYFGLMGDGQPIGRYDDMWAGWCTKVICDHLGLGVKTGLPYIWHSKASNPFVNLKKEYKGIYWQEELIPFFQSVTLPKDCTSVQKCYIEISKQVKAKLGKVDDYFNKLADAMVTWIEAWDELNPSGAKSAELSNGASK	95.53	0	gi|110559491|gb|ABG76000.1|	GRP-like protein 2 [Gossypium hirsutum]	-
2912	CotAD_51172	33998.2	0.256	7|6|5	21|19|20	1.95	0.005	0.001|0.001|0.001	CotAD_51172	MKANDLPPAAEVIDLFKQKGIKRMRLYDPNPDALQALGGTNIELLLDLPSANLESVAASQANADQWVEDNIKKYNTVNFRYIAVGNEVKPTDSFAQSLFPAMQNIRTAIVNAGLGDQIKVSTATFFAAIDKSSFPPSKGSLDPEYQKLLGQVITFLRDNQAPLLVNTYPYFSHIGDPEHVPLDYALFTAPSAVVQDGSLQYQYLFDAMLDTFYSALEKAGGVSVDIVVSETGWPSDGGQATSVDNAMTYNTKLVQHVNQGKGTPKKPEKAIVAYLFAMFDENEKEPAYEKHWGLFFPKKQEKYSISFN	100	0	gi|1770305|emb|CAA92278.1|	1,3-beta-glucanase [Gossypium hirsutum]	-
2922	CotAD_72726	27011.9	0.069	1|1|-	2|6|-	1.22	-	0.752|0.019|-	CotAD_72726	MAFAKVFLLGFLAMVSGVQGYSGDWTNAHATFYGGSDASGTMGGACGYGNLYSQGYGTNTAALSTALFNNGLSCGSCYEIKCMDDGKWCLPGSFVVTATNFCPPNNALPNNAGGWCNPPLQHFDLSQPVFQHIAQYRAGIVPVAYRRVPCRRKGGIRFTINGHSYFNLVLITNVGGAGDVHAVAIKGSRTGWQPMSRNWGQNWQSNTYLNGQSLSFKVTTSDGRTVVSSNVAPAGWSFGQTFTGRQFR	99.6	1e-173	gi|21314553|gb|AAM47002.1|AF512544_1	alpha-expansin precursor [Gossypium hirsutum]	-
2939	CotAD_63549	83842.3	0.112	6|2|6	10|3|11	1.37	0.032	0.001|0.033|0.016	CotAD_63549	MPGVMPILPLPAPPSDGDLGPLPPSQVPEAQNEEIQTNEEQNKANSVATHTRTIGIIHPPPDIRNIVDKTAQFVAKNGPEFEKRIIANNANNVKFNFLTSSDPYHAYYQHRLSEFRAQNQNQPNSQQQQPQLQSADSAPAETATAAAADGNDAVVAVAKPDPASLFRLPVRKNLEPPEAAQYTVRLPEGITGEELDIIKLTAQFVARNGKSFLTGLTSREINNPQFNFLRPTHSMFTFFTELADAYSKVLMPPKGLTEKLRKSVVDMTTVLERCLHRLEWERSQEQARQKAEDEIEQERMQMAMIDWHDFVVVETIDFADDEDEDLPPPMTIEEVIRRSKITAMEEDEIVEPGKEVEMEMDEEEVQLVEEGMRAASIGENDGEKKDIRVNEDPEPPMRI…	75.86	0	gi|225423737|ref|XP_002278479.1|	PREDICTED: probable splicing factor 3A subunit 1-like [Vitis vinifera]	-
2948	CotAD_25015	55503.1	0.167	1|1|1	2|3|6	1.75	0.033	0.119|0.002|0.001	CotAD_25015	MANNFLYFCLFCSLVVLTHSAPEEALVTQLPGFSGTFPSNHYSGYVNVDQNHGKNMFYYFVESERNPSEDPLVLWLNGGPGCSSFDGFVYEHGPFNFEAAKANESLPQLHLNPYSWSKVSNIIYLDSPVGVGFSYSKNKSDYETGDVQTAIDTHAFLLKWFELYSEFLPNPFFIAGESYAGVYVPTLSSEVVKGIVAQKKPIPNFKGYLVGNGVADDEFDGNALVPFAHGMGLISDELYEEVNSECKGNFYIPLSETCESKLEKVEKNIKDLNIYDILEPCYHAPETLENTDIKIRLPSSFQKLGETNRPLAVRTRMFGRAWPLRAPVRDGIVPTWPQLLDAESVPCTDDTVATQWLNNPAVRKAIHAEEETAIGKWELCTDKILYDHDAGSMIMYHKN…	78.1	0	gi|224132038|ref|XP_002321240.1|	predicted protein [Populus trichocarpa]	CC3418
2949	Cotton_D_gene_10012918	46669.6	0.339	12|11|13	128|128|140	5.34	0.023	0.001|0.001|0.001	Cotton_D_gene_10012918	MASLQYLLFISFLVFFVAPGLAQQSFRPKALVVPVSKDASTLQYLTTINQRTPFVPIRVVVDLGGRYLWVDCERDYVSSTYRPARCSSAQCSLAGANGCGDCFDGPRPGCNNNTCAVGPGNTVTNTAGPGEVAQDVVSLQSTDGRNPGRVVTVPRFLFACAPTSLLQGLANGVVGMAGFGRYRIGLPSQFSAAFSFRRKFAICLSSANGVIFFGDGPYVFLPGVDASESLTFTPLFINPISTAPSFPLGEPSAEYFIGVKSIKVNEKPVSLNTTLLSINSEGVGGTKISTVNPYTALEASIFKAVTEAFINEAAARNITRVAGVAPFEVCFSSRNIVGTRLGAAVPSIDLVLQNENTFWRIFGANSMVEVSREVSCLGFVNGGSNPMTSIVIGGYQLED…	75.18	0	gi|356500210|ref|XP_003518926.1|	PREDICTED: basic 7S globulin-like [Glycine max]	-
2970	CotAD_22892	40201.5	0.223	6|3|5	31|20|28	1.5	0.007	0.001|0.001|0.001	CotAD_22892	MAAKLLSFLFFSFHFLVFQLHFSAGQDVVRAAYWSAGSEFPVSDIDSTLFTHLFCAFADLDSQTNQVTVSSANQARFSTFTETVQLKNPSIKTLLSIGGGSSSASDFASMASQANTRKSFIDSSINIARSYGFHGLDLDWEYPSTPTEMNNLALLLNEWRVALVNEAANTGNSRLLLSAAFFRNSDYYTLAYPIQAIQNSLDWINVMAYDFYGPGWSTVTGPPAALYNPGTQVSGDYGITSWIQSGIPSNKLVLGFPFYGYAWQLVDANNHGFFAPTSGPAITPNGDLGYGQIKDFISANSATEVYNATVVSNYCYAGTTWIGFDDTESITAKVSYSKQKGLLGYFAWHVGADDGWTLSRAASETWGS	73.04	0	gi|374719233|gb|AEZ67302.1|	chitinase 3 [Populus x canadensis]	BS_yaaH
2986	CotAD_14882	44742.1	0.299	4|5|5	60|47|55	1.99	0.019	0.001|0.001|0.001	CotAD_14882	MNALVATNRNFKLAARLLGLDSKLEKSLLIPFREIKVECTIPKDDGTLATFVGFRIQHDNARGPMKGGIRYHPEVDPDEVNALAQLMTWKTAVANIPYGGAKGGIGCNPGELSKSELERLTRVFTQKIHDLIGIHTDVPAPDMGTGPQTMAWILDEYSKFHGHSPAVVTGKPIDLGGSLGRDAATGRGVLFATEALLNEHGKSISGQKFVIQGFGNVGSWAAQLIHEKGGKVVALSDITGAIKNSNGIDIPSLLKHVKENKGIKGFHGGDSIDPKSVLVEDCDILIPAALGGVINRENANEIKAKFIIEAANHPTDPEADEILSKKGVIILPDIYANSGGVTVSYFEWVQNIQGFMWDEEKVNSELKTYMTKGFKDVKEMCQTHNCDLRMGAFTLGVNR…	95.38	0	gi|255568914|ref|XP_002525427.1|	glutamate dehydrogenase, putative [Ricinus communis]	slr0710
3012	CotAD_20389	25219.7	0.384	4|6|5	42|59|63	3.56	0.257	0.001|0.001|0.001	CotAD_20389	MNPFKTLPTLSFLFLTLFSLAHAATFDIRNNCPYTVWAAASPGGGKRLDQGQAWQITAASGTTQARIWARTKCNFDASGKGSCETGDCGGVLECKGYGKAPNTLAEYAIDQFEHQDFIDISNIDGFNVPMEFSSNSPGCTRVIKCTADIVGQCPNQLKVPGGCNGPCPVFKTEEHCCNSGNCQPTDFSRFFKERCPDAYSYPKDDPTSLFTCPTGTNYKVIFCP	83.76	4e-125	gi|255537367|ref|XP_002509750.1|	Osmotin precursor, putative [Ricinus communis]	-
3013	CotAD_42800	20189.2	0.077	2|1|1	7|4|2	1.97	0.013	0.001|0.001|0.070	CotAD_42800	MVLSLADAPFDNQRNIEYIKSSCSSTTYPRLCYRSLSIYANKIDTSPRLLVDTALNVTLKASKSTSRLMVKISRIHGLRPRVAAAMADCIEVIGDSVDELQQSIEELGHVSRSNFALTMSDIQTWVSTALTDEDTCMDGFAGKSMNGNVKTMVRKRIVKIAHLTSNALALVNNYASTQSNLP	60.34	9e-74	gi|225466067|ref|XP_002264101.1|	PREDICTED: 21 kDa protein-like [Vitis vinifera]	-
3015	Cotton_D_gene_10000646	53284.5	0.156	5|5|-	11|9|-	1.42	-	0.001|0.001|-	Cotton_D_gene_10000646	MAATTSLSLLPSSLGFPNERPSSTSQSSSYSCSCSVFFNAGTRLRSHDSFACVTFPSSSSTCSWRFNNRAGTHRFGTTVVAASGDYYATLGVPKSASGKEIKAAYRRLARQYHPDVNKEPGATEKFKEISAAYEVLSDDKKRALYDQYGEAGVKSAVGGQSSAYTTNPFDLFETFFGPSMGGFPGMDQTGFGTSRRSTVSKGDDIRYDITLEFSEAIFGAEKEFELSHLETCEVCLGTGAKVGSKMRICSTCGGRGQVMRTEQTPFGLFSQVSVCPNCGGDGEVISENCRKCSGKGRERVKKNIKVKVPPGVSAGSILRVAGEGDAGPKGGPPGDLYAYLDVQEVPGIQRDGINLLSTVSISYLDAILGSVVKVKTVEGVTDLQIPPGTQPGDVLVLAR…	82.17	0	gi|224134931|ref|XP_002327525.1|	predicted protein [Populus trichocarpa]	BU152
3016	CotAD_56317	22371.7	0.256	4|2|4	16|14|20	1.18	0.004	0.020|0.044|0.002	CotAD_56317	MDRSRLRSLTLLCTLVLLGSLASTQAKKSKEDLKEVTHKVYFDVEIAGKPAGRIVMGLFGKAVPKTAENFRALCTGEKGVGKRGKPLHFKGSAFHRIIPNFMIQGGDFTLGDGRGGESIYGEKFADENFKLKHTGPGLLSMANAGPDTNGSQFFITTVTTSWLDGRHVVFGKVLSGMDVVYKVEAEGRQSGTPKSKVVIADSGELPL	94.54	4e-115	gi|255569359|ref|XP_002525647.1|	cyclophilin, putative [Ricinus communis]	DR0237
3021	CotAD_31187	63091.6	0.073	1|2|1	1|21|2	1.36	0.002	0.066|0.002|0.004	CotAD_31187	MVSWFVGVLFLSTLLLCSADVHHYEFFVRESNFTKLCNTTTLLVVNDSYPGPEIRVHKGDTVFVNVHNQGNYSFTIHWHGVKQPRNPWFDGPEFITQCPIQPGTNFTHEIILSDEIGTLWWHAHSDWTRGSVHGAFIILPAENDTYPFPTPNADQTIILQSWYNGDYKQIIDDALAAGVAPRTADAYAINGHLGDTYGCPNDTIFLMEVESENIYLLRIINAAMNEEQFFTITNHTLIVVAQDASYVRMFTTDYIMISPGQTMDVLVIADQNVGQYYMAIRPFSDSAAQPSDFITTGVFQYTNNEGGLNASLIPLPAMNDTDAMLNFINQIRYTNVSQNPTINVPADTDINRRLYITIATNTLPCNTSECVSDDRFAASLNNVSFVSPRIDILQAYYRN…	81.14	0	gi|40218371|gb|AAR83118.1|	secretory laccase [Gossypium arboreum]	YPO3409
3023	CotAD_41440	20951.5	0.062	-|1|1	-|10|9	1.39	-	-|0.002|0.001	CotAD_41440	MASTVKPIFILLVFISFHFSLLASKPNDPTPSTWPLQFHSVLFMNNSGTLQKVDLWYDWPNGRNFNIIQNQLGKLLYDLEWDNGTSFIYTLDSNKECRVLHFDVGILRPNWLDGANYLGQQQKDGFLCNVWEKVDFIWYYEDAVTKRPVFWAFYTGISSHFSLTCFCPSIVILKARVH	79.61	1e-87	gi|470131752|ref|XP_004301755.1|	PREDICTED: uncharacterized protein At4g14100-like [Fragaria vesca subsp. vesca]	-
3032	CotAD_64397	27457.2	0.111	-|1|3	-|1|5	1.53	-	-|0.796|0.039	CotAD_64397	MASTTSTNLPLKDRVAIVTGSSRGIGRVIATHLAGLGAKLVINYTSSADQADLVATQINSLYPGDSPRAVTVKADVSDPAQVKLLFDSAEQAFGSPIHILVNSAGVLDPKYPKIADTALEDFDRIFSVNTRGAFLCAKEAANRLKRGSGGRIILLSSSMAAALRPGFGAYAASKAAVEAMVKILAKELKGTGITANCVAPGPIATEMFFAGKSEEAVQRCIDESPHNRLGQSEDVAPVVGFLASDASEWVNGQTIRVNGGYV	76.28	3e-130	gi|356560963|ref|XP_003548755.1|	PREDICTED: short-chain type dehydrogenase/reductase-like [Glycine max]	NMA0533
3037	Cotton_D_gene_10027624	55285.2	0.238	5|1|4	13|1|13	1.33	0	0.001|0.102|0.001	Cotton_D_gene_10027624	MAKPQLLFLFSFSLLCLISFSAAASSITADLRLTDSSFPSVHAKKLIRELNLFPKGEVNVVDEHRVSLPEGPKLVEKRFKFPTLEVPGGVSFEDLGHHAGYYKLPNSHDARMFYFFFESRNSKKDPVVIWLTGGPGCSSELALFYENGPFTIADNMSLVWNEYGWDKASNLLYVDQPIGTGFSYSSDQRDIRHNEDEVSNDLYDFLQAFFAEHPEFAKNDFFITGESYAGHYIPAFAARGFAIGNGLTDPAIQYKAYTDYALDMGVIKKSDHDRINKLVPICEMAIKLCGTDGTISCMASYFVCNNIFNGIMALAGDTNYYDVRKKCEGSLCYDFSNMESFLNKKSVRDALGVGNIDFVSCSPTVYQAMLVDWMRNLEVGIPVLLEDGIKLLVYAGEYD…	96.45	0	gi|18447763|gb|AAL67992.1|	putative serine carboxypeptidase precursor [Gossypium hirsutum]	SPAC1296.03c
3040	CotAD_64598	80980.1	0.168	6|6|8	18|18|17	1.76	0.076	0.001|0.001|0.001	CotAD_64598	MAAISTASADEQTYIVRMDKTKIPNTYSSLVSSTKPWHQAVLDSLIDVSSTEATPPELLYSYETALFGFAARLSSKQLESLKNMDGFMSAVPNKMLSLHTTRSPLFLGLTGMKGEKGPWSGSNLHSDVIIGVVDSGIWPEHVSFQDHGLSPVPERWKGVCENGTRFSPSNCNKKLIGARYFYGGYIAAGGKINDTEEYKSARDVSGHGTHTASTAGGDIVENANIFGLANGTATGMRYTARIAAYKVCWPGCTSVDILTAMVKAIEDGVDVLTLSLGSESEAVPYWQDYLVIASYLAFKSGIFVAFSAGNSGPDAYTVVNTAPWIMTVAASTMDRSFVAIIELGNGETFEGSSFYTGKALKGLPIVYGKTAGDLGAEYCLPGSIDPKLVKGKIVICEQG…	60.24	0	gi|224127486|ref|XP_002320086.1|	predicted protein [Populus trichocarpa]	BS_bpr_1
3052	Cotton_D_gene_10038143	24205.2	0.312	1|4|1	3|12|5	1.42	0.016	0.059|0.001|0.039	Cotton_D_gene_10038143	MAAIKVHGSPMSTATQRVLACLHEKGTDFQFVPINMAAGEHKSENYLSLNPFGQVPAFEDGDLKLFESRAITHYIAHEYSDKGTQLLIPGSNKDMAVLELWKEVEAHQFDSPSSKIAWEAFYKPFFGMVTDSAAVEENEGKIAKVLDVYEARLTQSKYLASDYFTLADLHHIPNIQCLLATPAKKLIDSRPHVCAWVKEITARPAWSKVLAMQKQ	70.7	8e-113	gi|255582148|ref|XP_002531868.1|	glutathione-s-transferase theta, gst, putative [Ricinus communis]	RSc0384
3059	CotAD_29512	25682.9	0.187	2|-|-	5|-|-	1.54	-	0.026|-|-	CotAD_29512	MSSALEMSLDDLIKRNRKSGSGNPRGRGRGSGPGPARRFPNRGANRSAPYTSATAPETTWQHDMYSDKGAAFQGQAGRAAAIETGTKLYVSNLDYGVSNDDIKELFSEVGDLKRYAIHYDWTGRSKGTAEVVFSRKADAMAAVKRYNNVQLDGKPMKIEIVGTNIATPAAPTVANVAFGSSNGAPRGGRGRGGGFRRQRGVAGGRGFGRGRGQGRGRGEKVSAEDLDADLEKYHTEAMQTN	71.19	9e-80	gi|225435024|ref|XP_002284215.1|	PREDICTED: RNA and export factor-binding protein 2 [Vitis vinifera]	YCL011c
3087	CotAD_73953	53119	0.309	1|1|1	1|3|4	1.65	0.097	0.001|0.002|0.061	CotAD_73953	MHCFEYFRCGHCKNLAPEYEKAASILSKHDPPVILAKVDANEEANKYLANEYEVRGYPTLRILRNGGKNVQEYKGPREADGIVEYLKKQSGPASAELKSAEDASNLIDGKKIVVVGVFPKFSGEEFENYMALAEKLRSDYEFSHTLDAKHLPRGESSVTGPVVRLFKPFDELFVDFEDFNVEALEKFVAESSMPLVTLFNKDPSNHPFVIKFYNSPNAKAMLFANLSVEGIDSLTSKYREVAEQYKGQGIGFLLGDLEASQAAFQYFGVQESQVPLIIIQNNDGKKYLKPNLLANDIAPFVKDYKEGKVPPYLKSEPIPEENKEPVKVVVADTFEDMVFKSGKNVLLEFYAPWCGHCKKLAPILDEVAVHYEKDDNVLIAKLGPAAPISSVDIVYVKFM…	80.74	0	gi|133902301|gb|ABO41832.1|	putative protein disulfide isomerase [Gossypium raimondii]	SPAC13F5.05
3091	CotAD_21769	37717.1	0.083	2|2|2	4|7|3	1.32	0.009	0.022|0.002|0.133	CotAD_21769	MHWVLSVLLAVIGVTALLVVTPVSGYRPWPYVKPNSSDLMFGGSKKFEGSSEFVHMRYHMGPVLTAHITIHPIWYGRWQKSQKKIIREFINSISAVDSKHPSVAGWWKTVQLYTDQTGANISRTVLLGEEKNDRFYSHGKSFTRLSIQSVIKSAVTARTKPLPINPKSGLYLLLTSDDVYVEDFCGQVCGFHYFTFPSIVGYTLPYAWVGNSAKLCPGVCAYPFAVPQYMPGLKPLKSPNGDVGVDGMISVIGHEVAELATNPLVNAWYAGQDPVAPVEIADLCEGIYGTGGGGSYTGQLLNDKDGATYNMNGIRRRYLVQWVWNHIVSYCTGPNALDQ	82.88	0	gi|462414702|gb|EMJ19439.1|	hypothetical protein PRUPE_ppa008023mg [Prunus persica]	-
3113	CotAD_11895	29183	0.307	4|3|4	17|15|25	2.18	0.163	0.001|0.001|0.001	CotAD_11895	MSFGSSVTKRLDGKVALITGGASGLGECTVRLFVKHGAKVLIADIQDELGNSLCQELGTDNISYVHCDVTCESDVENAVNLVVSKYGKLDIMFNNAGITGDNEVRVTDAGAEDFKRVFDVNVLGGFLGAKYAARAMVPAKKGCILFTSSIVSKISVGLPHAYKASKHAVAGLTKSLSVELGEHGIRVNCISPNAILTPLFQKSIGNIDKKKGEEMLAVSAVLKGPVLEAEDFANAALYLASDDAKFISGVNLPVDGGYSLSNQSWKMGFAALLE	84.7	4e-166	gi|89258498|gb|ABD65462.1|	short chain alcohol dehydrogenase [Gossypium hirsutum]	BS_ycdF
3116	CotAD_08082	56101.9	0.247	1|1|1	4|6|6	1.3	0.019	0.001|0.148|0.048	CotAD_08082	MAKLKYLSLIFFSHLFQVSSCTAVFPVLDELRLAGSSFPSVQAKKLIRELNLFPKEEVNLVDQGRVSLPQDSKLVEKRFKFPGLEALGGVSVDDLGHHAGYYKLPNSYDARMFYFFFESRSNKEDPVVIWLTGGPGCSSELALFYENGPFSIADNMSLVWNEFGWDKASNLLYVDQPIGTGFSYSSDRRDIRHNEDEVSNDLYDFLQAFFAEHPELAKNDFYITGESYAGHYIPAFAARVHRGNKAKDGIHINLKGFAIGNGLTDPAIQYKAYPDYALDMGLIKKTDYSLINKLVPVCEFAIKLCGTDGTISCMASYFVCNTIFASIIARAGGINYYDIRKKCEGSLCYDFSNMETFLNKKSVRDALGVGNIEFVSCSPTVYQAMLVDWMRNLEVGIPV…	85.83	0	gi|21901929|emb|CAC86383.1|	carboxypeptidase type III [Theobroma cacao]	SPAC1296.03c
3118	CotAD_00911	59708.4	0.139	-|1|2	-|2|2	2.58	-	-|0.024|0.010	CotAD_00911	MKISSSIIPFISIFILLSISSVTPSDSDDFDDFLRCLPKQSDSSIPIANAILTPNSSSFQYIYQVRASNLRPLLSATSRPVAIITALHPSHAQASVICAKRHDFQLRIRSGGHDFEGLSYTSDVPFVILDMFNLNSIDIDMSTETAWVQAGATTGELYYRIAEKSNVHGFPSGVCTTLGIGGHFSGGGYGFLMRKYGVSIDNVIDAQLIDANGRILNRKSMGKDVFWAIRGGGTTSFGIILSWRIKLVRVPPRVTVFTVQRTLEQGATELAYRWQQVAPKLPKDLFIRLQPEPINNGGNNKTVRVSFIGHFLGQADGLLRLMNVSFPELGLTRNDCLEMSWVESTLYWAGFSNGTSIDVLLNRVAVNKVFAKDKSDYYKAVIPKQGLETLWQVLMDIEN…	61.86	0	gi|255578041|ref|XP_002529891.1|	Reticuline oxidase precursor, putative [Ricinus communis]	YPO0308_1
3121	CotAD_26719	34127.6	0.264	1|4|4	1|7|10	1.37	0.001	0.645|0.005|0.005	CotAD_26719	MEMLASLHTLPSPLPPTTTSSSSEPSYKTPFITRRRAIISASTAAIASLLHFSNPIPSLYPAIALQPQQVELDQEEDRIVRLFQETSPSVVFIEDLELAKIPKSSSKGDRDVVAEDEDAKVEGTGSGFIWDKFGHIVTNYHVVDKLATDQSGLQSCKVLLADASGTSFYKEGKIIGIDPSYDLAVLKVDVEGYELKPIVVGTSRDLRVGQSCFAIGNPFGYENTLTTGVVSGLGREIPSPNGRAIRGAIQTDAAINAGNSGGPLIDSYGHVIGVNTATFTRKGTGISSGVNFAIPIDTVVRTVPYLIVYGTPYSNRFQ	82.17	1e-150	gi|255557249|ref|XP_002519655.1|	Protease degS precursor, putative [Ricinus communis]	AGc3700
3125	CotAD_05706	65268.5	0.039	1|1|2	2|3|3	2.52	2.075	0.452|0.001|0.284	CotAD_05706	MATIYPSITSSFLPKKSKFSIIKNPKFKNPKSIPCKAINGEQEHPKHKFDRRDVLIGLGGLYYGAASLNDAMAAPISAPEMEKCGRADVPEGVQTTDCCPPVSKRILDFKPPFSNSPVRVRPAAHLVDDEYIRKYSKAIELMKALPHDDPRSFMQQANVHCAYCEGAYDQVGFPNLELQVHNSWLFFPFHRYYLYFFERILGHLIDDPTFGLPFWNWDSPAGMRMPDMFMDTNSSLYDKFRNSRHYPPTMVDLDYNGEDEHETKMNKDQVKSNLRIMYRQMVSNAKTPRLFLGGPFRAGDEPYQGSGSIENVPHGPVHVWCGDDKQPNGEDMGTFYSAARDPIFYAHHSNVDRMWSVWKTIENINRKDFDDPDWLNASFLFYDENANLVRVKVRDCLDH…	62.61	0	gi|343157314|gb|AEL95440.1|	polyphenol oxidase [Populus euphratica]	-
3126	Cotton_D_gene_10018673	42776.3	0.122	4|4|-	6|4|-	1.25	-	0.040|0.214|-	Cotton_D_gene_10018673	MATNGTSDLKRKQGIVSSLCKHFSLDPKAFSSQVPGNDIKTLYINILKSSGKESPQNNDEVMKWIAFADSFPSDSKACHGGLNELNTDLAKKSVLLGNGFTPSEADVIVFSVIHSSMIALSTPEKEKLPHVMRWMDYIQNSEDLGALFEKILLEKPVFEPQIAKAAAKPEVTSSAKGTVQNTKIADKPDTEKNAKKSDSADAKKKAKGDKEAVPEKKAPEKEASDKDKELSVSLLNIQVGLIRKAWKHPSADSLLVEEIDVGEAKVRQVVSGLAKYCSPEDLTNRRVVLITNVKPGKLRDVMSEGLVLCASNEDHTKVEPLLPPEGAKPGECISFSGIDGKPEDVLNPKKKQLEKITPNLFTDEKGVATFKGIPFMTSAGPCTSSIPKASIK	69.87	1e-175	gi|224144994|ref|XP_002325488.1|	predicted protein [Populus trichocarpa]	CAC2991_2
3139	CotAD_17652	54296.9	0.036	-|1|-	-|1|-	1.88	-	-|0.008|-	CotAD_17652	MGSHCESSVKIPPIKFTKLFINGNFVDSISGKTFDTIDPRTGEVITKVSLGDREDVDLAVKAARHAFDYGPWPRMSGSERGRMMMKFADLIEENAEEIAALDAVNGGKLFTLCKAIDIPGAARSLRYYAGAADKIHGTVLKMSKGLQGYTLREPIGVVGSIIPWNFPTIMFFMKAAPALAAGCTLVVKPAEQTPLSALYYAHLAKLAGIPDGVLNVVNGFGETAGAAISAHMDIDKVTFTGSTEVGRKIMAAAAASNLKPVSLELGGKSPLLIFDDADIDQAADIAFRGMFYNKGEICVASSRVYVQEGIYEKLVKKLVEKAKATVVGDPFDPQVNQGPQTDKKQFEKILSYIEHGKREGATLLTGGKHVGQKGYYIEPTIFTDVNEDMIITKEEIFGP…	78.05	0	gi|255546541|ref|XP_002514330.1|	aldehyde dehydrogenase, putative [Ricinus communis]	VC0819
3150	CotAD_70037	29601.3	0.399	2|-|-	5|-|-	1.65	-	0.001|-|-	CotAD_70037	MGKGPGLYSDIGKKARDLLYKDYQADHKFTVTTYTSNGVAITSTGTKKGELLLADVNTQLKNKNITTDVKFDSRSNLFTTVTIDEPAPGLKTIFSFVVPDQKSGKVELQYRHEYAGISTGIGLTAKPLVSFSGVIGNDSVSVGTDLSFDTASGNFIKLNAGLNITHSDLIASMTLNDKGDTLTASYYHIVSPLTNTAVGAELTHSFSSNENTLTIGTQHALDPLTTVKARMNNYGRASALIQHEWRPKSLFTISGEVDTRAIEKSAKVGLALALKP	86.23	9e-178	gi|449458029|ref|XP_004146750.1|	PREDICTED: mitochondrial outer membrane protein porin of 36 kDa-like [Cucumis sativus]	-
3153	CotAD_34334	47297.2	0.068	-|-|3	-|-|9	1.85	-	-|-|0.001	CotAD_34334	MAMAMASVQLGRQTSIQDSPRSPEAKLGMQVEDLWDVQEPELSPNEKLNACFESIPVSAFPIAPQGIEIKSDASLAEAVQILAQNKILSAPVVDVDAPEDATWMDRYIGIVEFAGIAVWILQQSEPSSPRSPSSPNGAEFAIAANGMVSAAGLGALGPEDASITSGDFFEALTSSEFYKNTKVRDISGSFRWAPFLALQKSNTFLTMLLLLSKYKMKSVPVLDLGDGKIDNIITQSAVIHMLAECTGLHWFESWGSKKLSEIGLPTMSPDHIITVYEDEPVLQAFKLMRKKRIGGIPVIECGGKKAIGNISLRDVQFLLTAPDIYCDYRSITAKNFLIAVRNYLEKHEKRSPMLSGMITCKRDETVKELIQKLDSEKIQRVYVTDENGNLEGVITLRDI…	78.36	0	gi|255540259|ref|XP_002511194.1|	AMP-activated protein kinase, gamma regulatory subunit, putative [Ricinus communis]	PH0600
3156	Cotton_D_gene_10018990	22584.7	0.296	1|1|1	9|6|15	1.39	0.017	0.001|0.267|0.001	Cotton_D_gene_10018990	MQRAVRAFSVHGNTLKNAILHRIRVVNPVMRPVMFSRSLTSASMEEHGFESTTISDVLKAKGKGADGSWLWCTTDDSVYDAVKSMTQHNVGALVVVKPGEQKSIAGIITERDYLRKIIVHGRSSKSTKVGDIMTEENKLITVTPETKVLQAMQLMTENRIRHIPVINEKEMVGMVSIGDVVRAVVSEHRAELDRLNAYIQGGY	83.41	1e-124	gi|225434277|ref|XP_002262902.1|	PREDICTED: CBS domain-containing protein CBSX3, mitochondrial isoform 1 [Vitis vinifera]	SMa1521
3158	Cotton_D_gene_10020965	54126.3	0.078	4|-|-	10|-|-	1.22	-	0.008|-|-	Cotton_D_gene_10020965	MESVPDLQKSMYMVVDGYPCVRLVNLSGEIGCSNPGRDKVVAPIIKYKNNKELGLPSAILFVWSAVPPINNSSSNQSKPIILTVASMDAASFFRDKSLGADSPISGLISLLAAVDALSHVDGLDNLNKQLVFLVFTGEAWGYLGSRRFLLELDQQSDAVRGLNSSLIQLVMEIGSTGKGFSQGNKTFFAHTQVSSDTNEALDALKLAQESLKSEGVTVSNASSSNPGIPPSSLMAFLRKNSSTSGIVLEDFDTVFANKFYHSHLDDSANINSSAIVAAASLVARTLYVLASDKKDSTSSALSSINANASLVEELISCLLDCDPGLSCELVSSYITSVDTCPSYYVGVALGEPSSTPSPNQVDDISRFVWNFLADRTSTLKGNTTVCSKDCSNNGGVCIR…	76.02	0	gi|224077366|ref|XP_002305230.1|	predicted protein [Populus trichocarpa]	-
3182	Cotton_D_gene_10002490	16990.4	0.193	2|3|2	26|13|13	1.38	0.002	0.001|0.002|0.001	Cotton_D_gene_10002490	MAQEEVQNGGPEKVAEVSFTALKPQLMVEAPKAADAVQFYKTAFGAVEAGRTVYPKRKAEQEQPHVLSAQLELAGSTILVSDIADNSTPVKTEGTGCVLCLETEDVEAAIAKAVSAGGVAEGEVTEGDGACCGGRVGKVKDPYGYVWLICSPAKKCGDAEA	68.48	2e-63	gi|351723033|ref|NP_001235473.1|	uncharacterized protein LOC100306467 [Glycine max]	SMa2009
3198	CotAD_36391	73988.6	0.351	1|-|1	2|-|3	1.2	-	0.031|-|0.034	CotAD_36391	MKPQSLCIFFLLHFFALLCTAASEHEAPGTGGTIVFTTLGRSNYAWDIYTLPTSDPPSPSNELRVTDGESVNFNGHFPSTSPSSVLSLLHNRSLIRTPGPQAPPPLQLVYVTERNGMPNIYYDALYYGAPGSTRSRSALEVPVRLQAPLLGLEESKNRVSMKDRPSLSGENLIYVSTHEDPGEPRTSWAAVYSTHLGTGLTRRLTPSGIADFSPAVSPSGVWTAVASYGKEGWGGEVEELSTDIYVFLTRDGTHRVKVVEHGGWPCWVDDSTLYFHRRSEDQWISVYKATFPKDKPVSTELVTIQRVTPPGLHAFTPATSPGNHKFVAVATRRPNSSFRHIELFDTVKNEFTELTRHVSPTTHHLNPFISPDSARVGYHKCRGESNGAKATQLLLENVK…	62.17	0	gi|359492398|ref|XP_002285876.2|	PREDICTED: uncharacterized protein LOC100267814 isoform 1 [Vitis vinifera]	RSc0735
3208	CotAD_03617	34867.6	0.183	6|4|5	27|17|27	1.12	0.006	0.249|0.001|0.053	CotAD_03617	MSGLDRLQRMFAGAGGALGHPPPDSPTLDSSEQVYISSLALLKMLKHGRAGVPMEVMGLMLGEFVDEYTVRVVDVFAMPQSGTGVSVEAEDHVFQTNMLDMLKQTGRPEMVVGWYHSHPGFGCWLSGVDINTQQSFEALNQRAVAVVVDPIQSVKGKVVIDAFRLINPQTMMLGQEPRQTTSNLGHLNKPSIQALIHGLNRHYYSIAINYRKNELEEKMLLNLHKKKWTDGLTLRCFDTHSKTNEQTVQEMLNLAIKYNKAVQEEDELPPEKLAIANVGRQDAKKHLEEHVSNLMSSNIVQTLGTMLDTVVF	98.08	0	gi|224136700|ref|XP_002326923.1|	predicted protein [Populus trichocarpa]	YOR261c
3227	CotAD_10994	25424.8	0.43	1|1|1	10|7|5	1.39	0.013	0.001|0.011|0.014	CotAD_10994	MDLDMNVNAPHSMGTTIIGVTYNGGVVLGADSRTSTGMYVANRASDKITQLTDNVYVCRSGSAADSQIVSDYVRYFLHQHTIQLGQPATVKVAANLIRLLSYNNKNMLQTGLIVGGWDKYEGGKIYGIPLGGTLIEQPFAIGGSGSSYLYGFFDQAWKEGMTKEEAEQLVVKAVSLAIARDGASGGVVRTVVINSDGVTRNFYPGDKLQLWHDELEPQHSLLDILNAPSPEPMNI	92.64	6e-156	gi|255574159|ref|XP_002527995.1|	proteasome subunit beta type 6,9, putative [Ricinus communis]	SPAC4A8.13c
3228	Cotton_D_gene_10007270	25215	0.206	4|2|4	5|5|12	1.14	0.007	0.571|0.518|0.011	Cotton_D_gene_10007270	MNKGMVFGGRAACFLPIILVLCLTRNSNILPVAEAIWLTIPSSGTKCVSEEIQSNVVVLGDYYVIDENNPDHIPTISARVTSPFGNNLHHNENATHGQFAFTTSESGNYLACFWKDGSHQKDSELTLGVDWKTGIAAKDWESVAKKEKIEGVELVLRRLQGIVETIRGNLIYLRDREADMREVSEATNARVAWFSIMSLGVCIAVSVLQIWYLKRYFVKKKLI	70.48	4e-111	gi|255545458|ref|XP_002513789.1|	Transmembrane emp24 domain-containing protein 10 precursor, putative [Ricinus communis]	-
3234	CotAD_46761	31574.4	0.117	1|1|-	3|1|-	4	-	0.001|0.001|-	CotAD_46761	MYQIWKLMLLVSLLICHLLSKVPGTSSEPPKHFVLVHGACHGAWSWYKVVPLLKSGGHNVTALDLGGSGVDPQQVNTLRSISDYIKPLREFMASLPNEEKVVLVGHSLGGLAISQAMEMFPEKISVAVFVTALMPGPTLNASILTQKVLRDLDPQMENHYTYDDGPSSPPTTFTFRPMFLSSKLYQLSPPEDSALASMLMRPIRLYSAEDISRVIVLSQKIYGSVNRVFIISEKDLAIKEDIVGWMIRENPPHQVEVIKGSDHMVMMSKPIQLSNMLLCLAKN	65.25	1e-110	gi|225428683|ref|XP_002284944.1|	PREDICTED: polyneuridine-aldehyde esterase [Vitis vinifera]	XFa0032
3239	CotAD_40041	28169.7	0.188	1|1|2	2|3|10	1.48	0.203	0.156|0.976|0.001	CotAD_40041	MGFSLKLQYCLVSVMVLLPAVCYSQDYFVKSRATYYGSPDCLGTPSGACGFGEYGKSVNDANVAGVSRLYKNGTACGACYQVRCTNPQICADNGVNIVVTDYGEGDNTDFILSPRAYARMARPDTAAHLFAYGVVDVEYQRIPCQYGGYKTQVKVHEHSKYPNYLAIVVLYQAGKSEILSVDIWQEDCKEWIGMRRAYGAVFDMANLPSGDISLRFQVRGSAGLTWVQAPNVIPKYWKAGVAYETDIQLY	75.1	4e-136	gi|255580799|ref|XP_002531220.1|	Major pollen allergen Ory s 1 precursor, putative [Ricinus communis]	-
3248	CotAD_35578	39546.8	0.154	-|-|5	-|-|8	1.22	-	-|-|0.027	CotAD_35578	MAKSPEEEHPVKTFGWAARDPSGHLSPFTFSRRVTGEEDVRFKVLYCGICHSDLHSIKSEWGSSNYPMVPGHEIVGEVTEVGSKVEKVKVGDKVGVGCMVGACHSCDSCANDLENYCPKLILTYNGIYYDGTITYGGYSDSMVANERYVVRIPDGMPLDSAAPLLCAGITVYSPLKYFGLGEPGKHIGIVGLGGLGHVAVKFAKALGSKVTVISTSPNKKAEALEHLGADSFLVSRDQDELQAAMGTFDGIIDTVSATHPIMPLLGLLKSHGKLIMVGAPCEPLEVPAFSLIIGRKTMAGSGIGGMKETQEMIDFAAKHNIKADIEVISMDYVNKAMERLEQADVRYRFVIDIGNTLAATKPSS	84.81	0	gi|183585165|gb|ACC63874.1|	cinnamyl alcohol dehydrogenase [Populus trichocarpa]	Cgl0330
3257	Cotton_D_gene_10015670	17377.6	0.403	3|3|3	15|18|15	3.48	0.17	0.001|0.001|0.001	Cotton_D_gene_10015670	MGVFTYDYESTSPVAPVRLFKAFTIEAAKVWPTAAPNTVKSVEVEANPSSGSIVKINFVEGLPFQYMKHQIGGHDENNFSYSYSLIEGGPLGDKLEKISYENKFEAAASGGSICKSSMKFYTVGDNVITEDEIKALIKGSEGVYKPVEAYLLANPEACN	100	2e-114	gi|10505376|gb|AAG18454.1|AF305067_1	PR protein class 10 [Gossypium hirsutum]	-
3262	Cotton_D_gene_10017551	27241.3	0.612	5|5|7	38|30|32	1.27	0	0.001|0.001|0.001	Cotton_D_gene_10017551	MNDGDVSKQIQQMVRFIRQEAEEKANEISVSAEEEFNIEKLQLVEAEKKKIRQEYEKKEKQVEIRKKIEYSMQLNASRIKVLQAQDDVVNAMKESASKDLLNVSHDHHVYKRLLKDLIVQSLVRLKEPGVLLRCRKEDLHLVESVLDSAKEEYASKVNVHPPEIIIDDVHLPPGPSHHHGFFHHHAEAHGPFCSGGVVIASRDGKIVFENTLDARLDVAFNKKLPEIRKWLFGQVAA	98.31	3e-146	gi|3334405|sp|O23948.1|VATE_GOSHI	RecName: Full=V-type proton ATPase subunit E; Short=V-ATPase subunit E; AltName: Full=Vacuolar proton pump subunit E	ECU05g0405
3263	CotAD_36785	69897.6	0.339	2|2|2	4|8|8	1.2	0.024	0.092|0.808|0.011	CotAD_36785	MSNFYNQTRAASSLMRRLKRSLINPTAVSRARCFTTAEGHRPSLVHKRSLDILHDPWFNKGTAFSMTERDRLDLRGLLPPNVMSSEQQIERFMVDLKRLEVQARDGPSDPNALAKWRILNRLHDRNETMYYKVLIANIEEYAPIVYTPTVGLVCQNYSGLFRRPRGMYFSAEDRGEMMSMVYNWPADQVDMIVVTDGSRILGLGDLGVQGIGINRGKLDLYVAAAGINPQRVLPVMIDVGTNNEKLLKNPLYLGLQQHRLDGDEYIAVIDEFMEAVFTRWPNVIVQFEDFQSKWAFKLLQRYRNAHRMFNDDVQGTAGVAIAGLLGAVRAQGRPMIDFPKQKIVVAGAGSAGIGVVNAARKTMARLLGNTEHAFDSAKSQFWVVDANGLITDERENIDP…	87.74	0	gi|224067419|ref|XP_002302483.1|	predicted protein [Populus trichocarpa]	SA1524
3267	CotAD_52942	44891.5	0.125	2|4|4	4|10|9	1.23	0.015	0.422|0.003|0.005	CotAD_52942	MSKMLRVGSLKNAVTTLRYLQESSFSTAVIRQHSSSAPPFATTVRHLRTGRDPSFRYETSPPVNWGIRIVPEKKAYVIERFGKYLKTLPSGIHFLIPLVDRIAYVHSLKEEAIPIPDQSAITKDNVSILIDGVLYVKIVDPKLASYGVENPIYAVIQLAQTTMRSELGKITLDKTFEERDTLNEKIVEAINVAAKDWGLQCLRYEIRDISPPRGVRAAMEMQAEAERKKRAQVLESEGERQSNINIADGRKSAVILASEAARMDQVNRAQGEAEAILARAQATAKGIALVSQSLKENGGVEAASLRIAEQYIQAFSNIAKEGTTMLLPSSAANPANMIAQALTMYKNLVSNSSTGDSHVNNSLELSRSTKHAPPGETEGEIPNPRAVEARDTNHVGEVG…	79.89	0	gi|449438747|ref|XP_004137149.1|	PREDICTED: uncharacterized protein C16G5.07c-like [Cucumis sativus]	mlr3021
3278	CotAD_27922	12434.1	0.267	2|2|2	12|13|14	3.43	0.392	0.001|0.001|0.001	CotAD_27922	MASSMSLKLTCVVVFCMVVGAPLAQGAISCGQITSALAPCIAYLKGNGAGSAPPACCNGIRSLNSAAKTTPDRQAACSCIKSAATGISGINYSTAAGLPGKCGINIPYKISPSTDCKSIK	100	1e-79	gi|7012722|gb|AAF35185.1|AF195864_1	lipid transfer protein precursor [Gossypium hirsutum]	-
3292	CotAD_13644	21880.8	0.161	3|3|3	5|4|10	1.18	0.008	0.380|0.532|0.001	CotAD_13644	MANADVEAVDFEPEEDDLMDEDAAGDASPQAPMPKLKSAITGGASASLSAPKKTKGRGFREEDADRHSRLASRDFESLGTDGGPGPQRSIEGWIILVSGVHEEAQEDDLHNAFGEFGEIKNLHLNLDRRTGFVKGYALIEYEKFEEAKNAITTMDGAELLTQTINVDWAFSNGPSVGAFKRKNMRSGRTHRSRSPRRRY	82.98	7e-108	gi|255544924|ref|XP_002513523.1|	polyadenylate-binding protein, putative [Ricinus communis]	alr0741
3302	Cotton_D_gene_10017668	18150.9	0.066	1|1|1	9|6|4	1.22	0.003	0.014|0.040|0.295	Cotton_D_gene_10017668	MGRKSSMAMAAVFVVLASTLTTYASTTYTVGDSTGWQVPTSNSNLYDDWADNKTFVVGDDLLFKFITGEHDVAEVTEPGYDACTNTDTISTDNKGPVKITLKRTGDYYFICTYPGHCPAGQKLKVQVRSETGDTTPGVLSPPRNVASSLVVTISPVFVSIATFVLLC	50.75	3e-52	gi|319433445|gb|ADV57640.1|	copper binding protein 5 [Gossypium hirsutum]	-
3307	CotAD_13134	25256.6	0.226	1|1|1	12|21|22	1.2	0.002	0.001|0.002|0.001	CotAD_13134	MVTLSTPLSHNSLCSPELSTKRHGCPLHQPMYLSESPVLLLVMSSVQVMFWASKRVPKSEESSSPLRTVACGLLAVCTVATASPVIAANQRLPPLSTEPNRCERAFVGNTICQANGVYNKPLDLRFCDYTNEKSNLKGKSLAAALMSDAKFDGADMSEAVMSKAYAVGASFKANLQGAIFKNTVLSGSTFDNAQLEDAVFEDTIIGYIDLQKLFTNTSIRAEGRVELGCR	66.27	3e-101	gi|302143933|emb|CBI23038.3|	unnamed protein product [Vitis vinifera]	-
3308	Cotton_D_gene_10031722	64264.6	0.292	2|2|2	8|9|15	1.32	0.006	0.025|0.002|0.001	Cotton_D_gene_10031722	MSRIKETLSNISDSAKHISFTKKHKKIFLALFASLVIVAAIIGIVAGVSSRNNSDESDTSHHAIVKSACSGTFYPDLCFSAVTTVPAGTAKKVRSQKDVIELSLNITTTAVEHNYFKIKKLLARKDLTTREKTALHDCLETIDETLDELHEAVEDLHEYPNKKSLTQHADDLKTLMSAAMTNQETCLDGFSHEGADKKIREVLIDGEKYVEKMCSNALAMIKNMTDTDIANEMMLKSSNRKLKEDESGIAWPEWLSAGDRRLLQSSSVTPNVVVAADGSGNFKTLSEAVAKAPEKSSKRYIIRIKAGVYRENVEVPKKKSNIMFIGDGRTKTIITGSRNVVDGSTTFHSATVAVVGEKFLARDITFQNTAGPSKHQAVALRVGSDLSAFYNCDMLAYQD…	99.31	0	gi|377824753|gb|AFB77929.1|	pectin methylesterase [Gossypium hirsutum]	RSp0138
3311	CotAD_49900	30517.3	0.348	4|3|2	7|4|4	3.15	2.618	0.035|0.044|0.001	CotAD_49900	MAEKQYSADVVEGLRKILISEEVRLDEEVQGKVEMLIAELQRRIPFPVPDEDAQTLYNGFQSFKTNVFDQHPNLFCELAKAQHPRYLVFACSDSRVSPSTIFNFMPGQAFVSRNIANMVPPFDQLRHTETGAVIEYAIKALKVNNILVIGHSRCGGVERLMNLPDVSDHSHTYDFIDDWVKIGLPAKKKVLEENNGLPCEELLKLCEKESVNNSLGNLLTYPYVRDAMTSGHLALRGGYYDFVNGHFEQWRAFTPPPPVMPPMPQPF	56.18	5e-87	gi|28625017|emb|CAD66064.1|	carbonic anhydrase [Lotus japonicus]	STM0171
3326	CotAD_50303	18383	0.302	1|1|1	13|15|15	1.19	0.009	0.364|0.001|0.001	CotAD_50303	MASNPKVFFDMTVGGQPAGRIVMELFADCTPRTAENFRALCTGEKGVGRSGKPLHYKGSSFHRVIPNFMCQGGDFTAGNGTGGESIYGAKFADENFIKKHTGPGILSMANAGPGTNGSQFFICTTKTEWLDGKHVVFGQVVEGMDVVKAIEKVGSSGGRTSKPVVIADCGQL	97.09	2e-112	gi|194321208|gb|ACF48822.1|	cyclophilin [Gossypium hirsutum]	SPAC21E11.05c
3335	CotAD_02277	27933.3	0.118	3|3|2	11|8|7	1.74	0.016	0.001|0.001|0.001	CotAD_02277	MVLNCHVNEAALVLPKNVTVTAVFVFGDSIVDPGNNNNLPTIAKGNFLPYGRDFKDGPTGRFSNGKVPSDLIAEEFGVKGLVPAYLDPKTQLQDLLTGVSFASECNSDVGSVRAVQGMYKEDKRSSGRPHYDINGYAEFNARYANQFLQDLYGLGARRIGLLGLPPIGCVPSQRTIGGGKNRDCYEAENQLAIAYNAKLSGVIDSLKAVDTLPDTKFIFLDIYYPLLSLIQNPAKYANVVPKLSTKKGKDKVDEE	47.18	1e-65	gi|449434128|ref|XP_004134848.1|	PREDICTED: GDSL esterase/lipase EXL3-like [Cucumis sativus]	-
3336	CotAD_37501	55664.8	0.602	3|3|2	50|41|44	1.17	0.007	0.001|0.001|0.006	CotAD_37501	MAPSLTSNSFLLTTTPRSRVNLKYQRLVVFAKGSGPFSPFQFGKAKDNPEDGQAEDTGNSSPFRFDFGKLPDVKTLVPVVSNPSSGLSFGNVRRKDPSTVFVAGATGQAGIRIAQTLLRQGFTVRAGVPELAAAQELARLAAQYKIISNEESKRLNAVESTFQDAESIAKAIGNASKVVVTIGPGENGPTSAVSASDAVQVIQAAQLAGVGHVAIVYDGNPGNGSTYNVLDGITSFFSNLFSQSQPLSLSEFLQKIIETDVSYTFLKTTLTDDYSEESSYNVVVSAEGSIGTNDYKVAKSQIASLVADVFSNTAVAENKVVEVFTSPSAPSKSVDELFSAIPEDGRRKAYAEATARAKAEEEAVLAAEKAREAAEAAKKLEVEVKKLSEQEAKAANLAE…	74.33	0	gi|118486499|gb|ABK95089.1|	unknown [Populus trichocarpa]	-
3351	Cotton_D_gene_10035832	35753.6	0.083	2|-|2	7|-|4	1.22	-	0.033|-|0.625	Cotton_D_gene_10035832	MALWFCSARLFIFLFIVSALPIAYIIYQERAETDHHVFHYHSSGFFRESAKWDDQSRSFLVTFLEGGVGEIHVPQNYTRDVVLKEVTVVKDSDLTGNASLGLALDRPRNRLLVAVADMFGNRYSALAAYDLSTWKRLFLTKLSGSGDEKSLADDVAVDADGNAYVTDVKGSKLWKVGVDGEILSTLTNPLFTPKEWYKSLAGLSGIVYHPDGYLIVIHTLGGYLLKIDLAKGDEVKLIELAGGPLSFGDGLELISPTKLVVAAGNPSGRLVESTDGWETASVVAKFKGPMHRFATAATVKDGKVYLNHMVGMGYPKKTHALVEFVL	71.78	2e-163	gi|255548449|ref|XP_002515281.1|	conserved hypothetical protein [Ricinus communis]	-
3359	Cotton_D_gene_10000683	19338.1	0.134	2|-|2	8|-|3	1.97	-	0.001|-|0.276	Cotton_D_gene_10000683	MQQYSLKEKAEKSDVATKVADAEEVENSASTSSKEVVTEEVETPAPLVESTEVPPAVAEENTEANPVAENSVEDAQVAAEESNERTKESSGDAEETPEIKLETAPADFRFPTTNQTRHCFTRYIEYHRCVAAKGEDASECDKFAKYYRALCPGEWIDRWNEQRENGTFPGPL	64	1e-64	gi|118488086|gb|ABK95863.1|	unknown [Populus trichocarpa]	-
3360	CotAD_56100	55668.5	0.343	5|6|1	31|20|4	1.24	0.001	0.001|0.001|0.022	CotAD_56100	MEVTAIWLLLLLPCSFPSFLISSCMGNQIDYLNRLVASRRSSNPRRPESWAQLDDQGNSHSSPVFVGSQKGLMQADKIDKLPGQPEGVDFDQYAGYVTVDPVADRALFYFFVESPVNSPNKPLVLWLNGGPGCSSLGYGAMQELGPFRVNSDGKTLYRNEYAWNNGTVANVIFLESPAGVGYSYSKNSSDYTQVGDKRTAEDSYVFLLNWLERFPQYKTRDLFITGESYAGHYVPQLASYILSRNKNTNQTVINLKGIAIGNAWIDDNICTKGLFDYLWTHALNSDETNEGVNKYCDFASQDLVTNKAVAKNATDQCDQYQSRALTEMGDIDLYGIYSPLCNSSAIKPGSDGNVLNFDPCSDVHVKSYLNLAKVQAALHAKATKWSACSGVGWTDSPTS…	70.28	0	gi|225458529|ref|XP_002282331.1|	PREDICTED: serine carboxypeptidase II-3-like [Vitis vinifera]	SPAC1296.03c
3375	CotAD_38066	62409.8	0.274	1|-|8	1|-|27	1.25	-	0.013|-|0.001	CotAD_38066	MANSKKPGGLREMLESMYSVIALLFILVACVELCDAAAAVDVYRLIQYDMSGSPFGSRFAALNHHAASLHFPPGVDLSRTVLIIPLRELNITFVREYINQKNPLGGLLVLLPEVLSFKTGGNKQVHEKEKMKILLAELERLLVHSNIPYPVYFAFENDEIDTVLADIKKNDLMGQPATATTGGYKFVIPTAEPKKVASPTMTNIQGWLSGLKTDGDANQLPTIAIVASYDTFGAAPALSVGSDSNGSGIVALLEIARLFSLLYSNPKTRGRYNLLFGLTSGGPYNYNGTQKWLRSFDQRLRESIDYAICLNSIGSWDNELWIHVSKPPENAYIKQIFEGLSNVAEELDLKVGLKHKKINISNPRVAWEHEQFSRLRVTAATLSELSVTPELLESTGGLF…	82.71	0	gi|462400643|gb|EMJ06200.1|	hypothetical protein PRUPE_ppa003566mg [Prunus persica]	-
3377	Cotton_D_gene_10003819	19558.4	0.121	2|-|1	5|-|4	1.31	-	0.048|-|0.596	Cotton_D_gene_10003819	MATEEISRTQGLNPSQQSSSLPDYPQMILEAIEALNEREGSSMSSIAKHIDSTHSDLPASHTTLLSHHLNQMKQMGQIVMLNNNYSKPDPNAPPKRGRGRPPKPKVPLPPGVVVSPPRPRGRPPKPKDLLAPPKPKPVSTGRPRGRPPKKAKTGTATAPPPPPGVKRGRGRPPKVLPSVGFQ	58.7	3e-30	gi|462411196|gb|EMJ16245.1|	hypothetical protein PRUPE_ppa012096mg [Prunus persica]	-
3384	CotAD_40976	60441.8	0.201	-|2|2	-|4|7	1.13	-	-|0.898|0.012	CotAD_40976	MQLHLAVVLLCATAGLFAIAGAEDPYRFFDWNVTFGDIYPLGVRQTGILINGQFPGPDIHSVTNDNLIINVHNSLNEPFLISWSGIQQRRNSYEDGVYGTTCPIPPGKNFTYILQVKDQIGSFFYFPSLAFHKAAGGFGGIRILSRPRIPVPFPDPAGDYTVLIGDWYKSNHTNLKARLDRGKKLPFPDGILINGRGPGGASFNVEQGKTYRLRISNVGLQNSLNFRIQNHRLTLVEVEGTHTLQTTYSSIDLHLGQSCSVLFKADQPAKDYYIAVSTRFTSRVLTSTAILRYSNSAGPVSGPPPGGPTIQIDWSLNQARSIRTNLTASGPRPNPQGSYHYGLINTTRTIRLANSAGQVNGKQRYAVNSVSFVPADTPLKLADYFKIGGVFHVGSISDN…	86.11	0	gi|356517572|ref|XP_003527461.1|	PREDICTED: L-ascorbate oxidase homolog [Glycine max]	SMc02282
3388	CotAD_53190	28303.6	0.322	7|4|3	19|24|19	1.24	0.002	0.001|0.003|0.001	CotAD_53190	MTQSSNNRQGKSPAEEFAPLATTFRRRLLAGVGSASLVAVGANFGGLTSFLLGLVPESGRSLKLDVLYPIEGYSRRIENNEGFEFIYPASWVGDQRLLYRAAERLERSLDPLPTNSPKSGNRPRKNVNEPIVAYGPPGSSGELNVSVIVSPVPLDFSIETFGGPKEVGEAVVKTITGQRSDVKGTLIESTMREDPKMNVKYYELEFKVESPSFKRHNVAVCCARGGRLFTLNAQAAESAWPELKSAFYRIANSFNLTS	72.06	3e-126	gi|225450829|ref|XP_002279749.1|	PREDICTED: uncharacterized protein LOC100244224 [Vitis vinifera]	-
3392	Cotton_D_gene_10015406	19641.9	0.266	1|1|1	9|6|7	1.15	0.007	0.011|0.411|0.454	Cotton_D_gene_10015406	MIIPEKNRREISKYLFQEGVCYAKKDYNLAKHPEIDVPNLQVIKLMQSFKSKEYVRETFAWMHYYWYLTNDGIEFLRTYLNLPSEIVPATLKKQAKPAGRPMGPPGDRPRGPPRFGDGERRFGDRDGYRGGPRGGGDFGDKGGAPADYQPSFRGPGTRPAFGRGGGGYGGAGPAGLP	98.96	4e-66	gi|462414949|gb|EMJ19686.1|	hypothetical protein PRUPE_ppa012085mg [Prunus persica]	YOR293w
3401	Cotton_D_gene_10026269	24369.3	0.387	5|-|1	6|-|1	1.53	-	0.015|-|0.506	Cotton_D_gene_10026269	MAQSSGSNTGKKLIRIDVSSDSVCPWCFVGKRNLDKAIAQAKDQFDFEIKWHPFFLDPSAPKEGVSKREYYEKKFGSRTQGILARMTEIFRNVGLEYDMSGLTGNTLDSHRLIYFAGKQGLDKQHALVEELYLGYFTQGKYIGDREFLLESARKVGVEGAAEFLENPNNGVKEVNEDLEKYSANISGVPNYVINGKQQLSGGQPPEVFLRAFQVAAK	80.09	5e-133	gi|225451823|ref|XP_002281555.1|	PREDICTED: uncharacterized protein ywbO [Vitis vinifera]	BS_ywbO
3402	CotAD_08523	28235.4	0.028	-|1|-	-|1|-	6.18	-	-|0.034|-	CotAD_08523	MMLLAKLLHSRGFFITFVNTEFNHRRLDWSKGPDFVKGLPDFQFETIPEGLPSSDRNETQDLRVLCDSIRKHCLAPFVELLAKLNSSPQVPIITCIISDGLMSFAIKAAEQLGIPEVQFWTASACSFMGYLHFSELVKRGIIPFQSETFLNEPIDWVPRMSNIRLRDFPSFVKANDPNDILFDYFGSEAQNCLKASAIIFNTFEEFEHEVLDAIATKFPRIYTIAPLHLLARHLLADPSKSMNPSL	69.7	6e-117	gi|462403290|gb|EMJ08847.1|	hypothetical protein PRUPE_ppa021414mg [Prunus persica]	-
3403	CotAD_30510	12372.2	0.15	-|1|1	-|1|2	7.72	-	-|0.019|0.082	CotAD_30510	MAALKLVCALVLCMLVVEPIATTTITCGDVTSKVAGCLSYLQNGGNVPKACCDGIRSLNNMARTTPDRQTVCGCLQAAAKAVKIKGNLAETLPAKCSVNIPYKISTSTNCKKY	67.02	1e-36	gi|329762910|gb|AEC04836.1|	lipid transfer protein [Dimocarpus longan]	-
3404	CotAD_40111	61050.3	0.263	1|-|-	2|-|-	2.04	-	0.036|-|-	CotAD_40111	MGRFALLLLLAFASFQALCFAADDDTVFYDSFDEPFDGRWIVSDKDDYKGVWKHSKSEGHDDYGLLVSEKARKYAIVKELNEPVSLKDGSTVLQFETRFQNGLECGGAYLKYLRPQEAGWKAKEFDNESPYSIMFGPDKCGATNKVHFILKHKNPKSGEYVEHHLKYPPSVPSDKLTHVYTAILKPDNEVRILIDGEEKKKANFLSADDFEPPLIPAKTIPDPDDKKPEDWDERAKIPDPNAVKPDDWDEDAPMEIEDEEAVKPEGWLDDEPEEIDDPEATKPEDWDDEEDGEWEAPKIDNPKCETAPGCGEWKRPMKMNPAYKGKWSAPLIDNPNYKGIWKPQEIPNPDYFELDKPDFEPIAAVGIEIWTMQDGILFDNILIAKNDKVAESYRETTWK…	85.65	0	gi|356508884|ref|XP_003523183.1|	PREDICTED: calnexin homolog [Glycine max]	-
3414	CotAD_37765	31041.4	0.254	5|4|3	17|25|16	1.91	0.017	0.001|0.001|0.001	CotAD_37765	MAASFSSTTLFRPNLNPPKSFLSHSDCAQKGFGRVKCHFINVSAHSWSSAANYASIRHVAVKSSGKHVVVKHLLRKRVGLVKCATIEEIEAEKSSIEKDVKERMEKTIETVRANFNSIRTGRANPSMLDKVEVEYYGTPVSLKSIAQISTPESSSLLIQPFDKSSLKAIEKAIVNSDLGMTPNNDGEVIRLSLPQLTTERRKELSKVVAKQAEEGKVAVRNIRRDALKAYEKLEKEKKLSEDNVKDLSSDLQKLTDEYMKKIDGIYKQKEKELLTV	74.54	4e-115	gi|118489544|gb|ABK96574.1|	unknown [Populus trichocarpa x Populus deltoides]	Rv2882c
3422	CotAD_55720	49662.3	0.062	3|1|1	9|3|6	1.19	0.093	0.521|0.926|0.004	CotAD_55720	MSEFTRYSRVLLLMVLGLSAGACYGFGTFGFEFHHRYSDPVKQILAVDELPAKGSPEYYSAMIHRDKIIKGRRLAAENDQTPVTFLEGNATYRLSSLGYLHYANVTVGTPALWFLVALDTGSDLFWLPCDCSSCVQAIESPGGPRIDFNIYSPNTSSTSSTVPCSSDKCEQHRKCSSPSSNCPYQVIYLSNGTSSIGVLVEDVLRLTTDDDKTNKPVDAKITFGCGKIQTGSFLNGAAPNGLFGLGMDNISVPSILAKENVTSNSFSMCFRSDGIGRITFGDKGSSDQGETPINLRQSRPTYNISITQINVGGNTGDLEFDAVFDSGTSFTYLNDPAYTLISETFNNLALDKRHTSKSTDDLPFEYCYELSANQTSLKYPVVNLTMKGGDQLLVNDPIA…	69.63	0	gi|255586856|ref|XP_002534038.1|	Aspartic proteinase nepenthesin-1 precursor, putative [Ricinus communis]	-
3426	CotAD_22030	37360.3	0.204	4|3|3	5|4|6	1.13	0.018	0.759|0.905|0.014	CotAD_22030	MAVYCNSAPFSCKAWRNRDPTPLSALLPTRLFSLLQHPFSFHPDRLKLSTCRWDKVASAVVSEESAVGSSSSGTDVFNLTYLEGNSWLWDISGVRVLVDPILDFGIPWLYDAAKKFLKNFELTDLPQVDCLLITQSLDDHCHLKTLKPLSEMSPNLRVIATPNAKSLLDPLFRNVTYLEPGQEPEVEAANGSKVRIQATAGPGLGRPWQRPENGYLVISPQGQLTLYYEPHCVYNKDFLEKEHADIVITPVIKQLLPNFTLVSGQEDAVQLAKLLHAKFIVPMKNGDLDSKGFLASIVQGEGTIESFKELLSKELPDAKTLEPTPGEPLQIPPP	73.96	1e-165	gi|225423905|ref|XP_002281785.1|	PREDICTED: uncharacterized protein LOC100247534 [Vitis vinifera]	sll0157
3429	Cotton_D_gene_10028000	11226	0.086	-|1|1	-|2|3	1.59	-	-|0.328|0.017	Cotton_D_gene_10028000	MAAQPKRGGVHLPARRSASNSDPSILTKITSSAIVSRGKQAACDAAFVSNKLLRSTGKAAWIAGTTFLILFVPLIIEMDREQQFNELEIQQASLLGAPPTGPPHK	72.38	6e-50	gi|224065545|ref|XP_002301850.1|	predicted protein [Populus trichocarpa]	-
3434	Cotton_D_gene_10000809	53640.1	0.217	9|7|8	32|23|32	1.27	0	0.001|0.001|0.001	Cotton_D_gene_10000809	MGRWNRFGGVFFSIALAAVAVRVGVKGYPAEDLVVKLPGQPPVGFKQYAGYVDVDVKAGRSLFYYFVEADKNPEKQPLTLWLNGGPGCSSVGGGAFTELGPFYPRGDGRSLRINSMSWNKASNLLFVESPVGVGWSYSNTSSDYIRGDASTAKDMYIFMMKWYEKFPEFKSRELFLTGESYAGHYIPQLAEVLLDHNARSKGFKFNIKGVAIGNPLLRLDRDVPATYEFFWSHGMISDEVGLTIMNECDFDDYVFESPHNVSRPCSQAIVEANRIVGNYVNNYDVLLDICYPSLVEQELRLRKMATKISIGIDVCMSFERRFYLNLPEVQMALYANRTKLPYDWSMCSGRLSYSDSDGNINILPILKKIILNGIPVWIFSGDQDSVVPLLGSRTLVREL…	79.06	0	gi|470108520|ref|XP_004290564.1|	PREDICTED: serine carboxypeptidase-like 42-like [Fragaria vesca subsp. vesca]	SPAC1296.03c
3438	CotAD_25996	100546	0.209	2|12|2	6|41|3	1.4	0.003	0.006|0.001|0.102	CotAD_25996	MVVFENKAIPKLLLVCLFVQFSVSAANFFQPFNVTYDHRALIIDGKRRMLISGGIHYPRATPQMWPDLIAKSKEGGADVIESYTFWNGHEPVRGQYNFEGRFDLVKFVKLVGDNGLYFLLRIGPYVCAEWNFGGFPVWLRDIPGIEFRTDNEPFKREMQRFVTKIVDLMLEEKLFSWQGGPIILLQSHKYMEGSYGHNWKEYVKWAANMALGLGAGVPWVMCKQTDAPGDIIDTCNNYYCDGYKPNSPNKPTIWTENWDGWYTSWGGRLPHRPVEDLAFAVARFFQRGGSLMNYYMYFGGTNFGRTSGGPFYITSYDYDAPIDEYGLRSEPKWGHLNDLHAAIKLCERALVAADSPQYMKLGPRQEAHVYWENTQSAVLNTTLSESQSACSAFLANIDE…	74.63	0	gi|462424288|gb|EMJ28551.1|	hypothetical protein PRUPE_ppa001149mg [Prunus persica]	PH0511
3443	Cotton_D_gene_10007846	19901.1	0.107	1|1|-	5|7|-	1.91	-	0.068|0.011|-	Cotton_D_gene_10007846	MAASDKVQELHVYEMNERDRGSPAYLRLSQKPVNSLGDIVPFSNKIYRGDLEKRIGITAGMCILIEHKPELKGDRYEAIFSFYFGDYGHIAVQGPYLTYQDSYLAITGGSGIFEGVSGQVKLHQIVFPFKIFYTFYLKGIGELPEELLCKPVDPHPAVEAAPAAKACEPHAAIANFTN	85.21	2e-88	gi|462411191|gb|EMJ16240.1|	hypothetical protein PRUPE_ppa012079mg [Prunus persica]	-
3446	CotAD_09100	27977.8	0.161	2|2|2	5|7|13	3.01	0.029	0.077|0.011|0.001	CotAD_09100	MAFLSKIGNMLRQTSTTQINAQLSASSPSLFQVFRCMSNAPSSKLFVGGISYQTDDQGLREAFSKYGEVIEARIIVDRETGRSRGFGFVTYTSSKDASSALQALDGQTLHGRQVRVNYATERAPRNFGGGGYGGGGYGGGGYGGGGYGGGGYGGGDYGRNAAPTSGNYGGNVGYGGSGNYGGQGSHGGFGQSDATNYESGSFSVAGGGGGIDGVGTGGSAGFGSPNMGIDSVDKFSSTEDGFKEEEAFDSNEPMNENFRDEDDENGSDFAKRA	71.65	6e-61	gi|118488717|gb|ABK96169.1|	unknown [Populus trichocarpa]	SPAC19A8.13
3449	Cotton_D_gene_10013208	16864.9	0.348	2|2|2	10|8|9	1.39	0.001	0.001|0.016|0.021	Cotton_D_gene_10013208	MRFSRALKVAPILLLLLILFTFANAKKSADVTQLQIGVKHKPKSCEFQAHKGDRIKVHYRGKLTDGTVFDSSFERGDPIEFELGSGQVIKGWDQGLLGMCVGEKRKLKIPAKLGYGDHGSPPKIPGGATLVFDTELVAVNGKPSSGGDNTSEDEL	88.24	3e-83	gi|255587693|ref|XP_002534360.1|	fk506-binding protein, putative [Ricinus communis]	YPO3532
3450	CotAD_07984	85089.5	0.265	13|9|7	61|49|35	1.65	0	0.001|0.001|0.001	CotAD_07984	MSRTTKPDSLTLLLLLLIAILSISSVESGRPPFACDPRNGLTRSLRFCRTNLPIHVRVRDLLGRLTLPEKIRLLVNNAIDVPRLGIRGYEWWSEALHGVSNVGPGTKFGGSFPGATSFPQVITTAASFNESLWERIGQVVSDEARAMYNGGMAGLTYWSPNVNIFRDPRWGRGQETPGEDPVLAGKYAASYVRGLQSATGNRLKVAACCKHYTAYDLDNWKGVDRFHFNARVSKQDLADTYNVPFKACVVEGKVASVMCSYNQVNGKPTCAAPDLLKGSIRGQWHLNGYIVSDCDSVGVMYDTQHFTVTPEESAAATIKAGLDLDCGPFLAIYTDLAIRRGLLTVTDVDMALANTVTVQMRLGMFDGEPSAQPYGHLGPRHVCTPDHKQLALEAARQGI…	78.72	0	gi|224111912|ref|XP_002316021.1|	predicted protein [Populus trichocarpa]	lin1840
3473	CotAD_08781	34151	0.34	4|4|1	43|58|1	1.44	0.007	0.001|0.001|0.001	CotAD_08781	MGEKSLIAKDVTELIGNTPLVYLNNVVDGCVAKIAANLEPMEPCSSVKDRIGYSMIADAEEKGLIVPGESVLIEPTSGNTGIGLAFMAAAKGYRLIITMPSSMSLERRMVLRAFGAELVLTDPARGMKGAVQKAEEIMSKTPNSYILQQFENPANPKIHYLTTGPEIWKGSGGKVDVLVSGIGTGGTVTGAGKYLKEQNPGIKLVGVEPVESAVLSGGKPGPHKIQGIGAGFIPGVLDVNLIDEVVQISSEVAIETAKQLALKEGLLVGISSGAAAAAAIEIAKRPENARKLIVVVFPSFGERYLSSVLFESVKREAESMVFEP	91.3	0	gi|255542380|ref|XP_002512253.1|	cysteine synthase, putative [Ricinus communis]	ECs3286
3474	CotAD_73404	16132.3	0.259	1|1|-	12|6|-	1.27	-	0.034|0.034|-	CotAD_73404	MTEAVIRKKPGMASVKDMPLLQDGPPPGGFAPVRYARRIPNKGPSAMAIFLAAFGAFSYGMYQVGQGNKIRRALKEEKFAARRAILPVLQAEEDERFVKEWKKYLEYEAEVMKDVPGWKVGENVYNSGRWMPPATGELRPEVW	97.12	7e-96	gi|16973316|emb|CAC84110.1|	F6 [Gossypium hirsutum]	-
3475	Cotton_D_gene_10008412	112927	0.271	20|15|16	116|65|75	1.31	0	0.001|0.001|0.001	Cotton_D_gene_10008412	MGAVELIGVVLFLGVLCAESKYMVYNTSAGIDAGKINVHLVPHTHDDVGWLKTVDQYYVGSNNSIQAFFQRWWNDQSELTQSIVKKLVNSGQLEFINGGMCMHDEAVPHYIDMIDQTTLGHRFLKEEFGVTPRIGWQIDPFGHSAVQAYLLGAEVGFDSFFFGRIDYQDRIKRKKEKSLEVIWRGSKSLGSSAQIFAGAFPENYEPPPGFYFEVNADSPVVQDNVNLFDYNVQDRVNDFVAAAIAQANITRTNHIMWTMGTDFRYQYAHTWYRNMDKLIHYVNKDGRVNALYSTPSIYTDAKYATSKSWPLKIEDYFPYADRANAYWTGYFTSRPALKFYVRKMSGYYLAARQLEFFKGRNDSGPNTDSLADAMAIAQHHDAVTGTEKQHVANDYAKRL…	75.47	0	gi|440546588|gb|AGC10269.1|	alpha-mannosidase [Prunus persica]	BH0791
3476	Cotton_D_gene_10005521	58755	0.281	10|10|10	36|42|60	1.73	0.008	0.001|0.001|0.001	Cotton_D_gene_10005521	MAINPSLLFLSLLFLFNGCLARQTFSSQQSQNECQINRLRASAPQTRIRSEAGTTEWWNPNCQQLRCAGVSVMRQTIEPNGLVLPSFTNAPQLLYIVQGRGIQGIVMPGCAETFQDSQQWQHQSRGRFQDQHQKVRRFRQGDIIALPQGVVHWSYNDGNERVVTINLLDTGNSANQLDNIPRRFHLAGNPEEEQRQLRRLAQQMQGRSERGEESEEEEGEGEEEEEDNPSRRSRHQEEEEQGRESSSCNNLLCAFDRNFLAQAFNVDHDIIRKIQRVRGNRGTIIRVRDRLQVVTPPRMEEEEREERQQEQRYRHTRGGSQDNGLEETFCSMRIKENLADPERADIFNPQAGRISTLNRFNLPILQRLELSAERGVLYNRAGLIPQWNVNAHKILYMLR…	96.46	0	gi|3915742|sp|P09802.2|LEGA_GOSHI	RecName: Full=Legumin A; AltName: Full=Beta-globulin; AltName: Full=LEGA-C94; Contains: RecName: Full=Legumin A acidic chain; Contains: RecName: Full=Legumin A basic chain; Flags: Precursor	BS_yvrK
3493	Cotton_D_gene_10020896	25816.1	0.131	3|3|3	19|19|18	1.24	0.003	0.001|0.002|0.001	Cotton_D_gene_10020896	MAAFIPFKLSLLLSLLSNIGFLPETSKNDVGIFPPTCNRIECPSFDLIEVGNGYEIRRYNSTIWVTTSPIQDISLVEATRTGFLQLFDYIQGKNKYKQQIEMTAPVITEVLPSDGPFCESSFRISFYLPKVNQANPPPAEGLHIQKWKSTYLAVRQFSGFVTDYNVGVEAAALEASLADTVWSPAIKKSQKDETTSVYLVAQYNSPFEFSGRVNEIWMLADLEDELLPV	74.88	3e-115	gi|462407849|gb|EMJ13183.1|	hypothetical protein PRUPE_ppa010934mg [Prunus persica]	-
3517	Cotton_D_gene_10010730	31662.2	0.025	-|1|-	-|1|-	5.26	-	-|0.043|-	Cotton_D_gene_10010730	MGTQLRLFLELPTPPLTSSPPLRLNKSLVITNNILRCNSTCFHRRNGRFRLDPPNPDDDDDEFEFTSAAKQRNWWSGYDDYDDVWEFDEDNEFWVFKIFRAFGWMLPAIAISLLLGTGPNAFIMALAVPLGQSALSLVFDKVSGRTSESWKSAPRRKTKKKQFTRAAANNTRTNKGKQEPNKTGGEKESYSSWLNTDGGLQGKGGQRVPKYGGWDQLDDQVETQKRATSRKGNGAPKQRKEDKFSRVGRDRVRDTPLLLRLLIAVFPFLGSWTRFLF	54.75	3e-59	gi|255561999|ref|XP_002522008.1|	conserved hypothetical protein [Ricinus communis]	-
3525	CotAD_29871	22657.7	0.749	1|1|1	1|2|3	1.66	0.064	0.001|0.288|0.004	CotAD_29871	MATQAGLFTPTITTSKSLAPWNPSSPFSLATPKSINFSMDQRTSIRAAAADEAAATAATKEAPVGFTPPELDPNTPSPIFGGSTGGLLRKAQVEEFYVITWDSPKEQIFEMPTGGAAIMRQGSNLLKLARKEQCLALGTRLRSKYKIKYQFYRVFPNGEVQYLHPKDGVYPEKVNPGRQGVGQNFRSIGKNVSPIEVKFTGKQVYDL	81.99	6e-118	gi|157678962|dbj|BAF80479.1|	PSI reaction center subunit II [Citrus sinensis]	-
3531	CotAD_27868	13744.9	0.055	-|1|1	-|7|7	1.18	-	-|0.041|0.075	CotAD_27868	MAQKMLMMAVLVILGTKIATFTAADPTCLQSLMSCAPYFNNATLQLKGDCCNPLRQAVATELTCLCSLINNSTLLSSFNINIPIPAALRITRGCGVTDKMNGCIPATLTPAPSPSATSPKAAPLITR	39.76	1e-13	gi|357123498|ref|XP_003563447.1|	PREDICTED: lipid transfer-like protein VAS-like [Brachypodium distachyon]	-
3533	Cotton_D_gene_10011456	29723.1	0.057	-|2|2	-|3|5	1.74	-	-|0.033|0.105	Cotton_D_gene_10011456	MALQLFIIFALSLLLGIASAIDVFRGMEFGYSGHNGPDKWGKLNPTFSPCSTGKRQSPINIQRNLTVHNKLLKPLTRNYESANATLVNRGYSVGVRFEESPGDLWINDKNYTLQQFHWHLPAEHHIEGQRFAAELHMVHRAADNSAVVVSMLYHESKADPLFSMIMEGLKHLGKENTEVPLGTLNINELNRRPRKYYTYVGSLTTPPCTENVIWIILGKVMSISKEQITTLDSPLNSHCKKNARPCQPLNGREVDMYDELN	51.67	4e-89	gi|462398929|gb|EMJ04597.1|	hypothetical protein PRUPE_ppa021144mg, partial [Prunus persica]	HP1186
3547	CotAD_52285	40294.9	0.231	1|1|1	7|4|6	1.31	0.026	0.638|0.045|0.003	CotAD_52285	MGKWCGVFGVAALLLVLSVFLGVRGAPQVPCYFIFGDSLVDNGNNNQLSSLARANYLPYGIDFPNGPTGRFSNGKTTVDVIAELLGFDNYIPPYSTASGRQILGGVNYASAAAGIREETGQQLGARISFSGQVRNYQRTISQVVNLLGDETTAANYLSKCIYSIGLGSNDYLNNYFMPLYYSTSRQYTPEQFADVLIQQYTEQLQALYNYGARKFALIGVGQIGCSPNELAQYSGDGKTCVERINAANRIFNDKLKGLVDQFNNDNSDAKFIYINAYGIFQDITSNPATYGFKVTNAGCCGVGRNNGQITCLPAQTPCPNRNEYLFWDAFHPTEAANVIIGRRSYSAQSSSDAYPIDIRRLAQL	83.43	0	gi|225462452|ref|XP_002266118.1|	PREDICTED: GDSL esterase/lipase At5g45670 [Vitis vinifera]	VCA0218
3550	Cotton_D_gene_10040312	41763.3	0.166	-|-|2	-|-|4	2.36	-	-|-|0.022	Cotton_D_gene_10040312	MAPSTLTALAEEKTLQASFVRDEDERPKVAYNQFSNDIPVISLAGIDDVDGKRGEICKKIVEACEDWGVFQVVDHGVDTKLVSEMTRFAREFFALPAEEKLRFDMSGGKKGGFIVSSHLQGEAVQDWREIVTYFSYPLKSRDYSRWPDKPEGWIEVTKEYSERLMGLACKLLEVLSEAMGLEKEALTKACVDMDQKVVVNFYPKCPQPDLTLGLKRHTDPGTITLLLQDQVGGLQATRDNGKTWITVQPVEGAFVVNLGDHGHYLSNGRFKNADHQAVVNSNCSRLSIATFQNPAPDATVYPLKIREGEKPILEEPITFAEMYRRKMSKDLELARLKKLAKEQQQLKEKEAENEKPKLEAKPLEEILA	99.7	0	gi|121755803|gb|ABM64799.1|	flavanone-3-hydroxylase [Gossypium hirsutum]	RSp1529
3561	CotAD_23902	27431.3	0.172	4|2|3	24|17|29	1.24	0.004	0.003|0.001|0.001	CotAD_23902	MASTFSLQMVHCPRFSFQGQAVSNAHSPNMIGSWSAYSQPNSSATVLASKLNYASGLPVTQLSKSPSVKYRRMVCNSMANDVELQAKVTTKCFFDVEIGGKAVGRIVMGLFGDVVPRTVENFRENGYGFKGCSFHRVIKDFMIQGGDFTNGNGTGGMSIYGSKFEDESFALKHVGPGVLSMANAGPNTNGSQFFICTVKTPWLDNRHVVFGHVIDGMDVVRELESQETSRTDGPRVPCRIVNCGELPIGG	68.56	1e-116	gi|224064414|ref|XP_002301464.1|	predicted protein [Populus trichocarpa]	SPAC21E11.05c
3590	CotAD_11902	29532.1	0.211	-|4|-	-|11|-	1.8	-	-|0.001|-	CotAD_11902	MSTSSSAVSTQKRLEGKVALITGGAGGIGEATARLFVQHGAKVVIADIQDDLGQAISQELGEENISYVHCDVTLDSDVGNAVDFAVSKHGKLDIMFNNAGISSPDKNIVTSNDERFKRVLDINIFGGYLGSKHAARVMIPAKKGCILFTTSVWSVIGSADVGHAYVTSKHALVGLAKNLGVELGQYGIRVNCISPHGVATPMLTRPFGNLEKEKVEELIAMGSNLKGVVLEPEDVAQAALYLASDDAKYVSGLNMIIDGGYSTTNPSLSNVMKSLSSKV	69.4	1e-120	gi|224140059|ref|XP_002323404.1|	predicted protein [Populus trichocarpa]	lin1921
3591	CotAD_59845	48801.9	0.123	1|1|1	2|1|1	1.69	0.02	0.001|0.001|0.001	CotAD_59845	MQVLVCSNSCSLNLNSNNVKSHLLIGRRELLSTLCSTGSHKEIVSHKPISILRMISERMADFGEVIIGKSIPFATRRVLLAGLFACWTFHPSRYLSAQALGDPSVTVEDVTPPVLPSGVLFPSEERTVQLFEKNTYSVVNIFDVTLRPQLNVTGAVEIPEGNGSGVVWDEQGHIVTNYHVIGNSLSRNPSPGQVVARVNILASDGVQKNFEGKLIGADRSKDLAVLKVEASEDLLRPIKVGQSSYLRVGQQCLAIGNPFGFDHTLTVGVISGLNRDIFSQTGVTIGGGIQTDAAINPGNSGGPLLDSKGNLIGINTAIFTQTGTSAGVGFAIPSSTVLKIVPQLIKFGKAVRPGLNIEIAPDLIANQLNVRKGALILQVPSNGLAAKAGLLPTTRGFAG…	79.41	0	gi|359488915|ref|XP_002278099.2|	PREDICTED: protease Do-like 8, chloroplastic-like [Vitis vinifera]	BMEI0613
3594	CotAD_39749	44294.1	0.263	2|2|2	8|4|11	1.73	0.13	0.013|0.338|0.001	CotAD_39749	MVQTNQSGSGNDFKLVGFSNFVRSNPKSDRFTVKRFHHIEFWCTDATNVARRFSWGLGMQFVAKSDLSTGNLTHASYLLRSRDLNFLFTAPYSPSIAVAQNLSPQSTASIPSFDHSLCRSFAATHGLGVRAIAIEVDDAETAFTTSVTHGALPFCPPTPLGDVATIAEVKLYGDVVLRYVSYTTTINSDHDFLPGFEKIEDTLSYPLDYGLRRLDHAVGNVPELGPAVSYVKSFTGFHEFAEFTAEDVGTSESGLNSVVLANNEEMVLLPMNEPVFGTKRKSQIQTYLEHNEGAGVQHLALVSEDIFKTLREMRKRSFVGGFEFMPSPPPTYYKKLKQRAGDILSDEQIKECEELGILVDRDDQGTLLQIFTKPVGDRQVFLCTNHFIFFASYNYG	79.95	0	gi|449453770|ref|XP_004144629.1|	PREDICTED: 4-hydroxyphenylpyruvate dioxygenase-like [Cucumis sativus]	RSp1400_2
3603	CotAD_47875	73586.9	0.316	3|-|2	5|-|6	2.23	-	0.001|-|0.001	CotAD_47875	MAANGNGVSTTPKSPLARIQTQKNGGICHDDSGKPVKAQTIDELHSLQRKRSAPTTPLDGVQGAFATISEDERQRQQLQSISASLASLTRGTGPKVVRGDPAGKVQSVSHVAHHHHIEAPTISVSDSSLKFTHVLYNLSPAELYEQSIKYEKGSFITSTGALATLSGAKTGRSPRDKRVVIDDTTQDELWWGKGSPNIEMDEHTFMVNRERAVDYLNSLDKVFVNDQFLNWDPQNRIKVRIVSARAYHSLFMHNMSKPIPDKCIRPTPEELENFGTPDFTIYNAGQFPCNRYTHYMTSSTSIDLNLARREMVILGTQYAGEMKKGLFCVMHYLMPMRQILSLHSGCNMGKDGDVALFFGLSGTGKTTLSTDHNRYLIGDDEHCWSDNGVSNIEGGCYAK…	86.88	0	gi|470103779|ref|XP_004288307.1|	PREDICTED: phosphoenolpyruvate carboxykinase [ATP]-like [Fragaria vesca subsp. vesca]	PA5192
3607	CotAD_28676	42107.6	0.176	4|5|4	11|18|9	1.79	0.014	0.001|0.001|0.020	CotAD_28676	MQQAANSAIKAIANSGSSSLLTRQLHASPGSKKIVGVFYKANEYFTKNPNFVGCVEGALGLRQWLESQGHQYIVTDDKEGPDCELEKHIPDLHVLISTPFHPAYVTAERIKKAKNLQLLLTAGIGSDHVDLKAAAEAGLTVAEVTGSNVVSVAEDELMRILILVRNFVPGYHQVITGDWNVAGIAYRAYDLEGKTVGTIGAGRIGKLLLQRLKPFNCNLLYHDRVKIDPELEKQTGAKFEEDLDAMLPKCDIIVINMPLTEKTRGMFDKDRIAKMKKGVLIVNNARGAIMDTQAVADACSSGHIAGYSGDVWYPQPAPKDHPWRYMPNQAMTPHISGTTIDAQLRYAAGVKDMLDRYFKGEDFPEQNYIVKAGELAPQYR	91.11	0	gi|147810156|emb|CAN71454.1|	hypothetical protein VITISV_036417 [Vitis vinifera]	PAE1038
3608	Cotton_D_gene_10010293	11523.9	0.383	-|3|-	-|16|-	1.61	-	-|0.001|-	Cotton_D_gene_10010293	MALQKAKDIVSTNPVVVFSKSYCPFCVDVKQLLQQLGASFKAIELDKESDGSDIQAALAEWTGQRTVPNVFIGGKHIGGCDSTMALHKEGKLVPLLTEAGAITKSSV	80.19	7e-61	gi|156891145|gb|ABU96710.1|	glutaredoxin [Solanum tuberosum]	YDL010w
3611	CotAD_28303	54341.8	0.155	1|3|6	3|6|7	1.85	0.184	0.001|0.003|0.082	CotAD_28303	MEPLCPNFDLLKSSSVPLFSHRLSSINRGISKRSSASFPCVSSYNRNCNPQASVKTEAPTQQQPTGHDLIKSLTKGFVGFAAAATALASVCSDSPAFAESLTVAFPVSRAQEVNTVQRTLVEAWGLIRETFVDPTFNHQDWDLKLQQTMVEMFPLKSADAAYGKIRGMLSTLGDPFTRIISPKEYQSFRIGSDGNLQGIGLFITVEPKTGHLVVLSCVEGSPAARAGQRLDGVDSEAAAQRLRGKAGTSVTVKLHRGNGSGSGSSIKEVKLPRELIRLSPISSTVIPHRTPDGRLTKTGYVKLSTFSQTAATEMKNTIHEMENLGVQSYILDLRNNPGGLVKVGLDVAKIWLDGNETLVNTVDRDGYMSPINMANGHALTHDPLVVLVNEGSASASEIL…	71.83	0	gi|462399175|gb|EMJ04843.1|	hypothetical protein PRUPE_ppa004244mg [Prunus persica]	PA5134
3626	CotAD_00437	66932.9	0.207	1|4|5	8|55|63	1.87	0.027	0.001|0.001|0.001	CotAD_00437	MDNSQYKVLKAFSNTSIELMVGVRNADLSTFQSQSYVDSWLRNSFLPYYPSTNITHITVGVEMVDSLDDATNLVVPAMRNVVSALKTANLQDRIKVSTPLSSAVLSPPYPPSEGAMVNASITFYSDILQTQAIIVIQYENKYFCRGSKVGVDYGMDADNLPSPDQVAQLVRNHNIQYLRIYNYRPEVLKAFSNTGIELMVGVPNADLSQFQSQPYVDSWLRTSILPYYPATKITHITVGVEVTNYPDNTANLVVPAMRNVVSALKSANLQGKIKVSTPLSFGVLSKSFPPSEGAFNSGYENVLRLLLDFLEENQSPFMVNLYPIYAIGDSSLDAVLFKSPSTIFVDQNTGLSYKNIFDAQLDAVFYAIANLNFRTTRNAFDAQPDTVHFTLANTNSRIN…	57.32	2e-173	gi|255546283|ref|XP_002514201.1|	Glucan endo-1,3-beta-glucosidase precursor, putative [Ricinus communis]	-
3636	CotAD_12984	24280.3	0.312	1|-|1	2|-|3	2.3	-	0.012|-|0.001	CotAD_12984	MAAIKVHGSPLSTATQRVLACLYEKGTDFQFVPINMAAGEHKSENYLSLNPFGQVPAFEDGDLKLFESRAVTHYIAHEYSDKGTQLLIPGSNKDMAVLQLWKEVEAHQFDSPCSKIAWEAFYKPLMGMVTDSAVVEENEGKLAKVLDVYEARLTRSKYLASDCFTLADLHHLPTIQYLLATPSKKLIDSRPHVCAWVKEITARPAWSKVLAMQKQ	70.23	2e-111	gi|255582148|ref|XP_002531868.1|	glutathione-s-transferase theta, gst, putative [Ricinus communis]	RSc0607
3640	CotAD_24980	22564.6	0.231	2|2|3	5|3|8	1.3	0.044	0.726|0.153|0.012	CotAD_24980	MAMLGASPIRFSSFPPSSSYLTSTFKPTSSSTLSLVVVGKSIIYRRCVACSAVQESSTPTATAETKGTTPPSAGVAGGEEEVKAAPKAAAAKPKPAAKAPAKSLPELMSEDVIPSLKTILEAQDDISEIELTFQDNKLEGSFLKEGCPYSFWAFFPDGGLTGPKGFSLSSYGSGASTVEPFLVDEKKITARHVVFWVEKRLAAQGIIPVWKE	81.65	3e-61	gi|356560577|ref|XP_003548567.1|	PREDICTED: uncharacterized protein LOC100799633 [Glycine max]	-
3642	CotAD_43103	15935.4	0.294	2|2|-	3|7|-	1.41	-	0.392|0.002|-	CotAD_43103	MEAARTVKDVSPHEFVKAYAAHLKRSGKIELPPWTDIVKGGKLKELPPYDSDWYYIRAASMARKIYLRGGLGVGAFRRIYGGAKRNGSRPCHFCKSSGSIARHILQQLQNVNIIDLDTKGGRKITSNGQRDLDQVAGRITVAP	86.01	4e-90	gi|224077760|ref|XP_002305397.1|	predicted protein [Populus trichocarpa]	ECU11g1620i
3662	Cotton_D_gene_10010853	40375.9	0.071	1|2|1	3|4|1	2.55	0.109	0.001|0.008|0.124	Cotton_D_gene_10010853	MKFQVLVIAIWVLVCFGSVSARFFPNITDIPSWIKNNATSKAPWDAFNKFAGCRPGEKREGLSQLKQYFNHFGYIPNSPSNFSEDFDDELEKALKTYQQNFNLNVTGQLDDQTLQQIVRPRCGNADVINGTSSMNSGRSSSFHTTGHLHTTAHFSFFPGTPRWPSNRQDLSYSFLPANGLTDEVKAVFTSAFQKWSTVTPLTFTQVDSYSSADITIGFYTGDHGDGEPFDGVLGTLAHAFSPTSGRLHLDGDENWVVSGDVTKASVSTAVDLESVAVHEIGHLLGLGHSSVEDAIMYPSITSRTRKVELADDDIQGIQLLYGTNPNYNGSTTSNTQERESSGGVPRYLGPRWGLALFLAVGFGSLFL	64.85	2e-169	gi|255558368|ref|XP_002520211.1|	Metalloendoproteinase 1 precursor, putative [Ricinus communis]	-
3670	Cotton_D_gene_10031864	82004.9	0.089	4|5|-	5|11|-	1.34	-	0.248|0.001|-	Cotton_D_gene_10031864	MGFVIGSSCYLQTPISNCQLLFSSSSSSQSIFFNLRNAESKRRSRSFRPPMASLSHQDPNDHVSRKRRAVLLVGISILPFLQLRANAVEGSTLKNVTESELNKPEENQKAEEARGGSPSNPFLSFLNGLGIFGVSVLGPLYALLQKEKKETDQALESIKIKLKEKEAAIVSMEKDFESKLLNEREERTKQLKEAKEEKLSIMDQLNSANNTIAGLGQELKNEKRLIENLKVQIDSLQSNLLKAGEEKRSLEQELKEKLDLVGVLQEKVNLLSSELKDKEGNIQKLSSSIDEKESELKNVNTAYEKTKEELRKANSEIEGLKEELQRNQSELESKNAAVDELNARISSLTVEKDNSRQEFGALQEDYNNLKVSSENKVAADAKLLGEREKEIHLLKDQLE…	61.26	0	gi|224058829|ref|XP_002299637.1|	predicted protein [Populus trichocarpa]	-
3690	Cotton_D_gene_10035846	49144.8	0.141	-|-|1	-|-|1	1.25	-	-|-|0.001	Cotton_D_gene_10035846	MWQMFGGIVATGKNVSAPSSGVLPSGVPMGDDAPNEGFGDSDEHSNKNESIPPDEVPSNPSHEIPNRRKQTLWAVHDKGKKSIGSSLIAQSSTANIHLPLLFLITPPVSRGGYARNGLTISKSYYDILQVPKGASDEQIKRAYRKLALKYHPDKNPGNEEANKRFADINNAYEVLSDSEKRGIYDRYGEEGLKQHAASGGRGGMGVNIQDIFSSFFGGGSVEEEERIVKGDDVIVELDATLEDLYMGGTLKVWREKNILKPAPGKRRCNCRNEVYHKQIGPGMFQQMTEQVCEQCQNVKYEREGYFVTVDIEKGMQDGQEVVFYEDGEPIIDGEPGDLKFRIHTAPHDRFRREGNDLHATVTITLVQALVGFDKTIKHLDDHLVEIGSKGITKPKEVRK…	86.3	0	gi|225437515|ref|XP_002275221.1|	PREDICTED: dnaJ homolog subfamily B member 11 [Vitis vinifera]	TM0849
3696	Cotton_D_gene_10035760	40046.7	0.112	2|4|4	7|5|8	1.4	0.011	0.002|0.074|0.012	Cotton_D_gene_10035760	MKKMATPLLFFATFLLLLATVHPKVIAVGQPSEVKLNSRILQDSIVKRVNENPKAGWKAALNPRFSNYTVGEFKHILGVKPTPKKELLGIPIIRHGKSLKMPANFDARTAWPQCSTIGRILDQGHCGSCWAFGAVESLSDRFCIHFGMNISLSVNDLLACCGFLCGSGCDGGVPISAWRYFVRSGVVSEECDPYFDDIGCSHPGCEPAYPTPMCEKKCVKGNQLWSQSKHYSVGAYRINSDPTDIMAEVYKNGPVEVAFTVYEDFAHYKSGVYKHVTGSVMGGHAVKLIGWGTSDDGEDYWLLANQWNKGWGEDGYFKIRRGTNECGIEDDVVAGLPSTKNLVREVADMDNLKAASF	80.78	0	gi|224064400|ref|XP_002301457.1|	predicted protein [Populus trichocarpa]	AF1946_2
3701	CotAD_22598	32664.3	0.574	8|9|12	150|138|208	1.39	0.005	0.001|0.001|0.001	CotAD_22598	MIYIITGASISNAYPIFAQQGYENPREATGRIVCANCHLANKPVDIEVPQAVLPDTVFEAVVRIPYDMQLKQVLANGKKGALNVGAVLILPEGFELAPPDRISPEMKEKIGNLSFQNYRPTKKNILVIGPVPGKKYSEITFPILSPDPASNKDAHFLKYPIYVGGNRGRGQIYPDGNKSNNTVYNATATGIVSKIIRKEKGGYEITITDALDGHQVVDIIPPGPELLVSEGESIKLDQPLTINPNVGGFGQGDAEIVLQDPLRVQGLLFFLASIVFAQIFLVLKKKQFEKVQVSEMNF	99.66	0	gi|119368512|ref|YP_913200.1|	cytochrome f [Gossypium barbadense]	-
3705	Cotton_D_gene_10003918	48115.7	0.617	9|7|2	34|15|6	1.17	0.003	0.001|0.085|0.032	Cotton_D_gene_10003918	MAATIVSIKARQIFDSRGNPTVEVDVETSNGKKARAAVPSGASTGIYEALELRDGGSDYLGKGVSKAVANVNTIIGPALIGKDPTQQTAIDNFMVQQLDGTQNEWGWCKQKLGANAILAVSLAVCKAGAEVLNIPLYKHIANLAGNKKLVLPVPAFNVINGGSHAGNKLAMQEFMILPTGASSFKEAMKMGVEVYHNLKSVIKKKYGQDATNVGDEGGFAPNIQENKEGLELLKTAIAKAGYTGKVVIGMDVAASEFYGSADKTYDLNFKEEKNDGSQKISGDALKDLYKSFVSEYPIESIEDPFDQDDWEHYSKLTNEIGTKVQIVGDDLLVTNPKRVEKAIKEKTCNALLLKVNQIGSVTESIEAVKMSKKAGWGVMASHRSGETEDTFIADLSVGL…	94.17	0	gi|158144895|gb|ABW21688.1|	enolase [Gossypium hirsutum]	all3538
3709	Cotton_D_gene_10015258	39426.6	0.128	4|3|4	19|14|10	1.22	0.001	0.001|0.001|0.206	Cotton_D_gene_10015258	MASPPAVKAAYWPSWTTFPPSAIDTILFTHIYYAFLMPTDTYKFEISTSTALELSNFTTTLRRKNPPVKTLYSIGGGGTDSHLFARMVSNEKSRQTFINSAIETARGLGFDGMDLDWEFPENPTDMKNLGVLFMDWRRAINYEARKTHRAPLLLTAAVYFSVDFFLDEVYRKFPVWSINQNLDWINAMCYDYHGSWDTSATGAHAALYDPNSNISTSYGLRSWIKAGLFRSKLVMGLPLYGKTWVLKDPNSNEIGSAAISVGPGDVGVLTNVEIEEFNKKNGAKIEHDMETVSTYSYAGSVWIGYDDSVSATLKVGFAQALGIRGYFFWAIGYDSEWKISRYASRAWVVGE	68.95	8e-180	gi|224142433|ref|XP_002324562.1|	predicted protein [Populus trichocarpa]	BS_yvbX
3714	Cotton_D_gene_10016246	25661.3	0.083	1|1|1	10|13|10	1.45	0.044	0.001|0.001|0.005	Cotton_D_gene_10016246	MALRSLATRKTLTLALKSTRLAQSRALQTFSLPDLPYDYGALEPSISGEIMQLHHQKHHQTYITNYNKALEQLHDAIQKGDSSTVVKLQSAIKFNGGGHINHSIFWKNLAPISEGGGEPPHGSLGWAIDTNFGSLESLIQKMNAEGAALQGSGWVWLGLDKELKKLVVETTTNQDPLVTNGPNLVPLLGIDVWEHAYYLQYKNVRPDYLKNVWKVINWKYASEVYEKESA	91.3	2e-141	gi|74229681|gb|ABA00455.1|	MnSOD [Gossypium hirsutum]	YPO4061
3734	Cotton_D_gene_10029624	27498.8	0.178	4|3|2	10|9|11	1.15	0.004	0.001|0.248|0.435	Cotton_D_gene_10029624	MAASLTRISYSSAFTFSASKTSVFSPSVFASSIKVPTFSSLTVKPLCSTFAPHAAHAISFTTHATSTPASVLDTSTKTFHGLCYVVGDNIDTDQIIPAEYLTLVPSNPAEYEKLGSYALIGLPSSYATRFIEPNETKTKYSIVIGGANFGCGSSREHAPVALGAAGAKAVVAESYARIFFRNSVATGEVYPLESEARICEECKTGDVVTIELGESRLINHSTGKEYKLKSIGDAGPVIEAGGIFAYARKTGMIPSQSN	91.11	2e-108	gi|255579643|ref|XP_002530662.1|	3-isopropylmalate dehydratase, putative [Ricinus communis]	PAB0288
3750	CotAD_02046	61777.8	0.37	4|4|3	10|11|8	1.44	0	0.001|0.010|0.001	CotAD_02046	MHRIVLQREIRSRASHKALSWFSSSNLFRSVHSLPFATVEAEGISGSQPAEVQNLVQGKWTGSAAWNTLVDPLNGEPFIKVAEVDGNGIQPFVESLSKCPKHGLHNPFKSPERYLLYGDISAKAAHMLALPKVSDFFTRLIQRVSPKSYQQAFGEVYVTQKFLENFSGDQVRFLARSFAVPGNHIGQQSHGYRWPYGPVAIITPFNFPLEIPVLQLMGALYMGNKPVLKVDSKVSIVMEQMMRLLHYCGLPAEDVDFINSDGKTMNKLLMEANPRMTLFTGSSRIAEKLAVDLKGRVKLEDAGFDWKILGPDVEEVDYVAWVCDQDAYACSGQKCSAQSILFMHENWSTSSLISKIKDLAERRKLADLTVGPVLTVTTEAMLEHKKKLLQISGSKLLFG…	85.38	0	gi|462405594|gb|EMJ11058.1|	hypothetical protein PRUPE_ppa003713mg [Prunus persica]	SMc02181_2
3758	Cotton_D_gene_10003313	52917.6	0.156	5|4|5	16|17|26	1.5	0.004	0.002|0.001|0.001	Cotton_D_gene_10003313	MEKPATEVIKGDGWGRFPDDLEYHSGFGNHFESEAIAGSLPRGQNSPLICPFGLYAEQISGTSFTSPRKLSQRSWFYRIKPSVTHEPFWPREPSHKKLVSEFDGSNTVANPTQLRWKPVDIPDSPTDFIDGLYTICGAGSSFLRHGFAIHMYTANKSMDNCAFCNADGDFLVVPQQGRLWITTECGRLQVSPGEIVVLPQGFRFVVDLPDGPSRGYVAEVFGTHFQLPDLGPIGANGLAASRDFLAPTAWFEDCPRPGFTIIQKFGGELFNARQDFSPFNVVAWHGNYVPYKYDLSKFCPYNTVLIDHGDPSINTVLTAPTDKPGVALLDFVIFPPRWLVAEHTFRPPYYHRNCMSEFMGLIYGGYEAKADGFLPGGASLHSCMTPHGPDTKTYEATVA…	84.67	0	gi|8131905|gb|AAF73132.1|AF149017_1	homogentisate 1,2-dioxygenase [Solanum lycopersicum]	SMc03208
3759	CotAD_03602	52339.8	0.311	2|2|2	6|6|8	1.65	0.01	0.001|0.001|0.001	CotAD_03602	MEVNAIWLLLLLPCSFPGFLISSCMGNQIDYLNRLVASRRSSNPPRPESWAQLDDQGNSHSSPVFVGSQKGLMQADKIDKLPGQPEGVDFDQYAGYVTVDPVADRALFYYFVESPVTSPNKPLVLWLNGGPGCSSLGYGAMQELGPFRVNSDGKTLYRNEYAWNNVANVIFLESPAGVGFSYSKNSSDYTQVGDKRTAEDSHVFLLNWLERFPQYKTRDLFITGESYAGHYVPQLASYILSRNKNTNQSVINLKGIAIGNAWIDDNICTKGRFDYLWTHALNSDETNEGVNKYCNFASQDLVTNKAVAKNATDQCDQYQSRALTEMGDIDLYGIYSPLCNSSAIKPGSDGNGLNFDPCSDVHVKSYLNLAKVQAALHAKATKWSACSGDTDGLVPVTSS…	66.1	0	gi|225458529|ref|XP_002282331.1|	PREDICTED: serine carboxypeptidase II-3-like [Vitis vinifera]	XF1282
3763	Cotton_D_gene_10031845	15266.2	0.153	2|2|1	65|34|14	1.22	0.037	0.001|0.041|0.001	Cotton_D_gene_10031845	MASLATLAGVQPTTIKGLGGSSLNGTKLLVKSTRQSFKPKNYRAGAVVAKYGDKSIYFDLEDIGNTTGQWDLYGSDAPSPYNPLQSKFFETFAAPFTKRGLLLKFLILGGGSLGLYLSATASDDLLPIKKGPQLPPKPGPRGKI	83.87	2e-57	gi|462411279|gb|EMJ16328.1|	hypothetical protein PRUPE_ppa013021mg [Prunus persica]	-
3767	CotAD_04776	39913.7	0.316	6|3|5	26|13|19	1.32	0	0.001|0.001|0.002	CotAD_04776	MKPVFTIMSALLLAVIATVNSCPPSDRAALLAFKAALHEPYLGIFDSWTGTDCCHNWYGVSCDTESHRVADINLRGESEDPIFERAHRTGYMTGFISPEICKLTRLSSITIADWKGITGEIPKCISTLSFLRILDLVGNKISGEIPYDIGKLNRLTVLNIADNQISGRIPASLTSLSSLMHLDLRNNKISGPIPRRFGRLGMLSRALLSGNQISGLIPGSISRIYRLADLDLSMNKISGSIPASLGKMAVLATLNLDCNKISGTIPPTLLTSSIGNLNLSRNGLAGKIPDVFGPRSYFTVIDLSYNKLSGSIPRTLTAASYIGHLDVSYNHLCGRIPAGAPFDRLEASSFSHNHCLCGKPLRAC	75.55	0	gi|470118172|ref|XP_004295208.1|	PREDICTED: DNA-damage-repair/toleration protein DRT100-like [Fragaria vesca subsp. vesca]	SPBC887.09c
3770	CotAD_36340	62460.8	0.212	-|7|-	-|15|-	1.21	-	-|0.008|-	CotAD_36340	MANSKKPGGLREMLESMYSVIALLFILVACVELCDAAAAFDVYRLIQYDMSGSPFGSRFAALNHHAASLHFPPGVDLSRTVLIIPLRELNITFVREYINQKKPLGGLLVLLPEVLSFKTGGNNQVHEKEKMKNLLAELERLLIHSNIPYPVYFAFENDEIDTALADIKKNDLMGQPATATTGGYKFVIPTAEPKKVASPTMTNIQGWLSGLKTDGDANQLPTIAIVASYDTFGAAPALSVGSDSNGSGIVALLEISRLFSLLYSNPKTRGRYNLLFGLTSGGPYNYNGTQKWLRSFDQRLRESIDYAICLNSIGSWDNELWIHVSKPPENAYIKQIFEGLSNVAEELDLKVGLKHKKINISNPRVAWEHEQFSRLRVTAATLSELSVTPELLESTGGLF…	82.53	0	gi|462400643|gb|EMJ06200.1|	hypothetical protein PRUPE_ppa003566mg [Prunus persica]	-
3773	CotAD_65686	41318.4	0.253	3|1|3	4|2|12	2.59	0.302	0.112|0.181|0.001	CotAD_65686	MSVFLFMLLVSILNPVVSHKSCDFPAVFNLGDSNSDTGGYASAFTPPTSPYGDTYFHMPARRFSDGRLIIDFIAEAFGLPFINAYLDSVGTNFSHGINFATSASTIRLPISVIPNGGFSPFYLGLQYSQFEQFKVRSQVIRKQGGLLASLMPKEEYFSKALYTFDIGQNDLGEGFFSNLTVQEVNASIPDIINKFSANIKNIYNLGARFFWVHNTGPIGCLPYVLVAFASTEKDPAGCLKPYNEVAQYFNLKLKESIAQLRNEFPSAAFTYVDIYSVKYSLFAEPQKHGFELPLVTCCGYGGEYNYSAAVLCGGTITVNGTEIFVGSCDNPSVRVVWDGIHYTEAANKFIFDQISTGSFSDPAVPLKHACQS	71.27	0	gi|224084882|ref|XP_002307434.1|	predicted protein [Populus trichocarpa]	all3634
3775	Cotton_D_gene_10018385	40317.7	0.19	6|5|-	15|12|-	1.26	-	0.022|0.001|-	Cotton_D_gene_10018385	MATNTSSLKKKSEQVLDGSDIMELVENQEVFTSFVDHKFKELDKDSDGHLSVKELQPAVADIGAALGLPAQGSSPDSDHIYSEVLNEFTQGKQEKVSKTEFKEVLSDILLGMAAGLKRDPIVILRIDGEDLLEFINGPSYEVEMLSVFSQIVSDDAVLPMRDCIVKALEKLTVDQGMPPSPDSWVTSNIIEPALQLWDGNNQEKLVSQETFLEEFKKVAERVAQNLKEQPVIVAHSENTFDGSGIKRLLSNKFELDKLLNTALENVPKDRNGKVSKEYLRVVLDVVAPSASLPPIGAVEQIDKVVAEAFDMINADDGKAVKEDEFKKLLTEILGSVMLQLEGNPISISSNSVVHEPLASSSSLLQPSS	77.93	0	gi|255586847|ref|XP_002534034.1|	calcium ion binding protein, putative [Ricinus communis]	-
3776	CotAD_72918	28968.1	0.392	2|3|3	11|8|9	1.9	0.013	0.001|0.002|0.003	CotAD_72918	MEGSSSEKLIIVTREPDGIATVTINRPKSLNSLTRPMMVDLAKAFKALAKDNSVRVIILSGAGRAFCSGVDLTAAQDVFKGDVKDPETDPVVQMEQCPKPIIGAINGLAITAGFEIALACDMLVAAKGAAFVDTHARFGIFPSWGLSQKLARFIGPNKAREVSLAAMPLSAEEAEKLGVVNYVVDQNEVLNKARQLAGAIMKNSQDLVLRYKSVINDGYKLDLREGLAMEKERGHKYYDGMTPEQFKKMQEFIARRGSKKPSSKL	79.15	3e-144	gi|462420141|gb|EMJ24404.1|	hypothetical protein PRUPE_ppa010027mg [Prunus persica]	AF0435
3779	CotAD_59975	41988.9	0.267	6|6|6	62|43|69	1.67	0.017	0.001|0.001|0.001	CotAD_59975	MKTVFTIFSVLVFTVISPANGCPPSDRAALLAFKAALHEPYLGIFNSWTGTDCCHNWYGVSCDPQSHRVADINLRGESEDPIFERAHRTGFMTGFISPEICKLTRLSSLTIADWKGITGEIPKCITSLPFLRILDLIGNKLSGEIPADIGRGXXXXXXXXXXXPADIGRLKRLTVLNVADNQLSGRIPSSFTSLSNLMHLDLRNNKISGPIPGKAGDLSMLSRALLSGNMISGPIPVSICRIYRLADLDLSINKMSGVIPPCLGKMAVLATLNLDCNMLMGTIPTTLLTSAIGNLNLSRNALEGNIPDVFGLTSYFTVIDLSHNKLRGPIPRSLSAASYIGHLDLSYNHLCGRIPAGAPFDHLEASSFMYNDCLCGKPLRAC	70.68	0	gi|470118172|ref|XP_004295208.1|	PREDICTED: DNA-damage-repair/toleration protein DRT100-like [Fragaria vesca subsp. vesca]	YJL005w_1
3789	CotAD_27627	24842.4	0.848	9|9|10	600|483|587	1.26	0	0.001|0.001|0.001	CotAD_27627	MKPNQQVVCKAQKQEDDGSLVSRRLALTVLIGAAAVGSKVSPADAAYGEAANVFGKPKTDTEFMPYNGDGFKLSIPSKWNPSKEVEFPGQVLRYEDNFDTTSNLSVMITPTDKKSITDYGSPEEFLSSVDYLLGKQAYFGKTDSEGGFDSGAVATANILESSSSTVGGKPYYFLSVLTRTADGDEGGKHQLITATVNNGKLYICKAQAGDKRWFKGARKFVESAASSFSVA	85.65	1e-139	gi|462411977|gb|EMJ17026.1|	hypothetical protein PRUPE_ppa010093mg [Prunus persica]	-
3794	CotAD_18440	27520.1	0.266	4|4|3	7|9|16	1.44	0.017	0.154|0.019|0.001	CotAD_18440	MASSLLVLATIFVLCSFGKASHPGLILTVVNNCPFTIYPAIQPNAGHPVLERGGFALHTLTHRSFPAPTVHWSGRIWARTGCTYSNGHFSCATGDCGHRIECNGLGGATPVTIAQFSLHHGGHKDLSSYEVSLVDGFNIPMTVTPHEGKGLCPVVGCRANILATCPGKLQYRSPPHGPVVGCKSGCAAFGTDELCCRNHYNSPQTCRASSYSEFFKHACPATFTYAHDSPSLMHDCSSPRELKVIFCH	81.38	8e-147	gi|255581099|ref|XP_002531364.1|	Zeamatin precursor, putative [Ricinus communis]	-
3805	CotAD_04090	45295.3	0.152	2|4|5	8|4|10	1.4	0.012	0.042|0.013|0.001	CotAD_04090	MCPFNFQEGSPKGSLPTLHLNPYSWSKVSNIIYLDSPAGVGFSYSWNISEYITGDHKTATDTHAFLLKWFGLYPEFVSNPFYIAGESYAGIYVPTLSSEVVKGIKVGAKPTINFKGYMVGNGVCDPVFDGNALVPFTHGMALISDDIFQGVESSCGKNYSNPSKICDENIEKVYKAISDLNIYDILEPCYHDPTSQLSSKGNKSLPVSFQQLGATSKPLPVRTRIFGRAWPFRAPVKDGIVPLWPELAQTNSRDVPCFNDEVATLWLNDAKVRQAIHAQPENVSGTWELCTDRISYYHDAGSMILYHKTLTLQGYRALIYSGDHDMCVPYTGTQAWTRSLGYKTIIPWRSWMSNGQVSGYLQGYDHDITFLTIKGAGHTVPEYKPMEALDFYSRWLDHK…	71.57	0	gi|449442665|ref|XP_004139101.1|	PREDICTED: serine carboxypeptidase 1-like [Cucumis sativus]	SPAC1296.03c
3806	Cotton_D_gene_10029451	30538.8	0.309	5|7|7	20|21|24	1.39	0	0.001|0.002|0.001	Cotton_D_gene_10029451	MTPLHFFLLLLLSSAALISAAAATTAYPSIPGTDSTTDCGLSGGDENPVPIRREVYGNGKIFDISHRYTVDMPSWESKDGVGQFLWLPKSMKNGSLANNSEMKLPTHTGTHLDAPGHVIDRYFDAGFDVDTLDLEVLNGPALLIDVPRDKNITAEVMESLKIPKGVRRVLFRTLNTDRRLMFKKEFDTSYVGFMKDGAEWLVKHTDIKFIGIDYLSVAAFDDLIPSHIVFLEGRDIILVEGLKLDDVQPGIYSVHCLPLRLLGAEGSPTRCILIK	82.61	8e-153	gi|462396709|gb|EMJ02508.1|	hypothetical protein PRUPE_ppa009953mg [Prunus persica]	AGl227
3819	Cotton_D_gene_10014917	57045.6	0.032	1|1|1	8|3|4	1.39	0.019	0.005|0.161|0.155	Cotton_D_gene_10014917	MEKKCYVVVLVAFFLIVSCMVAPSHGKKQTEALGHLYEIKMKGSHVLNKSPFKAIHHINKSRIHGQEEMKEKDRIPKLPGQPHVRFSQYGGYVTVDKKAGRALYYYFVEAQQSKESLPLLLWLNGGPGCSSLAYGAMEEIGPFRVHSDGKTLYRNRYSWNHAANVLFLESPAGVGFSYSNTTSDYDRSGDSKTVVDNYVFLINWLERFPEYKERDFYISGESYAGHYVPQLAHTILLHNKKANTTLINLKGIIIGNAVINDETDVKGMYDFFKSHALISDETAYRISKYCNLESENNMDAESSTECNAATDEVNRDTYNIDIYNIYAPLCHDSSLTVQPKEPSVVNFDPCSDNYVYAYLNRADVQEAIHANVTKLDHGWEPCSNIITTWGDSPSTVIPL…	72.94	0	gi|224055081|ref|XP_002298413.1|	predicted protein [Populus trichocarpa]	XF1282
3838	CotAD_26979	32883.6	0.099	1|-|-	2|-|-	2.07	-	0.027|-|-	CotAD_26979	MASLRLFLCFFLFTASSVNIVCSRSLQKDHIALFIFGDSVYDPGNNNYIDTTARANYYPYGETFFKYPTGRFSDGRLTSDFIAEYANLPLIPPYLQPGNHEFTAGVNFASAGAGALSETNQGFVIDLKTQLSYFKKVAKQLRQELGDAEAMAFLSKAVYLINVGSNDYVLPFTTNSTVFQYFSKQQYVGMVIGNLTETIKEIHKEGGRKFGFRNFGSMGCIPLLKALVPGNTTGSCFEQANELAKLHNAAFTKALEEMEIKLVQFKYSMHHLNIYLSELTKNPRRFGMHPAI	59.58	2e-116	gi|224074087|ref|XP_002304246.1|	predicted protein [Populus trichocarpa]	all3634
3847	CotAD_17449	29288.3	0.125	3|1|1	9|4|9	1.76	0.024	0.001|0.101|0.007	CotAD_17449	MAFTSILRKTANSLAPLAIRLTRVQRNYHSCIFTALNHGFQPQQPTVNRFYPNTLHFSTAVDSQKSASDESLLRVIESEIQCAEESDEYDQAEGTPSEFPFKIEDTPGLQTITLTREYDGELVKVNVHMPDLVTGEGEADDDNDDDTEKPSKSNVPLVVNVSKKDGPSLEFNCTAYPDEITIDSLSVRNPNSEDELAYEGPDFYDLDENLQKAFHKYLEIRGIKPSTTNYLHEYMINKDGREYILWLKNLKKFIEE	63.81	1e-109	gi|225449374|ref|XP_002282374.1|	PREDICTED: uncharacterized protein At2g39795, mitochondrial [Vitis vinifera]	-
3849	Cotton_D_gene_10014707	55434.1	0.226	3|2|3	27|16|25	1.48	0.009	0.001|0.001|0.001	Cotton_D_gene_10014707	MADNFLYFCLFCSLVVLTQSAPEEALVTQLPGFSGTFPSKHYSGYVNVDQNHGKNMFYYFVESERNPSEDALVLWLNGGPGCSSFDGFVYEHGPFNFEAAKANESLPQLHLNPYSWSKVSNIIYLDSPVGVGFSYSKNKSDYETGDVQTAIDTHAFLLKWFELYSEFLPNPFFIAGESYAGVYVPTLSSEVVKGIVAQKKPIPNFKGYLVGNGVADDEFDGNALVPFAHGMGLISDELYEEVNSECKGNFYIPLSETCESKLEKVEKNIEDLNIYDILEPCYHAPETLENTDIKIRLPSSFRKLGETNRPLAVRTRMFGRAWPLRAPVRDGIVPTWPQLLDAESVPCTDDTVATQWLNDPAVRKAIHAEEETAIGKWELCTDKILYDHDAGSMIVYHKN…	78.31	0	gi|224132038|ref|XP_002321240.1|	predicted protein [Populus trichocarpa]	SPAC1296.03c
3874	Cotton_D_gene_10033441	48096.4	0.221	5|5|5	22|21|33	1.52	0.003	0.001|0.001|0.001	Cotton_D_gene_10033441	MPSLRLLVLFFFLFFPVHSQEDTPIARFLRYLQFNTAHPNPSYADPISFLISQANAIGLHARTLEFTPSKPLLLLTWPGSNPFLPSVLFNSHLDSVPAEPSKWIYPPFSATLAPDGKIYARGAQDDKCIAMQYLEAIRNLKANGFTPSRTVHISYVPDEEIGGFDGSAKFAESKEFEDLNVGFVLDEGQASTGEEFRVFYADRSPWGLIIKATGDPGHGSRLYDNGAMENLMKSVEVITKFRESQFDIVKSGEAMNSEVISVNPVYLKAGIPSPTGFVMNMQPSEAEAGFDLRLPPTADPDLIKKRIAEEWAPARRNMTYELIEKGPIRDYLDRPLMTLTNDSNPWWPVFKQAIEAAGGKLSRPEILASTTDARFMRQRGIPTLGFSPMTNTPILLHDH…	82.27	0	gi|225459515|ref|XP_002285843.1|	PREDICTED: aminoacylase-1 isoform 1 [Vitis vinifera]	CC3239
3880	CotAD_13829	65378.8	0.079	-|4|1	-|9|1	1.21	-	-|0.049|0.940	CotAD_13829	MARLAILLLILIAVDHVNPTTSLPLSTNSRWIVDDQTDRRVKLACVNWPSHLEPVFAEGLSKRSMDSIAEQIVSMGFNCVRLTWPLYLVTNDSLSSLTVRRSFQNLGLMEPIAGIQANNPSVIDVSLIQAFQAVVSSLGKNNVMVILDNHLSKPGWCCGYFDGDGFFGDPYFNPDLWVTGLTRMATLFNGVTNVVGMSLRNELRGPKQNINDWYRYMQKGAEAVHAANPNVLIILSGLSFDKDLSFIKNRPLILTFSRKLVFEMHWYGFSDGQAWVTGNPNRVCGRVTNDIKRMSGFLVDKGYPLFVSEFGVDLRGTNVNDNRYLNCFLGMVAELDLDWALWTLVGSYYLREGVIGFNEYYGILDWNWIDMRNSSFVERISALQSPFRGLGLLETELHK…	70.97	0	gi|255547996|ref|XP_002515055.1|	hydrolase, hydrolyzing O-glycosyl compounds, putative [Ricinus communis]	-
3887	CotAD_54094	33951.8	0.198	4|-|5	20|-|22	1.2	-	0.001|-|0.001	CotAD_54094	MAGKSKVLVIGGTGYIGKFIVEASVKEGHPTFALVREGSVSDPVKGKVINNFKNLGVHLLYGDLYDHESLVKAIKQADVVISAVGSMHLADQVKIIAAIKEAGNVKRFFPSEFGNDVDRVHAVEPAKTAFATKAQIRRAIEAEGIPYTYVSSNCFAGYFLPDLSQPGATTPPRNKVVIPGDGDPKAVFNHESDIGTYTIKAVDDPRTLNKILYIRPPKNTYSFNEIVALWEKLIGKTLEKTYVPEDQLLKQIKEATFPYSVGLAIRHSVFVRGDHTNFEIEPSFGVEASELYPDVKYTTVEEYLSRLV	80.84	0	gi|124488476|gb|ABN12322.1|	phenylcoumaran benzylic ether reductase-like protein [Gossypium hirsutum]	AGc1732
3889	CotAD_58634	103971	0.192	1|1|1	3|3|5	1.38	0.001	0.001|0.001|0.001	CotAD_58634	MFSPASLLSLSSLYVLLVLLSCFYGGVSSVPTKVGKGYRLISAEETSDGGFLGHLQVKQKNNIYGPDIPLLQLYVKHDTGDRLRVHITDAEKQRWEVPYNLLPREQPPALKQTIGRSRKNLLTVSELAGSELIFSFTADPFSFAVKRKSNGQTLFNSSSGGSDSFGEMVFKDQYLEISTQLPKDASLYGLGENTQLHGIKLYPNDPYTLYTTDVSAINLNTDLYGSHPVYMDLRNVGGEPFAHAVLLLNSNGMDVFYKGNSLTYKIIGGVFDFYFFSGPTPLDVVDQYTSFIGRPAPMPYWSLGFHQCRWGYHNLSVVEDVVENYRKAQIPLDVIWNDDDHMDGHKDFTLNPVNYPRSKLLAFLDKIHNRGMKYIVIIDPGIGVNSSYGVYQRGIANDV…	85.78	0	gi|255581663|ref|XP_002531635.1|	alpha-glucosidase, putative [Ricinus communis]	ZyicI
3909	CotAD_74752	37106.7	0.11	3|3|3	8|9|8	1.64	0	0.009|0.002|0.008	CotAD_74752	MDNMESTKLEEIAFDGGPPVLRIYKDGRVERLVGTQIDVPPGIDPKTNVESKDAVYSQETAQYLRLYIPKNSTSSSAQKLPLLVYFHGGAFFTWTASSPMYHTYLNSLVAEANVIAVSVDYRRAPEHPIPIAYHDSWDALKWVASHYGGNGHEKWLNRHVDFNKVYLSGDSAGANIAHHMAIRIGKEKLDGINLAGIMLIHPYFWGKEPVGDETKDPDKRAKIERLWRLVSPTTSGADDPWINPFKDQSLASLASLVCSRVLVCVAEKDVFRHRGWYYCERLKKIGWKGEVEMMESKGEDHVFHLLEPTCDSAMAKLKKVAAFMNQGP	60.99	3e-137	gi|255555511|ref|XP_002518792.1|	catalytic, putative [Ricinus communis]	SPAC1039.03
3929	CotAD_16183	12867.1	0.06	1|-|1	1|-|1	3.7	-	0.113|-|0.044	CotAD_16183	MFVYHLQLVTRLEIHPEVLATIEDGDEGSDNDDQSHCDPNDDFSNPDLDDIPKDINEKGLVEGENANPHSTGNMGPGIVIRNNLGSFRTDVDPDAALARKFPKYTNIVPACNSLIF	-	-	-	-	-
3961	CotAD_00739	93795.1	0.007	1|1|1	6|2|2	1.26	0.012	0.007|0.800|0.626	CotAD_00739	MDMKTPLSLALVFVSVFAVYCFDHALSTTVTYDHRALVIDGKRRVLQSGSIHYPRSTPEVWPELIRKSKEGGLDVIETYVFWNYHEPVRGEYYFEGRFDLVKFVRTVQEAGLMVHLRIGPYACAEWNYGGFPLWLHFIPGIQFRTTNDLFKKEMLRFLAKIVGLMKEEKLFASQGGPIILAQAYGVAGELYVNWAAEAAISLNTTVPWVMCRQEDAPDPIINTCNGFYCDQFTPNSPSKPKMWTENYSGWFKSFGYPIPHRPVEDLAFAVARFFEMGGTFHNYYMYFGGTNFGRTAGGPLVATSYDYDAPIDEYGFIRQPKWGHLCDLHLAIKHCEEYLIRSDPTHQQLGHNLEAHIYYKSSNKCAAFLANYDSELDANVTFNGNLYFLPAWSVSILPD…	76.13	0	gi|255560830|ref|XP_002521428.1|	beta-galactosidase, putative [Ricinus communis]	PAB1349
3963	Cotton_D_gene_10038885	16594.2	0.172	2|1|1	8|5|4	1.22	0.016	0.018|0.615|0.136	Cotton_D_gene_10038885	MAETESTTTAQDSATAETEPHQTQAQSQIDETAAKLNNLTLRIWPPTQRTRDAVINRLVETLSSQSVLSKRYGTIPEDEASSLAKSIEGEAFSVAGAAFSPDDDGIEILQMYSKEISKRMLDTVKSRAATAAAADAPSATEAANGEEVSSSSVKAEA	66.98	8e-42	gi|350535412|ref|NP_001234193.1|	MFP1 attachment factor 1 [Solanum lycopersicum]	-
3969	CotAD_64634	49167.6	0.071	1|1|1	2|4|2	1.83	0.009	0.146|0.014|0.032	CotAD_64634	MKTSMIFSKLVSFALILQLLNPTVVLSSSSSLSSSNGLTEIPKKFLDFAKRKEVVDWMVGIRRKIHENPELGYEEFETSKLIRLELDKLGIPYKYPVSVTGIVGFVGTGEPPFVAIRADMDALPIQETVDWEHKSKNPGKMHACGHDAHVSMVLGAAKILKQHLQELKGTVVLVFQPAEEGGGGAKKMLDAGVLDNVDAIFGLHVLHSAPIGTVACKPGPVLAGSGLFDAVISGKGGHAAIPQHSIDPILAASNVVVSLQHLVSREADPLDSQVVTVAKFQGGGAFNVIPDSVRIGGTFRAFSKASLIQLKKRIEEVIKGQAAVQRCSATVDFSNTKKPMLLFPPTVNDKDLHEHFLKVAGDMLGNDKVKDMKPVMGSEDFAFYQEAFPGYFFFIGMQD…	74.83	0	gi|449458197|ref|XP_004146834.1|	PREDICTED: IAA-amino acid hydrolase ILR1-like 4-like [Cucumis sativus]	AGc4953
3977	CotAD_01427	11257.5	0.147	1|1|1	8|4|5	1.57	0.015	0.001|0.049|0.066	CotAD_01427	MPIATGHEREELAAELEGKKIIEDVNNPVGPFGTKEAPAVVKSYYDKRIVGCPGGEGEDEHDVVWFWLEKGKLHGCPVCSQYFVLEVVGPGGPLDGHGDDRH	87.5	9e-51	gi|388512435|gb|AFK44279.1|	unknown [Lotus japonicus]	-
3986	CotAD_05429	46263.3	0.292	9|7|5	57|49|29	1.4	0.001	0.001|0.001|0.001	CotAD_05429	MAAYSLLSTLSSPFSRSPNRTPKLPPLSLTSTSKPSFLFPTRKLSLPSLHSLIFNQSKNSSNKNSSNNCIVSSAFDSFFILCTSLALSFSLFVTDVGAASAFVVTPPRKLQSDELATVRLFQENTPSVVYITNLAVRQDAFTLDVLEVPQGSGSGFVWDTDGHIVTNYHVIRGASDLKVTFADQTTYDAKVVGFDQDKDVAVLRVDAPKDKLRPIPIGVSADLLVGQKVYAIGNPFGLDHTLTTGVISGLRREISSAATGRPIQDVIQTDAAINPGNSGGPLLDSSGNLIGINTAIYSPSGANSGVGFSIPVDTVSGIVDQLVKFGKVTRPILGIKFAPDQSVEQLGVSGVLVLDAPANGPAGKAGLRPTKRDAYGRLVLGDIITSVNGKKVTNGSDLY…	80.5	0	gi|359493091|ref|XP_002267510.2|	PREDICTED: protease Do-like 1, chloroplastic-like [Vitis vinifera]	TM0571
3987	CotAD_04115	35298.8	0.339	4|4|2	13|14|12	2.5	0.07	0.001|0.001|0.001	CotAD_04115	MASFHMITTLLFLLTIMLGASNAQLSATFYAKTCPNVSTIVSNVLQQAQGNDIWIFPKIVRLHFHDCFVHGCDASLLLNGTDGEKTATPNLSTEGYEVIDDIKTALEKACPRVVSCADVLALAAQISVSLGGGPKWQVPLGRRDSLTAHREGTGSIPTGHESLANIATLFKSVGLDSTDLVALSGVHTFGRARCAAFMDRLYNFNNITGKTDPTLNATYANTLKQRCPKGGDTKSLIDLDEQSSLTFDNKYFSNLQNRRGLLQTDQELFSTNGAETVAIVNRFASSQSQFFSSFAKAMIKMGNLNPLTGTNGEIRLDCKKVN	100	0	gi|34419961|gb|AAQ67366.1|	POD9 precursor [Gossypium hirsutum]	-
3991	CotAD_29741	38237.2	0.099	1|1|1	3|1|2	2.1	0.056	0.257|0.319|0.016	CotAD_29741	MEFSRAQMVPAVFVFGDSLVDVGNNNYLPVSIAKADFPHNGIDFPTKKPTGRFSNGKNAADLLAEKLGLPSSPPYLSLLKKTDESSYINGVSFASGGAGIFNGTDQTYGQSIPLLKQVDNYIVVYKSLVQQMGPSGAEKHLSKALFTIVIGSNDMLDYFGSSDLRKKSAPQQFVDLMANTLKGQLKRLYETGARKFVLTGIGVIGCIPAERVKNKTHKCNEECNFWSVKYNEELKAMLKGLKSERQGINYSYFDTYSIMQNVIQKPSSYGFNEIESACCGLGDLKAKVPCVPISKYCSNRKDHVFWDLYHPTEATARIFVDTLFDGPSQYCIPMNVRQLVSA	68.71	2e-169	gi|224116598|ref|XP_002317343.1|	predicted protein [Populus trichocarpa]	VCA0218
3998	Cotton_D_gene_10019962	39296.8	0.289	7|6|5	39|21|23	1.36	0.002	0.001|0.001|0.001	Cotton_D_gene_10019962	MAKVTNFFVALLLISSLLLAPYLSISEAADNSVPIVSGLSWTFYKTSCTKLESIIRTQLKKVFDNDIGQAAGLLRLHFHDCFVQGCDGSVLLDGSASGPGEQQAPPNLSLRAKAFEIINDLRNRVEKACGRVVSCSDIVALAARDSVYLSGGPDYGIPLGRRDGLTFATVNATLQNLPPPFANATTILSMLATKNFDPTDVVALSGGHTVGISHCTSFTTRLYPTQDPTMDKTFANNLKVICPTVNSTNTTVMDIRSPNKFDNKYYVDLMNRQGLFTSDQDLYTDSRTRGIVTSFAINETLFFEKFVVSMIKMGQLSVLTGNNGEIRANCSVRNADNKSYLASVVEELPVEEAWSDL	79.82	0	gi|218138216|gb|ACK57683.1|	peroxidase 4 [Litchi chinensis]	-
4001	Cotton_D_gene_10028222	48447.2	0.068	2|3|-	3|5|-	2.57	-	0.003|0.102|-	Cotton_D_gene_10028222	MEIMILSFIGQAVKSEWQLSSGQESLLSTIVFAGMLLGANTWGLLSDNYGRRQKGFLTISMVTFGAGLLSTFSPNYLTLVLLRGLVGFGLGGSSVFLSWFLEFIPASNRGMWMVVFSTFWTFGSIFEATLAWIVMPRLNWRWVLAFSAVPSFALLILYGVAPESPRYLCMKGNTSDALRILEKIASVNQTKLPPGVLVSGRSNDKDEESAPSENTAPLLPSLSKSTTQSKSGFSSFFMLFSSKLIRTTLLLWVLFFGDSFSYYGIILLTSKLSSGQSTCFPSLQSNINPQDDGLYLNAFITSMAELPGLLLSAILVDRVGRKHSMAIMFGLAFIFLTPLLIQQPAVLTTCLLFGARMNAMGTFTVASIYSPELYPTSVRTTGAGVASAIGRIGGMVCPL…	99.32	0	gi|383932368|gb|AFH57281.1|	MFS [Gossypium hirsutum]	HI1104
4003	Cotton_D_gene_10034126	12149	0.259	2|2|2	12|6|5	1.39	0.034	0.005|0.134|0.016	Cotton_D_gene_10034126	MGVEKQVIRPGTGPKPTPGQTVTVHCTGYGKNGDLSEKFWSTKDPGQQPFSFQIGKGSVIKGWDEGVMGMQVAEVARLRCSPDYAYGAGGFPAWGIQPNSVLEFEIEVLSLK	87.16	1e-59	gi|73919361|sp|O04287.1|FKB12_VICFA	RecName: Full=Peptidyl-prolyl cis-trans isomerase FKBP12; Short=PPIase FKBP12; AltName: Full=12 kDa FK506-binding protein; Short=12 kDa FKBP; AltName: Full=FK506-binding protein 12; Short=VfFKBP12; AltName: Full=FKBP-12; AltName: Full=Immunophilin FKBP12; AltName: Full=Rotamase	SPAC27F1.06c
4022	Cotton_D_gene_10003728	43987.6	0.136	1|1|1	3|2|1	2.35	0.366	0.172|0.002|0.077	Cotton_D_gene_10003728	MKTTTASVFLLFIIFSVTPSSFLFGVANATNEPVLDTDGNEVQTGTEYYVVSAIWGAGGGGLALGWPSENPCPEVVAQSRSGDDGIPVIFSNLDSNDGVVRLSSDINIEFIPLRPRLCPTTTVWKVDDYDHSAGKWWVITDGVTGNPGANTLTSWFRIEKAGDLDYTFKYCPAVRGTCPALCNKITRDSDGEMIRLAPSSFLFGVANATNEPVLDTDGNEVQTGTEYYVVSAIWGAGGGGLALGWPSENPCPEVVAQSRSGDDGIPVIFSNLDSNDGVVRLSSDINIEFIPLRPRLCPTTTVWKVDDYDHSAGKWWVITDGVTGNPGANTLTSWFRIEKGGALGYKLKYCPAVCGTCPALCNEIERGFDGEMVRLALSTGNGWPFIFKKVGKSAMEIQQ…	61.32	1e-80	gi|55139090|gb|AAV41233.1|	putative 21 kDa trypsin inhibitor [Theobroma bicolor]	-
4024	CotAD_21911	27096	0.328	6|4|6	22|20|26	1.58	0.002	0.001|0.001|0.001	CotAD_21911	MSCSRIASFVYLLTLASLLQTAFGLFHNCSDTGSFSAGDPYEANLNQVIEYLSSQTPSSGFGRHAIGQNPNRVFGLALCRGDVSSEDCKTCVVRAGNEIRQQCPYKKGAITWYDYCLVKYSNIRFFGQIDNQNKFNVWNPNKASEAFSRQSEGLLSLLANEASADPSSFYANGEILVRGSAKIYGMTQCTRDLSISDCKKCLDGLIDEFPKCCNRLEGGRVFSGSCYFRFENFPFLKA	56.79	3e-92	gi|224093230|ref|XP_002309844.1|	predicted protein [Populus trichocarpa]	-
4034	CotAD_48129	20371.3	0.239	2|3|4	7|11|15	1.12	0.011	0.024|0.512|0.549	CotAD_48129	MESTLSTLPSALTPFSFSKPLNPKSTLFSFSQSPLLGPVAVLSYSFPLRTISSIPKRLHRRLECVSSGTGGGFGGNDGSSGGGGGGGGEGTGGGDSKAKLGAGVVDDLSALSPDVIILNVGGMMCGGGASSVKKILESQPQVSSATVDLKTATAMVWPVSEAKAVPNWQKELGEALAKQLTSSGFESELRGEEAIGDVSPQ	65	2e-40	gi|296086811|emb|CBI32960.3|	unnamed protein product [Vitis vinifera]	-
4041	CotAD_21458	34270.1	0.063	1|1|1	3|2|10	1.31	0.018	0.626|0.539|0.019	CotAD_21458	MLGCSIVASASLKVGFYTQTCPSAETIVRKAVNKAVSLNPGIAAGLIRMYFHDCFVRGCDASVLLRSVPGNPPAEMDHPANNPSLRGFEVIDEAKAQIEAQCPGTVSCADIIAFAARDSTYKAGGIYYAIPAGRRDGRVSIIDEVTQNLPPPSFNAQQIAQLFARKGMSVDEMVTLSGAHSIGVSHCSSFSNRLYSFNATHAQDPSLDPNYAAFLKTKCPPPTSAAGAGGDPTTVPLDSVTPNRLDNKYYTELRGRRGLLTSDQTLMDSSLTSALVLNNVKHGAAWAKKFGKAMVHMGSVDVITGAQGEIRRICSVPN	74.6	5e-167	gi|255579232|ref|XP_002530462.1|	Cationic peroxidase 1 precursor, putative [Ricinus communis]	-
4056	CotAD_62118	40419.6	0.114	1|3|1	4|10|1	1.17	0.038	0.966|0.003|0.863	CotAD_62118	MATQSLSRYLLSKPKSLTSFLFPSCRPFSSFSPAAAASPVKTLITSSPSPSLSFLRRLRAPLCYSLLLRDSLSPTIKSFSTRAARSSLNDPNPNYSNRPPKETILLDGCDFEHWLVVVEPPKEDATRDEIIDSYIKTLAQVVGSEEEARMKIYSVSTRHYYAFGALVSEELSYKIKELPGVRWVLPDSYLDVKNKDYGGEPFINGQAVPYDPKYHEEWVRNNARANERNRRNDRPRNYDRSRNYERRRENMQPPPNQGMQNAAPNTAGNPPPNNMGGMPYNNRGGMPANNMGGGMPPPNNRMPPPNNMGGMPPGPPNQGWSGNMGGNAQNFQNPYQGNTQNVQYPNNYPPNMGGHGGNYQS	86.26	8e-92	gi|449522498|ref|XP_004168263.1|	PREDICTED: uncharacterized protein At3g15000, mitochondrial-like, partial [Cucumis sativus]	-
4066	Cotton_D_gene_10018128	68617	0.067	3|2|-	4|2|-	1.75	-	0.005|0.182|-	Cotton_D_gene_10018128	MELKPGLSALITGGASGIGKALSLALAGKGLFVTIVDFAEEKGKEVACLVEKENSRFHEKLEFPSAIFVKCDVTNPRDISLAFEKHVATYGGLDVCINSAGINNPVPFQNDQSDGAKTWRHTINVNLVAVIDCTRLAIKTMQALQKPGVIINTGSYAGLFPFFLDPIYSGSKGGVVLFTRSLTPYKREGIRVNVLCPEVVRTEMGEKLDPKYVSLMGGFVPMELVVKGAFELITDESRAGSCLWISNRRGMVYWPIPSEEAKYSLRSSTSSRSNKISFQAPLSSQLPQNFKKLVVHTWSQNFRDATHIISAPLRLPLESNQVLLKVIYAGVNAGDVNFSAGRYFQGTKKDPGFEAVGIIAAIGDSVRNLEVGTPAAVMTIGCYAEFMKVPSKQILPIPR…	73.04	0	gi|462396595|gb|EMJ02394.1|	hypothetical protein PRUPE_ppa002752mg [Prunus persica]	mll0505
4069	CotAD_18083	85651.3	0.153	10|5|5	18|11|16	1.22	0.001	0.001|0.040|0.001	CotAD_18083	MGSKKGRTMVEVGADGVAVITIINPPVNSLSLDVLQSLKESFDEALQRDDVKAIVVAGANGKFSGGFDISAFGGIQQGAVQQPKSGYVSVEVLTDTIEAARKPSVAAIDGLALGGGLEVAMVCHARISTPTAQLGLPELQLGLIPGFGGTQRLPRLVGLAKSLEMMLTSKPVKGEEALGLGLVDAVVSSHELVNAARQWALDILARRNPWVATLYKTDKIEPLGEARQILNFARAQTRKRAPNLKHPLVCIDVIEEGIVNGPKPALYKEVEAFQGLLKSDTSKSLIHIFFAQRGTSKVPGITDRGLVPRKVKKVAILGGGLMGSGIATALLLSNYTVILKEVNEKFLEAGIGRVKANLGSRVKKGQMTREKFEKTMSLLRGVLDFESFRDVDMVIEAVI…	82.65	0	gi|224107106|ref|XP_002314377.1|	predicted protein [Populus trichocarpa]	CC0076_2
4071	CotAD_63777	56737.4	0.091	2|3|2	3|3|4	1.28	0.052	0.050|0.964|0.056	CotAD_63777	MLVSSTMHLLSMCVLSLVLSCCQGRVDPNFRIRAVNLGGWLVTEGWIKPSLFDGIVNKDFLDGTALQFKSVTTGKYLSAEQGGGSIIVANRTTASGWETFRLWRINETAFNFRVFGKQFIGVDTDGNGIGIVAISKAPGHSETFEILRNSDDKNRVRIKAPNGYYLQAKTEEVVTADSQGSKGWGDDDPSVFVMKMTGRLEGEFQVTNGYGPENAPQVMREHWRTFIVEKDFKFISQNGLNAVRIPVGWWIASDPTPPPPFVGGSLQALDNAFQWAKKYGLKVIIDLHAAPGSQNGWEHSGSRDSSQEWGKTDETITQTVAVIDFLASRYAKSPSLYAVELINEPLSPGATLSSVIEYYKAGYAAVRRHTSTAFVVMSNRLGPMKPRELFPMASGFKRS…	78.57	0	gi|462424116|gb|EMJ28379.1|	hypothetical protein PRUPE_ppa019648mg, partial [Prunus persica]	TM1752
4091	CotAD_10040	29264.8	0.249	5|6|-	11|10|-	1.08	-	0.025|0.364|-	CotAD_10040	MSGQSQRLNVVPTVTMLGIMKARLVGATRGHALLKKKSDALTVQFRQILKKIVSTKESMGEIIKTSSFSLTEAKYVAGENIKHVVLESVQTASLKVRSRQENVAGVKLPKFEYFTEGETKNDLTGLARGGQQVQQCRAAYVKAIEVLVELASLQTSFLTLDEAIKTTNRRVNALENVVKPRLENTISYIKGELDELEREDFFRLKKIQGYKKREIEKQLAAAKEFVEDKFAEKISLQKGISINAAHNLLSAAREKDEDIIF	91.57	3e-176	gi|225446740|ref|XP_002282632.1|	PREDICTED: V-type proton ATPase subunit D isoform 1 [Vitis vinifera]	APE0402
4095	CotAD_68292	33599	0.163	1|-|1	2|-|6	1.32	-	0.992|-|0.006	CotAD_68292	MKWVKVIVSFILTLSFLSFPSCAFQSDELLVDDEEFGLEGAPQHRSPEPIPTRSPPVTSPTRKRHSDLDSDSKIQFSLDHAFGDSDFSPAGTFSARLKTWSHGGQTLTKLRFSRNSFSDVEKEKFKNLLESDDFYRIRLPSNVLNPPGRDFIISSVKARCLPRESLDEHFVIHMEGVNVLAVNYGSPGSCPYPRNLKLPAKWSFSSHTVLKNSEQAPRAPVFTEEILGGENAEGEVVQPAERSFWAKYWMYLIPLGLIVMNAITQAMNMPEEQATGQVPAQGQPSAGAVRRGPSSAVRRR	71.43	1e-148	gi|462401254|gb|EMJ06811.1|	hypothetical protein PRUPE_ppa009085mg [Prunus persica]	-
4110	CotAD_59544	35115.4	0.312	8|6|5	36|25|26	1.43	0.003	0.001|0.001|0.001	CotAD_59544	MLQNLKFLQSTPQLLQPPTSAAPLPQLHSTCFPILKQFKISRRELTICSNSSLLLLLGSQALKSKAKAEESSPSDNQQEEENVATPNPNCGNKVPTKRAFLDIAIDGEPVGRIVIGLYGDDVPVGAARFGSIVSGAAGISYRRKEFVKIMPNYVQHGGLRSYGVDAELAKRSGSNLAVENLREEWEREYEKCPGVKNSAGTVSILVRDPSKPPPKLKLVARKGKLEIDEEEIGTEPNGTEFVISIMDSPELDASALVIGQVLNGMEVVKRIGQVKTVQENTASPYFRVAKLIGDKRAVVAERGFNRPYAKVVINNCGLMD	64.37	2e-133	gi|356563117|ref|XP_003549812.1|	PREDICTED: peptidyl-prolyl cis-trans isomerase B-like [Glycine max]	SPBC28F2.03
4112	CotAD_42992	35274.9	0.952	3|3|2	42|20|25	1.5	0.003	0.001|0.001|0.001	CotAD_42992	MSVSLQAAATLMQPIKVAAPSRTNVLLRSSQSVSKAFGLEPVGARLTCSLQTDLKDLAQTCVDATKLAGFALATSALVVSGASAEGVPKRLTYDEIQSKTYMEVKGTGTANQCPTIDGGVDSFAFKPGKYYAKKFCLEPTSFTVKAEGVNKNAPPEFQNTKLMTRLTYTLDEIEGPFEVSTDGTVKFEEKDGIDYAAVTVQLPGGERVPFLFTIKQLVASGKPDSFGGDFLVPSYRGSSFLDPKGRGGSTGYDNAVALPAGGRGDEEELAKENNKSAASSSGKITLSVTKSKPETGEVIGVFESLQPSDTDLGAKTPKDVKITGVWYAQLDS	88.82	0	gi|224094610|ref|XP_002310188.1|	hypothetical protein POPTRDRAFT_813989 [Populus trichocarpa]	-
4118	CotAD_51876	56560.5	0.142	5|4|5	23|15|16	2.23	0.112	0.001|0.001|0.001	CotAD_51876	METVTLTGLLHKAAAEFPTRRALSVSGKFDLTHAQLQHIIDHAASLLIASGIHPGDVVALTFPNTVELVIMFLAVIRCRATAAPLNSAYTAEEFEFYLSDSESKLLLIPAEGIKPAEAAASKLNIPLVSAALQDENSKITLSSNPESNIDSVKQLVNDPADVSLFLHTSGTTSRPKGVPLTQLNLGTSVLNIKSVYELTESDSTVIVLPLFHVHGLLAGLLSSLVSGAAVTLPAAGRFSASTFWTDMIKYKATWYTAVPTIHQIILDRHESNPERPRYPKLRFIRSCSASLAPSILERLEAAFDAPVLEAYAMTEASHLMTSNPLLNNGPHKAGSVGKPVGQEMAILNEQGEIQPPYSNGEVCIRGLNVTKGYKNNPEANKSAFQFGWFHTGDVGFFDS…	80.11	0	gi|255537431|ref|XP_002509782.1|	AMP dependent CoA ligase, putative [Ricinus communis]	PA3300
4125	CotAD_50886	54450.1	0.3	7|6|7	28|20|30	1.24	0.002	0.001|0.001|0.001	CotAD_50886	MYRTAASRLRALKGRTSRIAPARFASSSTVATTSSSSGGLLSWLTGSQSKSVPSLDFPLPGVALPPSLPDYVEPGKTKITTLPNGLKVASETSASPAASIGLYVDCGSIYESPASFGVSHLLERMAFKSTTNRSHLRIVREVEAIGGNVNAAVSREQIGYTFDALKTYVPEMVELLIDSVRNPAYLDWEVNEQLQKVKEEIAEAAKNPHGLLLEAIHSAGYSGALANPLLAPESAVNMLNSTVLEDFVAEIFTASRMVLAATGVEHEELLSVAEPLLSDLPNIPRAQEPKSVYTGGDYRCQADSGGQTHFALAFELPGGWHNEKEAIILTVLQILMGGGGSFSAGGPGKGMYSRLYLRVLNQYPQVQSFSAFNSIYNHTGLFGIQATTGSDFVPSAIDV…	79.68	0	gi|225445041|ref|XP_002283310.1|	PREDICTED: mitochondrial-processing peptidase subunit alpha [Vitis vinifera]	alr5125
4129	Cotton_D_gene_10018224	29656.5	0.18	1|1|1	8|5|7	1.65	0.008	0.001|0.001|0.001	Cotton_D_gene_10018224	MASVSLTLLSPLFSNSSKSSLKLGISNANQTSIQESLNLICIDSKRGVSVSQRRETLIKGLALLPLVVFGGAPISEAREVEVGSYLPPSPTDPSFVVFKASPKDTPALRAGNVQPYQFLIPPTWKQSRVANILSGNYCQPKCAEPWVEVKFEDEKQGKIQVVASPLIRLTNKPNASIEEIGDPEKVIASLGPFVTGNSYDPDELLETSVEKRGQQTYYKYVLETPFAITGSHNLAKATAKGSTVVLFVASANDKQWSTSQKTLKAMLDSFEV	79.91	8e-139	gi|255570482|ref|XP_002526199.1|	Thylakoid lumenal 29.8 kDa protein, chloroplast precursor, putative [Ricinus communis]	-
4135	CotAD_43064	37408.2	0.044	1|-|-	1|-|-	2.02	-	0.002|-|-	CotAD_43064	MWIAATSTSSSTLSFFQIQCSDSNRKRGFGPRKSNQKATSKEEKGFNLQQRKLASKQSGPSPAAAPGLSVQFDGKSNSRSLDIDFEERLKAIRSVNPPEEAAVIDKKLSREQKAILETRLAQFEATLSTSPEDETALEGAAVTLTELGDYARATSLLQELVKVKTSDPEVFRLLGEVKYELKDYDGSAAAYKLSAAVSKDVDFEVLRGYTNALLAAKRPAEAVQFLLSCRERLNMERSTGPDPMAESSKMETEPQNLDRIQVDLLLGKAYSVWGHVSDAIAIYDQLISSNPNDFRGYLAKGIILKENGNVGDAERMFIQARFFAPEKAKALVDRYSRQ	55.13	2e-134	gi|118486611|gb|ABK95143.1|	unknown [Populus trichocarpa]	-
4176	Cotton_D_gene_10024573	53925.4	0.226	1|1|1	4|3|4	1.3	0.024	0.570|0.003|0.032	Cotton_D_gene_10024573	MGQSRFIDFLFVLLTCFTCFSSSFGDQNLDKITELPGQPKNVDFNQYSGYVTVNEEAGRALFYWFIESPLNRRPETRPLILWLNGGPGCSSVAYGAAEEIGPFRIRPDGKTLYSNPYAWNKLANTLFLESPAGVGFSYTNTTSDLYTSGDKRTAEDAYVFLVNWLERFPQYKYRDFYIAGESYAGHYVPQLAQIVYERNKGVQNPVINFKGFMVGNAVTDDYHDFVGTFEYWWTHGLISDSTYRNLQVACDLGSATHPSSECTTALEVAEAEQGNIDPYSIFTQPCADTTSLRRNLRGHYPWMSRAFDPCTERYSKEYFNRPEVQKALHANVTGIPYQWETCSDVVGYNWTDSPLSMLPIYQELIAAGIRIWVYSGDTDAVVPVTATRYSIDALKLPTI…	84.1	0	gi|224100813|ref|XP_002312024.1|	predicted protein [Populus trichocarpa]	SPAC1296.03c
4216	Cotton_D_gene_10015679	84158.8	0.175	10|2|2	114|4|6	2.03	0.272	0.001|0.084|0.087	Cotton_D_gene_10015679	MAKPILFPLLFITTAVFLGFFISSAESRPPFACDPRNGLTRSLKFCRANLPIHVRARDLIGRLTLAEKIRLLVNNAAAVPRLGIQGYEWWSEALHGVSNVGPGTKFGGAFPGATSFPQVITSAASFNESLWEQIGRVVSDEARAMYNGGMAGLTYWSPNVNIFRDPRWGRGQETPGEDPVLAGKYAANYVRGLQSPTGIRLKVAACCKHYTAYDLDNWNGVDRYHFNARVSKQDLADTYDVPFKSCVVEGKVASVMCSYNQVNGKPTCADPDLLKGTIRGQWGLSGYIVSDCDSVGVMYDTQHFTSTPEESAAAAIKAGLDLDCGPFLAIHTDLAVRRGLLAEADVDLALANTITIQMRLGMFDGEPSAQPYGNLGPRDVCTPAHQQLALEAARQGIVL…	81.6	0	gi|255556320|ref|XP_002519194.1|	Periplasmic beta-glucosidase precursor, putative [Ricinus communis]	lin1840
4217	CotAD_40930	9504.51	0.337	2|1|1	4|7|4	1.76	0.027	0.003|0.001|0.004	CotAD_40930	MKLVPVLELAGNAARDNKKNRIIPRHVLLAVRNDEELGKLLAGVTIAHGGVLPNINPVLLPKKNEKAAAKEPKSPSKATKSPKKSPKKA	96.55	5e-31	gi|356558242|ref|XP_003547416.1|	PREDICTED: histone H2A-like isoform 2 [Glycine max]	SPBC11B10.10c
4250	CotAD_68884	17132.8	0.103	1|1|2	2|2|3	3.53	2.552	0.080|0.002|0.103	CotAD_68884	MAAANSLQKVTSQLRVARSTLGSFSRTFSSDALVEVKPGEVGMVSGIPEEHLRRRVVIYSPARTATQQGSGKVGKWKINFVSTQKWENPLMGWTSTGDPYANVGDSALGFDSEEAAKSFAERHGWDYVVKKHQTPVLKPKSYADNFKWKGPAVSEK	79.08	2e-88	gi|449448212|ref|XP_004141860.1|	PREDICTED: NADH dehydrogenase [ubiquinone] iron-sulfur protein 4, mitochondrial-like isoform 1 [Cucumis sativus]	-
4257	CotAD_45362	14779.3	0.425	1|1|1	4|9|9	1.51	0.007	0.004|0.001|0.001	CotAD_45362	MISAQQQGKVSGSKESSGNEGRRAAMLYLAAALFTTAAASSANAGVIDDYLEKSKANKGEKTQELNDKKRLATSGANFARAYTVQFGTCKFPENFTGCQDLAKQKKVPFISDDLALECEGKDKYKCGSNVFWKW	74.63	1e-56	gi|470103386|ref|XP_004288120.1|	PREDICTED: photosystem I reaction center subunit N, chloroplastic-like [Fragaria vesca subsp. vesca]	-
4258	CotAD_24930	33869.8	0.112	2|3|2	2|10|2	1.36	0.001	0.449|0.003|0.402	CotAD_24930	MAFGQTLVSSRNMLFTVVPQNPKPNTKTLAFFPSPTPLNSSSVFAKRQRLPFRTVKCSVDYRDQTHLQVSYPKPSEIPWSKDLCNTVNLIGNVGSPVEIKHLPSGKVLAWTRLAVKKSPTDTTWINLTFWDELANTAYQHVEKGQQIYVCGRLVSDTVESDDGKQQTYYKIVVQQINFVERNSPSMASNDRGFSGMSSNRKVGYNGENNVGSAMELWQAFFANPTEWWDNRKNKRNPRYPDFKHKDTGEALWIEGRNTPHWVRSQLEILDSRMSSLQDEDERMFSSMASDNLLPF	61.74	3e-126	gi|224066309|ref|XP_002302076.1|	predicted protein [Populus trichocarpa]	jhp1166
4267	CotAD_32571	23147.1	0.205	2|2|2	7|6|7	1.4	0.022	0.008|0.001|0.007	CotAD_32571	MAAAKVFACPFVFVALFSMVASDPDLLQDLCVANKAAGIKVNGFPCKDEANVTEADFFFSGLANPGVINNSVGSVATGANVEKIPGLNTLGVSLARIDYAPGGLNPPHTHPRATEIIFVLDGELDVGFITTSNKLVSKSVKKGDVFVFPRGLVHFQKNNGDKSASVIAGFNSQLPGTQSIAATLFTSTPAVPDNVLTKTFQIGTKEVDKIKNKLAPKKT	79.17	3e-125	gi|224068291|ref|XP_002302696.1|	predicted protein [Populus trichocarpa]	sll1358
4268	CotAD_42458	36004.4	0.233	2|2|2	10|10|7	1.19	0	0.016|0.017|0.047	CotAD_42458	MRPILMKGHERPLTFLKYNRDGDLLFSCAKDHTPTVWFADNGERLGTYRGHNGAVWTCDVSRDSMRLITGSADQTVKLWNVQKGTQLYTFNFGSPARSVEFAIGDKLAVITTDPFMELTSAIHVKRIAGDSTEQTEESVLVIKGPQGRINRAVWGPLNRTIISAGEDAVIRIWDSETGKLLKESDKESGHKKTITSLTKAADGSHFLSGSLDKSAKLWDTRTLTLIKTYSTERPVNAVAMSPLLDHVVLGGGQDASAVTTTDHRAGKFEAKFYEKILQEEIGGVKGHFGPINALAFNPDGKSFSSGGEDGYVRLHHFDPDYFNIKI	92.64	0	gi|356497716|ref|XP_003517705.1|	PREDICTED: eukaryotic translation initiation factor 3 subunit I-like [Glycine max]	SPAC12G12.14c
4273	Cotton_D_gene_10008291	38432	0.113	1|1|1	2|4|2	2.53	0.677	0.124|0.002|0.011	Cotton_D_gene_10008291	MATKNPFDLLDDDTEDPSLLIAAVEQQKLEKPKKAPASTPAAAQPAKSAKLPTKPLPPSQAVREAKNELGRGGGRGSGRGRGRGGSGFNRDSRVSDNSNGYSGGYRPSEEGDGKQYERRGGYDGPRGSFRGGRRGGFNNGDSGEGERPRRQYDRHSGTGRGNEFKRDGSGRGNWGSSTDEIAPETEENVTENEKKSTEKQFGEEDAADANKENAANEAEEKEPENKEMTLEEYEKILEEKRKALDALKTEGRKVDVKEFESMQQLSNKKSNDDIFIKLGSEKDKRKDADKEEKAKKSVSINEFLKPAEGERYYGPGRGRGRGRGPRGGYGGNTASNVQAPSIADPGHFPSLGGK	71.06	2e-69	gi|147828051|emb|CAN75176.1|	hypothetical protein VITISV_016687 [Vitis vinifera]	-
4277	Cotton_D_gene_10025543	39263.3	0.291	7|5|6	33|27|32	1.18	0.004	0.001|0.001|0.001	Cotton_D_gene_10025543	MDLDLSPKFPATFVETEDGGYYNWAAADSPVLREAKVAAGKLVLKPRGFALPHYADCSKVGYVLEGKCGVGLTTTASNTKEKMAFIGIKKGDIIPVPCASVSCWYNYGDSDVVIVFLADATNAYVAGEITYFLLTGPLGHLHAFSLESIAKTYQISPQKAQKLTSNQKGLLLIKLNQEQAETIPKPNEELLNIYTQNINGSLPDVEVNNGGNFTTLKPSKFPFLEQVGLNVSRLVLETNATRAPWYASDPQVVYVVKGSGEVQIVGLQGKLVLNTKVETGQLFVVPKLFMVAISADENGLELISIVTSTRAIMGEMGSKNSVFNTSPSILQVSLNVSSELNQQLIEMMETGTIIVTPVNLY	47.24	2e-112	gi|225447983|ref|XP_002269464.1|	PREDICTED: 11S globulin seed storage protein 2 [Vitis vinifera]	-
4288	CotAD_02623	73696.2	0.484	1|-|-	1|-|-	1.2	-	0.001|-|-	CotAD_02623	MAGSWRARGSLVVLAIVLFGCLFAISIAKEEATKLGTVIGIDLGTTYSCVGVYKNGHVEIIANDQGNRITPSWVAFTDSERLIGEAAKNQAAVNAERTIFDVKRLIGRKFDDKEVQKDMKLVPYKIVNKDGKPYIQVKIKDGETKVFSPEEISAMVLTKMKETAEAFLGKKIKDAVVTVPAYFNDAQRQATKDAGVIAGLNVARIINEPTAAAIAYGLDKKGGEKNILVFDLGGGTFDVSILTIDNGVFEVLSTNGDTHLGGEDFDHRVMEYFIKLIKKKHGKDISKDNKALGKLRREAERAKRALSSQHQVRVEIESLFDGIDFSEPLTRARFEELNNDLFRKTMGPVKKAMEDAGLEKRQIDEIVLVGGSTRIPKVQQLLKDYFDGKEPNKGVNPDE…	96.1	0	gi|211906506|gb|ACJ11746.1|	luminal binding protein [Gossypium hirsutum]	SPAC664.11
4295	CotAD_24396	43418.6	0.15	1|1|1	7|8|8	1.78	0.006	0.001|0.001|0.001	CotAD_24396	MARKISYIFLCMNVIPLLAAAASQACSAQSDAKCSQTGEWNGEFFPGIPKIKYEGPYTKNKFAYKWYNAEEVILGKKMKDWLRFSVAFWHTFRGTGVDPFGAPTKFWPWEDGTNSIAMAKRRMRANFEFINKLGVDRWCFHDRDIAPEGKTLQETNSNLDEVVKLAKTLQGNNIRPLWGTAQLFMHPRYMHGAATSSELGVYVYAAAQVKKAMEVTHYLGGENYVFWGGREGYQTLLNIDMEFELDHMAKFLEAAAAYKRKIGFTGTLLIEPKPQEPTKHQYDWDAATTTNFLRKYGLIGDFKLNIECNHATLSGHSCHHDVETARINGLLGNIDANSGDAQTGWDTDQFLTDTREATMIMLSVIKNGYNFVRILQISGKP	80.33	0	gi|224142283|ref|XP_002324488.1|	predicted protein [Populus trichocarpa]	AGl774
4304	Cotton_D_gene_10024670	30285.4	0.064	-|2|2	-|5|7	1.48	-	-|0.062|0.038	Cotton_D_gene_10024670	MVAIYSVSAVSKACCTHERPGTFHMSSSCWPNSRKACVPGLMFGGKNNSSTRRTVVLASSAKTPEATATAKSNVPPESTKKGSLEKKPSRNATFPNGFEALILEVCDETEVAELKMKIGDFEMHLKRNVASTKAPMSNISPTTAPSIPTEPMNEAAAATPPPSPPKPSPEKPSPFKSSAFGQSSKLAALEASGSSNYVLVPSPVVGIFQRGRTIKGKRQPPICKEGDLIKEGQVIGFLNQFGFELPVKSDIAGTVLKILFEDGDAVGYGDPLFAVLPSFHGID	59.64	1e-94	gi|359486366|ref|XP_002278151.2|	PREDICTED: biotin carboxyl carrier protein of acetyl-CoA carboxylase-like [Vitis vinifera]	BH2788
4305	Cotton_D_gene_10014608	47521.3	0.189	1|3|1	6|9|9	1.15	0.007	0.222|0.379|0.001	Cotton_D_gene_10014608	MHRSRSPLLIALSFLFTSFPISNALYGPSSPVVQLTPSNFKSKVLNSNGVVLVEFFAPWCGHCQALTPTWEKAANVLKGVATVAALDADAHKSLAQEYGIRGFPTIKVFAPGKPPVDYQGARDVKPIAEFALKQVKALLKDRLAGKASGGSSEKSEPSASVELNSRNFDELVLKSKELWIVEFFAPWCGHCKRLAPEWKRAANNLKGKVKLGHVDCDSEKSLMSRFNVQGFPTILVFGADKDSPVPYEGARTASAIESFALEQLETNVGPAEVTELTGPDVMEEKCSSAAICFVAFLPDILDSKAEGRNKYLDMLLSVAEKFKRSPYSYVWAAAGKQPDLENRVGVGGYGYPALVALNVKKGAYAPLISAFELEHIIEFVKEAGRGGKGNLPLEGTPEI…	85.16	0	gi|449450884|ref|XP_004143192.1|	PREDICTED: protein disulfide-isomerase like 2-2-like [Cucumis sativus]	RC0002
4322	Cotton_D_gene_10036318	12168.9	0.425	1|-|-	3|-|-	3.39	-	0.003|-|-	Cotton_D_gene_10036318	MASSMSLKLACVAVLCMVVGAPLAQGAVTCGQVTSSLAPCIGYLTGNGAGGVPPGCCGGIKSLNSAAQTTPDRQAACKCIKSAAAGISGINYGIASGLPGKCGVNIPYKISPSTDCNSVK	100	1e-66	gi|133907522|gb|ABO42261.1|	lipid transfer protein 4 precursor [Gossypium hirsutum]	-
4325	Cotton_D_gene_10001184	50743.4	0.062	-|3|2	-|4|2	2.22	-	-|0.008|0.046	Cotton_D_gene_10001184	MASQAFYLLVSIIVLLSAIVVSGSGSVGINYGRVANNLPSPEKVVELLKSQGINKVKLYDTGATVLTALADSGITVVVALPNELLSSTAADQSFADNWVEANITKFYPKTKIEAIAVGNEVFVDPANTTKYLVPAMKNIHASLVKSKLDSAIKISSPIAFSALKTSYPSSAGSFKPELIEPVIKPMLDFLKQTGSYLMVNAYPFFAYTANSDQISLDYALFKENPGVVDSGNGLKYSSLFEAQIDAVFAAMSAIQYDDVKMIVTETGWPSMGDQDEKGASESNAASYNGNLVRKVLTGNGTPLRPQDPLNVYLFALFNENQKPGPTSERNYGLFYPNEQKVYTIPLTKEEVKTGESTPVNTNTSPAPVAGEVSKAKVGQTWCVANEKADEKKLQAALDY…	95.52	0	gi|315419013|gb|ADU15553.1|	GLU [Gossypium hirsutum]	-
4339	Cotton_D_gene_10017837	57812.4	0.215	4|7|3	6|13|11	2.12	0.075	0.105|0.002|0.001	Cotton_D_gene_10017837	MGALPHEDFLQCLSLRSNDSSTISSVIYTRNNPSYSTVLESTIRNLRFNSTNTPKPLVIVTPSRTSHFQATIYCSRKHGLQIRTRSGGHDYEGLSYVAKVPFVVVDLVNFRSVDVDVENRVAWVQAGAILGEVYYRIAEKSRTLSFAGGVFHSIGVGGFISGGGFGLLFRKYGTGGDNVIDAQFIDVNGRILDRKSMGEDLFWAIRGGGGGSFGIVLAWKLKLVPVPATVTVFSVSRTLEQNATQLILRWQEIAHQLPDEMNPDVSMFSVNSTQDGRKTIIASFSSLFLGTIDELLPIMQQRFPELGLSRQDCSEMSWIESILYFNQLQNQPLEILLNRTFRNPVGGQYYKIKSDYVKEPISETALNGLFSRLSDEEASSAIIIFMAYGGIMDRIPEDA…	62.4	0	gi|224056785|ref|XP_002299022.1|	predicted protein [Populus trichocarpa]	Rv1774
4341	CotAD_72054	53887.9	0.54	3|3|4	8|8|14	1.35	0.001	0.001|0.002|0.008	CotAD_72054	MARKMLVDGELNQTNKEGAEYDFDLFVIGAGSGGVRAARFSANYGAKVGICELPFHPISSEVIGGVGGTCVIRGCVPKKILVYGATFGGEIEDARNYGWEVNEKLDFNWKKLLQKKTDEINRLNGIYKRLLSNASVKLLEGEGKIVGPNKVEVTQPDGTKLSYSAKHILIATGSRAHRPPIPGQELAITSDEALSLDDLPKHAVVFGGGYIAVEFASIWRGLGATVDLFYRKELPLRGFDDEMRAVVARNLEGRGIKLHPQTNLTELVKTDNGIKVITDHGGELIADVVLFATGRLPNTKRLNLEAVGVEIDKTGAVKVDEYSRTNIPSIWAVGDVTNRMNLTPVALMEGTCFAKTVFGGESSKPDYRNIPCAVFSIPPLSIVGLSEEEAIEQVNGDVL…	88.1	0	gi|224057577|ref|XP_002299276.1|	glutathione reductase [Populus trichocarpa]	SPBC17A3.07
4366	CotAD_63919	53293.5	0.444	4|4|4	23|12|14	1.87	0.036	0.001|0.001|0.001	CotAD_63919	MVGRILLLVLFMNAAFLIVNAVPETCPADLGGKCGEDSEWEGEFFPGVTKIKYEGPSSKNPLSYKWYNAEEVILGKKMKDWLRFSVAFWHTFRGTGADPFGAPTKSWPWEDGTNSIAMAKRRMRANFEFLNKLGVDRWCFHDRDIAPDGKTLKETNSNLDEVVALAKELQGDKIRPLWGTAQLFMHPRYMHGAATSSELGVYAYAAAQVKKAMEVTHYLGGENYVFWGGREGYQTLLNTDMERELDHMAKFLEAAAAYKKKIGFNGTLLIEPKPQEPTKHQYDWDAATTLNFLHKYGLLGEFKLNIECNHATLSGHSCHHDLETARINGMLGNIDANTGDPQVGWDTDQFLTDVGEATMIMLSVIRNGGLAPGGFNFDAKLRRESTDVEDLFIAHISGM…	85.95	0	gi|297735328|emb|CBI17768.3|	unnamed protein product [Vitis vinifera]	L0230
4367	CotAD_24515	29447	0.183	2|-|3	9|-|10	1.48	-	0.089|-|0.001	CotAD_24515	MSTSSSAVSTQKRLEGKVALITGGAGGIGEATARLFVQHGAKVVIADIQDDLGQAISQELGEENISYVHCDVTLDSDVGNAVDFAVSKHGKLDIMFNNAGISSPDKNIVTSNDERFKRVLDINIFGGYLGSKHAARVMIPAKKGCILFTTSVWSVIGSAGVGHAYVTSKHALVGLAKNLGVELGQYGIRVNCISPHGVATPMVTRPFGNMEKEKVEELIAMGSNLKGVVLEPEDVAQAALYLASDDAKYVSGLNMIIDGGYSTTNPSLSNVIRSLSSEG	68.21	9e-118	gi|224140059|ref|XP_002323404.1|	predicted protein [Populus trichocarpa]	lin0362
4377	CotAD_51769	59054.5	0.176	6|7|7	32|35|34	1.6	0.001	0.001|0.001|0.001	CotAD_51769	MAYTSLLSFSVCLLVLFHGCCAQIDLVTNHHQDPPWGQPQQPQPRHQSQCQLQNLNALQPKHRFRSEAGETEFWDQNEDQFQCAGVAFLRHKIQRKGLLLPSFTSAPMLFYVEQGEGIHGAVFPGCPETYQSQSQQNIQDRPQRDQHQKLRRLKEGDVVALPAGVAHWIFNNGRSQLVLVALVDVGNDANQLDENFRKFFLAGSPQGGVVRGGQSRDRNQRQSRTQRGEREEEESQESGGNNVLSGFRDNLLAQAFGIDTRLARKLQNERDNRGAIVRMEHGFEWPEEGQRRQGREEEGEEEREPKWQRRQESQEEGSEEEEREERGRGRRRSGNGLEETFCSMRLKHRTPASSADVFNPRGGRITTVNSFNLPILQYLQLSAERGVLYNNAIYAPHWN…	100	0	gi|126156|sp|P09800.1|LEGB_GOSHI	RecName: Full=Legumin B; AltName: Full=Beta-globulin B; AltName: Full=LEGB-C134; Contains: RecName: Full=Legumin B acidic chain; Contains: RecName: Full=Legumin B basic chain; Flags: Precursor	-
4378	Cotton_D_gene_10013531	47986.1	0.276	2|1|1	14|7|8	1.17	0.003	0.001|0.105|0.010	Cotton_D_gene_10013531	MAIPKRNPIFLSVIFVSLLAIASAKVFFEERFDEGWESRWVKSDWKKDENMAGEWNYTSGKWNGDPNDKGIQTSEDYRFYAISAEFPEVNNKDKTLVFQFSVKHEQKLDCGGGYMKLLSGDIDQKKFGGETPYSIMFGPDICGYSTKKVHAILTYNGTNHLIKKEVPCETDQLTHVYTFILRPDATYSILVDNVEKQTGSLYTDWDLLPPKKIKDPEAKKPEDWDDKEYIPDPEDKKPEGYDDIPKEIPDPDAKKPEDWDDEEDGEWTPSTIPNPEYKGPWNPKKIKNPNYKGKWKAPMIDNPDFKDDPDLYVFPSLKYVGIELWQVKSGTMFDNILVADDVEYAKKLAEETWGKQKDAEKAAFEEEEKKKEEEESKDEPVDSDAEDDDDDTDDGEGSE…	91.24	0	gi|233955399|gb|ACQ91203.1|	calreticulin [Carica papaya]	-
4383	Cotton_D_gene_10032788	36709.1	0.555	3|2|2	12|4|5	1.28	0.027	0.007|0.653|0.021	Cotton_D_gene_10032788	MAKIKIGINGFGRIGRLVARVALQSNDIELVAVNDPFITTDYMTYMFKYDSVHGQWKHHELKVKDSKTLLFGERPVTVFGIRNPEEIPWGETGADYVVESTGVFTDKDKAAAHLKGGAKKVVISAPSKDAPMFVVGVNEKEYKSDLNIVSNASCTTNCLAPLAKVIHDKFGIVEGLMTTVHSITATQKTVDGPSMKDWRGGRAASFNIIPSSTGAAKAVGKVLPALNGKLTGMAFRVPTVDVSVVDLTVRLEKAASYEDIKAAIKKESETNLKGILGYVDEDLVSTDFVGDSRSSIFDAKAGIALSDKFVKLVAWYDNEWGYSTRVIDLIRHMASVN	93.11	0	gi|211906518|gb|ACJ11752.1|	glyceraldehyde-3-phosphate dehydrogenase C subunit [Gossypium hirsutum]	CT505
4391	Cotton_D_gene_10028826	15957.5	0.643	6|5|5	33|29|30	1.38	0.004	0.001|0.001|0.001	Cotton_D_gene_10028826	MEAARTVKDVSPHDFVKAYAAHLKRSGKIELPSWTDIVKTGKLKELPPYDPDWYYIRAASMARKIYLRGGLGVGAFRRIYGGAKRNGSRPRHFCKSSGSVARHILQQLQNVNIIDIDPKGGRRITSNGQRDLDQVAGRIAVAI	90.21	2e-93	gi|460413795|ref|XP_004252264.1|	PREDICTED: 40S ribosomal protein S19-3-like [Solanum lycopersicum]	ECU11g1620i
4395	CotAD_48368	41900	0.347	2|2|2	16|15|18	1.13	0.014	0.916|0.001|0.001	CotAD_48368	MAEGEDIQPLVCDNGTGMVKAGFAGDDAPRAVFPSIVGRPRHTGVMVGMGQKDAYVGDEAQSKRGILTLKYPIEHGIVSNWDDMEKIWHHTFYNELRVAPEEHPVLLTEAPLNPKANREKMTQIMFETFNAPAMYVAIQAVLSLYASGRTTGIVMDSGDGVSHTVPIYEGYALPHAILRLDLAGRDLTDYLMKILTERGYSFTTTAEREIVRDVKEKLSYIALDYEQELETSKTSSSVEKSYELPDGQVITIGAERFRCPEVLFQPSLIGMEAAGIHETTYNSIMKCDVDIRKDLYGNIVLSGGTTMFPGIADRMSKELSALAPSSMKIKVVAPPERKYSVWIGGSILASLSTFQQMWIAKAEYDESGPAIVHRKCF	97.88	0	gi|460388268|ref|XP_004239790.1|	PREDICTED: actin-58-like [Solanum lycopersicum]	ECU04g1090
4414	CotAD_03476	59814.9	0.14	2|3|3	2|7|4	1.29	0.01	0.496|0.021|0.438	CotAD_03476	METSFSSRPWLLIFITLSTVHAQLPGLWELLVSNAGLASMHTAVTRFNTVVLLDRTNIGPSRKMLPKGHCRYDRHDDVLKKDCYAHSVVFDLQTNEIRPLMILTDTWCSSGQFLPDGTLLQTGGDLDGFKKIRKFEPCEPDRFCDWVELKDVELINGRWYATNQILPDGTVIIVGGRGTNTVEYYPPRKTQNGAVELRFLAEVEDNQMDNLYPYVHLLPNSHLFIFANNKAVMYDHEDNKVIHEYPELFGGPRNYPSAGSSVMLALDGDFKTAVIVICGGAEYGAFIERSTDTPAHGSCGRIIATDPNPVWEMEDMPFGRVMGDMVMLPTGDVLIINGAQSGTQGFEMASNPCLNPVLYRPDQPIGLRFMTLNPGTVPRMYHSTANLLPDGRVLLAGSN…	81.23	0	gi|462404108|gb|EMJ09665.1|	hypothetical protein PRUPE_ppa003992mg [Prunus persica]	-
4421	CotAD_76774	34374.3	0.367	7|5|5	36|43|24	2.86	0.265	0.001|0.001|0.001	CotAD_76774	MGSASSFSKFCLTLLLLVVVLGSTNAQLSTNFYSKSCPKLLSTVKSTVTSAINKEARMGASLLRLFFHDCFVNGCDGSVLLDGEKNAIPNRNSARGFDVVDNIKSAVENVCPGVVSCADILAITARDSVEILGGPKWAVKLGRRDARSASQSAANNGIPPPTSNLNRLTSRFNALGLSTRDLVALSGAHTIGQARCTSFRARIYNESNIDASFAQTRQRNCPRTTGSGDNNLAPLDIQTPTSFDNNYFKNLVSRRGLLHSDQQLFNGGSTDSIVRGYGNSPSSFNSDFVSAMIKMGDISPLTGSRGEIRKNCRRVN	95.65	0	gi|32351452|gb|AAP76387.1|	class III peroxidase [Gossypium hirsutum]	-
4436	Cotton_D_gene_10039421	49279.2	0.016	-|-|1	-|-|1	4.42	-	-|-|0.047	Cotton_D_gene_10039421	MGKRKTQRNNAAMLDSDDDNSSVSSSSTMRSAGMSVSGTEEVELNKDSLLDEAVDNLYEKRGSTREKALASIIEAFNSNLQHEFVEKKFATLLHRCLNSIKKGSSKEISLASHTIGLLALTIGPGDKAREILEESITPVSQAFKSGYESSKIASLLECLAIISFVGGIEPEETEKSMQIMWQLVHPKLGSNVITVKPSAVVITAVVSAWSFLLTTMDRWSLSPKLWLESITYLSSLLDKDDRSVRIAAGEALEVIFEMGSLEKFATEAEGSNNGSVSEGNKSKEGLLHIQGLRAKILNQVRDLSVEAGGKGSAKKDLNYQRSLFKDVLEFLEDGYCPETSMKIGGESLQTSTWSQLIQLNFFRRFLGGGFTKHMQENEFLQDVFGFTPKRNLVGGEHVS…	72.77	0	gi|255538078|ref|XP_002510104.1|	conserved hypothetical protein [Ricinus communis]	-
4437	Cotton_D_gene_10008029	22729.5	0.079	1|1|1	10|11|17	1.66	0.003	0.007|0.003|0.001	Cotton_D_gene_10008029	MDKAKFVMLFLVSLVGATMGEQCGRQAGGALCPNNLCCSQYGWCGNTDDYCSPAKNCQSNCRSGPPPPTGEGATVRSTYHFYNPEQNGWDLMAVSAYCSTWDANKPYSWRSKYGWTAFCGPVGPSFPAACGRCLRVRNTRTGAQEIVRIVDRCSNGGLDLDVGVFNRLDTDGVGHAQGHLTIRYDFVDCGNGFNPLLASVIDS	71.07	1e-101	gi|255580937|ref|XP_002531287.1|	Wound-induced protein WIN2 precursor, putative [Ricinus communis]	-
4441	Cotton_D_gene_10016715	60448.2	0.179	3|2|6	4|3|6	1.47	0.011	0.028|0.068|0.039	Cotton_D_gene_10016715	MAVSSFRSGRLPLFHHPQLPNKAAACTTRSIGGFKKPNGRFSSNPKCGRALFLFAQYSQSSQAQTQQDRFSSRLQSSLENLPKLLEDIVQTSISTGPRGALRLAQGIQAFVGVGGEWLADVSRSTNEPTGIPSQLQLGLLSPLYLRKLFERMGATYIKLGQITFCQFIASAPTLFPPEYVEEFQKCFDRAPAVPFEDIQAILREELGRPIDSIYEYIDPTPIASASIAQVHGARLKGSQDDVVIKVLKPGIKDILVADLNFIYIAARILEFLNPDFSRASLVGIVKDIRESMLEEVDFNKEATNIESFRRYLEAMGLTRQATAPRVYNYCSTRRVLTMERLYGVPLTDLDSISSLVSSPENSLITALNVWFGSLLACETFHADVHAGNLWLLRDGRIGF…	71.93	0	gi|224128035|ref|XP_002329238.1|	predicted protein [Populus trichocarpa]	STM3972
4444	Cotton_D_gene_10039332	12799.3	0.075	1|-|-	1|-|-	6.74	-	0.024|-|-	Cotton_D_gene_10039332	MAGELIRLDNQYISVEQMKMFQWTPYEDPVIRAVIPDEFFKNPNAWHTKVPLISYATVEMHQSDRVLRQFGCRQPIPMAPKVFDDHHKIDLRQLHTDCPRFWSHYI	35.35	2e-11	gi|356570471|ref|XP_003553410.1|	PREDICTED: serine/threonine-protein phosphatase 7 long form homolog [Glycine max]	-
4445	CotAD_48302	36253.8	0.016	-|1|-	-|1|-	5.14	-	-|0.043|-	CotAD_48302	MVVDKLRLWSSEKTGDGRERCFIFHTFSSTGWLPICGFASCDVLRFKKPAGHKDLFYIDDKDVEFKEVLESLLPKAPLIHLLHPTGLRLKAFNQQFQKMLQLKLYFDKIVDITMNKSVSILFKQALLSLATDSGLHPLVPYFACFIADEVAQNLNNCPLMFALMRVARSLLQNEHLHIESYLLEPEIKRHETWCVYRALLRVAGLCMYGRLKMFPSLLAPRTRSVWKSNNKVATRAVSGFSTTVGGSNIGVSSMSRLLSNDNMLLREVGGRVSKTSTVLAQAWKEDTDPGNLLASLFELFGESMLSFTPKPELSFFF	53.59	8e-50	gi|255580776|ref|XP_002531209.1|	transcription initiation factor tfiid, putative [Ricinus communis]	ECU10g1120
4465	Cotton_D_gene_10011461	52328.7	0.03	1|1|-	1|1|-	3.66	-	0.908|0.034|-	Cotton_D_gene_10011461	MSRTREENEEQVDLEGDNEQEETIEEEVEYEEIEEEEEVEVEEEVEEEVEDEDENAELVDVQKGSDGDEELNDSETEEEKKKKHAELLALPPHGSEVYIGGIPHDTSKEDLKRFCESIGEVIEVRIMKAKDLGEGNGYAFVTFRSKELASKAIERLNYSEFKGKKIKCSTSQAKNKLFIGNVPRNWGEEVMRRVVTDVGPGVGCIELLKDPMNPSRNRGFVFIEYYNHACAEYSRQKMLKPTFKLDDNAPTVSWADPRNAESSATTQVKSLYVKNLPRDITQDRLKELFEHHGKITKVVVPPAKAGKEDSRYGFVHFAERSSVMKALKNTEKYEIDGQVLECSLAKPQADQKSSGGSGSQKSTLDSSFPPLGFGLLGGAYGGLGTGFGPAGFGQPLIYG…	76.55	4e-167	gi|462397503|gb|EMJ03171.1|	hypothetical protein PRUPE_ppa004785mg [Prunus persica]	alr2087
4469	Cotton_D_gene_10036768	49897.9	0.013	1|1|-	2|1|-	2.43	-	0.007|0.213|-	Cotton_D_gene_10036768	MGKKGKWLSSLKKVFSPDSQEKKNQKSKQQLLEKQVHLGSSDSGAATLETVSLSPPPPEEVKPIEAESKQTYPVVVASAAASPQAAVEVVQRQLNRDALFAGKSEEEVAAIKIQTTFRARRALHALKGLVRLKSLMEGPVVKRQAASTLRCMQTLSRLQCQVRIRRTRMTEENQALQRQLLQKHAKEIVNLQMGEDWDYSLQSKEQIEASLLSKHEAAMRRERAMAYSFTHQQTWKNASRSMNPLFMDPNNPSWGWSWLERWMAAQPQEGRGTTEKEQNDQSSIRSARSNFGGEISKAYARYQLNLDKQSPKAGQKPNQTSSLLSVSTPKTSASIPARKLKSASPRSSVVGPDDDGRSMVSIQSERNRRHSIAGSSVHDNEGLGSSPLLPSYMVPTEST…	62.35	6e-154	gi|224140165|ref|XP_002323455.1|	predicted protein [Populus trichocarpa]	-
4474	CotAD_52861	29298.8	0.127	-|3|-	-|7|-	1.27	-	-|0.021|-	CotAD_52861	MADAIRLLSSSSSSLIHSLRFSSPSLLTTFHFASNSPLSSLGPTNQNSDKIFSYSSSIGLAPLALTPRKLSLSFKAWGLIPSSLFHYNLLDWQLVSLWHEVYATVEETEQPKWWERNAGPNLIDIHSTKEFISALSEAGDRLVIVEFYGTWCASCRALFPKLCRTAQEHPEIIFLKVNFDENKPMCKSLNVKVLPYFHFYRGADGQLESFSCSLAKFQKIKDAIEMHNTARCSIGPPKGVGDLNLESVCAPKNDKPTGSS	79.33	3e-102	gi|224122566|ref|XP_002330513.1|	predicted protein [Populus trichocarpa]	SSO2232
4476	CotAD_26569	90986	0.098	6|3|4	11|5|7	1.21	0.009	0.034|0.203|0.701	CotAD_26569	MGDPNQMAPKLPVAGKRNVLITSALPYVNNVPHLGNIIGCVLSADVFARYCRLRGYNAIYICGTDEYGTTMETKAVEENCTPQEICDKYHALHKEVYDWFDISFDKFGRTSRPEQTEVCQAIFKKLWENNWLTEKPMQQLFCDTCQRFLADRLVEGTCPDGGCNYNSARGDQCEKCGKLLNPTELKEPRCKACQNTPRIRDTRHLFLELPLLKDKLAEYINKMSVDGSWSQNAINTTQAWLTEGLKARCITRDLKWGVPVPHENFKDKVFYVWFDAPIGYVSITKCYTSDWEKWWKNPENVELFQFMGKDNVPFHTVMFPSTLLGTSENWTLMKSISVTEYLNYEAGKFSKSKGIGVFGNDVKDTKIPVEVWRYYLLTNRPEVSDTLFTWDDLQAKLNN…	80.68	0	gi|462418880|gb|EMJ23143.1|	hypothetical protein PRUPE_ppa001592mg [Prunus persica]	AF1453_1
4478	CotAD_12493	28283.1	0.179	2|2|2	8|3|6	1.73	0.012	0.001|0.275|0.001	CotAD_12493	MKTVFTIFSVLVSTVISTVNGCPPSDRAALLAFKAALHEPYLGIFNSWTGTDCCHNWYGVSCDPQSHRVADINLRDLRNNKISGPVPSKAGNLSMLSRALLSGNMISGPIPVSICRIYRLADLDLSMNKMSGVIPPCLGKMAVLATLNLDCNMLMGTIPTTLLTSAIGNLNLSRNAMEGNIPDVFGLTSYFTVIDLSHNKLRGPIPRSLSAASYIGHLDLSYNHLCGRIPAGAPFDHLEASSFMYNDCLCGKPLRAC	47.28	1e-95	gi|312281525|dbj|BAJ33628.1|	unnamed protein product [Thellungiella halophila]	MA2301_1
4499	CotAD_07486	47148.7	0.097	4|3|3	15|26|18	1.47	0.002	0.001|0.001|0.001	CotAD_07486	MDFTATFLFFALFISSIQAVDPCGSRPQNKDLSVIPIYGRCSPFKPPKPESWVDTVINMASKDPARLKYLSSLVAQKTTAVPIASGQQVLSIGNYVVKVKLGTPGQVIFMVLDTSNNVAWVPCSGCTGCSATTFLPSASSSYGSLDCSLPQCNQVHGLSCPATAAAACFFNQSYGGDSSFSANLAQDSLTLANDVIPNFAFGCINSISGNSIPPQGLLGMGRGPMSLLSQSGSLYKSVFSYCLPSFKSNYFSGSLKLGPAGQPKNIRTTPLLKSPHRPSLYYVNLTGVSVGRVRVPIPPEWLAFNPTTGAGTIIDSGTVVTRFVQPLYEAIRNEFVKHAKGPFSTIGLFDTCFEAKAEVELPSLTLHFEGLSMKLPMENTFLHTSAGSRACLAIAPAPN…	73.44	0	gi|224067042|ref|XP_002302336.1|	predicted protein [Populus trichocarpa]	-
4508	Cotton_D_gene_10002202	34944	0.183	2|1|4	3|1|6	1.05	0.02	0.975|0.947|0.047	Cotton_D_gene_10002202	MNFLIGAFKPACNISITFSDGKSRKQVPMKKENGKTIMVSLFQSKESIAGKVSIEPLQGKKIEHLGVKVELLGQIEMYFDRGNFYDFTSLVRELDVPGDIYERKTYPFEFSTVEMPYETYNGANLRLRYVLKVTVSRNYGGSIVEYQDFMVRNYSPPPSINNSIKMEVGIEDCLHIEFEYNKSKYHLKDVIIGKIYFLLVRIKIKNMDLEIRRRESTGSGANTHVETETLAKFELMDGAPVRGESIPIRLFLSPYELTPTYRNINNKFSVKYYLNLVLVDEEDRRYFKQQEIAIYRQQDS	89.33	0	gi|460383610|ref|XP_004237513.1|	PREDICTED: vacuolar protein sorting-associated protein 26A-like [Solanum lycopersicum]	-
4509	CotAD_69201	34498.4	0.239	1|1|2	1|1|11	1.91	0.034	0.275|0.070|0.001	CotAD_69201	MATNMMRAVQYSKYNGGAADLKHVEVPIPSPKKEEVLIKVEAASINPIDWKIQEGVARPFLPRKFPHIPGTDVAGEIVQVGSGVQSFKVGDKVVAVLGNGGALAEYAVAKAGSTVPRPPEVSAPEGAALPIAGLAAHQSLTQLAGLKLDGTGPQVNVLVTAASGGVGQYAVQLLKLANAHITATCGARNMDLVRSLGADEVLDYKTPDGVALKSPSGRKYDVIIHCAHNIPWSTFSANLTPKGKVVDTTPGFGTLMSVAAKKISCSKKQLIPLFTSPKKENLDFLVNLVRDGKLKPKIDSKHPLSKAEDAWAKSIDGHATGKILVEP	86.96	0	gi|38016531|gb|AAR07601.1|	fiber quinone-oxidoreductase, partial [Gossypium barbadense]	mll1929
4513	Cotton_D_gene_10010370	54211.9	0.128	4|4|6	17|23|29	1.33	0.001	0.004|0.001|0.001	Cotton_D_gene_10010370	MAKLSPCFLLCCFLFIHIPTFTQSRQPSYAEQQETDRVTNLPGQPPVKFRHYAGYVKLRPQDSKALFYWFFEAQDGVSDKPLVLWLNGGPGCSSVAYGAAQELGPFLIRSNGTRLTFNKFSWNKVANILFLEAPVGVGFSYTNNSHDLHKLGDQVTAADSYTFLINWFKRFPNFKSHDFYIAGESYAGHYVPQLAQLIYDKNQGSSPDSYINFKGFMIGNAAINEPTDTLGLFDYAWSHAIISDQLYDQINKECDFKQTNNLTVQCADHMKGFMDAYANIDMYSIYTPVCIKALGTRRTYPKLPVAPRLLSQHGIWHMLPRGYDPCTEGYVEKYFNREDVQSALHANLTKLSYPYTTCSGEIQGWNDSPDSVLPIIQKLLTAGLRIWIYSGDTDGRVPV…	75.11	0	gi|224096538|ref|XP_002310649.1|	predicted protein [Populus trichocarpa]	SPAC1296.03c
4539	Cotton_D_gene_10035222	57286.5	0.382	-|2|1	-|13|10	3.57	-	-|0.002|0.001	Cotton_D_gene_10035222	MMYLYHRPSSAFNSPFWTTNSGAPVWNNNSSLTVGPRGPILLEDYHLVEKLANFDRERIPERVVHARGASAKGFFEVTHDISHLTCADFLRAPGVQTPVIVRFSTVIHERGSPETLRDPRGFAVKFYTREGNFDLVGNNFPVFFIRDGMKFPDMVHALKPNPKSHIQENWRILDFFSHHPESLHMFTFLFDDLGVPQDYRHMEGSGVNTYTLINKAGKAHYVKFHWKPTCGVKCLLEDEAIKVGGANHSHATQDLYDSIAAGNYPEWKLFIQTIDPDHEDKFDFDPLDVTKTWPEDILPLQPVGRLVLNKNIDNFFAENEQLAFCPAIVVPGIYYSDDKLLQTRIFSYSDTQRHRLGPNYLQLPANAPKCAHHNNHHEGFMNFMHRDEEINYFPSRYDP…	98.97	0	gi|211906480|gb|ACJ11733.1|	catalase [Gossypium hirsutum]	ZkatE
4541	CotAD_05433	64492	0.148	5|-|3	7|-|3	1.18	-	0.040|-|0.541	CotAD_05433	MEGVACASFTSSASKSLSFSSLSQSSIITLRQNYHNNTLKSKSPRKLVIRASSGSSSGSVVTLLDYGAGNVRSVRNAIRYLGYEIEDVRTPKDILNADRLIFPGVGAFASAMDVLTKTGMAEALCTYIENDRPFLGICLGLQLLFDSSEENGPVNGLGLIPGVVGRFNSLNGFRVPHIGWNALQIAKDSEILDDIGDRHVYFVHSYRAMPSNDNKEWVSSTCNYSDDFIASIRRGNVHAVQFHPEKSGDVGLSVLRRFLNPKSQGSKKPTQGKASKLAKRVIACLDVRTNDKGDLVVTKGDQYDVREQTKENEVRNLGKPVELAGQYYKDGADEVSFLNITGFRDFPLGDLPMLQVLRHTSENVFVPLTVGGGIRDFTDANGRYYSSLEVASEYFRSGA…	86.61	0	gi|225460917|ref|XP_002279105.1|	PREDICTED: imidazole glycerol phosphate synthase hisHF, chloroplastic [Vitis vinifera]	VNG0862G
4542	Cotton_D_gene_10014221	59949.3	0.673	23|21|20	307|270|337	1.37	0.002	0.001|0.001|0.001	Cotton_D_gene_10014221	MASRRLLSSLLRSTSRRSLSKSPSPTPRLPSPSPTRRPFPCPYFLSRDAEYSTSAAAAASAPSQPPPAKKGGKGKITDEFTGAGAIGQVCQVIGAVVDVRFDEGLPPILTALEVMDHSIRLVLEVAQHLGENMVRTIAMDGTEGLVRGQPVLNTGSPITVPVGRATLGRIINVIGEPIDEKGELKTDHFLPIHREAPAFVEQATEQQILVTGIKVVDLLAPYQRGGKIGLFGGAGVGKTVLIMELINNVAKAHGGFSVFAGVGERTREGNDLYREMIESGVIKLGEKQADSKCALVYGQMNEPPGARARVGLTGLTVAEHFRDAEGQDVLLFIDNIFRFTQANSEVSALLGRIPSAVGYQPTLATDLGGLQERITTTKKGSITSVQAIYVPADDLTDPA…	99.81	0	gi|242129046|gb|ACS83602.1|	ATP synthase beta subunit 1 [Gossypium hirsutum]	jhp1060
4550	CotAD_29434	49121.6	0.329	1|1|1	3|2|1	1.36	0.012	0.047|0.604|0.701	CotAD_29434	MLGALRRKVASGRSSASILGKSLQAIRPGVSASRVSSNAGEEMLSVQLRGIAHVRNFSHLVLPGCSAGLTKTRDAICIIQPEAIMQTSCRAFSSGDGDLVDAVVPFMGESISDGTLATFLKKPGDRVKADEPIAQIETDKYVAKEGETVEPGTRVAVISKSAEGVAAAAPTEKKSEKAASEPSPAXXEDKPKAKVEASAAAAKPKAPSPPPPKRTASEPVLPPKERERRVPMTRLRKRVATRLKDSQNTFAMLTTFNEVDMTNLMKLRSDYKDAFVEKHGVKLGFMSGFVKATVSALQHQPIVNAVIDGDDIIYRDYIDISIAVGTSKGLVVPVVRDADKMNFAEIEKTINNLAKKANDGTISIDEMAGGSFTISNGGVYGSLLSTPIINPPQSAILGM…	70.17	0	gi|460412152|ref|XP_004251466.1|	PREDICTED: dihydrolipoyllysine-residue succinyltransferase component of 2-oxoglutarate dehydrogenase complex 1, mitochondrial-like [Solanum lycopersicum]	BH2205
4578	CotAD_30658	56595.5	0.441	1|1|1	3|3|9	4.25	0.267	0.001|0.001|0.001	CotAD_30658	MAANGFVGDERKVQKNYWIEHSVDLTVEAMMLDSKAADIDKEERPEVLSLLPPYEGKTILELGAGIGRFTGDLAKKAGHVIALDFIENVIKKNETINGHYKNVKFLCADVTSPDLAFTEGSLDLIFSNWLLMYLSDKEVENLAERMLKWLKVGGHIFFRESCFHQSGDCKRKNNPTHYREPRFYTKVFKECQATDDSGNSFELSLVGCKCIGAYVKNKKNQNQICWIFQKVVSDNDKGFQRFLDSVQYKSNSILRYERVFGPGYVSTGGIETTKEFVGKLDLKPGQKVLDVGCGIGGGDIYMAEEFDVHVVGIDLSVNMISFALERATGLKCSVEFEVADCPKKVYPDNSFDVIYSRDTILHIHDKPALFRSFYKWLKPGGKLLISDYCKSSKTPSTEF…	97.89	0	gi|159895667|gb|ABX10444.1|	phosphoethanolamine N-methyltransferase [Gossypium hirsutum]	Z0233
4584	CotAD_46687	74897.4	0.141	7|3|3	10|3|6	1.29	0.012	0.016|0.254|0.115	CotAD_46687	MAAMNLVSAGVRSFNLKAGKGFSISKPKGCKLGPRAALVEAGPRGDGSPVALQVSRGDLAADLQAEARAMARAANASVYSPELLANKYGSRPVQAAKRTLEILVALGSFALQLLVDQRNGTLDRNKRKRAIKLKGIFTRLGPTFVKLGQGLSTRPDLSPPAYLEELAELQDALPTFADADAFSCIETELGMPIESLFSSISPSPIAAASLGQVYKAQLKYSGQTVAVKVQRPGIEEAIGLDFYLIRGLGFFINKYVDIITTDVIALIDEFARRVYQELNYVQEGQNARKFKKLYADKEDILVPDIYWNYTSGKVLTMEWVNGVKLNQQAAIESQGLKVLDLVTTGIQCSLRQLLEYGYFHADPHPGNLLATPEGKLAFLDFGMMSETPEDARSAIVGHV…	79.88	0	gi|462406058|gb|EMJ11522.1|	hypothetical protein PRUPE_ppa002144mg [Prunus persica]	BMEII0234
4601	CotAD_08753	47163.1	0.238	2|3|3	26|40|43	1.94	0.027	0.001|0.001|0.001	CotAD_08753	MASSFLLFLLIFLSVSSFILLSESQKTSKPNRFILQLQKDPKTKLYVTNIYKRTPSQKVPFVVDLNGRLLWVTCEKSYRSSTYHAPRCHSTQCSRAGSHYCHICSTRDGPGCHNNTCGVMSMNPVTGLTAMSELAQDVLSIQSTQGSNPGPMVRVPQLLFTCAPSLLLQRGLPSTVQGVAGLGHSLISLPTQLTSHFSSAGFAPIFALCLAPKGVMFFGDSPYYMLPNVDITRPLSYTPLIISPQGEYYMEVKSIKINDKDVPIDTALLSINKQGVGGTKLSTINPYTILHHSIFKAVTQFFSKELSAIPQVKPVAPFGVCFKSKSIKNSRVGLEVPNIDLVLHDKHVMWRIYGANSIVEAAPGVSCLAFVDGGMDNNGASIIIGAYQMENNLVQFDKA…	55.3	1e-146	gi|147821120|emb|CAN68737.1|	hypothetical protein VITISV_030194 [Vitis vinifera]	-
4603	CotAD_37631	52630.6	0.15	5|1|5	7|2|8	1.37	0.048	0.208|0.249|0.001	CotAD_37631	MERGFEYVIVGGGVAAGYAALEFTKRGVSHAQLCIISEEPVAPYERPTLSKKFLHPESPARLPSFHTCVGANEELLTPTWYEEHGIELVLGTRVESVDVGQKTLLTASGETIRYETLIIATGAKALKLEEFGVKGSEAENVCYLRDLADADRLVNVMQSCTGGNAVVIGGGYIAMECAASLVTNKINVTMVFPEAHCMPRLFTPKIASYYEDYYQSKGVKFIRGTILSSFEFDSNGKVTAVNLRDGSQILADMVVVGIGIRPNTSLFEGQLTMEKGGIKVNGKLQTSNDSVYAVGDVAVFPVDLCGRIRRLEHVDSARKTAKHVAAVIMEPEKTGEFKYLPLFYSKAFSFSWRFYGDNAGEVVHFGDYLGTKFGAYWINNGHLVGSFLEGGTEDEFEAI…	76.25	0	gi|224055551|ref|XP_002298535.1|	predicted protein [Populus trichocarpa]	RSp1220
4615	Cotton_D_gene_10000019	32061.5	0.101	2|2|2	2|8|6	1.16	0.004	0.891|0.028|0.129	Cotton_D_gene_10000019	MRICGGKRLMFQVSVPPISIFATIICLTLPFLPPILSLQSAVNVWPKPRLVSWPKPLARSLSTNFTINSPYHQNLQPAISRYLRLFRTEHHHPLITPSVNVSTSSPHLQTLSIDISDPAAPLQHGVNETYSLSISEEGETANLTAETAWGAMRGLETFSQLVCGNPSVVPVGLYIWDAPLFAHRGVMLDTSRNYYGVEDILRTIEAMSANKLNVFHWHVTDSHSFPLMVPSEPELAAKGAYGPDMIYSPSDVAKIVQFGLEHGVRVLPEIDSPGKLFISKFLEFPHHS	71.67	4e-115	gi|225450263|ref|XP_002266897.1|	PREDICTED: beta-hexosaminidase-like [Vitis vinifera]	VC2217
4621	CotAD_62178	13506.2	0.226	2|-|-	5|-|-	1.63	-	0.003|-|-	CotAD_62178	MSFVDIFVANHEKFHAEADKNYWKAIAELIPNEVPTIEKRRKKEEKKPSIVVVQGPKPGKPTDCSRMRQILVKLKHNTPSHLKHSPPPPPAAAAAKDQDAKTGNTSSVPAALPVTSTPEAVVAA	63.64	1e-34	gi|224098537|ref|XP_002311210.1|	predicted protein [Populus trichocarpa]	-
4634	CotAD_61447	101937	0.237	4|1|-	13|4|-	1.49	-	0.001|0.003|-	CotAD_61447	MNTTQKKDLLHHLLLFFIIFSATSSSYLAVVHGVNEAVGYGYKLKSVSVDPEQKWLTADLALIRNSSVYGPDIQKLNLFVSFETSDRLRIRVTDSGHQRWEIPQEIIPRQSQNPFSLGSPANYPTRKLKETRSVSDPKSDLIFTLQNTTPFGFTVKRRSSGDTLFDASPDPSDPRTFLEFKEQYIQLSSALPENRSSLYGLGEHTKRSFKLQHDDTLTLWNSDLASANLDFNLYGSHPFYIDVRSASGNGRIAAGTSHGVLLFNSNGMDIVYGANRITYKVIGGIIDLYVFGGPLPHTVVQQYTELIGRPAPMPYWSFGFHQCRYGYKNVSDLEGVVAGYAKANIPLEVMWTDIDYMDGFKDFTLDPVNFPEDKMKQLVDELHRNGQKYVVIIDPGISV…	70.76	0	gi|255587355|ref|XP_002534242.1|	alpha-glucosidase, putative [Ricinus communis]	ECs4532
4636	Cotton_D_gene_10019153	116426	0.294	1|-|-	12|-|-	1.21	-	0.015|-|-	Cotton_D_gene_10019153	MGWLRAGSSVAKLAIRRTLSQGGSYAARSRIVPSQSRYFHTTVFKSKAQTAPVPRPVPLSKLTDSFLDGTSSVYLEELQRAWEADPDSVDESWDNFFRNFVGQAATSPGISGQTIQESMRLLLLVRAYQVNGHMKAKLDPLGLEEREIPDDLDPALYGFTEADLDREFFLGVWRMAGFLSENRPVQTLRSILTRLEQAYCGSIGFEYMHIADRDKCNWLRDKIETPTPMQYNRQRREVILDRLIWSTQFENFLATKWTTAKRFGLEGGETLIPGMKEMFDRAADLGVESIVIGMPHRGRLNVLGNVVRKPLRQIFSEFSGGTRPVDEVGLYTGTGDVKYHLGTSYDRPTRGGKRIHLSLVANPSHLEAVDPVVVGKTRAKQYYSNDEDRTKNMAILIHG…	92.13	0	gi|255575120|ref|XP_002528465.1|	2-oxoglutarate dehydrogenase, putative [Ricinus communis]	HI1662
4637	Cotton_D_gene_10017683	14431.5	0.193	2|3|2	15|16|14	1.55	0.016	0.002|0.001|0.001	Cotton_D_gene_10017683	MASNTVASAALLLTLNLLFFTLVSSTYVPCPPPPKSHKPTHKSPPSAPKQPATCPKDTLKLGVCADLLGSVRVVVGPSRTQCCSLISGLADLDAAVCLCTAIKANVLGVNLNVPVSLSLLLNSCEKQMPAGYKCA	95.35	2e-35	gi|224552010|gb|ACN54400.1|	hybrid proline-rich protein [Gossypium hirsutum]	-
4658	Cotton_D_gene_10006733	26147	0.523	2|2|7	5|6|17	1.17	0.012	0.065|0.037|0.641	Cotton_D_gene_10006733	MFLTRTEYDRGVNTFSPEGRLFQVEYAIEAIKLGSTAIGLKTKEGVVLAVEKRITSPLLEPSSVEKIMEIDEHIGCAMSGLIADARTLVEHARVETQNHRFSYGEPMTVESTTQALCDLALRFGEGDEESMSRPFGVSLLIAGHDENGPSLYYTDPSGTFWQCNGKAIGSGSEGADSSLQEQYNKDLTLQEAETIALSILKQVMEEKVTPNNVDIAKVAPTYHLYTPSEVEAVITRL	99.58	7e-177	gi|359806124|ref|NP_001241191.1|	uncharacterized protein LOC100799919 [Glycine max]	YGL011c
4661	Cotton_D_gene_10022948	34815.5	0.125	2|2|1	3|4|3	1.98	0.016	0.001|0.031|0.008	Cotton_D_gene_10022948	MAENLMHALQYNSYGGGAAALKHVEVPIPTPNKGEILLKLEATSLNPIDWKIQKGILRPLLPRKFPHIPASDVAGEVVKVGPGVTNYKVGDKVVSLLDHLTGGLAEYAVATENLTVARPPEISVAEAAGLPMAGLTAHRAVTHGAGVKLDGSGQQLNLLITAASGGVGHYAVQLAKLGNTHVTATCGARNLDFVKSLGADEVLDYKTPDGAALKSPSGRKYDVVIHCASGIPWSTFEPNLSSNGKVIDITPGLSAFLTCAMKKLTFSKKKLVPLFMSPKKENLDYLVNLLKDGKLKTVIDSTYPLSKAEEAWAKSMDGHATGKIIVEP	78.72	0	gi|462397211|gb|EMJ03010.1|	hypothetical protein PRUPE_ppa008401mg [Prunus persica]	Rv1454c
4664	CotAD_49290	13709	0.092	-|1|1	-|23|15	1.39	-	-|0.001|0.001	CotAD_49290	MKADTLAQPLVDAQIPFKIHIVKDHDLKERLCLEVERLGLSAVIMGSRGFGAARRTSKGRLGSVSDYCVHHCIYPVVVVRYPNEEEAKKKKITGEDAELQPVLEEELEYYDAEEEHRGLS	73.2	1e-47	gi|224114117|ref|XP_002316672.1|	predicted protein [Populus trichocarpa]	-
4665	CotAD_01506	48145.3	0.142	4|3|5	7|5|11	1.29	0.013	0.009|0.118|0.045	CotAD_01506	MIVNVKESTMVRPAGETPRRSLWNANVDLVVPRFHTPSVYFYRPNGAANFFDPQVMKEALSKALVPFYPMAGRLKRDEDGRIEIDCNGEGVLFVEAETNSVIDDFGDFAPTLELRQLIPTVDYSGGISTYPLLVLQVTYFKCGGASLGVGMQHHAADGYSGLHFINTWSDMVRGLDLTIPPFIDRTLLRARDPPQPVFHHVEYQPPPAMKIPPQSTGPESTAISIFKLTRDQLNALKAKCKEDGNDVNYSSYEMLSGHVWRSVCKARGLEDDQGTKLYIATDGRARLRPPLPPGYFGNVIFTATPIAVAGDLLSKPTWYAASRIHDALVRMDDEYLRSALDYLELQPDLSALVRGAHTFRCPNLGITSWVRLPIHDADFGWGRPIFMGPGGIPYEGLSF…	94.66	0	gi|396578192|gb|AFN85668.1|	putative hydroxycinnamoyl CoA shikimate/quinate hydroxycinnamoyl transferase [Hibiscus cannabinus]	-
4690	CotAD_12934	47006.3	0.211	1|1|1	6|9|7	3.92	0.482	0.001|0.001|0.018	CotAD_12934	MASLHCFLFTCLLFFFSSPSIAQQSFRPKALVIPVAKDASTLQYLSTISQRTPLMPIDLVVDLGGRHMWVDCDRDYVSSTYRPARCRSAQCSLAGADGCGDCFSAPRPGCNNNTCGVTPDNSVTHVATSGEVAQDVVSIQSTDGKNPGRVVSVPRFLFACAPSFLLQGLATGVVGMAGLGRTRIALPSQFAAAFSFHRKFAVCLSSSTSANGVIFFGDGPYVFLPGVDASQSLTYTPLFINPVSTASAFPMGEASAEYFIGVKSIKVNENSISLNTSLLSINNEGVGGTKISTVDPYTVLESSIFKAVTEAFINEATAMNISRVAGVAPFEVCFSSSNIASTRLGPAVPSIDLVLQNQNVFWRMFGSNSMVEVNRDVLCLGFVNGGSNPTTSIVIGGHQ…	77.24	0	gi|225436984|ref|XP_002272235.1|	PREDICTED: basic 7S globulin [Vitis vinifera]	-
4708	Cotton_D_gene_10002643	92008.7	0.425	1|1|1	7|7|14	1.45	0.002	0.001|0.003|0.001	Cotton_D_gene_10002643	MRKWAIPSALVLLCLLSLLSDHGRKVQVNAEEGAVDPPKVEEKIGAVPHGLQTDSDVVKRESESISSRSLRNNAEKFEFQAEVSRLMDIIINSLYSNKDIFLRELISNASDALDKIRFLSLTDKEVLGEGDTSKLDIQIKLDKEKKILSLRDRGIGMTKEDLIKNLGTIAKSGTSAFVEKMQSSGDLNLIGQFGVGFYSVYLVADYVEVISKHNDDKQYVWESKADGAFAISEDTWNEPLGRGTEIRLHLRDEAQEYLEESKLKELVKKYSEFINFPIYIWASKEVDVEVPADEDEPSDEEETSDSSSSEEGEDEDAEKSEDDDAEKKSKTKKVKETTYEWELLNDVKAIWLRSPKEVTDEEYTKFYHSLAKDFSDEKPLAWSHFTAEGDVEFKAVLFV…	85.77	0	gi|365189292|dbj|BAL42333.1|	Heat shock protein 90 [Nicotiana tabacum]	RC1302
4726	CotAD_06813	53396.1	0.242	3|8|9	10|10|21	3	0.343	0.001|0.002|0.001	CotAD_06813	MGEIRLFWLLFVWVLGIERGVSGLACNWGLQSTHPLPPNIVVKLLKDNGFDKVKLFEADPGALKALGKSGIQVMVGIPNDMLASLAGSAGNAEAWVQQNVSNYVSKYGTDIRVVAIGNEPFLHSYKDMFTQTTLPALQNIQAALAKAGLGKKVKTTVPLNADVYQTDSGLPSGGDFRPDVRDLMLKIIKFIQDNGGILTINIYPFLSLQADPNFPKEFAFFDNKANPVVDGPIVYTNVYDANFDTLISALEKNGFGQMPVVIGEVGWPTDCDPNANIDNARRFNQGLLDRIIRGQGTPKRRAPPDVYIFSLIDEDNKSVEPGNFERHWGIFNYDGSIKYPLDLGKGKALAPAKGVKYLARQWCVLSPSAGVSDPNALAQSISQACQYADCTSIGPGSSC…	72.83	0	gi|255550261|ref|XP_002516181.1|	Glucan endo-1,3-beta-glucosidase precursor, putative [Ricinus communis]	-
4738	Cotton_D_gene_10007017	46010.1	0.276	3|5|4	13|23|18	1.38	0.009	0.002|0.001|0.001	Cotton_D_gene_10007017	MDSDQGKLFIGGISWETSEDRLKEYFGQYGDILQTVVMRDKVTGRPRGFGFVVFSDPSVIDTVLQEKHTIDGRTVEAKRALSREEQQTSARSGNFNQGRNSGGGGNIRTKKIFVGGLPPTLTEDGFRQYFEAYGHVTDVVIMYDQNTQRPRGFGFISFDSEEAVDRVLHKSFHDLNGKQVEVKPALPKDANPGGASRSMGGGAGGFGGYQGYGSSGGNSSSYDGRMDSNYMRGQGTGAGFPPYGSSGYAPGYGYGPASNGVGYGSYGNYGGAGAGYGAPAGAAYGNPNAGYASGPPGAPRSSWGTQTPSGYGAMGYGNAAPWGAGPGSGGPGSAATGQSPTGATGYGGQGYGYGGYGCNDGSYGNAGYGAAGGRSGGTPNSNASAGGGDLQGSGGGYMG…	78.42	5e-118	gi|296083709|emb|CBI23698.3|	unnamed protein product [Vitis vinifera]	alr4683
4739	CotAD_35012	45789.8	0.074	2|3|1	3|9|2	1.31	0.02	0.469|0.001|0.480	CotAD_35012	MEKTDGIGKENGSTEEKQSFKDGSICGYNSLHHLLSANLKPQIYQEVSRLLLGLNCGKTLETIVLPESAKALSSKHDFDLQAFKFSADQELLREPRVVRVGLIQNSIALPTTAPFSDQKNAIFEKLGPIIDAAGASGVNILCLQEAWMMPFAFCTREKRWCEFAEPVNGESTQFLQEFARKYNMVIISSILERDINHGETLWNTAVIIGNHGNIIGKHRKNHIPRVGDFNESTYYMEGNTGHPVFETAYGKIAVNICYGRHHPLNWLAFGLNGAEIVFNPSATVGELSEPMWPIEARNAAIANRTEIFPNPFTSGDGKPQHPDFGHFYGSSHFSAPDASCTPSLSRYKDGLMISDMDLNLCRQLKDKWGFRMTARYELYADTLASYLKPDFEPQVISDP…	87.53	0	gi|224095800|ref|XP_002310485.1|	predicted protein [Populus trichocarpa]	jhp0294
4745	CotAD_47196	12403.1	0.558	1|3|2	1|7|9	2.71	0.188	0.125|0.005|0.001	CotAD_47196	MASSMYLKLACVVVLCMVVGAPLAQGAVTCGQVTSSLAPCINYLRGTGAGAIPPGCCSGIKSLNSAAQTTPDRQAACKCIKSAAAGISGINYGIASGLPGKCGVNIPYKISPSTDCSSVK	97.5	7e-78	gi|7012724|gb|AAF35186.1|AF195865_1	lipid transfer protein precursor [Gossypium hirsutum]	-
4752	Cotton_D_gene_10017216	25984.3	0.267	5|3|3	18|9|11	1.28	0.013	0.001|0.418|0.001	Cotton_D_gene_10017216	MGEEVKVFGYWASPYSYRAELALKLKGVSYEYINEDIFGNKSDLLLKYNPVHKKVPVLLHNGKPIVESLVILEYIEETWKHNPYLPQDPYDKATARFWIKFIDEKCFPTLWLAAWSAENEREKVTNEACEYLKTLESALNGKKFFGGETIGMVDIVASSVGYFIRVTQEIMGQNLLSADKFPQLFQWSEDFANCSIVKESLPPRDKLLPFVKGLIAKYQQDNAKA	97.33	2e-162	gi|195973264|gb|ABW69659.2|	glutathione S-transferase [Gossypium hirsutum]	all1745
4762	CotAD_21581	34198.1	0.282	5|-|5	23|-|47	2.04	-	0.001|-|0.001	CotAD_21581	MASTIPIVTLLIVMLSCHAANAQLSPNFYASSCPNLQTIVRNAMSRAVNRETRIGASILRLFFHDCFVNGCDGSILLDDTATFTGEKNAVPNRNSARGFEVIDTIKTNVEAACSATVSCADILALAARDGVALLGGPTWQVPLGRRDARTASQSAANNQIPSPFANLATLTSSFAAKGLSTRDLTALSGGHTIGLARCTTFRGRIYNDTNIDANFAATRRANCPASGGDNNLAPLDIQTPTRFDNDYFRNLVARRGLLHSDQELFNGGSQDALVRTYSNNPATFSADFAAAMVRMGNISPLTGTQGEIRRNCRVVN	99.68	0	gi|5453379|gb|AAD43561.1|AF155124_1	bacterial-induced peroxidase precursor [Gossypium hirsutum]	-
4768	CotAD_55270	115040	0.236	2|2|2	5|2|2	1.45	0.064	0.005|0.167|0.774	CotAD_55270	MPMAMMPIAIILLVAILLAGGVSSAESSYIEYNTTQRIVPGKINVHLVPHSHDDVGWLKTVDQYYFGGNNSIRGACVQNVLDSVISALFDDKNRKFIYVEMAFFQRWWRQQSNAKKIKVKELVNSGQLEFINGGMCMHDEATPHYIDLIDQTTLGHKYIKDEFNQIPRVGWQIDPFGHSAVQAYLLGAELGFDSLFFARIDYQDRAKRLKGKTLEVVWQGSKSLGSSSQIFTGIFPRHYDPPDGFTFEINDVSPPIQDDVLLFDYNVQERVNDFIAAALAQANVTRTNHIMWAMGTDFRYQYANSWFRQMDKFIHYVNQDGRINALYSTPSIYTDAKYAENVQWPLKTDDFFPYADKPNAYWTGYFTSRPAFKGYVRVLSAYYLAARQLEFFKGRSASG…	81.04	0	gi|470141192|ref|XP_004306319.1|	PREDICTED: lysosomal alpha-mannosidase-like [Fragaria vesca subsp. vesca]	-
4770	CotAD_62064	22538.8	0.296	1|1|1	9|6|13	1.29	0.012	0.187|0.248|0.001	CotAD_62064	MQRAVRAFSVHGNTVKNAILHRIRVVNPVIRPVMFSRSLTSASMEEHGFESTTISDVLKAKGKGADGSWLWCTTDDSVYDAVKSMTQHNVGALVVVKPGEQKSIAGIITERDYLRKIIVHGRSSKSTKVGDIMTEENKLITVTPETKVLQAMQLMTDNRIRHIPVINEKEMVGMVSIGDVVRAVVSEHRAELDRLNAYIQGGY	83.9	4e-118	gi|225434277|ref|XP_002262902.1|	PREDICTED: CBS domain-containing protein CBSX3, mitochondrial isoform 1 [Vitis vinifera]	PAE1028
4777	CotAD_12941	49446.8	0.375	11|9|10	29|32|31	1.33	0.002	0.001|0.001|0.001	CotAD_12941	MAAAVLRNPNSRRLLSFSSPIYWSSRGFISASNFSVSDLLSGNEVTVPANANPWWRSMATFTRTKPHVNVGTIGHVDHGKTTLTAAITKVLAEEGKAKAIAFDEIDKAPEEKKRGITIATAHVEYETMKRHYAHVDCPGHADYVKNMITGAAQMDGGILVVSAPDGPMPQTKEHILLARQVGVPSLVCFLNKVDAVDDPELLELVEMELRELLSFYKFPGDEIPIIRGSALSALQGTNEEIGKKAILKLMDAVDEYIPDPVRQLDKPFLMPIEDVFSIQGRGTVATGRVEQGTIKVGEEVEILGLTQGAPLKTTVTGVEMFKKILDQGQAGDNVGLLLRGLKRDDVQRGMVIAKPGSLKTYKRFEAEIYVLTKDEGGRHTAFESNYRPQFYLRTADVTG…	91.61	0	gi|255567660|ref|XP_002524809.1|	elongation factor tu, putative [Ricinus communis]	NMB0124
4786	Cotton_D_gene_10008637	36420.3	0.261	7|4|5	22|16|15	1.95	0.027	0.001|0.002|0.001	Cotton_D_gene_10008637	MAHFITFLLVLSLSLTFSLLPETASAQLRQNYYAKTCPNVESIVRNAVTQKFRQTFVTVPATIRLFFHDCFVQGCDASVIIQSTGSNKAEKDHPDNLSLAGDGFDTVIKAKQAVDAVTSCRNKVSCADILAMATRDVIALSGGPSYAVELGRLDGLSSTAASVNGKLPHPDFNLNQLNSMFAAHGLTQTDMIALSAAHSVGFSHCSKFSNRIYNFSRQSAVDPTLNRAYATQLQQMCPKNVDPRIAINMDPNTPRAFDNVYYKNLQQGKGLFTSDQVLFTDKRSKPVVNAWAANSNTFNSAFITAITKLGRVGVKTGRNGNIRRNCDAFN	85.06	0	gi|211906540|gb|ACJ11763.1|	class III peroxidase [Gossypium hirsutum]	-
4796	CotAD_52533	24786.3	0.272	-|3|3	-|22|25	7.66	-	-|0.001|0.001	CotAD_52533	MKTTTASVFLLFVIFSVTLSSILFGVANATNDPVLDIDGNEVQTGTPYYVVSSIWGAGGGGLALGRPSGNKCPEVVTQRRSGDNGIPVIFSNSDSNDGVVRQSSDINIEFIPLRPKLCRTTTVWKVDDCDHSAGKWWVITDGVKGNPGANTLTSWFRIEKVFDLNYKFKYCPTVCGTCPALCNEIGKDSDGEMVRFALSTGPGWSFYFKKVEKSAMEIEQVVHI	60.89	1e-84	gi|55139090|gb|AAV41233.1|	putative 21 kDa trypsin inhibitor [Theobroma bicolor]	-
4800	Cotton_D_gene_10007687	44068.4	0.337	3|2|2	5|5|7	1.4	0.084	0.293|0.850|0.047	Cotton_D_gene_10007687	MADPVVASHLSLVLKAHPTISSPSQFLLQQHSKPMASSLNSAASLRLFASSSSSSSAAARLSLRSTSLSFSSSLKSLAFSTLSRHKRGSAVSVSSTGGFSSVASPKCAASDPDQLKSAREDIKELLKSKFCHPILVRLGWHDAGTYNKNIEEWPRRGGANGSLRFEVELKHAANAGLVNALNLLQHIKDKYSGVTYADLFQLASATAIEEAGGPKIPMKYGRVDVSRPNECPEEGRLPAAGPPSPADHLREVFYRMGLNDKEIVALSGAHTLGRSRPDRSGWGKPETKYTKDGPGAPGGQSWTVQWLKFDNSYFKDIKAKRDEDLLVLPTDAVLFEDPSFKVYAEKYAEDQETFFKDYAEAHAKLSNLGAKFNPPEREKQKIGVVEEAFGGSPDEALPT…	93.9	0	gi|211906478|gb|ACJ11732.1|	stromal ascorbate peroxidase [Gossypium hirsutum]	MA0972
4807	CotAD_27951	7382.65	0.344	2|1|2	9|7|3	1.14	0.031	0.023|0.524|0.263	CotAD_27951	MAWIWLEAALPLGIIAGMLCVMGNAQYFIHKAYHGRPKHIGNDMWDVAMERRDKKLFENLSSSD	93.55	4e-38	gi|315937238|gb|ADU56177.1|	hypothetical protein [Jatropha curcas]	-
4820	CotAD_59745	50047.7	0.224	9|9|9	38|43|57	1.26	0	0.001|0.001|0.001	CotAD_59745	MVPKLLFSTFTILITCLFSFGIAQPCPRPRPCPSISPPPRPTRTVSYVRPRPPLYDPSLRLLPRQPNNNPGPLANRARILAITQELKRNITFDPQNYTPTWVGNNYCLFKGFICDTVPDLNITGLAGIDFNGARFGGNLNFYRFIQNLPDIAIFHANSNNFSGVINQGLGGLRYFYEIDLSNNKFIGGFPSNVLSAKNLTFVDLRFNNYLGTIPRSLFNFDTDVLFINNNVFGQGIPRNLGNTPALYLTLANNNFNGTIPRSIGAAWKTMTEVLLLGNKLSGCLPFEIGYLNRTTVFDVGSNRLTGPIPESFGCMAKLQLLNMAHNRFYGAVPEVLCRLPNAFNFTLSNNYFTQVGPQCRRLIKLRRLNVNRNCIMGLPFQRSATDCANFFSKPRSCAR…	66.15	0	gi|307135855|gb|ADN33724.1|	LRR-family protein [Cucumis melo subsp. melo]	MA2301_1
4821	CotAD_68114	43538.8	0.04	1|1|1	3|2|1	2.31	0.138	0.001|0.043|0.111	CotAD_68114	MKLEFPGLDANGGPCYIGTGCFHQRDALCGKKYDETCKVDWKRLNRREVEENATVLEETCKVLASCSFEQNTQWGNEMGLKYGCPAEDIITGLSIQCRGWKSIYLNPEREISFLGIAPTSLLTMLVQHKRWAEGHFQIFLSRYCSLLYGHNRIPLKLQLAYCAGNLWAANSLPTLYYVVVPCFCLLKDIPLFPKVSSLWVLPFAYVAIAHRAYSLGEFLWCGGTFQAWCNDQRMWLFKRTTSYFFALCDTILKLLGYSNPTFVITAKVADEDVSRRYEQELMEFGDSSPMFVVLASLAMLNLFSGFGAINKLVFNADHSEVSDRFGLQILLCFLLVALNWPVYNAVFFRKDNGGMPAPVTYKSITFALLVSTVDIST	63.81	7e-175	gi|225469932|ref|XP_002274290.1|	PREDICTED: cellulose synthase-like protein E6-like isoform 1 [Vitis vinifera]	aq_1407
4824	CotAD_54244	56209.5	0.075	2|2|3	3|6|11	1.36	0	0.166|0.005|0.010	CotAD_54244	MYSDPKPSFSFLILLFLCLQPLIFSLSTDASPPPTVCIVGSGIGGSSVAHFLRHYFHPSPSQPRPPNIKIFERSYVVGGRMATVSIGGETFEAGASILHPKNYHALNYSNLLGLKVKPPPASEDDDSMSLGIWDGKKFDFKTLQVDSKFPLLQKIVSYVNSFRIFFRYGFSLLKMGSFVESTVDSFLKYYESPERRPIFETVDEMLKWAGLYNLTTQTLQDELIGIKLSPLLIEELVTVITRINYGQSVYISGLAGAVSLAGSGGGLWSVDGGNWQMASGLINSSDVSLHLNEEIESISYLGEYYELNSTKRNSYSCEVAVVATPLDEVNIRFSPAVSIPERKLQHTHATFVRGLLNPAYFGLRTVAEIPELVGTLEDPDLPFTCISVLKQLDENDTTY…	73.38	0	gi|255550566|ref|XP_002516333.1|	conserved hypothetical protein [Ricinus communis]	-
4826	CotAD_11427	39845.5	0.117	-|1|-	-|1|-	1.49	-	-|0.001|-	CotAD_11427	MALLLTAQPSSLLLSKSLKVKSFFSQSPKPTSLSFPFSSKPHKPLSFSSFISLSSSRSDPTPESESDSDPETPTQINITDEWGERSELGSDPEPTKLPDSDPPRNEDEWEEQYVEKGNGTPAAAQGAAEPATADVAEGFDDRVADLKRCLVDSVYGTELGFRAGQELRAEILELVNQLEAVNPTRAPIEATQLLDGNWILLYTVFSELLPLLAAGATPLLKVKSISQSIDTASLSIVNSTTLSGPFADLSFSASATFEVRSPSRIQVEFKEGIVQPPEIKPSVDLPADIDVFGQRISLSPVQQSLGPLQDLVANISRTISGQPPLKIPIPGNRSSSWLLITYLDEDLRISRGDGGLFVLARQGSPLLEQ	68.47	3e-126	gi|224074334|ref|XP_002304354.1|	predicted protein [Populus trichocarpa]	-
4832	CotAD_02520	59036.6	0.389	4|4|3	30|13|17	1.68	0.011	0.001|0.001|0.001	CotAD_02520	MITSFLNIPIWRNELSISTESSSSGLVSVLLIKTLFFLIKSGSVRIIVTHKSMAGRILLLVLFMNAVFFIVNAVPETCPADLGGKCGEDGEWEGEFFPGVPKIKYEGPSSKNPLSYKWYNAEEVILGKKMKDWLRFSVAFWHTFRGTGADPFGAPTKYWPWEDGTNSIAMAKRRMRANFEFLSKLGVDRWCFHDRDIAPDGKTLKETNSNLDEVVALAEELQGDKIRPLWGTAQLFMHPRYMHGAATSSELGVYAYAAAQVKKAMEVTHYLGGENYVFWGGREGYQTLLNTDMERELDHMAKFLEAAAAYKKKIGFNGTLLIEPKPQEPTKHQYDWDAATTLNFLRKYGLLAEFKLNIECNHATLSGHSCHHDLETARINGMLGNIDANTGDPQVGWDT…	83.63	0	gi|297735328|emb|CBI17768.3|	unnamed protein product [Vitis vinifera]	L0230
4858	CotAD_51491	29563.4	0.504	1|1|1	5|3|7	1.3	0.009	0.001|0.002|0.001	CotAD_51491	MGKGPGLYTEIGKKARDLLYKDYQTDHKFTLTTSSPTGVAITSAGTKKGELFLADVNTQLKNKNVTTDIKVDTYSNLYTTITVDQPAPGLKAIFSFRVPDQRSGKVELQYLHEYAGISSSIGLTANPIVNLSGVIGTNVLALGTDLSFDTKTGNFTKCNAGLSFSNVDLIASLTLNEKGDSLNASYYHIVNPMTNTAVGAEVTHSFSTNENTITIGTQHALDPLTMVKARVNNAGKASALIQHEWRPRSLITISGEVDTKSIDKSAKVGLALALKP	85.51	2e-178	gi|449459452|ref|XP_004147460.1|	PREDICTED: mitochondrial outer membrane protein porin of 34 kDa-like [Cucumis sativus]	-
4860	CotAD_08789	37600.6	0.631	3|4|3	17|24|30	1.36	0.002	0.001|0.001|0.001	CotAD_08789	MAIEIPRVKLGTQGFEVSKLGFGCMSLTGHDHSVSDEDGIAIIKHAVERGVTHIDTADLYGPKTNEILVGKALKHLPREKVQLATKFGVESMGPDGPVINGTPEFVRSSLEASLQRLDVDYIDLYYIIRVDRKTPIEDTMEELKKLVEEGKIKYIGISEASPETIRRAHAVHPLTAVQLEWSLWTRDVEEELIPLCRELGIGIVAYSPLGHGFFAGKAKEDTSNSSLGVFPRFQGENLEQNRILYSKVEKLAGKHGCTPAQLALAWVLHQGDDVSPIPGTTKIKNLDSNIESVKVKLTKEDLKEITDAIPIHEVAGGTYPEGLKQFTWKYGNTPPNKRT	68.53	2e-168	gi|470132346|ref|XP_004302044.1|	PREDICTED: probable aldo-keto reductase 1-like [Fragaria vesca subsp. vesca]	ydjG
4866	CotAD_09292	34437.4	0.146	2|3|3	8|13|12	1.84	0.015	0.022|0.001|0.001	CotAD_09292	MLYGLLTLTSLAILLQGLGTSAQQCGRQAGGALCANRLCCSQFGWCGSTPEYCGTGCQSQCGGSTPTPSGGSGVGSIITRDLFNQMLKYRNDPRCPSNGFYTYDAFITAARSFNGFGTTGDLATRKRELAAFFGQTSHETTGGWPTAPDGPYAWGYCFIREQNNPGAYCTLGSWPCAPGRQYFGRGPIQLTHNYNYGPAGRAIGEDLINNPDLVATNAILSFKTAIWFWMTPQGNKPSCHSVIIGGWRPSGADTAAGRVPGYGVITNIINGGLECGRGPDNRVASRIGFYRRYCDILGINTGSNLDCNNQRPFG	77.41	7e-155	gi|289719778|gb|ACH92946.2|	class I chitinase [Dimocarpus longan]	VC0769
4887	Cotton_D_gene_10019387	42928.3	0.266	5|2|2	9|4|3	1.31	0.019	0.014|0.586|0.097	Cotton_D_gene_10019387	MEFWGVLISGVLVSWWVLSVNGANLPPCQFPAIYNFGDSNSDTGGISAAFEPIRAPYGVPYFHKPSGRDSDGRLIIDFIAERLKLPYLHAYLNSLGANFRHGANFATGGSTIRRPNETIYEYGISPFGLDMQIIQFEQFKARATEMYNQAKDPSEKDKLPRPEDFSKALYTFDIGQNDLSVGFRKLSFDQLRASIPDIINQLASAVHHLYEQGGRSFWIHNTGPIGCLPVNFFYILNPEPGYVDQYGCVKKQNEMAMEFNRQLKDRVIKLRTELPEASITLVDVYTAKIAMIGNAKNLGMADPLKPCCGYHVNYDHVWCGNKAIINKTEVFGASCKNPSMFVSWDGVHYTQAANQYVADRTLNGSLSDPAILITQACHKQ	76.4	0	gi|255560956|ref|XP_002521491.1|	Esterase precursor, putative [Ricinus communis]	all3634
4895	CotAD_74064	40468.4	0.172	5|2|1	7|2|3	1.83	0.123	0.019|0.051|0.002	CotAD_74064	MKLSAVFSSSCYSSAIAKNALQPPSLITLSASTFLPPLSRQLSCRHGVSYNRLSFRGNSSFSSTAVSASKSDSQSQGSESFFRDTLRSMETVYLNRNPTAKSILKLVSSVDDEQICYDHLAFRTFGVNGYGINSLASLFLDYGYTPKEELRFPAKKLKALWFSPPNSSSQDGGSGVNGPLPRVFISELLVDQLSPRAQSGSGNKYVALASALGSLTWEKPLYSEFQQLAGESEYAAWTLVNGYALNHVTISTHRLKSNLRNIKSLNEFIEKNGFKLNSDGGVLKVSPDGLLLQSSTVADSMPFSFSDGVDESVPCSYIEFAERLVLPQYKNLSESEIKESHRRDGFEVGNADKIFESTSKEQLTRRA	80.07	5e-174	gi|296086430|emb|CBI32019.3|	unnamed protein product [Vitis vinifera]	-
4897	CotAD_21013	47110	0.257	8|6|7	22|23|16	1.49	0.007	0.001|0.001|0.001	CotAD_21013	MGEKWVLMKTAQTPTNIAVIKYWGKRDETLILPVNDSISVTLDPAHLCTTTTVAVSPAFQQDRMWLNGKEISLSGGRYQNCLREIRKRAREVEDKERGIKIEKKDWAKLHLHIASYNNFPKAAGLASSAAGFAFFALAKLMNVSEDESQLSAIARQGSGSACRSLFGGFVKWIMGKEDDGSDSLAVQLVDEKHWEDLFIIIAVVSSRQKETSSTSGMRESVETSSLLQHRAKEVVPKRTIQMEEAIQNRDFASFAKLACADSNQFHAVCLDTLPPIFYMNDTSHRQVLVYICWIISYVEKCNRSEGTPQVAYTFDAGPNAVLIARDRKAAAQLIQRLLFYFPPKSDTDLDSYLLGDKTILKDAGLEGLKDVEALSPPPENGSAQKYPGDVSYFICTRPG…	81.8	0	gi|164604978|dbj|BAF98285.1|	diphosphomevelonate decarboxylase [Hevea brasiliensis]	SPy0877
4902	Cotton_D_gene_10008243	18737.5	0.063	1|1|1	10|4|3	1.52	0.094	0.006|0.425|0.008	Cotton_D_gene_10008243	MRGLSVLSWILIICVCQVAVRSQYYSDTVPYQPRPVVVTNLHFYMHEFTGTTAVVLTQANITSNNTSVTFAPLVAVNDPLRTGPEPDSELIGNVQGISLLAGSNASSTQYIDFGFNTGKFNGSSLSVFSRGEAGLAVVGGRGQFTMATGTALFNPILINATNVIIEFNVTVIHY	95.4	1e-119	gi|66276977|gb|AAY44415.1|	dirigent-like protein [Gossypium barbadense]	-
4903	Cotton_D_gene_10024992	129766	0.005	-|-|1	-|-|2	5.75	-	-|-|0.002	Cotton_D_gene_10024992	MSSTLSSSTTKTLLASLHLEYAKFRPFSILGSFQFSTTTSKPEDQNATVKNHSQFSELDNSIYTILTIDRWESLNHMNYKLASLRQVHGRLALRFLNFFINQPGLEHNHLTHVLSITTHILVRARMYDSAKSLLRQLCKLGVGSRFVFGALMDTYSLCNSNPSVFDLLIRVYLKDGMIDNALETFNLMRFRGFKPSVYTCNMMLGSMVKDGRVCSVWEFFKELLDLKICPNIATFNILINVLCVEGKLEKAVYLLRKMENSGYVPTIVTYNTLLHWFCKNGRYKSAFELIDRMGSKGIEADVCTYNMLIDDLCRNDRSAKAYLLLKKMRKRRISPNAITYNTLINGFVKVGSLGVATRIFDEMAYFNLSPNVATYNALIEGHSNEGNFEEALRLMDMME…	62.88	0	gi|359493281|ref|XP_002272603.2|	PREDICTED: pentatricopeptide repeat-containing protein At5g55840-like [Vitis vinifera]	-
4906	CotAD_28922	55651.8	0.623	4|4|4	50|47|55	1.27	0.006	0.001|0.001|0.001	CotAD_28922	MAPSLTSNSFLLTTTPRSRVNLKYQRLAVFAKGSGPFSPFQFGKAKDNPEDGQAEDTGNSSPFRFDFGKLPDVKTLVPLVSNPSSGLSFGNVRRKDPSTVFVAGATGQAGIRIAQTLLRQGFTVRAGVPELAGAQELARLAAQYKIISNEESKRLNAVESTFQDAESIAKAIGNASKVVVTIGPGENGPTSAVSASDAVQVIQAAQLAGVGHVAIVYDGNPGNGSTYNVLDGITSFFSNLFSQSQPLSLSEFLQKIIETDVSYTFLKTTLADDYSEESSYNVVVSAEGSIGTNDYKVAKSQIASLVADVFSNTAVAENKVVEVFTSPSAPSKSVDELFSAIPEDGRRKAYAEATARAKAEEEAVLAAEKAREAAEAAKKLEEEVKKLSEQEAKAANLAE…	74.14	0	gi|118486499|gb|ABK95089.1|	unknown [Populus trichocarpa]	-
4907	Cotton_D_gene_10021741	33543.9	0.163	1|3|1	2|3|4	1.58	0.059	0.284|0.006|0.116	Cotton_D_gene_10021741	MKWVKVIVSFILTLSFLSFPSCAFQSDELLVDDEEFGLEGAPQHRSPEPIPTRSPPVTSPTRKRHSDLDSDSKIQFSLDHAFGDSDFSPAGTFSARLKTWSHGGQTLTKLRFSRNSFSDVEKEKFKNLLESDDFYRIRLPSNVLSPPGRDFIISSVKARCLPRESLDEHFVIHMEGVNVLAVNYGSPGSCPYPRNLKLPAKWSFSSHTVLKNSEQAPRAPVFTEEILGGENAEGEVVQPAERSFWAKYWMYLIPLGLIVMNAITQAMNMPEEQATGQVPAQGQPSAGAVQRGPSSAVRRR	69.84	9e-149	gi|255547524|ref|XP_002514819.1|	conserved hypothetical protein [Ricinus communis]	-
4908	CotAD_06918	25431.8	0.43	2|2|2	9|8|13	1.34	0.004	0.001|0.002|0.001	CotAD_06918	MDLDMNVNAPHSMGTTIIGVTYNGGVVLGADSRTSTGMYVANRASDKITQLTDNVYVCRSGSAADSQIVSDYVRYFLHQHTIQLGQPATVKVSANLIRLLSYNNKNMLQTGLIVGGWDKYEGGKIYGIPLGGTLIEQPFAIGGSGSSYLYGFFDQAWKEGMTKEEAEQLVVKAVSLAIARDGASGGVVRTVIINSDGVTRNFYPGDKLQLWHDELEPQNSLLDILNAPSPEPMNI	93.07	3e-157	gi|15235889|ref|NP_194858.1|	proteasome subunit beta type-6 [Arabidopsis thaliana]	SPAC4A8.13c
4915	Cotton_D_gene_10026084	48599.7	0.024	-|-|1	-|-|1	7.16	-	-|-|0.022	Cotton_D_gene_10026084	MEQPLLSEEKRSEIDENERLSSYQYVGRTGSVIPTASLAGTDVSIEEIRSATSFSTPYPPSIHAPLISSPEPLPNEQAIPHQSPYAADYGAYSNDFQRQLLDEVEIRELLIDHIGHRCCWGSHPARTWKIHAVEDCNVYVGTLETFLEEREVIRETEPYLGGKIDGKDNTPELGIWELDLRSQFPVLFVPYKETRVKIPNSETVEKCSDCAGQGDIPCPTCNADQEPGFYKENQMSQCPACYGRGLIAHRDGSDTICTKCDGKGKIPCATCGSRGLLKCKTCNGSGSLLTRKIAVVKWKTLSTRKVSATSGAASVPDEIFHRAKGVQLCNTQAYQCTPAYFADSFFLNTFSSDVIADRASVPPTARVICERHTISVVPVTRVTMRHHRQSFSFYIVGYS…	79.63	0	gi|255573913|ref|XP_002527875.1|	conserved hypothetical protein [Ricinus communis]	-
4928	CotAD_18950	18275.5	0.837	6|7|8	51|41|57	1.26	0.001	0.001|0.001|0.001	CotAD_18950	MPGARSIGVAMDFSASSKNALKWAIDNLADKGDALYIIHINNNSLDESRNALWAKSGSPLIPLTEFRVPEIMKKYDVETDIEVLDMLDTASRQKEINVVSKIYWGGDAREKILDAIEDLKLDSLVMGSRGLGTVRRIILGSVSNYVVTHATCPVTIVKEQSSSSKH	77.3	9e-95	gi|255586970|ref|XP_002534082.1|	conserved hypothetical protein [Ricinus communis]	MJ0531
4942	CotAD_28723	28825	0.48	5|4|3	48|23|25	1.5	0.008	0.001|0.001|0.001	CotAD_28723	MGKGPGLYTEIGKKARDLLYKDYQTDQKFTLTTSSPTGVAITSTGTKKGDLFLADVNTQLKSRNVTTDIKVDTSSNAIDEPAPGLKAIFGFRVPDQRSGKIELQYLHEYAGISSSIGLTANPIVNFSGVLGTNVLALGTDISFDTKTGNFTKCNAGFSFTKADLIASLALNEKGDSVNASYYHIVNPSTNTAVGAEVTHSFSTNVNTITVGTQHALDPLTTIKARVNNAGKASALIQHEWRPKSLFTISGEVDTKSIDKSPKVGLALALKP	81.52	2e-167	gi|449459452|ref|XP_004147460.1|	PREDICTED: mitochondrial outer membrane protein porin of 34 kDa-like [Cucumis sativus]	-
4960	Cotton_D_gene_10035865	34552.8	0.062	2|2|1	3|5|2	2.03	0.082	0.070|0.048|0.036	Cotton_D_gene_10035865	MSTMFLRSLLLPLICVLALATWSHGMSRGQQRPSSLDAASNTLQYHGGPLLTKPNGINVYLIWYGGFSLKDRNSITDFFASFASPGRRQGPSVSTWWRTISTYKDKTGKPVSDTVRLVKQVGDVYSSGKTLKRAQLANSVKSKIESKIFPLDPNGIYLVLTAKDVTVERFCMGSCGFHDSILVGGSTRVVFAHVGDPTVQCPGLCAWPYALPAYGPPGPALVAPNGIGTDGMIINIATLLAGATTNPFKTGYFQGDALAPLEAVTACPGIFGAGAYPGYPGALLVDKMSKASYNAYGANGRKFLLPATWDLIRLNCKVIT	70.72	2e-130	gi|224131076|ref|XP_002320995.1|	predicted protein [Populus trichocarpa]	-
4961	CotAD_74992	19321.6	0.082	-|1|-	-|1|-	7.95	-	-|0.030|-	CotAD_74992	MIRKKVKLAYITNDSSRKATYKKRNKGLMKKMSELNILCGIDNCAIIKWVVHGLNFGDINDLNLLLDEKMSNIVKRMDAFAMKPLYTQGALSSSSSSMVALPPMTMVMPKAIPRTGTKGIVQLDVNNMDPMKRQQWIMELMNNNNNNPQTHVGGDEMMFQFGDNTNPNSGH	78.72	1e-17	gi|224124310|ref|XP_002329991.1|	predicted protein [Populus trichocarpa]	-
4987	Cotton_D_gene_10035998	31372.1	0.249	1|4|4	2|6|10	2.15	0.189	0.037|0.013|0.005	Cotton_D_gene_10035998	MRLYDPNQPALQALKGSDIEVMLGLPNDDLPRIAGSQAEANTWVQNNVKNYGDVKFRYIAVGNEVQPSDPKARSLFPAMQNIHNAIVAAGLSNQIKVSTAIDTITLAESSPPSKGSFKPESREVLDPIIGFLANNQAPLLVNLYPYFSYDDNSVIDLPYALFTAPNPVVEDPPLRYSNLFDAILDAVYSALEKAGGGSLEIVISESGWPTAGGRKRAATSIENARTYNQNLINHVKKGTPKKPGKPIETYIFAMFDENTKTGEEIEKHWGLFLPNRQPKYQINFN	70.98	5e-133	gi|188011481|gb|ACD45060.1|	beta-1,3-glucanase [Vitis riparia]	YGR282c
4993	CotAD_27707	20332.7	0.168	2|3|2	22|16|21	2.26	0.079	0.001|0.001|0.001	CotAD_27707	MEFTLVALTSLIALALVHPSHAQNSPQDYLVLPSQAQDSQQDYLALGGDSPQDYLNAHNAARAAVGVGPMIWDKTVAAYAQNYANQRYYDCNLIHSGGPYGENLAWSSADFSGTSAVRMWVSERVNYNYNSNSCAAGKVCGHYTQVVWRNSIRLGCAKVRCNTGGTFITCNYAPAGNIIGQRPY	74.19	7e-73	gi|224105795|ref|XP_002313934.1|	predicted protein [Populus trichocarpa]	YJL079c
4996	CotAD_31654	18621.6	0.138	2|2|2	4|3|5	1.31	0.002	0.092|0.296|0.027	CotAD_31654	MASPICFYLLFLSLLSQTQLSFSTTHTPIDHGRPLVTSIADVHDLLPKYGLPKGIVPNNVKSYTLSSTGDFTIELESTCYVQFDDLVYYDKTISGKLSYGAVHDVSGIQAKKLFLWLPVTGIEVNGKSGMVQFFVGAFSKEFPAVQFEDIPVCKRKAVLRVDLFASM	65.44	7e-60	gi|255580088|ref|XP_002530877.1|	conserved hypothetical protein [Ricinus communis]	-
5000	CotAD_28334	39341.7	0.315	4|4|5	25|21|23	1.47	0.02	0.001|0.002|0.001	CotAD_28334	MSLLNDLINLNLSDTTEKIIAEYIWIGGSGMDLRSKARTLPGPVTDPSKLPKWNYDGSSTNQAPGDDSEVILYPQAIFKDPFRKGNNILVMCDAYTPAGEPIPTNKRFNAAKIFSHPDVVAEEPWYGIEQEYTLLQKDTKWPLGWPVGGFPGPQGPYYCGVGADKSFGRDIVDSHYKACLYAGVNISGINGEVMPGQWEFQVGPSVGISAGDQIWIARYILERITEIAGVVLSFDPKPIPGDWNGAGAHTNYSTKSMRNDGGINVIKKAIEKLGLRHKEHIAAYGEGNERRLTGRHETADINSFSWGVANRGASIRVGRDTEKDGKGYFEDRRPASNMDPYVVTSMIAETTIIWKP	100	0	gi|211906462|gb|ACJ11724.1|	glutamine synthase [Gossypium hirsutum]	mll0343
5012	CotAD_08794	37696.6	0.578	1|1|-	11|2|-	1.43	-	0.034|0.178|-	CotAD_08794	MAIEIPRVKLGTQGFEVSKLGFGCMSLTGHDHSVSDEDGIAIIKHAVERGVTHIDTADLYGPKTNEILVGKALKHLPREKVQLATKFGVESMGPDGPVINGTPEFVRSSLEASLQRLDVDYIDLYYIIRVDRKTPIEDTMEELKKLVEEGKIKYIGISEASPETIRRAHAVHPLTAVQLEWSLWTRDVEEELIPLCRELGIGIVAYSPLGHGFFAGKAKEDTSNSSLEVYPRFQGENLEQNRILYSKVEKLAEKHGCTPAQLALAWVLHQGDDVSPIPGTTKIKNLDSNIESVKVKLTKEDLKEISDAIPIQEVAGGTYPDDLKQFTWKYGNTPPKKSA	69.21	3e-172	gi|470132346|ref|XP_004302044.1|	PREDICTED: probable aldo-keto reductase 1-like [Fragaria vesca subsp. vesca]	ydjG
5030	CotAD_48812	35215	0.952	3|3|3	65|66|84	1.31	0	0.001|0.001|0.001	CotAD_48812	MAVSLQAAATLMQPIKVAAPSRTNVPLRSSQSVSKAFGLEPVGARLTCSLQTDLKDLALKCVDATKLAGFALATSALVVSGASAEGVSKRLTYAEIQSKTYMEVKGTGTANQCPTIDGGVDSFAFKPGKYYAKKFCLEPTSFTVKAEGVNKNAPPEFQNTKLMTRLTYTLDEIEGPFEVSTDGTLKFEEKDGIDYAAVTVQLPGGERVPFLFTIKQLVASGKPDSFGGDFLVPSYRGSSFLDPKGRGGSTGYDNAVALPAGGRGDEEELAKENNKSAASSSGKITLSVTKSKPETGEVIGVFESLQPSDTDLGAKTPKDVKITGVWYAQLDS	88.82	0	gi|224094610|ref|XP_002310188.1|	hypothetical protein POPTRDRAFT_813989 [Populus trichocarpa]	-
5038	Cotton_D_gene_10000875	20775.8	0.267	1|1|1	3|3|7	1.25	0.006	0.155|0.659|0.022	Cotton_D_gene_10000875	MSSWPDKLSDQDLDVVKNAGIVLLQREIPDSVNIQVAKAAKGAGVTVIMDAGGMDAPMPQELLKFVDIFSPNESELRRLTGMPTDNFEQISQAAAKCHKMGVRQVLVKLGAKGSALFIEGEEPITQPIIPAAQVVDTTGAGDTFTASFAVALVEGKSKRECLNFAAAAASLCVQVKGAIPSMPDRKSILNLLQSV	81.03	3e-106	gi|470116004|ref|XP_004294178.1|	PREDICTED: ribokinase-like [Fragaria vesca subsp. vesca]	Z2810
5039	CotAD_14130	34627	0.026	1|-|1	1|-|2	4.2	-	0.065|-|0.002	CotAD_14130	ALTIVIKEILUNFRINSFUVUCCKGINITIIQIFFDVQYYIUILILYNFIHKIFLUSNSCKPIATFQLSIILRLYTMYTNDYINSIUKUIDLFICQPMISANTISTFSSGSPAVKPCHIPGYNFMVSLTCQPTIRNMDLSUALPMLFSVLVCLGISAYCSLPAPISASRLTGSLNAESTTSFEGTIFHLGITCSILVNIFITTLIRLTVAATLHMGATRTAPFGKPWRQIFGVEUKRFKITSIALGLAMSFVINPKHRISSIDRARMVTKEDEWQTIRNGQLISIKLWNVSSNTRVTUSLTN	-	-	-	-	-
5046	CotAD_73291	21866.3	0.145	1|1|1	4|2|2	2.26	0.187	0.001|0.017|0.092	CotAD_73291	MNQSEWISYEYKAVNLSKGEQFTPEFEKLNPLHFVPVLDDGDVVVSDSYAILLYLEEKYPQIALLPADPQLKALNLQVASIVTSSIQPLHMLSNLKYLVQKVGPQESLLFAQTNVEKGFNALEKLLKDINGKYASGDEVYMADVFMAPQIAVAMQRFKIDMSKYPRLCRIFESLKALPEFLDASPERQPDAVH	74.33	8e-89	gi|255541314|ref|XP_002511721.1|	glutathione-s-transferase theta, gst, putative [Ricinus communis]	PA1623
5047	CotAD_72472	42990.2	0.072	-|3|3	-|10|14	1.64	-	-|0.003|0.001	CotAD_72472	MVTVEEVRKAQRAQGPATVLAIGTSTPPNCVDQSTYPDYYFRITNSEHKTELKEKFKRMCEKSMIKKRYMYLTEEILKENPNVCEYMAPSLDARQDMVVVEVPKLGKEAATKAIKEWGQPKSKITHLVFCTTSGVDMPGADYQLTKLLGLRPSVKRLMMYQQGCFAGGTVLRVAKDLAENNKGARVLVVCSEITAVTFRGPSDTHLDSLVGQALFGDGAAAVIIGADPVPEIEKPMFEIVSVAQTILPDSDGAIDGHLREVGLTFHLLKDVPGLISKNIEKSLVEAFQPLGISDWNSLFWIAHPGGPAILDQVEAKLALKPEKLRATRHVLSEYGNMSSACVLFILDEMRKKSREDGLQTTGEGLEWGVLFGFGPGLTVETVVLHSVAA	99.74	0	gi|197259944|gb|ACH56521.1|	chalcone synthase [Gossypium hirsutum]	MT1698
5064	Cotton_D_gene_10021525	23962.2	0.392	5|5|4	42|39|38	1.37	0.004	0.001|0.001|0.001	Cotton_D_gene_10021525	MAMLYNFNNVSLYSKKFSVKNPSKSPLCFIKPHSLNYHKPKVFEDKLEKGSFSLSETFSKAGLLALVSASILLVDPALAFKGGGPYGSEVTRGQDLTGKDFSGKTLIKQDFKTSILRQANFKGAKLLGASFFDADLTGADLSEADLRGVDFSLANVTKANLSNANLEGALATGNTSFKGSNITGADFTDVPLRDDQREYLCKIADGVNPTTGNATRDTLLCN	74.01	3e-100	gi|351722845|ref|NP_001236746.1|	uncharacterized protein LOC100500352 [Glycine max]	mlr4046
5065	CotAD_17365	55091.6	0.262	2|5|4	5|10|10	1.55	0.006	0.206|0.002|0.005	CotAD_17365	MICRRILLKRVWNNGRRWLVPSSSLSPVPTTADYKLHFSTHIMAAFSFPQNNQFTLKIPYMENICKFSSNAVADLHTNGIVDVPLAQTGEGIAECELLKWFIQEGDEVEEFQPLCEVQSDKATIEITSRYKGRVAQVLHVPGSIVKVGETLLKMAVEDTQVPLVTLSNLENEKQPDTKSNKDFTGGVISTPAVRNLAKEHGININDVQGSGKDGRVLKEDVLKYATQEGIIKDTLVTATADLGQLLHREKSSLLESAQVSGHYEDTIVPLRGFQRTMVKTMSMAAKVPHFHYVEEIDCDALRELKASFQTNNLEPGIKFTFLPVLIKSLSMALSKYPMVNSCFNEESVEVILRGSHNIGIAMATPNGLVVPNIKNVQSLSILEIRKELSRLQQLSLDNK…	67.13	0	gi|255551811|ref|XP_002516951.1|	lipoamide acyltransferase component of branched-chain alpha-keto acid dehydrogenase, putative [Ricinus communis]	MYPU_7620
5077	CotAD_05647	40448.2	0.188	2|2|1	10|3|4	1.09	0.02	0.024|0.686|0.773	CotAD_05647	MVKLCVLFGVAVLLSLSFGFINGAPQVPCYFIFGDSLVDNGNNNRLSSLAKANYMPYGIDFPNGPTGRFSNGKTTVDVIAELLGFENYIPPYSAARGRQILGGVNYASAAAGIREETGQQLGARISFSGQVRNYRQTVSQVVNLLGSEANAANYLSKCIYSIGLGSNDYLNNYFMPLFYSTSRRYNPEQYANVLIQQYTQQLQALYNYGARKFVLIGVGQIGCSPNALAQNSRDGRTCVERINAANRIFNSKLKGLVDQFNNANSDAKFIYIDVYGIFQDVTRNPSAYGFRVTNAGCCGVGRNNGQITCLPLQRPCRNRNEYLFWDAFHPTEAANVIIGRRSYNAQSPSDAYPIDIRRLAQL	76.58	0	gi|225462452|ref|XP_002266118.1|	PREDICTED: GDSL esterase/lipase At5g45670 [Vitis vinifera]	VCA0218
5081	Cotton_D_gene_10030802	32008.6	0.134	2|2|2	15|14|16	2.09	0.018	0.001|0.001|0.001	Cotton_D_gene_10030802	MERKSQAKPILFFFVLVSALIETSYAGDIAIYWGQNGNEGTLSDTCATGRYKYVNIGFLNTFGNGATPGLNLAGHCSPASNGCTSLSGEIKSCQNQGIKVMLSLGGGAGSYSLASQEDAKSVADYLWNNFLGGTSSSRPLGDAVLDGIDFDIEAGSGQYWDDLARSLSAYSSQGRKVYLTAAPQCPFPDAHLGTAINTGLFDYVWIQFYNNPLAQCQYASGNTKDILNSWNQWTSINAGSIFLGLPASPEAAGSGYIPPDVLTSQILPTIKSSGKYGGVMLWSKFFDNDYSAAIINSV	97.99	0	gi|124294787|gb|ABN03967.1|	acidic chitinase [Gossypium hirsutum]	VC1952_2
5085	CotAD_31456	30204	0.268	-|1|1	-|2|2	1.19	-	-|0.001|0.001	CotAD_31456	MASQPLTFLFLLLVTTSVLESSASFEPNIRLPTTATSVPRSNIDDDLYCASWQLAVETNNAGSWAAIPSRCVPFVRAYMTGQRYASDCEVVANYSLAYASTVQIASDGKDAWVFDVDETLLTNLPYYRDHGFGINGIEITGSGISEIFNESCWDEWVAEAKAPAIPSSLKLYNGLKQMGFKIFVLTGRSEHQRNDTRKNLELAGYTGWEGLILRGASDGGTPATIFKSERRSVLVNEGYRIHGNSGDQWSDLLGFAVAKRSFKLPNPMYYIA	63.86	1e-110	gi|462398005|gb|EMJ03673.1|	hypothetical protein PRUPE_ppa010268mg [Prunus persica]	-
5086	Cotton_D_gene_10024897	56582.7	0.209	7|4|6	46|21|26	1.72	0.003	0.001|0.001|0.001	Cotton_D_gene_10024897	MGTIVQTTVVTVFLCLLFPIVFSTSNDGLFRIGLKKRKFDRNNLLAAQLDSKEGEALRGSFRKYLHGNLQESKDIDIVALKNYMDAQYFGEIGIGTPPQNFTVIFDTGSSNLWVPSSKCYFSIACYFHSRYKSSHSSTYNANGKPADIKYGTGQISGFFSEDHVTVGDLVVKNQEFIEATSEPSLTFLLAKFDGILGLGFQEISVGNAVPVWYNMVNQGLVKEPVFSFWLSRNSEDNLGGELVFGGMDPKHFKGNHTYVPVTRKGYWQFDMGDFLIGNETTGFCAGGCSAIADSGTSLLAGPTGIITQINHAIGASGVVSQECKAVVSEYGEKILDMLLAKDEPKKICSQIGLCLFDGTQGVSMEIESIVNENAGKASGSLRDAMCSTCEMAVIWMQNQ…	83.46	0	gi|21616051|emb|CAC86003.1|	aspartic proteinase [Theobroma cacao]	-
5087	CotAD_72834	35903	0.098	-|1|-	-|3|-	1.85	-	-|0.001|-	CotAD_72834	MSRTILESTIVDKHEQWMVDFSRKYESKLEKEKRLNIFKDNLEYIESFNNGGNRSFKLGLNEFSDMTQDEFISTHTGYKMQNNPTLFESTSFMYENYSSAPKNFDWRDQNAVTHIKNQGGCRCCWAFSAAAAVEGLIKIKTGKLISLSEQQLLDCSRNGGNQGCNGGWMMNAFDYISQNQGIASEESYPYKQIQETCDTQINEVATISGYQMVPKNDEEALLKAVTNQPVSVALEGHGRDFQFYNGGVFTGDCGNSLTHAVTIVGYGTSEEGLNYWLIKNSWGQSWGENGYMKIQRNVETQGGLCGIAMKGSYPIA	57.41	8e-133	gi|460414499|ref|XP_004252606.1|	PREDICTED: KDEL-tailed cysteine endopeptidase CEP1-like [Solanum lycopersicum]	MA1513_1
5090	CotAD_37648	11486.9	0.243	2|1|1	4|1|4	1.31	0.003	0.308|0.691|0.045	CotAD_37648	MALQKAKDIISTNTVVVFSKSYCPFCVDVKQLLQKLGASFKAIELDKESDGADIQAALAEWTGQRTVPNVFIGGNHIGGCDSTTGLHNQGKLVPLLTEAGAFTKSSV	76.42	4e-58	gi|388510684|gb|AFK43408.1|	unknown [Lotus japonicus]	RC0267
5091	Cotton_D_gene_10030803	31443.7	0.107	3|1|1	18|7|8	2.23	0.02	0.001|0.002|0.001	Cotton_D_gene_10030803	MLFLLVLVSALIETSHAGGIAIYWGQNGNEGTLTATCATGRYAYVNIAFLNKFGNGRTPEINLAGHCNPASSGCTTVSQGIRNCQSRGIKVMLSIGGGVGSYSLASKADAKNVADYLWNNFLGGNSRSRPLGNAVLDGIDFDIELGSTQYWDDLARYLSAYSNNGRKVYLTAAPQCPFPDSFLGTALNTGLFDYVWVQFYNNPPCQYTSGNINNLVNSWNRWTSSIKAGNIFLGLPAAPAAAGSGYIPPNVLTSQILPVIKRSSKYGGIMLWSKFFDDKNGYSKSVVSSV	82.18	3e-162	gi|255545102|ref|XP_002513612.1|	hevamine-A precursor, putative [Ricinus communis]	VC1952_2
5093	CotAD_27039	41580.9	0.019	-|1|-	-|1|-	4.97	-	-|0.048|-	CotAD_27039	MEVVQVLHMNGGVGETSYAKNSLLQQKVITMTKPITEEAITKLYCSKYPEEIAIADLGCSSGPNTFFLVSELLKVVDSVRQKIGQKSPEYQVFLNDLPGNDFNTIFRSLSIFQNKLRKQLGPGNGPCFFTGVPGSFYGRLFRKNSLHFVHSSYSLHWLSQVPQGLESNKRNIYMASTSPPDVLKAYYVQFQKDFSLFLKCRSEELVDGGRMVLTLIGRRSDDPSSKECCYFWELLAMPLSDMLVEGLIEEEKLNSFNIPMYTPSPAEVKYEVVKEGSFNIDRLEVTEVNWNAYLDETDLSDAFKDGGYNVAKCMRAVAEPLLASYFGEEILDEVFRRYREIISDRLSKEKNEFVNVTVSLIKP	73.76	0	gi|224097038|ref|XP_002310820.1|	predicted protein [Populus trichocarpa]	-
5099	Cotton_D_gene_10013750	51393.1	0.127	4|5|4	8|11|7	1.45	0.011	0.005|0.040|0.016	Cotton_D_gene_10013750	MATSYPGPVQVGSYFVGQYYKVLGQQPDLLHQFYSDASTMIRVDGDSSESASSMLQIHTLAMSLNFTAIEIETINSLDSWNGGVLVMVSGSVKIKDFNGRRKFVQTFFLAPQDKGYFVLNDIFQFIDDETIYQHPASTLPEDKLDSKLNVSSPVAEPQVSDYALEEDFSEYAHIEDNPVDNYSIPEQPEQEAVEDEDPVEEAPTEEETLVSHHSVVNTVQEPPSIPLEEPVGEPPRRTYASILSVPKQQSASSAQVQPSYNKIPSSTSDWDQTPEYTNQQSRPAWSDVAESAAEIAVEEALVSEEGEYTGEYKSVYVRNLPSTVTATEIEQEFRNFGRIKPDGVFIRNRKDVVGVCYAFVEFEDILAVHNAIKASPIQFAGRQVYIEERRPNSTGTRGG…	61.93	3e-148	gi|255571190|ref|XP_002526545.1|	Ras-GTPase-activating protein-binding protein, putative [Ricinus communis]	-
5107	CotAD_50882	14118	0.305	1|1|1	13|8|7	1.84	0.001	0.001|0.002|0.020	CotAD_50882	MSWQAYVDDHLMCEIEGNHLSAAAIIGQDGSVWAQSASFPQLKPEEISAIMNDFNEPGSLAPTGLHLGGTKYMVIQGEPGAVIRGKKGPGGVTVKKTNMALIIGIYDEPMTPGQCNMIVERLGDYLLEQGL	94.62	3e-77	gi|302325341|gb|ADL18409.1|	profilin [Gossypium hirsutum]	-
5127	Cotton_D_gene_10014255	25999.5	0.154	1|-|-	1|-|-	7.17	-	0.023|-|-	Cotton_D_gene_10014255	MAESNVMVLGTWASPFVLRVKIALHLKSVNYENHEENLPESKSDLLLKSNPVYKKVPVLIHGHNPICESLIIVEYIDEVWTTSASSILPSDAYERAQSRFWAAYVEDKFSTALRRVLFGATEEDKRAAMAEVSEGMALLEEAFVKLSKGKAFFGGENIGFVDIVFGSLLAWIEVIEKLSEMKLISEIKTPGLVQWADCFSAHEAVKDVSPDVDKLVEFALKLGARVLKATAASN	59.74	3e-92	gi|462420804|gb|EMJ25067.1|	hypothetical protein PRUPE_ppa010831mg [Prunus persica]	PA0473
5134	CotAD_51448	29585.3	0.113	2|1|2	10|2|8	1.34	0.015	0.001|0.698|0.004	CotAD_51448	MASSLSTTPSAAFASVAKTTTALPNSTNLQLSTVSFRFSSRLNLRFFSKSLQHGQNSKAVVKAQLNEVAIDGSSNASAAPTIKSGAPTAEAKDAKTSSDVSPPAMATEESIAEFLNQVSSLVKLVDSRDIVELQLKQLDCELVIRKKEALPQPPSAAPVVMMQSPSQPPVMPPVPSVPALPPGQASAAPTPAPSLAASKSAKSSLPPFKCPMAGTFYRSPAPGEPPFVKVGDKVQKGQVLCIIEAMKLMNEIEADQSGTIVEILAEDGKAVSVDMPLFVIEP	95.56	7e-115	gi|155967399|gb|ABU41516.1|	biotin carboxyl carrier protein subunit [Gossypium hirsutum]	HI0971
5147	Cotton_D_gene_10014113	38606.8	0.341	3|3|1	4|6|2	1.2	0.009	0.001|0.128|0.019	Cotton_D_gene_10014113	MASDKKIKIGINGFGRIGRLVARVALQRNDVELVAVNDPFISTDYMTYMFKYDSVHGQWKHHDLKVKDSKTLLFGEKPVTVFGIRNPEEIPWAEAGAEFVVESTGVFTDKDKAAAHLKGGAKKVVISAPSKDAPMFVMGVNEKDYKPELDIVSNASCTTNCLAPLAKVIHDRFGIVEGLMTTVHAITATQKTVDGPSMKDWRGGRAASFNIIPSSTGAAKAVGKVLPALNGKLTGMSFRVPTIDVSVVDLTVRLEKSASYDEIKAAIKEESEGKLKGILGYVEEDLVSTDFVGDSRQVENNDFYCLSSIFDAKAGIALNKNFVKLVSWYDNEWGYSSRVIDLIVHMASTKAC	91.09	0	gi|157042763|gb|ABV02033.1|	glyceraldehyde 3-phosphate dehydrogenase [Nicotiana langsdorffii x Nicotiana sanderae]	CT505
5149	Cotton_D_gene_10002915	47510.4	0.093	1|-|-	2|-|-	1.61	-	0.001|-|-	Cotton_D_gene_10002915	MAMAMASVQLGRQTSIQDSPRSPEAKLGMQVEDLWDVQEPELSPNEKLNACFESIPVSAFPIAPQGIEIKSDASLAEAVQILAQNKILSAPVVDVDAPEDATWMDRYIGIVEFAGIAVWILQQSEPSSPRSPSSPNGAEFAIAANGMVSAAGLGALGPEDASITSGDFFEALTSSEFYKNTKVVRDISGSFRWAPFLALQKSNTFLTMLLLLSKYKMKSVPVLDLGDGKIDNIITQSAVIHMLAECTGLHWFESWGSKKLSEIGLPTMSPEHIITVYEDEPVLQAFKLMRKKRIGGIPVIECGRKKAIGNISLRDVQFLLTAPDIYCDYRSITAKNFLIAVRNYLEKHEKRSPMLSGMITCKRDETVKELIQKLDSEKIQRVYVTDEDGNLEGVITLRD…	77.73	0	gi|255540259|ref|XP_002511194.1|	AMP-activated protein kinase, gamma regulatory subunit, putative [Ricinus communis]	AF0848
5155	CotAD_01140	21375.2	0.04	-|1|1	-|5|5	1.56	-	-|0.017|0.021	CotAD_01140	MLRRASMLLARRPILAARARPFSTDLPAAPSADATFTEAWTKVIPNMDPPKTPLSFMQPRPPTPSSIPSKLTVNFVLPYASELATKEVDMVIVPATTGQMGVLPGHVATIAELKPGVLSVHEGSEVTKYFVSSGFVFIHANSFADIIAVEAVPLDRLDVNLVQKGLAEFTSKLSSATTDLEKAEAQIGIDVHSALNSALTG	99.44	3e-127	gi|242129050|gb|ACS83604.1|	ATP synthase delta subunit 3 [Gossypium hirsutum]	AGc4751
5160	CotAD_29382	30179.6	0.297	1|1|1	35|18|22	4.94	0.098	0.001|0.001|0.001	CotAD_29382	MESLAMGKKLPTSVLVGLLVASAITQTVLAQNCGCAPNLCCSQHGYCGQGNDYCGTGCKEGPCFSKSPTGASVASIVSPQFFNGIINQARADCAGKKFYTRQAFLTALDSFPDFGKLGSDVESKREIAAFFAHATHETEFFCYKEEQDKSNSYCEANPKFPCAPGKSYHGRGPLQLTGNTNYGNAGNALKLDLLKNPEMVANDPVVSFKGSLWYWMAAVRPVIGQGFGATIKAINGRLECGVPAAQDKVQRRIRFYTDYCKQLGVDPGPKLSC	59.93	4e-108	gi|224146530|ref|XP_002326040.1|	predicted protein [Populus trichocarpa]	STM0233
5167	CotAD_31250	71698.1	0.102	1|1|1	1|2|2	1.17	0.006	0.177|0.003|0.820	CotAD_31250	MELRTLQHHLLQGFMLLSLISNCYARFVVEKNSLTVTSPEKIKGTHDSAIGNFGIPQYGGSMAGVVVYPKENQKACKSFDDFGISFKSKPGSLPTFVLVDRGDCFFALKVWNVQQAGASAVLVADDIEEALITMDNPEEDSSSAKYIENITIPSALIEKTFGETLKKAISGGDMVNVNLDWREAVPHPDDRVEYELWTNSNDECGVKCDMLMAFVKDFKGAAQILEKGGYTQFTPHYITWYCPQAFTLSRQCKSQCINHGRYCAPDPEQDFSSGYEGKDVVIENLRQLCVFKVANETNRPWVWWDYVTDFQIRCPMKEKKYNKECADGVIKSLGLDAKRIEKCMGDPDADMENPVLKEEQDAQVGKGSRGDVTILPTLVVNNRQYRGKLAKGAVLKAIC…	87.23	0	gi|224105715|ref|XP_002313909.1|	predicted protein [Populus trichocarpa]	-
5168	CotAD_36290	23183.6	0.574	-|-|4	-|-|12	1.24	-	-|-|0.001	CotAD_36290	MEMSNDLDRLLFFEQARKISEATYASNPLDADNLTRWAGALLELSQFQSVPDSQKMIQDAISKLEEALSINPRKHDALWCLGNAQTSFAFLTNKEDEARPYFEKAAQYFQQAVDEDPSNDIYLKSLEISAKAPELHQEIIKHGLGQQTLGAGPSTSTSSNSTKTATKNKNSSDLKYDICGWIILAVGIVAWVGFAKSQMPPSPPPPPPR	72.86	6e-96	gi|225451445|ref|XP_002269795.1|	PREDICTED: mitochondrial import receptor subunit TOM20 [Vitis vinifera]	-
5178	CotAD_51387	62039	0.147	6|-|4	7|-|7	1.7	-	0.003|-|0.010	CotAD_51387	MKQSWILSVLLNLNRSSAVSANTPSKICHTFPGNGRCQRLSFKTKAAGSVEGNVLDKESASISDKIGLGINEARPHDKLPYRGVWLWVGSEMIHLMKLPNPEPLIRRPEHGGRDRHACISIRDVSKLQAILDKAGVYLKGYNAALKKEILILPHSPCHFKLVANDNAIGNGLEMLDGHKIHRSQNSLRISGSGTSLGVVNWSTHENVVVALSSEFPCQEVEDCNQQDDKKGLECLLQAWFLAQLDAIASNAGAEVNTSSAFQTSNQRGSFYSTSSMTEATKRYAVVTGANKGVGLEICKQLAQNGIMVVLTARDEKRGLEALESLKHSGLSDYLVFHQRDVADPKSIASLADFVKKQFGKLDILVNNAAILGATFSIAPGTEVNSRDIWSKATDDNYEL…	62.37	4e-120	gi|297745216|emb|CBI40296.3|	unnamed protein product [Vitis vinifera]	BH0316
5181	CotAD_47218	29059.7	0.656	1|1|-	4|1|-	2.1	-	0.004|0.213|-	CotAD_47218	MASTACFLHHHALTSAPRSSSPPPSTSQRQVAIVKSNQLLACISQKQAVQENDNSRSSAVISRRLALTLLIGPAVGSKVSPADAAYGEAANVFGKPKTNTEFIPYNGEGFKLSIPSKWNPSKEVEYPGQVLRYEDNFDSTTNVAVMVTPTDKKSITDFGSPENFLSKVDYLLGKQAYSGLTDAEGGFDSNAVATANILETSTPVIGGKQYYFLSVLTRTADGDEGGKHQLITATVNNGKLYICKAQAGDKRWFKGARKFVESAANSFSVA	77.86	6e-148	gi|356526942|ref|XP_003532074.1|	PREDICTED: oxygen-evolving enhancer protein 2, chloroplastic-like [Glycine max]	-
5188	Cotton_D_gene_10002061	18655.1	0.093	1|-|-	4|-|-	1.45	-	0.019|-|-	Cotton_D_gene_10002061	MVDSDTESGGGPNNASNADLSSPKEQDRFLPIANVSRIMKKALPANAKISKEAKETVQECVSEFISFITGEASDKCQKEKRKTINGDDLLWAMTTLGFEDYVEPLKVYLQRFREMEGEKTAVARDKDAPLAGGVGAAAAAGSSGMYGMMVHQQHQGHVYGSGGFHQMGRGPR	75.72	4e-87	gi|357495047|ref|XP_003617812.1|	Nuclear transcription factor Y subunit B-3 [Medicago truncatula]	ECU11g0730
5191	CotAD_31308	17032.4	0.168	2|2|1	11|5|6	1.17	0.008	0.004|0.759|0.082	CotAD_31308	MADPESPTAKDSAAPTTEPHHTQTQVDDTAAKLSNLTFKIWPPTQRTRDAVLNRLVETLSSESVLSKRYGTIPKEEASAAAKLIEEEAFSVAGASFSTDEDGIEILQVYSKEISKRMLDTVKARAAAATDSTPSGSAEVDSNNVGTAVGEEDSSSSVKAED	58.45	2e-37	gi|449447043|ref|XP_004141279.1|	PREDICTED: MFP1 attachment factor 1-like [Cucumis sativus]	-
5196	CotAD_01391	82084.1	0.085	-|-|1	-|-|1	1.31	-	-|-|0.014	CotAD_01391	MGFVIGSSCYLQTPISNCQLLFSSSSSSQSVFFNLRNAESKRRSRSFRPPMASLSHQDPNDHVSRKRRAVLLVGISILPFLQLRANAVEGSTLKNVTESELNKPEENQKAEEARGGSPSNPFLSFLNGLGIFGVSVLGPLYALLQKEKKETDQALESIKIKLKEKEAAIVSMEKDFESKLLNEREERTKQLKEAKEEKLSIMDQLNSANNTIAGLGQELKNEKRLIENLKVQIDSLQSNLLKAGEEKRSLEQELKEKLDLVGVLQEKVNLLSSELKDKEGNIQKLSSSIDEKESELKNVNTVYEKTKEELRKANSEIEGLKEELRRNQSELESKNAAVDELNARISSLTVEKDNSRQEFGALQEDYHNLKVSSENKVAADAKLLGEREKEIHLLKDQLE…	61.07	0	gi|224058829|ref|XP_002299637.1|	predicted protein [Populus trichocarpa]	-
5210	CotAD_58064	40603.5	0.133	1|1|1	4|5|6	2.65	0.029	0.117|0.053|0.028	CotAD_58064	MKVLSPILACLALAVVASHAALSPEQYWSYKLPNTPMPKAVKEILHPELMEEKSTSVNVGGGGVNVNTGKGKPAGGTHVNVGRKGVGVNTGKPGGGTHVNVGGKGVGVNTGKPGGGTHVNVGGKGGGVSVHTGHKGKPVNVNVSPFLYQYAASETQIHDDPNVALFFLEKDLHPGATMSLHFTENTEKSAFLPYQTAQKIPFSSNELPEIFNKFSVKPGSVKAEMMKNTIKECEQPAIEGEEKYCATSLESMIDYSISKLGKVDQAVSTEVEKQTPMQKYTIAAGVQKMTDDKAVVCHKQNYAYAVFYCHKSETTRAYMVPLEGADGTKAKAVAVCHTDTSAWNPKHLAFQVLKVEPGTIPVCHFLPRDHIVWVPK	98.94	0	gi|49615303|gb|AAT66913.1|	dehydration-induced protein RD22-like protein 2 [Gossypium arboreum]	-
5211	CotAD_45923	41680.1	0.513	-|1|1	-|2|2	1.02	-	-|0.678|0.036	CotAD_45923	MADEDIQPLVVDNGTGMVKAGFAGDDAPRAVFPSIVGRPRHTGVMVGMGQKDAYVGDEAQSKRGILTLKYPIEHGIVSNWDDMEKIWHHTFYNELRVAPEEHPVLLTEAPLNPKANREKMTQIMFETFNVPAMYVAIQAVLSLYASGRTTGIVLDSGDGVSHTVPIYEGYALPHAILRLDLAGRDLTDALMKILTERGYSFTTTAEREIVRDIKEKLAYVALDFEQELETAKSSSSIEKSYELPDGQVITIGAERFRCPEVLFQPSLIGMEAPGIHETTYNSIMKCDVDIRKDLYGNIVLSGGSTMFPGIADRMSKEITALAPSSMKIKVVAPPERKYSVWIGGSILASLSTFQQMWISKAEYDESGPAIVHRKCF	97.88	0	gi|242067527|ref|XP_002449040.1|	hypothetical protein SORBIDRAFT_05g003880 [Sorghum bicolor]	ECU04g1090
5235	Cotton_D_gene_10033927	57306.5	0.274	1|-|-	2|-|-	1.9	-	0.001|-|-	Cotton_D_gene_10033927	MDPYKHRPSSAFNSPFWTTNSGAPIWNNNSSLTVGPRGPILLEDYHLVEKLANFDRERIPERVVHARGASAKGFFEVTHDISQLTCADFLRAPGVQTPVIVRFSTVIHERGSPETLRDPRGFAVKFYTREGNFDLVGNNFPVFFIRDGMKFPDMVHALKPNPKSHIQENWRILDFFSHHPESLHMFTFLFDDLGVPQDYRHMEGSGVNTYTLINKAGKAHYVKFHWKPTCGVKCLLEEEAIKVGGSNHSHATQDLYDSIAAGNYPEWKLFIQTIDPDHEQRFDFDPLDVTKTWPEDILPLQPVGRLVLNKNIDNFFAENEQLAFCPAIVVPGIYYSDDKLLQTRVFSYSDTQRHRLGPNYLQLPANAPKCAHHNNHHEGFMNFMHRDEEINYFPSRYDP…	96.14	0	gi|211906480|gb|ACJ11733.1|	catalase [Gossypium hirsutum]	STM1318
5239	CotAD_56508	36740.5	0.053	1|1|1	4|3|3	2.13	0.78	0.001|0.040|0.053	CotAD_56508	MTVDAKIELPVIEFRSSDLERGTNGWHQLCKKVREACETFGCFEVVYDTISTEVRQEMFRLMKELVEVPVERKQKNVLPPPSPGWVGPGSHVSPLYEGFGLGDVSNYDSVKNFAQLMWPEGHPRFCDTAHTMGTQLEVLNKLIWLMLIDSYGLGDDSLKMNYTTFMRMMKYMPPPPGENEIGFFAHTDKLVSTLICENQIPGLEIEVNDGQWIRMTNLSPSSFVFVVGDALMAWSNGRLKAAKHRVLIKGDKDRFSIAAFILPNKGTIIKIPKELIDEQHPRIFKDLDFMEFYSLAFSDPTKSRDSGQLLHKFAALSPPVSN	47.34	3e-103	gi|470110454|ref|XP_004291498.1|	PREDICTED: gibberellin 3-beta-dioxygenase 3-like [Fragaria vesca subsp. vesca]	SPAC25B8.13c
5248	CotAD_10469	26798.6	0.207	4|-|-	16|-|-	1.23	-	0.001|-|-	CotAD_10469	MASMSFSATIPSPLLDFSQTKKNPVFSSSWPSMSFSIPSIKSSLGSSKSAFFQNGFSLPSLTASGFVFNSRSSGIYARAATDKTLYDYTVKDIDGKDTPLGKFKGKVLLIVNVASRCGLTTSNYSELSHIYDKYKNQGFEILAFPCNQFGGQEPGSNPDIKKFACTRFKAEFPIFDKVDVNGPNTAPVYQFLKSSAGGFFGDLIKWNFEKFLVDKNGKVVERYPPTTSPFQIEKDIQKLLAT	79.84	3e-125	gi|462420710|gb|EMJ24973.1|	hypothetical protein PRUPE_ppa010584mg [Prunus persica]	STM1341
5255	Cotton_D_gene_10012530	13790.4	0.262	3|3|2	21|28|25	1.33	0.002	0.001|0.001|0.001	Cotton_D_gene_10012530	MAYAAMKPTKPGLEEPQEQIHKIRITLSSKNVKNLEKVCADLVRGAKDKRLRVKGPVRMPTKVLHITTRKSPCGEGTNTWDRFELRVHKRVIDLFSSPDVVKQITSITIEPGVEVEVTIADS	99.18	3e-85	gi|225455513|ref|XP_002265347.1|	PREDICTED: 40S ribosomal protein S20-2 isoform 1 [Vitis vinifera]	HP1320
5256	CotAD_40644	55935.1	0.384	1|1|1	3|3|1	1.65	0.276	0.694|0.056|0.001	CotAD_40644	MARSVCVWFALAAIVCSLSAISAEESSESKEFVLTLDHSNFTDTVSKHDFIVVEFYAPWCGHCKHLAPEYEKAASILSKHDPPIFLAKVDADDEANKDLASQYDVKGYPTLQILRNGGKNVQEYKGPREADGIVEYLKKQSGPASVEIKLTEDASNLIDDKKIVIVGVFPKFSGEEFESYMALAEKLRSDYDFGHTLDAKHLPRGESSVVGPLVRLFKPFDELVVDFKDFKPEALEKFIEESSIPLVTLFNKDPSNHPFVAKFYNCPNAKAMLFADLSTEGFDSLQSKYREVAEQYKGKGISFLLGDVEASQAAFQYFGVEESQVPLIIIQSDDGKKYFNPNLKADDIAPWVKDFKEGKVAPYVKSEPIPKENNEPVKVVVADTLQDMVFKSGKNVLLE…	99.6	0	gi|133902323|gb|ABO41851.1|	putative protein disulfide isomerase [Gossypium hirsutum]	jhp0763
5259	CotAD_06563	39191.2	0.245	5|4|6	29|18|24	1.4	0.006	0.001|0.001|0.001	CotAD_06563	MARLTLVSSIILLLCSVAAGSTFEDSNPIQMVSDGLSGFESSVLRVIGHTRHALSFARFAYKHGKRYENVEEMKLRFQIFKGNLDLIRSTNKKGLPYTLAVNQFADWSWEEFQKHRLGAAQTGSATTKGNHQLTDVVLPDSKDWRRVGIVSPVKDQGSCGSCWTFSTTGALEAAYHQAFGKGISLSEQQLVDCAGAFNNFGCNGGLPSQAFEYIKYNGGLDTEESYPYTATNGLCKFSSENVGVKVLDSVNITLGAEDELKHAVAMVRPVSVAFEVVTSFRFYKSGVYTSKTCGSTPMDVNHAVLAVGYGVENGVPYWLIKNSWGAEWGDNGYFKMEMGKNMCGVATCASYPIVA	81.07	0	gi|224069140|ref|XP_002326284.1|	predicted protein [Populus trichocarpa]	MA3430_1
5263	CotAD_64442	34471.2	0.108	2|2|3	2|3|9	1.38	0.016	0.633|0.138|0.001	CotAD_64442	MAGRSRTNVPATIYKDFQPLIQRKDEQGSYVLVINLPASGIEKQRGQKVPSPPPKTVSEPKPPMATTAPQAQTAVTSTSGVEKLRDQKVPSPPPKAVAEPKPQMATAVLQAQTAVASDSSIEKQRDQKVPSPPKAVTEPKPPMATAAPQSQTAAASPQKQAKGKKKVEALPPLKKQEETQKKVYPIGDNTTKQAEEKSTGGSGPTTSTTPGIVDKKGETETKDGLKDLVKEQKTKDSMSEASVPKASEKAGVEKKPQEGGGGLLEKAKEMRGMDRIMKSVKRLTSDEDEDRQLLINIGVSVLVIVALGAYITYSYRSSGKAKH	58.7	9e-08	gi|224097524|ref|XP_002310972.1|	predicted protein [Populus trichocarpa]	-
5268	CotAD_52125	37647.9	0.119	3|2|1	6|5|2	1.33	0.054	0.003|0.105|0.836	CotAD_52125	MMAIKSHHCCLSFIFLLLPLLLQLHSVKGNLQLNYYAQSCPNAEEIIKQQVIKLYNKHGNTAVSWVRNLFHDCMVKSCDASLLLETVNGIESEQKSDRSFGMRNFKYVKTIKDALEQECPRTVSCADIVSLSARDGIVLLGGPRIEMKTGRKDSKRSYLPEVENTIPNHNDSMELVLSRFQSIGIDTQGVVALLGAHSVGRVHCVNLVHRLYPTVDPTLEPDYAEYLKGRCPTPDPDPEAVLYSRNDRETPMILDNMYYKNLLKHKGLLVIDQQLTSDPTTSPFVEKMAADNGYFHDQFARAVLLLSENNPLTGDEGEVRKDCRYVNSE	82.15	0	gi|225626263|gb|ACN97181.1|	peroxidase [Populus trichocarpa]	YKR066c
5269	CotAD_55027	36517.9	0.208	2|1|1	6|2|2	1.11	0.009	0.857|0.208|0.027	CotAD_55027	MASQLVGTKRACVVGGSGFVASLLVKLLLEKGYAVNTTVRDPDNQKKISHLVTLQELGDLKIFQADLTDEGSFDAPIAGCDLVFHVATPVNFASEDPENDMIKPATQGVVNVLKACAKAKTVKRVVLTSSAAAVSINTLDGTDLVMTEKDWTDIEFLSSAKPPTWGYPASKTLAEKAAWKFAEENNIDLITVIPSLMTGPSLTPIVPSSIGLATSLISGNEFLINALKGMQMLSGSISITHVEDVCRAHVFLAEKESASGRYICSAVNTSVPELAKFLNKRYPDFKVPTDFGDFPSKPKLIISSEKLISEGFSFKYGIEEIYDQTVEYLKSKGLLK	99.7	0	gi|121755809|gb|ABM64802.1|	anthocyanidin reductase [Gossypium hirsutum]	BMEII0259
5270	Cotton_D_gene_10015238	17964.7	0.226	2|3|2	5|6|7	1.32	0.001	0.019|0.019|0.001	Cotton_D_gene_10015238	MGSSASSQRPENNNAVQDINGASLAETAAVDYTSLSDEEWKKRLTPEQFYITRQKGTERAFTGEYWNTKTPGTYHCICCDTPLFKSLTKFDSGTGWPSYYQPIGKNVQSKLDLSIIFMPREEVLCATCGAHLGHVFDDGPPPTGKRYCINSASLKLKPE	81.25	4e-92	gi|225461830|ref|XP_002285647.1|	PREDICTED: peptide methionine sulfoxide reductase B1, chloroplastic-like isoform 1 [Vitis vinifera]	mll4820
5272	CotAD_22472	23288.5	0.234	1|2|1	4|5|4	3.86	0.49	0.055|0.001|0.001	CotAD_22472	MFGHLGKKIEASATNEPVLDIDGNEVQTGTPYYVVSSIWGGGGGGLALGRPSGNPCPEVVTQRKSSVDNGIPVIFSNSDSNDRVVRLSSDINIEFIRLRPNICRTTTVWKVDDYDHSAGKWWVVTNGVKGNPGANTLTSWFRIETERSPFYTFKYCPAVCGTCPALCNEIGKYTDGEMVRFALSTSPGWSFYFKKVKKSATEIQQVVHI	58.29	3e-75	gi|55139090|gb|AAV41233.1|	putative 21 kDa trypsin inhibitor [Theobroma bicolor]	-
5283	CotAD_73422	27868.7	0.195	-|3|3	-|11|15	1.29	-	-|0.001|0.001	CotAD_73422	MAFLSKIGSILRQTTSMHVNAKLSASGPGLFQVLRSMSTSPSSKLFVGGISFQTDDQSLREAFSKYGEVIDARIIMDRETGRSRGFGFVTYTSSEDASSALQALDGQVLHGRQVRVNYANERPPRNFGGGGFNSGYGGGGYGGGGGGYGGGSGGYGGGGGGYDRNDGFSSGNYGGNVGYGNTGGSSYGGQGSYGGGNNYGTGGVSYGSDFGQSGVDGGNFNVGGSDSFATGGSTGYGGDSMGFGGGEDGYKGAYDGNDALNDNSRDEDESGDFVKRA	72.36	6e-59	gi|255633638|gb|ACU17178.1|	unknown [Glycine max]	SPAC19A8.13
5288	Cotton_D_gene_10022003	32419.2	0.116	2|1|1	4|4|3	1.42	0.014	0.190|0.101|0.043	Cotton_D_gene_10022003	MAFGLSSIFVITIFAISFTNLASVSLVLARKPCRFPAIFNFGDSNSDTGGLSAAFGQAPPPNGFSYFGAPAGRYTDGRLLIDFIAESLGLPYLSAFLDSVGTNFSHGANFATAGSTIRPQNTTLQQSGFSPISLNVQFYEFNDFHARTQVVRKRGGVFEILMPKKEHFSNALYTFDIGQNDLTAGYFSNMSTDDVKAYVPDYIYNQGGRYFWIHNTGPVGCLPYVMERIPVLAGQIDDYGCASPFNEVAQFFNRGLKKIVEQLRKNLPHAAITYVDVYSVKYSLISQGRKHGE	70.81	4e-152	gi|224107753|ref|XP_002314590.1|	predicted protein [Populus trichocarpa]	-
5293	CotAD_09678	94759.6	0.144	-|2|2	-|3|6	1.23	-	-|0.380|0.004	CotAD_09678	MAINSNFKLPIMWNAFLVALLASWVCSVTASVSYDRKAITINGQRRILISGSIHYPRSSPEMWPDLIQKAKEGGLDVIQTYVFWNGHEPAPGMYNFEGNYDLVKFIKLVKQAGLYVHLRIGPYVCAEWNFGGFPVWLKYIPGINFRTNNRPFKAQMQRFTEKIVGMMKAERLFESQGGPIILSQIENEYGPMEYELGAPGKAYSDWAAKMAVGLGTGVPWVMCKQDDAPDPIINTCNGFYCDYFSPNKAYKPKMWTEAWTGWYTEFGGAVPYRPAEDMAFAVARFIQKGGAFINYYMYQGGTNFGRTAGGPFIATSYDYDAPLDEYGLKRQPKWGHLKDLHRAIKLCEPALVNGDPTVIRLGNYEEAHVFNYKTGGCAAFLANYNPNSYAKVAFRNMHY…	86.48	0	gi|118488890|gb|ABK96254.1|	unknown [Populus trichocarpa x Populus deltoides]	PH0511
5301	CotAD_13268	11552	0.729	5|-|4	20|-|27	1.52	-	0.001|-|0.001	CotAD_13268	MALQKAKDIVSTNPVVVFSKSYCPFCVDVKQLLQQLGASFKAIELDRESDGSDIQAALAEWTGQRTVPNVFIGGKHIGGCDSTMALHKEGKLVPLLTEAGAITKSSV	80.19	7e-61	gi|156891145|gb|ABU96710.1|	glutaredoxin [Solanum tuberosum]	HI0572_2
5306	Cotton_D_gene_10039301	41355.4	0.293	-|-|3	-|-|9	2.78	-	-|-|0.001	Cotton_D_gene_10039301	MSLFLFMLLVSILNPVVSHKSCDFPAVFNLGDSNSDTGGYASAFTPPTSPYGDTYFHMPARRFSDGRLTVDFIAEAFGLPFINAYLDSVGTNFSHGINFATAASTIRLPISVIPNGVFSPFYLGFQYSQFEQFKVRSQMIRKQGGLLAGLMPKEEYFSKALYTFDIGQNDLAEGFFSNLTIQEVNASIPDIINKFSANIKNIYNLGARFFWVHNTGPIGCLPYVLIAFASAEKDPAGCLKPYNEVAQYFNLKLQESIAQLRNEFPSAAFTYVDIYSVKYSLFAEPQKHGFELPLVTCCGYGGEYNYSAAVLCGGTITVNGTEIFVGSCDNPSVRVVWDGIHFTEAANKFIFDQISTGSFSDPAVPLKQACQS	69.92	0	gi|224084882|ref|XP_002307434.1|	predicted protein [Populus trichocarpa]	all3634
5313	CotAD_57173	35937.1	0.237	5|1|3	11|1|7	1.22	0.003	0.068|0.263|0.016	CotAD_57173	MEALLCKKLGDPASASVGNESEPSSSPIEVIRNYPIPQLNSPTAVRVKVKATSLNYANYLQILGKYQEKPPLPFIPGSDYAGTVDAVGPAVTKFKVGDHVCSFAALGSFASFIVQDQSLLFGLPKGCDLVAAAALPVAFGTSHVLLVLGAAGGVGFSAVQIGKVCGAVVIAAARGAEKVQFLKSLGADHVVDLTNQNLTASVKGFLKSRKLKGVDVLYDPVGGKLTKESMKLLNWGAQILVIGFASGEIPVIPANITLVKNWTVHGLYWGSYSIHRPAVLEDSIQESISWMEKGLITIHISHTYSISEANLAFSALRDRKAIGKVMIVFDDMGRSKL	72.73	3e-166	gi|462414701|gb|EMJ19438.1|	hypothetical protein PRUPE_ppa008009mg [Prunus persica]	Rv0149
5329	CotAD_38978	22250	0.142	-|-|1	-|-|1	2.74	-	-|-|0.001	CotAD_38978	MAEEHTKVGGEEAVESKERGMFDFLGKKEDEKPQPQEEVVATQFEKVKIEEEHKEDEKKHSLLDKLHLSNSSSSSSSDEEEGEGGEKKKKKKKEKGKKEQDSAVPVEKCDEAATVHHSETPEKKGFMDKIKDKLPGQHKKDEEDTTQPPAAAAPTENDHHEGETKEKKGFLVKIKEKIPGYHSKTEDEKEKETTAPH	59.76	5e-17	gi|349844870|gb|AEQ19904.1|	dehydrin 2 [Vitis yeshanensis]	-
5334	CotAD_68507	43022.7	0.188	5|5|5	22|14|20	1.47	0.004	0.001|0.001|0.001	CotAD_68507	MPSLFGSNPSSSDPANDTVPSPSSSCSSSLDMWNYFFVPILLCLTKELSLAKAQTSTGLLLPSQRGDGSADDSLISFSSCANADPKLYYRPVIGILSHPGDGASGRLNNDTNASYIAASYVKFVEAAGARIIPLIYNEPEEILFQKLELVNGVLFTGGWSKYGLYYDIAKKIFKKVIEKNDRGDHFPLYAICLGFELLTMIISEDKNILEPFSASNQASSLQFVENVNIEGTVFQRFPPNLLQKLGTDCLVMQNHRYGISPEKLQNTPNLSRFFKILTTSTDKNNKVYVSTAQAHGYPVTAFQWHPEKNAFEWGLPMIPHSDDAIEVTQHVANFLIREARRSLNRPAAQKVLDNLIYNYSPTFCGKAGRGFDEVYIFTQRQARI	76.22	0	gi|462409755|gb|EMJ15089.1|	hypothetical protein PRUPE_ppa006962mg [Prunus persica]	-
5350	Cotton_D_gene_10014205	14517	0.273	3|3|3	12|7|8	1.39	0.004	0.051|0.004|0.008	Cotton_D_gene_10014205	MQAALSLAPSPLSIVTKPLFPPCKSMLKLQTPRGFKATPVGQDNSTVDYSSTASVFPAEACDTLGGEACDVEMFPEVKLKPDQTQSNKGKTGSEQVDREYLEYNSPKTVFIGEACDDLGGEFCEPEYQKGVQ	61.36	3e-53	gi|255543196|ref|XP_002512661.1|	Light-regulated protein precursor, putative [Ricinus communis]	-
5359	Cotton_D_gene_10015677	17401.7	0.239	2|2|3	7|9|18	1.66	0.041	0.006|0.001|0.001	Cotton_D_gene_10015677	MGVVSYEFEVTSPIAPARLFKAFVLEAAKVWPTAAPHAVKSVELEGDASPGSIVKITFVEGLPYQYMKHQIGGHDENNFSYSYSMIEGGPLGDKLEKISYENQFVAAADGGSICKSSIKYYTTGDYVITEDEIKTLIKGSEVVYKAIEAYLLANPDACN	98.74	1e-113	gi|15811629|gb|AAL09033.1|AF416652_1	ribonuclease-like PR-10 [Gossypium arboreum]	-
5361	CotAD_55892	17686	0.309	-|3|1	-|6|2	1.2	-	-|0.049|0.741	CotAD_55892	MTTVHATTATQKTVDGPSMKDWRGGRGAGQNIIPSSTGAAKAVGKVLPELNGKLTGMAFRVPTPNVSVVDLTCRLQKSASYEDVKAVMKYAAEGPLKGILGYTDEDVVSNDFVGDSRSSIFDAKAGIGLSKSFMKLVSWYDNEWGYSNRVLDLIEHIALVGATRD	94.59	8e-99	gi|255544534|ref|XP_002513328.1|	glyceraldehyde 3-phosphate dehydrogenase, putative [Ricinus communis]	CT505
5370	CotAD_20520	51204.6	0.143	7|5|7	27|21|42	1.26	0.001	0.001|0.001|0.001	CotAD_20520	MGGGAAAAPIPRLTAIAFLFLLPIVIQSHTPSISVRDFGATGDGKHYDTAAIQSAIGSTYLTATIFLKSNVILDIPKGSTILGGTKLEDYPKEFDRWYVILAENARDVGITGGGVVDGQGLEFVVKFDERKNVMVSWNQTGACSGDECRPRLVGFLDSTNVRVWNVTFRQPAYWCLHIVRCENTSIHDVSIYGDFNTPNNDGIDIEDSNNTVITRCHIDTGDDAICPKTYTSPLYNLTATNSWIRTKSSAIKLGSASWFELNNLVFDNITIVDSHRGLALQIRDGGNVSDITFSNINISTRYYDPSWWGRAEPIYVTTCPRHSNSSEGSISNLNFVNISAVSENGIFLSGSKGGLLRNLRFININLTYKRWTKYMGGLVDYRPGCQGLVNHSTAGIIME…	77.6	0	gi|224137954|ref|XP_002322693.1|	predicted protein [Populus trichocarpa]	AGl3361
5373	CotAD_72968	45728.3	0.043	2|1|1	4|3|5	1.55	0.062	0.046|0.015|0.594	CotAD_72968	MGTYDPFLVGLYYTKVQLGSPPREFHVQIDTGSDVLWIGCNSCNGCPQSSGLQIQLNLYDPGSSSTASLVSCSDQRCSAGLQSSDSGCSGQSNQCSYTFQYGDGSGTSGYYVADSLHFNSILEGSVITNSTAPIMFGCSVLQTGDLTKSDRAVDGIFGFGQQSLSVISQLSSEGITPKVFSHCLKGSNSGGGILVFGEILEPNMVYTPLVPSQPHYNLDLRSISVGGQVLSINPSVFSTSNNQGTIVDSGTTLAYLADEAYDAFMSAITNAVSQTVRPILSKGNQCYLITSSVNDIFPQVSLNFAGGASLILNPQDYLVQQNSIGGSASWCIGFQKIQGQRITILGDLVLKDKIFVYDLVNQRIGWTNYDCSMSVNVSTNINTGRTEFVNAGQMSNDGS…	77.31	0	gi|224104765|ref|XP_002313558.1|	predicted protein [Populus trichocarpa]	-
5377	CotAD_23669	28897.6	0.08	2|2|1	18|16|18	1.14	0.03	0.908|0.352|0.001	CotAD_23669	MALSMASTSLSSFSIIRIQPEKLFSRKVTTLLRGETRTKATKGGVSSVCEPLPPDRPLWFPGSTPPEWLDGSLPGDFGFDPLGLGSDPETLKWFAQAELMHARWAMLAVAGILIPELLESLGFIDNFSWYDAGSKQYFADPTTLFVVQMALMGWVEGRRWADIIKPGSVDIEPNLPNKKKPTPDVGYPGGLWFDPLMWGRGSPEPVMVLRTKEIKNGRLAMLAFVGFCFQAIYTGEGPIENLMAHIADPGHCNVFSAFTTH	83.81	6e-155	gi|255550389|ref|XP_002516245.1|	chlorophyll A/B binding protein, putative [Ricinus communis]	-
5381	CotAD_50552	50359.7	0.246	7|2|2	14|6|5	1.66	0.009	0.001|0.001|0.006	CotAD_50552	MSALHFTVTFLLPTLLLEVNKAKSQSFIGVNYGQHADNLPSPAATAKLLQSTSIQKVRLYGSDAAMIKALANTGIGIVIGTANGDIPALASDPNFAKNWVDTNVVAYYPASKIILINVGNEVIMSGDNNLISQLLPAMQNVKNALDAASLGDKVKVSTVHSMTLLKQSEPPSSGSFDPAYGDMLKGVLAFNNATASPFAINPYPFFAYRSDPRPETLAFCLFQPNSGRLDGNTKINYMNMFDAQVDAVRAALDAMGFKNVEIVVAETGWPYKGDSDEVGASIENAKAYNGNLIAHLRSMVGTPLMPGKSVDTYLFALYDENLKSGPTSERSFGLYQSADLTMTYDVGLSKSSSQAQTPASPATEKTPATPSAVAPSPEPKKASWCVPKKDVTDSELQAS…	75.94	0	gi|255538616|ref|XP_002510373.1|	Glucan endo-1,3-beta-glucosidase precursor, putative [Ricinus communis]	-
5388	CotAD_66058	84096.6	0.144	-|1|1	-|2|2	2.65	-	-|0.003|0.100	CotAD_66058	MAKSVLFPLLFITTTVFLGFFISSAESRPPFACDPRNGLTRSLKFCRANLPIHVRARDLIGRLTLAEKIRLLVNNAAAVPRLGIQGYEWWSEALHGVSNVGPGTKFGGAFPGATSFPQVITTAASFNESLWEQIGRVVSDEARAMYNGGMAGLTYWSPNVNIFRDPRWGRGQETPGEDPVLAGKYAANYVRGLQSTTGIRLKVAACCKHYTAYDLDNWNGVDRYHFNARVSKQDLADTYDVPFKSCVVEGKVASVMCSYNQVNGKPTCADPDLLKGTIRGQWGLSGYIVSDCDSVGVMYDTQHFTATPEESAAAAIKAGLDLDCGPFLAIHTDLAVRRGLLAEADVDLALANTITIQMRLGMFDGEPSAQPYGNLGPRDVCTPAHQQHALEAARQGIVL…	81.99	0	gi|255556320|ref|XP_002519194.1|	Periplasmic beta-glucosidase precursor, putative [Ricinus communis]	lin1840
5391	CotAD_18174	53021.1	0.172	4|6|5	22|24|22	1.49	0.006	0.001|0.001|0.001	CotAD_18174	MAAASSNHFLLSFSLFLSFLFTSTLARLSPQTTTTTLDVSSSLSQAQHILSFDPQSLKAFAQTQTQPLFFNSSTSAAVFSVPLHSRGSVHKTHHTDYKALVASRLDRDSARVDSLSTKLLLALNGVKKSQLRPLPTQIQAEALSTPIISGTSQGSGEYFSRVGVGKPAKQFYMVLDTGSDINWIQCEPCNECYQQSDPIFNPSGSSTYSPVTCESKQCSSLEVSACRSGKCLYQVSYGDGSYTVGDFVTETVSFGNSGNMNGVALGCGHDNEGLFVGAAGLLGLGGGPLSLTSQIKATSFSYCLVDRDSTGSSTLDFNSGLPADSVIAPLMKSRKVNTFYYIGLTGFSVGGQAVNISPGLFEINEAGEGGVIIDCGTAITRLQTQAYNALRDAFVKQTQ…	70.67	0	gi|462405674|gb|EMJ11138.1|	hypothetical protein PRUPE_ppa004726mg [Prunus persica]	-
5403	Cotton_D_gene_10030566	29958.9	0.046	1|1|1	5|4|2	2.98	0.107	0.001|0.109|0.006	Cotton_D_gene_10030566	MAEKQYSADVVVEGLRKILISEEVRLDEEVQSKVEKLIAELQGREHHHHPPCDHDAQRLDDGFHFFKTNIFDKNRECFEKLAEAQHPKFLVISCSDSRVSPSVVLNFKPGEAFAGRNIANMVPQFDQLRHTEIGSVIEYAVKELQVDNILIMGHSSCGGIKRLMSLPDQTQTYDFIDEWVKIGLPAKKKVLEEAGDLPCEQQITLCEKESVKNSMGNLLTYPFVRSAVVNGTLTLRGGYYDFVNGDFEQWKMCTKPCHPQ	57.71	7e-94	gi|297733779|emb|CBI15026.3|	unnamed protein product [Vitis vinifera]	XF0880
5404	CotAD_02530	29717.8	0.132	1|1|-	18|11|-	2.13	-	0.001|0.004|-	CotAD_02530	MASSFSKFSQTLLLLVVFWGITSSSNAQLSTDYYSKSCPNLFSTVKFTVHSAIMKEARMGASLLRLFFHDCFVNGCDGSLLLDDTSSFTGEKNAVPNRNSARGFDVIDDIKSAVENVCPGVVSCADILAIAARDSVKLLGGPNWDVKLGRRDARSASRAAANNGITAPTSKTKQSNCPRSSGSGDNNLAPLDIQTPTYFDNKYFNNLIGKRGLLHSDQELFNGGSTDSIVRAYSKNPSSFSSDFVTAMIKMGDISPLTGSKGEIRKNCRRVN	66.25	4e-140	gi|356509058|ref|XP_003523269.1|	PREDICTED: peroxidase 52-like isoform 1 [Glycine max]	-
5405	Cotton_D_gene_10031702	24420.2	0.46	1|1|1	34|32|42	1.17	0.006	0.001|0.012|0.001	Cotton_D_gene_10031702	MSLTIPTNLSKSILKPKLETQVIPKASSRSLIVCSSSNPSSDKSASPLQAFSAALALSSILLSAPLPAVADIAGLTPCKESKQFAKREKQQIKKLESSLKLYGPDSAPALAIKATIEKTKRRFDNYGKYGLLCGSDGLPHLIVSGDQRHWGEFITPGLLFLYIAGWIGWVGRSYLIAISDDKKPAMKEIIIDVPLATGLIFRGFIWPVAAYRELINGDLVVKDV	76.55	5e-111	gi|224057968|ref|XP_002299414.1|	hypothetical protein POPTRDRAFT_709002 [Populus trichocarpa]	-
5408	Cotton_D_gene_10010899	22102.4	0.319	3|1|1	162|2|195	1.4	0.06	0.001|0.155|0.001	Cotton_D_gene_10010899	MLHIFLLFSLIFTSTNVLAQDFCVANTASGIVTPSGYPCIMEANVTSDDFAFSGLGAPGNTSNIISAAVTPAFVGQYPAVNGLGLSAARLDLAPGGVIPMHTHPGANELLYVVHGHITCGFISSANKVYLKTLKRGDVMVFPQGLLHFQINAAGKRPSLAIVTFSSPNPGLQILDFALFANDLPSSLLEKSTFLDDAQVKKLKGVLGGTG	72.04	3e-93	gi|224073704|ref|XP_002304135.1|	predicted protein [Populus trichocarpa]	sll1358
5416	Cotton_D_gene_10015341	26826.6	0.207	-|4|5	-|22|30	1.28	-	-|0.001|0.001	Cotton_D_gene_10015341	MASMSFSATIPSPLLDFSQTRKNPVFSSSWPSMSFSIPSIKSSLGSSKSAFFQNGFSLPSLTASGFVFNSRSSGIYARAATDKTLYDYTVKDIDGKDTPLGKFKGKVLLIVNVASRCGLTTSNYSELSHIYDKYKNQGFEILAFPCNQFGGQEPGSNPDIKKFACTRFKAEFPIFDKVDVNGPNTAPVYQFLKSSAGGFFGDLIKWNFEKFLVDKNGKVVERYPPTTSPFQIEKDIQKLLAT	79.42	6e-125	gi|462420710|gb|EMJ24973.1|	hypothetical protein PRUPE_ppa010584mg [Prunus persica]	STM1341
5424	Cotton_D_gene_10004861	32021.7	0.181	3|4|4	9|15|14	1.96	0.023	0.001|0.002|0.001	Cotton_D_gene_10004861	MRTSLLLLSALISFVMVASAANFNQDIDVTWGDGRGKILENGNLLTLTLDKFSGSGFQSKNQYLFGKIDMNIKLVPGNSAGTVTTYYLRSEGSTWDEIDFEFLGNLSGDPYTVHTNVYTQGKGDKEQQFYLWFDPTKDFHTYSLLWNPQRIIFSVDGTPIREFKNLESMGVAFPKSQPMRVYSSLWNADDWATRGGLVKTDWSQAPFTAAYRNYKADACVWSSGKSSCVPPPPSQNAWLSQELDITSQERLKWVQKNYMIYNYCTDTKRFPQGLPKECTAP	77.74	9e-168	gi|449457143|ref|XP_004146308.1|	PREDICTED: probable xyloglucan endotransglucosylase/hydrolase protein 23-like isoform 2 [Cucumis sativus]	YEL040w
5441	Cotton_D_gene_10017814	19284.9	0.38	5|2|4	13|4|12	1.34	0.011	0.001|0.040|0.001	Cotton_D_gene_10017814	MFLRMISRPLLAKVKETTGIVGLDVVPNAREVLIGLYNKTLKEIQAVPEDEGYRKAVESFTRHRLKVCQEEEDWEMIEKRLGCGQVEELIEEARDELTLIGKMIEWDPWGVPDDYECEVIENDAPIPKHVPQHRPGPLPEEFYKTLEALSKKDEPKVTSGYPQIKE	86.75	7e-105	gi|255545146|ref|XP_002513634.1|	NADH dehydrogenase, putative [Ricinus communis]	-
5443	CotAD_20698	48940.9	0.352	2|2|1	21|17|16	1.38	0.004	0.001|0.001|0.001	CotAD_20698	MSTIISFNCCSSLTASKLINPRIPTKGSSFLSTHKSFSWWNRHFLPKCTSQKHVQCQLQNGQECAISVALAAGLIIGMPSLDSSPMAYAANPSLPDLSVLISGPPIKDPGALLRYALPIDNKAIREVQKPLEDITESLKVAGVRGLDSVERNVKQASRSLKQGKSLIISGLAESKKDHGVELLDKLEIGMEELQQIVEGRNRDAVAPKQKELLKYVGDVEEDMVDSFPYEVPEEYRSMPLLKGRAAVDMKVKVKDNPNLEECVFHIVLDGYNAPVTAGNFLDLVQRHFYDGMEIQRADGFVVQTGDPEGPADGFIDPSTEKTRTIPLEIMVDGEKAPVYGSTLEELGLYKAQTKLPFNAFGTMAMARDEFENNSASSQVFWLLKESELTPSNANILDGR…	79.42	0	gi|462411531|gb|EMJ16580.1|	hypothetical protein PRUPE_ppa005738mg [Prunus persica]	FN1800
5453	CotAD_00905	59963.3	0.136	3|2|1	5|4|5	3.39	1.419	0.125|0.001|0.002	CotAD_00905	MKASSYTCFIVSIFVLFSISSAASYDPVDFDAFLQCLPKHSDHSVSIAGAILTPNNASFQSIYQLRANNLRVLLSATSRPVAIITALHPSHAQAAVICAKRHGFQLRIRSGGHDYEGLSYISDVPFVILDMFNLKSIDIDMKTETAWVQAGATTGELYYSIAKTSEVHGFPSGVCTTLGIGGHFSGGGYGFLIRKYGLSIDNVIDAQLIDAKGQILDRKSMGEDVFWAIRGGGTTSFGIILSWRIKLVRVPPRVTVFNVQRTLEQGATELAYRWQQVAPKLPKDLFIRLQPVPINNGGNNKTVSVSFIGHFLGQADELLRLMNVRFPELGLTRNDCSEMSWVESALSWAGFPNGTSIDVLLNRVQVDRVFYKSKSDYYKAVIPKQGLETLWQVLMDIED…	61.69	0	gi|255578041|ref|XP_002529891.1|	Reticuline oxidase precursor, putative [Ricinus communis]	Rv1774
5466	CotAD_66857	30765.5	0.24	-|5|-	-|15|-	1.23	-	-|0.001|-	CotAD_66857	MAVVDCPSIRMAGPAPFVDLGKKAKDLLTKDYNFDQKFTLSMLSTTGMGLTATGLKKDQNFFGDINTVYKSGSTTVDMKVDTYSNVSTKVTVNDVWPCSKAALSFRIPDHKSGKLDVQYLHPHAAIDSSIGLNPTPLLELSATIGSKELALGGEIGFDTASASFTKYTAGINMNKPDFSVALLLTDKGQALKASYIHSVNPFTCVAAEMAHRFSTYENTFTIGSSHAVDPFTVVKTRFSDNGKVAMLCQREWRPKSLVTFSAEYDSKAINASPKMGLALALKP	79.04	7e-159	gi|462419446|gb|EMJ23709.1|	hypothetical protein PRUPE_ppa009817mg [Prunus persica]	-
5473	CotAD_27998	27419.6	0.326	4|-|-	49|-|-	3.09	-	0.001|-|-	CotAD_27998	MSYLTISQISSLLFFSVLFISAHAARFEIRNECSYTVWAAASPGGGRRLDPRQSWTIDVPAGTAMARIWGRTNCNFDASGRGHCQTGDCGGLLQCKGWGVPPNTLAEYALNQFGNMDFYDISLVDGFNIPMVFGPTNGGCHNIRCTADINGQCPNELRAPGGCNNPCTVFKTNEYCCTQGYGTCGPTRYSRFFKDRCRDSYSYPQDDPSSTFTCPAGSNYRVVFCPRGSPHIEMVGSKSQEK	100	4e-157	gi|34538351|gb|AAQ74156.1|	osmotin-like protein I [Gossypium hirsutum]	-
5479	CotAD_07234	35540	0.312	1|5|1	1|21|1	1.11	0.011	0.849|0.001|0.996	CotAD_07234	MSSERVPVELSKGVNGLEKIILRETRGSSAEVYMYGGHVTSWKNEHGEELLFVSSKALFKPPKAIRGGIPICFPQFSNHGPLEPHGFARNRLWSIDTDPPAFPTNSSNKAYIDLILKPSEEDMKIWPHSYEFRLRVALGPGGDLMLTSRIRNTNTDGKPFTFTFAYHTYFSVSDISEVRVEGLETLDYLDNSLNKQRFTEQGDAITFEAEVDKIYLSTPTKIAILDHEKKRTLVLRKDGLPDAVVWNPWDKKAKAMADFGDDEYKHMLCVEAAAIEKPITLKPGEEWRGRQELSAVPSSYCSGQLDPRRVLQGS	89.49	0	gi|225446010|ref|XP_002268176.1|	PREDICTED: putative glucose-6-phosphate 1-epimerase [Vitis vinifera]	RSc1585
5508	CotAD_20648	60853.4	0.134	1|1|-	6|8|-	1.26	-	0.128|0.016|-	CotAD_20648	MAEAARLICFSHGKSVNVPCRTSGFTRKERFHRRLVAHFHGMMLLKLQSSCRNSRYSQLIKPNMNYSASKLRCSHQLSRRKERKFSSSSSNERTPKAEEVFSFQMPIISNLLEQWSQSQTVKLVGLLACAYLVIPSAAAVDALKTCTCLLKECSFINEPPTSLITLDCILKYIKIKVLPSSNSMCNVILVRIELAKCIANPSCAANVACLQTCNDRPDETECQIKCGDLFENNVVDEFNECAVSRKKCVPQKSDIGEFPVPYPAVLVENFNIADFTGKWFISSGLNPTFDTFDCQLHEFHTEGGKLVGNLSWRIRTPDGGFFTRSATQRFVQDPNHPGILYNHDNEYLHYQDDWYIISSKIENKPDDYVFVYYRGRNDAWDGYGGAVVYTRSAVLPKTI…	66.79	0	gi|225462409|ref|XP_002267152.1|	PREDICTED: violaxanthin de-epoxidase, chloroplastic [Vitis vinifera]	-
5510	Cotton_D_gene_10039302	40635	0.186	2|2|-	8|10|-	2.08	-	0.007|0.001|-	Cotton_D_gene_10039302	MLLVSILNPVVSHKSCDFPAVFNLGDSNSDTGGYASAFTPPTSPYGDTYFHMPARRFSDGRLTIDFIAEAFGLPFINAYLDSVGTNFSHGINFATAASTIRLPISVIPNGVFSPFYLGFQYSQFEQFKVRSQMIRKQGGLLASLMPKEEYFSKALYTFDIGQNDLGEGFFSNLTVQEVNASIPDIINKFSANIKNIYNLGARFFWVHNTGPIGCLPYVLVAFASAEKDPSGCLKPYNEVAQYFNLKLQESIAQLRNEFPSAAFTYVDIYSVKYSLFAEPQKHGFELPLVTCCGYGGEYNYSAAVLCGGTITVNGTEIFVGSCDNPSVRVVWDGIHFTEAANKFIFDQISTGSFSDPAVPLKQACQS	71.43	0	gi|224084882|ref|XP_002307434.1|	predicted protein [Populus trichocarpa]	-
5514	CotAD_11574	23713.5	0.692	2|2|2	28|15|15	1.8	0.002	0.001|0.001|0.001	CotAD_11574	MAMATQASLFTPSTLCTPKSGDRIAAVLRKQPPFLTVPSFKSPKSIIAPRTIKAQATEEKAETTATKEAPVGFTPPELDPNTPSPIFGGSTGGLLRKAQLEEFYVITWESPKEQIFEMPTGGAAIMRQGPNLLKLARKEQCLALGTRLRSKYKIKYQFYRVFPNGEVQYLHPKDGVYPEKVNPGRQGVGQNFRSIGKNVSPIEVKFTGKQVYDL	83.64	9e-120	gi|255551453|ref|XP_002516772.1|	Photosystem I reaction center subunit II, chloroplast precursor, putative [Ricinus communis]	-
5522	CotAD_69801	34974.8	0.304	1|1|2	1|3|3	1.86	0.09	0.001|0.006|0.001	CotAD_69801	MAKELEGFNFEQRHGKARVRVGRVWRSKDGCRHFMVEWNVNISLLSNCVAAYVRDDNSDIVATDTMKNSVYVKAKECSEQLSAEEFAILLGKHFTSFYPQVFTAIVKIVEKPWERISVNGQPHEHGFKLGSEKHTTEAIVQKSGVLQLTSGVEGLSLLKTTQSGFEGFIRDKYTALPETRERMLATEVTASWRYSYESVSSIPQKSLYLNEQYLNVKKALVDAFFGPPERGVYSASVQSTLLQMAKAVLGRFSDISSVKLKMPNIHFLPVNISSKDHGSIVKFDDDVYLPTDEPHGSIEASLSRFWSKM	80.91	0	gi|224110112|ref|XP_002315419.1|	predicted protein [Populus trichocarpa]	BS_yunL_2
5523	CotAD_07011	38134	0.137	1|2|2	2|2|5	2.04	0.026	0.042|0.035|0.010	CotAD_07011	MEFSRAQMAPAAFVFGDSLVDVGNNNYLPVSIAKADFPHNGIDFPTRKPTGRFSNGKNAADLLAEKLGLPSSPPYLSLLKKTDESSYINGVSFASGGAGIFNGTDQTYGQSIPLLKQVDNYIVVYKSLVQQMGSPGAEKHLSKSLFTIVIGSNDILDYFGSSDLRKKSTPQQFVDSMANTLKGQLKRLYETGARKFVLTGIGAIGCIPAERVKNKTHECNEECNFWSVKYNEELKAMLKGLKSELQGINYSYFDTYSIMQNVIQKPSSYGFNEIESACCGLGDLKAKVPCVPISKYCSNRKDYVFWDLYHPTEATATIFVHTLFDGPSQYCIPMNVRQLVSA	68.71	3e-169	gi|224116598|ref|XP_002317343.1|	predicted protein [Populus trichocarpa]	VCA0218
5529	CotAD_03841	25226	0.187	2|-|3	6|-|3	1.43	-	0.008|-|0.061	CotAD_03841	MTNTLTAQLHLVPPFPSPSKQSSISQPQIKIPNNPNPKPKPIIFSKFLSLALTVTLNSPLPSLAIPSLTSQSSPQAPLTTTPFTQSKFLQLGLEDGKIRPCPSTNPGCISTNAKSSSFAFPWVVPETSKENAVQELQEAILKTQKNAKIEDVEDTPNGKYIQAEVDGGFGPDVMEFLVKGDVVTYRSMAMKVTYIYPFTTAIGDSKGQLERLKKIVDQLGWYVPSFDSME	74.33	4e-102	gi|224136191|ref|XP_002322266.1|	predicted protein [Populus trichocarpa]	-
5530	CotAD_73693	9366.44	0.218	-|2|-	-|4|-	2.22	-	-|0.024|-	CotAD_73693	MADAIELKTAPADFRFPTTNQTRHCFTRYIEFHRCLAAKGEESNQCEKFAKYYRSLCPGEWIDKWNEQRENGTFPGPL	88.46	4e-49	gi|18424030|ref|NP_568867.1|	cytochrome c oxidase subunit VIb [Arabidopsis thaliana]	-
5538	Cotton_D_gene_10019372	59125.3	0.263	8|10|8	31|26|27	1.43	0.005	0.001|0.001|0.001	Cotton_D_gene_10019372	MGSGKWCLQKRDSFRSDSLSGNENVPETGCLSIIVLGASGDLAKKKTFPALFNLYCQGFLPPDEVHIFGYARTKISDDDLRNRVCGYLVNDRSASPSEDVSKFLQLIQYVSGSYDGADGFQLLDKEITKHEISKSSQEGSSRRLFYLALPPSVYPSVCRMIRKYCMNKSDLGGWTRIVVEKPFGKDLDSAEQLSSQIGELFDEPQIYRIDHYLGKELVQNLLVLRFANRFFLPLWNRDNIDNVQIVFREDFGTEGRGGYFDEYGIIRDIIQNHLLQVLCLVAMEKPVSLKPEHIRDEKVKVLQSVLPIKDEEVVLGQYEGYRDDPTVPNHSNTPTFATVILRIHNERWEGVPFILKAGKALNSRKAEIRVQFKDVPGDIFKCQKQGRNEFVIRLQPSEA…	86.82	0	gi|449466540|ref|XP_004150984.1|	PREDICTED: glucose-6-phosphate 1-dehydrogenase, cytoplasmic isoform-like [Cucumis sativus]	NMB1392
5539	CotAD_21246	31123.3	0.121	3|3|2	4|7|9	1.27	0.011	0.261|0.003|0.004	CotAD_21246	MACASWLHLHSPSLTRVILPILHHPTALFHRFNIFTSPAGFTSSVNQTNPLLTPVHAQAKRGFSSKDHKIYSAEDLQFEPPLKIVEYPDPILRKRNKRIDTFDENLKKLVDEMFDVMYKTDGIGLSAPQVGINVQLMVFNPVGERGEGQEIVLVNPRVAKYSKKMVLFNEGCLSFPRIYADVQRPESVKIDAQDISGARFTIDLSELPARVFQHEFDHLQGILFFDKMTDEVLDGIRKQLEELEKKYENKTGLPSPEKVETRKRKKAGVGFGK	71.33	3e-137	gi|225452422|ref|XP_002276964.1|	PREDICTED: peptide deformylase 1B, chloroplastic [Vitis vinifera]	BU496
5543	CotAD_62951	41119.1	0.216	5|6|1	17|18|2	1.41	0.007	0.004|0.001|0.079	CotAD_62951	MDRFSLLFLLLSSVVASAVVSDVNSDDDPLIRQVVSDGGVEEDSDDHLLNAEHHFTLFKSKYGKTYASQEEHDYRLGVFKANLRRAKRHQVLDPSAVHGVTKFSDLTLSEFRRQYLGLKPLKLPADAQKAPILPTDNLPDDFDWRDHGAVTGVKDQGSCGSCWSFSATGALEGAHYLATGELVSLSEQQLVDCDHECDPQQYGACDSGCNGGLMTSAFEYTLKVGGLEREKDYPYTGNDRGPCKFDKTKIAASVSNFSVISVDEDQIAANLVKHGPLAVGINAVFMQTYMGGVSCPYICFRTLDHGVLLVGYGAAGYSPIRFKDKPFWIIKNSWGANWGEDGYYKICRGRNVCGVDSMVSSVAALHTKSQ	82.11	0	gi|317106675|dbj|BAJ53178.1|	JHL18I08.12 [Jatropha curcas]	MA1513_1
5545	CotAD_62171	36403.8	0.309	8|1|1	35|9|7	1.68	0.007	0.001|0.006|0.049	CotAD_62171	MATTVDSGNQYDRAEEVKRFDDSKIGVKGLVDSGLTTIPRIFVHPPETLSHLKPKPKSVAIPTIDLSGTRSTVVEQVAAASRSFGFFQIVNHGIPVQVLDRMIASIRAFHELPTDVKARFYRRDAGTGVSFISNVDLFHSKAASWRDTLQIRLGPTLPELEHIPEVCRDEVVQWNLHSTTLGEQLMGLLSEGLGLDKDTIKNTTCLDARDHTGGLQIKHEGEWVDVKPVHGALVINIADILQIMSNDEYKSVEHRVLANPSEEARVSIAVFFNPSAREALYGPFAELTSPEKPAHYRQFIYNDYMRRFFTKELDGKTLTNFYKL	60.38	6e-157	gi|224111448|ref|XP_002315859.1|	predicted protein [Populus trichocarpa]	mll0111
5554	CotAD_20568	53544.8	0.012	-|1|1	-|1|2	2.87	-	-|0.155|0.008	CotAD_20568	MYYKVANASEYLVITGVGIQDIKLAKKAWILPGQSYTVFDLSPVNYTFEVQAMSAEKLPFVLPAVFTIGPRVDDEPSLLKYAKLISPHDKLSNHVKELVQGIIEGETRVLAASMTMEEIFKGTKEFKLEVFEKVQLELNQFGLLIYNANVKQLVDVPGHEYFSYLGQKTQMEAANQAKVDVAEARMKGEIGSKLREGQTLQNAARIDAETKIISTQRQGEGKKEEIKVKTEVKVYENQREAEIAEANADLAKKKASWAKEAQVAEVESAKAVALREAELQQEVERMNALTRTEKLKAEFLSQASVEYDTKVQEANWELYQKQKQAEAILYEKEKEAAGQKAIADAAFYGRQRVADVELYAKQKEAEGLMALAQAQGVYLRTLLEALGGNYAALRDYLMI…	86.51	0	gi|224143233|ref|XP_002324888.1|	predicted protein [Populus trichocarpa]	BH3500
5557	Cotton_D_gene_10022821	27395.2	0.265	1|1|2	1|1|3	1.2	0.008	0.001|0.117|0.001	Cotton_D_gene_10022821	MATSIAARISRKAAASAFSAHRHVISSRCFATESAKTISPSSDRVKWDYRGQRKIIPLGQWVPKVAVDAYVAPNVVLAGQVTVYDGASVWSGCVLRGDLNKITVGFCSNVQERCVIHAAWSSPTGLPAETSIERFVTIGAYSLLRSCTIEPECIIGQHSILMEGSLVETHSILEAGSVVPPGRRIPTGELWAGNPARFVRALTHEETLEIPKLAVAINDLSKEHFSEFLPYSTVYLEVEKLKKSLGINI	90.18	5e-151	gi|356513425|ref|XP_003525414.1|	PREDICTED: uncharacterized protein At5g63510, mitochondrial-like [Glycine max]	TVN0606
5561	Cotton_D_gene_10019951	66202.6	0.036	1|2|2	4|4|3	1.78	0.061	0.047|0.002|0.027	Cotton_D_gene_10019951	MGVEPACPVLLLFLAGIIIWVVEAEVHYYDFVLAEKNFTRLCKTKSMLVVNGQFPGPTIYVHKGDTVFVNVHNHGDSGLTVHWHGVKQPRNPWSDGSAYITQCPIEPGHNFTYEVVFSEEEGTLWWHANSDWTRNTVHGAIVIYPPHGFSYPFPTPAGEQILILGTWFTYDVNKVIKEILRTGKDVPVSDAYIINGQPGDFCACSKEMAYRWQVDYGKTYLIRLVNALMNEEFFFAIAGHDLIVVGIDGSYLKPFTTSYVMLSNGQTMDVLVKTNRSPGRYYMAGRQYYTDNLFFTGYDKTNASAILEYRGKYDRLSSPFFPEKLPSYTDYDSATQFRKRLKSLASKEHPIDVPRNVTTQMYITASMDKIVHNFSAYMDYTLLSSLNNISWVNPSTDVL…	63.49	0	gi|255567618|ref|XP_002524788.1|	laccase, putative [Ricinus communis]	SMa1038
5564	Cotton_D_gene_10001203	50966.8	0.27	1|1|1	4|1|1	1.4	0.005	0.024|0.583|0.698	Cotton_D_gene_10001203	MLGALRRKVASGRSSASILGKSLQAIRPGVSASRISSNAGKEMLSVQLRGIAHVRSFSHLGLPGCSAGLIKTRDAICIIQPEAIMQTSCRAFSSGDGDLVDAVVPFMGESISDGTLATFLKKPGDRVKADEPIAQIETDKVTIDVVSPQDGVIQEYVAKEGETVEPGTRIAVISKSAEGVAAAAPTEMKSEKAASEPSPPAEAVKEDKPKAKVEASPAAAKPKAPSPPPPKRTASEPVLPPKERERRVPMTRLRKRVATRLKDSQNTFALLTTFNEVDMTNLMKLRSDYKDAFVEKHGVKLGFMSGFVKATVSALQHQPIVNAVIDGDDIIYRDYIDISIAVGTSKGLVVPVVRDADKMNFAEIEKTINNLAKKANDGTISIDEMAGGSFTISNGGVYG…	74.26	0	gi|460397090|ref|XP_004244101.1|	PREDICTED: dihydrolipoyllysine-residue succinyltransferase component of 2-oxoglutarate dehydrogenase complex 2, mitochondrial-like [Solanum lycopersicum]	BS_odhB
5590	Cotton_D_gene_10017975	28302.3	0.359	6|6|1	67|58|1	1.25	0.006	0.001|0.001|0.690	Cotton_D_gene_10017975	MASSLTTLSNVGLLSSPRTPPKNQPISTSCNSFNFPRTLSLSPKISSSSSSFSGSFRFPRFNSPQTNNHRVRRSVRATAEVAPIQSKITNKVFFDVSIGNPVGKLAGKIVIGLYGDDVPQTTENFRALCTGEKGFGYKGSAFHRVIKDFMIQGGDFDKGNGTGGKSIYGRTFKDENFKLSHAGPGVVSMANAGPNTNGSQFFICTVKTPWLDQRHVVFGQVLEGMDTVKLIESQETDRGDRPRKKVVISDCGELPMSET	74.33	2e-120	gi|359473789|ref|XP_002265030.2|	PREDICTED: peptidyl-prolyl cis-trans isomerase CYP20-2, chloroplastic-like [Vitis vinifera]	MA1661
5591	CotAD_60770	65967	0.164	-|3|3	-|5|6	1.22	-	-|0.250|0.019	CotAD_60770	MTYLKLEVTMEKSVVLVIGFWLLLLGNGVQSHRQDKKHQSLPRDQPYRTGYHFQPPKNWMNDPNGPMYYKGVYHLFYQYNPYAAVWGNITWAHSISYDLVNWINLDIALSPGDPFDINGCWSGSTTFLSGEKPVILYTGSDTMNRQVQNLAEPKNLSDPLLREWVKSSHNPLMSPVDGIDPKNFRDPTTAWQGPDGLWRVLVGNEMDGHGRALLYRSQDFITWSQSKEPIHSSTRTGMWECPDFYPVSIDGKNGVETSSLDKFTKHVLKASFDNSDHYVLGNYTSVTDNFLVDTDFLDNDSDLRYDYGNFYASKTFFDSGKKRRILWGWILESDNTTDDVKKGWSGLQSIPRTILLSKTGKQLIQWPLEEIEKQHTIKVSFENKELKGGSVLEVSGITA…	70.05	0	gi|224092180|ref|XP_002309496.1|	predicted protein [Populus trichocarpa]	SP1724
5613	CotAD_57928	16139.3	0.206	2|1|2	5|6|10	1.31	0.002	0.083|0.016|0.001	CotAD_57928	MEIDVPASVAYKCYSDREAIPNWMPFISSVQVLEDKPDLSRWSLKYNAFGRDLEYSWLARNMRPIPNQKIHWRSLEGLPNRGAVRFYPKGPSSCLIELTVSYEVPQLLAPVASALQPFLENLLKSGLDRFAKYAKSSGSTR	87.5	6e-88	gi|255645833|gb|ACU23407.1|	unknown [Glycine max]	DR2377
5615	CotAD_34590	28847.2	0.035	-|-|1	-|-|4	1.59	-	-|-|0.008	CotAD_34590	MAFASVFRKSANALAPLAIRLTRVQRNYHSSIFRALNHGLQSQKPAVNRFYPNSFHFSTAVASKKPSSDESLIRVLESEIQFAEGDSSDQVVGTPSGFPFEVEDNPGTQIVTLTREYNGELIKVDVHMLDLNEDEQDEDEVEDNDGDNNNARIPFVVTVSKKDGPSLEFSCTALHDGIGIDSLSFRNPNPGDDELAYEGPDFNDLDENLQKGFYKYLDVRGIKPSTTNYLREYMADKDNREYLLWLKNLKKFVEE	56.64	4e-91	gi|225449374|ref|XP_002282374.1|	PREDICTED: uncharacterized protein At2g39795, mitochondrial [Vitis vinifera]	-
5624	CotAD_42784	40589.7	0.095	2|1|-	3|4|-	1.59	-	0.017|0.269|-	CotAD_42784	MDRLKHFQSLIDQSTIQSAVTPNGGIYLINLSFGTPPVEYMAVADTGSDLIWIQCVPCPQSQCYPQGSPPFDPQASSTYKKIPCGSDSCQALPRYQCSNDVNDCQYLYRYGDKSFTRGILSTDTITFDDSNGQKTAFPTSIFGCGHNNLGKFRSPSAGLVGLGGGPLSLVSQISTQIDHRFSYCLVPLSASSSSKLLFGQEAIISRPGAVSTPLVSKAPQTYYYLSLEGVSIGDKTAQAGSSQGNIIIDSGTTLTYLESSFYSSLETIVKDAIGADPVQSPSESFSLCYGSETNINVPEMVFHFSGADLRLQPVNTFANFDDNLVCMLIAPTPSDLPLSIFGNFAQINLQVEYDLEKRTVSFVPTDCTNQ	51.22	5e-110	gi|470105913|ref|XP_004289322.1|	PREDICTED: probable aspartic protease At2g35615-like [Fragaria vesca subsp. vesca]	-
5630	CotAD_48121	35650	0.273	4|3|4	7|12|10	1.69	0.004	0.001|0.003|0.008	CotAD_48121	MEMSCFNQRVFLLTLLLPIVVILVEGQGTRVGFYSTSCPKVESIVSSTVQSHFKSDPTIAPGLLRMHFHDCFVQGCDGSILIDGPNAEKTAPPNQLLRGYKVIDDAKTQLESVCPEVVSCADILALAARDSVVLTSGASWAVPTGRRDGTVSQSSDANNLPGFRDTVNVQKQKFADKGLNTQDLVTLVGGHTIGTAACQFFSYRLYNFTSTGADPSINPAFVSQLQALCPQNGDGSRRIGLDNGSANKFDTSFFANLRDGKGILESDQRLWTDNSTKTFVQRFLGVRGLLGLTFNVEFGKSMVKMSNIGVKTGTAGEIRKVCSKVN	86.28	0	gi|19698452|gb|AAL93154.1|AF485268_1	bacterial-induced class III peroxidase [Gossypium hirsutum]	-
5632	CotAD_49549	16955.3	0.196	-|-|1	-|-|2	2.63	-	-|-|0.013	CotAD_49549	MLYSRQGPPFGLQGQTIARLIEMGAHTIGQARCTSFRARIYNESNIDASFAQTRQRNCPRTTGSGDNNLAPLDIQTPTSFDNSYFKNLVSQRGLLHSDQQLFNGGSTDSIVRGYGNSPSSFNSDFVAAMIKMGDISPLTGSRGEIRKNCRRVN	90.34	4e-90	gi|32351452|gb|AAP76387.1|	class III peroxidase [Gossypium hirsutum]	-
5634	Cotton_D_gene_10028944	37676.3	0.285	6|1|7	22|3|17	1.21	0.019	0.216|0.230|0.002	Cotton_D_gene_10028944	MINQIDDQSVPPKTRVRAKKGSSSKDTLLTMDGRVAKLEESIGDVKESLKVIESSIIKLNFKRDELKEHVQDALNANVKQMQGIQSVKVGNVSLGASEQDIKEFFSFSGDIEHVEMHGNNERSQVAYVTFKDPQGAETAVLLSGATIVDQSVTIELAPDYKPPATASATPATQNKEAGQAESAVQKAEDVVTSMLAKGFILGKDAVNKAKAFDEKHQFTSTATAKVASLDQKIGFTEKISAGTTMVNDKVREMDQKFQVSEKTKSAIAAAEQTVSSAGSAIMKNRYVLTGTSWVTGAFNRVAKAAGDVGQKTKEKVLAEEEEAHKSKGYARMDECESPKAGAPSSAQGLIL	80.47	2e-138	gi|255558037|ref|XP_002520047.1|	nucleic acid binding protein, putative [Ricinus communis]	-
5646	CotAD_21620	36118.2	0.079	2|-|2	8|-|11	2.13	-	0.011|-|0.001	CotAD_21620	MCRTILESTIVDKHEQWMVDFSRKYESKLEKEKRLNIFKDNLEYIESFNNGGNRSFKLGLNEFADMTQDEFIATHTGYKMQNNPTLLESTPFMYENYSNAPKSFDWRDQNAVTHIKNQGQCGCCWAFSAVAAVEGLIKIKTGKLIPLSEQQLLDCSRNGGNQGCEGGWMMNAFDYISQNQGITSEESYPYKEMQETCDTQINEVATISGYQMVPKNDEEALLKAVTNQPVSVALEGHGRDFRFYNGGVFKGDCGNSLTHAVTIVGYGTSEEGLNYWLIKNSWGQSWGENGYMKIQRNVERKGGLCGIAMKASYPIA	58.54	2e-135	gi|460414499|ref|XP_004252606.1|	PREDICTED: KDEL-tailed cysteine endopeptidase CEP1-like [Solanum lycopersicum]	MA1660_1
5651	Cotton_D_gene_10009492	59511.8	0.11	-|1|1	-|2|2	1.88	-	-|0.118|0.045	Cotton_D_gene_10009492	MGGDGDSSESRLGDNGGGEEEGVMVNIRCSNGSKFTVRTKLESTIGSFKVVLAQSCDIPADQQRLIYKGRILKDDQTLQSYGLQADHTIHMVRSFAPSSSAPPPVATTNVGTPNTTPGVTRGVGSNEGAGLGASIFPGLNPLGGNGGSFGLFGSGLPEFEQVQQQLTQNPNMMREIMNTPAIQSLVNNPELMRTLIMSNPQMREIIDRNPELGHILNDPSILRQTLEAARNPELMREMMRNTDRAMSNIESSPEGFNMLRRMYENVQEPFLNATTMAGNNGNSPGSNPFAALLGNQGGSQARDSPSNISVTGSESIQGQTSPNTNPLPNPWNNTVRGVTQTNTTARSNPAGDARTPGIGGLGGLGLPDMPPMLNGMPDASQMTQLLQNPAISQMMQSIM…	84.45	0	gi|327344117|gb|AEA50963.1|	putative PDF1-interacting protein 1, partial [Gossypium barbadense]	YLL039c
5652	CotAD_49898	57736.9	0.241	5|1|4	11|2|5	1.32	0.013	0.001|0.645|0.324	CotAD_49898	MATTTQSPSPPNSNDDKPQPSSEVVEQANGVQQDVRPEATKQNVPASVFVNSEPIREDQVSNAVKFLSHPKVRGSPVIYRRSFLERKGLTKEEIDEAFRRVPDPPPSSQPASSNQDGQVITSSNVQSQAAVAAPQPVVAAPTGMVPARTVARWQFHWYHAVFGLGFLAASGAGSALLIKNVIVPRLKSWIRKVVLEEENDHAKKLDAKPSLAEEAAAAAKAAAAAAADVAKASQEMLNSKNEERRRFEEFMNLMDAQVQEMKLMSNSIRKLEGQANSPSRTFSDHEDHRVSASSTKQTYPNGKVDIDVLSARSSSPPVSAEPPHPKSYMEIMAMIQRGEKPSNIREVNDMPPNPNQQISNPRITPRSKPWEAQNGSSQVLQSQRSAEGLNGQDNGLNYL…	61.75	2e-148	gi|462405639|gb|EMJ11103.1|	hypothetical protein PRUPE_ppa004183mg [Prunus persica]	-
5655	Cotton_D_gene_10028883	63374.3	0.204	1|1|1	3|3|3	1.98	0.217	0.065|0.030|0.001	Cotton_D_gene_10028883	MANSCVGLFLFFALFLSHGIVELEASHHVYRNLQTVQSAASTDQPYRTGFHFQPPKNWINGVMVYKGLYHLFYQYNPKGAVWGNIVWAHSTSKDLVNWTPHEPAIFPSQPSDINGCWSGSSTILPGGKPAMLYTGIDTKNSQVQNLAVPKNLSDPYLREWVKSPKNPLMQPTAQNQINASSFRDPTTAWLGPDKKWRVIIGSKIDRQGLVILYKSKDFVNWVQAPMPLHSAKDTGMWECPDFYPVPVSGKNGVDTSLNGPYVKHVLKISLDDTKHDLYTIGSYDSLKDIYIPDKGSVENDSGLRYDYGKYYASKTFLDSIKNRRILCGWLNESSSVADDIKKGWAGVHAIPRQVWLDKSGKQLIQWPVAEIQKLRTNHVSLPSRLLKGGSVVEVSGVTA…	75.09	0	gi|462411459|gb|EMJ16508.1|	hypothetical protein PRUPE_ppa003470mg [Prunus persica]	YIL162w
5660	CotAD_09345	60735.4	0.255	7|9|8	15|13|16	1.17	0.001	0.001|0.068|0.116	CotAD_09345	MADCLDGNVLAAKSFARFGVTHMFGVVGIPVTGLANRAVQLGIRFIAFHNEQSAGYAASAYGYLTGRPGLLLTVSGPGCVHGLAGLSNAMINTWPMVMISGSPDQKDSGRGDFQELDQIEAVKPFSKFSVKAKDIKEIPDCVARVLDHAVSGRPGGCYLDLPTDVLHQMITESEAEKLLTEVEKGRVFEATKAPPSSEIAKAVSVLRKAERPLIVFGKGAAYARAEGELKKLVERTGIPFLPTPMGKGLVNDDHELAASAARSLAIGKCDVALVVGARLNWLLHFGESPKWDKDVKFILVDVSEEEIKLRKPHLGLVGDAKKVLEMINKEIKDDPFCLGKSHPWVEAISKKVKDNVSKMESQLAKDVVPFNFLTPMRIIRDAILGVGSPAPVVVSEGAN…	100	0	gi|211906508|gb|ACJ11747.1|	pyruvate decarboxylase [Gossypium hirsutum]	TM0548
5662	CotAD_37277	161815	0.038	-|1|3	-|4|3	1.3	-	-|0.025|0.896	CotAD_37277	MSNSVGQNLIQQHFLRPTVLEHQSKLKGSSGIASNSLCATASLNQSLAQPRKYQISTKFYGNSLSKRKHKLAMGSQRPLAFIPQAVLATDPASENLGKFNIDGNIELQVDASAPTSGSITNVNFRVMYTSDSLLLHWGAIRGSNDKWVLPSRQPEGTRNHKNRALRTPFVKSGSSSYLKLEIDDPQIQAIEFLIFDEARNKWIKNNGQNFHVKLPQRKTLVSNISVPEDLVQEEYEAARAEILEEISKGASVDDIRSKITKKSGQEYKETAINEENNKIPDDLVQIQAYIRWEKAGKPNYSPEQQLREFEEARKELQSELEKGASLDEIRKKITKGEIKTKVAKQLQNKKYFSPERIQRKQRDLMQLLNKHAVKVVEESISVEVEPKPLTAVEPFAKEK…	71.17	0	gi|225425619|ref|XP_002270485.1|	PREDICTED: alpha-glucan water dikinase, chloroplastic [Vitis vinifera]	Cgl0538
5664	Cotton_D_gene_10038083	22964.8	0.648	-|1|1	-|1|2	1.92	-	-|0.988|0.010	Cotton_D_gene_10038083	MAMATQAGLFTPTITTPKSLAPWKPASSFSFATSSKSLNFSMAQRTIRAAAADEEASSAAATKEAPVGFTPPELDPNTPSPIFGGSTGGLLRKAQVEEFYVITWDSPKEQVFEMPTGGAAIMRQGPNLLKLARKEQCLALGTRLRSKYKIKYQFYRVFPNGEVQYLHPKDGVYPEKVNPGRQGVGQNFRSIGKNVSPIEVKFTGKQVYDL	86.19	6e-117	gi|255559414|ref|XP_002520727.1|	Photosystem I reaction center subunit II, chloroplast precursor, putative [Ricinus communis]	-
5675	CotAD_71432	61364.1	0.313	4|6|1	11|10|2	1.11	0.01	0.380|0.018|0.928	CotAD_71432	MGSSGQQVSWKLADHPTLPKGKTLALIVLDGWGEYKPDEYNCIHVAQTPTMDSLKQGAPEKWRLIRAHGKAVGLPTEDDMGNSEVGHNALGAGRIFAQGAKLVDIALASGKIYEGEGFKYISECFEKGTLHLIGLLSDGGVHSRLDQLQLLLKGASERGAKRIRVHILTDGRDVLDGSSVAFVETLESDLAKLRENGVDARIASGGGRMYVTMDRYENDWDVVKRGWDAQVRGEAPHKFANAVEAVKKLRENANDQYLPPFVIVDENEKAVGPIEDGDAVVTFNFRADRMVMLAKALEHQDFDKFDRVKVPKIHYAGMLQYDGELKLPGHYLVSPPEIDRTSGEYLVHNGVRTFACSETVKFGHVTFFWNGNRSGYFNPEMEEYAEIPSDVGITFNVQP…	87.88	0	gi|239056191|emb|CAQ58628.1|	Putative 2-3 biphosphoglycerate independant phosphoglycerate mutase [Vitis vinifera]	HP0974
5688	Cotton_D_gene_10013855	22247.1	0.147	2|2|-	4|9|-	3.98	-	0.001|0.001|-	Cotton_D_gene_10013855	MAEEHTKVGGEEAVASKERGMFDFLGKKEEEKPQPQEEVVATQFEKVKIEEEHKEDEKKHSLLDKLHRSNSTSSSSSDEEEGDGGEKKKKKKEKKGKKEEDSAVPVEKCDEAATVHHSETPEKKGFMEKIKDKLPGQHKKDEEVTTPPPAAAAPTENDHHEGETKEKKGFLEKIKEKIPGYHSKTEDEKEKETTAPH	59.56	4e-22	gi|349844870|gb|AEQ19904.1|	dehydrin 2 [Vitis yeshanensis]	-
5700	CotAD_22468	24974.3	0.231	2|2|1	5|5|4	3.44	0.891	0.009|0.003|0.004	CotAD_22468	MKTTTASVFLLFIIFSITPLSFSFGVANTTNAPVLDSDGNELRTGTPYFVVSAIWGAGGGGLAPGMPREKPCPEVVAQRGSGDDGIPVIFSNLDSNDDVVRLSSDINIEFIFRRPKFCLTTTTVWKVDDYDHSAGKWWVITDGVKGNPGANTLTSWFRIEKMGNLDYTFKYCPAVCGTCPALCNKITRDSDGEMIRLALSTDHGWQFFFKKVGTSAMEIQQVVHN	58.41	5e-78	gi|55139090|gb|AAV41233.1|	putative 21 kDa trypsin inhibitor [Theobroma bicolor]	-
5703	Cotton_D_gene_10006374	12232.1	0.046	-|1|-	-|2|-	2.63	-	-|0.010|-	Cotton_D_gene_10006374	MERSTGPDPMAESSKMETEPQNLDRIQVDLLLGKAYSDWGHVSDAVAIYDQLISSNPNDFRGYLAKGIILKENGNVGDAERMFIQARFFAPEKAKALVDRYSRQRKFM	77.45	1e-51	gi|224097412|ref|XP_002310923.1|	predicted protein [Populus trichocarpa]	-
5706	CotAD_52573	40783.4	0.245	1|2|2	3|5|6	1.48	0.009	0.026|0.065|0.152	CotAD_52573	MKVSVKTLKGTHFDIEVKPEDAVADVKKNIETVQGADVYPAAQQVLIFKGKVLKDDTTLAENSVNENSFIVIMLTKNKGASGECSTASAAPTKKAPEASSLPTATVRASTAPVVTSAAAAPPAESAPVASSTPLSDSDVYGQAASNLVAGSNFEGTIQQILDMGGGTWDRDTVVRALRAAYNNPERAVEYLYSGIPEQAEATPVAHAPVVGQTTSPAEPPQQPAQMAAIPTSGPNSNPLDLFPQGLPNMGASGAGAGSLDFLRNSPQFQALRAMVQANPQILQPMLQELGKQNPNLMRLIQEHQGDFLRLINEPAEGGEGNILGQLAEAMPQAVQVTPEEREAIERLEAMGFDRATVLQVFFACNKNEELAANYLLDHMHDFQD	71.07	0	gi|356575534|ref|XP_003555895.1|	PREDICTED: putative DNA repair protein RAD23-3-like isoform 1 [Glycine max]	YLR167w_1
5714	Cotton_D_gene_10016073	49397.6	0.104	4|4|4	7|4|8	1.42	0.013	0.001|0.135|0.048	Cotton_D_gene_10016073	MTAVFILIGVLLQLFTATTGIGVNYGMTADNLPPPSVVANFLKTQTIFDSVKLFDANPDVLRAFANTGISVSVTIGNGDIPGLTNTVTARRWVADHISPFHPQTKIKYICVGTEVLFSKNDVWINNLVPAMRSLHYALNKAGFQDIKVTSAHALNIFRRDTIPSLMRFMVGYDQSFFAPLLQFHQRTKSPFMVNPYPYFSPDITRRLNYALFKPNSGIYDKYTKKNYTNMFDSILDSTYTAMKALGYGNVEIAIGETGWPTQGDATSPFATMENAISYNGHVIKEIVSGKGTPLMPNRTFETYMFALFNENQKPGPLVEKYWGMFNPDLTPIYDVGLLRRGQSAPTPATPAPSSSKNFCVPKVDVSNTQLQSNLDYACGQEGIDCTPIQPGGACYEPNT…	56.33	0	gi|225449529|ref|XP_002283647.1|	PREDICTED: glucan endo-1,3-beta-glucosidase isoform 1 [Vitis vinifera]	-
5715	CotAD_70481	15601.5	0.092	1|1|1	6|7|9	5.56	5.143	0.040|0.028|0.033	CotAD_70481	MEKLRVCIVVLACVVVSAAAQSASNVRATYHLYNPQNINWDLTAASAFCATWDASKPLAWRQKYGWTAFCGPAGPQGQAACGRCLRVTNTATGTQATVRIVDQCSNGGLDLDVNVFNQLDTNGIGNAQGHLTVNYEFVNCGD	90.35	5e-60	gi|130840|sp|P29063.1|PR4B_TOBAC	RecName: Full=Pathogenesis-related protein PR-4B; Flags: Precursor	-
5742	CotAD_65691	47119.8	0.089	1|1|2	2|1|2	1.89	0.395	0.034|0.184|0.716	CotAD_65691	MADQKMKERRRVSLMIMVLIFQVLSASLHGCLAATGQGQPPRKPTSIHPRAGVRSSVFLPVSGNVYPLGYYSVTIGIGNPPKPFQLDIDTGSDLTWVQCDAPCTGCTLRRDQLYNPSKNNFVDCKDPICLAVNSPNPPQCKNPNEKCCFQVQYADHGSVLGFIVLDTFPVRLVNGTLSKPNLAFGCGHRLQNRGLHPPTPTAGVLGLGKSKASISSQLSSMGVTKNVFGHCLGDNRGFLFFGADFVPKSGMTWTRMLQSSSYKHYSSGPAELLFSGKPTGIKGVNVIFDTGSTYTYLNLKVYETVLNLIRKNLSGKQLHDVKDKALPICWKGTKPFKSVRDARNYFSTFALSFTGSSNVQLQLPPENYLIVTEQGNVCLGILNGAEAGLGTTNVIGDIS…	56.86	2e-161	gi|224082314|ref|XP_002306645.1|	predicted protein [Populus trichocarpa]	-
5748	CotAD_33636	25553	0.35	6|5|4	31|20|29	1.75	0.024	0.001|0.001|0.001	CotAD_33636	MATLTSSPSPSILSSSTANPKTPYLKPPLLFFPKPLTTALTTALATTTLLLTSPPSSIASDSYNVYYGTAASAANYGGYGGNSDKKASAEYVYDVPDGWKERLVSKVEKGTNGTDSEFYNPKKRQEKEYLTFLAGFRQLAPKDVILNNLALSDVELQDLIAGADSLVSEEKKDENGQLYYVYEIDGIGKHSLIAVTCAKNKLYAHFVNAPAPEWKRDEDTLRHIHESFKTVGSS	89.33	8e-98	gi|255571642|ref|XP_002526766.1|	Thylakoid lumenal 19 kDa protein, chloroplast precursor, putative [Ricinus communis]	-
5754	CotAD_56170	60708.4	0.158	1|1|1	2|3|2	1.28	0.009	0.697|0.310|0.001	CotAD_56170	MAEAARLICFSHGKSVKVPCRTSGFTRKERFHRRLVAHFHGMMLLKLQSSCRNSRYSQLIKPNMNYSASKLRCSHQFSRRKERKFSSSSSNERTPKAEEVFSFQIPTISNLLEQWSQSQTVKLVGLLACAYLVIPSAAAVDALKTCTCLLKECSFLNEPPTSLITLDCILKYIKIKVLPSSNSMCNVVLVRIELAKCIANPSCAANVACLQTCNDRPDETECQIKCGDLFENSVVDEFNECAVSRKKCVPQKSDIGEFPVPDPAVLVENFNIADFTGKWFISSGLNPTFDTFDCQLHEFHIEGGKLVGNLSWRIRTPDGGFFTRSATQRFLQDPNHPGILYNHDNEYLHYQDDWYIISSKIENKPDDYVFVYYRGRNDAWDGYGGAVVYTRSAVLPETI…	66.41	0	gi|225462409|ref|XP_002267152.1|	PREDICTED: violaxanthin de-epoxidase, chloroplastic [Vitis vinifera]	-
5761	Cotton_D_gene_10003107	101676	0.171	-|1|12	-|4|101	1.19	-	-|0.420|0.001	Cotton_D_gene_10003107	MNTTQKKDLLHHLLLFFIIFSATSSYLAVVHGVNEAVGYGYKLKSVSVDPEQKWLAADLSLIRNSSVYGPDIQNLNLFVSFETSDRLRIRVTDSGHQRWEIPQEIIPRQSQNPFSLGSPANYQTRKLMETRSVSDPTSDLIFTLQNTTPFGFTVKRRSSGDTLFDASPDPSDPRTFLVFKEQYIQLSSALPENRSSLYGLGEHTKRSFKLQHDDTLTLWNADLASANLDFNLYGSHPFYIDVRSASGSGRIAAGTSHGVLLFNSNGMDIVYGANRITYKVIGGIIDLYVFGGPLPHTVVQQYTELIGRPAPMPYWSFGFHQCRYGYKNVSDLEGVVAGYAKANIPLEVMWTDIDYMDGFKDFTLDPVNFPEDKMKQLVDKLHRNGQKYVVIIDPGISVN…	71.79	0	gi|255587355|ref|XP_002534242.1|	alpha-glucosidase, putative [Ricinus communis]	YPO0848
5762	Cotton_D_gene_10022489	18142.7	0.054	1|1|1	5|5|2	1.66	0.036	0.016|0.005|0.284	Cotton_D_gene_10022489	MGVLGKVVDGILLLTFVSMSVVPACLDAQVLLPKALFPDVLGRVYTWYTTTYQDYLLLDEPHFFMALMKLELVLVLPLAILNTYGLLTSKPWFNITCLIFGSALVTSTTAMVGDMLGSDKPSAGKLASMYSPFIGFGFLAILRGLLSESPSASKTIANGPTSALKKKA	45.51	8e-39	gi|255566379|ref|XP_002524175.1|	conserved hypothetical protein [Ricinus communis]	-
5779	CotAD_60606	46640.2	0.234	7|5|-	15|10|-	1.99	-	0.001|0.001|-	CotAD_60606	MSCVTSLGFLSLFLYIFPSLTSPSLLFQGFNWESCNKAGGWYNSLKNSIPDIANAGVTHVWLPPPSHSVGPQGYLPGRLYDLDASKYGSQAELKSLIEAFHQKGIKCLADIVINHRTAERKDGRGIYCIFEGGTPDDRLDWGPSFICGNDKEYSDGTGNPDTGLDYPPAPDIDHLNPRVQKELSDWMNWLKTEIGFDGWRFDFVRGYAPSITKIYMERTSPDFAVGEKWEDLSLGQDSQDAHRGALKDWVEAAGGVVKAFDFTTKGVLNAAVQGELWRLKDSNGEPPGMIGLLPQNAVTFIDNHDTGSTQKLWPFPSDKVMQGYAYILTHPGTPSIFYDHFVDWGLKDEITKLATIRRKNGISEASKVDILASDSDLYVAAIDEKIITKIGPKMDLGNL…	78.77	0	gi|224137490|ref|XP_002327139.1|	predicted protein [Populus trichocarpa]	lin0223
5799	Cotton_D_gene_10001800	28324	0.047	1|1|1	1|2|2	2.05	0.106	0.299|0.020|0.157	Cotton_D_gene_10001800	MTSTPTQENTKVEGSHEPPSEEDIKKWGTHVMGTPAAPSAHPDNQKAALWNASDHQQIYELPYVVYSPAERPSHNPFEPVINMFNTWSRKTESIARNIWHNLKTGPSVSEAAWGKLNLTAKAITEGGFESLFKQIFATDTDERLKKTFACYLSTTTGPVAGTLYLSTARVAFCSDRPLSFTAPSGQETWSYYKVMIPLANVGSVNPVVMKENPVESYIQVVTVDGHDFWFMGFVNFEKASFHLLNSVQDGKPLP	98.7	4e-172	gi|327344121|gb|AEA50965.1|	putative PDF1-interacting protein 3, partial [Gossypium barbadense]	-
5814	CotAD_18285	15760.2	0.051	-|1|-	-|1|-	10	-	-|0.007|-	CotAD_18285	MLKIAEVLREERVQMKLAEAKILFHEKFKELEETKRKQSDIENNSKAVFDSRESTRFASSEQPSSCYQNINSTATVSSSMAGQQKASQEAENPHIKRGIKGFVEFPKVVRAIGSKSRRWGSKLECQKAQLRINLSPSK	75.36	2e-62	gi|387940578|gb|AFK13153.1|	branchless trichomes [Gossypium arboreum]	-
5832	CotAD_71184	95625.5	0.1	5|4|3	6|7|4	1.28	0.008	0.190|0.005|0.119	CotAD_71184	MAENGKSATEKVPAVANPLSEQPSEIASNINYHAQFSPHFSPFKFEPEQAFFATAESVRDRLVKQWNETFVHYHKVDPKQTYYLSMEYLQGRALTNAIGNLDIQNAYSEALNKLGHELEEIAEQEKDAALGNGGLGRLASCFLDSMATLNLPAWGYGLRYKYGLFKQLVTKQGQEEIAEDWLEKFSPWEVVRHDIVFPVRFFGSVEINPDGSRKWVGGEVVQALAYDVPIPGYKTKNTISLRLWEAKARAEDFNLFQFNDGQYESAAQLHSRAQQICAVLYPGDATEDGKLLRLKQQFFLCSASLQDIILRFKERRSGKGSWKWSEFPSKVAVQLNDTHPTLAIPELMRLLIDDEGLGWDEAWDVTTRTIAYTNHTVLPEALEKWSQSVMWKLLPRHME…	89.16	0	gi|224104329|ref|XP_002313399.1|	predicted protein [Populus trichocarpa]	ECs4259
5835	Cotton_D_gene_10021718	17655.8	0.403	3|2|1	23|11|2	1.39	0.013	0.001|0.001|0.003	Cotton_D_gene_10021718	MSDEEHHFESKADAGASKTYPQQAGTIRKNGYIVIKNRPCKVVEVSTSKTGKHGHAKCHFVGIDIFTAKKLEDIVPSSHNCDVPHVNRTDYQLIDISEDGFVSLLTDSGDTKDDLRLPTDENLLKQIKDGFAEGKDLVVSVMSAMGEEQICALKDIGPK	98.74	3e-114	gi|295687227|gb|ADG27839.1|	eukaryotic translation initiation factor 5A [Gossypium hirsutum]	MTH869
5837	Cotton_D_gene_10031885	18986.2	0.311	3|2|2	30|24|24	1.16	0.007	0.001|0.004|0.658	Cotton_D_gene_10031885	MRAVIYLLPLTFIFFTIADGKRILPLLQPQPLESFKVNATQNVGSCTYTVSIRTSCSSTTYTRDQISLAFGDAYGNQVYAPRLDDPYSRTFESCSTDTFQIKGPCTYQICYLYLYRSGYDGWKPESVTVYGYYTKAATFNYNVFIPNGVWYGFDFCYRRGSASA	76.77	1e-84	gi|255553155|ref|XP_002517620.1|	conserved hypothetical protein [Ricinus communis]	-
5846	Cotton_D_gene_10001624	46718	0.327	6|3|5	171|104|116	2.06	0.005	0.001|0.001|0.001	Cotton_D_gene_10001624	MSLHSSLTMSLLSFSFLLLFTFSAKAIVPPSETFRFVNDGEFGPYVVEYGANYRVISIANAPFQLAFYNTTSNAFTLALRMATTRSESLFRWVWEANRGNPVRENATFSLGTDGNLVLADADGRIAWQIHLAKFDHPTDTLLVGQSLRIGGATKLVSRASAQNNVDGAYSLVMEPKQLVLQYKGMNSPKPLVYFKSSVWPSTQDGTLQTVTLNVEETSDGFAYYVLLDYTVANSSSGTGNLILTRPKYNSTLSILRLGIDGNLRVFTYYDKVDLQAWEETFTLFSRDSIWGTECELPERCGNFGLCEENQCVACPSPNGLLGWSRNCQPKKVNCRPNGFSYYKLEGVDHFMSQYNEGEGIKESDCGRKCTSDCKCLGYFYHRETSKCWTANELKTLAKA…	87.29	0	gi|383932356|gb|AFH57275.1|	epidermis-specific secreted glycoprotein EP1-like protein [Gossypium hirsutum]	-
5847	CotAD_26766	8804.5	0.317	2|1|1	11|5|10	1.49	0.007	0.001|0.001|0.001	CotAD_26766	MSQTVVLKVGMSCEGCVGAVKRVLGKMQGVESYEVDLKEQKVTVKGNVQPDAVLQTVSKTGKKTTFWEGEAPAEAETKPATA	94.03	4e-40	gi|47176684|gb|AAT12488.1|	copper chaperone [Populus alba x Populus glandulosa]	-
5850	CotAD_08921	26377	0.251	4|2|5	8|3|9	2.54	0.041	0.009|0.021|0.001	CotAD_08921	MANHPVFFLVYLLALATSLHSSTAVDYTVTNEVPTTPGGTVFDKELGVEYTRQQMESASQFIWNLFRQPDPASRKNVQSVSLFIVDNLDERVVALASNNNINVSDKSIQGLTGDELKRSFNGVLYHEMTHIWQWNGNGQIGDGHLGNLTEGVADFVRLKADYVPGGWPRPGDGEHWYDGYAVTAYFLDYCEGLKSGFVAELNAKLKDGYSPDFFFQILGKTVDQLWTDYKNIPRN	57.14	2e-81	gi|462396128|gb|EMJ01927.1|	hypothetical protein PRUPE_ppa018700mg [Prunus persica]	-
5858	CotAD_29462	34337.2	0.035	-|-|1	-|-|3	1.68	-	-|-|0.047	CotAD_29462	MLMSRALSRVSRSVGARSLLLSAPKSFQSPSLSTQFHSLVSESPNKVITNGVCLLHHSNLHWNAFRRFGISSSASPEPSEKEHGSAVDNNGQDPVKPSEDTNPGEAEATKESDSESDGDLSMADMVKLVEEKEELLKTKQTEIEQMKDKVVRTLAEMENVMARTRREAENSKKFAIQNFAKGLLDVADNLGRASTHVKGSFSKIDESNDTAGAVPLLKTLLEGVEMTEKQLGEVFRKFGVEKFDPRNEPFDPHRHNAVFQIPDNSKPPGTVAHVLKAGYMLYDRVIRPAEVGVTQATDDGATENNTGDKVSDV	66.24	2e-121	gi|255580752|ref|XP_002531197.1|	Protein grpE, putative [Ricinus communis]	aq_433
5860	Cotton_D_gene_10002650	40025.6	0.085	1|-|1	3|-|1	1.88	-	0.003|-|0.300	Cotton_D_gene_10002650	METIVFPFSSKFLLAKYLLVFALFISAKALIKLSINETIPAVIVFGDSIVDAGNNNDLNTVIRCDFLPYGQDFAGGVPTGRFCNGKVPSDLIAEELGIKDIVPAYLDPKLKPQDLLTGVTFASGGTGYDPLTPKLASVISLGEQLNYFKEYIGKLKAIAGEEKTNFILAKSMFLVVAGSDDIANTYFVLRARQLQYDVPAYTDLMVNSAAEFVKELYGLGARKIGVFSTPPIGCVPSQRTLGGGIERECAEDYNVAAILFNKKLSSVLNSFKTSMPDGRFVYIDVYNPLLGLIQNPQKNGFEVVDNGCCGTGNIEVAILCNKLSPSTCTDVSKYIFWDSYHPTEKAYRALVTPILQNIIGDFF	66.67	0	gi|224065755|ref|XP_002301955.1|	predicted protein [Populus trichocarpa]	all3634
5861	CotAD_50486	16044.3	0.184	2|3|1	6|10|4	1.11	0.006	0.042|0.352|0.847	CotAD_50486	MEQPAAPNAVPQKLSDRDSSSKAKRKIPTPQELISHYQNQGLDSQEASIKVIEDLQNVVMRVVSSNSKPKKDKFLIETSRKIDSVNTRLAVVDMKLDSKPGYLETFAIGVASGAAFNGICSVLPHVFEGFAQIWSSVRTATKPSSSP	69.18	2e-63	gi|224109954|ref|XP_002315368.1|	predicted protein [Populus trichocarpa]	-
5862	CotAD_53055	15222.3	0.531	1|1|1	4|6|2	1.4	0.007	0.001|0.015|0.024	CotAD_53055	MAFSSKLGSLLRQNGQTPMISSMLNTLRCMSTSTKKLFIGGLSYGTDDQSLKEAFSGFGDVTEARVITDRDTGRSRGFGFVNFADDESASNALSAMDGQELQGRNIRVSYANERPSGPRSFGNNGGFGGSRGFGGGSRDDSSF	74.58	1e-53	gi|255563618|ref|XP_002522811.1|	glycine-rich RNA-binding protein, putative [Ricinus communis]	ECU03g0730
5865	CotAD_17699	35885.4	0.215	-|1|1	-|1|2	2.8	-	-|0.001|0.001	CotAD_17699	MAATFFRRLSKATPATFNNAFRGQPKSGFAGFRFCTIAAVAGGISTYYCFSDSNLVHLDQVNEETGPKVALKSDKWLEFKLQDTARVSHNTHLFRFSFDPSAKLGLDVASCILTRAPLGQDAEGKTKYVIRPYTPISDPDAKGYFDLLIKVYPEGKMSQHFASLKPGDVVEVKGPIEKLRYSPNMKKHIGMIAGGTGITPMLQVIEAILKNPDDKTQLSPLYANVSPDDILLEQKLDILAASQPNLKVFYTVDNPTKTWKGGAGFISKDMVTKGLPGPAADTLILVCGPPGMMEHISGDKAKDYSQGELTGILKELGYTEQMVYKF	80.98	0	gi|225445442|ref|XP_002285073.1|	PREDICTED: NADH-cytochrome b5 reductase-like protein [Vitis vinifera]	PA2514
5879	Cotton_D_gene_10035300	41660.9	0.19	1|1|1	4|3|2	1.36	0.016	0.001|0.222|0.319	Cotton_D_gene_10035300	MAEPATATQAAAPAVPQLKDELDIVIPTIRNLDFLEMWRPFFQPYHLIIVQDGDPSKTIKVPDGFDYELYNRNDINRILGPKASCISFKDSACRCFGYMVSKKKYIFTIDDDCFVAKDPSGKAINALEQHIKNLLSPSTPFFFNTLYDPFRDGADFVRGYPFSLREGVPTAVSHGLWLNIPDYDAPTQLVKPLERNTRFVDAVLTIPKGTLFPMCGMNLAFDRELIGPAMYFGLMGDGQPIGRYDDMWAGWCTKVICDHLGLGVKTGLPYIYHSKASNPFVNLRKEYKGIFWQEEIIPFFQQTVLPKDCTTVQKCYIELAKQVKEKLSKVDPYFDKLAEAMVTWIEAWDELNPTGSSVTNGKAK	93.45	0	gi|224120656|ref|XP_002330919.1|	predicted protein [Populus trichocarpa]	-
5890	CotAD_28679	58039.7	0.341	1|1|1	2|3|3	1.66	0.016	0.001|0.001|0.001	CotAD_28679	MAARRISSLLSSSATSLGRFSSWGRRIKSFSTAAAAAIDEPIHPSIQIDHTQLLINGQFVDAASGKSFPTVDPRTGDVIARVAEGDLEDVNRAVAAARKAFDEGPWPKMTAYERSRIMLCFADLLEKHTEEVAKLETWDNGKPYEQAAKIEIPMVVRMFRYYAGWADKIHGFTVPADGQHHVQTLHEPYGVCGLIIPWNFPLLLYSWKVGPALACGNTVVLKTAEQTPLSAIYVSKLFHEAGLPPGVLNVVSGFGPTAGAALSSHMDVNKLSFTGSTATGKIVLALAAKSNLKPVTLELGGKSPFIVCKDADVDKAVELAHSALFFNQGQCCCAGSRTLVHESVYDEFVEKAKARALKRVVGDPFKMGIEQGPQIDNEQFKKILKYIRSGIESGATLES…	82.03	0	gi|225452510|ref|XP_002274863.1|	PREDICTED: aldehyde dehydrogenase family 2 member B4, mitochondrial [Vitis vinifera]	betB
5895	CotAD_44862	45113.4	0.06	1|1|1	1|1|1	1.5	0.005	0.019|0.049|0.466	CotAD_44862	MYGQDGGEAAPPSYGGGYGGSGGYGGGGGGYGGGGRGGSGGHGGRGGGGRGGGGGYGGGYQNRGGGGGYQGGERAGRGGGGRGGGRGGSGRDGDWLCPNPSCGNLNFARRVECNKCGAPSPAGAGGDRGSGSTGGGYSRGGGGGYGGNRGGRDGGRGGYDSGRNNNYDGGRGGNNDNRSSGSRGGSYGSSQGGEDSGYGQVPPPAPNSYGGNYPPAPNAYGGNANYGMDSVPPPTSYTGGPTSYPPSYGGPAGGYAGEGLSDARTGGRGGPPGGYDGGYGSGGPRNQGGGYGGPPVEAPAKIKQCDGNCGDSCDNSRIYITNLPPDVTIEEIRDLFGGIGQVGRIKQKRGYKDQWPWNIKIYTDEKGNQKGDAVLSYEDPQAAHSAGSFFHNHVMRGYS…	74.23	6e-67	gi|224055383|ref|XP_002298497.1|	predicted protein [Populus trichocarpa]	-
5903	Cotton_D_gene_10024103	80983.4	0.087	3|-|-	7|-|-	1.31	-	0.009|-|-	Cotton_D_gene_10024103	MGSYDITGPAADVNMMGYANTEQIASGIHFRLRARSFIVAEPQGKRVVFVNLDACMASQLVTIKVLERLKARYGNLYTEQNVAISGIHTHAGPGGYLQYVVYIVTSLGFVRQSFDALVDGIEKSIVQAHENLQPGSIFVNKGELLDAGVNRSPSAYLNNPASERSKYKYNVDKEMTLLKFVDDQWGPVGSFNWFATHGTSMSRTNSLISGDNKGAAARFMEDWFEQNSAKSDELGTDEIPRRVSSIISSIHNNHHELLELASSFQSSPGKPATRVSSAARHVRSALRQADKPGFVSAFCQTNCGDVSPNVLGAFCIDTGVPCDFNHSTCGGKNELCYGRGPGYPDEFESTRIIGERQFNKAVDLFNTASEQLKGKVDYRHSYVDFSQLEVTIPKEGGGS…	86.28	0	gi|255558846|ref|XP_002520446.1|	ceramidase, putative [Ricinus communis]	-
5909	CotAD_03880	18787	0.149	2|-|-	9|-|-	1.32	-	0.002|-|-	CotAD_03880	MAFLSKIGSILRQTTSMHVNAELSASRPGLFQVLRSMSTSPSSKLFVGGISFQTDDQSLREAFSKYGEVIDARIIMDRETGRSRGFGFVTYASSEDASSALQALDGQVLHGRQVRVNYANERPPRNFGGSTGYGGDSMGFGGGEDGYKGGAYDGNDALNDNSRDEDESGDFVKRA	72.36	1e-60	gi|255633638|gb|ACU17178.1|	unknown [Glycine max]	YCL011c
5926	CotAD_01776	113979	0.215	11|12|10	36|19|32	1.62	0.03	0.001|0.001|0.001	CotAD_01776	MAVHGAWILILVTLMSIWCVEPKYIIYNTTSKIVPGKLNVHLVAHTHDDVGWLKTVDQYYVGSNNSIQGACVQNVLDSIVPALLADKNRKFIYAFFQRWWRDQSETVQETVKRLLNSGQLELINGGMCMHDEAAPHYIDMIDQTTLGHRFVKREFNITPRIGWQIDPFGHSAVQAYLLSAEVGFDSLFFARIDYQDRAKRKDQKSLEVVWRGSKSLGSSSQIFAGAFPENYEPPSNFYYEVNDDSPIVQDNMELFDYNVPQRVNEFVAAAFSQANITRTNHVMWTMGTDFKYQYAHTWFRQMDKFIHYVNQDGRVNALYSTPSIYTDAKYATNEAWPLKTDDYFPYADRINAYWTGYFTSRPALKGYVRTMSGYYLAARQLEFLKGRSKAGPNTDYLAD…	76.96	0	gi|462406141|gb|EMJ11605.1|	hypothetical protein PRUPE_ppa000755mg [Prunus persica]	BH0791
5927	Cotton_D_gene_10011978	86846.7	0.121	1|3|2	1|5|4	1.36	0.241	0.758|0.001|0.005	Cotton_D_gene_10011978	MTIKPAVRISERKLVVKERTILTGVPENVIATSGTAAGSVEGVFLGAVFDEENSRHVVPIGTLRDVRFMSCFRFKLWWMAQKMGDQGKDVPLETQFLLVETKDGSHLDSTEENQIVYTVFLPLIEGPFRAVLQGNQNDQLELCLESGDADTKASSFTHSVYIHAGTDPFTTITEAIRAVKLHLKTFRQRHEKKLPGIVDYFGWCTWDAFYQDVTQEGVEAGIESLAAGGTPPKFVIIDDGWQSVGGDAREEDKASSSADQAETKQQPLLRLTGIKENEKFQKKDDPTVGIKNIVNIAKEKHGLKYVYVWHAITGYWGGVRPGVEEMEGYGSRIRYPMVSKGVVDNEPGWKTDAIAVQGLGLVNPKNVYKFYNELHSYLADAGIDGVKVDVQCILETLGA…	79.82	0	gi|359484223|ref|XP_002285418.2|	PREDICTED: probable galactinol--sucrose galactosyltransferase 6-like [Vitis vinifera]	-
5944	Cotton_D_gene_10008766	55194.4	0.189	8|9|9	44|27|30	1.41	0.002	0.001|0.001|0.001	Cotton_D_gene_10008766	MGFSRKEYEFLSEIGLSAGNLGCFVNGTWKGSGPVVSTLNPAHNQKIAEVSEASIQDYEEGMQACSEAAKIWMQVPAPKRGDIVRQIGDALRSKLQQLGRLVSLEMGKILPEGIGEVQEIIDMCDFAVGLSRQLNGSVIPSERPNHMMLEMWNPLGIVGVITAFNFPCAVLGWNACIALVCGNCVVWKGAPTTPLVTIATTKLVAEVLEKNNLPGAIFTSFCGGAEIGEAIAKDRRINLVSFTGSSKVGVKVQQTVNERFGKCLLELSGNNAIIVMDDADIKLAVRSVLFAAVGTAGQRCTTCRRLLLHESIYRTVVDQLLDVYKQVKIGDPLEKGTLLGPLHTSSSRKNFEKGIEIIKSQGGKILTGGGIIESEGNFVQPTIVEISPDANVVKEELFA…	90.35	0	gi|449447906|ref|XP_004141707.1|	PREDICTED: aldehyde dehydrogenase family 7 member B4-like [Cucumis sativus]	CC0822
5945	CotAD_67342	36974.4	0.158	-|3|1	-|6|1	2	-	-|0.002|0.886	CotAD_67342	MYRFPWVLLLVAAVNMAVAAEPLRPGFYSETCPPAEFIVRDVMKKAMIREPRSLASVMRLQFHDCFVNGCDGSLLLDDTADMVGEKQALSNINSLRSFEVVDEIKEALEDACPSTVSCADILVLAARDAVALSGGPNWEVRLGRKDSLTASQQDSDNIMPSPRADATSLINLFAQFNLSVKDLVALSGSHSVGKARCFSIMFRLYNQSGSGKPDPTIEPEFREKLNQLCPLGVDENVTGPLDATPRVFDNQFYKDLVGGRGFLNSDQTLFTSRRTRPYVRVFSKDQDEFFKAFVEGMLKMGELQFEQPGEIRTNCRVVNGRPVDVLMSY	99.39	0	gi|315307488|gb|ADU04148.1|	gaiacol peroxidase [Gossypium hirsutum]	-
5948	Cotton_D_gene_10005437	37408.9	0.127	-|3|-	-|14|-	1.71	-	-|0.001|-	Cotton_D_gene_10005437	MVQEKKLVQDVSGWLRVYDDGSVDRTWTGPPEVKFMAEPVSPHEQFIDGIATRDVTIDQNSGLRARIYLPEEENPKFPIILHFHGGGFCISQADWFMYYQFYTRLAKSIPAIVVSVYLRPAPENKLPAACDDGYAALLWLKSLSKGESNEPWLNTHGDFNRVFLIGDSSGGNIVHEVATRSGFIDLNPLRLAGAIPIHPGFVRAQRSKSELEQPESPFLTLDMVDKFLALALPNGCTKDHPITCPMGSFAPPIETLSLPPLMYCVAEKDMIKDTEMEYYELLKKANKDVELFISTEMGHSFYLNKIAIDTDPVTAAQTGELIEGIKVFINKH	73.59	0	gi|255569153|ref|XP_002525545.1|	catalytic, putative [Ricinus communis]	BH2806
5956	CotAD_11243	68661.4	0.228	5|5|5	21|27|32	3.64	0.014	0.001|0.001|0.001	CotAD_11243	MSLPRFIVLKSPGAETYLGSKQDNGEYKGYAEFTETKVVSANAKFEVEFAKDGLVHIRSSTTNKYLKRTHNPSITGKPNEEYWITITADKPEEDQSKESCTLFKPIFEDPVYENCRFVHVQSGCYLYLWPLATSELGRGVLANKNHFAANGDDIFEVIDWESLVILPRYVAFKGNNDMFLRLTQVEGHPYLEFSGADVGAGSVPMEVFYMKNGDIRIKPVSSDKFWRRSPNWIWADSNDTKGTDKDTLFRAFKVDSKTIALLNFGNNNFCKRLTTEGKTSCLNAAVPSITREAFLMVQEPVLSRQIYNLRYDTENARVYNEKVLVVAKNSATNRTTQANTLDNGDIRIKPVSSDKFWRRSPNWIWADSNDTEGTNKDTLFSAFKVDSKTIALLNLGNNN…	38.12	1e-123	gi|297744329|emb|CBI37299.3|	unnamed protein product [Vitis vinifera]	-
5990	CotAD_31327	52189.5	0.149	1|1|1	3|10|7	1.13	0.014	0.909|0.036|0.506	CotAD_31327	MAMLLLMMFTLSSALDMSIISYDEGHPDKSKSKSSWRTDDEVMVMYEEWLVKHGKAYNGLGEKERRFKIFKDNLRFIDEHNVDESHSFKVGLNRFADLTNDEYQAMYLGTKKSSNKVSKKSNRYAPRVGEELPASIDWREKGAVVPVKDQGSCGSCWAFSTVGAVEGINQIVTGDLISLSEQELVDCDTSYNEGCNGGLMDYAFEFIIKNGGIDTEEDYPYTGHDGRCDSYRQKTAKVVTIDSYEDVPQNNEGALKKALANQPVSVAIEAGGRAFQLYASGIFNGICGTQLDHGVVAVGYGTENGKDYWIVRNSWGNQWGEEGYIRMERNLANTATGKCGIAIEASYPIKNGQNPPNPGPSPPSPIKPPTVCDNYYSCPESNTCCCVYEYYGYCFAWGC…	76.64	0	gi|224136808|ref|XP_002326950.1|	predicted protein [Populus trichocarpa]	MA2507_1
6001	Cotton_D_gene_10007790	39848.7	0.02	-|1|1	-|3|1	3.37	-	-|0.024|0.054	Cotton_D_gene_10007790	MDGNNFIFFLTICVLSWRMELLKAQMVPAVYVFGDSLVDVGNNNFLPVSFAKANFPHNGVDFPTRKPTGRFCNGKNAADLLAEKLGLPSSPPYLSLSVNNITSHLTGASFASGGAGIFNSTDHVFGQAIPLSNQVDDFMSLNKILMKQGSSAAQNHTSKSLFAFVIGSNDLFDYFGSPNLRKQNTPQQYVDLMVTTLKQQLMRLYAVGARRFFLGGVGAIGCIPVERVKNKSHGCNAEHNFWAVKYNDGLKAMLNELKSKLRGFNYSFFDTYGIMQTITQNASTYGFNETEAACCGLGELRAIVPCLPFVTQCSNRTDHMFWDLYHPTEATTGIVVDTLFDGPSQYCVPINVRQLVSG	61.25	5e-141	gi|224116598|ref|XP_002317343.1|	predicted protein [Populus trichocarpa]	XF0781_1
6008	CotAD_48043	17089.4	0.212	2|2|2	24|26|22	1.19	0.006	0.169|0.036|0.001	CotAD_48043	MEMIQYNRFTAHLLLLSLILVVPLAVATDVQYCDKQGEYDVKVQGVEISPNPIARGQPATFSIAATTGAAIDGGKLVIEVAYFGWHIHSETHDLCDETSCPVSTGDFVVSHSQVLPGYTPPGPYSLKMKMFDANKRELTCIGFDFSIGFASSVADS	79.84	8e-68	gi|255566183|ref|XP_002524079.1|	Phosphatidylglycerol/phosphatidylinositol transfer protein precursor, putative [Ricinus communis]	-
6033	CotAD_68164	17788.1	0.541	4|3|4	7|6|12	1.2	0.001	0.024|0.163|0.007	CotAD_68164	MTKDRQIGVAMDFSKGSKAALKWTIDNLVDKGDTLYLIHVKPNQSDESRNLLWSTSGSPLIPLSEFREKEVMKHYEVEPDPEVLDLVDTASRQKEVNIVTKIYWGDARDKICESVADLKLDCLVMGSRGLGTIQRVLIGSVSNHVMVNATCPVTIVKGS	92.36	1e-104	gi|166203457|gb|ABY84681.1|	universal stress protein 1 [Gossypium arboreum]	all1590
6035	CotAD_07795	98499.7	0.317	1|1|1	4|2|6	1.43	0.21	0.413|0.359|0.024	CotAD_07795	MLFRLGIFLSLLSLFLIRSESAVSSIDLGSEWLKVAVVNLKPGQSPITIAINEMSKRKSPALVAFQSETRLLGEEAAGILARYPDKVFSNLRDMIGKPYQDVKRSADSMYLPFDVVEDSRGAAKIRVSSDVSYSVEELLGMILKYASNLAEFHSKVTVKDAVISVPPYFGQAERKGLLKAAEMAGINVISLINEHSGAALQYGIDKDFSNESRHVILYDMGSSSTYAALVFYSAYNSKEFGKTVSVNQFQVKDVRWDSELGGQNMELRLVEYFADEFNKQVGNGVDVRKHPKAMAKLKKQVKRTKEILSANTAAPISVESLYDDRDFRSTITREKFEELCADLWDKSLVPVKEVLKHSGLKADDIYAVELIGGATRVPKLQATLQEYFGRKDLDKHLDA…	77.31	0	gi|255559152|ref|XP_002520598.1|	Heat shock 70 kDa protein, putative [Ricinus communis]	RC0233
6049	CotAD_12991	33010.7	0.184	3|5|4	45|51|50	1.7	0.023	0.001|0.001|0.001	CotAD_12991	MASRSCLFIFLLLLAFQSSVIKANTVAVLPPQCRPIVAGTLARFEYLVNFIIGYAEFLLRSSTGAGIEDIAPGLVQGPVPIGATVANLDNATRAAIREFGLALVGNLRAIVDETLLRAPLSRPQLNFTAGVFAGILNLSGLTPPFNVYGSTTQFLLVAEPLTSSLLQFYLAQVTPSIAGNDQQQLAAGIGLTAAAQAGYFRTRLNAIVNSPVPPYTMTVANFTNTTATAVNQLGLCGVKNEGLIVPLSLGAENRTTTNVVPGDVNSLSPRRTEREVLRIVFGTRNATRPGGIFLSFNGALFRQLVALRQS	38.1	2e-39	gi|255582162|ref|XP_002531875.1|	conserved hypothetical protein [Ricinus communis]	-
6050	Cotton_D_gene_10003286	37986.7	0.22	-|5|5	-|14|14	1.65	-	-|0.001|0.001	Cotton_D_gene_10003286	MVNAILYHQTSPLLLFQCCSSSHPPHIPRGLPGKLTLNFSIKSPPNKAIASHIVSGLASLIFLSQTNQVLAADLSHDPSICQLASATDNELTLPLEEDSGEGNGKLMMMRGMTAKNFDPVRYSGRWFEVASLKRGFAGQGQEDCHCTQGVYTFDMKTPAIQVDTFCVHGGPDGYITGIRGKVQCLSDEDLVKNETDLEKQEMIKEKCYLRFPTLPFIPKEPYDVIATDYDNFSLVSGAKDTSFIQIYSRTPNPGHEFIEKYKSYLSNYGYDPSKIKDTPQDCQVMSNSQLAAMMSMPGMQQALTNEFPDLELKAPVAFNPFTSVFDTLKKLLELYFK	78.3	0	gi|255563999|ref|XP_002522999.1|	protein with unknown function [Ricinus communis]	-
6061	Cotton_D_gene_10037394	14132	0.305	1|1|1	21|11|16	1.25	0.007	0.003|0.002|0.001	Cotton_D_gene_10037394	MSWQAYVDDHLMCDIEGNHLSAAAIIGQDGSVWAQSSNFPQFKPEEITGIMNDFAEPGSLAPTGLYLGGTKYMVIQGEPGAVIRGKKGPGGVTVKKTNLALIIGIYDEPMTPGQCNMIVERLGDYLIDQGL	94.66	3e-78	gi|388500382|gb|AFK38257.1|	unknown [Lotus japonicus]	-
6087	Cotton_D_gene_10035242	37784.5	0.185	4|4|5	13|13|12	1.41	0.015	0.001|0.001|0.001	Cotton_D_gene_10035242	MNSLTLKPSSFVLQSSFTVFSSYDKSKQSFPSVRFPTNIKSNTRLGLRIKAYDSSKSDDASKPNGDSKPPNGTLKNQQPKARRDILLEYVKNVQPEFMELFVKRAPQQVVEAMRQTVTNMIGTLPPQFFAVTVTTVAENLAQLMYSVMMTGYMFKNAQYRLELQQSLEQAALPEVQEKKDVPDYAPGTQKNVSGEVIRWNNVSGPEKIDAKKYIELLEAEIEELNRQVGRNSANGPNELLEYLKSLEPQNLKELTSSAGEDVVFAMNTFIKRLLAVSDPDQMKKSVTETSAPELAKLLYWLMVVGYSLRNIEVRFDMERVLGTPPKLAELPPGENI	83.33	4e-165	gi|358248580|ref|NP_001240161.1|	uncharacterized protein LOC100815202 [Glycine max]	-
6094	Cotton_D_gene_10022769	33524.3	0.409	5|6|1	145|112|1	1.03	0.441	0.001|0.001|0.325	Cotton_D_gene_10022769	MADSCCLVCIPSLFTTCSKSPSILSFPPKRINLLLSSSHSSTSLTLKTKAHFSSLVSFVAQTSDCAQQEEENDATITIDDEESGIEAKWENDESDGPEGEDAVFEEQSGDSEEEGSEPSEEAKLFVGNLPSDVDSQSLAMLFEKAGTVEIAEVIYNRDTEQSRGFGFVTMSSIEEAEKAVEQFNRYDLNGRLLTVNKAAPRGSRLDRPPRVFERAFRVYVGNLPWDVDNARLEQVFSEHGKVVEARVVYDRETGRSRGFGFVTMSSETELNDAIAALDGQSLDGRAIRVNVAEERPRRGFF	63.89	8e-125	gi|255540443|ref|XP_002511286.1|	ribonucleoprotein, chloroplast, putative [Ricinus communis]	SPAC19A8.13
6097	CotAD_30730	37567.2	0.113	1|3|2	1|19|13	1.22	0.001	0.771|0.001|0.001	CotAD_30730	MSFQESGPSVAVVGVTGAVGQEFLSVLSDRDFPYRSLKLLASKRSAGKSISFQDRTFTVQELTSDSFNNVDIALFSAGGSISKEFGPIAVEKGAIVVDNSSAFRMVDGVPLVIPEVNPEAMDGIKVGMKKGALIANPNCSTIICLMAATPLHRRAKVTRMVVSTYQAASGAGAAAMHELELQTREVLEGKPPTCNIFKQQYAFNLFSHNAPVLENGYNEEEMKMVKETRKIWNDADVKVTATCIRVPVMRAHAESVNLQFEKPLDEDTAREILKNAPGVIVIDDRISNHFPTPLEVSNKDDVAVGRIRQDLSQEGNQGLDIFVCGDQVRKGAALNAVQIAELLL	88.08	0	gi|255584961|ref|XP_002533192.1|	aspartate semialdehyde dehydrogenase, putative [Ricinus communis]	Cgl0253
6101	CotAD_16218	13692.7	0.336	3|4|4	18|21|17	1.26	0.002	0.001|0.001|0.001	CotAD_16218	MVQRLTYRTRHSYATKSNQHHVVKTPGGKLVYQTTKKRASGPKCPVTGKRIQGIPHLRPAEYKRSRLPRNRRSVNRAYGGVLSGSAVRERIIRAFLVEEQKIVKKVLKIQKTKEKQSSK	96.84	5e-62	gi|356498266|ref|XP_003517974.1|	PREDICTED: 60S ribosomal protein L34-like [Glycine max]	MK0023
6105	CotAD_65745	24508.7	0.028	1|-|1	4|-|4	1.52	-	0.005|-|0.025	CotAD_65745	MSEKAYNRSFNSLQNGLNIKTKLDIRELGIQFGCVRLIPFVKKGLSLYKDRFLASLPSSRQANADFTRPVFTAVAFYLCAKKHKLKIDKVRLIEVCGTSESEFSCVSTSMKDLCHDVFGISSEKKDPKEVKGNRELLDVLPEKRKFGDGGYLSDEGPELSSYKRAKKMEKAGYEEWKSSVLSSNKKSTKALCKRTTQTSLDFLKEVSEAKELKAA	80	2e-122	gi|255562834|ref|XP_002522422.1|	Origin recognition complex subunit, putative [Ricinus communis]	-
6106	CotAD_15429	42636	0.351	1|1|1	7|3|4	1.3	0.029	0.024|0.462|0.053	CotAD_15429	MSKLVVLQPTKQPPISLLSSSLSHFNGTKLCQIQYKRKVYQPKGALHIAASSTKKILIMGGTRFIGVFLSRLLVKEGHQVTLFTRGKAPVTQQLPGESDSDYAEFKSKILHLKGDRMDFDFVKSSLSAEGYDVVYDINGREAAEVEPILDALPNLEQFIYCSSAGVYLKSDMLPHCETDAVDPKSRHKGKLNTESLLESRDVNWTSVRPVYIYGPLNYNPVEEWFFHRLKAGRPIPIPNSGVQITQLGHVKDLATAFIEVLGNEKASKQVFNISGEKYVTFDGLAKACAKAGGFPEPEIVHYNPKEFDFGKKKAFPFRDQHFFASVEKAKHVLGWKPEFDLVEGLTDSYNLDFGRGTFRKEADFSTDDMILGKSFVLQS	85.53	0	gi|312282041|dbj|BAJ33886.1|	unnamed protein product [Thellungiella halophila]	MA2186
6108	CotAD_20021	52681.6	0.169	1|1|1	2|1|2	1.33	0.002	0.406|0.049|0.001	CotAD_20021	MKSGKWVGFVTLLLHVCFSGADKIVALPGQPKVSFQHFSGYVTVHDEKPHRQRALFYYFVEAETMPASKPLVLWLNGGPGCSSVGAGAFIEHGPFKPNGKTLTKNVHSWNKEANMLYLESPAGVGFSYSANNSFYTDLNDEVVARDNFVFLERWLLIFPQYKNRDFYITGESYAGHYVPQLTLHIIHSNLKLNLKGIAIGNPLLEFVTDMNSADQYYWSHGLISDSAYELLLSFCNSSRLMREALTQSFSSDCLSVYGEVAKELGKSVDKYDVIADVCLSSGQSSMAIFSHPMFLGPQFSSSLHSQVDGFSQQQVKVEADPCIEDKTTKYLNRKDVQKALHAKLVGITSWNLCNKIVQYMDDLETPTIYTVGKIVKSGIPVMVYSGDQDSVIPFTGTRN…	66.52	0	gi|224147855|ref|XP_002336553.1|	predicted protein [Populus trichocarpa]	XF1282
6112	CotAD_62123	158453	0.015	-|-|1	-|-|1	10	-	-|-|0.012	CotAD_62123	MSVIGEAALSGFLELLWGRLLDSALNFVADHKQVQQQLKQWQSILPDIQAVLNDAEEKQIRNKGVRNWLEDLQDLAYDMDDILDEFAYEELRLALLKTQAQASISKVRKLVPTCCTSSNFSPTSFLFNNSMIPKMKEITARLDSLTTRRSSLGLSEILSQGATSKGKKPRLQPTSVVDEAVEYVGRDNEKRKMLDLLKSNNSNGVFVLSIVGMGGMGKTTLAQLVYNDASIKESFDHKAWVCVSDEFDAVNITKTILQSITSEPCTYNDLNLLQVKLKEKLSGKKFLLVLDDIWNESYEDWTILRSPFGAGTKIIVTTRIQNVSSNVDPVKAFHLDKLSHDDCLSIFTQHALKARNFNGHLQFKEVGENIVRRCNGLPLAAKAIGSLLRTVKDLGEWEK…	42.22	0	gi|225449649|ref|XP_002262753.1|	PREDICTED: putative disease resistance protein At3g14460 [Vitis vinifera]	alr0124_1
6113	CotAD_58615	27519.8	0.105	1|1|2	5|1|3	1.46	0.002	0.022|0.527|0.120	CotAD_58615	MVKLTADLIWKCPHFFNALKERELDLRGNKIAVIENLGATEDQFDTIDLSDNEIVKLDNFPYLKRLGTLLINNNRVTRINPNIGEFLPNLHTLVLTNNRLVNLVEIDPLSSLPKLQFLSLLDNNITKKPNYRLYVIHKLKSLRVLDFKKVKAKERLEAENLFASKEAEEEIKKESTKTVAPKEVPNVSEVAEEEQMPKVVAPTPEQILAIKRDLRELYPGQDEIKEMIEIKGKMEEPAF	100	4e-120	gi|295687235|gb|ADG27843.1|	U2 small nuclear ribonucleoprotein A [Gossypium hirsutum]	YPL213w
6118	CotAD_52763	100130	0.124	3|3|3	17|23|25	1.73	0.019	0.001|0.001|0.001	CotAD_52763	MASRFKLAFALSLLLQLLDFCRGSKVGVAYGRNANNLPPPDQVAQLVEKHNIQYLRIYDSDPKVLKAFSNTSIELMVGVRNADLSAFQSQSYVDSWLRNSILPYYPATNITHITVGIEMIDSLDNATNLVVPAMRNVVFALKTANLQDRIKVSTPLPFGVLSKSYPPSEGAFSSSYENVLRPLLDFLEENQSPFMVDLYPFYAMINGNSSLDYVLFKSSSSIFVDPNTGLSYNNIFDAQLDAFHFALANLNFSRMKIIVTETGWPTRGSPYASIDNAQTYNTNLIRQFMDGPGTPAMPGVNLYVFIFTLFSENLNPGPETERNFGIFYPDMSSVYNLGFPDKGGRSWCIASSQALDSDLQYLLNWACILGKANCSAIQPGQQCFEPDTLFSHTSFAFNN…	60.44	1e-177	gi|225445059|ref|XP_002283473.1|	PREDICTED: glucan endo-1,3-beta-glucosidase 13 [Vitis vinifera]	-
6125	CotAD_08608	76174.4	0.112	4|-|4	11|-|8	1.22	-	0.202|-|0.001	CotAD_08608	MSSKYQILDNRPIDQWKVTELKEELKRRKLTTRGLKEELVRRLDEAVRLERENGETEEDNGFNSDPQPTDERGIEKAIPVIVETVKDDVDHSGREIEKESGVKVHVDINESAAALGHEGVQGSDSLVEKELVSETTTIQTEITVTKNVVSEVPSTEKESSGQNENVNTDIKVEGKDPKLQFETDDPKPEVENDDPKGKLQGSNPQLESDDSKPQLDIEDSKVQLENGGLKVPHEDDVHDSSAPNIQVSEVSPDLGLQVKSDSISTDSVSNNEKIELKDNILADNVKLDLDVVKPEMVEPSSSNVVPISGESHPMDVEDPPENKAPVDERDGKNVTNVDLGNKNDSAEMTYSEKLNLDRSSGDDSMEEDMLESKQIDSKCSTDEMGDKSENNGAPIIKEK…	54.73	0	gi|462403970|gb|EMJ09527.1|	hypothetical protein PRUPE_ppa002551mg [Prunus persica]	-
6130	CotAD_58511	27209.5	0.188	2|3|3	6|9|7	1.42	0.021	0.022|0.001|0.003	CotAD_58511	MDSSLTDQQQDKYRSYLHGEGGKNTNWKLGAPPNYDTVNKLFEEGRTKIWPPASLEEKVRNLVKTWEMEMFNKISFPDYKSVKLQNFTVSVNGRKPLSLEESRKLGGGYNSFMQTTLPENLRGYNPAQETEHSSHLAFTTAFPRGFALEVSQVYSGPPTIVYKFRHWGYMEGPFKGHAPTGELVQLYGISIFEVDDEMKILKVEFFFDRGELLGGLMKGEKLASGTDQAALSCPFMRNTG	74.14	6e-122	gi|224082406|ref|XP_002306682.1|	predicted protein [Populus trichocarpa]	-
6154	Cotton_D_gene_10030150	104998	0.119	-|-|6	-|-|48	1.34	-	-|-|0.001	Cotton_D_gene_10030150	MSFTISLLSLTLSSFRLLLVLISCFSGGYSSSSSSAAPTRIGKGYRLISIEDTSDGGFLGHLQVNQKNNFYGPDIPLLQLYVKHESENRLRVHITDAEKQRWEVPYNLLPRDQPPKPKQAIGRSRKKPISVLEIAGSELIFLHTVDPFSFAVTRRSNGQTLFNSSSGGGDSFGEMVFKDQYLEISTQLPEDASLYGLGENTQPHGIKLYPNDPYTLYTTDVSAINLNTDLYGSHPVYMELRNVGDKPYAHAVLLLNSNGMDVFYRGNSLTYKLIGGVFDFYFFVGPTPLDVVDQYTSFIGRPAPMPYWSLGFHQCRWGYHNLSVVEDVVENYKKAKIPLDVIWNDDDHMDGHKDFTLNPINYPRPKLLAFLEKIHSIGMKYIVLIDPGIGVNSSYGVYQ…	82.22	0	gi|255581663|ref|XP_002531635.1|	alpha-glucosidase, putative [Ricinus communis]	lin2538
6176	Cotton_D_gene_10026923	55165.1	0.358	8|8|7	23|35|27	1.58	0.003	0.001|0.001|0.001	Cotton_D_gene_10026923	MKSLLFQFILVPFVILNFVNNVNAGITSRFVREEWPSVDIPLDHEVFAVPKGYNAPQQVHITQGNYDGNAVIISWITFDEPGSSKVQYGKSDKNYEFSAEGKMTNYTFYKYNSGYIHHVLVDGLEYDTKYYYKTGDGDSAREFWFQTPPMIGPDVPYKFGIIGDLGQTYNSLSTLEHYMESGAQSVLFVGDLSYADRYKYNDVGIRWDSWGRFVEKSTAYQPWIWSAGNHEIEYMPYMNEVTPFKSYLHRYPTPYLASKSSSPMWYAIRRASAHIIVLSSYSPFVKYTPQWKWLEEELNRVDRKKTPWLIVLVHVPIYNSNEAHFMEGESMRAVFEEWFIHHKVDVIFAGHVHAYERSYRISNIRYNVSSGERFPVPDESAPVYITVGDGGNQEGLAGK…	99.37	0	gi|357601492|gb|AET86956.1|	PAP26 [Gossypium hirsutum]	MT2654
6179	Cotton_D_gene_10006527	57105.6	0.055	3|2|3	16|4|16	1.65	0.009	0.001|0.013|0.001	Cotton_D_gene_10006527	MNCSPKFPVKWVKFMVMILSIASTGIAAGRTDIPRLSPTRGIIMEDPDLLSSAAVSDDFQTFYYPQTLDHFNYQPQSNATFQQRYVMNFKYWGGANNSAPILAYLGAESHLNVSLTSIGFLNDNAVSFNALLVYIEHRYYGISIPFGSREEAFKNASTLGYFNSAQAIADYAEIIMHIKNELRAFYSPVIVVGGSYGGMLASWLRLKYPHVALGALASSAPILYFDKITPSGAYYSVVTKDFREASESCYQTIRNSWSVIDKIASQPNGLSNLSTIFKTCKPLNKSSELKIALKNMYASAAQYDRPPRYPVTVICGGIDGANEKQDILSKIFAGVVAYRGNCSCYINPSTNDSSCPPTNDSEIVGWRWQTCSEMVIPIGIGNGTMFQPAPFNLTSFVQH…	68.47	0	gi|225436405|ref|XP_002271797.1|	PREDICTED: lysosomal Pro-X carboxypeptidase [Vitis vinifera]	-
6181	CotAD_41194	35616.8	0.456	4|4|5	39|33|44	1.24	0.001	0.001|0.004|0.001	CotAD_41194	MFRSVARSAAGKSLLRRGYATAVPERKVAVLGAAGGIGQPLALLMKLNPLVSQLALYDIANTPGVAADVSHINSRSEVAGYVGEEQLGKALEGCDVVIIPAGVPRKPGMTRDDLFNINAGIVKGLCSAIAKYCPNALVNMISNPVNSTVPIAAEVFKKAGTYDERKLFGVTTLDVVRAKTFYAGKAKVNVADVNVPVVGGHAGITILPLFSQATPKANLPEEDIKALTKRTQDGGTEVVEAKAGKGSATLSMAYAGAIFADACLKGLNGVPDVVECSFVQSTVTELPFFASKVRLGKNGVEEVLGLGPLSEYEKEGLESLKPELKSSIEKGIKFANQN	89.74	0	gi|255566555|ref|XP_002524262.1|	malate dehydrogenase, putative [Ricinus communis]	SMc02479
6190	Cotton_D_gene_10006532	56919.9	0.04	2|1|1	3|10|8	1.46	0.025	0.540|0.002|0.018	Cotton_D_gene_10006532	MNYSPKFPVQWLPFMVMVLSILLTGISAGRTDIPRLSPTRGVIIEHPDFLSSATVSDLRTFYYPQTLDHFNYQPQSYATFQQRYVMNFKYWGGAKKSAPVLAYLGAEGPLDGDLTVIGFLNDNAVRFNALLVYIEHRYYGKSIPFGSREEAFKNASTLGYFNSAQAIADYAEIIMHIKNKLRAFYSPVIVVGGSYGGMLASWLRLKYPHVALGALASSAPILYFDKITPRGAYFSVVTKDFREASETCYQTIRNSWSVIDRIASQPNGLSTLSMIFKTCKPLKSSSELKNELENMYAVAAQYDRPPRYPVTVVCGGIDGANEKQDILDKIFAGVVAYKGNRSCYINPPTNKSETDVGWRWQTCSEMVIPIGIGKRTMFQPEPFNLNYFLQECKSLYGVP…	67.95	0	gi|255565523|ref|XP_002523752.1|	Lysosomal Pro-X carboxypeptidase, putative [Ricinus communis]	-
6198	CotAD_21749	49326.9	0.32	1|1|1	4|9|6	1.3	0.006	0.211|0.002|0.154	CotAD_21749	MFLHFGVNTFTDSERGTGKENPSIFNPVGLDTKQWVTVAAEAGISLMILTAKHHDGFCLWPSKYTHHSVISSPWRNGHGDVVQEFIDSVKTHGGGGIDAGLYLSPWDRHDKRYGHDLQYNEYYLAQLQELLTKYGSVKEIWFDGFKGKDAKNMSYYFSDWFAMVRELQSSINIFSDAGPDVRWVGNEKGFAGNTSWSTINSTLLSIGNASIGDYLNTGDPKGTNWLPAECDVSIREGWFWHKSQSPKKLSQLLDIYYNSVGRNCVMLLNVPPNSTGLISESDIHRLKEFRAAIDTIFSTNLAEKCIVKVSSQRGGKGGGFGPENVLDNDHVWTYWSPKENKNEHWIEIKVPNAEEGMKFNVVRIQEPIGLGQRIIKHEIYVDGKKVVQGTTVGYKRLHR…	76.66	0	gi|470145022|ref|XP_004308143.1|	PREDICTED: alpha-L-fucosidase 1-like [Fragaria vesca subsp. vesca]	TM0306
6208	Cotton_D_gene_10018546	12232.2	0.205	1|1|1	12|6|5	1.97	0.019	0.004|0.079|0.015	Cotton_D_gene_10018546	MASFEQAPPGNAKAGEKIFKTKCAQCHTVDKGAGHKQGPNLNGLFGRQSGTTAGYSYSAANKNMAVVWSENTLYDYLLNPKKYIPGTKMVFPGLKKPQDRADLIAYLKESTA	93.75	6e-77	gi|255542732|ref|XP_002512429.1|	Cytochrome c, putative [Ricinus communis]	SMa1487
6215	CotAD_70731	58033.9	0.263	2|2|2	12|15|6	1.83	0.008	0.001|0.002|0.019	CotAD_70731	MDKLVVILTFFLTHFFIFPLGNFVNGTTITSCTQTPYPDVCNFYMGNSLNVAANLDQTQFSFRDVAIQVTLSQAVQAHQLVSSMDSSSFDQRAKLAWNDCVELYEDTIHLLNLSKNTKNPIDSQTWLSAATANQQTCQNGFIDFNLASHLQTLPSMLGNFTKLISNSLAINKATTVTSSTSHSNFAKQVANRRLLSDGFPAWLSVADRKLLQTTGAPPKADIVVAQDGSGNFKTITEAVAAAGGGKRTVIYVKAGVYKENVDIKRAAKNIMLIGDGIDATIVTSSKNAQTTTTFRSATVGVSGDGFIARDMTFENTAGPQKHQAVALRSGSDFSVFYRCSFKGYQDTLYVYSQRQFYRDCDIYGTVDFIFGDAVAVFQSCNIYIRRPMSGQKNTVTAQG…	71.76	0	gi|255573722|ref|XP_002527782.1|	Pectinesterase-1 precursor, putative [Ricinus communis]	RSp0138
6216	CotAD_20275	35463.2	0.222	1|1|1	4|5|8	1.95	0.038	0.002|0.016|0.001	CotAD_20275	MDQIQHNFITVRGLKFHVADLGEGSNVVLFLHGFPEIWYSWRYQMVALANAGFRTLAPDYRGYGLSDIPPEPEKTTFADLVADLVAILDHLGINKVFVVAKDFGVRPAYLLTLLHPHRVSCVVTLGVPHVPLEPRKYRESLTEGFYISRWNEPGRAEADFGRFDAKTVVRNIYILFSRSEIPIADEKQEVMDMVDASVPLPPWFTEEDLATYGALYEKSGFKTALQVPYRSFDEDFGITDPIVKVPALLIMGCKDYVLKFPGMEEYIKFGKAKELVPDLDIIYLPEGTHFVQEQSPELVNELILDFLRSHM	73.63	9e-173	gi|462407526|gb|EMJ12860.1|	hypothetical protein PRUPE_ppa008997mg [Prunus persica]	RSc1396
6228	CotAD_21798	10676.5	0.082	1|1|1	1|2|1	2.95	1.738	0.047|0.009|0.360	CotAD_21798	MKKASYTAAFSAAAVVVLLLLAEAKVSMAVTCSPTQLSSCVSAITSSSPPSKLCCSKIKEQKPCLCQYLKNPNLKKFINTPNARKVASTCGTPFPKC	95.65	1e-30	gi|224135417|ref|XP_002322068.1|	predicted protein [Populus trichocarpa]	-
6229	CotAD_63112	31040.7	0.179	-|5|5	-|13|13	1.28	-	-|0.001|0.100	CotAD_63112	MASATQPSSSQAVSPEDVNKETNIFQLIQAHQEKAARLSPVEEIRTVLDQSTRGMLSTFSQKHEGYPSASMVDFACDANGSPILAVSRLAVHTKDLLANFKCSLLVARDPEDRTDLVITLHGDAIAVSEKDQAAIRTAYLAKHPNAFWVDFADFQFMRIEPKVVRYLSGVATALLGSGEFSREEYQDSKVDPIAQFSKPVASHMNKDHAEDTKVIVQFATSIPVDNAYMLDLDSLGFNVKAGYQGNTFKLRVPFPRRAEDRKDVKTLIVDMLQAARSQVN	82.14	3e-173	gi|224144803|ref|XP_002325420.1|	predicted protein [Populus trichocarpa]	mlr2805
6241	CotAD_41483	17344.9	0.342	1|1|1	2|7|2	1.4	0.143	0.087|0.011|0.993	CotAD_41483	MGVFTKEAEVSTPLPPAKAFKAFAVDIENLMPKVAPQTIKSAEVLEGNGGSGTIRKITFAEGHGLSHAKHKVDVLDKDNLVYAYTVMESDFFNKKIEKISYDIKFVAAADGGSTVKVNATFYTAGDTEVTPDLMAQIKEASEKRALVMKAIESYVLANPDA	75.47	3e-77	gi|354620275|gb|AER29901.1|	VdI2 [Gossypium barbadense]	-
6243	CotAD_51062	36382.8	0.179	3|1|2	9|1|10	1.28	0.001	0.015|0.003|0.011	CotAD_51062	MEFPFGHNHSHTHHHRNDDEENQERPPPPHLHHHEFTPPYPPPPSYQQPPGFDGPYPPPPPSSYLHQPGFDGPPPPSYFQQPGFPPPPPHQPPSYQYQQPPHVTHVHRQPEHSPSNYSPPPASVSNVSHESSQGRVDDHPSFRPHLPPEFYKKPTVKVYCKADPNFHLTIRDGKVILAPSDPSNEFQHWYKDEKFSTSVKDEVGFPSFSLVNKATGQAIKHSIGASYPVQLVPYKPDHLDESVLWSESKEVHDGYRAIRMINNIRLNVDAFHGDKKSGGIQNGTTIVLWQWNKGDNQIWKIVPYCKFGETKKQRQLKS	64.11	2e-92	gi|255568992|ref|XP_002525466.1|	conserved hypothetical protein [Ricinus communis]	-
6254	CotAD_03267	48349.9	0.178	5|-|-	12|-|-	1.26	-	0.001|-|-	CotAD_03267	MTVHSQIQDETGRSVKPSYFNSPPLDVSVAFPQATPASTFPPLASDYYQFNDLLSPEEQALRKKVRECMEKEVAPIMAEYWEKAEFPFQIVPKLGALRISGGTIKGYGCPGLSLTGSAIAMAEVARVDASCSTFILVHSSLAMLTIALCGSEEQKQKYLPSLAQLKTVACWALTEPDYGSDASSLKTTATKVEGGWILEGQKRWIGNSTFADVLVIFARNTTTNQINGYLVKKDSPGLTATKIPNKIGLRIVQNGDILLKKVFVLDEDRLPGVNSFQDTSKVLAVSRVMVAWQPIGISMGVYDMCARYLKERKQFGAPLAAFQINQQKLARMLGNIQAMTLVGWRLCKLYEEGKMTPGHASLGKSWITSMARETAALGRELLGGNGILADFLVAKAFCD…	85.88	0	gi|359481157|ref|XP_003632582.1|	PREDICTED: acyl-coenzyme A oxidase 4, peroxisomal-like isoform 2 [Vitis vinifera]	DR1544
6256	Cotton_D_gene_10004350	37361.8	0.219	4|1|4	12|8|10	2.58	0.108	0.002|0.002|0.003	Cotton_D_gene_10004350	MTNSNFVLLFIVGILATQAMSRTVYESAIAEHEQWMVKHGRNYKNKAEKDKRFKIFKENLEYIQNFNNAGNRTYKLSINKYSDLTHDEFVAARTGYINPGNTMTSMETSFRYAEFTDVPTSLDWKSKGAVTSVKDQGQCGCCWAFAAVAAMEGLNQITNGNLVSLSEQQVLDCSGSSNGCNGGNKIEAFKYVIQNNGLTKEDNYPYQAMQGTCDLQKQASQVAHISNYESVPTNSEQELLKAVSNQPVAVSIEGSGTDFRHYSSGIFNGYCGTNPDHAVTVVGFGTSDDGTDYWLVKNQWGEDWGENGYIRMQRNVADSQGLCGLAIRPAYPTA	53.92	9e-137	gi|255564908|ref|XP_002523447.1|	cysteine protease, putative [Ricinus communis]	CAP0004
6269	Cotton_D_gene_10008569	24742.4	0.119	2|2|2	7|3|3	1.5	0.056	0.206|0.018|0.025	Cotton_D_gene_10008569	MGVTPKIAPSMLSSDFANLASEAKRMLDFGADWLHMDIMDGHFVPNLTIGAPVIESLRKHTKAFLDCHLMVTNPIDYVEPLGKAGASGFTFHVEVSKENWQELIQKIKSKAMRPGVALKPGTLIEEVYPLVDSENPVEMVLVMTVEPGFGGQKFMPQMMDKVRVLRKKYPSLDIEVDGGLGPSTIEMAASAGANCIVAGSSIFGAAEPGTVISHMRNCVLENQEKC	86.16	9e-146	gi|388496054|gb|AFK36093.1|	unknown [Lotus japonicus]	alr0782
6273	CotAD_21820	56137.7	0.211	6|6|6	28|35|38	1.51	0.004	0.025|0.021|0.007	CotAD_21820	MAANGEREVQKNYWMEHSIDLTEDGTILDSKDADLDKEDRLEVLSLLPPYEEKSILELGAGIGRFTGELAQKADSVIALDFIEDVIKKNESINGHYKNIKFLCADATSPDLDISEGSMDLIFSNLLLMYLSDEEVENLAQRMMKWLKVGGHIFFREACFDQSGDCKQKHDPSHYREPSFYTQVFKECHATDDSGNSFKLSLVGYKCISAYVKHKKNQNQICWIWEKVSSDNDGGFQRFLDTVQYKANSILRYERTFGEGFVSTGGIETTKEFVAKLDLKPGQKVLDVGCGIGGGDFYMAKEFGVYVVGIDLSINMISFALERANGLDCSVEFEVADCTTKTYPDNSFDVIYSRDTILHIQDKPALFRYFYKWLKPGGKVLISDYCKSAGASSPEFAEYI…	81.2	0	gi|255582633|ref|XP_002532097.1|	phosphoethanolamine n-methyltransferase, putative [Ricinus communis]	Zcfa
6278	Cotton_D_gene_10017980	38574.6	0.24	2|1|1	4|6|1	1.46	0.02	0.016|0.005|0.709	Cotton_D_gene_10017980	MLEQSLKKIRPAVSVLRSYSSAAKQMTVREALNSALDEEMSADSKVFLMGEEVGEYQGAYKITKGLLDKYGPERVLDTPITEAGFTGIAVGAAYYGVKPVVEFMTFNFSMQAIDHIINSAAKTNYMSSGRISVPIVFRGPNGAAAGVGAQHSQCYAAWYASCPGLKVLAPYSSEDARGLLKAGIRDPDPVVFLENELLYGESFPVSDEVLDSSFCLPIGKAKIERKGKDVTIAAYSKMVGYALKAAETLEKDGIDAEVINLRSIRPLDRSTINASVRKTNRLVTVEEAFPQHGVGAEICASIVEESFAYLDAPVERIAGADVPMPYAANLERMAVPQVEDIVRAAKRTCYRSVS	89.8	0	gi|255543140|ref|XP_002512633.1|	pyruvate dehydrogenase, putative [Ricinus communis]	TVN0101
6280	Cotton_D_gene_10025399	50667.7	0.196	3|5|4	11|8|11	1.23	0.012	0.029|0.070|0.026	Cotton_D_gene_10025399	MEKACNSHYHNQSLLLLPLFLSLLVAGLAYPTQDEQSQIISRFQQYLQINTTQPSPDYQSSTQFLLSQANSLSLESQVIEFVKGKPVILLKWPGSDLSLPSILLNSHTDVVPFEPSKWTHPPLGAYIDEGGNIFGRGSQDMKSVGMQYLEAIRRLKLSGFQPKRSLYLSFVPDEEIGGYDGAKKLAYSDVFKDMNVEIVLDEGLPSTDENYRLFYAEMAPWWLVIKSNGAPGHGAKLYDNSAMENLLKSIESIRRFRASQFDLLKAGLKSKGDVISVNMVFLKAGTPSPTGFVMNLQPSEAEAGFDIRAPPTADIESLEKRIEEEWAPASRNMTFEFKQKVTPHDDLGRPLITATDDSNPWWTLIEEAINKANGKIGKPEILSGATDARYFRQLGLTAI…	76.85	0	gi|118486005|gb|ABK94846.1|	unknown [Populus trichocarpa]	TVN1079
6283	CotAD_21534	25955.3	0.277	2|2|3	15|25|25	1.41	0.011	0.001|0.001|0.001	CotAD_21534	MGDEDVVLLDFWPSPFGMRVRIALAEKEIKYEYKEEDLRNKSDLLLKMNPVHKKIPVLIYNGKPVCESLIQVQYIDEIWPHKSPLLPTDPYQRAIARFWGDFVDNKIYDLGRKLWTTKGEEQEAAKKEFIECLKLLEGELGNKAYFGGENLGYVDVVLVPFYSWFYAYEKCGNFSIETECPKLIAWAKRCMEKDTVSKSLPDQDKIYDFVLHLKKVFGIE	79.72	1e-123	gi|333690873|gb|AEF79856.1|	glutathione-S-transferase tau 1 [Hevea brasiliensis]	mll0559
6292	Cotton_D_gene_10037496	15942.5	0.092	-|1|1	-|1|3	2.68	-	-|0.319|0.001	Cotton_D_gene_10037496	MEKMRVCIVVLACVVVSAAAQSGTNVRASYHEYNPQNINWDLSAASVYCATWDANRPLEWRRRYGWTAFCAPGGPQGQAACGRCLRVTNTGTGNQATVRIVDQCQNNGLDLDVNVFRQLDSNGVGIANGYLTVNYEFVNCGD	76.23	1e-55	gi|100352|pir||S23800	pathogenesis-related protein 4B - common tobacco	-
6294	CotAD_25964	21444.1	0.313	1|1|1	10|7|6	1.41	0.005	0.038|0.003|0.006	CotAD_25964	MASTILRRATSSVIKSSLLTEASRRSYASVAVGTDILSAASQVSLQKARSWDEGVTSNFSTTSVNDIFKGKKVVIFGLPGAYTGVCSQQHVPSYKKNIDKFKAKGIDSVICVAVNDPYVMNAWADKLQAKDVIEFYGDFDGSFHQSLELGKDLSAALLGPRSERWSAYVVDGKVKVLNVEGAPSDFKVSGAEVILEQI	79.8	6e-113	gi|470121747|ref|XP_004296922.1|	PREDICTED: peroxiredoxin-2F, mitochondrial-like [Fragaria vesca subsp. vesca]	YLR109w
6313	CotAD_34655	21828.8	0.25	1|1|1	5|7|6	1.33	0.002	0.033|0.053|0.023	CotAD_34655	MASTDKTAVPLSSPKSEAPPPSAVAAAAKSPVNYSFVDVVLRVLLFAATLTSVVVMATSKETELVPVPGFPLVRIQLQAKFNHSPALVYFIAALSVTGFYSIITTLASLSIVLNPTYSKTFLLFFAFFDVIFVGIVASATGAAGAVGYIGLKGNTHVGWTKICNVYDKFCRYTASSLALSLFAAILLVLLSMISTFTLYKKIRD	60.82	1e-46	gi|238055376|sp|B9RT03.1|CSPL5_RICCO	RecName: Full=CASP-like protein RCOM_0679870	-
6351	CotAD_18417	24249.9	0.344	5|5|4	39|32|25	1.29	0	0.001|0.001|0.001	CotAD_18417	MAATSLTLSRFLSPAAAISLSSTTKLSSKSLPLKLSSVSPLPFNLHRRRVSKPISFSTKTTQISAAISVGDKLPDATLSYFDSDGELQTTTISSLTAGKKTVIFAVPGAFTPTCSQKHLPGFVEKSGELKAKGVNTIACVSVNDAFVMRAWKENLGIKDEVLLLSDGNGEFTKKIGCELDLTDKPVGLGVRSRRYALLAEDGVVKLLNLEEGGAFTFSGAEDILKVL	75.98	1e-110	gi|255575353|ref|XP_002528579.1|	peroxiredoxin, putative [Ricinus communis]	YLR109w
6357	CotAD_73286	34810.4	0.097	2|-|-	4|-|-	1.34	-	0.049|-|-	CotAD_73286	MAETLMHALQYNSYGGGAAALKHVEVPIPTPNKDEILLKLDAISLNPVDWKIQEGVLRPFLPRKFPCIPASDVAGEVVKIGPGVTNFKAGDKVVAMLHHFTGGGLAEYAVAKENLTVARPPEVSAAEGAGLPVAGLTAHQALSQAAGVKLDGSGQQVNLLITAASGGVGHYAVQLAKLGNTHVTATCGARNLDFVKSLGADEVLDYKTPDGAALKSPSGRKYDAVIHCAAGIPWSTFEPNLSSNGKVIDITPGPSAFLTFAMKKLTFSKKKLEPLFVSLKKENLNYLVNLVKDGKLKTVIDSKYPLSKAEEAWAKSIDGHATGKIIVEP	81.16	0	gi|462397211|gb|EMJ03010.1|	hypothetical protein PRUPE_ppa008401mg [Prunus persica]	YPO1653
6364	CotAD_10550	60926.3	0.356	3|11|12	12|50|64	1.55	0.017	0.003|0.001|0.001	CotAD_10550	MGRFALLLLLAFASFQALCFAADDDTAFYDSFDEPFDGRWIVSDKDDYKGVWKHSKSEGHDDYGLLVSEKARKYAIVNELNEPVSLKDGSTVLQFETRFQNGLECGGAYLKYLRPQEAGWKAKLFDNESPYSIMFGPDKCGATNKVHFILKHKNPKSGEYVEHHLKYPPSVPSDKLTHVYTAILKPDNEVRILIDGEEKKKANFLSADDFEPPLIPAKTIPDPDDKKPEDWDERAKIPDPNAVKPDDWDEDAPMEIEDEEAVKPEGWLDDEPEEIDDPEATKPEDWDDEEDGEWEAPKIDNPKCETAPGCGEWKRPMKMNPAYKGKWSAPLIDNPNYKGIWKPQEIPNPDYFELDKPDFEPIAAVGIEIWTMQDGILFDNILIAKNDKVAESYRETTWK…	85.03	0	gi|356508884|ref|XP_003523183.1|	PREDICTED: calnexin homolog [Glycine max]	-
6367	CotAD_56230	52334.7	0.257	5|2|1	17|5|2	1.18	0.016	0.339|0.001|0.288	CotAD_56230	MAMYIVSRRLSAGSTTSQLVTSLRYATCWRSFFTSFREERDTFGPINVPSDKLWGAQTQRSLQNFEIGGERERMPEPIIRAFGVLKKCAAKVNMEYGLDPTIGKAIMQAAEEVAEGKLNDHFPLVVWQTGSGTQSNMNANEVIANRAAEILGHQRGEKFVHPNDHVNRSQSSNDTFPTLSTVMHIAAAMEINSRLIPKLKILHSTLHSKSIEFKDIVKIGRTHTQDATPLTLGQEFSGYTTQLAQGGTAVGTGLNTKKGFDAKIAAAVADETNLPFVTAENKFEALAAHDAFVETSGALNTVATSLMKVANDIRLLGSGPRCGLGELILPENEPGSSIMPGKVNPTQCEAITMVCAQVMGNHVAITVGGSNGHFELNVFKPMIANALLHSLRLLGDASA…	87.98	0	gi|462396383|gb|EMJ02182.1|	hypothetical protein PRUPE_ppa004758mg [Prunus persica]	Cj1364c
6374	Cotton_D_gene_10017640	35911.5	0.236	1|-|-	7|-|-	2.98	-	0.001|-|-	Cotton_D_gene_10017640	MAATFFRRLSKATPATFNNAFRGQPKSGFAGFRFATIATVAGGISTYYCFSDSNLVHLDQVNEETGRKVALKSDKWLEFKLQDTARVSHNTHLFRFSFDPSAKLGLDVASCILTRAPLGQDAEGKTKYVIRPYTPISDPDAKGYFDLLIKVYPEGKMSQHFASLKPGDVVEVKGPIEKLRYSPNMKKHIGMIAGGTGITPMLQVIEAILKNPDDKTQVSLLYANVSPDDILLKQKLDILAASHPNLKVYYTVDNPTKTWKGGAGFISKDMVTKGLPGPAEDTLILVCGPPGMMEHISGGKAKDYSQGELTGILKELGYTEQMVYKF	81.29	0	gi|225445442|ref|XP_002285073.1|	PREDICTED: NADH-cytochrome b5 reductase-like protein [Vitis vinifera]	SMa1735
[truncated: 230 more rows]

## Sheet: P48E P0C down
P48E-VS-P0C_Down 796 (44%) proteins were downregulated
No.	Protein_ID	Mass	Protein Coverage	Uniq_Pep_Num	Uniq_Spec_Num	Mean_Ratio_P48E_113/P0C_121	SD_P48E_113/P0C_121	Qvalue_P48E_113/P0C_121	Protein_ID	Protein_Seqence	NCBInr Identity	NCBInr E-value	NCBInr Accession	NCBInr Description	Protein_or_Domain
[truncated: 796 more rows]

## Sheet:  P48E P48C up
P48E-VS-P48C_Up, 775 (62%) proteins were upregulated
[truncated: 776 more rows]

## Sheet: P48E P48C Down
P48E-VS-P48C_Down, 477 (38%) proteins were downregulated
[truncated: 478 more rows]

## Sheet: P48C P0C Up
P48C-VS-P0C_Up, 485 (48%) proteins that were upregulated
[truncated: 486 more rows]

[truncated: 1 more sheets: P48C P0C Down]
