# Supplementary material for: Integrative Proteomic and Metabolomic Analysis Reveals the Cotton Plant Defense Mechanisms Induced by Insect (<em>Adelphocoris suturalis</em> Jakovlev) Feeding
Source: Preprints.org preprint supplement (doi:10.20944/preprints201809.0058.v1), 2018-09-04
Supplement: Supplementary file 5 [file Table S3.xlsx]

## Sheet: 工作表1
Supplementary Table S3. Pathway enrichment analysis of DEPs
1. P48C-VS-P0C							P48E-VS-P48C						P48E-VS-P0C
#	Pathway	DEPs with pathway annotation (858)	Qvalue	Pathway ID		#	Pathway	DEPs with pathway annotation (1026)	Qvalue	Pathway ID			Pathway	DEPs with pathway annotation (1510)	Qvalue	Pathway ID
1	Alanine, aspartate and glutamate metabolism	15 (1.75%)	0.0258	ko00250		1	Alanine, aspartate and glutamate metabolism	20 (1.95%)	0.0027	ko00250		1	Alanine, aspartate and glutamate metabolism	23 (1.52%)	0.0255	ko00250
2	Biosynthesis of secondary metabolites	189 (22.03%)	0.0113	ko01110		2	alpha-Linolenic acid metabolism	19 (1.85%)	0.0001	ko00592		2	alpha-Linolenic acid metabolism	19 (1.26%)	0.012	ko00592
3	Calcium signaling pathway	12 (1.4%)	0.005	ko04020		3	Amino sugar and nucleotide sugar metabolism	42 (4.09%)	0.0007	ko00520		3	Amino sugar and nucleotide sugar metabolism	53 (3.51%)	0.0046	ko00520
4	Caprolactam degradation	2 (0.23%)	0.0164	ko00930		4	Ascorbate and aldarate metabolism	23 (2.24%)	0.0114	ko00053		4	Arginine biosynthesis	17 (1.13%)	0.0285	ko00220
5	Carbon fixation in photosynthetic organisms	49 (5.71%)	3.2e-13	ko00710		5	beta-Alanine metabolism	13 (1.27%)	0.021	ko00410		5	Biosynthesis of amino acids	97 (6.42%)	0.0011	ko01230
6	Carbon metabolism	78 (9.09%)	7.11e-05	ko01200		6	Biosynthesis of amino acids	69 (6.73%)	0.0023	ko01230		6	Biosynthesis of antibiotics	165 (10.93%)	2.87e-05	ko01130
7	cGMP-PKG signaling pathway	12 (1.4%)	0.0182	ko04022		7	Biosynthesis of secondary metabolites	240 (23.39%)	0.0001	ko01110		7	Biosynthesis of secondary metabolites	350 (23.18%)	3.47e-06	ko01110
8	Gap junction	11 (1.28%)	0.0051	ko04540		8	Biosynthesis of unsaturated fatty acids	11 (1.07%)	0.0018	ko01040		8	Biosynthesis of unsaturated fatty acids	13 (0.86%)	0.0044	ko01040
9	Glyoxylate and dicarboxylate metabolism	24 (2.8%)	0.0162	ko00630		9	Carbon fixation in photosynthetic organisms	45 (4.39%)	3.03e-08	ko00710		9	Calcium signaling pathway	16 (1.06%)	0.0162	ko04020
10	Isoquinoline alkaloid biosynthesis	10 (1.17%)	0.0101	ko00950		10	Carbon metabolism	103 (10.04%)	2.11e-08	ko01200		10	Carbon fixation in photosynthetic organisms	60 (3.97%)	1.61e-09	ko00710
11	Linoleic acid metabolism	5 (0.58%)	0.0339	ko00591		11	Citrate cycle (TCA cycle)	19 (1.85%)	0.0428	ko00020		11	Carbon metabolism	141 (9.34%)	2.23e-09	ko01200
12	Metabolic pathways	326 (38%)	0.0001	ko01100		12	Cysteine and methionine metabolism	26 (2.53%)	0.0288	ko00270		12	Citrate cycle (TCA cycle)	30 (1.99%)	0.0032	ko00020
13	Methane metabolism	22 (2.56%)	0.0008	ko00680		13	D-Glutamine and D-glutamate metabolism	4 (0.39%)	0.0024	ko00471		13	D-Glutamine and D-glutamate metabolism	4 (0.26%)	0.0105	ko00471
14	Microbial metabolism in diverse environments	102 (11.89%)	1.85e-05	ko01120		14	Fatty acid degradation	15 (1.46%)	0.0291	ko00071		14	Fructose and mannose metabolism	30 (1.99%)	0.0026	ko00051
15	Nitrogen metabolism	12 (1.4%)	0.005	ko00910		15	Fructose and mannose metabolism	26 (2.53%)	0.0001	ko00051		15	Glycolysis / Gluconeogenesis	55 (3.64%)	0.0012	ko00010
16	Novobiocin biosynthesis	3 (0.35%)	0.031	ko00401		16	Glutathione metabolism	23 (2.24%)	0.0236	ko00480		16	Glycosaminoglycan degradation	13 (0.86%)	0.0216	ko00531
17	Pentose phosphate pathway	25 (2.91%)	3.68e-05	ko00030		17	Glyoxylate and dicarboxylate metabolism	31 (3.02%)	0.0018	ko00630		17	Lysine degradation	12 (0.79%)	0.0065	ko00310
18	Phenylpropanoid biosynthesis	40 (4.66%)	0.0041	ko00940		18	Isoquinoline alkaloid biosynthesis	10 (0.97%)	0.0327	ko00950		18	Metabolic pathways	600 (39.74%)	4.38e-12	ko01100
19	Photosynthesis	31 (3.61%)	3.23e-06	ko00195		19	Lysine degradation	8 (0.78%)	0.0354	ko00310		19	Methane metabolism	30 (1.99%)	0.0048	ko00680
20	Photosynthesis - antenna proteins	9 (1.05%)	0.0048	ko00196		20	Metabolic pathways	418 (40.74%)	5.72e-10	ko01100		20	Microbial metabolism in diverse environments	169 (11.19%)	6.45e-07	ko01120
21	Polyketide sugar unit biosynthesis	2 (0.23%)	0.0164	ko00523		21	Methane metabolism	25 (2.44%)	0.0007	ko00680		21	Nitrogen metabolism	20 (1.32%)	0.0003	ko00910
22	Ribosome	82 (9.56%)	3.77e-10	ko03010		22	Microbial metabolism in diverse environments	117 (11.4%)	2.8e-05	ko01120		22	Other glycan degradation	38 (2.52%)	1.58e-05	ko00511
23	Terpenoid backbone biosynthesis	16 (1.86%)	0.012	ko00900		23	Nitrogen metabolism	13 (1.27%)	0.0079	ko00910		23	Pentose phosphate pathway	37 (2.45%)	1.2e-05	ko00030
24	Tropane, piperidine and pyridine alkaloid biosynthesis	10 (1.17%)	0.0152	ko00960		24	Other glycan degradation	27 (2.63%)	0.0002	ko00511		24	Phagosome	34 (2.25%)	0.0046	ko04145
25	Tyrosine metabolism	15 (1.75%)	0.0228	ko00350		25	Pentose phosphate pathway	22 (2.14%)	0.0076	ko00030		25	Phenylpropanoid biosynthesis	59 (3.91%)	0.0223	ko00940
						26	Phenylpropanoid biosynthesis	45 (4.39%)	0.0071	ko00940		26	Photosynthesis	55 (3.64%)	1.07e-11	ko00195
						27	Photosynthesis	38 (3.7%)	7.14e-08	ko00195		27	Photosynthesis - antenna proteins	13 (0.86%)	0.0029	ko00196
						28	Protein digestion and absorption	5 (0.49%)	0.0013	ko04974		28	Porphyrin and chlorophyll metabolism	34 (2.25%)	0.0167	ko00860
						29	Selenocompound metabolism	12 (1.17%)	0.0009	ko00450		29	Protein digestion and absorption	6 (0.4%)	0.0007	ko04974
						30	Valine, leucine and isoleucine degradation	17 (1.66%)	0.0364	ko00280		30	Ribosome	103 (6.82%)	6.8e-05	ko03010
												31	Selenocompound metabolism	15 (0.99%)	0.0009	ko00450
												32	Starch and sucrose metabolism	78 (5.17%)	0.0336	ko00500
												33	Styrene degradation	4 (0.26%)	0.0498	ko00643
												34	Terpenoid backbone biosynthesis	28 (1.85%)	0.0006	ko00900
Ps:
We first compared the two control groups, P48C and P0C , and then removed the pathway (colorful) changes arising from plant growth.
These changes were considered as background noise. Then, we compared the pathway experimental P48E with the control P48C.
