# Supplementary material for: Integrative Proteomic and Metabolomic Analysis Reveals the Cotton Plant Defense Mechanisms Induced by Insect (<em>Adelphocoris suturalis</em> Jakovlev) Feeding
Source: Preprints.org preprint supplement (doi:10.20944/preprints201809.0058.v1), 2018-09-04
Supplement: Supplementary file 6 [file Table S4.xlsx]

## Sheet: pos  
50 changed metabolites in positive ion mode. the dada highlighted in red represent upregulated metabolites, and the dada highlighted in blue represent downregulated
Name	inche key	mz	rt	vip	fold_change(group1/group2)	qvalue	Compound_ID	FORMULA	Score	Fragmentation_score	Mass_error	Isotope_score	pubchem_id	kegg_id	cas_id	biocyc_id	kindom	super_class	class	sub_class	molecular_framework	origin	pathway
beta-Alanyl-L-lysine	PLDCWKCPEXNWJH-ZETCQYMHSA-N	435.297	3.08222	5.39528	4.42298	0.0359754	C05341	C9H19N3O3	37.9	3.67	9.31498	96.1649	440638	C05341	null	null	Organic compounds	Organic acids and derivatives	Carboxylic acids and derivatives	Amino acids, peptides, and analogues	Aliphatic acyclic compounds	null	map00410 beta-Alanine metabolism
GDP-4-dehydro-6-deoxy-D-mannose	PNHLMHWWFOPQLK-BKUUWRAGSA-N	605.103	6.23313	1.672	1.90905	0.024128	C01222	C16H23N5O15P2	37.4	0.0203	4.79018	92.7055	439446	C01222	18186-48-6	GDP-4-DEHYDRO-6-DEOXY-D-MANNOSE	Organic compounds	Nucleosides, nucleotides, and analogues	Purine nucleotides	Purine nucleotide sugars	Aromatic heteropolycyclic compounds	Endogenous	map00051 Fructose and mannose metabolism
2-Hydroxy-6-oxonona-2,4-diene-1,9-dioate	RFENOVFRMPRRJI-YDCWOTKKSA-N	228.058	0.343233	1.49541	1.75817	0.0263896	C04479	C9H10O6	37.5	4.46	-7.63579	91.6304	NULL	C04479	PubChem: 7099	NULL	NULL	NULL	NULL	NULL	NULL	NULL	map00360 Phenylalanine metabolism
Cys-Gly	ZUKPVRWZDMRIEO-VKHMYHEASA-N	192.054	0.327767	1.50931	1.71202	0.0229927	C01419	C5H10N2O3S	37.4	0.0319	6.25978	94.2856	439498	C01419	19246-18-5	GLUTATHIONE	Organic compounds	Organic acids and derivatives	Carboxylic acids and derivatives	Amino acids, peptides, and analogues	Aliphatic acyclic compounds	Endogenous	map00480 Glutathione metabolism
S-Methyl-5-thio-D-ribose 1-phosphate	JTFITTQBRJDSTL-KVTDHHQDSA-N	521.033	7.01013	1.26185	1.53901	0.0405599	C04188	C6H13O7PS	37.2	2.3	2.97196	87.0942	53477720	C04188	72843-83-5	CPD-444	Organic compounds	Organophosphorus compounds	Organic phosphoric acids and derivatives	Phosphate esters	Aliphatic heteromonocyclic compounds	Endogenous	map00270 Cysteine and methionine metabolism
Tryptamine;	APJYDQYYACXCRM-UHFFFAOYSA-N	321.21	8.43985	1.38054	1.44462	0.0179851	C00398	C10H12N2	41.6	26.4	7.20155	89.869	1150	C00398	61-54-1	TRYPTAMINE	Organic compounds	Organoheterocyclic compounds	Indoles and derivatives	Tryptamines and derivatives	Aromatic heteropolycyclic compounds	Endogenous	map00380 Tryptophan metabolism
5-(2'-Carboxyethyl)-4,6-dihydroxypicolinate;	MEACACCQPBWCOO-UHFFFAOYSA-N	291.057	7.93337	1.30507	1.4135	0.0441959	C05655	C9H9NO6	39.6	13.3	-6.53692	92.2384	null	C05655	null	null	Organic compounds	Organoheterocyclic compounds	Pyridines and derivatives	Hydropyridines	Aliphatic heteromonocyclic compounds	Endogenous	map00380 Tryptophan metabolism
2-Aminophenol;	CDAWCLOXVUBKRW-UHFFFAOYSA-N	282.12	0.35915	1.12883	1.38173	0.0451735	C01987	C6H7NO	36.9	0.297	-7.75736	93.1218	NULL	C01987	CAS: 95-55-6	NULL	NULL	NULL	NULL	NULL	NULL	NULL	map00380 Tryptophan metabolism
N-Acetylserotonin;	MVAWJSIDNICKHF-UHFFFAOYSA-N	282.12	0.35915	1.12883	1.38173	0.0451735	C00978	C12H14N2O2	35.6	0	-7.75736	86.7613	903	C00978	1210-83-9	N-ACETYL-SEROTONIN	Organic compounds	Organoheterocyclic compounds	Indoles and derivatives	Tryptamines and derivatives	Aromatic heteropolycyclic compounds	Drug metabolite	map00380 Tryptophan metabolism
Isoprene	RRHGJUQNOFWUDK-UHFFFAOYSA-N	137.133	8.73203	1.06541	1.36526	0.0312233	C16521	C5H8	41.6	15.2	1.63229	94.6774	NULL	C16521	CAS: 78-79-5	NULL	NULL	NULL	NULL	NULL	NULL	NULL	map00900 Terpenoid backbone biosynthesis
Dodecanoic acid	POULHZVOKOAJMA-UHFFFAOYSA-N	218.212	4.67342	1.19737	1.33864	0.0453221	C02679	C12H24O2	39.6	0.287	0.72067	98.5509	3893	C02679	143-07-7	null	Organic compounds	Lipids and lipid-like molecules	Fatty Acyls	Fatty acids and conjugates	Aliphatic acyclic compounds	Endogenous	map00061 Fatty acid biosynthesis
Isophenoxazine (2-Aminophenoxazin-3-one)	RDJXPXHQENRCNG-UHFFFAOYSA-N	447.108	6.12618	1.05284	1.32631	0.0352816	C02161	C12H8N2O2	29.3	0	4.41336	51.3851	72725	C02161	1916-59-2	null	Organic compounds	Organoheterocyclic compounds	Benzoxazines	Phenoxazines	Aromatic heteropolycyclic compounds	Endogenous	map00380 Tryptophan metabolism
L-2-Aminoadipate adenylate	POJWEBKSMOTPNS-SBZSCLMQSA-N	523.156	8.31128	1.06938	1.29528	0.0257396	C05560	C16H23N6O10P	40.7	10.3	1.64497	94.9544	53477910	C05560	null	null	Organic compounds	Nucleosides, nucleotides, and analogues	Purine nucleotides	Purine ribonucleotides	Aromatic heteropolycyclic compounds	Endogenous	map00300 Lysine biosynthesis
CDP-ascarylose	JHEDABDMLBOYRG-FQTMVLHBSA-N	551.118	8.31128	1.03869	1.28271	0.0336471	C17327	C15H25N3O14P2	37.2	2.69	6.03429	90.2969	NULL	C17327	PubChem: 96023691	NULL	NULL	NULL	NULL	NULL	NULL	NULL	map00520 Amino sugar and nucleotide sugar metabolism
Linoleate	OYHQOLUKZRVURQ-HZJYTTRNSA-N	313.273	8.31128	1.03471	1.26605	0.0310123	C01595	C18H32O2	39.4	1.07	-2.20083	98.7766	5280450	C01595	60-33-3	null	Organic compounds	Lipids and lipid-like molecules	Lineolic acids and derivatives	null	Aliphatic acyclic compounds	Drug	map00591 Linoleic acid metabolism
5'-Methylthioadenosine	WUUGFSXJNOTRMR-IOSLPCCCSA-N	339.123	3.873	1.05312	0.767286	0.0244623	C00170	C11H15N5O3S	35.6	8.22	-0.330218	69.9646	439176	C00170	2457-80-9	5-METHYLTHIOADENOSINE	Organic compounds	Organooxygen compounds	Carbohydrates and carbohydrate conjugates	Glycosyl compounds	Aromatic heteropolycyclic compounds	Endogenous	map00270 Cysteine and methionine metabolism
3-Indoleacetonitrile;	DMCPFOBLJMLSNX-UHFFFAOYSA-N	313.145	3.91587	1.12507	0.759366	0.0174316	C02938	C10H8N2	35.6	3.36	0.26145	75.157	351795	C02938	771-51-7	null	Organic compounds	Organoheterocyclic compounds	Indoles and derivatives	Indoles	Aromatic heteropolycyclic compounds	Endogenous	map00380 Tryptophan metabolism
Abscisic acid glucose ester	HLVPIMVSSMJFPS-VTEUUMMASA-N	471.144	4.98135	1.1165	0.758205	0.0162364	C15970	C21H30O9	36.4	15.1	-6.74127	74.6087	NULL	C15970	PubChem: 47205283	NULL	NULL	NULL	NULL	NULL	NULL	NULL	map00906 Carotenoid biosynthesis
Gibberellin A5	ZOWHLBOPCIHIHW-KQBHUUJHSA-N	166.082	5.77442	1.07615	0.753955	0.0269164	C11871	C19H22O5	35.2	1.77	6.22616	81.4052	NULL	C11871	CAS: 561-56-8	NULL	NULL	NULL	NULL	NULL	NULL	NULL	map00904 Diterpenoid biosynthesis
N-Succinyl-L-glutamate	JCNBNOQGFSXOML-YFKPBYRVSA-N	265.104	4.3803	1.14194	0.723156	0.0272998	C05931	C9H13NO7	32.4	3.31	3.39837	62.5019	NULL	C05931	PubChem: 8219	NULL	NULL	NULL	NULL	NULL	NULL	NULL	map00330 Arginine and proline metabolism
5-Hydroxy-L-tryptophan;	LDCYZAJDBXYCGN-VIFPVBQESA-N	253.119	3.05363	1.28106	0.714373	0.0125142	C00643	C11H12N2O3	39.4	11.7	3.07733	89.2071	439280	C00643	4350-09-08	null	Organic compounds	Organoheterocyclic compounds	Indoles and derivatives	Tryptamines and derivatives	Aromatic heteropolycyclic compounds	Drug	map00380 Tryptophan metabolism
Indole-3-acetaldehyde;	WHOOUMGHGSPMGR-UHFFFAOYSA-N	341.127	7.06795	1.24063	0.712763	0.0210373	C00637	C10H9NO	35.5	0	4.12777	82.1853	800	C00637	2591-98-2	INDOLE_ACETALDEHYDE	Organic compounds	Organoheterocyclic compounds	Indoles and derivatives	Indoles	Aromatic heteropolycyclic compounds	Endogenous	map00380 Tryptophan metabolism
L-Hydroxylysine	YSMODUONRAFBET-UHNVWZDZSA-N	363.164	3.38867	1.2817	0.681754	0.0189353	C16741	C6H14N2O3	33.1	11.8	-0.0642402	54.0069	3032849	C16741	1190-94-9	CPD-7689	Organic compounds	Lipids and lipid-like molecules	Fatty Acyls	Fatty acids and conjugates	Aliphatic acyclic compounds	Endogenous	map00310 Lysine degradation
(-)-Jasmonic acid	ZNJFBWYDHIGLCU-HWKXXFMVSA-N	421.258	6.77238	1.26559	0.676727	0.0359754	C08491	C12H18O3	41.4	27.6	-2.29084	82.119	5281166	C08491	59366-47-1	null	Organic compounds	Lipids and lipid-like molecules	Lineolic acids and derivatives	Jasmonic acids	Aliphatic homomonocyclic compounds	Endogenous	map00592 alpha-Linolenic acid metabolism
Magnesium protoporphyrin	REJJDEGSUOCEEW-UHFFFAOYSA-J	617.258	5.13978	1.20523	0.671378	0.0441959	C03516	C34H32MgN4O4	34.2	3.14	-4.53894	73.2638	NULL	C03516	PubChem: 6325	NULL	NULL	NULL	NULL	NULL	NULL	NULL	map00860 Porphyrin and chlorophyll metabolism
Cinnavalininate;	FSBKJYLVDRVPTK-UHFFFAOYSA-N	345.01	0.7149	1.39877	0.660458	0.0125142	C05640	C14H8N2O6	36.1	0	2.53283	83.5444	114918	C05640	null	null	Organic compounds	Organoheterocyclic compounds	Benzoxazines	Phenoxazines	Aromatic heteropolycyclic compounds	Endogenous	map00380 Tryptophan metabolism
Feruloylputrescine	SFUVCMKSYKHYLD-FNORWQNLSA-N	551.283	6.53552	1.25868	0.653051	0.0354937	C10497	C14H20N2O3	38.4	4.3	-2.05518	90.0012	null	C10497	501-13-3	null	Organic compounds	Phenylpropanoids and polyketides	Cinnamic acids and derivatives	Hydroxycinnamic acids and derivatives	Aromatic homomonocyclic compounds	Food	map00330 Arginine and proline metabolism
5-Hydroxykynurenamine	JANBBPTXDKFOQR-UHFFFAOYSA-N	361.185	3.68083	1.48036	0.640114	0.0101124	C05638	C9H12N2O2	35	5.2	-6.67421	77.2698	164719	C05638	708-23-6	null	Organic compounds	Benzenoids	Benzene and substituted derivatives	Phenylpropylamines	Aromatic homomonocyclic compounds	Endogenous	map00380 Tryptophan metabolism
3-Hydroxykynurenamine	ODOPEICAGBYCFH-UHFFFAOYSA-N	361.185	3.68083	1.48036	0.640114	0.0101124	C05636	C9H12N2O2	35	5.2	-6.67421	77.2698	NULL	C05636	PubChem: 7947	NULL	NULL	NULL	NULL	NULL	NULL	NULL	map00380 Tryptophan metabolism
(4R)-7-Hydroxy-4-isopropenyl-7-methyl-2-oxo-oxepanone	ZZVPZXLETLTSEB-HNHGDDPOSA-N	391.213	3.08222	1.2947	0.637864	0.0310123	C19079	C10H16O3	39.1	26	9.26084	79.872	NULL	C19079	PubChem: 124489751	NULL	NULL	NULL	NULL	NULL	NULL	NULL	map00903 Limonene and pinene degradation
L-Ascorbate 6-phosphate	KIENGQUGHPTFGC-SZSCBOSDSA-K	300.968	3.53797	1.2735	0.62579	0.041591	C16186	C6H9O9P	39.5	13.3	-7.07229	92.3149	NULL	C16186	PubChem: 47205494	NULL	NULL	NULL	NULL	NULL	NULL	NULL	map00053 Ascorbate and aldarate metabolism
6-Hydroxymelatonin	OMYMRCXOJJZYKE-UHFFFAOYSA-N	497.236	4.22262	1.47528	0.620616	0.0183277	C05643	C13H16N2O3	31	0.421	-7.19031	62.6109	1864	C05643	2208-41-5	NULL	Organic compounds	Organoheterocyclic compounds	Indoles and derivatives	Tryptamines and derivatives	Aromatic heteropolycyclic compounds	Drug metabolite	map00380 Tryptophan metabolism
CTP	PCDQPRRSZKQHHS-XVFCMESISA-N	501.015	0.379867	1.47522	0.579423	0.0353745	C00063	C9H16N3O14P3	36.6	6.94	-7.52828	84.2691	6176	C00063	65-47-4	CTP	Organic compounds	Nucleosides, nucleotides, and analogues	Pyrimidine nucleotides	Pyrimidine ribonucleotides	Aromatic heteromonocyclic compounds	Endogenous	map00240 Pyrimidine metabolism
2,3-Dihydroxyindole;	PGNRLPTYNKQQDY-UHFFFAOYSA-N	337.092	3.973	1.7077	0.545271	0.0108019	C02775	C8H7NO2	36	0	3.88256	84.5558	NULL	C02775	PubChem: 5727	NULL	NULL	NULL	NULL	NULL	NULL	NULL	map00380 Tryptophan metabolism
2-Formylaminobenzaldehyde	PVIMSPYDDGDCTG-UHFFFAOYSA-N	337.092	3.973	1.7077	0.545271	0.0108019	C03574	C8H7NO2	36	0	3.88256	84.5558	NULL	C03574	PubChem: 6366	NULL	NULL	NULL	NULL	NULL	NULL	NULL	map00380 Tryptophan metabolism
Indole-3-acetaldehyde oxime;（Indole-3-acetaldoxime）	ZLIGRGHTISHYNH-UHFFFAOYSA-N	371.145	4.80258	1.75059	0.53372	0.00920136	C02937	C10H10N2O	35.6	5.48	-7.67895	81.2884	NULL	C02937	PubChem: 5856	NULL	NULL	NULL	NULL	NULL	NULL	NULL	map00380 Tryptophan metabolism
Stearidonic acid	JIWBIWFOSCKQMA-LTKCOYKYSA-N	309.241	7.71253	1.65183	0.51817	0.0473534	C16300	C18H28O2	43.5	28.6	-3.97951	93.6278	5312508	C16300	20290-75-9	NULL	Organic compounds	Lipids and lipid-like molecules	Lineolic acids and derivatives	null	Aliphatic acyclic compounds	Endogenous	map00592 alpha-Linolenic acid metabolism
3-Methoxyanthranilate;	SXOPCLUOUFQBJV-UHFFFAOYSA-N	335.123	3.7237	1.57738	0.442255	0.0344168	C05831	C8H9NO3	36.9	0	-1.60514	86.4365	NULL	C05831	PubChem: 8125	NULL	NULL	NULL	NULL	NULL	NULL	NULL	map00380 Tryptophan metabolism
Gibberellin A14 aldehyde	YMDYUWHAQBYOMU-HYAYUQHRSA-N	703.367	4.53	1.65958	0.399803	0.0431572	C11853	C20H28O4	36.6	4.03	8.78644	88.907	NULL	C11853	CAS: 35470-76-9	NULL	NULL	NULL	NULL	NULL	NULL	NULL	map00904 Diterpenoid biosynthesis
10-OPDA	IYEHRWJNUWAXAD-JMTMCXQRSA-N	356.217	3.49512	1.95835	0.380196	0.0220738	C16325	C18H28O3	29.1	5.02	-9.28306	50.6215	NULL	C16325	PubChem: 47205633	NULL	NULL	NULL	NULL	NULL	NULL	NULL	map00592 alpha-Linolenic acid metabolism
Gibberellin A51	HHDWSDSMWJQURA-MHKXYFPYSA-N	365.197	4.57307	1.7715	0.336247	0.0393299	C11865	C19H24O5	31.7	0.306	2.94531	61.4639	null	C11865	56978-14-4	null	Organic compounds	Lipids and lipid-like molecules	Prenol lipids	Diterpenoids	Aliphatic heteropolycyclic compounds	Endogenous	map00904 Diterpenoid biosynthesis
3-Methyldioxyindole;	XCHBYBKNFIOSBB-UHFFFAOYSA-N	205.097	3.08222	2.64552	0.329329	0.00287037	C05834	C9H9NO2	44.8	30.2	-0.247549	94.362	151066	C05834	3040-34-4	null	Organic compounds	Organoheterocyclic compounds	Indoles and derivatives	Indolines	Aromatic heteropolycyclic compounds	Endogenous	map00380 Tryptophan metabolism
Carboxyspermidine	PUDIBYZCMYMCQI-ZETCQYMHSA-N	401.287	3.873	2.69248	0.293191	0.0226121	C18172	C8H19N3O2	38.2	0.302	5.53576	97.2545	NULL	C18172	PubChem: 96024388	NULL	NULL	NULL	NULL	NULL	NULL	NULL	map00330 Arginine and proline metabolism
Formyl-5-hydroxykynurenamine	CKAXPTWYSHDIBN-UHFFFAOYSA-N	241.118	1.1785	2.2826	0.287003	0.0125142	C05647	C10H12N2O3	54.9	81.3	-1.54646	94.8948	440743	C05647	2208-41-5	null	Organic compounds	Benzenoids	Benzene and substituted derivatives	Phenylpropylamines	Aromatic homomonocyclic compounds	Endogenous	map00380 Tryptophan metabolism
L-Kynurenine;	YGPSJZOEDVAXAB-QMMMGPOBSA-N	241.118	1.1785	2.2826	0.287003	0.0125142	C00328	C10H12N2O3	54.9	81.4	-1.54646	94.8948	161166	C00328	343-65-7	L-KYNURENINE	Organic compounds	Benzenoids	Benzene and substituted derivatives	Butyrophenones	Aromatic homomonocyclic compounds	Endogenous	map00380 Tryptophan metabolism
5-Hydroxykynurenine;	OTDQYOVYQQZAJL-UHFFFAOYSA-N	490.198	5.31925	2.23027	0.269716	0.0173744	C05651	C10H12N2O4	37.4	25.5	9.83657	72.3011	440745	C05651	2208-41-5	null	Organic compounds	Benzenoids	Benzene and substituted derivatives	Butyrophenones	Aromatic homomonocyclic compounds	Endogenous	map00380 Tryptophan metabolism
3-Hydroxy-L-kynurenine	VCKPUUFAIGNJHC-LURJTMIESA-N	490.198	5.31925	2.23027	0.269716	0.0173744	C03227	C10H12N2O4	37.5	25.9	9.83657	72.3011	11811	C03227	606-14-4	3-HYDROXY-L-KYNURENINE	Organic compounds	Benzenoids	Benzene and substituted derivatives	Butyrophenones	Aromatic homomonocyclic compounds	Endogenous	map00380 Tryptophan metabolism
L-Formylkynurenine (N-Formylkynurenine)	BYHJHXPTQMMKCA-QMMMGPOBSA-N	490.198	5.31925	2.23027	0.269716	0.0173744	C02700	C11H12N2O4	35.9	16.7	9.33657	73.0656	439788	C02700	null	null	Organic compounds	Benzenoids	Benzene and substituted derivatives	Butyrophenones	Aromatic homomonocyclic compounds	null	map00380 Tryptophan metabolism
Coumarin	ZYGHJZDHTFUPRJ-UHFFFAOYSA-N	188.071	3.08222	3.21299	0.171324	0.00181711	C05851	C9H6O2	45.3	32.2	1.80901	96.4912	323	C05851	91-64-5	COUMARIN	Organic compounds	Phenylpropanoids and polyketides	Coumarins and derivatives	null	Aromatic heteropolycyclic compounds	Drug	map00940 Phenylpropanoid biosynthesis
(6E)-8-Hydroxygeraniol	PREUOUJFXMCMSJ-TXFIJWAUSA-N	212.165	3.59512	2.58395	0.078814	0.0363461	C17621	C10H18O2	39.7	7.04	4.04835	96.2216	NULL	C17621	PubChem: 96023965	NULL	NULL	NULL	NULL	NULL	NULL	NULL	map00902 Monoterpenoid biosynthesis

## Sheet: neg 
14 changed metabolites in negative ion mode. the dada highlighted in blue represent downregulated .
Name	InChIKey	mz	rt	vip	fold_change(group1/group2)	qvalue	Compound_ID	FORMULA	Score	Fragmentation_score	Mass_error	Isotope_score	pubchem_id	kegg_id	cas_id	biocyc_id	kindom	super_class	class	sub_class	molecular_framework	origin	pathway
5-Hydroxyferulic acid methyl ester	YFXWTVLDSKSYLW-NSCUHMNNSA-N	191.036	3.53438	2.05835	0.337789	0.0236363	C05619	C10H10O5	41.7	19.1	5.64881	96.1272	446834	C05619	1782-55-4	null	Organic compounds	Phenylpropanoids and polyketides	Cinnamic acids and derivatives	Hydroxycinnamic acids and derivatives	Aromatic homomonocyclic compounds	Food	map00940 Phenylpropanoid biosynthesis
Tryptophan;	QIVBCDIJIAJPQS-VIFPVBQESA-N	203.083	3.07862	3.39071	0.124047	0.00254201	C00806	C11H12N2O2	39.6	0	0.243852	98.4074	1148	C00806	1954-12-06	null	Organic compounds	Organoheterocyclic compounds	Indoles and derivatives	Indolyl carboxylic acids and derivatives	Aromatic heteropolycyclic compounds	Endogenous	map00380 Tryptophan metabolism
Melatonin;	DRLFMBDRBRZALE-UHFFFAOYSA-N	277.12	5.851	5.26131	0.0338934	0.00254201	C01598	C13H16N2O2	36.8	0	1.39361	85.7449	896	C01598	73-31-4	N-ACETYL-5-METHOXY-TRYPTAMINE	Organic compounds	Organoheterocyclic compounds	Indoles and derivatives	Tryptamines and derivatives	Aromatic heteropolycyclic compounds	Endogenous	map00380 Tryptophan metabolism
2-Aminophenol;	CDAWCLOXVUBKRW-UHFFFAOYSA-N	277.12	5.851	5.26131	0.0338934	0.00254201	C01987	C6H7NO	38.3	0	1.49203	93.1218	NULL	C01987	CAS: 95-55-6	NULL	NULL	NULL	NULL	NULL	NULL	NULL	map00380 Tryptophan metabolism
5-Hydroxy-N-formylkynurenine;	LSTOUSIIVKMJBU-UHFFFAOYSA-N	287.045	0.619133	3.91484	0.121379	0.0212563	C05648	C11H12N2O5	36.6	0	5.7836	89.3962	440744	C05648	null	null	Organic compounds	Benzenoids	Benzene and substituted derivatives	Butyrophenones	Aromatic homomonocyclic compounds	Endogenous	map00380 Tryptophan metabolism
Etherolenic acid	QWRJRLCIDLDGLM-GTTHPXIQSA-N	291.196	6.24318	1.58643	0.568267	0.0186748	C16319	C18H28O3	56.3	96.7	-0.667397	85.6259	NULL	C16319	PubChem: 47205627	NULL	NULL	NULL	NULL	NULL	NULL	NULL	map00592 alpha-Linolenic acid metabolism
5'-S-Methyl-5'-thioinosine	GXYLOXCSJFJFKA-IOSLPCCCSA-N	333.041	3.07862	2.65218	0.273659	0.00252415	C19787	C11H14N4O4S	43.6	47.9	-7.18782	77.957	NULL	C19787	CAS: 17298-58-7	NULL	NULL	NULL	NULL	NULL	NULL	NULL	map00270 Cysteine and methionine metabolism
5'-Methylthioadenosine	WUUGFSXJNOTRMR-IOSLPCCCSA-N	342.089	3.49153	1.9102	0.483171	0.0058938	C00170	C11H15N5O3S	29.7	5.58	4.98149	48.4555	439176	C00170	2457-80-9	5-METHYLTHIOADENOSINE	Organic compounds	Organooxygen compounds	Carbohydrates and carbohydrate conjugates	Glycosyl compounds	Aromatic heteropolycyclic compounds	Endogenous	map00270 Cysteine and methionine metabolism
3-Hydroxykynurenamine	ODOPEICAGBYCFH-UHFFFAOYSA-N	361.185	3.68083	1.48036	0.640114	0.0101124	C05636	C9H12N2O2	35	5.2	-6.67421	77.2698	NULL	C05636	PubChem: 7947	NULL	NULL	NULL	NULL	NULL	NULL	NULL	map00380 Tryptophan metabolism
L-Kynurenine;	YGPSJZOEDVAXAB-QMMMGPOBSA-N	415.16	4.17587	1.93959	0.444471	0.0062206	C00328	C10H12N2O3	36.4	3.4	-5.16743	84.7831	161166	C00328	343-65-7	L-KYNURENINE	Organic compounds	Benzenoids	Benzene and substituted derivatives	Butyrophenones	Aromatic homomonocyclic compounds	Endogenous	map00380 Tryptophan metabolism
Formyl-5-hydroxykynurenamine	CKAXPTWYSHDIBN-UHFFFAOYSA-N	415.16	4.17587	1.93959	0.444471	0.0062206	C05647	C10H12N2O3	36.7	4.8	-5.16743	84.7831	440743	C05647	2208-41-5	null	Organic compounds	Benzenoids	Benzene and substituted derivatives	Phenylpropylamines	Aromatic homomonocyclic compounds	Endogenous	map00380 Tryptophan metabolism
5-Hydroxykynurenamine	JANBBPTXDKFOQR-UHFFFAOYSA-N	419.192	4.96022	2.17244	0.321142	0.0222548	C05638	C9H12N2O2	37.8	6.37	-5.04722	88.2701	164719	C05638	708-23-6	null	Organic compounds	Benzenoids	Benzene and substituted derivatives	Phenylpropylamines	Aromatic homomonocyclic compounds	Endogenous	map00380 Tryptophan metabolism
Copal-8-ol diphosphate	ZDGVATANBJCRHY-NUKBDRAPSA-N	503.176	4.13302	1.35333	0.667591	0.0142343	C20270	C20H38O8P2	36.2	2.64	5.30168	84.5755	NULL	C20270	PubChem: 163312010	NULL	NULL	NULL	NULL	NULL	NULL	NULL	map00904 Diterpenoid biosynthesis
Red chlorophyll catabolite	FVQXHICSWIZJBT-DGQKFSKRSA-N	625.27	3.998	2.1684	0.287105	0.033778	C18022	C35H38N4O7	37.8	17.4	5.8288	78.3527	NULL	C18022	PubChem: 96024242	NULL	NULL	NULL	NULL	NULL	NULL	NULL	map00860 Porphyrin and chlorophyll metabolism
