# Supplementary material for: Integrative Proteomic and Metabolomic Analysis Reveals the Cotton Plant Defense Mechanisms Induced by Insect (<em>Adelphocoris suturalis</em> Jakovlev) Feeding
Source: Preprints.org preprint supplement (doi:10.20944/preprints201809.0058.v1), 2018-09-04
Supplement: Supplementary file 7 [file Table S5.xlsx]

## Sheet: 工作表1
Proteins changed in the alpha-linolenic acid metabolism pathway, the dada highlighted in red represent upregulated protein in blue represent downregulated protien
Protein name	Protein_ID	NCBInr Description	log2 fold change	Mass	Protein Coverage	Uniq_Pep_Num	Uniq_Spec_Num	Sameset	Mean_Ratio_P48E_113/P48C_119	Ratio_P48E_113/P48C_119	SD_P48E_113/P48C_119	Quant_Num_P48E_113/P48C_119	Qvalue_P48E_113/P48C_119	Protein_Seqence	NCBInr Identity	NCBInr E-value	NCBInr Accession	Swissprot Identity	Swissprot E-value	Swissprot Accession	Swissprot Description	Tremble Identity	Tremble E-value	Tremble Accession	Tremble Description	Protein_or_Domain	COG Score	COG E-value	COG ID	COG Function-Description	COG Code	COG Function-Categories	KEGG(ko_id|rank|evalue|score|identity|ko_definition)	GO Biological_Process	GO Cellular_Component	GO Molecular_Function
AOS	CotAD_35840	allene oxide synthase	0.8	56361	0.06	2|-|-	2|-|-	Cotton_D_gene_10025794/-/-	1.76	1.759|-|-	-	2|-|-	0.031|-|-	MASSATLSSRRANVRSRLSVTVSELEKPELPLKSIPGDYGLPFIGAIKDRLDYFYNQGRDEFFKFKIQKYQSTVLRTNMPPGPFISSNPKVVALLDGKSFPILFDISKVEKKDLFTGTYMSSTYLTGGYRILSYLDPSEPKHAKLKQLLFFLLKSSRDRVLPEFKACYTELFKTVEYELAEKGKCSFQTPSEQAAFNFLARAFFDSNPVDSKLGSDGPSLANKWVLFQLGPIFTLGLPKYIEDLLLHTFPLPSFLVKNDYKKLYDFFYESAGLVLDEAEKMGISRDEACHNLVFATCFNSFGGIKVFFPIMLKWIGLAGENLHLSLAKEIRSVIKSNGGELSLSAMEQMPLMKSVVYESFRIDPPVQFQYGKAKKDLLIESHHAVYEVKEGEMLFGYQP…	69.22	0	gi|63029720|gb|AAY27751.1|	67.74	0	sp|P48417|CP74_LINUS	Allene oxide synthase, chloroplastic OS=Linum usitatissimum GN=CYP74A PE=1 SV=1	69.22	0	Q4ZJ74	Q4ZJ74_HEVBR Allene oxide synthase OS=Hevea brasiliensis GN=aos PE=2 SV=1	-	-	-	-	-	-	-	K01723|1|0.0|712|tcc:TCM_033962|EC[not_get]			binding catalytic_activity
	Cotton_D_gene_10023640	cytochrome P450 allene oxide synthase	0.4	58823.7	0.207	4|4|3	7|6|7	CotAD_38485/CotAD_38485/CotAD_38485	1.33	1.309|1.353|1.314	0.001	7|6|7	0.041|0.079|0.021	MASSSLPFTSLHPQFVSPNTKSSTTRLSSRRIRASVSEKPPVPAPAVAVPAKGETKLPLKKIPGNYGVPIVGPFKDRLDYFYNQGRDEFFKSKIQKYNSTVFRTNMPPGPFISQDPKVVALLDGKSFPVLFDVTKVEKKDLFTGTYMPSTDLTGGYRILSYLDPSEPKHARLKQLLFFLLKSRRDHVIPEFQASYSELFETLEKEVAEKGKSSFQTANDQAGFNFLSRAFFGSNPPDTKLGTDGPSLISKWVLFQLGPVLKLGLPKYVEELLIHTFPLPPALVKKDYQRLYDFFYESSGSIQDEAEKLGISREEACHNLLFATCFNSFGGMKIFFPNMLKWIGRAGIKLHNRLATEIRSAIRSNGGKLTMAAMEQMPLMKSVVYEALRIEPPVPLQYGR…	75.71	0	gi|224067296|ref|XP_002302453.1|	70.28	0	sp|P48417|CP74_LINUS	Allene oxide synthase, chloroplastic OS=Linum usitatissimum GN=CYP74A PE=1 SV=1	75.71	0	B9GP05	B9GP05_POPTR Cytochrome P450 allene oxide synthase OS=Populus trichocarpa GN=CYP74A1 PE=4 SV=1	-	-	-	-	-	-	-	K01723|1|0.0|826|tcc:TCM_033962|EC[not_get]			binding catalytic_activity
PLA1	CotAD_52791	phospholipase A1-IIgamma-like	0.7	46925.6	0.118	4|1|3	4|1|3	Cotton_D_gene_10001913/Cotton_D_gene_10001913;CotAD_69256/Cotton_D_gene_10001913;CotAD_69256	1.63	1.677|1.861|1.362	0.064	4|1|3	0.001|0.213|0.346	MVKSDMASQWRVLSGENDWDGLLQPLNLDLRRYIIHYGQRAGSVGDLYNQNKHGEFPKEKFFAEAGLEKGNDFKYSVTHYIHAGSDIVEPAWFGFVAVTTDEGKAVLGRRDILIAWRGTIHYTEWINDLIADPKSASKLFGIGTEAKVHSGFLSLYTGTRSNSAVDHLSARDQVRDALRELMDKYKDEEISITVTGFSLGGALATLNAMDIVANGYNKPSSTLLGANNPCMVTTFTFGSPQVGDSGFKQLFKKLVDHHHLRLLRIRNANDPVHKWPFCTLTHVGKKLTVYSNKSPYLKYKWFFGRTLECTDNPPPNDYHPNIVTEEEIIANRGLLINWVADSVSAHNMDVYLHGIAGVQEGTSAFHLEVDLDFALVNKYLDRLKDDYKIPDHWWAGENR…	42.4	2e-107	gi|470115480|ref|XP_004293927.1|	38.72	2e-90	sp|O49523|DSEL_ARATH	Phospholipase A1-IIgamma OS=Arabidopsis thaliana GN=DSEL PE=1 SV=1	44.83	5e-106	G7IKB6	G7IKB6_MEDTR Lipase OS=Medicago truncatula GN=MTR_2g015690 PE=4 SV=1	-	-	-	-	-	-	-	K16818|1|5e-41|153|egr:104446339|EC[not_get]	-	-	-
	CotAD_64088	predicted protein	-0.4
ADH	CotAD_58616	alcohol dehydrogenase	0.4	47428.4	0.071	3|2|1	5|4|1	Cotton_D_gene_10036258;CotAD_27987/Cotton_D_gene_10036258;CotAD_27987/Cotton_D_gene_10036258;CotAD_27987	1.32	1.383|1.339|1.248	0.005	5|4|1	0.038|0.029|0.679	MGFPSILSRIAISRNLLSSKPTNPTILLSSRWFSNLVANNIDKAERSLPSSSAAYHVSSGGYMRGTVFWEPDTPLTIEEFHMPRPKAGEVLIKTKACGVCHSDLHVIKGEIPFSSPCVIGHEVTGEIVEHGPLTDRKIIERFPIGSQVVGAFIMPCGNCFFCSKGHDDLCEDFFSYNRAKGTLYDGETRLFLRNSGKPVYMYSMGGLAEYCVIPAHGLAILPKSLPYTESAILGCAVFTAYGAMRHAAEVCPGDSIAVIGVGGVGSSCLQIAKAFGASLVIAVDIQNDKLQKAKTLGATHTVNAIEEDAIERIKEITGGPGVDIAVEALGKPQTFLQCLQSVRDGGKAVMIGLSKAGAIGEVDINRLVRRKIRVIGSYGARARQDLPKLVKLAETGIFN…	76.31	0	gi|255544387|ref|XP_002513255.1|	41.46	9e-77	sp|A4YGN0|SUCD_METS5	Succinate-semialdehyde dehydrogenase (acetylating) OS=Metallosphaera sedula (strain ATCC 51363 / DSM 5348) GN=Msed_1424 PE=1 SV=1	76.31	0	B9RHN6	B9RHN6_RICCO Alcohol dehydrogenase, putative OS=Ricinus communis GN=RCOM_1763070 PE=4 SV=1	NMA1518	158	1e-43	COG1062	Zn-dependent alcohol dehydrogenases, class III	C	Energy production and conversion ;	K00121|1|1e-42|157|cme:CYME_CMS125C|EC[not_get]!K18857|3|5e-40|150|pvu:PHAVU_001G064000g|EC[not_get]	metabolic_process		binding catalytic_activity
ADH-A	CotAD_64340	alcohol dehydrogenase A	-0.3
	Cotton_D_gene_10007846	hypothetical protein	0.7	19901.1	0.107	1|1|-	5|7|-	CotAD_21495;Cotton_D_gene_10008831/CotAD_21495/-	1.6	1.522|1.679|-	-	5|7|-	0.035|0.002|-	MAASDKVQELHVYEMNERDRGSPAYLRLSQKPVNSLGDIVPFSNKIYRGDLEKRIGITAGMCILIEHKPELKGDRYEAIFSFYFGDYGHIAVQGPYLTYQDSYLAITGGSGIFEGVSGQVKLHQIVFPFKIFYTFYLKGIGELPEELLCKPVDPHPAVEAAPAAKACEPHAAIANFTN	85.21	2e-88	gi|462411191|gb|EMJ16240.1|	66.29	2e-70	sp|Q93ZC5|AOC4_ARATH	Allene oxide cyclase 4, chloroplastic OS=Arabidopsis thaliana GN=AOC4 PE=2 SV=1	79.19	6e-87	F6KBT1	F6KBT1_SOYBN Allene oxide cyclase 1 OS=Glycine max GN=AOC1 PE=2 SV=1	-	-	-	-	-	-	-	K10525|1|5e-97|283|tcc:TCM_019506|EC[not_get]	-	-	-
AOC4	Cotton_D_gene_10007844	Allene oxide cyclase 4	0.4	27324.9	0.134	2|2|3	13|11|14	Cotton_D_gene_10007843;CotAD_21496;CotAD_21497/Cotton_D_gene_10007843;CotAD_21496;CotAD_21497/Cotton_D_gene_10007843;CotAD_21496;CotAD_21497	1.29	1.272|1.275|1.331	0.001	13|11|11	0.001|0.006|0.001	MSALRSTISSGIIRSTSPTHSLLPAASSFKPIKNPCLPQTHKLFTSNSNTFSAPKRGFTCKSQAIPSDNSAPEKVQELHVYELNERDRGSPAYLRLSQKSVNSLGDLVPFSNKIYRGDLEKRIGITSGICILIEHKPEMKGDRYEAIFSFYFGDYGHIAVQGPYLTYQDTYLAITGGSGIFEGVSGQVKLHQIVFPFKIFYTFYLKGIGELPEELLCKPVDPHPAVEAVPAAKACEPHATIANFTN	73.31	2e-118	gi|255579071|ref|XP_002530384.1|	64.02	2e-81	sp|Q93ZC5|AOC4_ARATH	Allene oxide cyclase 4, chloroplastic OS=Arabidopsis thaliana GN=AOC4 PE=2 SV=1	73.31	3e-117	B9SWL5	B9SWL5_RICCO Allene oxide cyclase 4, chloroplast, putative OS=Ricinus communis GN=RCOM_0015290 PE=4 SV=1	-	-	-	-	-	-	-	K10525|1|2e-145|409|tcc:TCM_019506|EC[not_get]		cell cell_part organelle	catalytic_activity
OPR1	CotAD_59461	12-oxophytodienoate reductase opr	0.5	44082.5	0.096	1|-|-	5|-|-	-/-/-	1.39	1.389|-|-	-	4|-|-	0.011|-|-	MADSQGTPTLFSPYKMGKFNLSHRVVLAPMTRCRALNGIPRPALAEYYTQRSTPGGFLITEGTLISDTGAGFPHVPGIYNEEQVEAWKMIVDAVHAKGGIIFCQLWHVGRASHTVYQPGGVAPISSTNKPISKRWRIVMRDGSYGIYPKPRPLETSEIQEVVEHYRKAALNAIRAGFDGIEIHGAHGYLIDQFLKDGINDRTDEYGGSLANRCKFLMQIVQAVASAIGIDRVAVRMSPAIDHLDATDSNPLNLGLAVIERLNKLQLQLGSKLAYLHVMQPRYHAYGQTESGKHGNEDEEAYLLRALKRTYHGTFMCSGGFNRELGMQAVAEGDADLVSYGRLFISNPDLVFRLKVNAPLNRYIRKTFYTHDPVVGYTDYPFLNEEKGRQVLSRL	81.91	0	gi|255550473|ref|XP_002516287.1|	76.77	0	sp|Q9FEW9|OPR3_SOLLC	12-oxophytodienoate reductase 3 OS=Solanum lycopersicum GN=OPR3 PE=1 SV=1	81.91	0	B9RRB8	B9RRB8_RICCO 12-oxophytodienoate reductase opr, putative OS=Ricinus communis GN=RCOM_0712140 PE=4 SV=1	SPAC5H10.10	221	3e-68	COG1902	NADH:flavin oxidoreductases, Old Yellow Enzyme family	C	Energy production and conversion ;	K05894|1|0.0|739|tcc:TCM_037547|EC[not_get]	metabolic_process		binding catalytic_activity
OPR2	Cotton_D_gene_10037325	12-oxophytodienoate reductase opr	0.4	44004.4	0.114	1|1|1	2|1|3	CotAD_00365/CotAD_00365/CotAD_00365	1.3	1.729|1.015|1.164	0.142	2|1|4	0.040|0.985|0.260	MADSQGTPTLFSPYKMGKFNLSHRVVLAPMTRCRALNGIPRPALAEYYTQRSTPGGFLITEGTLISDTGAGFPHVPGIYNEEQVEAWKMIVDAVHAKGGIIFCQLWHVGRASHTVYQPGGVAPISSTNKPISKRWRILMPDGSYGIYPKPRPLETSEIQEVVEHYHKAALNAIRAGFDGIEIHGAHGYLIDQFLKDGINDRTDEYGGSLANRCKFLMQIVQAVASAIGIDRVAIRMSPAIDHLDATDSNPLNLGLAVIERLNKLQLQLGSKLAYLHVTQPRYHAYGQTESGKHGNEDEEAYLLKELKRTYQGTFMCSGGFNRELGMQAVAEGDADLVSYGRLFISNPDLVLRLKVNAPLNRYIRKTFYTHDPVVGYTDYPFLNEEKGRQVQSRL	82.43	0	gi|255550473|ref|XP_002516287.1|	76.77	0	sp|Q9FEW9|OPR3_SOLLC	12-oxophytodienoate reductase 3 OS=Solanum lycopersicum GN=OPR3 PE=1 SV=1	82.43	0	B9RRB8	B9RRB8_RICCO 12-oxophytodienoate reductase opr, putative OS=Ricinus communis GN=RCOM_0712140 PE=4 SV=1	VCA0998	218	3e-67	COG1902	NADH:flavin oxidoreductases, Old Yellow Enzyme family	C	Energy production and conversion ;	K05894|1|0.0|751|tcc:TCM_037547|EC[not_get]	metabolic_process		binding catalytic_activity
	CotAD_59374	AMP dependent CoA ligase	0.6	59914.3	0.077	1|1|2	4|1|3	CotAD_42362;Cotton_D_gene_10036712/-/CotAD_42362;Cotton_D_gene_10036712	1.53	1.630|1.687|1.262	0.053	4|2|3	0.001|0.063|0.161	MAENMSLAIDPRSGFCRSNSTFYSKRKPIPLPKNDSLDVTTFISARAHHGKVAFIDAATGRHLTFSELWRAVDSVATCLSDMGIRKGHVVLLLSPNSIFFPIVCLSVMSLGAIITTTNPLNTANEIGKQVADSKPVLAFTIPQLLPKLAGSTIPIVLLEDHLSSQAGEAKIVTTLHQMMKREPSGSRVRDQVNQDDTATLLYSSGTTGASKGVVSSHRNLIAMVQTVINRFSIEVGEKFICTVPMFHIYGLVAFATGLLASGSTVIVLSKFEMHDMLSTIEKYRATYLPLVPPILVAMVNAADQIRKKYDLSSLHSALSGGAPLSKEVIEGFLEKYPNVKILQGYGLTESTGIGASTDSLEESRKYGTAGMLSPSMEAKVVDPDSGKALNVNQTGELWL…	79.67	0	gi|255539150|ref|XP_002510640.1|	76.98	0	sp|Q84P21|4CLL5_ARATH	4-coumarate--CoA ligase-like 5 OS=Arabidopsis thaliana GN=4CLL5 PE=1 SV=2	79.67	0	B9R8J7	B9R8J7_RICCO AMP dependent CoA ligase, putative OS=Ricinus communis GN=RCOM_1600450 PE=4 SV=1	NMA1743	223	4e-65	COG0318	Acyl-CoA synthetases (AMP-forming)/AMP-acid ligases II	IQ	Lipid transport and metabolism ; Secondary metabolites biosynthesis, transport and catabolism ;	K10526|1|0.0|1014|tcc:TCM_034347|EC[not_get]	metabolic_process		catalytic_activity
	CotAD_52391	unnamed protein product	0.6	77684	0.102	4|-|4	5|-|4	Cotton_D_gene_10014805/-/Cotton_D_gene_10014805	1.52	1.595|-|1.450	-	5|-|4	0.008|-|0.003	MEPSQTVEDKSQPSVATVTRRIQRLSLHLIPLPPLQCSPQLDMLTCAKANKQEVDVASLSSYMRGKHREIQEKIFDFFNSRPDLQTPTEISMKEHRELCLRQLLGLVREGKIKPFRYVVEDPAKYFAISEAVGSIDISLGIKFGVQYSLWGGSVLNLGTKKHRDKYFDGIDNLDYLGCFAMTELHHGSNVQGLQTVATFDPITDEFIIDTPNDGAIKWWIGNAAVHGKFATVFARLVLPTHDSKGVSDMGVHAFIVPIRDLKTHQPLPGIEINDCGHKIGLNGVDNGALRFRSVRIPRDNLLNRFGDVTRDGKYTSSLPTINKRFAATLGELVGGRVGLAHSSVGILKIAVTIAVRYSLLRQQFGPPKQPEVSILDYQSQQHKLMPMLASTYAFYFATQ…	84.87	0	gi|312282043|dbj|BAJ33887.1|	83.45	0	sp|O65201|ACOX2_ARATH	Acyl-coenzyme A oxidase 2, peroxisomal OS=Arabidopsis thaliana GN=ACX2 PE=1 SV=2	84.87	0	E4MWA4	E4MWA4_THEHA Acyl-coenzyme A oxidase OS=Thellungiella halophila PE=2 SV=1	VNG2499G	72.8	3e-13	COG1960	Acyl-CoA dehydrogenases	I	Lipid transport and metabolism ;	K00232|1|0.0|1294|tcc:TCM_001150|EC[not_get]	cellular_process metabolic_process single-organism_process	cell cell_part organelle	binding catalytic_activity
	Cotton_D_gene_10040584	acyl-coenzyme A oxidase 4	0.6	48053.7	0.085	2|-|-	5|-|-	CotAD_74829/-/-	1.51	1.514|-|-	-	3|-|-	0.011|-|-	MILPSKFQDETEKSDKPSPPLDVSVAFPQASPASVFPPSVSDYYRFDDLLSPEEKTLRMKVREFMEKEVAPIMAEYWEKAEFPFQILPKLADLGIAGFNTEGYGSPGLSITTSAIANAEIARVDASCSTFLLVHSVGMLTIASCGSEEQKQKYLPSLAQLKTIACWALTEPEYGSDASAVNTTARKVEGGWIIDGQKRWIGNSTFADVLVIFARNITTNQINGYIVKKNSPGLKATKIANKIGVRIVQNGDILLKNVFVPDEDRLPGLNSFLDTNKVLAVSRVMVAWQPIGISMGVYDMCLRYLKERKQFGAPLAAFQLNQQKLSLMLGDIQAMTLVGWRLCKLYDKGKMTPGHASLGKSWITLRARETVVLGRELLGGNGILADFHVAKAFCDMEPIY…	78.72	0	gi|359481157|ref|XP_003632582.1|	76.44	0	sp|Q96329|ACOX4_ARATH	Acyl-coenzyme A oxidase 4, peroxisomal OS=Arabidopsis thaliana GN=ACX4 PE=1 SV=1	79.53	0	D7SY23	D7SY23_VITVI Putative uncharacterized protein OS=Vitis vinifera GN=VIT_08s0105g00460 PE=3 SV=1	APE2158	173	5e-49	COG1960	Acyl-CoA dehydrogenases	I	Lipid transport and metabolism ;	K00232|1|0.0|722|tcc:TCM_021674|EC[not_get]	metabolic_process		binding catalytic_activity
AOC3	CotAD_12782	acyl-CoA oxidase 3	0.4	78103.5	0.044	1|-|-	1|-|-	-/-/-	1.36	1.362|-|-	-	4|-|-	0.014|-|-	MDRAFQRTKVLTDHLLQSPPSSSFQTPSLSSNACLNYSPPELSEKYAFDINDMRKLMDGHDLEERDRLFGMITQSKVFNPRVRGGKVFVSPDYNQSMEQQREMTWKRIEYLFERGVFEGWLTGEGEEIEMRRFACFEVLGLFDHSISIKLGVHFFLWGGAIQFFGTKHHHDKWLRDTENYLIKGCFAMTELGHGSNVRGIETITTYDSNTGEFVINTPCESAQKYWIGGAANHATHTIVFSQLNINGTNQGVHALIAQIRDADGNVRPNIRIADCGHKIGLNGVDNGRIWFDNVRVPRENLLNSVADVSPDGKYLSAIKDPDQRFAAFLAPLTAGRVNIAVNAVYQSKVGLAIAIRYALTRRAFSLKPKEPEVLLLDYPSHQRRLLPLLAKTFAMSFGA…	75.07	0	gi|402715754|gb|AFQ93695.1|	69.97	0	sp|P0CZ23|ACOX3_ARATH	Acyl-coenzyme A oxidase 3, peroxisomal OS=Arabidopsis thaliana GN=ACX3 PE=1 SV=1	74.35	0	G8XNW7	G8XNW7_MALDO Acyl-coenzyme A oxidase OS=Malus domestica PE=2 SV=1	BH1130	57	5e-08	COG1960	Acyl-CoA dehydrogenases	I	Lipid transport and metabolism ;	K00232|1|0.0|1234|tcc:TCM_008258|EC[not_get]	cellular_process metabolic_process single-organism_process	cell cell_part organelle	binding catalytic_activity
	CotAD_18083	predicted protein	0.3	85651.3	0.153	10|5|5	18|11|16	-/-/-	1.24	1.234|1.303|1.191	0.003	20|12|15	0.001|0.012|0.001	MGSKKGRTMVEVGADGVAVITIINPPVNSLSLDVLQSLKESFDEALQRDDVKAIVVAGANGKFSGGFDISAFGGIQQGAVQQPKSGYVSVEVLTDTIEAARKPSVAAIDGLALGGGLEVAMVCHARISTPTAQLGLPELQLGLIPGFGGTQRLPRLVGLAKSLEMMLTSKPVKGEEALGLGLVDAVVSSHELVNAARQWALDILARRNPWVATLYKTDKIEPLGEARQILNFARAQTRKRAPNLKHPLVCIDVIEEGIVNGPKPALYKEVEAFQGLLKSDTSKSLIHIFFAQRGTSKVPGITDRGLVPRKVKKVAILGGGLMGSGIATALLLSNYTVILKEVNEKFLEAGIGRVKANLGSRVKKGQMTREKFEKTMSLLRGVLDFESFRDVDMVIEAVI…	82.65	0	gi|224107106|ref|XP_002314377.1|	78.98	0	sp|Q9ZPI5|MFP2_ARATH	Peroxisomal fatty acid beta-oxidation multifunctional protein MFP2 OS=Arabidopsis thaliana GN=MFP2 PE=1 SV=1	82.65	0	B9HXS9	B9HXS9_POPTR Predicted protein OS=Populus trichocarpa GN=POPTRDRAFT_725677 PE=3 SV=1	CC0076_2	195	2e-54	COG1250	3-hydroxyacyl-CoA dehydrogenase	I	Lipid transport and metabolism ;	K10527|1|0.0|1297|tcc:TCM_021238|EC[not_get]	cellular_process metabolic_process single-organism_process		binding catalytic_activity
	CotAD_51900	hypothetical protein	0.8	49197.1	0.166	2|1|-	2|2|-	-/CotAD_44796/-	1.73	1.719|1.747|-	-	2|2|-	0.040|0.048|-	MEKALNRQRVLLHHLRPSSSSSSHESAAALFPSNCAAGDSAAYHRTAAFGDDVVIVAACRTAICKAKRGGFKDTLADDLLAPVLKALIDRTKLDPSEVSDIVVGTVLAPGSQRGIECRMAAFYAGFPDTVPIRTVNRQCSSGLQAVADVAASIKAGFYDIGIGAGLESMTTDKVVPGVPKVNPKVESFAQARDCLLPMGITSENVAEHYGVTRQEQDQAAVESHRRAAAATASGKFKDEIVPVLTKIVDPKTGEEKAATIMVDDGIRPNTNMADLVKLKPAFKKDGTTTAGNASQVSDGAGAVLLMKRSLAMQKGLPILGVFRSFAAVGVDPAVMGIGPAVAIPAAIKSAGLELDDIDLFEINEAFASQFVYSCKKLGLDREKVNVNGGAIALGHPLGA…	82.01	0	gi|462396404|gb|EMJ02203.1|	77.54	0	sp|Q56WD9|THIK2_ARATH	3-ketoacyl-CoA thiolase 2, peroxisomal OS=Arabidopsis thaliana GN=PED1 PE=1 SV=2	80.69	0	B9S554	B9S554_RICCO 3-ketoacyl-CoA thiolase B, putative OS=Ricinus communis GN=RCOM_1721350 PE=3 SV=1	STM3982	268	3e-85	COG0183	Acetyl-CoA acetyltransferase	I	Lipid transport and metabolism ;	K07513|1|0.0|717|tcc:TCM_003008|EC[not_get]			catalytic_activity
3-KAT-2	CotAD_10744	3-ketoacyl-CoA thiolase 2	0.7	48143.6	0.24	3|2|4	6|3|12	-/-/-	1.63	1.707|1.765|1.422	0.034	6|3|12	0.008|0.148|0.003	MEKAINRQQVLLNHLQPSSQSHQSSAAILFPSNCAAGDSAAYHRTAAFGDDVVIVAACRTAICKAKRGGFKDSLADDLLAPVLKAVIDRTKLNPSEVGDIVVGTVLAPGSQRAMECRMAAFYAGFPDTVPIRTVNRQCSSGLQAVADVAACIKAGFYDIGIGAGLESMTTNGSAPDQSKVNPKVKSFAQARDCLLPMGITSENVAQRYGVTRQEQDQAAVESHRRAAAATASGKFKEEIVPVSTKIVDPKTGEEKAVTISVDDGIRPDTNMAGLAKLKPAFKKDGTTTAGNASQVSDGAGAVLLMKRSLALQKGLPILGVFRSFAAVGVDPAVMGIGPAVAIPAAVKSAGLEIDDIDLFEINEAFASQFVYSCKKLGLDREKVNVNGGAIALGHPLGVT…	82.86	0	gi|470107804|ref|XP_004290230.1|	80.13	0	sp|Q56WD9|THIK2_ARATH	3-ketoacyl-CoA thiolase 2, peroxisomal OS=Arabidopsis thaliana GN=PED1 PE=1 SV=2	81.94	0	D7TS82	D7TS82_VITVI Putative uncharacterized protein OS=Vitis vinifera GN=VIT_05s0051g00720 PE=3 SV=1	SPy1637	270	6e-86	COG0183	Acetyl-CoA acetyltransferase	I	Lipid transport and metabolism ;	K07513|1|0.0|757|tcc:TCM_003008|EC[not_get]			catalytic_activity
	CotAD_66777	hypothetical protein	0.7	49484.1	0.306	6|7|2	24|15|3	Cotton_D_gene_10023917/Cotton_D_gene_10023917/Cotton_D_gene_10023917	1.62	1.437|1.562|1.859	0.047	24|15|3	0.001|0.002|0.014	MEKAINRQQVLLQHLNPSASSFSSHQNNSALSASACLAGDSAAYQRTNVFGDDVVIVAAYRTALCKSKRGGFKDTYPDDLLAPVLRAVIEKTNLNPSEVGDIVVGTVLAPGSQRASECRMAAFYAGFPETVPVRTVNRQCSSGLQAVADVAAAIKAGFYEIGIGAGLESMTTNPMAWEGSVNPRVKQMEQAQNCLLPMGITSENVAHRFGVTRQEQDQAAVESHRKAAAATASGKFKDEIVPVATKIVDPKTGDEKPVTISVDDGIRANTSVSDLGKLKPVFKKNGTTTAGNSSQVSDGAGAVLLMKRSVAMRKGLPILGVFRTFAAVGVDPAIMGVGPAVAIPAAVKSAGLELDDVDLFEINEAFASQFVYCQKKLELDPQKINVNGGAMAIGHPLGV…	87.5	0	gi|147866537|emb|CAN81585.1|	84.91	0	sp|Q56WD9|THIK2_ARATH	3-ketoacyl-CoA thiolase 2, peroxisomal OS=Arabidopsis thaliana GN=PED1 PE=1 SV=2	87.5	0	A5BXL8	A5BXL8_VITVI Putative uncharacterized protein OS=Vitis vinifera GN=VITISV_023191 PE=3 SV=1	BH2029	269	1e-85	COG0183	Acetyl-CoA acetyltransferase	I	Lipid transport and metabolism ;	K07513|1|0.0|801|tcc:TCM_020387|EC[not_get]			catalytic_activity
	CotAD_27039	predicted protein	2.3	41580.9	0.019	-|1|-	-|1|-	-/CotAD_65448/-	4.91	-|4.909|-	-	-|1|-	-|0.032|-	MEVVQVLHMNGGVGETSYAKNSLLQQKVITMTKPITEEAITKLYCSKYPEEIAIADLGCSSGPNTFFLVSELLKVVDSVRQKIGQKSPEYQVFLNDLPGNDFNTIFRSLSIFQNKLRKQLGPGNGPCFFTGVPGSFYGRLFRKNSLHFVHSSYSLHWLSQVPQGLESNKRNIYMASTSPPDVLKAYYVQFQKDFSLFLKCRSEELVDGGRMVLTLIGRRSDDPSSKECCYFWELLAMPLSDMLVEGLIEEEKLNSFNIPMYTPSPAEVKYEVVKEGSFNIDRLEVTEVNWNAYLDETDLSDAFKDGGYNVAKCMRAVAEPLLASYFGEEILDEVFRRYREIISDRLSKEKNEFVNVTVSLIKP	73.76	0	gi|224097038|ref|XP_002310820.1|	60.99	3e-164	sp|Q9SPV4|SAMT_CLABR	Salicylate O-methyltransferase OS=Clarkia breweri GN=SAMT PE=1 SV=1	73.76	0	A9PF83	A9PF83_POPTR Predicted protein OS=Populus trichocarpa GN=POPTRDRAFT_563193 PE=2 SV=1	-	-	-	-	-	-	-	K08241|1|0.0|651|tcc:TCM_000324|EC[not_get]	cellular_process metabolic_process single-organism_process		catalytic_activity
