# Supplementary material for: Integrative Proteomic and Metabolomic Analysis Reveals the Cotton Plant Defense Mechanisms Induced by Insect (<em>Adelphocoris suturalis</em> Jakovlev) Feeding
Source: Preprints.org preprint supplement (doi:10.20944/preprints201809.0058.v1), 2018-09-04
Supplement: Supplementary file 8 [file Table S6.xlsx]

## Sheet: search parameters
The search parameters
Item	Vlue
threshold set-off	0.05
enzyme	trypsin
fragment mass tolerence	0.1Da
mass values	monoisotopic
mass values	oxidation(M), iTRAQ8plex(Y)
peptide mass tolerance	0.05Da
fixed modifications	carbamidomethyl(C), iTRAQ8plex(N-term), iTRAQ8plex (K)

## Sheet: MS parameters
Mass spectrometry parameters.
	Positive ion mode	Negative ion mode
Capillary voltage	3kV	2 kV
Sampling cone	60 kV	40 kV
Source temperature	120 °C	120 °C
Desolvation temprature	600 °C	350 °C
Desolvation/Cone gas	800/100 L/h	800/50 L/h
Source offset	80	80
TOF acquisition mode	Sencitivity	Sensitivity
Acquisition method	Continuum MS E	Continuum MS E
TOF mass range	50-1200Da	50-1200Da
Scan time	0.1s	0.1s
Collision energy function 2	Trap CE ramp 20 to 40 eV	Trap CE ramp 20 to 40 eV

## Sheet:  Primers
Primers used in RT-qPCR.
Primer name	Sequence (5'to3')
qAOS-F	TGTCCGCAATGGAACAAATG
qAOS-R	CTTTCTTCGCCTTTCCGTATTG
qAOC-F	GAGCATAAACCCGAAATGAAAGG
qAOC-R	GTGTCCTGGTAAGTCAAGTAAGG
qADH-F	CTCTAAACCCACCAATCCTACC
qADH-R	TAAGCAGCCGAAGATGATGG
qPLA1-F	ATCTCCGCCGCTACATTATTC
qPLA1-R	GGGAATTCACCATGTTTGTTCTG
qOPR1-F	TTCAATAGGGAGCTGGGAATG
qOPR1-R	ACCTAAAGACTAGGTCAGGATTTG
qOPR2-F	AGTAGCTTCAGCCATTGGTATAG
qOPR2-R	GCCTAGGTTGAGCGGATTAG
qHistone-F	GTGGATCAGTCGCTTAGAAGA
qHistone-R	CATCACATCACATTGAACCTACC
qUBQ7-F	GAATGTGGCGCCGGGACCTTC
qUBQ7-R	ACTCAATCCCCACCAGCCTTCTGG
